# Supplementary material for: Synthesis of β-nitro ketones from geminal bromonitroalkanes and silyl enol ethers by visible light photoredox catalysis
Source: Royal Society of Chemistry journal article supplement (doi:10.1039/d1cc06529g), 2022-01-01

## Supporting Information

### **Synthesis of $\beta$ -Nitro Ketone from Geminal Bromonitroalkane and Silyl Enol Ether by Visible Light Photoredox Catalysis**

Haoying Cao, Shanshan Ma, Yanhong Feng, Yawen Guo and Peng Jiao\*

College of Chemistry, Beijing Normal University, Beijing 100875, P.R. China

E-mail: [pjiao@bnu.edu.cn](mailto:pjiao@bnu.edu.cn)

## Table of contents

|                                                      |    |
|------------------------------------------------------|----|
| 1. General information .....                         | 1  |
| 2. Optimization of reaction conditions.....          | 1  |
| 3. Preparation of silyl enol ethers .....            | 3  |
| 4. Preparation of <i>gem</i> -bromonitroalkanes..... | 19 |
| 5. Photocatalytic coupling reactions. ....           | 27 |
| 6. Conversions of coupling products .....            | 46 |
| 7. Radical-trapping experiments .....                | 50 |
| 8. Unsuccessful coupling reactions.....              | 51 |
| 9. References.....                                   | 53 |
| 10. Crystal data .....                               | 58 |
| 11. NMR spectra .....                                | 66 |

## 1. General information

All the solvents and reagents were obtained from commercial sources and used without purification unless stated otherwise. THF, Et<sub>2</sub>O and 1,4-dioxane were distilled over CaH<sub>2</sub> and LiAlH<sub>4</sub> under N<sub>2</sub>. Toluene, CH<sub>2</sub>Cl<sub>2</sub> and CH<sub>3</sub>CN were distilled over CaH<sub>2</sub> under N<sub>2</sub>. Acetone, AcOEt, DMSO, DMA, DMF, DME, CHCl<sub>3</sub>, C<sub>2</sub>H<sub>5</sub>NO<sub>2</sub>, CH<sub>3</sub>NO<sub>2</sub> and DBU were dried over activated 4A molecular sieves. All glassware was dried overnight at 100 °C prior to use. All visible light induced photocatalytic reactions were performed in a Schlenk tube under N<sub>2</sub> atmosphere. Thin-layer chromatography (TLC) was performed on silica gel plates (0.2–0.25 mm thickness). Visualization of TLC was achieved by the use of UV light (254 nm). Flash column chromatography was performed on a silica gel (Qingdao Haiyang, 200–300 mesh) column. <sup>1</sup>H and <sup>13</sup>C NMR spectra were recorded on a JEOL ECZ 400 MHz or 600 MHz spectrometer. The chemical shift (δ) values are given in ppm and are referenced to TMS or residual solvent peaks. Chemical shifts of <sup>19</sup>F NMR are referred to CFC<sub>3</sub> (δ = 0). Infrared spectra were obtained on a Nicolet AVATAR 360 FT-IR spectrometer. Melting points were measured on a WRX-4 (Shanghai Yice) micro melting point apparatus. Mass spectra were obtained on an AB Sciex TripleTOF 5600+ mass spectrometer. X-ray diffraction experiment was performed on a Rigaku XtaLAB Synergy diffractometer using Cu Kα radiation.

## 2. Optimization of reaction conditions

Table S1 Effect of solvent

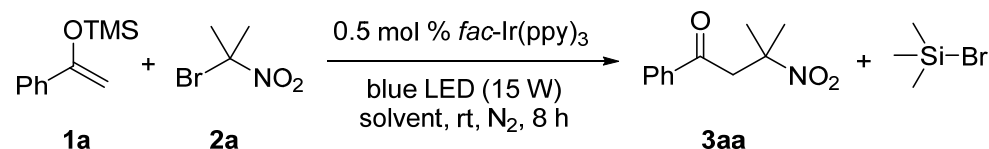

| Entry | 1a equiv | Solvent            | Yield (%) | Entry | 1a equiv | Solvent                         | Yield (%) |
|-------|----------|--------------------|-----------|-------|----------|---------------------------------|-----------|
| 1     |          | CH <sub>3</sub> CN | 91        | 10    |          | 1,4-dioxane                     | 0         |
| 2     |          | DMSO               | 85        | 11    |          | CH <sub>2</sub> Cl <sub>2</sub> | 36        |
| 3     |          | DMF                | 84        | 12    | 1.5      | CHCl <sub>3</sub>               | 36        |
| 4     |          | DMA                | 71        | 13    |          | toluene                         | 35        |
| 5     | 1.5      | acetone            | 46        | 14    | 2.0      |                                 | 98        |
| 6     |          | AcOEt              | 38        | 15    | 1.5      | CH <sub>3</sub> CN              | 91        |
| 7     |          | DME                | 35        | 16    | 1.0      |                                 | 35        |
| 8     |          | THF                | 43        | 17    | 0.5      |                                 | 16        |
| 9     |          | Et <sub>2</sub> O  | 41        |       |          |                                 |           |

Table S2 Effect of photocatalyst

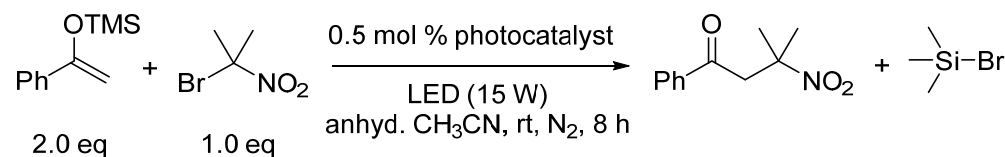

| Entry | Photocatalyst | Visible light (15 W) | Yield (%) |
|-------|---------------|----------------------|-----------|
|-------|---------------|----------------------|-----------|

|   |                                                                       |                |       |
|---|-----------------------------------------------------------------------|----------------|-------|
| 1 | <i>fac</i> -Ir(ppy) <sub>3</sub>                                      |                | 98    |
| 2 | Ir(ppy) <sub>2</sub> (dtbbpy)PF <sub>6</sub>                          |                | 71    |
| 3 | [Ir(dF(CF <sub>3</sub> )ppy) <sub>2</sub> (dtbbpy)](PF <sub>6</sub> ) |                | trace |
| 4 | [Ru(bpy) <sub>2</sub> ]Cl <sub>2</sub> ·6H <sub>2</sub> O             | blue LED belt  | 32    |
| 5 | [Ru(bpy) <sub>2</sub> ]Cl <sub>2</sub>                                |                | 81    |
| 6 | [Ru(bpy) <sub>2</sub> ](PF <sub>6</sub> ) <sub>2</sub>                |                | 78    |
| 7 | NaI / Ph <sub>3</sub> P (10 mol %)                                    |                | 18    |
| 8 | Eosin Y, neutral (10 mol %)                                           | green LED belt | trace |
| 9 | Eosin Y, disodium salt (10 mol %)                                     |                | 22    |

**Figure S1 Effect of leaving group**

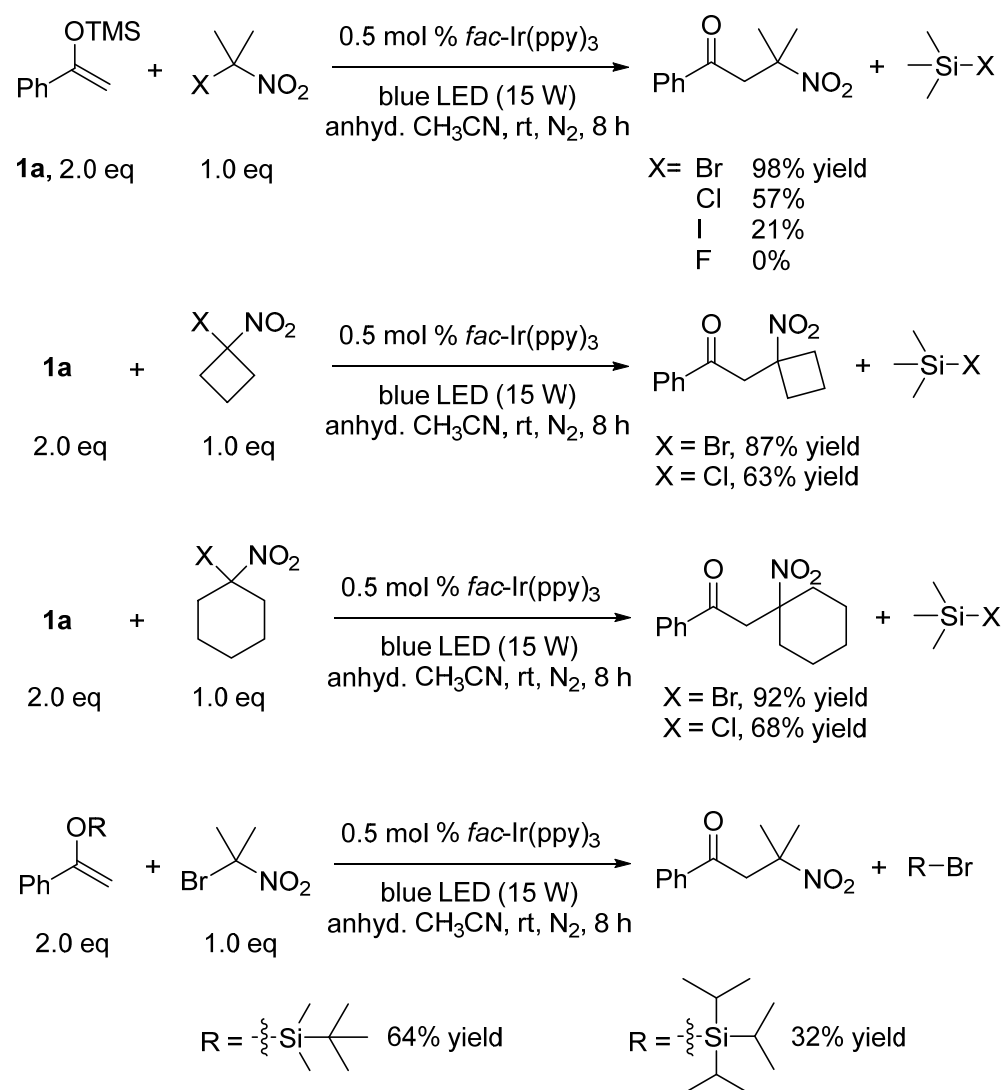

### 3. Preparation of silyl enol ethers

Silyl enol ethers from commercial sources:

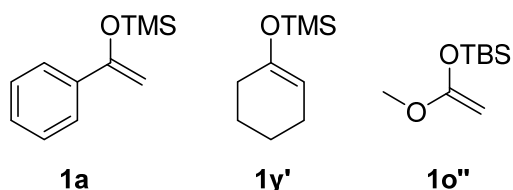

#### 3.1 Preparation of silyl enol ethers

##### General procedure A<sup>1,2</sup>

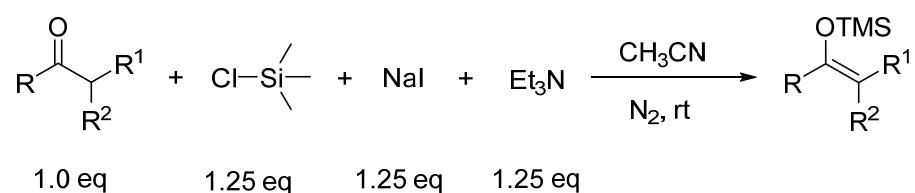

Sodium iodide (1.70 g, 11.3 mmol) in acetonitrile (20 mL) was added at room temperature to a solution of ketone (9.08 mmol), triethylamine (1.90 mL, 11.3 mmol) and chlorotrimethylsilane (1.45 mL, 11.3 mmol) successively introduced to the reaction flask under N<sub>2</sub> atmosphere. This solution was vigorously stirred overnight and the reaction was monitored by TLC. After the reaction was completed, ice-water (50 mL) and cold pentane (50 mL) were successively added. After decantation, the aqueous layer was extracted with pentane (2 × 50 mL). The combined organic layers were dried over Na<sub>2</sub>SO<sub>4</sub> and concentrated under vacuum to give the crude trimethylsilyl enol ether. Repeatedly, high vacuum was shortly applied to remove the volatiles. After determining the purity by NMR analysis, the thus obtained silyl enol ether was used for photocatalytic coupling reaction.

##### General procedure B<sup>3</sup>

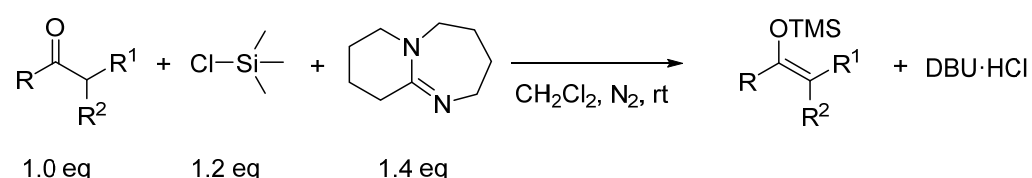

A mixture of ketone (5.0 mmol), chlorotrimethylsilane (0.8 mL, 6.0 mmol) and 1,8-diazabicyclo [5.4.0] undec-7-ene (DBU) (1.0 mL, 7.0 mmol) in dichloromethane (5.0 mL) was stirred at room temperature for 12 h. Then the mixture was diluted with pentane (10.0 mL) and washed with NaHCO<sub>3</sub> solutions and dried over Na<sub>2</sub>SO<sub>4</sub>. Solvent was evaporated to furnish the corresponding silyl enol ether.

##### General procedure C<sup>4</sup>

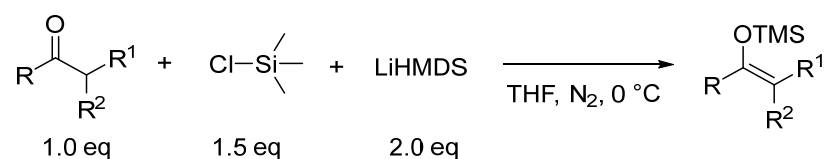

To a solution of LiHMDS (50.0 mL, 1.0 M in THF) was added ketone (25.0 mmol) at 0 °C. After stirring for 30 min at the same temperature, TMSCl (4.8 mL, 37.5 mmol) was added at 0 °C. The mixture was stirred for 45 min at the same temperature before saturated aqueous

NaHCO<sub>3</sub> was added to quench the reaction. The aq. layer was extracted twice with hexanes (150 mL). The combined organic layers were washed with saturated NaHCO<sub>3</sub> solution and brine, dried over Na<sub>2</sub>SO<sub>4</sub>, and concentrated to give a yellow oil.

#### General procedure D<sup>5</sup>

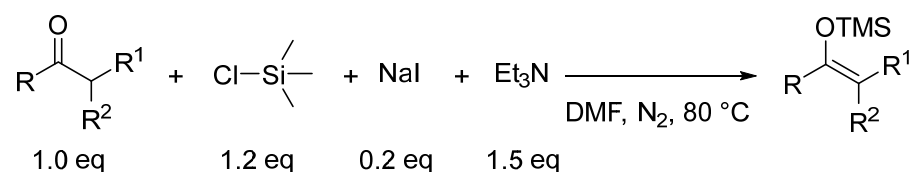

TMSCl (7.5 mL, 60.0 mmol) was added to a stirred solution of ketone (7.0 mL, 50.0 mmol), Et<sub>3</sub>N (10.0 mL, 75.0 mmol) and NaI (1.5 g, 10 mmol) in DMF (30 mL). The solution was stirred at 80 °C under N<sub>2</sub> for 12 h. After cooling to room temperature, cold water (50 mL) was added and the solution was extracted with light petroleum (3 × 50 mL, b.p. 30–40 °C). The combined organic layers were washed with saturated NaHCO<sub>3</sub> (3 × 50 mL) and brine (3 × 50 mL) and evaporated under reduced pressure.

#### General procedure E<sup>6</sup>

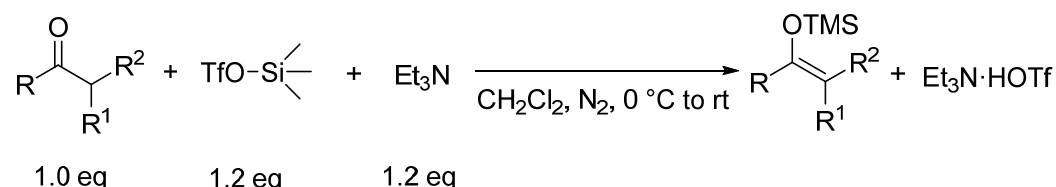

Ketone (5.0 mmol) was added to a flame-dried round-bottom flask at 0 °C under N<sub>2</sub>. Anhydrous dichloromethane (20 mL) was added to the flask, followed by triethylamine (0.85 mL, 6.0 mmol). Then TMSOTf (1.0 mL, 6.0 mmol) was added dropwise via syringe over 10 min. The reaction was stirred overnight at room temperature, which was monitored by TLC. Upon completion, the reaction was quenched with sat. aq. NaHCO<sub>3</sub> and diluted with DCM. The phases were separated and the aqueous layer was extracted with DCM (3 × 15 mL). The combined organic layers were washed with brine, dried over Na<sub>2</sub>SO<sub>4</sub>, and concentrated in vacuum.

### 3.2 Physical data

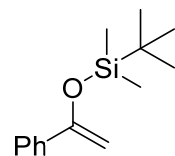

#### *tert*-Butyldimethyl((1-phenylvinyl)oxy)silane<sup>7</sup>

Following general procedure A, *t*-butyldimethylchlorosilane (TBSCl) was used instead of chlorotrimethylsilane (TMSCl).

Yellow oil (1.65 g, 94% yield); R<sub>f</sub> = 0.8 (10:1 hexanes/AcOEt); <sup>1</sup>H NMR (400 MHz, Chloroform-*d*) δ 7.75 – 7.68 (m, 2H), 7.45 – 7.32 (m, 3H), 4.99 (d, *J* = 1.9 Hz, 1H), 4.53 (d, *J* = 1.9 Hz, 1H), 1.27 – 0.83 (m, 9H), 0.32 (d, *J* = 2.5 Hz, 6H); <sup>13</sup>C NMR (151 MHz, Chloroform-*d*) δ 155.98, 137.80, 128.13, 128.02, 125.26, 90.86, 25.84, 18.31, –4.65.

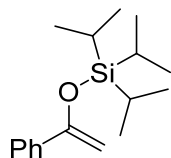

**Triisopropyl((1-phenylvinyl)oxy)silane<sup>8</sup>**

Following general procedure E, TIPSOTf was used instead of TMSOTf.

Yellow oil (1.5 g, 90% yield);  $R_f = 0.8$  (10:1 hexanes/AcOEt);  $^1\text{H NMR}$  (600 MHz, Chloroform-*d*)  $\delta$  7.75 (dt,  $J = 7.3, 2.5$  Hz, 2H), 7.42 – 7.33 (m, 3H), 4.95 (dd,  $J = 3.6, 1.9$  Hz, 1H), 4.56 – 4.44 (m, 1H), 1.39 (dd,  $J = 7.6, 3.5$  Hz, 3H), 1.25 – 1.21 (m, 18H);  $^{13}\text{C NMR}$  (101 MHz, Chloroform-*d*)  $\delta$  156.16, 137.91, 128.06, 128.00, 125.28, 89.89, 18.08, 12.79.

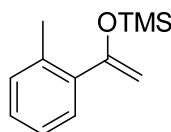

**Trimethyl((1-(*o*-tolyl)vinyl)oxy)silane (1b)<sup>9</sup>**

Following general procedure A.

Yellow oil (1.4 g, 75% yield);  $R_f = 0.8$  (10:1 hexanes/AcOEt);  $^1\text{H NMR}$  (600 MHz, Chloroform-*d*)  $\delta$  7.36 (d,  $J = 7.4$  Hz, 1H), 7.26 – 7.05 (m, 3H), 4.59 (s, 1H), 4.45 (s, 1H), 2.44 (s, 3H), 0.24 (s, 9H);  $^{13}\text{C NMR}$  (151 MHz, Chloroform-*d*)  $\delta$  157.80, 138.96, 135.79, 130.31, 128.67, 127.99, 125.35, 94.83, 20.43, 0.02.

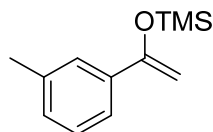

**Trimethyl((1-(*m*-tolyl)vinyl)oxy)silane (1c)**

Following general procedure A.

Yellow oil (1.7 g, 92% yield);  $R_f = 0.8$  (10:1 hexanes/AcOEt);  $^1\text{H NMR}$  (600 MHz, Chloroform-*d*)  $\delta$  7.52 (d,  $J = 8.3$  Hz, 2H), 7.32 (td,  $J = 7.6, 2.9$  Hz, 1H), 7.20 (d,  $J = 6.8$  Hz, 1H), 5.12 – 4.85 (m, 1H), 4.57 – 4.44 (m, 1H), 2.46 (d,  $J = 2.9$  Hz, 3H), 0.39 (d,  $J = 4.0$  Hz, 9H);  $^{13}\text{C NMR}$  (151 MHz, Chloroform-*d*)  $\delta$  155.79, 137.45, 128.94, 127.94, 125.84, 122.39, 90.88, 21.43, 0.22.

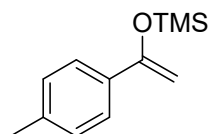

**Trimethyl((1-(*p*-tolyl)vinyl)oxy)silane (1d)<sup>10,11</sup>**

Following general procedure A.

Yellow oil (1.8 g, 96% yield);  $R_f = 0.8$  (10:1 hexanes/AcOEt);  $^1\text{H NMR}$  (600 MHz, Chloroform-*d*)  $\delta$  7.56 (d,  $J = 8.2$  Hz, 2H), 7.19 (d,  $J = 8.0$  Hz, 2H), 4.95 (d,  $J = 1.7$  Hz, 1H), 4.46 (d,  $J = 1.9$  Hz, 1H), 2.41 (s, 3H), 0.34 (s, 9H);  $^{13}\text{C NMR}$  (151 MHz, Chloroform-*d*)  $\delta$  155.71, 137.97, 134.76, 128.73, 125.13, 90.31, 21.11, 0.05.

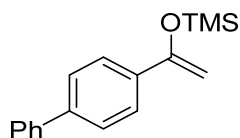

**((1-((1,1'-Biphenyl)-4-yl)vinyl)oxy)trimethylsilane (1e)<sup>11</sup>**

Following general procedure A.

Yellow oil (1.9 g, 78% yield);  $R_f = 0.7$  (10:1 hexanes/AcOEt);  $^1\text{H NMR}$  (400 MHz, Chloroform-*d*)  $\delta$  7.84 – 7.61 (m, 6H), 7.52 (d,  $J = 7.8$  Hz, 2H), 7.48 – 7.39 (m, 1H), 5.09 (d,  $J = 1.8$  Hz, 1H), 4.59 (d,  $J = 1.8$  Hz, 1H), 0.42 (d,  $J = 2.1$  Hz, 9H);  $^{13}\text{C NMR}$  (101 MHz, Chloroform-*d*)  $\delta$  155.30, 140.88, 140.60, 136.41, 128.72, 127.28, 126.92, 126.72, 125.59, 91.07, 0.06.

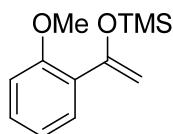

**((1-(2-Methoxyphenyl)vinyl)oxy)trimethylsilane (1f)<sup>12</sup>**

Following general procedure A.

Yellow oil (1.76 g, 87% yield);  $R_f = 0.8$  (10:1 hexanes/AcOEt);  $^1\text{H NMR}$  (600 MHz, Chloroform-*d*)  $\delta$  7.59 (d,  $J = 8.5$  Hz, 1H), 7.31 (s, 1H), 7.00 (s, 1H), 6.93 (d,  $J = 8.2$  Hz, 1H), 5.11 (s, 1H), 4.74 (s, 1H), 3.89 (s, 3H), 0.31 (s, 9H);  $^{13}\text{C NMR}$  (151 MHz, Chloroform-*d*)  $\delta$  157.02, 153.00, 129.05, 128.97, 126.84, 120.06, 110.95, 96.46, 55.16, 0.04.

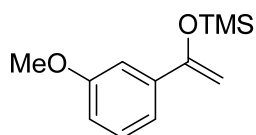

**((1-(3-Methoxyphenyl)vinyl)oxy)trimethylsilane (1g)<sup>10</sup>**

Following general procedure A.

Yellow oil (1.5 g, 73% yield);  $R_f = 0.8$  (10:1 hexanes/AcOEt);  $^1\text{H NMR}$  (400 MHz, Chloroform-*d*)  $\delta$  7.27 (s, 1H), 7.24 (d,  $J = 1.5$  Hz, 1H), 7.20 (s, 1H), 6.87 (d,  $J = 7.6$  Hz, 1H), 4.96 (d,  $J = 1.6$  Hz, 1H), 4.48 (d,  $J = 1.6$  Hz, 1H), 3.84 (s, 3H), 0.32 (d,  $J = 1.4$  Hz, 9H);  $^{13}\text{C NMR}$  (101 MHz, Chloroform-*d*)  $\delta$  159.41, 155.36, 138.99, 128.96, 117.72, 113.53, 110.91, 91.32, 55.03, 0.03.

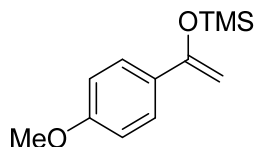

**((1-(4-Methoxyphenyl)vinyl)oxy)trimethylsilane (1h)**

Following general procedure A.

Yellow oil (1.5 g, 76% yield);  $R_f = 0.8$  (10:1 hexanes/AcOEt);  $^1\text{H NMR}$  (400 MHz, Chloroform-*d*)  $\delta$  7.87 – 7.29 (m, 2H), 6.90 (d,  $J = 8.8$  Hz, 2H), 4.86 (s, 1H), 4.40 (s, 1H), 3.83 (s, 3H), 0.33 (d,  $J = 2.5$  Hz, 9H);  $^{13}\text{C NMR}$  (151 MHz, Chloroform-*d*)  $\delta$  159.69, 155.38, 130.16, 126.48, 113.33, 89.30, 55.09, 0.00.



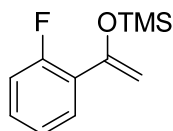

**((1-(2-Fluorophenyl)vinyl)oxy)trimethylsilane (1i)**<sup>13</sup>

Following general procedure A.

Yellow oil (1.6 g, 84% yield);  $R_f = 0.8$  (10:1 hexanes/AcOEt);  $^1\text{H NMR}$  (600 MHz, Chloroform-*d*)  $\delta$  7.64 – 7.48 (m, 1H), 7.31 – 7.15 (m, 1H), 7.12 (t,  $J = 7.6$  Hz, 1H), 7.05 (dd,  $J = 11.7, 8.2$  Hz, 1H), 5.04 (s, 1H), 4.71 (s, 1H), 0.27 (s, 9H);  $^{13}\text{C NMR}$  (151 MHz, Chloroform-*d*)  $\delta$  160.93, 159.27, 150.41, 129.40, 128.80, 116.01, 97.22, 97.15, 0.22.

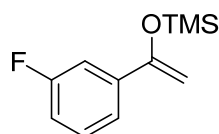

**((1-(3-Fluorophenyl)vinyl)oxy)trimethylsilane (1j)**<sup>14</sup>

Following general procedure A.

Yellow oil (1.4 g, 76% yield);  $R_f = 0.8$  (10:1 hexanes/AcOEt);  $^1\text{H NMR}$  (600 MHz, Chloroform-*d*)  $\delta$  7.41 (dd,  $J = 7.8, 1.0$  Hz, 1H), 7.37 – 7.19 (m, 2H), 7.00 (td,  $J = 8.3, 2.7$  Hz, 1H), 4.97 (d,  $J = 1.8$  Hz, 1H), 4.51 (t,  $J = 1.8$  Hz, 1H), 0.32 (d,  $J = 1.7$  Hz, 9H);  $^{13}\text{C NMR}$  (151 MHz, Chloroform-*d*)  $\delta$  163.66, 162.04, 154.47, 129.48, 120.78, 114.83, 112.25, 91.80, 0.13.

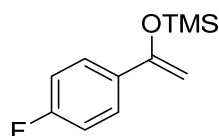

**((1-(4-Fluorophenyl)vinyl)oxy)trimethylsilane (1k)**<sup>9</sup>

Following general procedure A.

Yellow oil (1.5 g, 82% yield);  $R_f = 0.8$  (10:1 hexanes/AcOEt);  $^1\text{H NMR}$  (600 MHz, Chloroform-*d*)  $\delta$  7.59 (dd,  $J = 7.7, 5.5$  Hz, 2H), 7.05 – 6.99 (m, 2H), 4.86 (s, 1H), 4.43 (s, 1H), 0.30 (s, 9H);  $^{13}\text{C NMR}$  (151 MHz, Chloroform-*d*)  $\delta$  164.04, 161.58, 154.79, 133.72, 133.68, 127.00, 126.92, 114.95, 114.7, 90.54, -0.01.

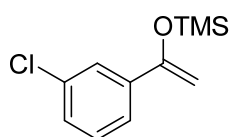

**((1-(3-Chlorophenyl)vinyl)oxy)trimethylsilane (1l)**<sup>15</sup>

Following general procedure A.

Yellow oil (1.4 g, 70% yield);  $R_f = 0.8$  (10:1 hexanes/AcOEt);  $^1\text{H NMR}$  (400 MHz, Chloroform-*d*)  $\delta$  7.60 (s, 1H), 7.49 (dt,  $J = 6.5, 1.8$  Hz, 1H), 7.32 – 7.22 (m, 2H), 4.94 (d,  $J = 1.9$  Hz, 1H), 4.48 (d,  $J = 1.9$  Hz, 1H), 0.30 (d,  $J = 1.3$  Hz, 9H);  $^{13}\text{C NMR}$  (101 MHz, Chloroform-*d*)  $\delta$  154.28, 139.39, 134.09, 129.24, 128.30, 125.32, 123.27, 91.84, -0.05.

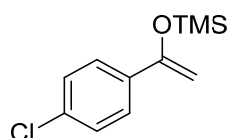

**((1-(4-Chlorophenyl)vinyl)oxy)trimethylsilane (1m)<sup>9,10</sup>**

Following general procedure A.

Yellow oil (1.2 g, 75% yield);  $R_f = 0.8$  (10:1 hexanes/AcOEt);  $^1\text{H NMR}$  (400 MHz, Chloroform-*d*)  $\delta$  7.53 (dd,  $J = 8.6, 1.6$  Hz, 2H), 7.30 (dt,  $J = 9.4, 2.2$  Hz, 2H), 4.91 (t,  $J = 1.7$  Hz, 1H), 4.46 (d,  $J = 1.7$  Hz, 1H), 0.39 – 0.23 (m, 9H);  $^{13}\text{C NMR}$  (101 MHz, Chloroform-*d*)  $\delta$  154.62, 136.00, 133.96, 128.19, 126.50, 91.34, 0.00.

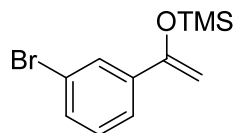

**((1-(3-Bromophenyl)vinyl)oxy)trimethylsilane (1n)<sup>10</sup>**

Following general procedure A.

Yellow oil (2.0 g, 81% yield);  $R_f = 0.8$  (10:1 hexanes/AcOEt);  $^1\text{H NMR}$  (400 MHz, Chloroform-*d*)  $\delta$  7.73 (d,  $J = 1.8$  Hz, 1H), 7.52 (m,  $J = 7.9, 1.8, 1.0$  Hz, 1H), 7.41 (m,  $J = 8.0, 2.1, 1.1$  Hz, 1H), 7.19 (s, 1H), 4.92 (d,  $J = 2.0$  Hz, 1H), 4.47 (d,  $J = 1.9$  Hz, 1H), 0.29 (d,  $J = 1.1$  Hz, 9H);  $^{13}\text{C NMR}$  (101 MHz, Chloroform-*d*)  $\delta$  154.16, 139.62, 131.02, 129.52, 128.26, 123.72, 122.34, 91.87, -0.28.

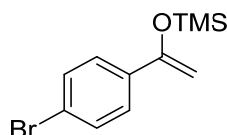

**((1-(4-Bromophenyl)vinyl)oxy)trimethylsilane (1o)<sup>9</sup>**

Following general procedure A.

Yellow oil (2.1 g, 84% yield);  $R_f = 0.8$  (10:1 hexanes/AcOEt);  $^1\text{H NMR}$  (600 MHz, Chloroform-*d*)  $\delta$  7.61 – 7.31 (m, 4H), 4.93 (d,  $J = 1.9$  Hz, 1H), 4.48 (t,  $J = 1.8$  Hz, 1H), 0.30 (d,  $J = 2.9$  Hz, 9H);  $^{13}\text{C NMR}$  (151 MHz, Chloroform-*d*)  $\delta$  154.66, 136.45, 131.14, 126.79, 122.21, 91.41, 0.00.

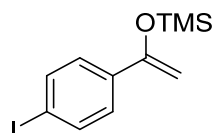

**((1-(4-Iodophenyl)vinyl)oxy)trimethylsilane (1p)<sup>9</sup>**

Following general procedure A.

Yellow oil (2.5 g, 86% yield);  $R_f = 0.8$  (10:1 hexanes/AcOEt);  $^1\text{H NMR}$  (400 MHz, Chloroform-*d*)  $\delta$  7.66 (d,  $J = 8.7$  Hz, 2H), 7.34 (d,  $J = 8.6$  Hz, 2H), 4.93 (d,  $J = 1.5$  Hz, 1H), 4.46 (d,  $J = 1.6$  Hz, 1H), 0.29 (d,  $J = 1.6$  Hz, 9H);  $^{13}\text{C NMR}$  (101 MHz, Chloroform-*d*)  $\delta$  154.71, 137.12, 137.04, 126.98, 93.93, 91.54, 0.03.

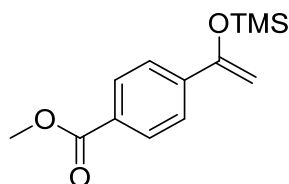

**Methyl 4-((1-((trimethylsilyl)oxy)vinyl)benzoate (1q)**

Following general procedure A.

Yellow oil (1.9 g, 84% yield);  $R_f = 0.7$  (10:1 hexanes/AcOEt);  $^1\text{H NMR}$  (600 MHz, Chloroform-*d*)  $\delta$  7.97 (d,  $J = 8.5$  Hz, 2H), 7.62 (d,  $J = 8.6$  Hz, 2H), 4.99 (s, 1H), 4.50 (s, 1H), 3.86 (s, 3H), 0.25 (d,  $J = 1.7$  Hz, 9H);  $^{13}\text{C NMR}$  (151 MHz, Chloroform-*d*)  $\delta$  166.55, 154.60, 141.67, 129.53, 129.29, 124.90, 92.88, 51.78,  $-0.19$ .

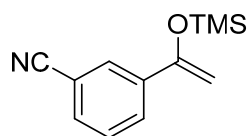

### 3-(1-((Trimethylsilyloxy)vinyl)benzonitrile (1r)

Following general procedure A.

Yellow oil (1.3 g, 65% yield);  $R_f = 0.8$  (10:1 hexanes/AcOEt);  $^1\text{H NMR}$  (600 MHz, Chloroform-*d*)  $\delta$  7.79 (s, 1H), 7.75 (d,  $J = 8.0$  Hz, 1H), 7.49 (d,  $J = 7.7$  Hz, 1H), 7.36 (t,  $J = 7.9$  Hz, 1H), 4.91 (s, 1H), 4.46 (s, 1H), 0.24 (s, 9H);  $^{13}\text{C NMR}$  (151 MHz, Chloroform-*d*)  $\delta$  153.19, 138.46, 131.13, 129.01, 128.65, 128.43, 118.47, 112.07, 92.09,  $-0.36$ .

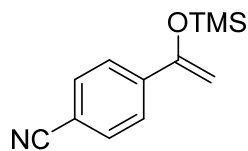

### 4-(1-((Trimethylsilyloxy)vinyl)benzonitrile (1s)<sup>13</sup>

Following general procedure A.

Yellow oil (1.5 g, 78% yield);  $R_f = 0.8$  (10:1 hexanes/AcOEt);  $^1\text{H NMR}$  (600 MHz, Chloroform-*d*)  $\delta$  7.66 (d,  $J = 8.6$  Hz, 2H), 7.59 (d,  $J = 8.9$  Hz, 2H), 5.01 (d,  $J = 2.2$  Hz, 1H), 4.56 (d,  $J = 2.2$  Hz, 1H), 0.27 (s, 9H);  $^{13}\text{C NMR}$  (151 MHz, Chloroform-*d*)  $\delta$  153.82, 141.73, 132.40, 131.86, 128.60, 125.59, 93.64,  $-0.12$ .

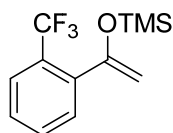

### Trimethyl((1-(2-(trifluoromethyl)phenyl)vinyl)oxy)silane (1t)

Following general procedure A.

Dark oil (1.7 g, 72% yield);  $R_f = 0.8$  (10:1 hexanes/AcOEt);  $^1\text{H NMR}$  (600 MHz, Chloroform-*d*)  $\delta$  7.69 (d,  $J = 7.9$  Hz, 1H), 7.52 (dd,  $J = 16.2, 7.6$  Hz, 2H), 7.42 (t,  $J = 7.6$  Hz, 1H), 4.60 – 4.48 (m, 2H), 0.29 (s, 9H);  $^{13}\text{C NMR}$  (151 MHz, Chloroform-*d*)  $\delta$  156.01, 138.53, 131.59, 130.77, 128.17, 126.41, 125.03, 123.21, 94.44,  $-0.30$ .

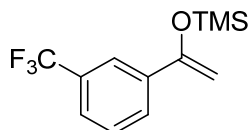

### Trimethyl((1-(3-(trifluoromethyl)phenyl)vinyl)oxy)silane (1u)

Following general procedure A.

Yellow oil (1.5 g, 65% yield);  $R_f = 0.8$  (10:1 hexanes/AcOEt);  $^1\text{H NMR}$  (600 MHz, Chloroform-*d*)  $\delta$  7.87 (s, 1H), 7.78 (d,  $J = 7.9$  Hz, 1H), 7.55 (d,  $J = 6.7$  Hz, 1H), 7.44 (t,  $J = 7.8$  Hz, 1H), 5.00 (s, 1H), 4.54 (s, 1H), 0.30 (s, 9H);  $^{13}\text{C NMR}$  (151 MHz, Chloroform-*d*)  $\delta$  154.26, 138.35,

131.02, 130.71, 130.39, 130.07, 128.53, 128.32, 125.51, 124.74, 124.70, 122.80, 121.96, 121.92, 92.05, -0.30.

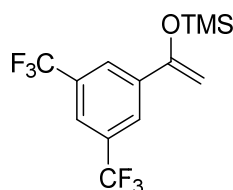

**((1-(3,5-Bis(trifluoromethyl)phenyl)vinyl)oxy)trimethylsilane (1v)**

Following general procedure A.

Dark oil (2.3 g, 76% yield);  $R_f = 0.8$  (10:1 hexanes/AcOEt);  $^1\text{H NMR}$  (600 MHz, Chloroform-*d*)  $\delta$  8.03 (s, 2H), 7.79 (s, 1H), 5.06 (d,  $J = 2.5$  Hz, 1H), 4.62 (d,  $J = 2.5$  Hz, 1H), 0.31 (s, 9H);  $^{13}\text{C NMR}$  (151 MHz, Chloroform-*d*)  $\delta$   $^{13}\text{C NMR}$  (101 MHz, Chloroform-*d*)  $\delta$  153.10, 139.80, 131.67 (q,  $J = 33.3$  Hz), 127.53, 125.23, 124.82, 122.11, 121.72, 121.65, 119.40, 93.21, -0.18.

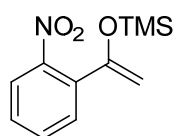

**Trimethyl((1-(2-nitrophenyl)vinyl)oxy)silane (1w)**

Following general procedure A.

Dark oil (1.2 g, 57% yield);  $R_f = 0.65$  (10:1 hexanes/AcOEt);  $^1\text{H NMR}$  (400 MHz, Chloroform-*d*)  $\delta$  7.63 – 7.55 (m, 1H), 7.55 – 7.44 (m, 2H), 7.46 – 7.32 (m, 1H), 4.66 (d,  $J = 2.2$  Hz, 1H), 4.49 (d,  $J = 2.2$  Hz, 1H), 0.21 (d,  $J = 1.1$  Hz, 9H);  $^{13}\text{C NMR}$  (101 MHz, Chloroform-*d*)  $\delta$  153.70, 133.21, 131.60, 129.98, 128.79, 123.38, 93.85, 7.06, -0.82.

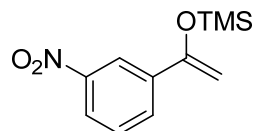

**Trimethyl((1-(3-nitrophenyl)vinyl)oxy)silane (1x)<sup>10</sup>**

Following general procedure A.

Yellow oil (1.5 g, 72% yield);  $R_f = 0.7$  (10:1 hexanes/AcOEt);  $^1\text{H NMR}$  (600 MHz, Chloroform-*d*)  $\delta$  8.40 (s, 1H), 8.13 – 8.08 (m, 1H), 7.89 (d,  $J = 7.8$  Hz, 1H), 7.47 (t,  $J = 8.0$  Hz, 1H), 5.02 (d,  $J = 2.4$  Hz, 1H), 4.55 (d,  $J = 2.4$  Hz, 1H), 0.29 (s, 9H);  $^{13}\text{C NMR}$  (151 MHz, Chloroform-*d*)  $\delta$  153.34, 148.28, 139.29, 129.81, 128.97, 122.72, 120.01, 92.71, -0.11.

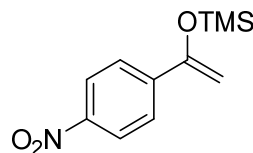

**Trimethyl((1-(4-nitrophenyl)vinyl)oxy)silane (1y)<sup>16</sup>**

Following general procedure A.

Yellow oil (1.74 g, 81% yield);  $R_f = 0.7$  (10:1 hexanes/AcOEt);  $^1\text{H NMR}$  (400 MHz, Chloroform-*d*)  $\delta$  8.15 (d,  $J = 8.1$  Hz, 2H), 7.71 (d,  $J = 8.5$  Hz, 2H), 5.07 (d,  $J = 2.3$  Hz, 1H), 4.61 (d,  $J = 2.3$  Hz, 1H), 0.28 (s, 9H);  $^{13}\text{C NMR}$  (101 MHz, Chloroform-*d*)  $\delta$  153.57, 147.36, 143.57, 125.73, 123.28, 94.34, -0.81.

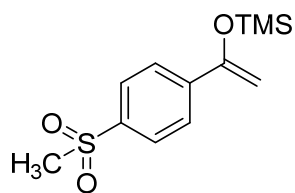

**Trimethyl((1-(4-(methylsulfonyl)phenyl)vinyl)oxy)silane (1z)<sup>11</sup>**

Following general procedure A.

Yellow oil (2.1 g, 87% yield);  $R_f = 0.7$  (10:1 hexanes/AcOEt);  $^1\text{H NMR}$  (400 MHz, Chloroform-*d*)  $\delta$  7.83 (d,  $J = 8.6$  Hz, 2H), 7.71 (d,  $J = 8.6$  Hz, 2H), 5.00 (d,  $J = 2.3$  Hz, 1H), 4.53 (s, 1H), 2.99 (s, 3H), 0.22 (s, 9H);  $^{13}\text{C NMR}$  (101 MHz, Chloroform-*d*)  $\delta$  153.65, 142.52, 139.57, 127.04, 125.70, 93.74, 44.22, -0.23.

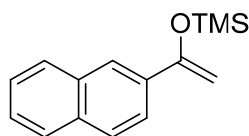

**Trimethyl((1-(naphthalen-2-yl)vinyl)oxy)silane (1a')<sup>9</sup>**

Following general procedure A.

Yellow oil (1.6 g, 71% yield);  $R_f = 0.7$  (10:1 hexanes/AcOEt);  $^1\text{H NMR}$  (600 MHz, Chloroform-*d*)  $\delta$  8.16 (s, 1H), 7.96 – 7.75 (m, 4H), 7.53 (s, 2H), 5.18 – 5.14 (m, 1H), 4.66 – 4.63 (m, 1H), 0.41 (d,  $J = 4.0$  Hz, 9H);  $^{13}\text{C NMR}$  (151 MHz, Chloroform-*d*)  $\delta$  155.59, 134.76, 133.26, 133.18, 128.48, 127.61, 127.50, 126.09, 126.07, 124.24, 123.33, 91.88, 0.11.

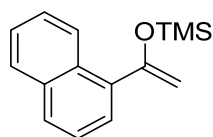

**Trimethyl((1-(naphthalen-1-yl)vinyl)oxy)silane (1b')<sup>9</sup>**

Following general procedure A.

Yellow oil (2.1 g, 98% yield);  $R_f = 0.7$  (10:1 hexanes/AcOEt);  $^1\text{H NMR}$  (600 MHz, Chloroform-*d*)  $\delta$  8.49 (s, 1H), 7.95 – 7.89 (m, 2H), 7.71 – 7.49 (m, 4H), 4.97 – 4.70 (m, 2H), 0.29 (dd,  $J = 8.8, 4.5$  Hz, 9H);  $^{13}\text{C NMR}$  (151 MHz, Chloroform-*d*)  $\delta$  156.99, 137.30, 133.66, 131.00, 128.63, 128.12, 126.24, 126.13, 125.92, 125.68, 125.00, 96.62, 0.12.

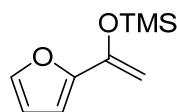

**((1-(Furan-2-yl)vinyl)oxy)trimethylsilane (1c')<sup>10</sup>**

Following general procedure A.

Yellow oil (1.4 g, 84% yield);  $R_f = 0.7$  (10:1 hexanes/AcOEt);  $^1\text{H NMR}$  (400 MHz, Chloroform-*d*)  $\delta$  7.34 (s, 1H), 6.45 – 6.33 (m, 2H), 4.91 (d,  $J = 1.5$  Hz, 1H), 4.39 (d,  $J = 1.6$  Hz, 1H), 0.28 (s, 9H);  $^{13}\text{C NMR}$  (101 MHz, Chloroform-*d*)  $\delta$  152.14, 147.55, 142.29, 111.03, 106.95, 90.27, -0.33.

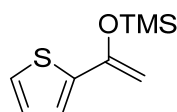

**Trimethyl((1-(thiophen-2-yl)vinyl)oxy)silane (1d')<sup>10</sup>**

Following general procedure A.

Yellow oil (1.3 g, 73% yield);  $R_f = 0.7$  (10:1 hexanes/AcOEt);  $^1\text{H NMR}$  (400 MHz, Chloroform-*d*)  $\delta$  7.19 (t,  $J = 4.5$  Hz, 2H), 6.97 (dd,  $J = 5.0, 3.7$  Hz, 1H), 4.84 (d,  $J = 1.9$  Hz, 1H), 4.35 (d,  $J = 1.8$  Hz, 1H), 0.31 (s, 9H);  $^{13}\text{C NMR}$  (151 MHz, Chloroform-*d*)  $\delta$  150.85, 142.61, 127.18, 124.92, 123.80, 90.15, 0.002.

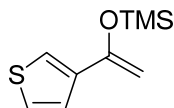

#### Trimethyl((1-(thiophen-3-yl)vinyl)oxy)silane (**1e'**)

Following general procedure A.

Yellow oil (1.5 g, 82% yield);  $R_f = 0.7$  (10:1 hexanes/AcOEt);  $^1\text{H NMR}$  (600 MHz, Chloroform-*d*)  $\delta$  7.41 – 7.40 (m, 1H), 7.26 – 7.23 (m, 2H), 4.80 (s, 1H), 4.42 (d,  $J = 0.9$  Hz, 1H), 0.31 (s, 9H);  $^{13}\text{C NMR}$  (151 MHz, Chloroform-*d*)  $\delta$  152.12, 140.37, 126.30, 125.21, 121.75, 90.76, 0.04.

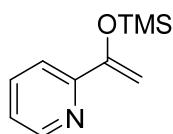

#### 2-(1-((Trimethylsilyl)oxy)vinyl)pyridine (**1f'**)<sup>10</sup>

Following general procedure A.

Yellow oil (1.2 g, 71% yield);  $R_f = 0.7$  (10:1 hexanes/AcOEt);  $^1\text{H NMR}$  (400 MHz, Chloroform-*d*)  $\delta$  8.47 (s, 1H), 7.60 (d,  $J = 11.3$  Hz, 2H), 7.09 (t,  $J = 4.4$  Hz, 1H), 5.61 (s, 1H), 4.51 (d,  $J = 2.9$  Hz, 1H), 0.23 (d,  $J = 3.4$  Hz, 9H);  $^{13}\text{C NMR}$  (101 MHz, Chloroform-*d*)  $\delta$  148.79, 136.61, 136.33, 126.88, 122.67, 118.86, 93.27, -0.14.

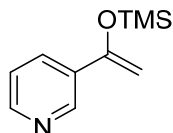

#### 3-(1-((Trimethylsilyl)oxy)vinyl)pyridine (**1g'**)<sup>17</sup>

Following general procedure A.

Brown oil (1.2 g, 72% yield);  $R_f = 0.7$  (10:1 hexanes/AcOEt);  $^1\text{H NMR}$  (600 MHz, Chloroform-*d*)  $\delta$  8.51 (d,  $J = 1.8$  Hz, 1H), 7.63 (t,  $J = 6.2$  Hz, 1H), 7.57 (d,  $J = 7.9$  Hz, 1H), 7.16 – 7.07 (m, 1H), 5.64 (s, 1H), 4.54 (s, 1H), 0.32 – 0.22 (m, 9H);  $^{13}\text{C NMR}$  (151 MHz, Chloroform-*d*)  $\delta$  154.58, 154.27, 148.78, 136.38, 122.71, 118.92, 93.34, -0.08.

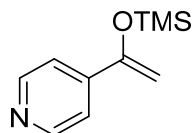

#### 4-(1-((Trimethylsilyl)oxy)vinyl)pyridine (**1h'**)

Following general procedure A.

Yellow oil (1.3 g, 76% yield);  $R_f = 0.7$  (10:1 hexanes/AcOEt);  $^1\text{H NMR}$  (400 MHz, Chloroform-*d*)  $\delta$  8.51 – 8.45 (m, 2H), 7.39 – 7.32 (m, 2H), 5.05 – 4.99 (m, 1H), 4.54 – 4.48 (m, 1H), 0.20 (d,  $J = 2.8$  Hz, 9H);  $^{13}\text{C NMR}$  (101 MHz, Chloroform-*d*)  $\delta$  153.13, 150.76, 149.67, 144.56, 120.98, 93.79, -0.25.

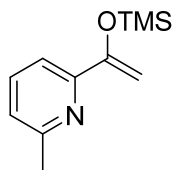

**2-Methyl-6-(1-((trimethylsilyloxy)vinyl)pyridine (1i')**

Following general procedure A.

Yellow oil (1.5 g, 79% yield);  $R_f = 0.7$  (10:1 hexanes/AcOEt);  $^1\text{H NMR}$  (600 MHz, Chloroform-*d*)  $\delta$  7.50 (s, 1H), 7.36 (d,  $J = 7.8$  Hz, 1H), 6.98 (d,  $J = 7.4$  Hz, 1H), 5.65 (s, 1H), 4.51 (s, 1H), 2.49 (s, 3H), 0.24 (s, 9H);  $^{13}\text{C NMR}$  (151 MHz, Chloroform-*d*)  $\delta$  157.41, 154.50, 153.88, 136.45, 122.35, 115.87, 93.19, 24.46, -0.09.

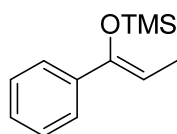

**(Z)-Trimethyl((1-phenylprop-1-en-1-yl)oxy)silane (1j')<sup>10</sup>**

Following general procedure B.

Yellow oil (1.6 g, 87% yield);  $R_f = 0.9$  (10:1 hexanes/AcOEt);  $^1\text{H NMR}$  (600 MHz, Chloroform-*d*)  $\delta$  7.64 – 7.49 (m, 2H), 7.38 – 7.32 (m, 2H), 7.31 – 7.26 (m, 1H), 5.41 (dd,  $J = 6.9, 2.9$  Hz, 1H), 1.83 (dd,  $J = 6.3, 2.8$  Hz, 3H), 0.24 (s, 9H);  $^{13}\text{C NMR}$  (151 MHz, Chloroform-*d*)  $\delta$  149.90, 139.20, 127.96, 125.16, 105.19, 29.72, 11.61, 0.51.

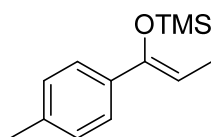

**(Z)-Trimethyl((1-(p-tolyl)prop-1-en-1-yl)oxy)silane (1k')**

Following general procedure B.

Yellow oil (1.7 g, 86% yield);  $R_f = 0.7$  (10:1 hexanes/AcOEt);  $^1\text{H NMR}$  (600 MHz, Chloroform-*d*)  $\delta$  7.44 – 7.41 (m, 2H), 7.16 (d,  $J = 7.9$  Hz, 2H), 5.36 (d,  $J = 6.8$  Hz, 1H), 2.39 (s, 3H), 1.81 (dd,  $J = 6.9, 2.2$  Hz, 3H), 0.22 (d,  $J = 2.3$  Hz, 9H);  $^{13}\text{C NMR}$  (101 MHz, Chloroform-*d*)  $\delta$  149.85, 136.91, 136.38, 128.67, 125.08, 104.38, 21.05, 11.58, 0.53.

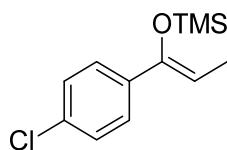

**(Z)-((1-(4-Chlorophenyl)prop-1-en-1-yl)oxy)trimethylsilane (1l')**

Following general procedure B.

Yellow oil (1.8 g, 83% yield);  $R_f = 0.7$  (10:1 hexanes/AcOEt);  $^1\text{H NMR}$  (600 MHz, Chloroform-*d*)  $\delta$  7.40 (d,  $J = 8.8$  Hz, 2H), 7.27 (d,  $J = 8.7$  Hz, 2H), 5.33 (d,  $J = 6.9$  Hz, 1H), 1.75 (d,  $J = 6.9$  Hz, 3H), 0.16 (s, 9H);  $^{13}\text{C NMR}$  (151 MHz, Chloroform-*d*)  $\delta$  148.86, 137.70, 132.91, 128.14, 126.37, 105.83, 11.63, 0.48.

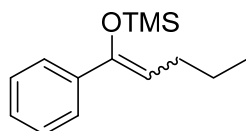

**(Z)-Trimethyl((1-phenylpent-1-en-1-yl)oxy)silane (1m')**<sup>18,19</sup>

Following general procedure E.

Brown oil (982 mg, 84% yield);  $R_f = 0.9$  (20:1 hexanes/AcOEt);  $^1\text{H NMR}$  (400 MHz, Chloroform-*d*)  $\delta$  7.55 (d,  $J = 7.0$  Hz, 2H), 7.34 (d,  $J = 7.8$  Hz, 3H), 5.34 (s, 1H), 2.27 (d,  $J = 7.6$  Hz, 2H), 1.54 (d,  $J = 7.5$  Hz, 2H), 1.05 (s, 3H), 0.24 – 0.18 (m, 9H);  $^{13}\text{C NMR}$  (101 MHz, Chloroform-*d*)  $\delta$  148.97, 139.29, 127.97, 127.27, 125.30, 111.35, 28.30, 22.93, 14.00, 0.51.

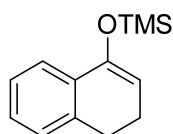

**((3,4-Dihydronaphthalen-1-yl)oxy)trimethylsilane (1n')**

Following general procedure A.

Yellow oil (1.7 g, 85% yield);  $R_f = 0.7$  (10:1 hexanes/AcOEt);  $^1\text{H NMR}$  (400 MHz, Chloroform-*d*)  $\delta$  7.65 (t,  $J = 6.5$  Hz, 1H), 7.42 – 7.23 (m, 3H), 5.39 (q,  $J = 5.0$  Hz, 1H), 2.98 – 2.89 (m, 2H), 2.55 – 2.44 (m, 2H), 0.51 – 0.42 (m, 9H);  $^{13}\text{C NMR}$  (101 MHz, Chloroform-*d*)  $\delta$  148.03, 136.85, 133.40, 127.17, 126.83, 126.05, 121.71, 104.98, 28.07, 22.07, 0.07.

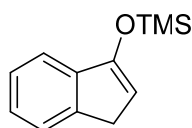

**((1H-Inden-3-yl)oxy)trimethylsilane (1o')**<sup>10</sup>

Following general procedure A.

Yellow oil (1.3 g, 69% yield);  $R_f = 0.7$  (10:1 hexanes/AcOEt);  $^1\text{H NMR}$  (400 MHz, Chloroform-*d*)  $\delta$  7.53 – 7.39 (m, 3H), 7.32 (t,  $J = 7.4$  Hz, 1H), 5.55 (t,  $J = 2.5$  Hz, 1H), 3.38 (d,  $J = 2.4$  Hz, 2H), 0.44 (s, 9H);  $^{13}\text{C NMR}$  (101 MHz, Chloroform-*d*)  $\delta$  153.47, 142.61, 141.73, 125.93, 125.05, 123.66, 118.05, 105.99, 33.84, -0.09.

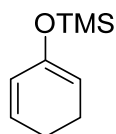

**(Cyclohexa-1,5-dien-1-yloxy)trimethylsilane (1p')**<sup>4</sup>

Following general procedure C.

Yellow oil (3.2 g, 78% yield);  $R_f = 0.8$  (10:1 hexanes/AcOEt);  $^1\text{H NMR}$  (600 MHz, Chloroform-*d*)  $\delta$  5.87 – 5.82 (m, 1H), 5.71 – 5.65 (m, 1H), 4.86 (s, 1H), 2.14 (s, 4H), 0.24 (s, 9H);  $^{13}\text{C NMR}$  (101 MHz, Chloroform-*d*)  $\delta$  128.79, 126.39, 102.32, 35.40, 31.86, 26.88, 22.66, 22.61, 22.55, 21.69, 14.05, 1.87.

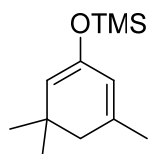



**Trimethyl((3,3,5-trimethylcyclohexa-1,5-dien-1-yl)oxy)silane (1q')**<sup>20</sup>

Following general procedure C.

Yellow oil (4.3 g, 82% yield);  $R_f = 0.8$  (10:1 hexanes/AcOEt);  $^1\text{H NMR}$  (400 MHz, Chloroform-*d*)  $\delta$  5.41 (s, 1H), 4.51 (s, 1H), 1.91 (s, 2H), 1.74 (s, 3H), 0.96 (s, 6H), 0.16 (d,  $J = 3.7$  Hz, 9H);  $^{13}\text{C NMR}$  (151 MHz, Chloroform-*d*)  $\delta$  147.21, 119.88, 111.60, 43.99, 32.27, 28.88, 23.14, 5.41, 2.43.

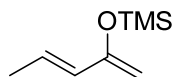**(E)-Trimethyl(penta-1,3-dien-2-yloxy)silane (1r')**<sup>21</sup>

Following general procedure A.

Yellow oil (1.2 g, 84% yield);  $R_f = 0.9$  (10:1 hexanes/AcOEt);  $^1\text{H NMR}$  (400 MHz, Chloroform-*d*)  $\delta$  6.09 – 5.77 (m, 2H), 4.20 (s, 2H), 1.76 (d,  $J = 6.2$  Hz, 3H), 0.23 (s, 9H);  $^{13}\text{C NMR}$  (101 MHz, Chloroform-*d*)  $\delta$  154.88, 129.00, 126.41, 93.63, 17.44, -0.05.

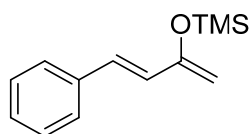**(E)-Trimethyl((4-phenylbuta-1,3-dien-2-yl)oxy)silane (1s')**

Following general procedure B.

Yellow oil (1.0 g, 87% yield);  $R_f = 0.8$  (10:1 hexanes/AcOEt);  $^1\text{H NMR}$  (600 MHz, Chloroform-*d*)  $\delta$  7.60 – 7.47 (m, 2H), 7.46 – 7.39 (m, 2H), 7.34 (d,  $J = 7.4$  Hz, 1H), 6.98 (d,  $J = 3.8$  Hz, 1H), 6.73 (d,  $J = 15.7$  Hz, 1H), 4.60 (d,  $J = 17.6$  Hz, 2H), 0.44 (d,  $J = 2.2$  Hz, 9H);  $^{13}\text{C NMR}$  (101 MHz, Chloroform-*d*)  $\delta$  155.02, 136.75, 129.20, 128.54, 127.62, 126.74, 126.35, 96.90, 0.04.

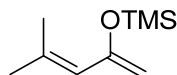**Trimethyl((4-methylpenta-1,3-dien-2-yl)oxy)silane (1t')**<sup>21</sup>

Following general procedure B.

Yellow oil (0.8 g, 89% yield);  $R_f = 0.9$  (10:1 hexanes/AcOEt);  $^1\text{H NMR}$  (600 MHz, Chloroform-*d*)  $\delta$  5.59 (s, 1H), 4.21 (d,  $J = 56.0$  Hz, 2H), 1.92 (s, 3H), 1.77 (s, 3H), 0.23 (s, 9H);  $^{13}\text{C NMR}$  (101 MHz, Chloroform-*d*)  $\delta$  155.56, 122.68, 111.54, 110.20, 94.56, 27.11, 19.34, 0.27.

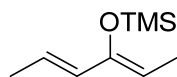**((2Z,4E)-Hexa-2,4-dien-3-yl)oxy)trimethylsilane (1u')**

Following general procedure A.

Yellow oil (1.4 g, 88% yield);  $R_f = 0.9$  (10:1 hexanes/AcOEt);  $^1\text{H NMR}$  (600 MHz, Chloroform-*d*)  $\delta$  5.86 (dd,  $J = 15.3, 1.7$  Hz, 1H), 5.73 (d,  $J = 6.9$  Hz, 1H), 4.72 (q,  $J = 6.9$  Hz, 1H), 1.74 (d,  $J = 6.8$  Hz, 3H), 1.61 (d,  $J = 7.0$  Hz, 3H), 0.20 (s, 9H);  $^{13}\text{C NMR}$  (151 MHz, Chloroform-*d*)  $\delta$  149.36, 129.88, 123.06, 107.10, 17.52, 11.43, 0.36.

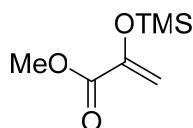

**Methyl 2-((trimethylsilyl)oxy)acrylate (1v')**<sup>22,23</sup>

Following general procedure D, the solvent changed from DMF to CH<sub>2</sub>Cl<sub>2</sub>.

Reddish oil (3.5 g, 80% yield); R<sub>f</sub> = 0.7 (10:1 hexanes/AcOEt); <sup>1</sup>H NMR (600 MHz, Chloroform-*d*) δ 5.44 (s, 1H), 4.82 (s, 1H), 3.71 (s, 3H), 0.18 (s, 9H); <sup>13</sup>C NMR (151 MHz, Chloroform-*d*) δ 164.72, 146.89, 103.84, 51.95, -0.22.

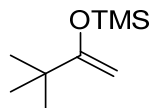**3,3-Dimethylbut-1-en-2-ol (1w')**<sup>9</sup>

Following general procedure A.

Yellow oil (0.7 g, 80% yield); R<sub>f</sub> = 0.9 (10:1 hexanes/AcOEt); <sup>1</sup>H NMR (400 MHz, Chloroform-*d*) δ 4.09 (d, *J* = 1.4 Hz, 1H), 3.93 (d, *J* = 1.4 Hz, 1H), 1.06 (s, 9H), 0.22 (s, 9H); <sup>13</sup>C NMR (101 MHz, Chloroform-*d*) δ 167.10, 85.73, 36.35, 28.03, 0.09.

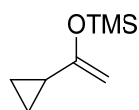**1-Cyclopropylethen-1-ol (1x')**<sup>24,25</sup>

Following general procedure E.

Yellow oil (344 mg, 82% yield); R<sub>f</sub> = 0.9 (10:1 hexanes/AcOEt); <sup>1</sup>H NMR (600 MHz, Chloroform-*d*) δ 4.11 (d, *J* = 0.8 Hz, 1H), 3.98 (s, 1H), 1.48 – 1.32 (m, 1H), 0.55 (m, 4H), 0.17 (s, 9H); <sup>13</sup>C NMR (151 MHz, Chloroform-*d*) δ 159.03, 87.58, 15.46, 4.37, -0.04.

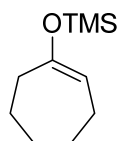**(Cyclohept-1-en-1-yloxy)trimethylsilane (1z')**<sup>6</sup>

Following general procedure A.

Yellow oil (1.5 g, 91% yield); R<sub>f</sub> = 0.9 (10:1 hexanes/AcOEt); <sup>1</sup>H NMR (400 MHz, Chloroform-*d*) δ 5.01 (s, 1H), 2.27 – 2.15 (m, 2H), 1.98 (dt, *J* = 9.3, 4.6 Hz, 2H), 1.72 – 1.52 (m, 6H), 0.16 (s, 9H); <sup>13</sup>C NMR (101 MHz, Chloroform-*d*) δ 156.02, 108.58, 35.52, 31.59, 27.82, 25.36, 25.23, 0.18.

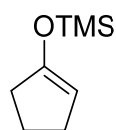**(Cyclopent-1-en-1-yloxy)trimethylsilane (1a'')**<sup>26,27</sup>

Following general procedure A.

Yellow oil (1.2 g, 85% yield); R<sub>f</sub> = 0.9 (10:1 hexanes/AcOEt); <sup>1</sup>H NMR (400 MHz, Chloroform-*d*) δ 4.64 – 4.62 (m, 1H), 2.30 – 2.25 (m, 4H), 1.89 – 1.83 (m, 2H), 0.22 (s, 9H); <sup>13</sup>C NMR (101 MHz, Chloroform-*d*) δ 154.97, 102.02, 33.47, 28.70, 21.28, -0.06.

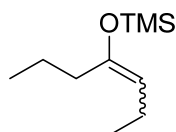

**(Hept-3-en-4-yloxy)trimethylsilane (1b'')**<sup>28</sup>

Following general procedure A.

Yellow oil (1.4 g, 84% yield);  $R_f = 0.8$  (10:1 hexanes/AcOEt);  $^1\text{H NMR}$  (600 MHz, Chloroform-*d*)  $\delta$  4.43 (s, 1H), 1.96 (s, 4H), 1.48 (s, 2H), 0.90 (d,  $J = 13.2$  Hz, 6H), 0.17 (s, 9H);  $^{13}\text{C NMR}$  (151 MHz, Chloroform-*d*)  $\delta$  149.41, 110.39, 38.67, 20.15, 18.64, 14.45, 13.62, 0.51.

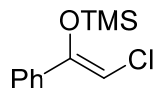

**(Z)-((2-Chloro-1-phenylvinyl)oxy)trimethylsilane (1c'')**<sup>10</sup>

Following general procedure E.

Yellow oil (960 mg, 85% yield);  $R_f = 0.8$  (10:1 hexanes/AcOEt);  $^1\text{H NMR}$  (400 MHz, Chloroform-*d*)  $\delta$  7.51 – 7.47 (m, 2H), 7.35 (dd,  $J = 5.9, 2.2$  Hz, 3H), 5.99 (d,  $J = 2.6$  Hz, 1H), 0.27 (d,  $J = 3.6$  Hz, 9H);  $^{13}\text{C NMR}$  (101 MHz, Chloroform-*d*)  $\delta$  151.39, 136.34, 128.82, 128.60, 128.45, 128.33, 125.28, 99.92, -0.55.

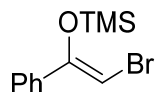

**(Z)-((2-Bromo-1-phenylvinyl)oxy)trimethylsilane (1d'')**<sup>10</sup>

Following general procedure E.

Dark oil (1.2 g, 87% yield);  $R_f = 0.8$  (10:1 hexanes/AcOEt);  $^1\text{H NMR}$  (400 MHz, Chloroform-*d*)  $\delta$  7.52 – 7.45 (m, 2H), 7.38 – 7.32 (m, 3H), 5.97 (s, 1H), 0.26 (d,  $J = 1.2$  Hz, 9H);  $^{13}\text{C NMR}$  (101 MHz, Chloroform-*d*)  $\delta$  153.45, 136.78, 128.67, 128.31, 125.64, 88.28, -0.64.

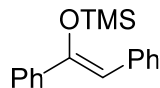

**(Z)-((1,2-Diphenylvinyl)oxy)trimethylsilane (1e'')**<sup>29,5</sup>

Following general procedure D.

Dark oil (4.69 g, 70% yield);  $R_f = 0.6$  (10:1 hexanes/AcOEt);  $^1\text{H NMR}$  (600 MHz, Chloroform-*d*)  $\delta$  7.78 – 7.65 (m, 4H), 7.46 – 7.35 (m, 5H), 7.26 (s, 1H), 6.24 (s, 1H), 0.15 (d,  $J = 1.8$  Hz, 9H);  $^{13}\text{C NMR}$  (151 MHz, Chloroform-*d*)  $\delta$  150.88, 139.66, 136.62, 128.61, 128.11, 128.06, 128.00, 126.14, 126.04, 110.53, 0.65.

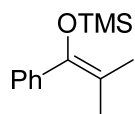

**Trimethyl((2-methyl-1-phenylprop-1-en-1-yl)oxy)silane (1f'')**<sup>6,28</sup>

Following general procedure A.

Yellow oil (1.2 g, 65% yield);  $R_f = 0.75$  (10:1 hexanes/AcOEt);  $^1\text{H NMR}$  (600 MHz, Chloroform-*d*)  $\delta$  7.34 – 7.28 (m, 4H), 7.22 (t,  $J = 7.0$  Hz, 1H), 1.80 (s, 3H), 1.69 (s, 3H), -0.02 (s, 9H);  $^{13}\text{C NMR}$  (151 MHz, Chloroform-*d*)  $\delta$  143.48, 138.97, 129.07, 127.56, 127.00, 112.71, 18.14, 19.63, -0.20.

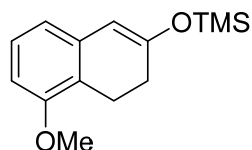

**((5-Methoxy-3,4-dihydronaphthalen-2-yl)oxy)trimethylsilane (1g'')**<sup>30</sup>

$^1\text{H}$  NMR (600 MHz, Chloroform-*d*)  $\delta$  6.86 – 6.52 (m, 3H), 5.71 (s, 1H), 3.83 (s, 3H), 2.58 – 2.50 (m, 2H), 2.38 (t,  $J = 8.5$  Hz, 2H), 0.32 (dd,  $J = 2.1, 1.2$  Hz, 9H).

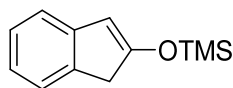

**((1*H*-Inden-2-yl)oxy)trimethylsilane (1h'')**<sup>10</sup>

Following general procedure C.

Dark oil (3.8 g, 75% yield);  $R_f = 0.8$  (10:1 hexanes/AcOEt);  $^1\text{H}$  NMR (400 MHz, Chloroform-*d*)  $\delta$  7.27 (s, 1H), 7.14 – 7.13 (m, 1H), 5.78 (s, 1H), 3.30 (s, 2H), 0.32 (s, 9H).

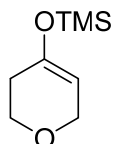

**((3,6-Dihydro-2*H*-pyran-4-yl)oxy)trimethylsilane (1i'')**<sup>10</sup>

Following general procedure A.

Yellow oil (1.4 g, 89% yield);  $R_f = 0.7$  (10:1 hexanes/AcOEt);  $^1\text{H}$  NMR (600 MHz, Chloroform-*d*)  $\delta$  4.74 (s, 1H), 4.05 (d,  $J = 1.8$  Hz, 2H), 3.72 (d,  $J = 5.3$  Hz, 2H), 2.04 (s, 2H), 0.13 (d,  $J = 4.8$  Hz, 9H);  $^{13}\text{C}$  NMR (151 MHz, Chloroform-*d*)  $\delta$  147.61, 136.82, 102.02, 64.42, 30.28, 0.06.

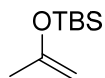

***tert*-Butyldimethyl(prop-1-en-2-yloxy)silane (1j'')**<sup>31,32</sup>

Following general procedure E, TBSOTf was used instead of TMSOTf.

$^1\text{H}$  NMR (600 MHz, Chloroform-*d*)  $\delta$  4.04 (s, 2H), 1.77 (s, 3H), 0.93 (s, 9H), 0.16 (s, 6H);  $^{13}\text{C}$  NMR (151 MHz, Chloroform-*d*)  $\delta$  156.19, 91.20, 25.63, 22.67, 18.02, -4.68.

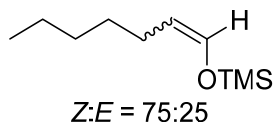

**(Hept-1-en-1-yloxy)trimethylsilane (1k'')**<sup>33</sup>

Following general procedure A.

Yellow oil (1.6 g, 95% yield);  $R_f = 0.9$  (10:1 hexanes/AcOEt);  $^1\text{H}$  NMR (600 MHz, Chloroform-*d*)  $\delta$  6.18 (d,  $J = 12.0$  Hz, 0.26H), 6.13 (d,  $J = 6.6$  Hz, 0.84H), 4.99 (s, 0.32H), 4.48 (d,  $J = 6.1$  Hz, 0.88H), 2.06 (d,  $J = 7.3$  Hz, 2H), 1.87 (d,  $J = 7.2$  Hz, 0.64H), 1.29 (s, 11H), 0.88 (d,  $J = 7.2$  Hz, 5H), 0.17 (d,  $J = 2.4$  Hz, 11H);  $^{13}\text{C}$  NMR (101 MHz, Chloroform-*d*)  $\delta$  139.25, 137.56, 112.15, 111.73, 31.51, 31.24, 30.12, 29.39, 27.31, 23.54, 22.60, 22.53, 22.49, 14.04.

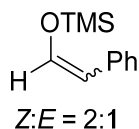

**(*E*)-Trimethyl(styryloxy)silane (1l'')**<sup>34</sup>

Following general procedure D, THF was used instead of DMF as the solvent.

Yellow oil (1.7 g, 89% yield);  $R_f = 0.9$  (10:1 hexanes/AcOEt);  $^1\text{H}$  NMR (400 MHz, Chloroform-*d*)  $\delta$  7.84 (s, 2H), 7.56 – 7.11 (m, 11H), 6.26 (ddd,  $J = 12.3, 9.7, 4.8$  Hz, 0.6H), 5.58 – 5.49 (m,

1H), 0.53 – 0.40 (m, 16H); <sup>13</sup>C NMR (101 MHz, Chloroform-*d*) δ 141.35, 139.55, 136.21, 136.07, 128.37, 128.10, 127.96, 125.69, 125.60, 125.04, 113.16, 109.47, –0.56.

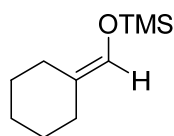

#### (1-Cyclohexylideneethoxy)trimethylsilane (1m'')<sup>35</sup>

Following general procedure A.

Yellow oil (1.5 g, 83% yield); *R*<sub>f</sub> = 0.7 (10:1 hexanes/AcOEt); <sup>1</sup>H NMR (600 MHz, Chloroform-*d*) δ 5.97 (s, 1H), 2.16 (t, *J* = 6.0 Hz, 2H), 1.92 (t, *J* = 5.9 Hz, 2H), 1.52 – 1.44 (m, 6H), 0.14 (s, 9H); <sup>13</sup>C NMR (151 MHz, Chloroform-*d*) δ 130.04, 122.24, 30.51, 28.41, 26.97, 26.90, 25.27, –0.75.

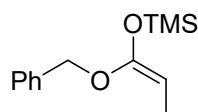

#### (*E*)-((1-(Benzyloxy)prop-1-en-1-yl)oxy)trimethylsilane (1n'')<sup>36</sup>

Following general procedure C, the temperature was controlled at –78 °C.

<sup>1</sup>H NMR (600 MHz, Chloroform-*d*) δ 7.43 – 7.32 (m, 5H), 4.86 (s, 2H), 3.75 (d, *J* = 6.6 Hz, 1H), 1.53 (dd, *J* = 6.6, 1.0 Hz, 3H), 0.28 – 0.20 (m, 9H).

## 4. Preparation of *gem*-bromonitroalkanes

### 4.1 Preparation of oximes<sup>37,38</sup>

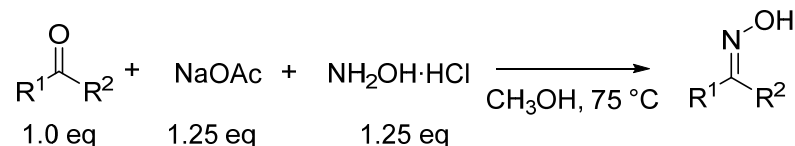

In a round-bottom flask, ketone (50 mmol) was dissolved in CH<sub>3</sub>OH (100 mL) under N<sub>2</sub> atmosphere, then sodium acetate (5.12 g, 62.5 mmol) and hydroxylamine hydrochloride (4.35 g, 62.5 mmol) were added. The solution was heated at 75 °C to reflux and stirred overnight. After cooling to room temperature, methanol was evaporated and H<sub>2</sub>O (50 mL) was added followed by AcOEt (100 mL). Then the organic layer was washed with saturated brine (50 mL), dried over Na<sub>2</sub>SO<sub>4</sub>, and concentrated to give a white solid.

### 4.2 Preparation of nitro compounds

#### 2-Nitrobutane

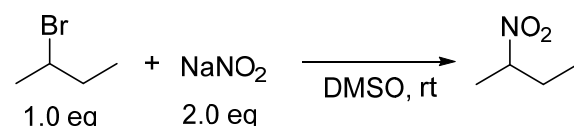

2-Bromobutane (5.5 mL, 40 mmol) was added to a stirred mixture of NaNO<sub>2</sub> (5.5 g, 80 mmol) in DMSO (100 mL). After stirring for 6 h, the reaction mixture was poured into ice-water (60 mL) and layered with hexanes (100 mL). The aq. phase was extracted with hexanes. Then the organic layers were washed with water (2 × 50 mL), dried over anhydrous Na<sub>2</sub>SO<sub>4</sub>, filtered, concentrated at 30 °C under vacuum (20 Torr) to afford the product as a blue oil (2.5 g, 61%

yield).

### 3-Nitropentane

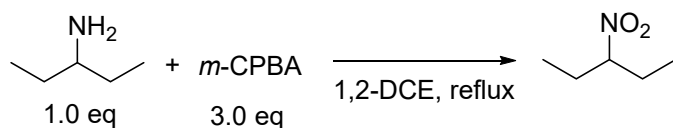

*m*-Chloroperbenzoic acid (17.2 g, 100.0 mmol) was dissolved in 1,2-dichloroethane (DCE) (20 mL) in a three-necked round-bottom flask equipped with a condenser and a pressure-equalizing dropping funnel. 3-Pentylamine (2.2 mL, 20 mmol) in 1,2-DCE (40 mL) was added dropwise to the refluxing peracid solution. Reflux was continued for 3 h after the addition and then the reaction mixture was cooled, filtered, washed with 1 M NaOH three times, dried over Na<sub>2</sub>SO<sub>4</sub>, and evaporated at 30 °C under reduced pressure (20 Torr). The crude nitro compound was purified by silica gel chromatography (light petroleum) to afford the product (1.47 g, 63% yield).

### Phenyl nitromethane<sup>39</sup>

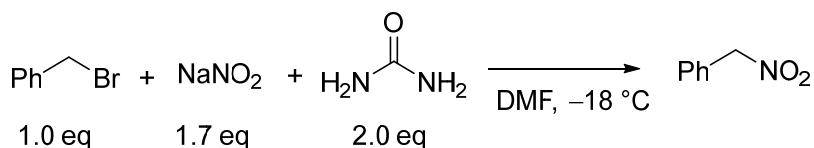

Benzyl bromide (5.10 g, 30.0 mmol) was added to a stirred mixture of NaNO<sub>2</sub> (3.50 g, 50.0 mmol) and urea (3.60 g, 60.0 mmol) in DMF (60 mL) at -18 °C. After stirring at -18 °C for 6 h, the reaction mixture was poured into ice-water (60 mL) and layered with hexanes (100 mL). The aqueous phase was extracted with diethyl ether (3 × 60 mL). Then the extracts were washed with 10% aqueous sodium thiosulfate solution (2 × 20 mL) and water (2 × 50 mL) in sequence. The organic phase was dried over anhydrous Na<sub>2</sub>SO<sub>4</sub>, filtered, concentrated, and the residue was chromatographed (20:1 hexanes/AcOEt) on silica gel to afford the product (1.85 g, 45% yield).

### 6-Nitro-1-hexene

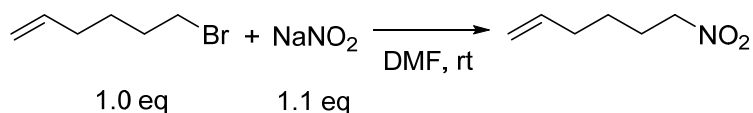

To a stirred solution of sodium nitrite (1.42 g, 20.56 mmol) in DMF (40 mL) was added 6-bromohex-1-ene (2.50 mL, 18.7 mmol), and the reaction mixture was stirred at room temperature for 2 hours. The pale yellow solution was then partitioned between ice-water (100 mL) and diethyl ether (50 mL), and the organic phase was separated. The aqueous component was extracted with diethyl ether (3 × 50 mL), and the combined organic extracts were subsequently washed with water (2 × 50 mL), dried over anhydrous Na<sub>2</sub>SO<sub>4</sub>, and concentrated under reduced pressure. Purification by flash column chromatography (petroleum) afforded the product as a pale yellow oil (1.0 g, 42% yield).

### 4.3 Preparation of *gem*-bromonitroalkanes

*gem*-bromonitroalkanes from commercial sources:

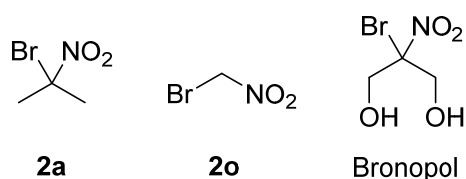

### General procedure F

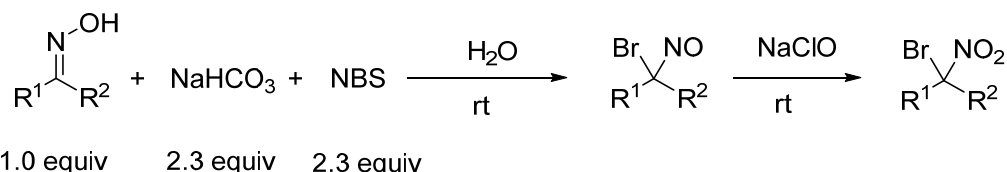

The corresponding oxime (25.0 mmol) was added to a solution of sodium bicarbonate (4.80 g, 57.5 mmol) in 150 mL of water followed by *N*-bromosuccinimide (10.2 g, 57.5 mmol). The reaction mixture was stirred at rt overnight and extracted with AcOEt, and the organic layers were washed with brine and dried over Na<sub>2</sub>SO<sub>4</sub>. After evaporation of solvents, the residue of bromonitrosoalkane was diluted with benzene (50 mL). To the benzene solution were added tetrabutylammonium hydrogensulfate (4.25 g, 12.5 mmol) and sodium hypochlorite solution (ca. 1.3 M, 60 mL) in portions. Stirring was continued until blue or green color of the reaction mixture faded. After separation and concentration of the organic phase, the crude product was purified by flash column chromatography on silica gel (petroleum ether).

### General procedure G<sup>40</sup>

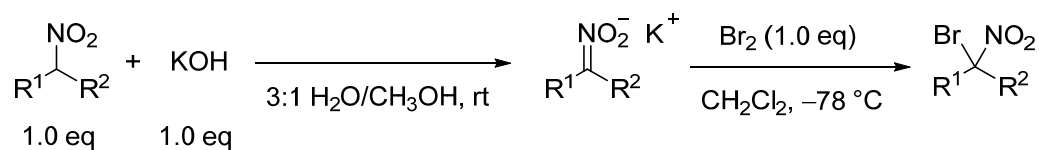

The respective nitro compound (30.0 mmol) was added to a mixture of solid KOH (85%, 2.0 g, 30 mmol), CH<sub>3</sub>OH (25 mL) and H<sub>2</sub>O (75 mL) at room temperature. The mixture was vigorously stirred until complete dissolution of the starting nitro compound (ca. 30 min), and then cooled to 0 °C. Bromine (1.52 mL, 30 mmol) in CH<sub>2</sub>Cl<sub>2</sub> (50 mL, precooled to -78 °C) was added in one pot. The cooling bath was removed, and the mixture was vigorously stirred for 5 min. After separation and concentration of the organic phase, the crude product was chromatographed on silica gel (petroleum ether).

### 5-Bromo-2,2-dimethyl-5-nitro-1,3-dioxane (2p)<sup>41</sup>

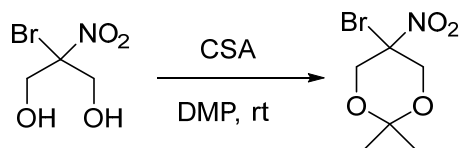

To a solution of 2-bromo-2-nitro-1,3-propanediol (20.0 g, 0.101 mol) in 2,2-dimethoxypropane (80 mL) was added L-camphor-10-sulfonic acid (1.62 g, 8.09 mmol). The mixture was stirred for 3 d at rt under a nitrogen atmosphere. The solvent was evaporated with a rotary evaporator and the residual solid was purified by chromatography on silica gel (petroleum ether) to give a white solid (70% yield).

### 6,6-Dibromo-6-nitro-1-hexene (2q)

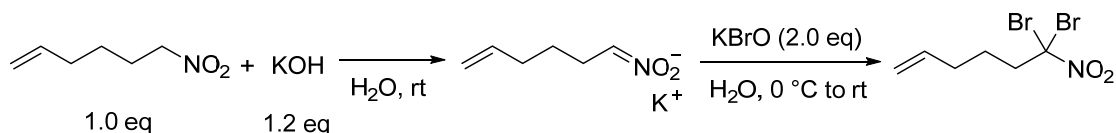

In a round-bottom flask, 6-nitro-1-hexene (1.2 g, 10 mmol) was added to a mixture of solid KOH (85%, 0.79 g, 12 mmol) and H<sub>2</sub>O (10 mL) at room temperature. The mixture was stirred at rt for 30 min, then cooled to 0 °C. A solution of KBrO (20 mmol), prepared from bromine (1.0 mL, 20 mmol), solid KOH (85%, 2.63 g, 40.0 mmol) and H<sub>2</sub>O (30 mL) at 0 °C, was added dropwise. The mixture was allowed to warm to room temperature and extracted with hexanes. The organic phases were dried over anhydrous Na<sub>2</sub>SO<sub>4</sub>, filtered and concentrated. The crude product was chromatographed on silica gel (20:1 hexanes/AcOEt) to give 6,6-dibromo-6-nitro-1-hexene as a pale yellow oil (656 mg, 23% yield).

#### 4.4 Physical data

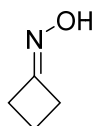

##### Cyclobutanone oxime<sup>42</sup>

White solid (3.6 g, 85% yield); <sup>1</sup>H NMR (600 MHz, Chloroform-*d*) δ 3.18 – 2.71 (m, 4H), 2.14 – 1.93 (m, 2H); <sup>13</sup>C NMR (151 MHz, Chloroform-*d*) δ 159.72, 31.34, 30.48, 14.40.

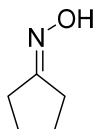

##### Cyclopentanone oxime<sup>43</sup>

White solid (4.1 g, 83% yield); <sup>1</sup>H NMR (600 MHz, Chloroform-*d*) δ 8.92 (br, *J* = 354.4 Hz, 1H), 2.40 (d, *J* = 60.6 Hz, 4H), 1.75 (s, 4H); <sup>13</sup>C NMR (151 MHz, Chloroform-*d*) δ 167.31, 31.29, 27.16, 25.13, 24.49.

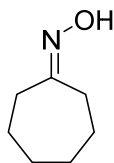

##### Cycloheptanone oxime<sup>43</sup>

White solid (5.0 g, 79% yield); <sup>1</sup>H NMR (600 MHz, Chloroform-*d*) δ 9.93 (br, 1H), 2.55 (s, 2H), 2.35 (s, 2H), 1.78 – 1.41 (m, 8H); <sup>13</sup>C NMR (151 MHz, Chloroform-*d*) δ 164.13, 33.55, 30.32, 30.20, 28.50, 27.40, 24.39.

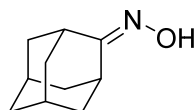

##### (1*r*,3*r*,5*R*,7*S*)-Adamantan-2-one oxime<sup>44</sup>

White solid (6.7 g, 82% yield); <sup>1</sup>H NMR (600 MHz, Chloroform-*d*) δ 3.57 (s, 1H), 2.56 (s, 1H), 2.01 – 1.82 (m, 12H); <sup>13</sup>C NMR (151 MHz, Chloroform-*d*) δ 166.97, 38.87, 37.45, 36.47, 36.22, 28.76, 27.83.



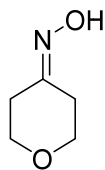

**Tetrahydro-4H-pyran-4-one oxime**<sup>45</sup>

White solid (4.5 g, 79% yield); <sup>1</sup>H NMR (600 MHz, Chloroform-*d*) δ 3.78 (d, *J* = 30.4 Hz, 4H), 2.66 (s, 2H), 2.37 (s, 2H); <sup>13</sup>C NMR (151 MHz, Chloroform-*d*) δ 155.97, 68.15, 66.67, 32.21, 25.95.

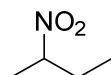

**2-Nitrobutane**

Blue oil (2.5 g, 61%); <sup>1</sup>H NMR (600 MHz, Chloroform-*d*) δ 4.41 (d, *J* = 6.7 Hz, 1H), 1.95 – 1.64 (m, 2H), 1.47 – 1.34 (m, 3H), 0.90 – 0.81 (m, 3H); <sup>13</sup>C NMR (151 MHz, Chloroform-*d*) δ 84.62, 28.12, 18.36, 9.67.

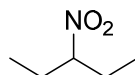

**3-Nitropentane**<sup>46</sup>

Brown oil (1.5 g, 63%); <sup>1</sup>H NMR (600 MHz, Chloroform-*d*) δ 4.25 (dd, *J* = 7.7, 4.6 Hz, 1H), 1.87 (dd, *J* = 8.3, 6.2 Hz, 2H), 1.71 (d, *J* = 7.4 Hz, 2H), 0.90 – 0.84 (m, 6H); <sup>13</sup>C NMR (151 MHz, Chloroform-*d*) δ 91.64, 26.55, 9.91.

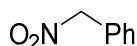

**(Nitromethyl)benzene**<sup>47,39</sup>

Yellow oil (1.85 g, 45%); <sup>1</sup>H NMR (400 MHz, Chloroform-*d*) δ 7.44 (dd, *J* = 4.5, 1.7 Hz, 5H), 5.43 (s, 2H).

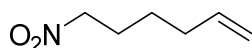

**6-Nitrohex-1-ene**<sup>48</sup>

Yellow oil (1.0 g, 42%); <sup>1</sup>H NMR (600 MHz, Chloroform-*d*) δ 5.69 (ddd, *J* = 17.0, 8.3, 5.1 Hz, 1H), 4.98 – 4.89 (m, 2H), 4.31 (d, *J* = 2.5 Hz, 2H), 1.98 (dd, *J* = 53.8, 5.4 Hz, 6H), 1.40 (d, *J* = 7.8 Hz, 2H).

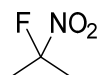

**2-Fluoro-2-nitropropane (2t)**<sup>49,50</sup>

Following general procedure G, Selectfluor was used instead of bromine.

Yellow oil (1.6 g, 82%); <sup>1</sup>H NMR (600 MHz, Chloroform-*d*) δ 1.87 (s, 3H), 1.83 (s, 3H); <sup>13</sup>C NMR (151 MHz, Chloroform-*d*) δ 118.87, 117.30, (*J* = 235.6 Hz)24.87, 24.71 (*J* = 23.9 Hz); <sup>19</sup>F NMR (376 MHz, Chloroform-*d*) δ -111.96.

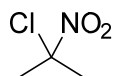

**2-Chloro-2-nitropropane (2r)**<sup>51</sup>

Following general procedure G, *N*-chlorosuccinimide was used instead of bromine.

Yellow oil (0.8 g, 43%);  $^1\text{H}$  NMR (600 MHz, Chloroform-*d*)  $\delta$  2.09 (d,  $J = 1.3$  Hz, 6H);  $^{13}\text{C}$  NMR (151 MHz, Chloroform-*d*)  $\delta$  99.99, 30.82.

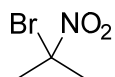

**2-Bromo-2-nitropropane (2a)**<sup>52</sup>

$^1\text{H}$  NMR (600 MHz, Chloroform-*d*)  $\delta$  2.26 (d,  $J = 7.6$  Hz, 6H).

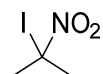

**2-Iodo-2-nitropropane (2s)**<sup>51</sup>

Following general procedure G, iodine was used instead of bromine.

$^1\text{H}$  NMR (600 MHz, Chloroform-*d*)  $\delta$  2.38 (s, 6H);  $^{13}\text{C}$  NMR (101 MHz, Chloroform-*d*)  $\delta$  62.96, 35.55.

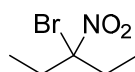

**3-Bromo-3-nitropentane (2b)**<sup>53</sup>

Following general procedure G.

Yellow oil (1.8 g, 75% yield);  $^1\text{H}$  NMR (600 MHz, Chloroform-*d*)  $\delta$  2.42 (s, 4H), 1.04 – 1.01 (m, 6H);  $^{13}\text{C}$  NMR (151 MHz, Chloroform-*d*)  $\delta$  105.25, 35.51, 9.61.

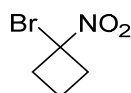

**1-Bromo-1-nitrocyclobutane (2c)**<sup>51</sup>

Following general procedure F.

Yellow oil (3.5 g, 72% yield);  $^1\text{H}$  NMR (400 MHz, Chloroform-*d*)  $\delta$  = 3.29 – 3.17 (m, 2H), 2.92 – 2.77 (m, 2H), 2.30 – 2.12 (m, 1H) 1.97 (dtt,  $J = 11.3, 9.6, 5.0$  Hz, 1H) ppm;  $^{13}\text{C}$  NMR (101 MHz, Chloroform-*d*)  $\delta$  = 84.35, 39.58, 13.62.

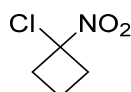

**1-Chloro-1-nitrocyclobutane (2v)**

Following general procedure F, NCS was used instead of NBS.

Yellow oil (1.7 g, 75% yield);  $^1\text{H}$  NMR (400 MHz, Chloroform-*d*)  $\delta$  3.31 – 3.01 (m, 2H), 2.74 (d,  $J = 5.7$  Hz, 2H), 2.09 (d,  $J = 51.3$  Hz, 2H);  $^{13}\text{C}$  NMR (101 MHz, Chloroform-*d*)  $\delta$  96.66, 38.48, 13.16.

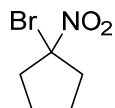

**1-Bromo-1-nitrocyclopentane (2d)**

Following general procedure F.

Yellow oil (1.7 g, 68% yield);  $^1\text{H}$  NMR (600 MHz, Chloroform-*d*)  $\delta$  2.43 (s, 4H), 1.72 (s, 2H), 1.40 (s, 1H), 0.86 (s, 1H);  $^{13}\text{C}$  NMR (151 MHz, Chloroform-*d*)  $\delta$  94.74, 39.26, 23.80, 23.53.

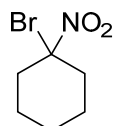

### 1-Bromo-1-nitrocyclohexane (2e)<sup>51</sup>

Following general procedure F.

Yellow oil (2.5 g, 71% yield); <sup>1</sup>H NMR (600 MHz, Chloroform-*d*) δ 2.36 (s, 4H), 1.71 – 1.34 (m, 6H); <sup>13</sup>C NMR (151 MHz, Chloroform-*d*) δ 94.62, 38.97, 23.53, 23.34.

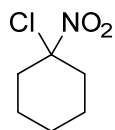

### 1-Chloro-1-nitrocyclohexane (2u)<sup>59</sup>

Following general procedure F, aqueous NaClO was used instead of NBS.

Yellow oil (2.1 g, 68% yield); <sup>1</sup>H NMR (400 MHz, Chloroform-*d*) δ 2.52 – 2.20 (m, 4H), 1.82 – 1.54 (m, 5H), 1.36 (dd, *J* = 9.2, 4.4 Hz, 1H); <sup>13</sup>C NMR (101 MHz, Chloroform-*d*) δ 103.67, 38.16, 23.84, 22.85.

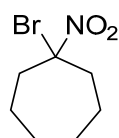

### 1-Bromo-1-nitrocycloheptane (2f)<sup>51</sup>

Following general procedure F.

Yellow oil (3.8 g, 70% yield); <sup>1</sup>H NMR (600 MHz, Chloroform-*d*) δ 2.74 (dt, *J* = 14.2, 7.5 Hz, 1H), 2.51 (d, *J* = 7.9 Hz, 1H), 2.39 (s, 2H), 1.59 (d, *J* = 28.5 Hz, 8H); <sup>13</sup>C NMR (151 MHz, Chloroform-*d*) δ 99.25, 42.98, 27.86, 22.97.

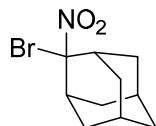

### (1r,3r,5r,7r)-2-Bromo-2-nitroadamantane (2g)<sup>54,55</sup>

Following general procedure F.

Colorless oil (1.2 g, 43% yield); <sup>1</sup>H NMR (600 MHz, Chloroform-*d*) δ 2.90 (s, 2H), 2.37 (d, *J* = 13.7 Hz, 2H), 1.98 (d, *J* = 14.6 Hz, 2H), 1.95 – 1.75 (m, 8H); <sup>13</sup>C NMR (151 MHz, Chloroform-*d*) δ 102.45, 38.31, 37.56, 34.95, 34.50, 26.09, 25.59.

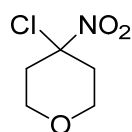

### 4-Chloro-4-nitrotetrahydro-2H-pyran (2h)

Following general procedure F, aqueous NaClO was used instead of NBS.

Yellow oil (2.5 g, 71% yield); <sup>1</sup>H NMR (400 MHz, Chloroform-*d*) δ = 4.53 (tt, *J* = 9.9, 4.7 Hz, 2H), 4.01 (dt, *J* = 12.1, 4.0 Hz, 2H), 3.46 (ddd, *J* = 12.1, 10.4, 2.9 Hz, 2H), 2.25 – 2.05 (m, 2H) ppm; <sup>13</sup>C NMR (101 MHz, Chloroform-*d*) δ = 80.67, 65.34, 30.48.

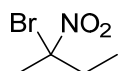

### 2-Bromo-2-nitrobutane (2i)<sup>56</sup>

Following general procedure G.

Yellow oil (1.2 g, 75% yield);  $^1\text{H}$  NMR (600 MHz, Chloroform-*d*)  $\delta$  2.41 (dd,  $J = 16.1, 7.4$  Hz, 2H), 2.20 (s, 3H), 1.03 (t,  $J = 7.3$  Hz, 3H);  $^{13}\text{C}$  NMR (101 MHz, Chloroform-*d*)  $\delta$  96.09, 37.39, 29.45, 9.88.

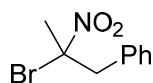

### (2-Bromo-2-nitropropyl)benzene (2j)

Following general procedure G.

Yellow oil (1.0 g, 75% yield);  $^1\text{H}$  NMR (600 MHz, Chloroform-*d*)  $\delta$  7.36 – 7.32 (m, 3H), 7.21 (dd,  $J = 6.4, 3.2$  Hz, 2H), 3.87 (d,  $J = 14.3$  Hz, 1H), 3.65 (d,  $J = 14.3$  Hz, 1H), 2.18 (s, 3H);  $^{13}\text{C}$  NMR (151 MHz, Chloroform-*d*)  $\delta$  133.12, 130.34, 128.67, 128.20, 93.60, 49.41, 28.98.

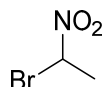

### 1-Bromo-1-nitroethane (2k)<sup>57,51</sup>

Following general procedure G.

Yellow oil (4.3 g, 94% yield);  $^1\text{H}$  NMR (600 MHz, Chloroform-*d*)  $\delta$  6.04 (q,  $J = 6.4$  Hz, 1H), 2.14 (d,  $J = 6.5$  Hz, 3H);  $^{13}\text{C}$  NMR (151 MHz, Chloroform-*d*)  $\delta$  74.52, 24.21.

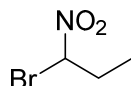

### 1-Bromo-1-nitropropane (2l)<sup>57,51</sup>

Following general procedure G.

Yellow oil (4.2 g, 86% yield);  $^1\text{H}$  NMR (600 MHz, Chloroform-*d*)  $\delta$  5.93 – 5.80 (m, 1H), 2.53 – 2.19 (m, 2H), 1.06 (t,  $J = 7.3$  Hz, 3H);  $^{13}\text{C}$  NMR (151 MHz, Chloroform-*d*)  $\delta$  81.19, 31.03, 10.35.

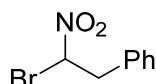

### (2-Bromo-2-nitroethyl)benzene (2m)<sup>58</sup>

Following general procedure G.

Yellow oil (1.1 g, 75% yield);  $^1\text{H}$  NMR (400 MHz, Chloroform-*d*)  $\delta$  7.38 – 7.31 (m, 3H), 7.21 (dd,  $J = 7.3, 2.3$  Hz, 2H), 6.06 (dd,  $J = 8.3, 6.1$  Hz, 1H), 3.76 (dd,  $J = 14.5, 8.2$  Hz, 1H), 3.52 (dd,  $J = 14.5, 6.1$  Hz, 1H);  $^{13}\text{C}$  NMR (101 MHz, Chloroform-*d*)  $\delta$  133.22, 129.14, 129.04, 128.27, 79.12, 43.38.

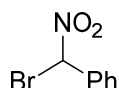

### (Bromo(nitro)methyl)benzene (2n)<sup>59</sup>

Following general procedure G.

Yellow oil (329 mg, 38% yield);  $^1\text{H}$  NMR (400 MHz, Chloroform-*d*)  $\delta$  7.68 – 7.60 (m, 2H), 7.49 – 7.41 (m, 3H), 6.91 (s, 1H).  $^{13}\text{C}$  NMR (101 MHz, Chloroform-*d*)  $\delta$  132.80, 131.39, 129.15, 128.21, 80.37.

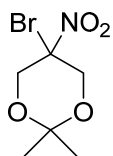

**5-Bromo-2,2-dimethyl-5-nitro-1,3-dioxane (2p)**<sup>60</sup>

White solid (16.1g, 70% yield); <sup>1</sup>H NMR (600 MHz, Chloroform-*d*) δ 4.77 (dd, *J* = 13.3, 1.6 Hz, 2H), 4.26 (d, *J* = 13.4 Hz, 2H), 1.53 (s, 3H), 1.37 (s, 3H); <sup>13</sup>C NMR (101 MHz, Chloroform-*d*) δ 99.44, 66.14, 27.77, 18.44.

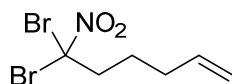

**6,6-Dibromo-6-nitrohex-1-ene (2q)**

<sup>1</sup>H NMR (400 MHz, Chloroform-*d*) δ 5.91 – 5.64 (m, 1H), 5.23 – 4.78 (m, 2H), 2.97 – 2.63 (m, 2H), 2.18 (d, *J* = 9.8 Hz, 2H), 1.77 – 1.57 (m, 2H); <sup>13</sup>C NMR (151 MHz, Chloroform-*d*) δ 136.63, 116.20, 87.66, 48.30, 32.08, 26.31.

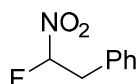

**(2-Fluoro-2-nitroethyl)benzene (2w)**<sup>49,50</sup>

Following general procedure G, Selectfluor was used instead of bromine.

<sup>1</sup>H NMR (400 MHz, Chloroform-*d*) δ 7.31 (dd, *J* = 40.0, 1.3 Hz, 5H), 6.01 (dd, *J* = 6.7, 3.8 Hz, 1H), 3.42 (d, *J* = 16.0 Hz, 2H).

**5. Photocatalytic coupling reactions.**

**5.1 Typical procedure**

A dry Schlenk tube charged with a stirring bar was evacuated and backfilled with N<sub>2</sub> (three times). Trimethylsilyl enol ether (**1a**, 457 mg, 2.38 mmol) of acetophenone, 2-bromo-2-nitropropane **2a** (200 mg, 1.19 mmol) and anhydrous acetonitrile (6.0 mL) were added via gastight syringe under N<sub>2</sub> atmosphere followed by *fac*-Ir(ppy)<sub>3</sub> (4 mg, 0.5 mol %). The reaction mixture was degassed by freeze-pump-thaw method and then stirred under irradiation with blue LEDs (460 nm, app. 3.0 cm distance from the tube). The mixture was maintained at approximately 25 °C by a desk fan in air-conditioned room. The reaction was monitored by TLC. Upon completion (8 h), the mixture was concentrated in vacuo. The crude product was purified by flash chromatography on silica gel (20:1 to 10:1 hexanes/AcOEt) to give **3aa**.

**5.2 Physical data**

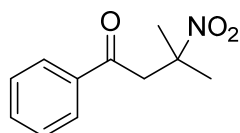

**3-Methyl-3-nitro-1-phenylbutan-1-one (3aa)**<sup>61</sup>

White solid (242 mg, 98% yield); R<sub>f</sub> = 0.25 (10:1 hexanes/AcOEt); m.p. 64.0–64.8 °C; <sup>1</sup>H NMR (400 MHz, Chloroform-*d*) δ 7.97 – 7.90 (m, 2H), 7.60 (t, *J* = 7.4 Hz, 1H), 7.48 (t, *J* = 7.7 Hz,

2H), 3.68 (s, 2H), 1.77 (s, 6H);  $^{13}\text{C}$  NMR (101 MHz, Chloroform-*d*)  $\delta$  194.94, 136.42, 133.64, 128.75, 127.93, 84.94, 47.10, 26.61.

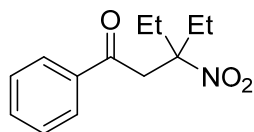

### 3-Ethyl-3-nitro-1-phenylpentan-1-one (3ab)

Colorless oil (242 mg, 98% yield);  $^1\text{H}$  NMR (600 MHz, Chloroform-*d*)  $\delta$  7.97 (dd,  $J = 8.4, 1.3$  Hz, 2H), 7.60 (t,  $J = 7.4$  Hz, 1H), 7.49 (d,  $J = 15.6$  Hz, 2H), 3.68 (s, 2H), 2.22 (dd,  $J = 7.5, 2.5$  Hz, 4H), 0.86 (t,  $J = 7.5$  Hz, 6H);  $^{13}\text{C}$  NMR (151 MHz, Chloroform-*d*)  $\delta$  195.17, 136.62, 133.60, 128.77, 127.90, 93.17, 40.66, 28.97, 8.37; IR (film)  $\nu_{\text{max}}$  2930, 1651, 1562, 1460, 1194, 1134, 1076  $\text{cm}^{-1}$ ; HRMS (ESI-TOF)  $m/z$ :  $[\text{M} + \text{Na}]^+$  Calcd for  $\text{C}_{13}\text{H}_{17}\text{NO}_3\text{Na}$  258.11; Found 258.1106.

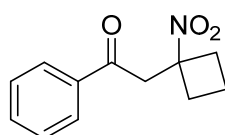

### 2-(1-Nitrocyclobutyl)-1-phenylethan-1-one (3ac)

White solid (227 mg, 87% yield);  $R_f = 0.19$  (10:1 hexanes/AcOEt); m.p. 112.4–113.9  $^{\circ}\text{C}$ ;  $^1\text{H}$  NMR (400 MHz, Chloroform-*d*)  $\delta$  7.99 – 7.92 (m, 2H), 7.60 (s, 1H), 7.48 (t,  $J = 7.7$  Hz, 2H), 3.90 (s, 2H), 3.09 – 3.02 (m, 2H), 2.37 (t,  $J = 4.9$  Hz, 2H), 2.14 (s, 1H), 1.97 (s, 1H);  $^{13}\text{C}$  NMR (101 MHz, Chloroform-*d*)  $\delta$  195.11, 136.07, 133.71, 128.76, 128.01, 84.81, 44.46, 32.70, 14.38; IR (film)  $\nu_{\text{max}}$  2957, 1678, 1533, 1449, 1400, 1360, 1269, 1225, 1078, 1001. 880, 752.27, 692.47  $\text{cm}^{-1}$ ; HRMS (ESI-TOF)  $m/z$ :  $[\text{M} + \text{Na}]^+$  Calcd for  $\text{C}_{12}\text{H}_{13}\text{NO}_3\text{Na}$  242.0787; Found 242.0786.

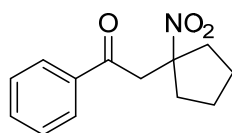

### 2-(1-Nitrocyclopentyl)-1-phenylethan-1-one (3ad)

White solid (244 mg, 88% yield);  $R_f = 0.25$  (10:1 hexanes/AcOEt); m.p. 113.5–114.8  $^{\circ}\text{C}$ ;  $^1\text{H}$  NMR (600 MHz, Chloroform-*d*)  $\delta$  7.94 (d,  $J = 8.2$  Hz, 2H), 7.62 – 7.57 (m, 1H), 7.48 (t,  $J = 7.8$  Hz, 2H), 3.81 (s, 2H), 2.71 (d,  $J = 12.1$  Hz, 2H), 1.95 (s, 4H), 1.77 (s, 2H);  $^{13}\text{C}$  NMR (151 MHz, Chloroform-*d*)  $\delta$  195.38, 136.24, 133.60, 128.73, 127.99, 94.64, 47.21, 38.87, 24.94; IR (film)  $\nu_{\text{max}}$  2963, 1686, 1599, 1539, 1447, 1400, 1364, 1221, 1180, 1142, 1074, 1001, 754, 691  $\text{cm}^{-1}$ ; HRMS (ESI-TOF)  $m/z$ :  $[\text{M} + \text{Na}]^+$  Calcd for  $\text{C}_{13}\text{H}_{15}\text{NO}_3\text{Na}$  256.0944; Found 256.0948.

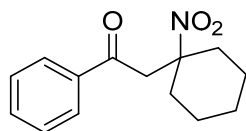

### 2-(1-Nitrocyclohexyl)-1-phenylethan-1-one (3ae)

Colorless oil (271 mg, 92% yield);  $R_f = 0.27$  (10:1 hexanes/AcOEt);  $^1\text{H}$  NMR (400 MHz, Chloroform-*d*)  $\delta$  7.93 – 7.86 (m, 2H), 7.56 (t,  $J = 7.4$  Hz, 1H), 7.47 – 7.39 (m, 2H), 3.64 (s, 2H), 2.35 (dd,  $J = 13.5, 8.4$  Hz, 2H), 2.00 (dd,  $J = 13.5, 8.6$  Hz, 2H), 1.50 (s, 6H);  $^{13}\text{C}$  NMR (151 MHz, Chloroform-*d*)  $\delta$  195.15, 136.49, 133.44, 128.58, 127.82, 88.44, 44.84, 34.53, 24.62,

22.32; IR (film)  $\nu_{max}$  2953, 2926, 2855, 1690, 1682, 1537, 1450, 1364, 1215, 1007, 750, 688  $\text{cm}^{-1}$ ; HRMS (ESI-TOF)  $m/z$ :  $[\text{M} + \text{Na}]^+$  Calcd for  $\text{C}_{14}\text{H}_{17}\text{NO}_3\text{Na}$  270.11; Found 270.1096.

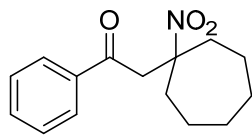

### 2-(1-Nitrocycloheptyl)-1-phenylethan-1-one (3af)

White solid (255 mg, 82% yield);  $R_f = 0.27$  (10:1 hexanes/AcOEt); m.p. 116.3–118.2 °C;  $^1\text{H}$  NMR (400 MHz, Chloroform-*d*)  $\delta$  7.93 (d,  $J = 7.0$  Hz, 2H), 7.58 (d,  $J = 7.5$  Hz, 1H), 7.51 – 7.43 (m, 2H), 2.66 – 2.55 (m, 2H), 2.05 (dd,  $J = 15.9, 10.0$  Hz, 2H), 1.62 (d,  $J = 35.4$  Hz, 10H);  $^{13}\text{C}$  NMR (101 MHz, Chloroform-*d*)  $\delta$  195.16, 136.53, 133.56, 128.72, 127.94, 92.12, 47.29, 38.12, 29.98, 23.45; IR (film)  $\nu_{max}$  2924, 1688, 1539, 1180, 1142, 1074, 758, 689  $\text{cm}^{-1}$ ; HRMS (ESI-TOF)  $m/z$ :  $[\text{M} + \text{Na}]^+$  Calcd for  $\text{C}_{15}\text{H}_{19}\text{NO}_3\text{Na}$  284.1257; Found 284.1264.

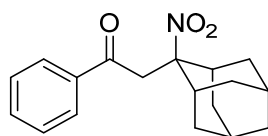

### 2-((1R,3S,5r,7r)-2-Nitroadamantan-2-yl)-1-phenylethan-1-one (3ag)

White solid (335 mg, 94% yield);  $R_f = 0.3$  (10:1 hexanes/AcOEt); m.p. 122.8–124.5 °C;  $^1\text{H}$  NMR (600 MHz, Chloroform-*d*)  $\delta$  7.82 (dd,  $J = 8.4, 1.3$  Hz, 2H), 7.57 (t,  $J = 7.4$  Hz, 1H), 7.45 (d,  $J = 8.4$  Hz, 2H), 3.60 (s, 2H), 2.75 (s, 2H), 2.11 (s, 2H), 1.95 (s, 3H), 1.86 (d,  $J = 15.5$  Hz, 3H), 1.76 (d,  $J = 9.1$  Hz, 4H);  $^{13}\text{C}$  NMR (151 MHz, Cyclohexane-*d*<sub>12</sub>)  $\delta$  196.09, 137.17, 133.60, 128.72, 127.92, 95.58, 43.16, 37.91, 34.50, 33.89, 26.38; IR (film)  $\nu_{max}$  2918, 1688, 1535, 1449, 1354, 764, 691  $\text{cm}^{-1}$ ; HRMS (ESI-TOF)  $m/z$ :  $[\text{M} + \text{Na}]^+$  Calcd for  $\text{C}_{18}\text{H}_{21}\text{NO}_3\text{Na}$  322.1413; Found 322.1416.

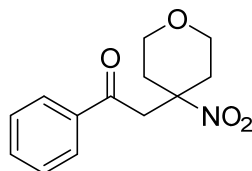

### 2-(4-Nitrotetrahydro-2H-pyran-4-yl)-1-phenylethan-1-one (3ah)

Colorless oil (131 mg, 44% yield);  $R_f = 0.1$  (10:1 hexanes/AcOEt);  $^1\text{H}$  NMR (600 MHz, Chloroform-*d*)  $\delta$  8.10 (d,  $J = 6.9$  Hz, 2H), 7.89 (d,  $J = 7.1$  Hz, 2H), 7.61 – 7.57 (m, 2H), 7.46 (t,  $J = 7.9$  Hz, 4H), 3.82 – 3.73 (m, 4H), 3.66 (s, 2H), 2.53 (d,  $J = 14.6$  Hz, 2H), 2.11 (s, 2H);  $^{13}\text{C}$  NMR (151 MHz, Chloroform-*d*)  $\delta$  194.58, 171.40, 136.26, 133.88, 133.71, 130.17, 129.32, 128.83, 128.47, 127.99, 85.40, 63.91, 46.32, 34.44, 29.67; IR (film)  $\nu_{max}$  2924, 1535, 1451, 1383, 1180, 1142, 1074, 1042, 1015  $\text{cm}^{-1}$ ; HRMS (ESI-TOF)  $m/z$ :  $[\text{M} + \text{Na}]^+$  Calcd for  $\text{C}_{13}\text{H}_{15}\text{NO}_4\text{Na}$  272.0893; Found 272.0897.

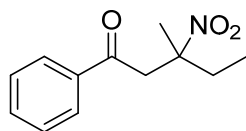

### 3-Methyl-3-nitro-1-phenylpentan-1-one (3ai)

Colorless oil (218 mg, 90% yield);  $R_f = 0.4$  (10:1 hexanes/AcOEt);  $^1\text{H}$  NMR (400 MHz, Chloroform-*d*)  $\delta$  7.95 – 7.90 (m, 2H), 7.58 (t,  $J = 7.4$  Hz, 1H), 7.46 (t,  $J = 7.6$  Hz, 2H), 3.84 (d,  $J = 18.0$  Hz, 1H), 3.49 (d,  $J = 18.0$  Hz, 1H), 2.10 – 1.99 (m, 2H), 1.74 (s, 3H), 0.93 (t,  $J = 7.5$  Hz, 3H);  $^{13}\text{C}$  NMR (101 MHz, Chloroform-*d*)  $\delta$  195.07, 136.40, 133.53, 128.66, 127.84, 88.48, 45.37, 33.70, 22.02, 8.17; IR (film)  $\nu_{\text{max}}$  2967, 2932, 2878, 1711, 1551, 1458, 1375, 700  $\text{cm}^{-1}$ ; HRMS (ESI-TOF)  $m/z$ :  $[\text{M} + \text{Na}]^+$  Calcd for  $\text{C}_{12}\text{H}_{15}\text{NO}_3\text{Na}$  244.0944; Found 244.0947.

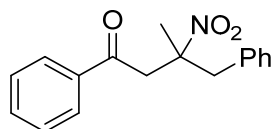

### 3-Methyl-3-nitro-1,4-diphenylbutan-1-one (3aj)

Colorless oil (307 mg, 91% yield);  $R_f = 0.3$  (8:1 hexanes/AcOEt);  $^1\text{H}$  NMR (400 MHz, Chloroform-*d*)  $\delta$  7.90 (dd,  $J = 8.2, 1.4$  Hz, 2H), 7.60 (s, 1H), 7.47 (t,  $J = 7.9$  Hz, 2H), 7.31 – 7.25 (m, 3H), 7.09 (dd,  $J = 6.8, 2.8$  Hz, 2H), 3.71 (d,  $J = 18.1$  Hz, 1H), 3.54 – 3.39 (m, 3H), 1.77 (s, 3H);  $^{13}\text{C}$  NMR (151 MHz, Chloroform-*d*)  $\delta$  195.23, 136.51, 134.57, 133.65, 130.09, 128.75, 128.66, 127.90, 127.69, 88.76, 45.25, 44.68, 23.73; IR (film)  $\nu_{\text{max}}$  2924, 2853, 1684, 1539, 1450, 1383, 1358, 1142, 1074, 1042, 1013, 756, 727, 689, 557  $\text{cm}^{-1}$ ; HRMS (ESI-TOF)  $m/z$ :  $[\text{M} + \text{Na}]^+$  Calcd for  $\text{C}_{17}\text{H}_{17}\text{NO}_3\text{Na}$  306.11; Found 306.1099.

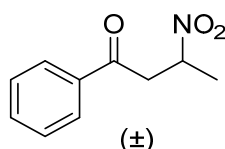

### 3-Nitro-1-phenylbutan-1-one (3ak)<sup>62</sup>

Colorless oil (214 mg, 93% yield);  $R_f = 0.17$  (10:1 hexanes/AcOEt);  $^1\text{H}$  NMR (600 MHz, Chloroform-*d*)  $\delta$  7.95 (d,  $J = 7.1$  Hz, 2H), 7.60 (t,  $J = 7.4$  Hz, 1H), 7.51 – 7.45 (m, 2H), 5.20 – 5.16 (m, 1H), 3.91 (dd,  $J = 18.0, 8.0$  Hz, 1H), 3.29 (d,  $J = 5.0$  Hz, 1H), 1.68 (s, 3H);  $^{13}\text{C}$  NMR (101 MHz, Chloroform-*d*)  $\delta$  195.11, 135.76, 133.81, 128.45, 128.03, 78.08, 42.36, 19.60;

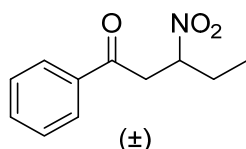

### 3-Nitro-1-phenylpentan-1-one (3al)<sup>62</sup>

Colorless oil (234 mg, 95% yield);  $R_f = 0.25$  (10:1 hexanes/AcOEt);  $^1\text{H}$  NMR (400 MHz, Chloroform-*d*)  $\delta$  7.96 (dd,  $J = 8.3, 1.4$  Hz, 2H), 7.61 (t,  $J = 7.4$  Hz, 1H), 7.49 (t,  $J = 7.6$  Hz, 2H), 5.15 – 5.04 (m, 1H), 3.95 – 3.85 (m, 1H), 3.27 (dd,  $J = 18.2, 4.3$  Hz, 1H), 2.07 – 1.99 (m, 2H), 1.05 (t,  $J = 7.4$  Hz, 3H);  $^{13}\text{C}$  NMR (101 MHz, Chloroform-*d*)  $\delta$  195.24, 135.80, 133.84, 128.79, 128.07, 83.88, 40.57, 27.21, 10.03.

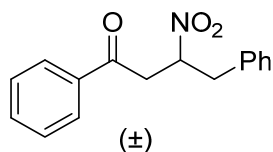

### 3-Nitro-1,4-diphenylbutan-1-one (3am)

White solid (295 mg, 92% yield);  $R_f = 0.37$  (8:1 hexanes/AcOEt); m.p. 114.4–115.3 °C;  $^1\text{H}$  NMR (400 MHz, Chloroform-*d*)  $\delta$  7.91 (d,  $J = 7.2$  Hz, 2H), 7.60 (s, 1H), 7.46 (d,  $J = 7.8$  Hz,



2H), 7.33 (d,  $J = 7.8$  Hz, 3H), 7.23 (s, 2H), 5.42 – 5.33 (m, 1H), 3.84 (dd,  $J = 18.4, 8.6$  Hz, 1H), 3.42 (dd,  $J = 13.9, 6.6$  Hz, 1H), 3.30 – 3.21 (m, 2H);  $^{13}\text{C}$  NMR (151 MHz, Chloroform-*d*)  $\delta$  195.15, 135.80, 134.91, 133.87, 129.09, 129.02, 128.80, 128.08, 127.74, 83.58, 40.02, 39.80; IR (film)  $\nu_{\text{max}}$  1680, 1543, 1437, 1383, 1283, 1219, 1074, 928, 750, 700, 546  $\text{cm}^{-1}$ ; HRMS (ESI-TOF)  $m/z$ :  $[\text{M} + \text{Na}]^+$  Calcd for  $\text{C}_{16}\text{H}_{15}\text{NO}_3\text{Na}$  292.0944; Found 292.0938.

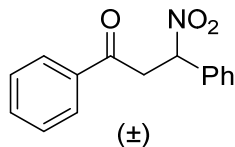

### 3-Nitro-1,3-diphenylpropan-1-one (3an)

White solid (45 mg, 35% yield);  $R_f = 0.37$  (10:1 hexanes/AcOEt); m.p. 114.4–116.1  $^{\circ}\text{C}$ ;  $^1\text{H}$  NMR (600 MHz, Chloroform-*d*)  $\delta$  8.00 (dd,  $J = 8.4, 1.3$  Hz, 2H), 7.62 (s, 1H), 7.52 – 7.42 (m, 7H), 6.16 (dd,  $J = 10.1, 3.6$  Hz, 1H), 4.42 (dd,  $J = 18.3, 10.1$  Hz, 1H), 3.51 (dd,  $J = 18.3, 3.6$  Hz, 1H);  $^{13}\text{C}$  NMR (151 MHz, Chloroform-*d*)  $\delta$  194.84, 135.73, 134.35, 133.94, 130.00, 129.28, 128.85, 128.18, 127.46, 85.48, 42.35; IR (film)  $\nu_{\text{max}}$  1687, 1552, 1365, 756, 690  $\text{cm}^{-1}$ ; HRMS (ESI-TOF)  $m/z$ :  $[\text{M} + \text{Na}]^+$  Calcd for  $\text{C}_{15}\text{H}_{13}\text{NO}_3\text{Na}$  278.0895; Found 278.0788.

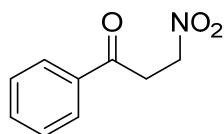

### 3-Nitro-1-phenylpropan-1-one (3ao)<sup>63</sup>

White solid (164 mg, 77% yield);  $R_f = 0.25$  (10:1 hexanes/AcOEt); m.p. 76.8–78.0  $^{\circ}\text{C}$ ;  $^1\text{H}$  NMR (400 MHz, Chloroform-*d*)  $\delta$  8.02 – 7.95 (m, 2H), 7.65 – 7.60 (m, 1H), 7.53 – 7.48 (m, 2H), 4.83 (t,  $J = 6.1$  Hz, 2H), 3.67 (t,  $J = 6.1$  Hz, 2H);  $^{13}\text{C}$  NMR (101 MHz, Chloroform-*d*)  $\delta$  194.94, 135.67, 133.95, 128.86, 128.12, 69.26, 34.85.

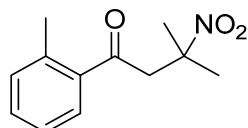

### 3-Methyl-3-nitro-1-(*o*-tolyl)butan-1-one (3ba)

Colorless oil (229 mg, 87% yield);  $R_f = 0.22$  (10:1 hexanes/AcOEt);  $^1\text{H}$  NMR (600 MHz, Chloroform-*d*)  $\delta$  7.63 (dd,  $J = 7.8, 1.4$  Hz, 1H), 7.39 (d,  $J = 1.3$  Hz, 1H), 7.28 – 7.23 (m, 2H), 3.59 (s, 2H), 2.47 (s, 3H), 1.75 (s, 6H);  $^{13}\text{C}$  NMR (151 MHz, Chloroform-*d*)  $\delta$  198.84, 138.50, 137.09, 132.17, 131.78, 128.16, 125.73, 84.98, 49.73, 26.66, 21.22; IR (film)  $\nu_{\text{max}}$  2932, 1811, 1786, 1746, 1709, 1516, 1368, 1173, 976, 879, 698  $\text{cm}^{-1}$ ; HRMS (ESI-TOF)  $m/z$ :  $[\text{M} + \text{Na}]^+$  Calcd for  $\text{C}_{12}\text{H}_{15}\text{NO}_3\text{Na}$  244.0944; Found 244.0947.

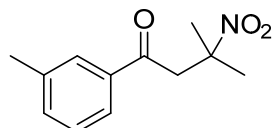

### 3-Methyl-3-nitro-1-(*m*-tolyl)butan-1-one (3ca)

Colorless oil (234 mg, 89% yield);  $R_f = 0.22$  (10:1 hexanes/AcOEt);  $^1\text{H}$  NMR (600 MHz, Chloroform-*d*)  $\delta$  7.74 – 7.68 (m, 2H), 7.38 (d,  $J = 7.5$  Hz, 1H), 7.33 (t,  $J = 7.6$  Hz, 1H), 3.67 (s, 2H), 2.38 (s, 3H), 1.74 (s, 6H);  $^{13}\text{C}$  NMR (101 MHz, Chloroform-*d*)  $\delta$  195.15, 138.44, 136.27,

134.25, 128.47, 128.32, 125.00, 84.73, 47.02, 26.48, 21.14; IR (film)  $\nu_{max}$  2932, 1811, 1786, 1746, 1709, 1516, 1368, 1173, 976, 879, 698  $\text{cm}^{-1}$ ; HRMS (ESI-TOF)  $m/z$ :  $[M + Na]^+$  Calcd for  $\text{C}_{12}\text{H}_{15}\text{NO}_3\text{Na}$  244.0944; Found 244.0947.

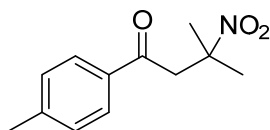

### 3-Methyl-3-nitro-1-(*p*-tolyl)butan-1-one (3da)

White solid (237 mg, 90% yield);  $R_f$  = 0.22 (10:1 hexanes/AcOEt); m.p. 58.2–58.9 °C;  $^1\text{H}$  NMR (600 MHz, Chloroform-*d*)  $\delta$  7.83 (d,  $J$  = 8.2 Hz, 2H), 7.28 (s, 2H), 3.65 (s, 2H), 2.42 (s, 3H), 1.76 (s, 6H);  $^{13}\text{C}$  NMR (151 MHz, Chloroform-*d*)  $\delta$  194.55, 144.57, 134.03, 129.42, 128.07, 85.05, 46.98, 26.60, 21.65; IR (film)  $\nu_{max}$  2932, 1811, 1786, 1746, 1709, 1516, 1368, 1173, 976, 879, 698  $\text{cm}^{-1}$ ; HRMS (ESI-TOF)  $m/z$ :  $[M + Na]^+$  Calcd for  $\text{C}_{12}\text{H}_{15}\text{NO}_3\text{Na}$  244.0944; Found 244.0947.

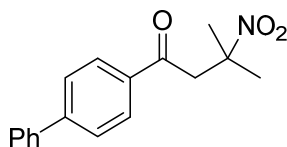

### 1-([1,1'-Biphenyl]-4-yl)-3-methyl-3-nitrobutan-1-one (3ea)

Colorless oil (320 mg, 95% yield);  $R_f$  = 0.19 (10:1 hexanes/AcOEt);  $^1\text{H}$  NMR (600 MHz, Chloroform-*d*)  $\delta$  8.01 (d,  $J$  = 8.5 Hz, 2H), 7.70 (d,  $J$  = 8.5 Hz, 2H), 7.63 (d,  $J$  = 6.9 Hz, 2H), 7.48 (t,  $J$  = 7.6 Hz, 2H), 7.42 (d,  $J$  = 7.5 Hz, 1H), 3.71 (s, 2H), 1.79 (s, 6H);  $^{13}\text{C}$  NMR (151 MHz, Chloroform-*d*)  $\delta$  194.51, 146.35, 139.64, 135.14, 129.00, 128.56, 128.40, 127.37, 127.27, 85.04, 47.11, 26.63; IR (film)  $\nu_{max}$  2932, 1543, 1404, 1370, 1348, 1074, 762, 692  $\text{cm}^{-1}$ ; HRMS (ESI-TOF)  $m/z$ :  $[M + Na]^+$  Calcd for  $\text{C}_{17}\text{H}_{17}\text{NO}_3\text{Na}$  306.1106; Found 306.1106.

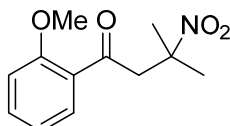

### 1-(2-Methoxyphenyl)-3-methyl-3-nitrobutan-1-one (3fa)

Colorless oil (234 mg, 83% yield);  $R_f$  = 0.18 (10:1 hexanes/AcOEt);  $^1\text{H}$  NMR (600 MHz, Chloroform-*d*)  $\delta$  7.71 (dd,  $J$  = 7.7, 1.8 Hz, 1H), 7.50 – 7.44 (m, 1H), 6.98 (dd,  $J$  = 14.5, 8.1 Hz, 2H), 3.92 (s, 3H), 3.70 (s, 2H), 1.71 (s, 6H);  $^{13}\text{C}$  NMR (151 MHz, Chloroform-*d*)  $\delta$  196.71, 158.68, 134.16, 130.45, 127.25, 120.77, 111.56, 85.07, 55.49, 52.39, 26.59; IR (film)  $\nu_{max}$  1680, 1601, 1543, 1362, 1262, 1231, 1175, 1074, 1017, 835, 571  $\text{cm}^{-1}$ ; HRMS (ESI-TOF)  $m/z$ :  $[M + H]^+$  Calcd for  $\text{C}_{12}\text{H}_{16}\text{NO}_4$  238.1073; Found 238.1078.

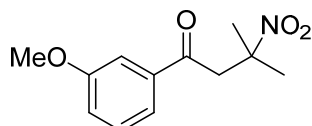

### 1-(3-Methoxyphenyl)-3-methyl-3-nitrobutan-1-one (3ga)

Yellow solid (246 mg, 87% yield);  $R_f$  = 0.18 (10:1 hexanes/AcOEt); m.p. 70.3–71.7 °C;  $^1\text{H}$  NMR (600 MHz, Chloroform-*d*)  $\delta$  7.50 (d,  $J$  = 7.8 Hz, 1H), 7.45 (s, 1H), 7.41 – 7.35 (m, 1H), 7.16 – 7.11 (m, 1H), 3.85 (s, 3H), 3.66 (s, 2H), 1.76 (s, 6H);  $^{13}\text{C}$  NMR (101 MHz, Chloroform-

*d*)  $\delta$  194.79, 159.92, 137.72, 129.71, 120.48, 120.18, 112.12, 84.88, 55.43, 47.21, 26.59; IR (film)  $\nu_{max}$  1680, 1601, 1543, 1362, 1262, 1231, 1175, 1074, 1017, 835, 571  $\text{cm}^{-1}$ ; HRMS (ESI-TOF)  $m/z$ :  $[\text{M} + \text{H}]^+$  Calcd for  $\text{C}_{12}\text{H}_{16}\text{NO}_4$  238.1073; Found 238.1078.

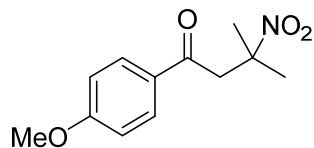

#### 1-(4-Methoxyphenyl)-3-methyl-3-nitrobutan-1-one (3ha)

White solid (240 mg, 85% yield);  $R_f$  = 0.18 (10:1 hexanes/AcOEt); m.p. 78.7–79.9 °C;  $^1\text{H}$  NMR (600 MHz, Chloroform-*d*)  $\delta$  7.94 – 7.88 (m, 2H), 6.96 – 6.91 (m, 2H), 3.87 (s, 3H), 3.62 (s, 2H), 1.75 (s, 6H);  $^{13}\text{C}$  NMR (101 MHz, Chloroform-*d*)  $\delta$  193.40, 163.87, 130.24, 129.50, 113.85, 85.02, 55.50, 46.74, 26.60; IR (film)  $\nu_{max}$  1680, 1601, 1543, 1362, 1262, 1231, 1175, 1074, 1017, 835, 571  $\text{cm}^{-1}$ ; HRMS (ESI-TOF)  $m/z$ :  $[\text{M} + \text{H}]^+$  Calcd for  $\text{C}_{12}\text{H}_{16}\text{NO}_4$  238.1073; Found 238.1078.

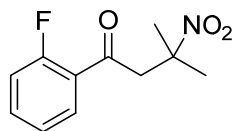

#### 1-(2-Fluorophenyl)-3-methyl-3-nitrobutan-1-one (3ia)

Colorless oil (228 mg, 85% yield);  $R_f$  = 0.3 (10:1 hexanes/AcOEt);  $^1\text{H}$  NMR (600 MHz, Chloroform-*d*)  $\delta$  7.84 (t,  $J$  = 7.7 Hz, 1H), 7.57 – 7.51 (m, 1H), 7.26 – 7.20 (m, 1H), 7.14 (dd,  $J$  = 11.0, 8.8 Hz, 1H), 3.67 (d,  $J$  = 3.0 Hz, 2H), 1.74 (d,  $J$  = 1.4 Hz, 6H);  $^{13}\text{C}$  NMR (151 MHz, Chloroform-*d*)  $\delta$  193.12, 162.76, 135.20, 130.61, 124.87, 124.65, 116.66, 84.64, 51.92, 26.65;  $^{19}\text{F}$  NMR (376 MHz, Chloroform-*d*)  $\delta$  -108.47; IR (film)  $\nu_{max}$  1692, 1587, 1543, 1441, 1360, 1252, 1142, 866, 783  $\text{cm}^{-1}$ ; HRMS (ESI-TOF)  $m/z$ :  $[\text{M} + \text{Na}]^+$  Calcd for  $\text{C}_{11}\text{H}_{12}\text{NO}_3\text{FNa}$  248.0693; Found 248.0696.

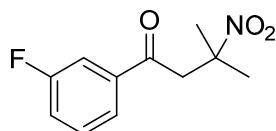

#### 1-(3-Fluorophenyl)-3-methyl-3-nitrobutan-1-one (3ja)

White solid (214 mg, 80% yield);  $R_f$  = 0.3 (10:1 hexanes/AcOEt); m.p. 127.1–128.2 °C;  $^1\text{H}$  NMR (600 MHz, Chloroform-*d*)  $\delta$  7.71 (d,  $J$  = 7.7 Hz, 1H), 7.61 (d,  $J$  = 9.4 Hz, 1H), 7.49 – 7.44 (m, 1H), 7.30 (d,  $J$  = 2.6 Hz, 1H), 3.65 (s, 2H), 1.77 (d,  $J$  = 1.1 Hz, 6H);  $^{13}\text{C}$  NMR (101 MHz, Chloroform-*d*)  $\delta$  193.73, 161.61, 138.41, 130.51, 123.66, 120.60, 114.85, 84.79, 47.20, 26.60;  $^{19}\text{F}$  NMR (376 MHz, Chloroform-*d*)  $\delta$  -111.70; IR (film)  $\nu_{max}$  1692, 1587, 1543, 1441, 1360, 1252, 1142, 866, 783  $\text{cm}^{-1}$ ; HRMS (ESI-TOF)  $m/z$ :  $[\text{M} + \text{Na}]^+$  Calcd for  $\text{C}_{11}\text{H}_{12}\text{NO}_3\text{FNa}$  248.0693; Found 248.0696.

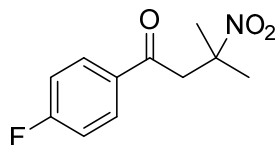

#### 1-(4-Fluorophenyl)-3-methyl-3-nitrobutan-1-one (3ka)

Colorless oil (233 mg, 87% yield);  $R_f$  = 0.3 (10:1 hexanes/AcOEt);  $^1\text{H}$  NMR (600 MHz,

Chloroform-*d*)  $\delta$  7.96 (dd,  $J = 8.8, 5.3$  Hz, 2H), 7.21 – 7.10 (m, 2H), 3.64 (s, 2H), 1.76 (s, 6H);  $^{13}\text{C}$  NMR (151 MHz, Chloroform-*d*)  $\delta$  193.37, 165.20, 132.89, 130.64, 115.98, 84.92, 46.99, 26.62;  $^{19}\text{F}$  NMR (376 MHz, Chloroform-*d*)  $\delta$  -103.93; IR (film)  $\nu_{\text{max}}$  1692, 1587, 1543, 1441, 1360, 1252, 1142, 866, 783  $\text{cm}^{-1}$ ; HRMS (ESI-TOF)  $m/z$ :  $[\text{M} + \text{Na}]^+$  Calcd for  $\text{C}_{11}\text{H}_{12}\text{NO}_3\text{FNa}$  248.0693; Found 248.0696.

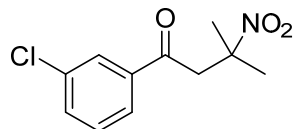

### 1-(3-Chlorophenyl)-3-methyl-3-nitrobutan-1-one (3la)

Colorless oil (236 mg, 82% yield);  $R_f = 0.27$  (10:1 hexanes/AcOEt);  $^1\text{H}$  NMR (600 MHz, Chloroform-*d*)  $\delta$  7.90 (t,  $J = 1.8$  Hz, 1H), 7.59 – 7.55 (m, 1H), 7.43 (t,  $J = 7.9$  Hz, 2H), 3.64 (s, 2H), 1.77 (s, 6H);  $^{13}\text{C}$  NMR (151 MHz, Chloroform-*d*)  $\delta$  193.71, 137.93, 135.17, 133.57, 130.11, 128.12, 126.01, 84.85, 47.15, 26.62; IR (film)  $\nu_{\text{max}}$  1694, 1587, 1535, 1396, 1350, 1283, 1227, 1136, 1085, 843, 816, 571  $\text{cm}^{-1}$ ; HRMS (ESI-TOF)  $m/z$ :  $[\text{M} + \text{Na}]^+$  Calcd for  $\text{C}_{11}\text{H}_{12}\text{NO}_3\text{NaCl}$  264.0397; Found 264.0399.

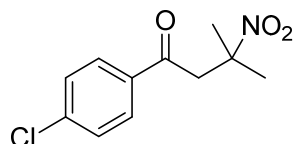

### 1-(4-Chlorophenyl)-3-methyl-3-nitrobutan-1-one (3ma)

Colorless oil (239 mg, 83% yield);  $R_f = 0.27$  (10:1 hexanes/AcOEt);  $^1\text{H}$  NMR (600 MHz, Chloroform-*d*)  $\delta$  7.89 – 7.84 (m, 2H), 7.48 – 7.43 (m, 2H), 3.63 (s, 2H), 1.76 (s, 6H);  $^{13}\text{C}$  NMR (151 MHz, Chloroform-*d*)  $\delta$  193.75, 140.21, 134.74, 129.35, 129.10, 84.90, 47.02, 26.62; IR (film)  $\nu_{\text{max}}$  1694, 1587, 1535, 1396, 1350, 1283, 1227, 1136, 1085, 843, 816, 571  $\text{cm}^{-1}$ ; HRMS (ESI-TOF)  $m/z$ :  $[\text{M} + \text{Na}]^+$  Calcd for  $\text{C}_{11}\text{H}_{12}\text{NO}_3\text{ClNa}$  264.0397; Found 264.0399.

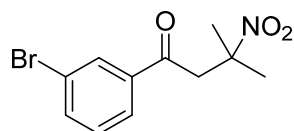

### 1-(3-Bromophenyl)-3-methyl-3-nitrobutan-1-one (3na)

Colorless oil (300 mg, 88% yield);  $R_f = 0.24$  (10:1 hexanes/AcOEt); m.p. 126.3–128.2  $^{\circ}\text{C}$ ;  $^1\text{H}$  NMR (600 MHz, Chloroform-*d*)  $\delta$  8.05 (d,  $J = 1.8$  Hz, 1H), 7.85 (d,  $J = 7.8$  Hz, 1H), 7.72 (d,  $J = 8.0$  Hz, 1H), 7.36 (t,  $J = 7.9$  Hz, 1H), 3.64 (s, 2H), 1.76 (s, 6H);  $^{13}\text{C}$  NMR (151 MHz, Chloroform-*d*)  $\delta$  193.63, 138.09, 136.47, 131.03, 130.35, 126.44, 123.09, 84.81, 47.10, 26.61; IR (film)  $\nu_{\text{max}}$  2957, 1692, 1539, 1395, 1136, 1074, 1010, 810, 571  $\text{cm}^{-1}$ ; HRMS (ESI-TOF)  $m/z$ :  $[\text{M} + \text{H}]^+$  Calcd for  $\text{C}_{11}\text{H}_{13}\text{NO}_3\text{Br}$  286.0073; Found 286.0070.

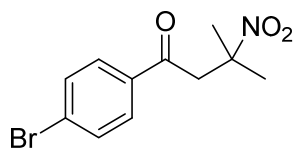

### 1-(4-Bromophenyl)-3-methyl-3-nitrobutan-1-one (3oa)

Colorless oil (293 mg, 86% yield);  $R_f = 0.24$  (10:1 hexanes/AcOEt);  $^1\text{H}$  NMR (400 MHz, Chloroform-*d*)  $\delta$  7.83 – 7.76 (m, 2H), 7.66 – 7.58 (m, 2H), 3.63 (s, 2H), 1.76 (s, 6H);  $^{13}\text{C}$  NMR

(151 MHz, Chloroform-*d*)  $\delta$  193.99, 135.09, 132.05, 129.41, 128.88, 84.83, 46.96, 26.59; IR (film)  $\nu_{max}$  2957, 1692, 1539, 1395, 1136, 1074, 1010, 810, 571  $\text{cm}^{-1}$ ; HRMS (ESI-TOF)  $m/z$ :  $[\text{M}+\text{H}]^+$  Calcd for  $\text{C}_{11}\text{H}_{13}\text{NO}_3\text{Br}$  286.0073; Found 286.0070.

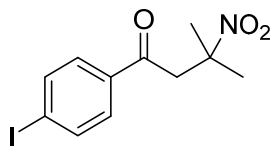

#### 1-(4-Iodophenyl)-3-methyl-3-nitrobutan-1-one (3pa)

Colorless oil (337 mg, 85% yield);  $R_f$  = 0.20 (10:1 hexanes/AcOEt);  $^1\text{H}$  NMR (600 MHz, Chloroform-*d*)  $\delta$  7.85 (d,  $J$  = 8.1 Hz, 2H), 7.63 (d,  $J$  = 8.2 Hz, 2H), 3.62 (s, 2H), 1.76 (s, 6H);  $^{13}\text{C}$  NMR (101 MHz, Chloroform-*d*)  $\delta$  194.27, 138.09, 135.62, 129.26, 101.76, 84.83, 46.91, 26.61; IR (film)  $\nu_{max}$  1688, 1580, 1539, 1458, 1385, 1356, 1279, 1227, 997, 804  $\text{cm}^{-1}$ ; HRMS (ESI-TOF)  $m/z$ :  $[\text{M} + \text{Na}]^+$  Calcd for  $\text{C}_{11}\text{H}_{12}\text{NO}_3\text{NaI}$  355.9754; Found 355.9751.

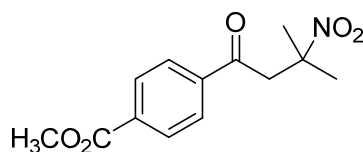

#### Methyl 4-(3-methyl-3-nitrobutanoyl)benzoate (3qa)

White solid (291 mg, 91% yield);  $R_f$  = 0.18 (8:1 hexanes/AcOEt); m.p. 99.0–100.8  $^\circ\text{C}$ ;  $^1\text{H}$  NMR (400 MHz, Chloroform-*d*)  $\delta$  8.13 (d,  $J$  = 8.2 Hz, 2H), 7.98 (d,  $J$  = 8.2 Hz, 2H), 3.95 (s, 3H), 3.69 (s, 2H), 1.78 (s, 6H);  $^{13}\text{C}$  NMR (101 MHz, Chloroform-*d*)  $\delta$  194.51, 166.03, 139.50, 134.38, 129.95, 127.87, 84.84, 52.53, 47.37, 26.62; IR (film)  $\nu_{max}$  1723, 1696, 1535, 1281, 1182, 1138, 1107, 1074, 1041, 1015, 849, 766, 698  $\text{cm}^{-1}$ ; HRMS (ESI-TOF)  $m/z$ :  $[\text{M} + \text{Na}]^+$  Calcd for  $\text{C}_{13}\text{H}_{15}\text{NO}_5\text{Na}$  288.0842; Found 288.0845.

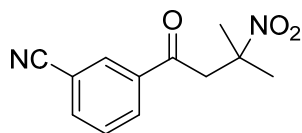

#### 3-(3-Methyl-3-nitrobutanoyl)benzonitrile (3ra)

Colorless oil (196 mg, 71% yield);  $R_f$  = 0.26 (5:1 hexanes/AcOEt);  $^1\text{H}$  NMR (400 MHz, Chloroform-*d*)  $\delta$  8.21 (s, 1H), 8.17–8.11 (m, 1H), 7.87 (d,  $J$  = 7.7 Hz, 1H), 7.64 (t,  $J$  = 7.9 Hz, 1H), 3.66 (s, 2H), 1.78 (s, 6H);  $^{13}\text{C}$  NMR (151 MHz, Chloroform-*d*)  $\delta$  193.07, 137.09, 136.45, 131.85, 131.63, 129.87, 117.66, 113.38, 84.75, 47.05, 26.66; IR (film)  $\nu_{max}$  1692, 1541, 1420, 1361, 1287, 1240, 1142, 1026, 922, 802, 756, 679  $\text{cm}^{-1}$ ; HRMS (ESI-TOF)  $m/z$ :  $[\text{M} + \text{Na}]^+$  Calcd for  $\text{C}_{12}\text{H}_{12}\text{N}_2\text{O}_3\text{Na}$  255.074; Found 255.0737.

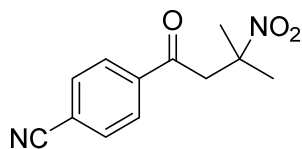

#### 4-(3-Methyl-3-nitrobutanoyl)benzonitrile (3sa)

Colorless oil (199 mg, 72% yield);  $R_f$  = 0.26 (5:1 hexanes/AcOEt); m.p. 117.3–119.0  $^\circ\text{C}$ ;  $^1\text{H}$  NMR (600 MHz, Chloroform-*d*)  $\delta$  8.02 (d,  $J$  = 8.5 Hz, 2H), 7.79 (d,  $J$  = 8.5 Hz, 2H), 3.67 (s, 2H), 1.78 (s, 6H);  $^{13}\text{C}$  NMR (151 MHz, Chloroform-*d*)  $\delta$  193.74, 139.26, 132.64, 128.38, 117.68, 116.95, 84.80, 47.25, 26.64; IR (film)  $\nu_{max}$  1692, 1541, 1420, 1361, 1287, 1240, 1142, 1026,

922, 802, 756, 679  $\text{cm}^{-1}$ ; HRMS (ESI-TOF)  $m/z$ :  $[\text{M} + \text{Na}]^+$  Calcd for  $\text{C}_{12}\text{H}_{12}\text{N}_2\text{O}_3\text{Na}$  255.074; Found 255.0737.

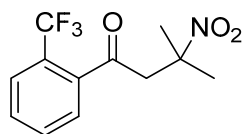

### 3-Methyl-3-nitro-1-(2-(trifluoromethyl)phenyl)butan-1-one (3ta)

Colorless oil (232 mg, 71% yield);  $R_f = 0.19$  (10:1 hexanes/AcOEt);  $^1\text{H}$  NMR (600 MHz, Chloroform-*d*)  $\delta$  7.71 (d,  $J = 7.9$  Hz, 1H), 7.64 (s, 1H), 7.58 (s, 1H), 7.49 (d,  $J = 7.5$  Hz, 1H), 3.52 (s, 2H), 1.76 (s, 6H);  $^{13}\text{C}$  NMR (151 MHz, Chloroform-*d*)  $\delta$  199.15, 139.36, 132.06, 130.41, 127.00, 126.74, 126.70, 124.46, 84.84, 51.32, 26.30;  $^{19}\text{F}$  NMR (376 MHz, Chloroform-*d*)  $\delta$  -62.75; IR (film)  $\nu_{\text{max}}$  1701, 1609, 1545, 1379, 1329, 1179, 1138  $\text{cm}^{-1}$ ; HRMS (ESI-TOF)  $m/z$ :  $[\text{M} + \text{Na}]^+$  Calcd for  $\text{C}_{12}\text{H}_{12}\text{NO}_3\text{F}_3\text{Na}$  298.0661; Found 298.0666.

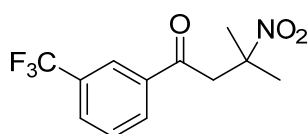

### 3-Methyl-3-nitro-1-(3-(trifluoromethyl)phenyl)butan-1-one (3ua)

Colorless oil (236 mg, 72% yield);  $R_f = 0.19$  (10:1 hexanes/AcOEt); m.p. 69.4–70.2  $^\circ\text{C}$ ;  $^1\text{H}$  NMR (600 MHz, Chloroform-*d*)  $\delta$  8.18 (s, 1H), 8.12 (dt,  $J = 7.8, 1.5$  Hz, 1H), 7.87 (mt,  $J = 16.0, 7.7, 2.0, 1.0$  Hz, 1H), 7.64 (s, 1H), 3.70 (s, 2H), 1.79 (s, 6H);  $^{13}\text{C}$  NMR (101 MHz, Chloroform-*d*)  $\delta$  193.68, 136.85, 133.36, 131.08, 130.02, 129.52, 124.77, 84.79, 47.13, 26.64;  $^{19}\text{F}$  NMR (376 MHz, Chloroform-*d*)  $\delta$  -62.75; IR (film)  $\nu_{\text{max}}$  1701, 1609, 1545, 1379, 1329, 1179, 1138  $\text{cm}^{-1}$ ; HRMS (ESI-TOF)  $m/z$ :  $[\text{M} + \text{Na}]^+$  Calcd for  $\text{C}_{12}\text{H}_{12}\text{NO}_3\text{F}_3\text{Na}$  298.0661; Found 298.0666.

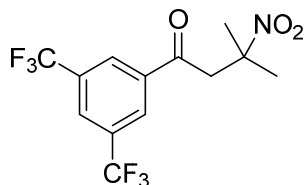

### 1-(3,5-Bis(trifluoromethyl)phenyl)-3-methyl-3-nitrobutan-1-one (3va)

Colorless oil (278 mg, 68% yield);  $R_f = 0.24$  (10:1 hexanes/AcOEt);  $^1\text{H}$  NMR (600 MHz, Chloroform-*d*)  $\delta$  8.46 (s, 2H), 8.36 (s, 1H), 3.72 (s, 2H), 1.80 (s, 6H);  $^{13}\text{C}$  NMR (101 MHz, Chloroform-*d*)  $\delta$  192.41, 137.76, 132.43, 127.95, 126.78, 121.40, 84.70, 47.13, 26.66;  $^{19}\text{F}$  NMR (376 MHz, Chloroform-*d*)  $\delta$  -62.92; IR (film)  $\nu_{\text{max}}$  1690, 1287, 1177, 1128  $\text{cm}^{-1}$ ; HRMS (ESI-TOF)  $m/z$ :  $[\text{M} + \text{Na}]^+$  Calcd for  $\text{C}_{13}\text{H}_{11}\text{NO}_3\text{F}_6\text{Na}$  366.0535; Found 366.0531.

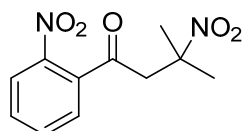

### 3-Methyl-3-nitro-1-(2-nitrophenyl)butan-1-one (3wa)

Colorless oil (114 mg, 38% yield);  $R_f = 0.18$  (8:1 hexanes/AcOEt);  $^1\text{H}$  NMR (600 MHz, Chloroform-*d*)  $\delta$  8.17 (d,  $J = 8.3$  Hz, 1H), 7.77 (d,  $J = 1.1$  Hz, 1H), 7.64 (s, 1H), 7.47 (dd,  $J = 7.6, 1.4$  Hz, 1H), 3.50 (s, 2H), 1.81 (s, 6H);  $^{13}\text{C}$  NMR (151 MHz, Chloroform-*d*)  $\delta$  197.34,

153.25, 137.28, 134.73, 130.79, 127.62, 124.52, 85.12, 53.40, 26.33; IR (film)  $\nu_{max}$  1692, 1605, 1533, 1424, 1348, 1285, 1136, 1074, 1013, 982, 930, 795, 714, 561  $\text{cm}^{-1}$ ; HRMS (ESI-TOF)  $m/z$ :  $[\text{M} + \text{Na}]^+$  Calcd for  $\text{C}_{11}\text{H}_{12}\text{N}_2\text{O}_5\text{Na}$  275.0638; Found 275.0634.

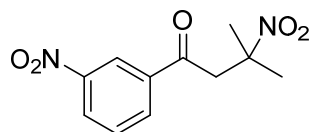

### 3-Methyl-3-nitro-1-(3-nitrophenyl)butan-1-one (3xa)

White solid (225 mg, 75% yield);  $R_f = 0.18$  (8:1 hexanes/AcOEt); m.p. 193.2–194.9  $^{\circ}\text{C}$ ;  $^1\text{H}$  NMR (400 MHz, Chloroform-*d*)  $\delta$  8.78 – 8.73 (m, 1H), 8.46 (dd,  $J = 8.2, 1.2$  Hz, 1H), 8.32 – 8.24 (m, 1H), 7.72 (t,  $J = 8.0$  Hz, 1H), 3.72 (s, 2H), 1.81 (s, 6H);  $^{13}\text{C}$  NMR (101 MHz, Chloroform-*d*)  $\delta$  192.92, 148.41, 137.50, 133.50, 130.15, 127.90, 122.84, 84.72, 47.19, 26.69; IR (film)  $\nu_{max}$  1692, 1605, 1533, 1424, 1348, 1285, 1136, 1074, 1013, 982, 930, 795, 714, 561  $\text{cm}^{-1}$ ; HRMS (ESI-TOF)  $m/z$ :  $[\text{M} + \text{Na}]^+$  Calcd for  $\text{C}_{11}\text{H}_{12}\text{N}_2\text{O}_5\text{Na}$  275.0638; Found 275.0634.

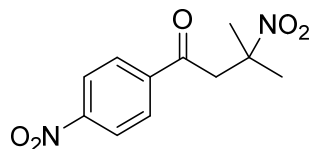

### 3-Methyl-3-nitro-1-(4-nitrophenyl)butan-1-one (3ya)

White solid (216 mg, 72% yield);  $R_f = 0.18$  (8:1 hexanes/AcOEt); m.p. 193.1–194.9  $^{\circ}\text{C}$ ;  $^1\text{H}$  NMR (400 MHz, Chloroform-*d*)  $\delta$  8.35 (s, 1H), 8.32 (s, 1H), 8.11 (s, 1H), 8.09 (s, 1H), 3.70 (s, 2H), 1.80 (s, 6H);  $^{13}\text{C}$  NMR (151 MHz, Chloroform-*d*)  $\delta$  193.56, 150.64, 140.72, 129.04, 84.82, 47.47, 29.68, 26.67; IR (film)  $\nu_{max}$  1692, 1605, 1533, 1424, 1348, 1285, 1136, 1074, 1013, 982, 930, 795, 714, 561  $\text{cm}^{-1}$ ; HRMS (ESI-TOF)  $m/z$ :  $[\text{M} + \text{Na}]^+$  Calcd for  $\text{C}_{11}\text{H}_{12}\text{N}_2\text{O}_5\text{Na}$  275.0638; Found 275.0634.

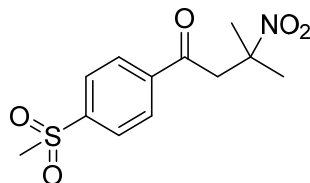

### 3-Methyl-1-(4-(methylsulfonyl)phenyl)-3-nitrobutan-1-one (3za)

White solid (197 mg, 58% yield);  $R_f = 0.23$  (5:1 hexanes/AcOEt); m.p. 138.2–139.8  $^{\circ}\text{C}$ ;  $^1\text{H}$  NMR (400 MHz, Chloroform-*d*)  $\delta$  8.12 (d,  $J = 8.7$  Hz, 2H), 8.07 (d,  $J = 8.7$  Hz, 2H), 3.69 (s, 2H), 3.09 (s, 3H), 1.79 (s, 6H);  $^{13}\text{C}$  NMR (151 MHz, Chloroform-*d*)  $\delta$  193.87, 144.70, 140.28, 128.85, 127.97, 84.83, 47.40, 44.30, 26.68; IR (film)  $\nu_{max}$  1693, 1661, 1611, 1543, 1316, 1296, 1152, 1086  $\text{cm}^{-1}$ ; HRMS (ESI-TOF)  $m/z$ :  $[\text{M} + \text{Na}]^+$  Calcd for  $\text{C}_{12}\text{H}_{15}\text{NO}_5\text{NaS}$  308.0563; Found 308.0559.

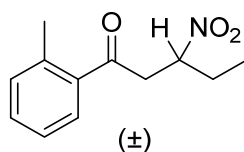

### 3-Nitro-1-(*o*-tolyl)pentan-1-one (3bl)

Colorless oil (234 mg, 89% yield);  $R_f = 0.25$  (10:1 hexanes/AcOEt);  $^1\text{H}$  NMR (400 MHz, Chloroform-*d*)  $\delta$  7.73 – 7.67 (m, 1H), 7.42 (t,  $J = 7.5$  Hz, 1H), 7.28 (d,  $J = 7.3$  Hz, 2H), 5.13 –

5.05 (m, 1H), 3.82 (dd,  $J = 18.1, 9.2$  Hz, 1H), 3.19 (dd,  $J = 18.1, 4.1$  Hz, 1H), 2.49 (s, 3H), 2.07 – 1.95 (m, 2H), 1.04 (t,  $J = 7.4$  Hz, 3H);  $^{13}\text{C}$  NMR (151 MHz, Chloroform-*d*)  $\delta$  198.60, 138.98, 136.21, 132.25, 132.11, 128.68, 125.82, 84.03, 42.98, 27.12, 21.38, 9.99; IR (film)  $\nu_{\text{max}}$  2972, 2928, 1692, 1551, 1456, 1379, 980, 759.99  $\text{cm}^{-1}$ ; HRMS (ESI-TOF)  $m/z$ :  $[\text{M} + \text{Na}]^+$  Calcd for  $\text{C}_{12}\text{H}_{15}\text{NO}_3\text{Na}$  244.0944; Found 244.0949.

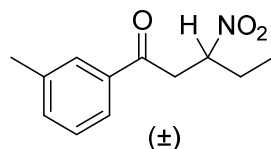

### 3-Nitro-1-(*m*-tolyl)pentan-1-one (3cl)

Colorless oil (232 mg, 88% yield);  $R_f = 0.25$  (10:1 hexanes/AcOEt);  $^1\text{H}$  NMR (400 MHz, Chloroform-*d*)  $\delta$  7.75 (s, 2H), 7.39 (dd,  $J = 15.8, 7.7$  Hz, 2H), 5.14 – 5.03 (m, 1H), 3.87 (dd,  $J = 18.1, 8.7$  Hz, 1H), 3.26 (dd,  $J = 18.2, 4.4$  Hz, 1H), 2.41 (s, 3H), 2.06 – 1.98 (m, 2H), 1.04 (t,  $J = 7.4$  Hz, 3H);  $^{13}\text{C}$  NMR (101 MHz, Chloroform-*d*)  $\delta$  195.41, 138.63, 135.85, 134.55, 128.62, 128.55, 125.26, 83.92, 40.60, 27.17, 21.26, 9.99; IR (film)  $\nu_{\text{max}}$  2972, 2928, 1692, 1551, 1456, 1379, 980, 759.99  $\text{cm}^{-1}$ ; HRMS (ESI-TOF)  $m/z$ :  $[\text{M} + \text{Na}]^+$  Calcd for  $\text{C}_{12}\text{H}_{15}\text{NO}_3\text{Na}$  244.0944; Found 244.0949.

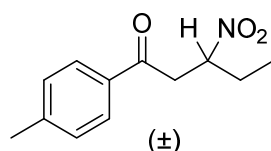

### 3-Nitro-1-(*p*-tolyl)pentan-1-one (3dl)

Colorless oil (224 mg, 85% yield);  $R_f = 0.25$  (10:1 hexanes/AcOEt);  $^1\text{H}$  NMR (600 MHz, Chloroform-*d*)  $\delta$  7.86 (d,  $J = 8.2$  Hz, 2H), 7.27 (d,  $J = 17.0$  Hz, 2H), 5.14 – 5.05 (m, 1H), 3.86 (dd,  $J = 18.0, 8.5$  Hz, 1H), 3.25 (dd,  $J = 18.0, 4.5$  Hz, 1H), 2.42 (s, 3H), 2.06 – 1.99 (m, 2H), 1.04 (t,  $J = 7.4$  Hz, 3H);  $^{13}\text{C}$  NMR (151 MHz, Chloroform-*d*)  $\delta$  194.80, 144.81, 133.44, 129.47, 128.21, 84.02, 40.51, 27.23, 21.68, 10.04; IR (film)  $\nu_{\text{max}}$  2972, 2928, 1692, 1551, 1456, 1379, 980, 759.99  $\text{cm}^{-1}$ ; HRMS (ESI-TOF)  $m/z$ :  $[\text{M} + \text{Na}]^+$  Calcd for  $\text{C}_{12}\text{H}_{15}\text{NO}_3\text{Na}$  244.0944; Found 244.0949.

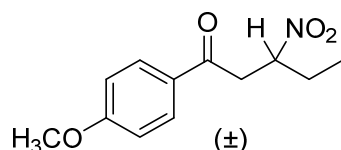

### 1-(4-Methoxyphenyl)-3-nitropentan-1-one (3hl)

Colorless oil (251 mg, 89% yield);  $R_f = 0.37$  (5:1 hexanes/AcOEt);  $^1\text{H}$  NMR (400 MHz, Chloroform-*d*)  $\delta$  7.95 – 7.90 (m, 2H), 6.97 – 6.92 (m, 2H), 5.09 (d,  $J = 4.5$  Hz, 1H), 3.87 (d,  $J = 0.6$  Hz, 4H), 3.26 – 3.18 (m, 1H), 2.06 – 1.97 (m, 2H), 1.03 (t,  $J = 7.4$  Hz, 3H);  $^{13}\text{C}$  NMR (101 MHz, Chloroform-*d*)  $\delta$  193.63, 164.04, 130.40, 128.93, 113.93, 84.10, 55.51, 40.25, 27.22, 10.04; IR (film)  $\nu_{\text{max}}$  2974, 2938, 1678, 1601, 1551, 1258, 1175, 1026, 835, 567  $\text{cm}^{-1}$ ; HRMS (ESI-TOF)  $m/z$ :  $[\text{M} + \text{Na}]^+$  Calcd for  $\text{C}_{12}\text{H}_{15}\text{NO}_4\text{Na}$  260.0893; Found 260.0897.

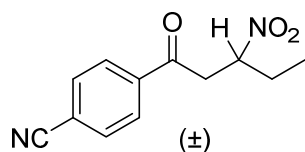



### 4-(3-Nitropentanoyl)benzonitrile (3sl)

Colorless oil (227 mg, 82% yield);  $R_f = 0.19$  (10:1 hexanes/AcOEt);  $^1\text{H NMR}$  (400 MHz, Chloroform-*d*)  $\delta$  8.05 (d,  $J = 8.3$  Hz, 2H), 7.80 (d,  $J = 8.3$  Hz, 2H), 5.10 (dd,  $J = 7.0, 3.6$  Hz, 1H), 3.97 – 3.88 (m, 1H), 3.23 (dd,  $J = 18.3, 4.0$  Hz, 1H), 2.11 – 1.99 (m, 2H), 1.06 (t,  $J = 7.4$  Hz, 3H);  $^{13}\text{C NMR}$  (101 MHz, Chloroform-*d*)  $\delta$  194.13, 138.68, 132.70, 128.53, 117.64, 117.16, 83.49, 40.67, 27.17, 9.99; IR (film)  $\nu_{\text{max}}$  1692, 1541, 1420, 1361, 1287, 1240, 1142, 1026, 922, 802, 756, 679  $\text{cm}^{-1}$ ; HRMS (ESI-TOF)  $m/z$ :  $[\text{M} + \text{Na}]^+$  Calcd for  $\text{C}_{12}\text{H}_{12}\text{N}_2\text{O}_3\text{Na}$  255.074; Found 255.0737.

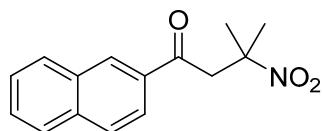

### 3-Methyl-1-(naphthalen-2-yl)-3-nitrobutan-1-one (3a'a)

White solid (285 mg, 93% yield);  $R_f = 0.27$  (10:1 hexanes/AcOEt); m.p. 119.5–120.5 °C;  $^1\text{H NMR}$  (600 MHz, Chloroform-*d*)  $\delta$  8.45 (s, 1H), 8.02 – 7.95 (m, 2H), 7.90 (dd,  $J = 13.8, 8.5$  Hz, 2H), 7.66 – 7.60 (m, 1H), 7.60 – 7.55 (m, 1H), 3.82 (s, 2H), 1.82 (s, 6H);  $^{13}\text{C NMR}$  (151 MHz, Chloroform-*d*)  $\delta$  194.88, 135.80, 133.84, 132.42, 129.77, 129.60, 128.82, 128.71, 127.84, 127.02, 123.48, 85.14, 47.16, 26.67; IR (film)  $\nu_{\text{max}}$  2922, 1680, 1539, 1466, 1362, 1126, 858, 818, 748  $\text{cm}^{-1}$ ; HRMS (ESI-TOF)  $m/z$ :  $[\text{M} + \text{H}]^+$  Calcd for  $\text{C}_{15}\text{H}_{16}\text{NO}_3$  258.1124; Found 258.1129.

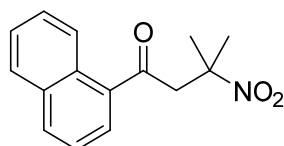

### 3-Methyl-1-(naphthalen-1-yl)-3-nitrobutan-1-one (3b'a)

White solid (282 mg, 92% yield);  $R_f = 0.27$  (10:1 hexanes/AcOEt); m.p. 119.5–120.5 °C;  $^1\text{H NMR}$  (600 MHz, Chloroform-*d*)  $\delta$  8.55 (d,  $J = 8.6$  Hz, 1H), 8.02 (d,  $J = 8.2$  Hz, 1H), 7.90 – 7.86 (m, 2H), 7.61 – 7.49 (m, 3H), 3.76 (s, 2H), 1.82 (s, 6H);  $^{13}\text{C NMR}$  (151 MHz, Chloroform-*d*)  $\delta$  199.13, 135.24, 133.99, 133.23, 129.99, 128.48, 128.26, 127.42, 126.70, 125.57, 124.21, 85.20, 50.26, 26.75; IR (film)  $\nu_{\text{max}}$  2922, 1680, 1539, 1466, 1362, 1126, 858, 818, 748  $\text{cm}^{-1}$ ; HRMS (ESI-TOF)  $m/z$ :  $[\text{M} + \text{H}]^+$  Calcd for  $\text{C}_{15}\text{H}_{16}\text{NO}_3$  258.1124; Found 258.1129.

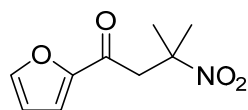

### 1-(Furan-2-yl)-3-methyl-3-nitrobutan-1-one (3c'a)

Colorless oil (216 mg, 92% yield);  $R_f = 0.23$  (8:1 hexanes/AcOEt);  $^1\text{H NMR}$  (600 MHz, Chloroform-*d*)  $\delta$  7.59 (d,  $J = 0.9$  Hz, 1H), 7.22 (d,  $J = 3.6$  Hz, 1H), 6.56 (dd,  $J = 3.6, 1.7$  Hz, 1H), 3.52 (s, 2H), 1.74 (s, 6H);  $^{13}\text{C NMR}$  (101 MHz, Chloroform-*d*)  $\delta$  184.14, 152.35, 146.66, 117.53, 112.60, 85.05, 46.57, 26.51; IR (film)  $\nu_{\text{max}}$  2365, 2340, 1543, 1464  $\text{cm}^{-1}$ ; HRMS (ESI-TOF)  $m/z$ :  $[\text{M} + \text{Na}]^+$  Calcd for  $\text{C}_9\text{H}_{11}\text{NO}_4\text{Na}$  220.0586; Found 220.0584.

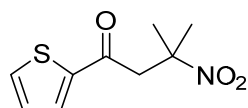

### 3-Methyl-3-nitro-1-(thiophen-2-yl)butan-1-one (3d'a)

Colorless oil (233 mg, 92% yield);  $R_f = 0.15$  (10:1 hexanes/AcOEt);  $^1\text{H NMR}$  (400 MHz, Chloroform-*d*)  $\delta$  7.70 (dd,  $J = 17.4, 5.0$  Hz, 2H), 7.14 (d,  $J = 4.7$  Hz, 1H), 3.60 (s, 2H), 1.76 (s, 6H);  $^{13}\text{C NMR}$  (101 MHz, Chloroform-*d*)  $\delta$  187.83, 143.70, 134.44, 132.22, 128.26, 85.18, 47.48, 26.53; IR (film)  $\nu_{\text{max}}$  1607, 1543, 1462, 1413, 1180, 1140, 1074  $\text{cm}^{-1}$ ; HRMS (ESI-TOF)  $m/z$ :  $[\text{M} + \text{Na}]^+$  Calcd for  $\text{C}_9\text{H}_{11}\text{NO}_3\text{SNa}$  236.0351; Found 236.0349.

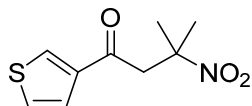

### 3-Methyl-3-nitro-1-(thiophen-3-yl)butan-1-one (3e'a)

White solid (233 mg, 92% yield);  $R_f = 0.15$  (10:1 hexanes/AcOEt); m.p. 69.6–71.1  $^{\circ}\text{C}$ ;  $^1\text{H NMR}$  (600 MHz, Chloroform-*d*)  $\delta$  8.06 (d,  $J = 1.6$  Hz, 1H), 7.52 (d,  $J = 5.1$  Hz, 1H), 7.33 (d,  $J = 1.4$  Hz, 1H), 3.58 (s, 2H), 1.75 (d,  $J = 1.5$  Hz, 6H);  $^{13}\text{C NMR}$  (151 MHz, Chloroform-*d*)  $\delta$  189.23, 141.73, 132.34, 126.75, 126.70, 85.03, 48.11, 26.54; IR (film)  $\nu_{\text{max}}$  1607, 1543, 1462, 1413, 1180, 1140, 1074  $\text{cm}^{-1}$ ; HRMS (ESI-TOF)  $m/z$ :  $[\text{M} + \text{Na}]^+$  Calcd for  $\text{C}_9\text{H}_{11}\text{NO}_3\text{SNa}$  236.0351; Found 236.0349.

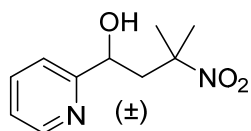

### 3-Methyl-3-nitro-1-(pyridin-2-yl)butan-1-ol (3f'a)

Colorless oil (195 mg, 78% yield);  $R_f = 0.86$  (AcOEt);  $^1\text{H NMR}$  (400 MHz, Chloroform-*d*)  $\delta$  8.52 – 8.48 (m, 1H), 7.73 – 7.66 (m, 1H), 7.30 – 7.19 (m, 2H), 4.82 (dd,  $J = 9.5, 3.1$  Hz, 1H), 4.29 (t,  $J = 6.7$  Hz, 1H), 2.39 – 2.29 (m, 2H), 1.73 (s, 6H);  $^{13}\text{C NMR}$  (101 MHz, Chloroform-*d*)  $\delta$  161.00, 148.23, 137.06, 122.70, 120.25, 87.42, 69.60, 48.51, 26.61, 26.34; IR (film)  $\nu_{\text{max}}$  1593, 1539, 1470, 1142, 1076, 766  $\text{cm}^{-1}$ ; HRMS (ESI-TOF)  $m/z$ :  $[\text{M} + \text{H}]^+$  Calcd for  $\text{C}_{10}\text{H}_{15}\text{N}_2\text{O}_3$  211.1077; Found 211.1071.

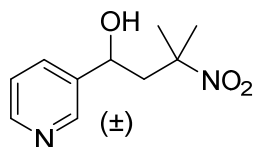

### 3-Methyl-3-nitro-1-(pyridin-3-yl)butan-1-ol (3g'a)

Colorless oil (188 mg, 75% yield);  $R_f = 0.43$  (AcOEt);  $^1\text{H NMR}$  (400 MHz, Chloroform-*d*)  $\delta$  8.46 (s, 2H), 7.71 (d,  $J = 7.9$  Hz, 1H), 7.26 (s, 1H), 4.87 (dd,  $J = 10.1, 2.7$  Hz, 1H), 2.53 (dd,  $J = 15.1, 10.1$  Hz, 1H), 2.15 (dd,  $J = 15.1, 2.7$  Hz, 1H), 1.71 (d,  $J = 2.3$  Hz, 6H);  $^{13}\text{C NMR}$  (101 MHz, Benzene-*d*<sub>6</sub>)  $\delta$  148.78, 147.08, 140.08, 133.78, 123.75, 86.94, 77.32, 77.00, 76.68, 68.47, 48.49, 27.00, 26.06; IR (film)  $\nu_{\text{max}}$  1593, 1539, 1470, 1142, 1076, 766  $\text{cm}^{-1}$ ; HRMS (ESI-TOF)  $m/z$ :  $[\text{M} + \text{H}]^+$  Calcd for  $\text{C}_{10}\text{H}_{15}\text{N}_2\text{O}_3$  211.1004; Found 211.1071.

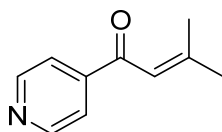

### 3-Methyl-1-(pyridin-4-yl)but-2-en-1-one (3h'a)

Colorless oil (133 mg, 69% yield);  $R_f = 0.45$  (5:1 hexanes/AcOEt);  $^1\text{H NMR}$  (600 MHz, Chloroform-*d*)  $\delta$  8.77 (d,  $J = 6.1$  Hz, 2H), 7.72 – 7.66 (m, 2H), 6.71 (s, 1H), 2.26 (s, 3H), 2.05

(s, 3H);  $^{13}\text{C}$  NMR (151 MHz, Chloroform-*d*)  $\delta$  189.79, 160.60, 150.62, 145.46, 121.26, 119.98, 28.26, 21.51; IR (film)  $\nu_{\text{max}}$  2926, 2384, 1659, 1381, 1132, 1074  $\text{cm}^{-1}$ ; HRMS (ESI-TOF)  $m/z$ :  $[\text{M} + \text{H}]^+$  Calcd for  $\text{C}_{10}\text{H}_{12}\text{NO}$  162.0913; Found 162.0914.

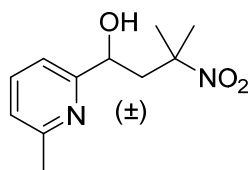

### 3-Methyl-1-(6-methylpyridin-2-yl)-3-nitrobutan-1-ol (3i'a)

Colorless oil (219 mg, 82% yield);  $R_f$  = 0.95 (AcOEt);  $^1\text{H}$  NMR (400 MHz, Chloroform-*d*)  $\delta$  7.58 (t,  $J$  = 7.7 Hz, 1H), 7.06 (t,  $J$  = 8.3 Hz, 2H), 4.77 (dd,  $J$  = 10.0, 2.5 Hz, 1H), 4.59 (s, 1H), 2.54 (s, 3H), 2.39 – 2.34 (m, 1H), 2.29 – 2.22 (m, 1H), 1.75 (d,  $J$  = 3.5 Hz, 6H);  $^{13}\text{C}$  NMR (101 MHz, Chloroform-*d*)  $\delta$  159.86, 157.18, 137.27, 122.14, 117.08, 87.62, 69.12, 48.91, 26.63, 26.46, 24.16; IR (film)  $\nu_{\text{max}}$  1599, 1539, 1460, 1180, 1140, 1074  $\text{cm}^{-1}$ ; HRMS (ESI-TOF)  $m/z$ :  $[\text{M} + \text{H}]^+$  Calcd for  $\text{C}_{11}\text{H}_{17}\text{N}_2\text{O}_3$  225.1233; Found 225.1231.

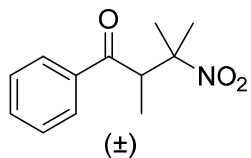

### 2,3-Dimethyl-3-nitro-1-phenylbutan-1-one (3j'a)<sup>61</sup>

Colorless oil (216 mg, 82% yield);  $R_f$  = 0.28 (20:1 hexanes/AcOEt);  $^1\text{H}$  NMR (600 MHz, Chloroform-*d*)  $\delta$  7.97 (d,  $J$  = 7.0 Hz, 2H), 7.62 – 7.56 (m, 1H), 7.50 (t,  $J$  = 7.8 Hz, 2H), 4.41 (q,  $J$  = 7.2 Hz, 1H), 1.72 (d,  $J$  = 20.4 Hz, 6H), 1.24 (d,  $J$  = 7.2 Hz, 3H);  $^{13}\text{C}$  NMR (151 MHz, Chloroform-*d*)  $\delta$  200.48, 136.54, 133.52, 128.84, 128.36, 90.67, 46.62, 23.84, 14.20.

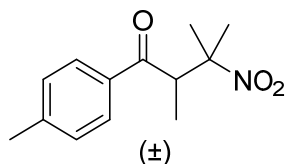

### 2,3-Dimethyl-3-nitro-1-(*p*-tolyl)butan-1-one (3k'a)

White solid (238 mg, 85% yield);  $R_f$  = 0.25 (20:1 hexanes/AcOEt); m.p. 82.1–83.2 °C;  $^1\text{H}$  NMR (400 MHz, Chloroform-*d*)  $\delta$  7.87 (d,  $J$  = 8.3 Hz, 2H), 7.27 (d,  $J$  = 7.5 Hz, 3H), 4.38 (q,  $J$  = 7.2 Hz, 1H), 2.42 (s, 3H), 1.70 (d,  $J$  = 19.7 Hz, 6H), 1.22 (d,  $J$  = 7.9 Hz, 3H);  $^{13}\text{C}$  NMR (151 MHz, Chloroform-*d*)  $\delta$  199.98, 144.51, 134.05, 129.52, 128.52, 90.72, 46.44, 24.38, 21.60, 14.21.

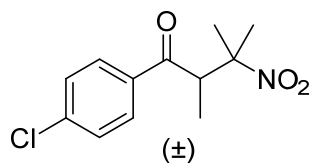

### 1-(4-Chlorophenyl)-2,3-dimethyl-3-nitrobutan-1-one (3l'a)

White solid (253 mg, 83% yield);  $R_f$  = 0.22 (20:1 hexanes/AcOEt); m.p. 122.0–122.8 °C;  $^1\text{H}$  NMR (400 MHz, Chloroform-*d*)  $\delta$  7.97 – 7.86 (m, 2H), 7.50 – 7.44 (m, 2H), 4.33 (q,  $J$  = 7.3 Hz, 1H), 1.71 (d,  $J$  = 6.7 Hz, 6H), 1.24 (d,  $J$  = 7.2 Hz, 3H);  $^{13}\text{C}$  NMR (101 MHz, Chloroform-*d*)  $\delta$  199.30, 140.11, 134.77, 129.78, 129.17, 90.61, 46.59, 24.27, 14.21.

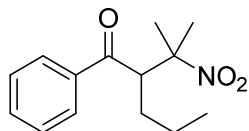

**2-(2-Nitropropan-2-yl)-1-phenylpentan-1-one (3m'a)**

$^1\text{H}$  NMR (600 MHz, Chloroform-*d*)  $\delta$  8.02 (d,  $J = 7.0$  Hz, 2H), 7.69 – 7.57 (m, 1H), 7.51 (t,  $J = 7.8$  Hz, 2H), 4.44 (dd,  $J = 11.0, 3.0$  Hz, 1H), 1.92 (dddd,  $J = 12.9, 11.0, 9.2, 5.7$  Hz, 1H), 1.71 (s, 3H), 1.53 (s, 3H), 1.34 (dt,  $J = 6.7, 3.4$  Hz, 1H), 1.25 (s, 2H), 0.84 (t,  $J = 7.3$  Hz, 3H);  $^{13}\text{C}$  NMR (151 MHz, Chloroform-*d*)  $\delta$  201.07, 138.50, 133.70, 128.91, 128.44, 90.95, 51.35, 31.74, 26.13, 22.10, 21.19, 14.05; IR (film)  $\nu_{\text{max}}$  2957, 1680, 1537, 1180, 1142, 1076  $\text{cm}^{-1}$ ; HRMS (ESI-TOF)  $m/z$ :  $[\text{M} + \text{Na}]^+$  Calcd for  $\text{C}_{14}\text{H}_{19}\text{NO}_3\text{Na}$  272.1257; Found 272.1260.

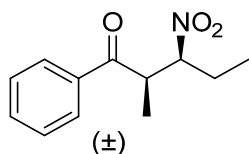

**(2*R*,3*S*)-2-Methyl-3-nitro-1-phenylpentan-1-one (3j'l)<sup>64</sup>**

Colorless oil (197 mg, 75% yield);  $R_f = 0.35$  (10:1 hexanes/AcOEt);  $^1\text{H}$  NMR (600 MHz, Chloroform-*d*)  $\delta$  7.98 (dd,  $J = 8.4, 1.3$  Hz, 2H), 7.60 (t,  $J = 7.4$  Hz, 1H), 7.51 – 7.48 (m, 2H), 4.99 – 4.94 (m, 1H), 4.18 (dd,  $J = 9.5, 7.3$  Hz, 1H), 2.15 (s, 1H), 1.99 – 1.93 (m, 1H), 1.24 (d,  $J = 7.3$  Hz, 3H), 1.02 (t,  $J = 7.4$  Hz, 3H);  $^{13}\text{C}$  NMR (151 MHz, Chloroform-*d*)  $\delta$  200.31, 135.07, 133.63, 128.84, 128.49, 89.33, 42.41, 23.87, 14.22, 9.33.

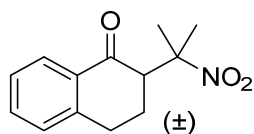

**2-(2-Nitropropan-2-yl)-3,4-dihydronaphthalen-1(2H)-one (3n'a)**

Colorless oil (172 mg, 62% yield);  $R_f = 0.15$  (10:1 hexanes/AcOEt);  $^1\text{H}$  NMR (400 MHz, Chloroform-*d*)  $\delta$  7.97 (d,  $J = 7.9$  Hz, 1H), 7.49 (t,  $J = 7.5$  Hz, 1H), 7.29 (d,  $J = 20.0$  Hz, 3H), 3.57 (dd,  $J = 13.9, 3.9$  Hz, 1H), 3.22 – 3.01 (m, 2H), 2.16 (d,  $J = 9.9$  Hz, 1H), 2.00 (s, 1H), 1.73 (s, 3H), 1.65 (s, 3H);  $^{13}\text{C}$  NMR (101 MHz, Chloroform-*d*)  $\delta$  195.54, 143.07, 133.71, 132.55, 128.56, 127.61, 126.90, 88.69, 77.20, 54.85, 29.50, 25.69, 25.35, 22.37; IR (film)  $\nu_{\text{max}}$  2924, 2365, 1543, 1181, 1140, 1074, 554  $\text{cm}^{-1}$ ; HRMS (ESI-TOF)  $m/z$ :  $[\text{M} + \text{Na}]^+$  Calcd for  $\text{C}_{13}\text{H}_{15}\text{NO}_3\text{Na}$  256.0944; Found 256.0937.

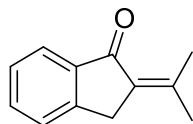

**2-(Propan-2-ylidene)-2,3-dihydro-1H-inden-1-one (3o'a)<sup>65</sup>**

Colorless oil (168 mg, 82% yield);  $R_f = 0.33$  (10:1 hexanes/AcOEt);  $^1\text{H}$  NMR (400 MHz, Chloroform-*d*)  $\delta$  7.80 (d,  $J = 7.6$  Hz, 1H), 7.55 (td,  $J = 7.4, 1.3$  Hz, 1H), 7.46 (d,  $J = 7.6$  Hz, 1H), 7.37 (t,  $J = 7.9$  Hz, 1H), 3.65 (s, 2H), 2.44 (s, 3H), 2.01 (s, 3H);  $^{13}\text{C}$  NMR (151 MHz, Chloroform-*d*)  $\delta$  194.02, 149.64, 147.85, 140.37, 133.67, 130.42, 127.16, 125.90, 123.89, 32.22, 24.53, 20.43.

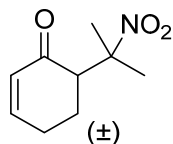

### 6-(2-Nitropropan-2-yl)cyclohex-2-en-1-one (3p'a)

White solid (112 mg, 51% yield);  $R_f = 0.3$  (10:1 hexanes/AcOEt); m.p. 82.1–83.2 °C;  $^1\text{H NMR}$  (600 MHz, Chloroform-*d*)  $\delta$  6.97 – 6.93 (m, 1H), 5.99 (dt,  $J = 10.0, 2.0$  Hz, 1H), 3.37 (dd,  $J = 14.2, 4.0$  Hz, 1H), 2.54 – 2.47 (m, 2H), 2.02 – 1.98 (m, 1H), 1.89 – 1.82 (m, 1H), 1.70 (s, 3H), 1.58 (d,  $J = 8.1$  Hz, 3H);  $^{13}\text{C NMR}$  (151 MHz, Chloroform-*d*)  $\delta$  196.66, 149.16, 130.19, 88.68, 29.69, 26.40, 25.09, 24.51, 22.91; IR (film)  $\nu_{\text{max}}$  3418, 2388, 1615, 1397  $\text{cm}^{-1}$ ; HRMS (ESI-TOF)  $m/z$ :  $[\text{M} + \text{Na}]^+$  Calcd for  $\text{C}_9\text{H}_{13}\text{NO}_3\text{Na}$  206.0787; Found 206.0788.

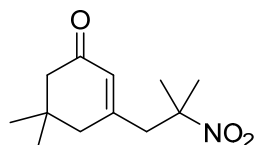

### 5,5-Dimethyl-3-(2-methyl-2-nitropropyl)cyclohex-2-en-1-one (3q'a)

Colorless oil (156 mg, 58% yield);  $R_f = 0.2$  (10:1 hexanes/AcOEt);  $^1\text{H NMR}$  (400 MHz, Chloroform-*d*)  $\delta$  5.85 (s, 1H), 2.81 (s, 2H), 2.19 (s, 2H), 2.07 (s, 2H), 1.61 (s, 6H), 1.00 (s, 6H);  $^{13}\text{C NMR}$  (151 MHz, Chloroform-*d*)  $\delta$  199.27, 155.98, 129.52, 86.99, 50.79, 48.33, 44.20, 33.78, 28.10, 26.35; IR (film)  $\nu_{\text{max}}$  2959, 1670, 1539, 1468, 1371, 1180, 1139, 1074  $\text{cm}^{-1}$ ; HRMS (ESI-TOF)  $m/z$ :  $[\text{M} + \text{H}]^+$  Calcd for  $\text{C}_{12}\text{H}_{20}\text{NO}_3$  226.1437; Found 226.1432.

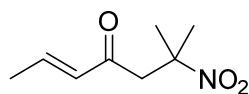

### (E)-6-Methyl-6-nitrohept-2-en-4-one (3r'a)

Colorless oil (165 mg, 81% yield);  $R_f = 0.17$  (10:1 hexanes/AcOEt);  $^1\text{H NMR}$  (600 MHz, Chloroform-*d*)  $\delta$  6.86 (dd,  $J = 15.7, 6.9$  Hz, 1H), 6.09 (dt,  $J = 15.8, 1.6$  Hz, 1H), 3.20 (s, 2H), 1.89 (dd,  $J = 6.9, 1.6$  Hz, 3H), 1.66 (s, 6H);  $^{13}\text{C NMR}$  (101 MHz, Chloroform-*d*)  $\delta$  194.71, 143.94, 131.47, 84.90, 48.30, 26.40, 18.22; IR (film)  $\nu_{\text{max}}$  2918.42, 1543.12, 1132.26, 1076.33, 630.75  $\text{cm}^{-1}$ ; HRMS (ESI-TOF)  $m/z$ :  $[\text{M} + \text{Na}]^+$  Calcd for  $\text{C}_8\text{H}_{13}\text{NO}_3\text{Na}$  194.0787; Found 194.0790.

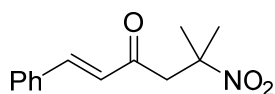

### (E)-5-Methyl-5-nitro-1-phenylhex-1-en-3-one (3s'a)

Colorless oil (217 mg, 78% yield);  $R_f = 0.17$  (10:1 hexanes/AcOEt);  $^1\text{H NMR}$  (600 MHz, Chloroform-*d*)  $\delta$  7.58 – 7.54 (m, 3H), 7.42 – 7.40 (m, 2H), 6.73 (s, 1H), 6.70 (s, 1H), 3.35 (s, 2H), 1.73 (s, 6H);  $^{13}\text{C NMR}$  (151 MHz, Chloroform-*d*)  $\delta$  194.70, 134.05, 130.88, 129.03, 128.43, 128.18, 125.64, 85.21, 49.26, 26.50; IR (film)  $\nu_{\text{max}}$  2922.28, 1541.19, 1076.33, 555.52  $\text{cm}^{-1}$ ; HRMS (ESI-TOF)  $m/z$ :  $[\text{M} + \text{Na}]^+$  Calcd for  $\text{C}_{13}\text{H}_{15}\text{NO}_3\text{Na}$  256.0944; Found 256.0950.

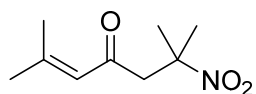

### 2,6-Dimethyl-6-nitrohept-2-en-4-one (3t'a)<sup>66</sup>

Colorless oil (170 mg, 77% yield);  $R_f = 0.22$  (20:1 hexanes/AcOEt);  $^1\text{H NMR}$  (600 MHz, Chloroform-*d*)  $\delta$  6.00 (d,  $J = 1.3$  Hz, 1H), 3.07 (s, 2H), 2.12 (s, 3H), 1.88 (s, 3H), 1.65 (s, 6H);  $^{13}\text{C NMR}$  (151 MHz, Chloroform-*d*)  $\delta$  195.06, 157.84, 123.17, 52.14, 27.78, 26.42, 20.92.

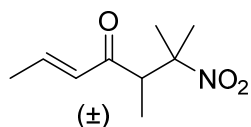

#### (*E*)-5,6-Dimethyl-6-nitrohept-2-en-4-one (3u'a)

Colorless oil (172 mg, 78% yield);  $R_f = 0.25$  (10:1 hexanes/AcOEt);  $^1\text{H NMR}$  (600 MHz, Chloroform-*d*)  $\delta$  6.94 (dd,  $J = 15.6, 6.9$  Hz, 1H), 6.19 (d,  $J = 15.6$  Hz, 1H), 3.64 (d,  $J = 7.2$  Hz, 1H), 1.92 (d,  $J = 6.9$  Hz, 3H), 1.63 (d,  $J = 3.6$  Hz, 6H), 1.13 (d,  $J = 7.2$  Hz, 3H);  $^{13}\text{C NMR}$  (101 MHz, Chloroform-*d*)  $\delta$  199.03, 144.37, 131.02, 90.29, 49.76, 23.92, 23.61, 18.29, 13.22; IR (film)  $\nu_{\text{max}}$  1385, 1180, 1142, 1074, 918, 636, 547  $\text{cm}^{-1}$ ; HRMS (ESI-TOF)  $m/z$ :  $[\text{M} + \text{Na}]^+$  Calcd for  $\text{C}_9\text{H}_{15}\text{NO}_3\text{Na}$  208.0944; Found 208.0950.

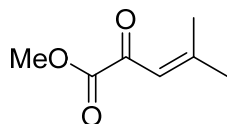

#### Methyl 4-methyl-2-oxopent-3-enoate (3v'a)

Colorless oil (105 mg, 62% yield);  $R_f = 0.25$  (10:1 hexanes/AcOEt);  $^1\text{H NMR}$  (600 MHz, Chloroform-*d*)  $\delta$  6.87 – 6.34 (m, 1H), 3.86 (s, 3H), 2.26 (s, 3H), 2.03 (d,  $J = 1.3$  Hz, 3H);  $^{13}\text{C NMR}$  (101 MHz, Chloroform-*d*)  $\delta$  181.58, 165.03, 162.93, 119.09, 52.82, 21.85.

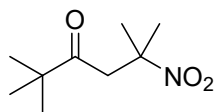

#### 2,2,5-Trimethyl-5-nitrohexan-3-one (3w'a)

Colorless oil (107 mg, 48% yield);  $R_f = 0.25$  (20:1 hexanes/AcOEt);  $^1\text{H NMR}$  (400 MHz, Chloroform-*d*)  $\delta$  3.18 (s, 2H), 1.66 (s, 6H), 1.15 (s, 9H);  $^{13}\text{C NMR}$  (151 MHz, Chloroform-*d*)  $\delta$  211.01, 84.77, 45.50, 44.32, 26.52, 26.22; IR (film)  $\nu_{\text{max}}$  2922, 1464, 1132, 1076  $\text{cm}^{-1}$ ; HRMS (ESI-TOF)  $m/z$ :  $[\text{M} + \text{Na}]^+$  Calcd for  $\text{C}_9\text{H}_{17}\text{NO}_3\text{Na}$  210.1106; Found 210.1102.

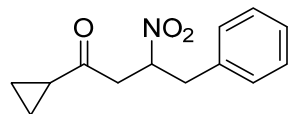

#### 1-Cyclopropyl-3-nitro-4-phenylbutan-1-one (3x'a)

Colorless oil (199 mg, 72% yield);  $R_f = 0.35$  (20:1 hexanes/AcOEt);  $^1\text{H NMR}$  (600 MHz, Chloroform-*d*)  $\delta$  7.34 – 7.31 (m, 2H), 7.29 (d,  $J = 7.2$  Hz, 1H), 7.18 – 7.16 (m, 2H), 5.17 (ddd,  $J = 15.4, 7.5, 4.4$  Hz, 1H), 3.40 (dd,  $J = 18.2, 8.8$  Hz, 1H), 3.31 (s, 1H), 3.14 (s, 1H), 2.88 (d,  $J = 18.2$  Hz, 1H), 1.90 (t,  $J = 4.5$  Hz, 1H), 1.07 – 1.02 (m, 2H), 0.96 – 0.89 (m, 2H);  $^{13}\text{C NMR}$  (151 MHz, Chloroform-*d*)  $\delta$  205.75, 134.88, 129.08, 128.94, 127.66, 83.31, 44.27, 39.62, 20.75, 11.45, 11.27; IR (film)  $\nu_{\text{max}}$  2924, 1699, 1551, 1451, 1393, 1180, 1138, 1074, 1018, 918  $\text{cm}^{-1}$ ; HRMS (ESI-TOF)  $m/z$ :  $[\text{M} + \text{Na}]^+$  Calcd for  $\text{C}_{13}\text{H}_{15}\text{NO}_3\text{Na}$  256.0944; Found 256.0941.

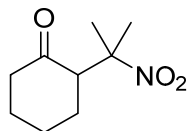

### 2-(2-Nitropropan-2-yl)cyclohexan-1-one (3y'a)

Colorless oil (130 mg, 59% yield);  $R_f = 0.17$  (10:1 hexanes/AcOEt);  $^1\text{H NMR}$  (400 MHz, Chloroform-*d*)  $\delta$  3.32 (dd,  $J = 13.3, 5.2$  Hz, 1H), 2.38 (dd,  $J = 10.6, 5.8$  Hz, 2H), 2.16 – 2.08 (m, 1H), 2.00 (s, 2H), 1.73 (m, 2H), 1.66 (s, 4H), 1.56 (s, 3H);  $^{13}\text{C NMR}$  (151 MHz, Chloroform-*d*)  $\delta$  208.12, 88.64, 57.23, 42.72, 29.68, 27.58, 25.27, 24.76, 22.73; IR (film)  $\nu_{\text{max}}$  2924, 1699, 1551, 1451, 1393, 1180, 1138, 1074, 1018, 918  $\text{cm}^{-1}$ ; HRMS (ESI-TOF)  $m/z$ :  $[\text{M} + \text{Na}]^+$  Calcd for  $\text{C}_{13}\text{H}_{15}\text{NO}_3\text{Na}$  256.0944; Found 256.0941.

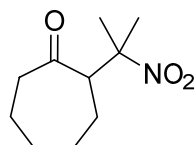

### 2-(2-Nitropropan-2-yl)cycloheptan-1-one (3z'a)

Colorless oil (171 mg, 72% yield);  $R_f = 0.18$  (10:1 hexanes/AcOEt);  $^1\text{H NMR}$  (600 MHz, Chloroform-*d*)  $\delta$  3.46 (dd,  $J = 10.9, 2.5$  Hz, 1H), 2.65 – 2.58 (m, 1H), 2.42 (dd,  $J = 11.8, 4.6$  Hz, 1H), 1.98 – 1.90 (m, 3H), 1.66 (s, 7H), 1.60 (s, 3H), 1.49 – 1.42 (m, 1H), 1.35 (d,  $J = 11.1$  Hz, 1H), 1.28 – 1.22 (m, 2H);  $^{13}\text{C NMR}$  (101 MHz, Chloroform-*d*)  $\delta$  211.74, 90.41, 57.14, 43.88, 29.46, 28.71, 27.55, 25.20, 23.53, 22.96; IR (film)  $\nu_{\text{max}}$  2924, 1699, 1551, 1451, 1393, 1180, 1138, 1074,  $\text{cm}^{-1}$ ; HRMS (ESI-TOF)  $m/z$ :  $[\text{M} + \text{Na}]^+$  Calcd for  $\text{C}_{10}\text{H}_{17}\text{NO}_3\text{Na}$  222.1106; Found 222.1102.

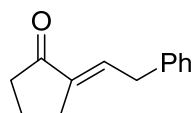

### (*E*)-2-(2-Phenylethylidene)cyclopentan-1-one (3a''m)

Colorless oil (131 mg, 59% yield);  $R_f = 0.14$  (10:1 hexanes/AcOEt);  $^1\text{H NMR}$  (400 MHz, Chloroform-*d*)  $\delta$  7.31 – 7.16 (m, 5H), 6.75 – 6.67 (m, 1H), 3.49 (d,  $J = 7.7$  Hz, 2H), 2.73 – 2.65 (m, 2H), 2.36 (t,  $J = 7.8$  Hz, 2H), 2.03 – 1.95 (m, 2H);  $^{13}\text{C NMR}$  (101 MHz, Chloroform-*d*)  $\delta$  207.09, 138.51, 137.75, 133.76, 128.67, 128.47, 126.48, 38.60, 35.81, 26.83, 19.76; IR (film)  $\nu_{\text{max}}$  2963, 1719, 1649, 1175, 1074, 698  $\text{cm}^{-1}$ ; HRMS (ESI-TOF)  $m/z$ :  $[\text{M} + \text{H}]^+$  Calcd for  $\text{C}_{13}\text{H}_{15}\text{O}$  187.1117; Found 187.1110.

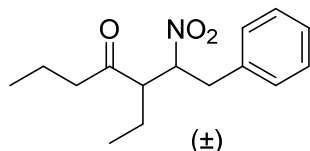

### 3-Ethyl-2-nitro-1-phenylheptan-4-one (3b''m)

Colorless oil (194 mg, 79% yield); *syn* : *anti* = 40 : 60.

***syn*-isomer:**  $R_f = 0.42$  (20:1 hexanes/AcOEt);  $^1\text{H NMR}$  (400 MHz, Chloroform-*d*)  $\delta$  7.29 – 7.22 (m, 3H), 7.14 – 7.10 (m, 2H), 4.99 (td,  $J = 10.4, 3.4$  Hz, 1H), 3.16 (ddd,  $J = 10.0, 6.3, 5.2$  Hz, 1H), 3.05 (d,  $J = 10.7$  Hz, 1H), 2.99 (d,  $J = 3.3$  Hz, 1H), 2.61 – 2.43 (m, 2H), 1.64 (dd,  $J = 7.4, 2.4$  Hz, 4H), 0.91 (dt,  $J = 31.0, 7.4$  Hz, 6H).  $^{13}\text{C NMR}$  (101 MHz, Chloroform-*d*)  $\delta$  209.66, 135.22, 128.77, 128.65, 127.50, 90.49, 55.15, 46.28, 38.40, 22.54, 16.67, 13.60, 10.07; IR (film)

$\nu_{\max}$  2967, 2932, 2878, 1711, 1551, 1458, 1375, 700  $\text{cm}^{-1}$ ; HRMS (ESI-TOF)  $m/z$ :  $[\text{M} + \text{Na}]^+$  Calcd for  $\text{C}_{15}\text{H}_{21}\text{NO}_3\text{Na}$  286.1413; Found 286.1416.

**anti-isomer:**  $R_f = 0.38$  (20:1 hexanes/AcOEt);  $^1\text{H}$  NMR (600 MHz, Chloroform-*d*)  $\delta$  7.32 – 7.26 (m, 3H), 7.13 – 7.09 (m, 2H), 5.04 – 4.99 (m, 1H), 3.29 (dd,  $J = 14.7, 3.9$  Hz, 1H), 3.21 (s, 1H), 3.08 (dd,  $J = 14.7, 8.8$  Hz, 1H), 2.55 – 2.40 (m, 2H), 1.86 – 1.75 (m, 2H), 1.60 – 1.54 (m, 2H), 0.90 (dt,  $J = 18.0, 7.5$  Hz, 6H);  $^{13}\text{C}$  NMR (101 MHz, Chloroform-*d*)  $\delta$  210.15, 134.77, 128.81, 127.60, 77.20, 53.52, 45.11, 36.89, 21.18, 16.55, 13.54, 10.32; IR (film)  $\nu_{\max}$  2967, 2932, 2878, 1711, 1551, 1458, 1375, 700  $\text{cm}^{-1}$ ; HRMS (ESI-TOF)  $m/z$ :  $[\text{M} + \text{Na}]^+$  Calcd for  $\text{C}_{15}\text{H}_{21}\text{NO}_3\text{Na}$  286.1413; Found 286.1416.

## 6. Conversions of coupling products

### 6.1 Gram-scale reaction

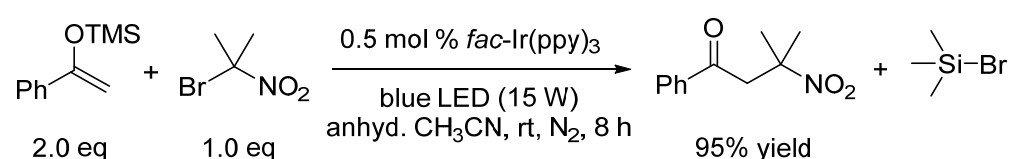

A Schlenk tube equipped with a stirring bar was evacuated and backfilled with  $\text{N}_2$  (three times). Geminal bromonitroalkane **2a** (1.00 g, 5.95 mmol), silyl enol ether of acetophenone **1a** (1.23 g, 11.9 mmol) and *fac*-Ir(ppy)<sub>3</sub> (20 mg, 0.50 % mmol) were placed. Then, anhydrous acetonitrile ( $\text{CH}_3\text{CN}$ , 20.0 mL) was added via a gastight syringe under  $\text{N}_2$  atmosphere. The reaction mixture was degassed by freeze-pump-thaw method and then stirred overnight under irradiation with blue LEDs (460 nm, app. 3.0 cm distance from the tube), maintained at approximately room temperature (25 °C) by a desk fan in the air-conditioned room. Upon completion, the mixture was concentrated under vacuum. The product was purified by flash column chromatography (petroleum ether/ethyl acetate = 50:1–10:1) on silica gel to give the product **3aa** (white solid, 1.17 g, 95% yield).

### 6.2 Conversions of 3aa and 3al

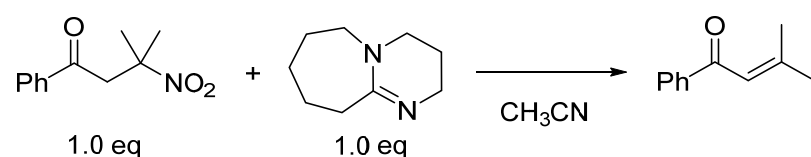

A Schlenk tube equipped with a stirring bar was evacuated and backfilled with  $\text{N}_2$  (three times). **3aa** (100 mg, 0.50 mmol) and DBU (75  $\mu\text{L}$ , 0.50 mmol) were added. Then, anhydrous acetonitrile ( $\text{CH}_3\text{CN}$ , 10 mL) was added via a gastight syringe under  $\text{N}_2$  atmosphere. The reaction mixture was stirred 5 h, and monitored by TLC. Upon completion, the mixture was concentrated under vacuum. The crude product was purified by flash column chromatography (petroleum ether/ethyl acetate = 10:1) on silica gel to give the product **4a** (colorless oil, 73 mg, 91% yield).

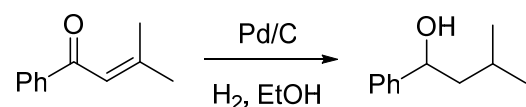

To a Schlenk tube were added **4a** (80 mg, 0.50 mmol), 10% Pd/C (30 mg in wet) and EtOH (15 mL). The mixture was well stirred under hydrogen atmosphere overnight. Pd/C was filtered and



washed with EtOH. The filtrate was concentrated and the residue dried in vacuo. The product was purified by flash column chromatography on silica gel to give 3-methyl-1-phenylbutan-1-ol **4b** as a colorless oil (petroleum ether/ethyl acetate = 2:1).

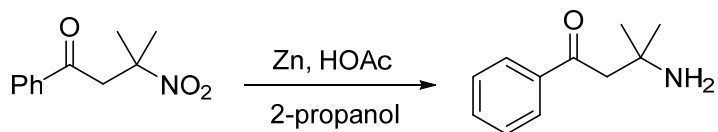

To a solution of **3aa** (100 mg, 0.50 mmol) in 2-propanol (2 mL) was added zinc dust (65 mg, 1.0 mmol) and acetic acid (0.15 mL) at room temperature. The resulting mixture was stirred for 6 h and then quenched with saturated aqueous NaHCO<sub>3</sub>. The solution was filtrated through Celite to remove zinc dust. The filtrate was extracted with CH<sub>2</sub>Cl<sub>2</sub>, and the extracts were washed with brine and dried over Na<sub>2</sub>SO<sub>4</sub>. After evaporation of solvents, the product **4c** was obtained in 82% yield (73 mg).

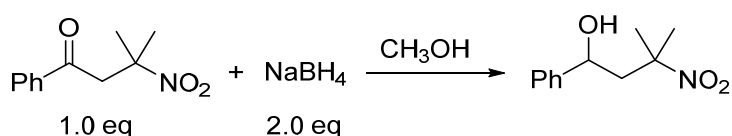

**3aa** (100 mg, 0.50 mmol) was added to a 100ml flame-dried round-bottomed flask containing methanol (20 mL), followed by NaBH<sub>4</sub> (38 mg, 1.0 mmol) in portions. After 3 h, the mixture was concentrated under vacuum, diluted by water and extracted with DCM (3 × 10 mL). The organic layers were combined and concentrated under vacuum. The product **4d** was purified by flash column chromatography on silica (petroleum ether/ethyl acetate = 10:1–5:1).

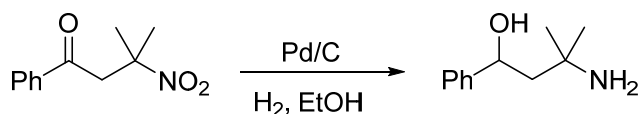

To a transparent Schlenk tube were added **3aa** (100 mg, 0.5 mmol), 10% Pd/C (30 mg in wet), and EtOH (15 mL). The mixture was well stirred under hydrogen atmosphere overnight. Pd/C was filtered and washed with EtOH. The filtrate was concentrated and the residue dried in vacuo. The yield of crude **4e** was 87%. The product was purified by flash column chromatography on silica gel (ethyl acetate/methanol = 1:1).

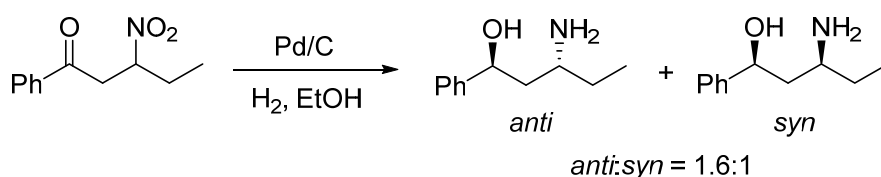

To a Schlenk tube were added **3al** (100 mg, 0.50 mmol), 10% Pd/C (30 mg in wet) and EtOH (15 mL). The mixture was well stirred under hydrogen atmosphere overnight. Pd/C was filtered and washed with EtOH. The filtrate was concentrated and the residue dried in vacuo. The yield of crude **4f** was 83%. The product was purified by flash column chromatography on silica gel (ethyl acetate/methanol = 1:1).

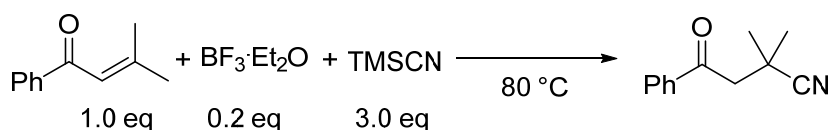

To a solution of **4a** (100 mg, 0.50 mmol) and TMSCN (0.2 mL, 1.5 mmol) was slowly added  $\text{BF}_3 \cdot \text{Et}_2\text{O}$  (15  $\mu\text{L}$ , 0.10 mmol) at room temperature, the mixture was stirred at 80 °C for 12 h. After being cooled to 0 °C, the reaction was carefully quenched with saturated  $\text{NaHCO}_3$  solution (5 mL) and extracted with ethyl acetate (3  $\times$  10 mL). The combined organic extracts were dried over anhydrous  $\text{Na}_2\text{SO}_4$  and concentrated in vacuo. The product **4g** was purified by flash column chromatography on silica (petroleum ether/ethyl acetate = 50:1–8:1).

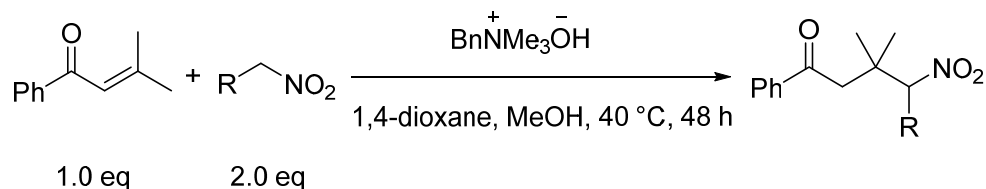

To a solution of nitroalkane (2.00 mmol), **4a** (200 mg, 1.00 mmol) in 1,4-dioxane (1 mL) was added a solution of benzyltrimethylammonium hydroxide (0.15 mL, 40% in MeOH) at ambient temperature. The solution was stirred at 40 °C for 48 h until completion of reaction. The reaction mixture was concentrated in vacuo to give a residue. The crude product was purified by flash column chromatography using 10:1 hexanes/AcOEt to give the product **4h** or **4i** as a colorless oil.

## 6.2 Physical data

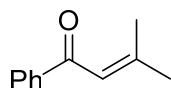

### 3-Methyl-1-phenylbut-2-en-1-one (**4a**)<sup>65</sup>

Yellow oil (73 mg, 91% yield);  $R_f = 0.7$  (20:1 hexanes/AcOEt);  $^1\text{H NMR}$  (400 MHz, Chloroform-*d*)  $\delta$  7.97 – 7.83 (m, 2H), 7.53 – 7.39 (m, 3H), 6.79 – 6.67 (m, 1H), 2.20 (d,  $J = 1.3$  Hz, 3H), 2.00 (d,  $J = 1.3$  Hz, 3H);  $^{13}\text{C NMR}$  (101 MHz, Chloroform-*d*)  $\delta$  191.35, 156.51, 139.18, 132.15, 128.32, 128.07, 121.09, 27.85, 21.04.

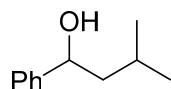

### 3-Methyl-1-phenylbutan-1-ol (**4b**)<sup>67</sup>

Colorless oil (66 mg, 80% yield);  $R_f = 0.1$  (10:1 hexanes/AcOEt);  $^1\text{H NMR}$  (400 MHz, Chloroform-*d*)  $\delta$  7.37 – 7.26 (m, 5H), 4.75 (dd,  $J = 8.2, 5.4$  Hz, 1H), 1.98 (br, 1H), 1.71 (d,  $J = 6.3$  Hz, 2H), 1.52 (s, 1H), 0.97 (dd,  $J = 6.5, 2.5$  Hz, 6H);  $^{13}\text{C NMR}$  (151 MHz, Chloroform-*d*)  $\delta$  145.21, 128.42, 127.44, 125.84, 72.74, 48.31, 24.75, 23.08, 22.22.

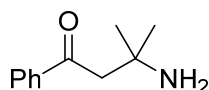

### 3-Amino-3-methyl-1-phenylbutan-1-one (**4c**)<sup>68</sup>

Colorless oil (73 mg, 80% yield);  $R_f = 0.1$  (10:1 hexanes/AcOEt);  $^1\text{H NMR}$  (600 MHz, Chloroform-*d*)  $\delta$  7.93 (d,  $J = 8.3$  Hz, 2H), 7.59 (d,  $J = 7.4$  Hz, 1H), 7.47 (t,  $J = 7.7$  Hz, 2H), 3.28 (s, 2H), 1.47 (s, 6H);  $^{13}\text{C NMR}$  (101 MHz, Chloroform-*d*)  $\delta$  199.03, 136.42, 133.97, 128.74, 128.23, 53.78, 45.53, 26.12.

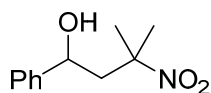

**3-Methyl-3-nitro-1-phenylbutan-1-ol (4d)**<sup>69</sup>

Colorless oil (108 mg, 93% yield);  $R_f$  = 0.3 (5:1 hexanes/AcOEt);  $^1\text{H}$  NMR (600 MHz, Chloroform-*d*)  $\delta$  7.37 – 7.28 (m, 5H), 4.82 (dd,  $J$  = 10.0, 2.8 Hz, 1H), 2.53 (dd,  $J$  = 15.1, 10.0 Hz, 1H), 2.16 (dd,  $J$  = 15.1, 2.8 Hz, 1H), 1.70 (d,  $J$  = 9.8 Hz, 6H);  $^{13}\text{C}$  NMR (101 MHz, Chloroform-*d*)  $\delta$  144.19, 128.73, 128.03, 125.54, 87.08, 71.10, 48.78, 27.08, 25.92; ; IR (film)  $\nu_{\text{max}}$  2990, 2930, 1537, 1458, 1384, 1358, 1132, 1063, 756, 700  $\text{cm}^{-1}$ ; HRMS (ESI-TOF)  $m/z$ :  $[\text{M} + \text{Na}]^+$  Calcd for  $\text{C}_{11}\text{H}_{15}\text{NONa}$  232.0944; Found 232.0948.

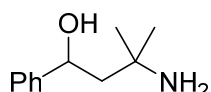

**3-Amino-3-methyl-1-phenylbutan-1-ol (4e)**<sup>70</sup>

Colorless oil (54 mg, 60% yield);  $R_f$  = 0.1 (10:1 hexanes/AcOEt);  $^1\text{H}$  NMR (400 MHz, Chloroform-*d*)  $\delta$  7.35 (dd,  $J$  = 16.0, 7.1 Hz, 3H), 7.26 (s, 2H), 5.02 (d,  $J$  = 11.2 Hz, 1H), 2.91 (s, 1H), 1.97 (s, 1H), 1.83 – 1.75 (m, 1H), 1.61 (dd,  $J$  = 14.6, 2.3 Hz, 1H), 1.39 (s, 3H), 1.25 (s, 3H);  $^{13}\text{C}$  NMR (151 MHz, Chloroform-*d*)  $\delta$  145.26, 128.29, 127.03, 125.64, 71.75, 51.50, 49.51, 34.10, 29.68, 26.25, 1.31.

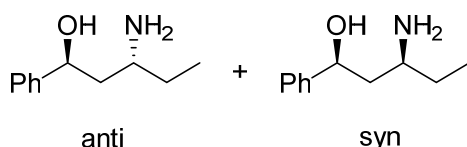

**anti: (1*S*,3*R*)-3-amino-1-phenylpentan-1-ol; syn: (1*S*,3*S*)-3-amino-1-phenylpentan-1-ol (4f)**<sup>70</sup>

Colorless oil (52 mg, 52% yield);  $R_f$  = 0.1 (10:1 hexanes/AcOEt);  $^1\text{H}$  NMR (600 MHz, Chloroform-*d*)  $\delta$  7.38 (d,  $J$  = 8.2 Hz, 3H), 7.33 (td,  $J$  = 7.6, 3.8 Hz, 3H), 7.26 (s, 1H), 5.11 – 5.05 (m, 1H), 4.92 (dd,  $J$  = 10.6, 2.2 Hz, 1H), 2.93 (s, 1H), 2.83 (s, 1H), 1.86 – 1.75 (m, 3H), 1.54 – 1.29 (m, 6H), 0.92 (t,  $J$  = 7.5 Hz, 2H), 0.88 (t,  $J$  = 7.5 Hz, 3H);  $^{13}\text{C}$  NMR (151 MHz, Chloroform-*d*)  $\delta$  145.44, 128.23, 128.15, 126.98, 126.65, 125.63, 125.57, 75.56, 72.22, 50.44, 44.74, 42.49, 33.63, 31.08, 29.68, 10.22, 9.87.

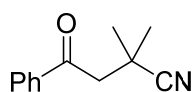

**2,2-Dimethyl-4-oxo-4-phenylbutanenitrile (4g)**<sup>71,72</sup>

White solid (78 mg, 83% yield);  $R_f$  = 0.2 (8:1 hexanes/AcOEt);  $^1\text{H}$  NMR (600 MHz, Chloroform-*d*)  $\delta$  7.94 (t,  $J$  = 7.5 Hz, 2H), 7.59 (t,  $J$  = 7.4 Hz, 1H), 7.51 – 7.46 (m, 2H), 3.25 (s, 2H), 1.54 (s, 6H);  $^{13}\text{C}$  NMR (151 MHz, Chloroform-*d*)  $\delta$  195.16, 136.48, 133.62, 128.75, 124.47, 47.43, 29.59, 26.92.

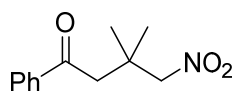

**3,3-Dimethyl-4-nitro-1-phenylbutan-1-one (4h)**<sup>73,74</sup>

Colorless oil (78 mg, 83% yield);  $R_f = 0.2$  (8:1 hexanes/AcOEt);  $^1\text{H NMR}$  (400 MHz, Chloroform-*d*)  $\delta$  7.95 – 7.91 (m, 2H), 7.61 – 7.55 (m, 1H), 7.46 (t,  $J = 7.6$  Hz, 2H), 4.71 (s, 2H), 3.14 (s, 2H), 1.24 (s, 6H);  $^{13}\text{C NMR}$  (101 MHz, Chloroform-*d*)  $\delta$  198.31, 137.46, 133.24, 128.64, 127.85, 83.58, 45.47, 34.48, 26.19.

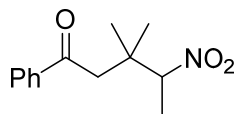

### 3,3-Dimethyl-4-nitro-1-phenylpentan-1-one (4i)<sup>73,74</sup>

Colorless oil (78 mg, 83% yield);  $R_f = 0.2$  (8:1 hexanes/AcOEt);  $^1\text{H NMR}$  (400 MHz, Chloroform-*d*)  $\delta$  7.95 – 7.88 (m, 2H), 7.56 (t,  $J = 7.4$  Hz, 1H), 7.46 (t,  $J = 7.6$  Hz, 2H), 5.17 (q,  $J = 6.8$  Hz, 1H), 3.20 (d,  $J = 17.1$  Hz, 1H), 2.90 (d,  $J = 17.2$  Hz, 1H), 1.52 (d,  $J = 6.8$  Hz, 3H), 1.18 (d,  $J = 21.8$  Hz, 6H);  $^{13}\text{C NMR}$  (101 MHz, Chloroform-*d*)  $\delta$  198.32, 137.67, 133.18, 128.62, 127.90, 88.90, 77.20, 45.53, 36.83, 24.27, 23.75, 13.84.

## 7. Radical-trapping experiments

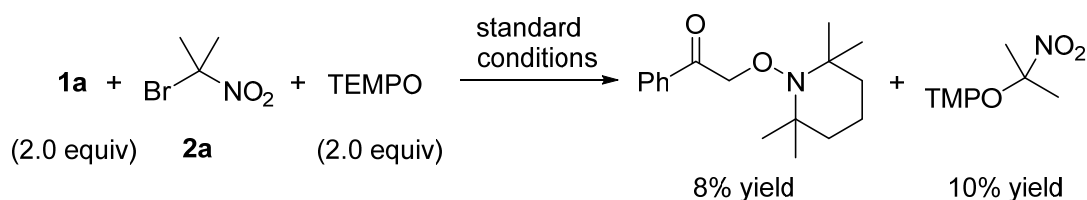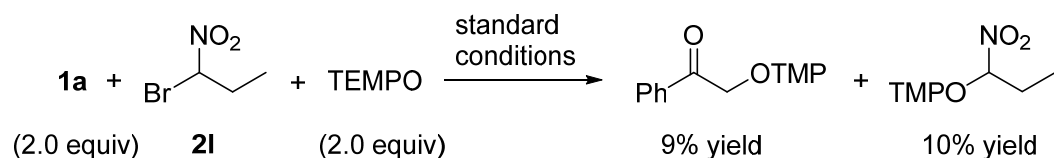

### 1-Phenyl-2-((2,2,6,6-tetramethylpiperidin-1-yl)oxy)ethan-1-one<sup>75</sup>

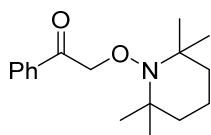

Following the general procedure, obtained in 9% yield (for **2l**) as a colorless liquid after silica gel chromatography.

Colorless oil (59 mg, 9% yield);  $R_f = 0.65$  (20:1 hexanes/AcOEt);  $^1\text{H NMR}$  (400 MHz, Chloroform-*d*)  $\delta$  7.95 – 7.89 (m, 2H), 7.54 (t,  $J = 7.4$  Hz, 1H), 7.44 (t,  $J = 7.6$  Hz, 2H), 5.10 (s, 2H), 1.45 (dd,  $J = 9.2, 4.0$  Hz, 6H), 1.16 (s, 12H);  $^{13}\text{C NMR}$  (101 MHz, Chloroform-*d*)  $\delta$  195.55, 135.23, 133.07, 128.41, 127.79, 81.15, 59.96, 39.55, 32.64, 32.15, 20.07, 16.87; IR (film)  $\nu_{max}$  2972, 2930, 1703, 1450, 1379, 1362, 1180, 1138, 1097, 1074, 972, 754, 690, 567  $\text{cm}^{-1}$ ; HRMS (ESI-TOF)  $m/z$ :  $[\text{M} + \text{H}]^+$  Calcd for  $\text{C}_{17}\text{H}_{26}\text{NO}_2$  276.1958; Found 276.1960.

### 2,2,6,6-Tetramethyl-1-(1-nitropropoxy)piperidine

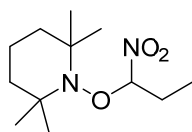

Following the general procedure, obtained in 10% yield as a reddish oil after silica gel

chromatography.

Reddish oil (29 mg, 10% yield);  $R_f = 0.7$  (20:1 hexanes/AcOEt);  $^1\text{H NMR}$  (400 MHz, Chloroform- $d$ )  $\delta$  5.61 – 5.52 (m, 1H), 2.27 – 1.93 (m, 2H), 1.52 (d,  $J = 43.1$  Hz, 6H), 1.15 (d,  $J = 9.4$  Hz, 9H), 0.93 (t,  $J = 7.5$  Hz, 6H);  $^{13}\text{C NMR}$  (101 MHz, Chloroform- $d$ )  $\delta$  94.13, 61.26, 59.55, 40.13, 39.86, 32.88, 31.72, 25.42, 20.05, 19.83, 16.65, 7.97, 0.00; IR (film)  $\nu_{\text{max}}$  2924, 1180, 1138, 1074  $\text{cm}^{-1}$ ; HRMS (ESI-TOF)  $m/z$ :  $[\text{M} + \text{H}]^+$  Calcd for  $\text{C}_{12}\text{H}_{24}\text{N}_2\text{O}_3$  245.1859; Found 245.1856.

## 8. Unsuccessful coupling reactions

### 8.1 Unsuccessful coupling reactants

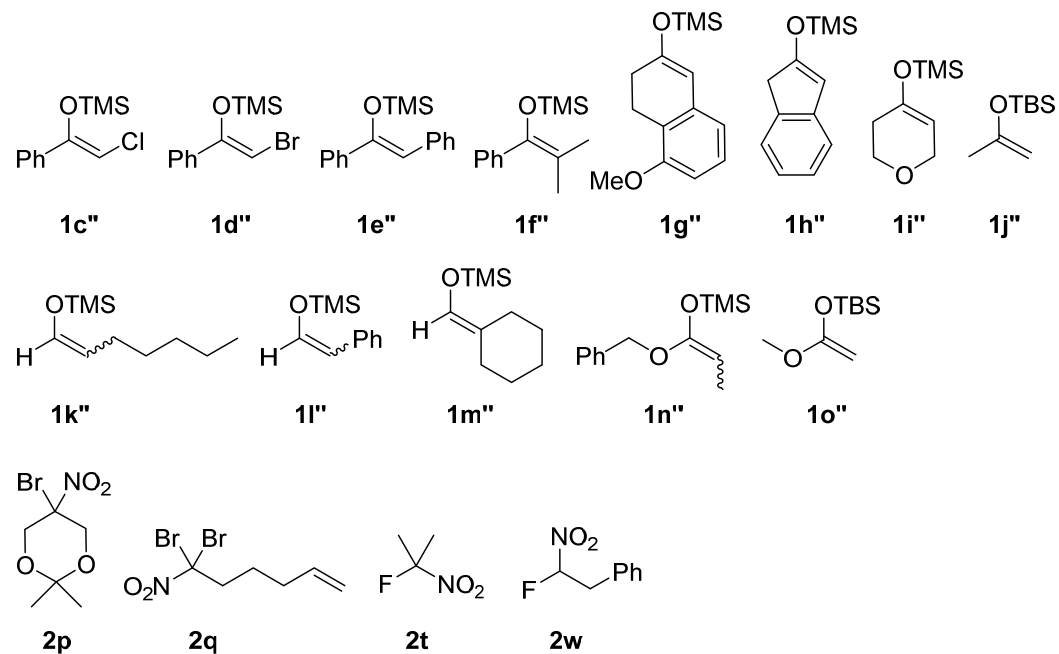

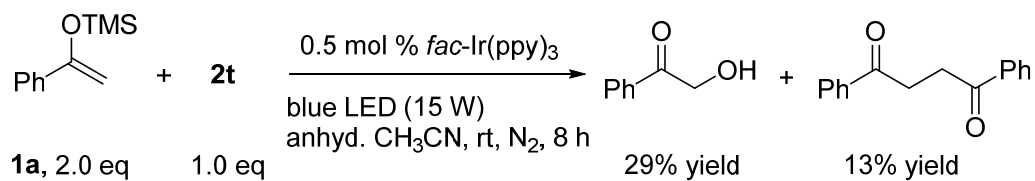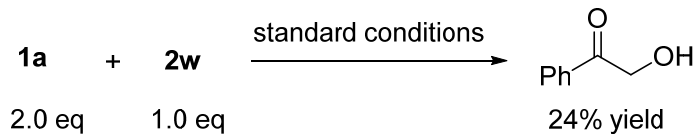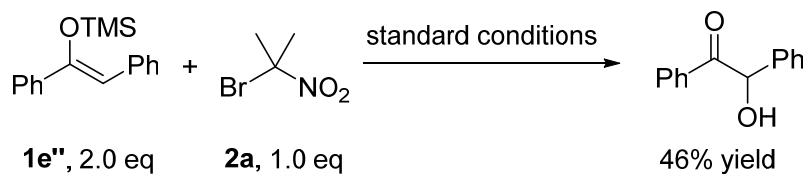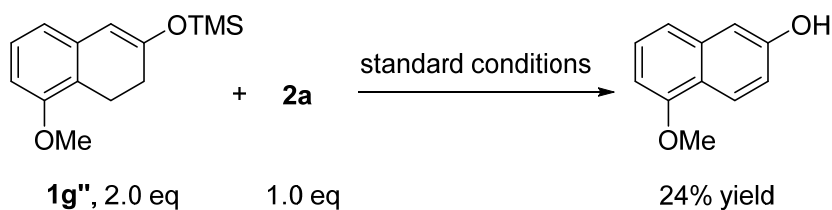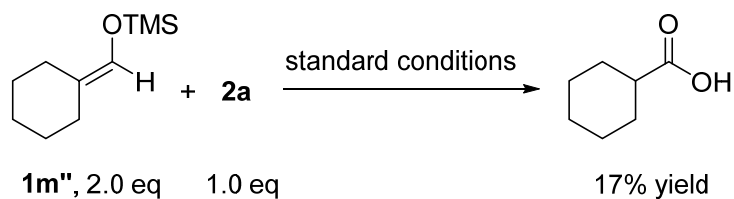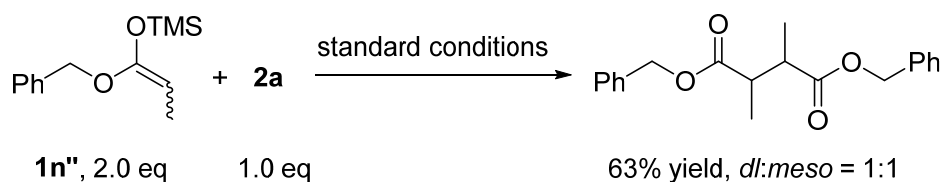

## 8.2 Physical data

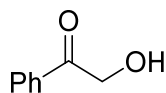

### 2-Hydroxy-1-phenylethan-1-one<sup>76</sup>

Colorless oil (94 mg, 29% yield);  $R_f$  = 0.3 (10:1 hexanes/AcOEt);  $^1\text{H NMR}$  (600 MHz, Chloroform-*d*)  $\delta$  8.03 (dd,  $J$  = 8.3, 1.3 Hz, 2H), 7.56 (d,  $J$  = 7.4 Hz, 1H), 7.47 (dd,  $J$  = 8.3, 7.2 Hz, 2H), 5.57 (s, 1H), 3.46 (s, 2H).

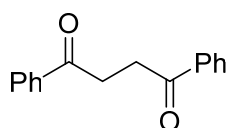

### 1,4-Diphenylbutane-1,4-dione<sup>77</sup>

White solid (37 mg, 13% yield);  $R_f = 0.65$  (20:1 hexanes/AcOEt);  $^1\text{H NMR}$  (600 MHz, Chloroform-*d*)  $\delta$  8.05 (dd,  $J = 8.3, 1.3$  Hz, 4H), 7.58 (t,  $J = 7.4$  Hz, 2H), 7.50 – 7.46 (m, 4H), 3.47 (s, 4H);  $^{13}\text{C NMR}$  (151 MHz, Chloroform-*d*)  $\delta$  198.72, 136.79, 133.16, 128.61, 128.13, 32.58.

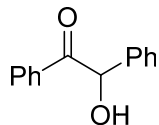

### 2-Hydroxy-1,2-diphenylethan-1-one<sup>78</sup>

White solid (232 mg, 46% yield);  $R_f = 0.2$  (10:1 hexanes/AcOEt);  $^1\text{H NMR}$  (400 MHz, Chloroform-*d*)  $\delta$  7.91 (dd,  $J = 8.5, 1.3$  Hz, 2H), 7.56 – 7.49 (m, 1H), 7.44 – 7.37 (m, 2H), 7.37 – 7.32 (m, 4H), 7.31 – 7.27 (m, 1H), 5.96 (s, 1H), 4.55 (d,  $J = 6.1$  Hz, 1H).

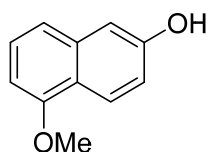

### 5-Methoxynaphthalen-2-ol<sup>79</sup>

Colorless oil (101 mg, 24% yield);  $R_f = 0.13$  (10:1 hexanes/AcOEt);  $^1\text{H NMR}$  (400 MHz, Chloroform-*d*)  $\delta$  8.17 (d,  $J = 9.0$  Hz, 1H), 7.38 – 7.30 (m, 1H), 7.27 (s, 1H), 7.14 – 7.02 (m, 2H), 6.67 (d,  $J = 7.5$  Hz, 1H), 5.09 (s, 1H), 3.98 (s, 3H).

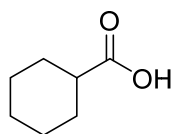

### Cyclohexanecarboxylic acid<sup>80</sup>

Colorless oil (52 mg, 17% yield);  $R_f = 0.2$  (10:1 hexanes/AcOEt);  $^1\text{H NMR}$  (400 MHz, Chloroform-*d*)  $\delta$  2.39 – 2.23 (m, 1H), 1.93 (dd,  $J = 13.3, 2.7$  Hz, 2H), 1.84 – 1.56 (m, 4H), 1.53 – 1.39 (m, 2H), 0.92 – 0.81 (m, 2H).

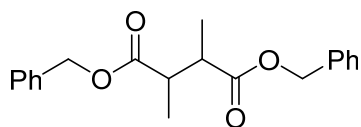

### Dibenzyl 2,3-dimethylsuccinate (*dl:meso* = 1:1)

Colorless oil (245 mg, 63% yield);  $R_f = 0.3$  (20:1 hexanes/AcOEt);  $^1\text{H NMR}$  (400 MHz, Chloroform-*d*)  $\delta$  7.38 – 7.29 (m, 10H), 5.08 (d,  $J = 4.7$  Hz, 4H), 2.88 (ddd,  $J = 21.9, 4.9, 2.1$  Hz, 2H), 1.19 (d,  $J = 6.2$  Hz, 6H);  $^{13}\text{C NMR}$  (101 MHz, Chloroform-*d*)  $\delta$  174.84, 174.16, 135.86, 135.76, 128.46, 128.18, 128.11, 128.08, 66.35, 66.32, 42.47, 41.60, 14.63, 13.58; IR (film)  $\nu_{\text{max}}$  2924, 1685, 1583, 1490, 1452, 1362, 1382, 1200, 1074, 709  $\text{cm}^{-1}$ ; HRMS (ESI-TOF)  $m/z$ :  $[\text{M} + \text{H}]^+$  Calcd for  $\text{C}_{12}\text{H}_{24}\text{N}_2\text{O}_3$  327.159; Found 327.1586.

## 9. References

(1) Cazeau, P.; Duboudin, F.; Moulines, F.; Babot, O.; Dunogues, J. A new practical synthesis of silyl enol ethers: Part.I. From simple aldehydes and ketones. *Tetrahedron* **1987**, *43*, 2075–2088.

- (2) Vil', V. A.; Gorlov, E. S.; Bityukov, O. V.; Barsegyan, Y. A.; Romanova, Y. E.; Merkulova, V. M.; Terent'Ev, A. O. C–O coupling of Malonyl Peroxides with Enol Ethers via [5+2] Cycloaddition: Non-Rubottom Oxidation. *Adv. Synth. Catal.* **2019**, *361*, 3173–3181.
- (3) Ramachary, D. B.; Narayana, V. V.; Ramakumar, K. A New One-Pot Synthetic Approach to the Highly Functionalized (Z)-2-(Buta-1,3-dienyl)phenols and 2-Methyl-2H-chromenes: Use of Amine, Ruthenium and Base-Catalysis. *Eur. J. Org. Chem.* **2008**, *2008*, 3907–3911.
- (4) Kuramochi, A.; Usuda, H.; Yamatsugu, K.; Kanai, M.; Shibasaki, M. Total Synthesis of (±)-Garsubellin A. *J. Am. Chem. Soc.* **2005**, *127*, 14200–14201.
- (5) Miyano, S.; Hokari, H.; Hashimoto, H. Carbon-Carbon Bond Formation by the Use of Chloriodomethane as a C1 Unit. III. A Convenient Synthesis of the Mannich Base from Enol Silyl Ether by a Combination of Chloriodomethane and N,N,N',N'-Tetramethylmethanediamine. *Bull. Chem. Soc. Jpn.* **1982**, *55*, 534–539.
- (6) Hu, Y.; Sun, W.; Zhang, T.; Xu, N.; Xu, J.; Lan, Y.; Liu, C. Stereoselective Synthesis of Trisubstituted Vinylboronates from Ketone Enolates Triggered by 1,3-Metalate Rearrangement of Lithium Enolates. *Angew. Chem., Int. Ed.* **2019**, *58*, 15813–15818.
- (7) Schnell, S. D.; Schilling, M.; Sklyaruk, J.; Linden, A.; Lubner, S.; Gademann, K. Nucleophilic Attack on Nitrogen in Tetrazines by Silyl-Enol Ethers. *Org. Lett.* **2021**, *23*, 2426–2430.
- (8) Racine, S.; de Nanteuil, F.; Serrano, E.; Waser, J. Synthesis of (Carbo)nucleoside Analogues by [3+2] Annulation of Aminocyclopropanes. *Angew. Chem., Int. Ed.* **2014**, *53*, 8484–8487.
- (9) Khan, I.; Reed-Berendt, B. G.; Melen, R. L.; Morrill, L. C. FLP-Catalyzed Transfer Hydrogenation of Silyl Enol Ethers. *Angew. Chem., Int. Ed.* **2018**, *57*, 12356–12359.
- (10) Morozzi, C.; Rosati, O.; Curini, M.; Lanari, D. A Solvent-Free Reaction for Silyl Enol Ethers Synthesis. *Synlett* **2018**, *29*, 126–130.
- (11) Zhao, B.; Shang, R.; Wang, G.; Wang, S.; Chen, H.; Fu, Y. Palladium-Catalyzed Dual Ligand-Enabled Alkylation of Silyl Enol Ether and Enamide under Irradiation: Scope, Mechanism, and Theoretical Elucidation of Hybrid Alkyl Pd(I)-Radical Species. *ACS Catal.* **2020**, *10*, 1334–1343.
- (12) Jiang, L.; Wang, Z.; Armstrong, M.; Suero, M. G.  $\beta$ -Diazocarbonyl Compounds: Synthesis and their Rh(II)-Catalyzed 1,3 C–H Insertions. *Angew. Chem., Int. Ed.* **2021**, *60*, 6177–6184.
- (13) Luo, Q.; Mao, R.; Zhu, Y.; Wang, Y. Photoredox-Catalyzed Generation of Sulfamyl Radicals: Sulfonamidation of Enol Silyl Ether with Chlorosulfonamide. *J. Org. Chem.* **2019**, *84*, 13897–13907.
- (14) Ji, M.; Wu, Z.; Zhu, C. Visible-light-induced consecutive C–C bond fragmentation and formation for the synthesis of elusive unsymmetric 1,8-dicarbonyl compounds. *Chem. Commun.* **2019**, *55*, 2368–2371.
- (15) Wei, S.; Du, H. A Highly Enantioselective Hydrogenation of Silyl Enol Ethers Catalyzed by Chiral Frustrated Lewis Pairs. *J. Am. Chem. Soc.* **2014**, *136*, 12261–12264.
- (16) Strehl, J.; Hilt, G. Electrochemical, Manganese-Assisted Carbon–Carbon Bond Formation between  $\beta$ -Keto Esters and Silyl Enol Ethers. *Org. Lett.* **2019**, *21*, 5259–5263.
- (17) Luo, Q.; Mao, R.; Zhu, Y.; Wang, Y. Photoredox-Catalyzed Generation of Sulfamyl Radicals: Sulfonamidation of Enol Silyl Ether with Chlorosulfonamide. *J. Org. Chem.* **2019**, *84*, 13897–13907.
- (18) Liu, J.; Xu, E.; Jiang, J.; Huang, Z.; Zheng, L.; Liu, Z. Copper-mediated tandem ring-opening/cyclization reactions of cyclopropanols with aryldiazonium salts: synthesis of N-arylpiperazines. *Chem. Commun.* **2020**, *56*, 2202–2205.
- (19) Guven, S.; Kundu, G.; Weßels, A.; Ward, J. S.; Rissanen, K.; Schoenebeck, F. Selective Synthesis of Z-Silyl Enol Ethers via Ni-Catalyzed Remote Functionalization of Ketones. *J. Am. Chem.*



*Soc.* **2021**, *143*, 8375–8380.

(20) Krafft, M. E.; Holton, R. A. The Kharasch reagent. Regioselective generation of dienyl ethers from enones. *J. Am. Chem. Soc.* **1984**, *106*, 7619–7621.

(21) Wan, C. S. K.; Weedon, A. C.; Wong, D. F. Stereoselective and regioselective thermal and photochemical preparation of siloxy dienes. *J. Org. Chem.* **1986**, *51*, 3335–3341.

(22) Laurent, M. Y.; Stocker, V.; Temgoua, V. M.; Dujardin, G.; Dhal, R. New two-step sequence involving a hetero-Diels–Alder and a nonphenolic oxidative coupling reaction: a convergent access to analogs of steganacin. *Tetrahedron Lett.* **2011**, *52*, 1608–1611.

(23) Leijondahl, K.; Borén, L.; Braun, R.; Bäckvall, J. Enantiopure 1,5-Diols from Dynamic Kinetic Asymmetric Transformation. Useful Synthetic Intermediates for the Preparation of Chiral Heterocycles. *Org. Lett.* **2008**, *10*, 2027–2030.

(24) Yong Gan, C.; N. Lambert, J. The tandem intermolecular Paternò–Büchi reaction: formation of tetrahydrooxepins. *J. Chem. Soc., Perkin Trans. 1* **1998**, 2363–2372.

(25) Siegel, D. S.; Piizzi, G.; Piersanti, G.; Movassaghi, M. Enantioselective Total Synthesis of (–)-Acylfulvene and (–)-Irofulven. *J. Org. Chem.* **2009**, *74*, 9292–9304.

(26) Hong, A. Y.; Krout, M. R.; Jensen, T.; Bennett, N. B.; Harned, A. M.; Stoltz, B. M. Ring-Contraction Strategy for the Practical, Scalable, Catalytic Asymmetric Synthesis of Versatile  $\gamma$ -Quaternary Acylcyclopentenones. *Angew. Chem., Int. Ed.* **2011**, *50*, 2756–2760.

(27) Khatri, B. B.; Sieburth, S. M. Enyne-2-pyrone [4 + 4]-Photocycloaddition: Sesquiterpene Synthesis and a Low-Temperature Cope Rearrangement. *Org. Lett.* **2015**, *17*, 4360–4363.

(28) Iida, A.; Osada, J.; Nagase, R.; Misaki, T.; Tanabe, Y. Mild and Efficient Pentafluorophenylammonium Triflate (PFPAT)-Catalyzed C-Acylation of Enol Silyl Ethers or Ketene Silyl (Thio)Acetals with Acid Chlorides. *Org. Lett.* **2007**, *9*, 1859–1862.

(29) Susanto, W.; Lam, Y. Oxidation reactions using polymer-supported 2-benzenesulfonyl-3-(4-nitrophenyl)oxaziridine. *Tetrahedron* **2011**, *67*, 8353–8359.

(30) Sugimoto, H.; Takeda, T.; Itoh, M.; Nakayama, Y.; Kobayashi, K. Photoinduced molecular transformations. Part 152. Ring expansion based on a sensitized [2 + 2] photoaddition of enol ethers of cyclic ketones with olefins, followed by a  $\beta$ -scission of alkoxy radicals generated from the resulting cyclobutanols. Two-carbon ring expansion of  $\beta$ -indanone,  $\beta$ -tetralone and  $\beta$ -suberone. *J. Chem. Soc., Perkin Trans. 1* **1995**, 49–61.

(31) Loy, N. S. Y.; Choi, S.; Kim, S.; Park, C. The synthesis of pyrroles and oxazoles based on gold  $\alpha$ -imino carbene complexes. *Chem. Commun.* **2016**, *52*, 7336–7339.

(32) Green, S. A.; Huffman, T. R.; McCourt, R. O.; van der Puyl, V.; Shenvi, R. A. Hydroalkylation of Olefins To Form Quaternary Carbons. *J. Am. Chem. Soc.* **2019**, *141*, 7709–7714.

(33) Aggarwal, V. K.; Eames, J.; de Las Heras, M. A.; McIntyre, S.; Warren, S. The scope and limitation of the [1,4]-SPh shift in the synthesis of allylic alcohols. *J. Chem. Soc., Perkin Trans. 1* **2000**, 4456–4461.

(34) Tobisu, M.; Takahira, T.; Morioka, T.; Chatani, N. Nickel-Catalyzed Alkylative Cross-Coupling of Anisoles with Grignard Reagents via C–O Bond Activation. *J. Am. Chem. Soc.* **2016**, *138*, 6711–6714.

(35) Anderson, T. E.; Andia, A. A.; Woerpel, K. A. Chemiluminescence-promoted oxidation of alkyl enol ethers by NHPI under mild conditions and in the dark. *Tetrahedron* **2021**, *82*, 131874.

(36) Kiyooka, S.; Matsumoto, S.; Shibata, T.; Shinozaki, K. Platinum(II) complex-catalyzed enantioselective aldol reaction with ketene silyl acetals in DMF at room temperature. *Tetrahedron* **2010**,

66, 1806–1816.

(37) Ai, W.; Liu, Y.; Wang, Q.; Lu, Z.; Liu, Q. Cu-Catalyzed Redox-Neutral Ring Cleavage of Cycloketone O-Acyl Oximes: Chemodivergent Access to Distal Oxygenated Nitriles. *Org. Lett.* **2018**, *20*, 409–412.

(38) Zhang, H.; Wei, Z.; Zhang, A. H.; Yu, S. Access to Cyanoimines Enabled by Dual Photoredox/Copper-Catalyzed Cyanation of O-Acyl Oximes. *Org. Lett.* **2020**, *22*, 7315–7320.

(39) Kornblum, N.; Wade, P. A. Mild, nonacidic, method for converting secondary nitro compounds into ketones. *J. Org. Chem.* **1973**, *38*, 1418–1420.

(40) Li, J.; Lear, M. J.; Kawamoto, Y.; Umemiya, S.; Wong, A. R.; Kwon, E.; Sato, I.; Hayashi, Y. Oxidative Amidation of Nitroalkanes with Amine Nucleophiles using Molecular Oxygen and Iodine. *Angew. Chem., Int. Ed.* **2015**, *54*, 12986–12990.

(41) Li, X.; Livant, P. D.; Chen, J. An Alkene-Forming Cascade Reaction En Route to 2,2'-Bi(glycerol). *Synlett* **2018**, *29*, 1769–1772.

(42) Hawkes, G. E.; Herwig, K.; Roberts, J. D. Nuclear magnetic resonance spectroscopy. Use of carbon-13 spectra to establish configurations of oximes. *J. Org. Chem.* **1974**, *39*, 1017–1028.

(43) Suzuki, K.; Watanabe, T.; Murahashi, S. Oxidation of Primary Amines to Oximes with Molecular Oxygen using 1,1-Diphenyl-2-picrylhydrazyl and WO<sub>3</sub>/Al<sub>2</sub>O<sub>3</sub> as Catalysts. *J. Org. Chem.* **2013**, *78*, 2301–2310.

(44) Maskill, H.; Thompson, J. T.; Wilson, A. A. Solvolysis of secondary alkyl azoxytosylates. A new reaction related to solvolytic deamination and arenesulphonate solvolysis. *J. Chem. Soc., Perkin Trans. 2* **1984**, 1693–1703.

(45) Augustine, J. K.; Kumar, R.; Bombrun, A.; Mandal, A. B. An efficient catalytic method for the Beckmann rearrangement of ketoximes to amides and aldoximes to nitriles mediated by propylphosphonic anhydride (T3P®). *Tetrahedron Lett.* **2011**, *52*, 1074–1077.

(46) Möller, M.; Hentschel, C.; Chi, L.; Studer, A. Aggregation behaviour of peptide–polymer conjugates containing linear peptide backbones and multiple polymer side chains prepared by nitroxide-mediated radical polymerization. *Org. Biomol. Chem.* **2011**, *9*, 2403–2412.

(47) Roscales, S.; Csáky, A. G. Transition-Metal-Free Three-Component Synthesis of Tertiary Aryl Amines from Nitro Compounds, Boronic Acids, and Trialkyl Phosphites. *Adv. Synth. Catal.* **2020**, *362*, 111–117.

(48) Marsh, G. P.; Parsons, P. J.; McCarthy, C.; Corniquet, X. G. An Efficient Synthesis of Nitroalkenes by Alkene Cross Metathesis: Facile Access to Small Ring Systems. *Org. Lett.* **2007**, *9*, 2613–2616.

(49) Hu, H.; Huang, Y.; Guo, Y. Henry reaction of fluorinated nitro compounds. *J. Fluorine Chem.* **2012**, *133*, 108–114.

(50) Banks, R. E.; Murtagh, V.; Tsiliopoulos, E. N-halogeno compounds. Part 12 [1]. Site-specific fluorination of carbanions with perfluoro-N-fluoropiperidine [2]. *J. Fluorine Chem.* **1991**, *52*, 389–401.

(51) Ilovaisky, A. I.; Merkulova, V. M.; Ogibin, Y. N.; Nikishin, G. I. Electrooxidative coupling of salts of nitro compounds with halide, nitrite, cyanide, and phenylsulfinate anions. *Russ. Chem. Bull.* **2005**, *54*, 1585–1592.

(52) Tajbakhsh, M.; Khazaei, A.; Mahalli, M. S.; Vaghi, R. G. N,N-DIBROMOBENZENESULFONAMIDE: A USEFUL REGENRABLE REAGENT FOR BROMINATION OF VARIOUS CARBANIONIC SUBSTRATES. *Phosphorus, Sulfur, and Silicon and the Related Elements* **2004**, *179*, 1159–1163.

- (53) Iffland, D. C.; Yen, T. Preparation of Nitro Compounds from Oximes. III. The Synthesis of Nitroalkanes. *J. Am. Chem. Soc.* **1954**, *76*, 4083–4085.
- (54) Curini, M.; Epifano, F.; Marcotullio, M. C.; Rosati, O.; Rossi, M. A new method for the one-step conversion of oximes into gem-halo-nitro derivatives. *Tetrahedron* **1999**, *55*, 6211–6218.
- (55) Walters, T. R.; Zajac, W. W.; Woods, J. M. New reagents for the synthesis of gem-halonitro compounds from oximes. *J. Org. Chem.* **1991**, *56*, 316–321.
- (56) Zaks, A.; Yabannavar, A. V.; Dodds, D. R.; Evans, C. A.; Das, P. R.; Malchow, R. A Novel Application of Chloroperoxidase: Preparation of gem-Halonitro Compounds. *J. Org. Chem.* **1996**, *61*, 8692–8695.
- (57) Erickson, A. S.; Kornblum, N. Monohalogenation of primary nitroparaffins. *J. Org. Chem.* **1977**, *42*, 3764–3765.
- (58) Shen, B.; Makley, D. M.; Johnston, J. N. Umpolung reactivity in amide and peptide synthesis. *Nature* **2010**, *465*, 1027–1032.
- (59) Kunetsky, R. A.; Dilman, A. D.; Ioffe, S. L.; Struchkova, M. I.; Strelenko, Y. A.; Tartakovskiy, V. A. New Approach for the Synthesis of Isoxazoline-N-oxides. *Org. Lett.* **2003**, *5*, 4907–4909.
- (60) Li, X.; Livant, P. D.; Chen, J. An Alkene-Forming Cascade Reaction En Route to 2,2'-Bi(glycerol). *Synlett* **2018**, *29*, 1769–1772.
- (61) Aitken, R. A.; Aitken, K. M. *Science of Synthesis*; Thieme Chemistry, 2010; Vol. 41.
- (62) Brändli, U.; Eyer, M.; Seebach, D. Regioselektive Erzeugung und diastereoselektive Umsetzungen in  $\beta$ -Stellung zur Nitrogruppe sekundärer Nitroalkane über  $\alpha,\beta$ -doppelt deprotonierte Derivate (Super-enamine). *Chem. Ber.* **1986**, *119*, 575–588.
- (63) Singh, P. N. D.; Mandel, S. M.; Sankaranarayanan, J.; Muthukrishnan, S.; Chang, M.; Robinson, R. M.; Lahti, P. M.; Ault, B. S.; Gudmundsdóttir, A. D. Selective Formation of Triplet Alkyl Nitrenes from Photolysis of  $\beta$ -Azido-Propiophenone and Their Reactivity. *J. Am. Chem. Soc.* **2007**, *129*, 16263–16272.
- (64) Gietter, A. A. S.; Gildner, P. G.; Cinderella, A. P.; Watson, D. A. General Route for Preparing  $\beta$ -Nitrocarbonyl Compounds Using Copper Thermal Redox Catalysis. *Org. Lett.* **2014**, *16*, 3166–3169.
- (65) Okamoto, K.; Hayashi, T. Platinum-Catalyzed Addition of Dimethylsilylene to  $\beta$ -Methyl  $\alpha,\beta$ -Unsaturated Ketones:  $\gamma$ -Silylation Forming 1-Oxa-2-silacyclohex-5-enes. *Org. Lett.* **2007**, *9*, 5067–5069.
- (66) Golubev, V. A.; Sen, V. D. Mechanism of autoreduction of 2,2,6,6-tetramethyl-1,4-dioxopiperidinium cation in alkaline medium. *Russ. J. Org. Chem.* **2011**, *47*, 869–876.
- (67) He, P.; Lu, Y.; Dong, C.; Hu, Q. Anionic Four-Electron Donor-Based Palladacycles as Catalysts for Addition Reactions of Arylboronic Acids with  $\alpha,\beta$ -Unsaturated Ketones, Aldehydes, and  $\alpha$ -Ketoesters. *Org. Lett.* **2007**, *9*, 343–346.
- (68) Shirakawa, S.; Ota, K.; Terao, S. J.; Maruoka, K. The direct catalytic asymmetric aldol reaction of  $\alpha$ -substituted nitroacetates with aqueous formaldehyde under base-free neutral phase-transfer conditions. *Org. Biomol. Chem.* **2012**, *10*, 5753–5755.
- (69) Mikhael, M.; Adler, S. A.; Wengryniuk, S. E. Chemoselective Oxidation of Equatorial Alcohols with N-Ligated  $\lambda^3$ -Iodanes. *Org. Lett.* **2019**, *21*, 5889–5893.
- (70) Hauske, J. R. Amide derivatives as agonists and antagonists of CB1 and GLP-1 receptors and their preparation, pharmaceutical compositions and use in the treatment of metabolic syndrome. WO 2009073138, 2008.
- (71) Nie, W.; Gong, J.; Chen, Z.; Liu, J.; Tian, D.; Song, H.; Liu, X.; Qin, Y. Enantioselective Total Synthesis of (–)-Arcutinine. *J. Am. Chem. Soc.* **2019**, *141*, 9712–9718.

(72) Zhang, X.; Huang, H. Copper-Catalyzed Oxidative Coupling of AIBN and Ketone-Derived Enoxysilanes to  $\gamma$ -Ketonitriles. *Org. Lett.* **2018**, *20*, 4998–5001.

(73) Lin, C.; Hong, B.; Chang, W.; Lee, G. A New Approach to Nitrones through Cascade Reaction of Nitro Compounds Enabled by Visible Light Photoredox Catalysis. *Org. Lett.* **2015**, *17*, 2314–2317.

(74) Lui, K.; Sammes, M. P. Synthesis and chemistry of azolenines. Part 16. Preparation of both 3H- and 2H-pyrroles from 2,2-disubstituted 1,4-diketones via the Paal-Knorr reaction, and isolation of intermediate 2-hydroxy-3,4-dihydro-2H-pyrroles. *J. Chem. Soc., Perkin Trans. I* **1990**, 457–468.

(75) Pouliot, M.; Renaud, P.; Schenk, K.; Studer, A.; Vogler, T. Oxidation of Catecholboron Enolates with TEMPO. *Angew. Chem., Int. Ed.* **2009**, *48*, 6037–6040.

(76) Baranac-Stojanović, M.; Marković, R.; Stojanović, M. Catalytic oxidations of enolizable ketones using 2-alkylidene-4-oxothiazolidine vinyl bromide. *Tetrahedron* **2011**, *67*, 8000–8008.

(77) Tanaka, K.; Shoji, T.; Hirano, M. Cationic Rhodium(I)/Bisphosphane Complex-Catalyzed Isomerization of Secondary Propargylic Alcohols to  $\alpha,\beta$ -Enones. *Eur. J. Org. Chem.* **2007**, *2007*, 2687–2699.

(78) Denmark, S. E.; Fan, Y. Catalytic, Enantioselective  $\alpha$ -Additions of Isocyanides: Lewis Base Catalyzed Passerini-Type Reactions. *J. Org. Chem.* **2005**, *70*, 9667–9676.

(79) Mitra, P.; Mandal, S.; Chakraborty, S.; Mal, D. Deleterious effect of 7-methyl group on glycosylation of 2-naphthols. *Tetrahedron* **2015**, *71*, 5610–5619.

(80) Schmidt, A. C.; Stark, C. B. W. TPAP-Catalyzed Direct Oxidation of Primary Alcohols to Carboxylic Acids through Stabilized Aldehyde Hydrates. *Org. Lett.* **2011**, *13*, 4164–4167.

## 10. Crystal data

CCDC numbers: 2107700 (**3aa**), 2107697 (**3ac**), 2108083 (**3ad**), 2107698 (**3ag**), 2107699 (**3an**), 2107696 (**3p'a**), 2109233 (**2,2,6,6-tetramethylpiperidine benzoylformate**)

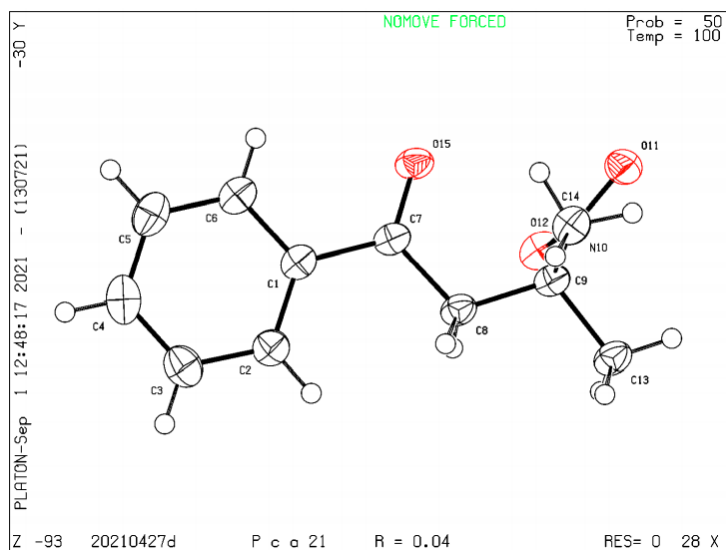

### Crystal data and structure refinement for 3aa.

|                                             |                                                               |
|---------------------------------------------|---------------------------------------------------------------|
| Temperature/K                               | 100.00(10)                                                    |
| Crystal system                              | orthorhombic                                                  |
| Space group                                 | Pca2 <sub>1</sub>                                             |
| a/Å                                         | 10.2718(2)                                                    |
| b/Å                                         | 9.7571(3)                                                     |
| c/Å                                         | 10.9209(3)                                                    |
| α/°                                         | 90                                                            |
| β/°                                         | 90                                                            |
| γ/°                                         | 90                                                            |
| Volume/Å <sup>3</sup>                       | 1094.53(5)                                                    |
| Z                                           | 4                                                             |
| ρ <sub>calc</sub> /cm <sup>3</sup>          | 0.261                                                         |
| μ/mm <sup>-1</sup>                          | 0.207                                                         |
| F(000)                                      | 88.0                                                          |
| Crystal size/mm <sup>3</sup>                | 0.5 × 0.2 × 0.05                                              |
| Radiation                                   | CuKα (λ = 1.54184)                                            |
| 2θ range for data collection/°              | 9.064 to 152.016                                              |
| Index ranges                                | -12 ≤ h ≤ 12, -12 ≤ k ≤ 12, -13 ≤ l ≤ 12                      |
| Reflections collected                       | 18887                                                         |
| Independent reflections                     | 2179 [R <sub>int</sub> = 0.0601, R <sub>sigma</sub> = 0.0273] |
| Data/restraints/parameters                  | 2179/1/138                                                    |
| Goodness-of-fit on F <sup>2</sup>           | 1.093                                                         |
| Final R indexes [I ≥ 2σ (I)]                | R <sub>1</sub> = 0.0356, wR <sub>2</sub> = 0.0975             |
| Final R indexes [all data]                  | R <sub>1</sub> = 0.0363, wR <sub>2</sub> = 0.0984             |
| Largest diff. peak/hole / e Å <sup>-3</sup> | 0.18/-0.17                                                    |
| Flack parameter                             | 0.17(12)                                                      |

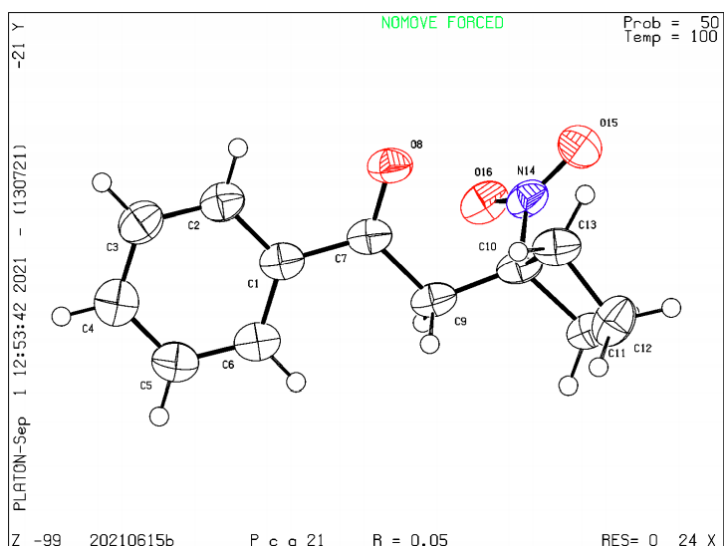

### Crystal data and structure refinement for 3ac.

|                                             |                                                               |
|---------------------------------------------|---------------------------------------------------------------|
| Temperature/K                               | 100(1)                                                        |
| Crystal system                              | orthorhombic                                                  |
| Space group                                 | Pca2 <sub>1</sub>                                             |
| a/Å                                         | 10.0228(5)                                                    |
| b/Å                                         | 9.8396(5)                                                     |
| c/Å                                         | 11.0400(5)                                                    |
| α/°                                         | 90                                                            |
| β/°                                         | 90                                                            |
| γ/°                                         | 90                                                            |
| Volume/Å <sup>3</sup>                       | 1088.77(9)                                                    |
| Z                                           | 4                                                             |
| ρ <sub>calc</sub> /cm <sup>3</sup>          | 1.337                                                         |
| μ/mm <sup>-1</sup>                          | 0.798                                                         |
| F(000)                                      | 464.0                                                         |
| Crystal size/mm <sup>3</sup>                | 0.4 × 0.15 × 0.05                                             |
| Radiation                                   | CuKα (λ = 1.54184)                                            |
| 2θ range for data collection/°              | 8.988 to 153.54                                               |
| Index ranges                                | -12 ≤ h ≤ 12, -12 ≤ k ≤ 12, -13 ≤ l ≤ 13                      |
| Reflections collected                       | 18412                                                         |
| Independent reflections                     | 2207 [R <sub>int</sub> = 0.0938, R <sub>sigma</sub> = 0.0357] |
| Data/restraints/parameters                  | 2207/1/146                                                    |
| Goodness-of-fit on F <sup>2</sup>           | 1.127                                                         |
| Final R indexes [I ≥ 2σ (I)]                | R <sub>1</sub> = 0.0540, wR <sub>2</sub> = 0.1557             |
| Final R indexes [all data]                  | R <sub>1</sub> = 0.0580, wR <sub>2</sub> = 0.1625             |
| Largest diff. peak/hole / e Å <sup>-3</sup> | 0.22/-0.31                                                    |
| Flack parameter                             | -0.1(2)                                                       |

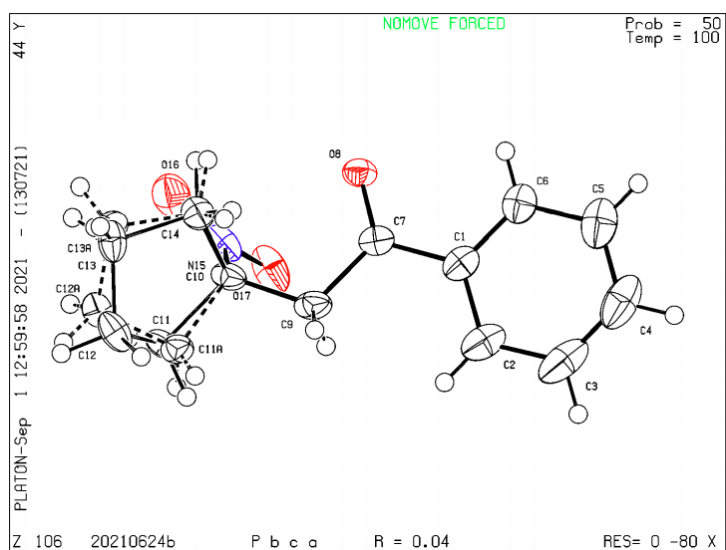

### Crystal data and structure refinement for 3ad.

|                                             |                                                               |
|---------------------------------------------|---------------------------------------------------------------|
| Temperature/K                               | 100(2)                                                        |
| Crystal system                              | orthorhombic                                                  |
| Space group                                 | Pbca                                                          |
| a/Å                                         | 10.15647(11)                                                  |
| b/Å                                         | 11.03134(15)                                                  |
| c/Å                                         | 20.7789(3)                                                    |
| $\alpha$ /°                                 | 90                                                            |
| $\beta$ /°                                  | 90                                                            |
| $\gamma$ /°                                 | 90                                                            |
| Volume/Å <sup>3</sup>                       | 2328.05(5)                                                    |
| Z                                           | 8                                                             |
| $\rho_{\text{calc}}/\text{cm}^3$            | 1.331                                                         |
| $\mu/\text{mm}^{-1}$                        | 0.778                                                         |
| F(000)                                      | 992.0                                                         |
| Crystal size/mm <sup>3</sup>                | 0.4 × 0.2 × 0.05                                              |
| Radiation                                   | CuK $\alpha$ ( $\lambda$ = 1.54184)                           |
| 2 $\theta$ range for data collection/°      | 8.51 to 152.284                                               |
| Index ranges                                | -12 ≤ h ≤ 12, -12 ≤ k ≤ 13, -24 ≤ l ≤ 26                      |
| Reflections collected                       | 20591                                                         |
| Independent reflections                     | 2397 [R <sub>int</sub> = 0.0412, R <sub>sigma</sub> = 0.0181] |
| Data/restraints/parameters                  | 2397/124/183                                                  |
| Goodness-of-fit on F <sup>2</sup>           | 1.069                                                         |
| Final R indexes [I ≥ 2 $\sigma$ (I)]        | R <sub>1</sub> = 0.0416, wR <sub>2</sub> = 0.1058             |
| Final R indexes [all data]                  | R <sub>1</sub> = 0.0450, wR <sub>2</sub> = 0.1084             |
| Largest diff. peak/hole / e Å <sup>-3</sup> | 0.29/-0.24                                                    |

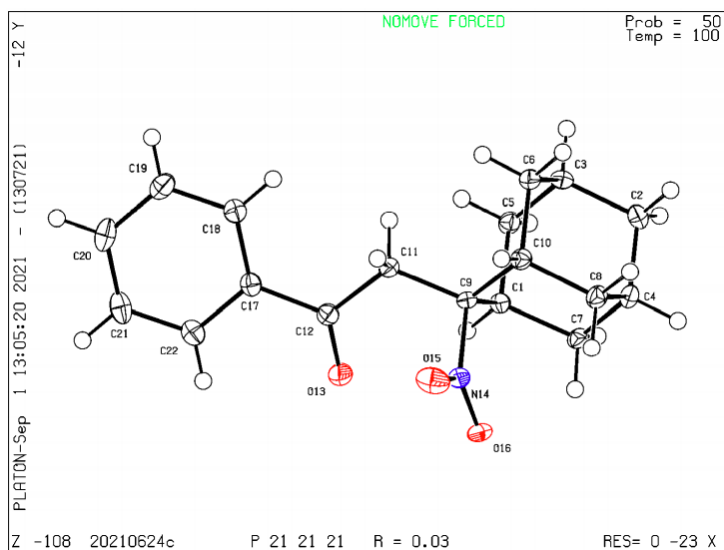

### Crystal data and structure refinement for 3ag.

|                                             |                                                               |
|---------------------------------------------|---------------------------------------------------------------|
| Temperature/K                               | 100.00(10)                                                    |
| Crystal system                              | orthorhombic                                                  |
| Space group                                 | P2 <sub>1</sub> 2 <sub>1</sub> 2 <sub>1</sub>                 |
| a/Å                                         | 6.58510(10)                                                   |
| b/Å                                         | 10.44770(10)                                                  |
| c/Å                                         | 21.3750(2)                                                    |
| α/°                                         | 90                                                            |
| β/°                                         | 90                                                            |
| γ/°                                         | 90                                                            |
| Volume/Å <sup>3</sup>                       | 1470.58(3)                                                    |
| Z                                           | 4                                                             |
| ρ <sub>calc</sub> /cm <sup>3</sup>          | 1.352                                                         |
| μ/mm <sup>-1</sup>                          | 0.739                                                         |
| F(000)                                      | 640.0                                                         |
| Crystal size/mm <sup>3</sup>                | 0.5 × 0.4 × 0.3                                               |
| Radiation                                   | CuKα (λ = 1.54184)                                            |
| 2θ range for data collection/°              | 8.274 to 152.68                                               |
| Index ranges                                | -5 ≤ h ≤ 8, -13 ≤ k ≤ 13, -26 ≤ l ≤ 26                        |
| Reflections collected                       | 13735                                                         |
| Independent reflections                     | 2971 [R <sub>int</sub> = 0.0282, R <sub>sigma</sub> = 0.0169] |
| Data/restraints/parameters                  | 2971/0/200                                                    |
| Goodness-of-fit on F <sup>2</sup>           | 1.038                                                         |
| Final R indexes [I ≥ 2σ (I)]                | R <sub>1</sub> = 0.0275, wR <sub>2</sub> = 0.0739             |
| Final R indexes [all data]                  | R <sub>1</sub> = 0.0278, wR <sub>2</sub> = 0.0741             |
| Largest diff. peak/hole / e Å <sup>-3</sup> | 0.24/-0.17                                                    |
| Flack parameter                             | -0.01(6)                                                      |



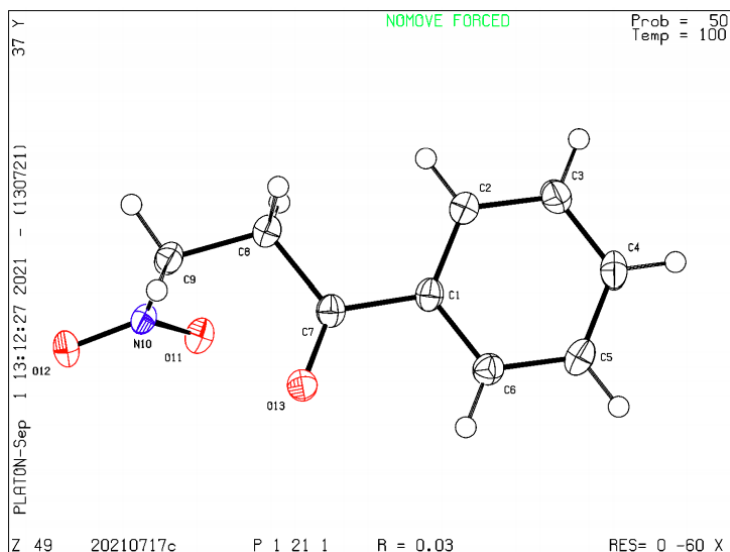

### Crystal data and structure refinement for 3ao.

|                                             |                                                               |
|---------------------------------------------|---------------------------------------------------------------|
| Temperature/K                               | 99.99(10)                                                     |
| Crystal system                              | monoclinic                                                    |
| Space group                                 | P2 <sub>1</sub>                                               |
| a/Å                                         | 5.61652(15)                                                   |
| b/Å                                         | 8.2450(3)                                                     |
| c/Å                                         | 9.0227(3)                                                     |
| α/°                                         | 90                                                            |
| β/°                                         | 92.654(2)                                                     |
| γ/°                                         | 90                                                            |
| Volume/Å <sup>3</sup>                       | 417.38(2)                                                     |
| Z                                           | 2                                                             |
| ρ <sub>calc</sub> /cm <sup>3</sup>          | 1.426                                                         |
| μ/mm <sup>-1</sup>                          | 0.910                                                         |
| F(000)                                      | 188.0                                                         |
| Crystal size/mm <sup>3</sup>                | 0.7 × 0.4 × 0.1                                               |
| Radiation                                   | CuKα (λ = 1.54184)                                            |
| 2θ range for data collection/°              | 9.814 to 151.768                                              |
| Index ranges                                | -6 ≤ h ≤ 6, -10 ≤ k ≤ 10, -11 ≤ l ≤ 11                        |
| Reflections collected                       | 7648                                                          |
| Independent reflections                     | 1631 [R <sub>int</sub> = 0.0439, R <sub>sigma</sub> = 0.0222] |
| Data/restraints/parameters                  | 1631/1/119                                                    |
| Goodness-of-fit on F <sup>2</sup>           | 1.095                                                         |
| Final R indexes [I ≥ 2σ (I)]                | R <sub>1</sub> = 0.0315, wR <sub>2</sub> = 0.0904             |
| Final R indexes [all data]                  | R <sub>1</sub> = 0.0317, wR <sub>2</sub> = 0.0906             |
| Largest diff. peak/hole / e Å <sup>-3</sup> | 0.24/-0.17                                                    |
| Flack parameter                             | -0.14(16)                                                     |

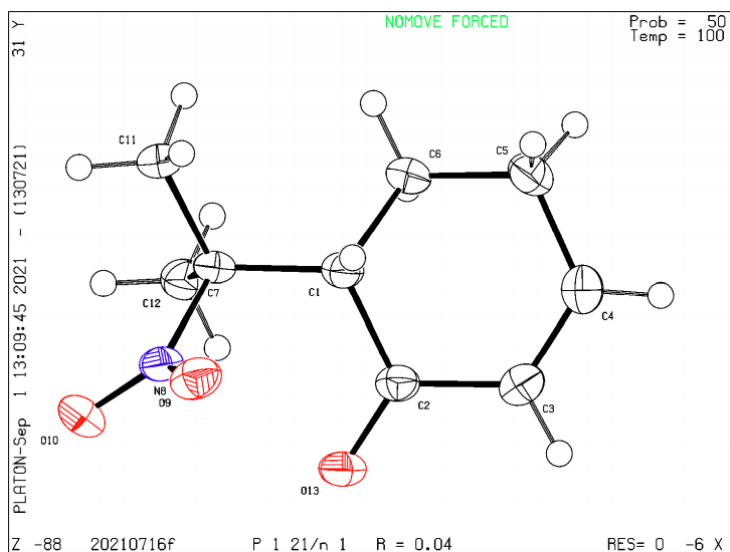

### Crystal data and structure refinement for 3p'a.

|                                               |                                                               |
|-----------------------------------------------|---------------------------------------------------------------|
| Temperature/K                                 | 100.00(10)                                                    |
| Crystal system                                | monoclinic                                                    |
| Space group                                   | $P2_1/n$                                                      |
| $a/\text{\AA}$                                | 5.94438(17)                                                   |
| $b/\text{\AA}$                                | 15.3656(5)                                                    |
| $c/\text{\AA}$                                | 9.9491(4)                                                     |
| $\alpha/^\circ$                               | 90                                                            |
| $\beta/^\circ$                                | 96.274(3)                                                     |
| $\gamma/^\circ$                               | 90                                                            |
| Volume/ $\text{\AA}^3$                        | 903.30(5)                                                     |
| Z                                             | 4                                                             |
| $\rho_{\text{calc}}/\text{cm}^3$              | 1.347                                                         |
| $\mu/\text{mm}^{-1}$                          | 0.843                                                         |
| F(000)                                        | 392.0                                                         |
| Crystal size/ $\text{mm}^3$                   | $0.4 \times 0.3 \times 0.05$                                  |
| Radiation                                     | $\text{CuK}\alpha$ ( $\lambda = 1.54184$ )                    |
| $2\theta$ range for data collection/ $^\circ$ | 10.638 to 151.98                                              |
| Index ranges                                  | $-6 \leq h \leq 7, -19 \leq k \leq 19, -12 \leq l \leq 12$    |
| Reflections collected                         | 16839                                                         |
| Independent reflections                       | 1860 [ $R_{\text{int}} = 0.0591, R_{\text{sigma}} = 0.0262$ ] |
| Data/restraints/parameters                    | 1860/0/121                                                    |
| Goodness-of-fit on $F^2$                      | 1.083                                                         |
| Final R indexes [ $I \geq 2\sigma(I)$ ]       | $R_1 = 0.0428, wR_2 = 0.1200$                                 |
| Final R indexes [all data]                    | $R_1 = 0.0459, wR_2 = 0.1233$                                 |
| Largest diff. peak/hole / $e \text{\AA}^{-3}$ | 0.32/-0.20                                                    |

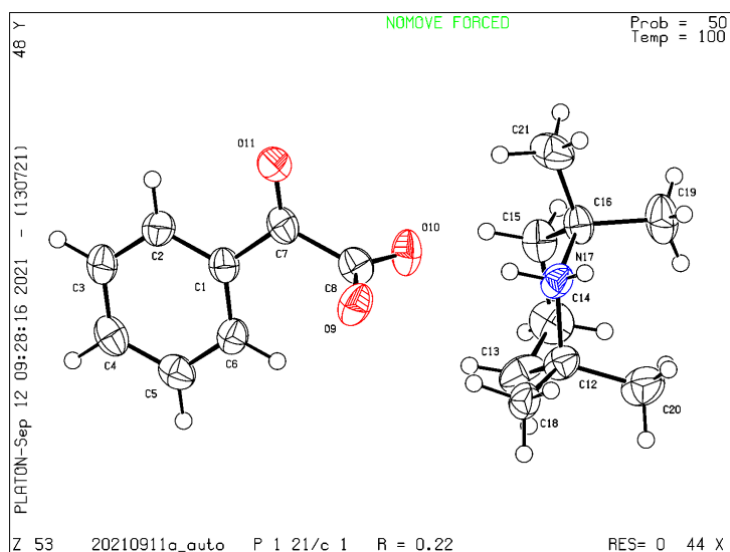


---

### Crystal data and structure refinement for 2,2,6,6-tetramethylpiperidine benzoylformate.

---

|                                             |                                                               |
|---------------------------------------------|---------------------------------------------------------------|
| Temperature/K                               | 99.99(10)                                                     |
| Crystal system                              | monoclinic                                                    |
| Space group                                 | P2 <sub>1</sub> /c                                            |
| a/Å                                         | 10.3396(5)                                                    |
| b/Å                                         | 10.1521(4)                                                    |
| c/Å                                         | 15.1640(8)                                                    |
| $\alpha$ /°                                 | 90                                                            |
| $\beta$ /°                                  | 90.266(5)                                                     |
| $\gamma$ /°                                 | 90                                                            |
| Volume/Å <sup>3</sup>                       | 1591.73(13)                                                   |
| Z                                           | 4                                                             |
| $\rho_{\text{calc}}/\text{cm}^3$            | 1.222                                                         |
| $\mu/\text{mm}^{-1}$                        | 0.651                                                         |
| F(000)                                      | 635.0                                                         |
| Crystal size/mm <sup>3</sup>                | 0.6 × 0.3 × 0.1                                               |
| Radiation                                   | Cu K $\alpha$ ( $\lambda$ = 1.54184)                          |
| 2 $\theta$ range for data collection/°      | 8.552 to 153.368                                              |
| Index ranges                                | -12 ≤ h ≤ 13, -12 ≤ k ≤ 12, -16 ≤ l ≤ 19                      |
| Reflections collected                       | 14153                                                         |
| Independent reflections                     | 3188 [R <sub>int</sub> = 0.0642, R <sub>sigma</sub> = 0.0369] |
| Data/restraints/parameters                  | 3188/0/195                                                    |
| Goodness-of-fit on F <sup>2</sup>           | 3.359                                                         |
| Final R indexes [I ≥ 2 $\sigma$ (I)]        | R <sub>1</sub> = 0.2227, wR <sub>2</sub> = 0.6254             |
| Final R indexes [all data]                  | R <sub>1</sub> = 0.2269, wR <sub>2</sub> = 0.6288             |
| Largest diff. peak/hole / e Å <sup>-3</sup> | 1.04/-0.75                                                    |

---

# 11. NMR spectra

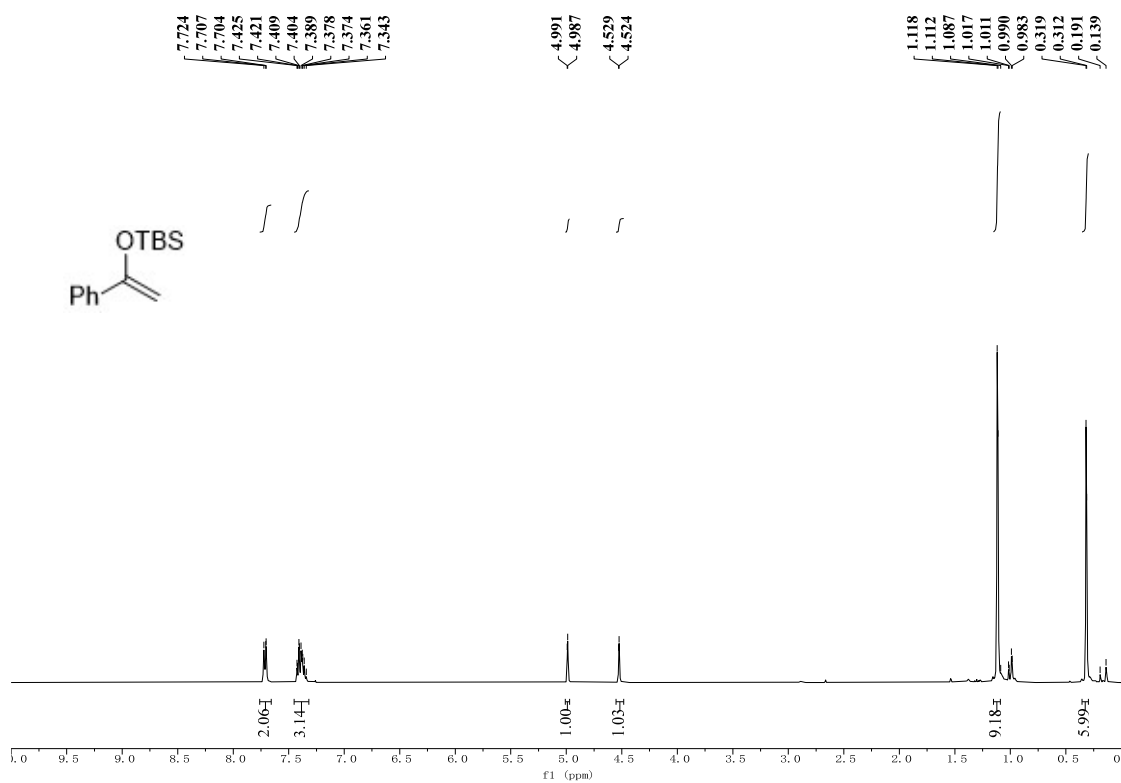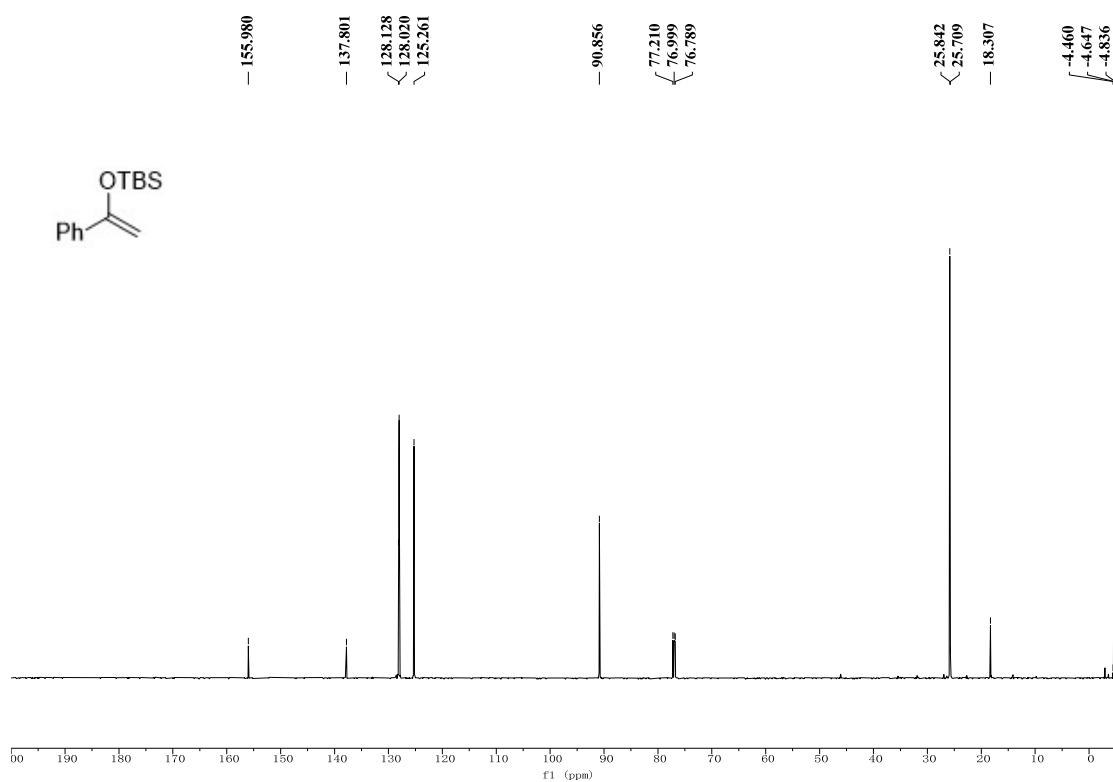

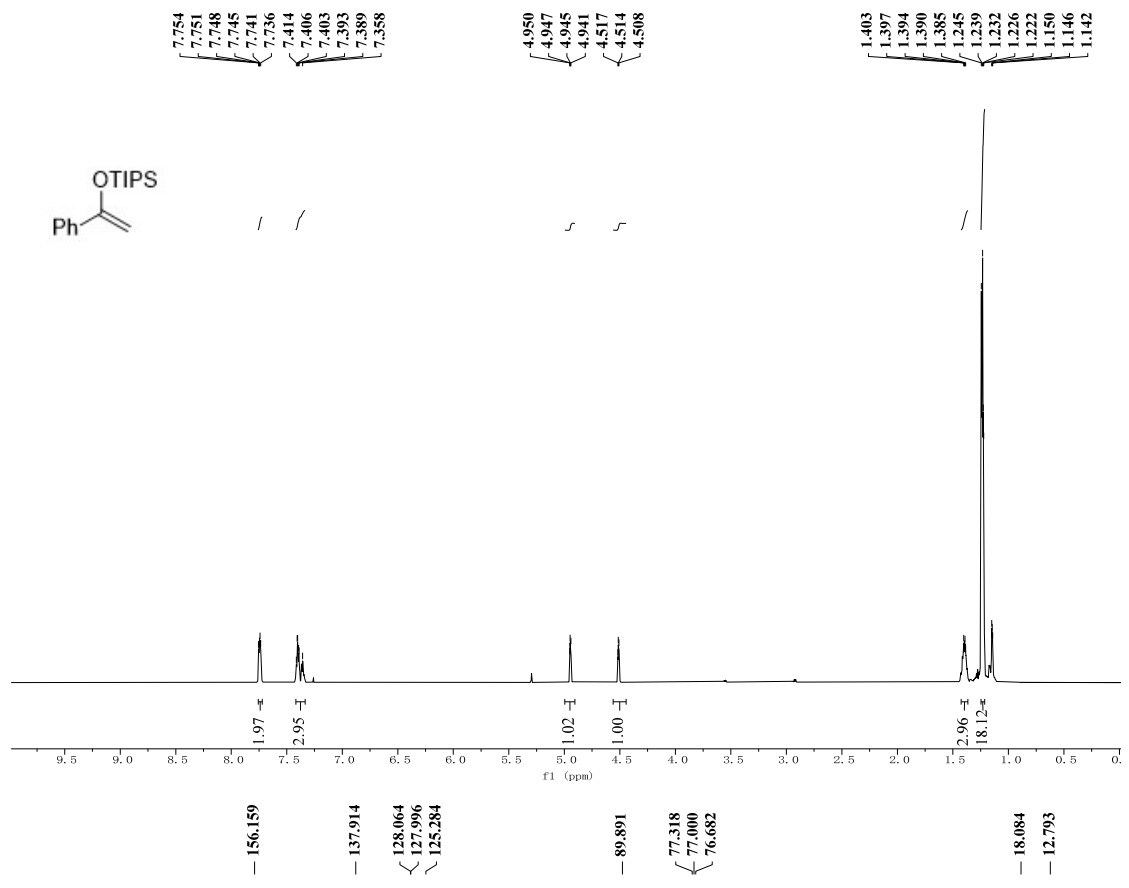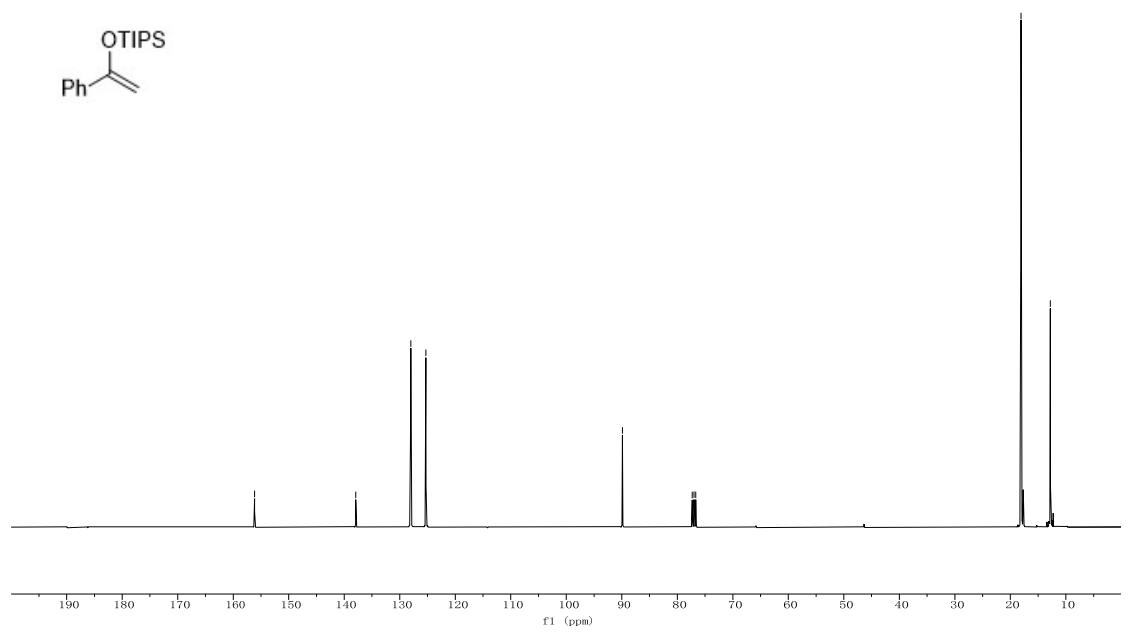

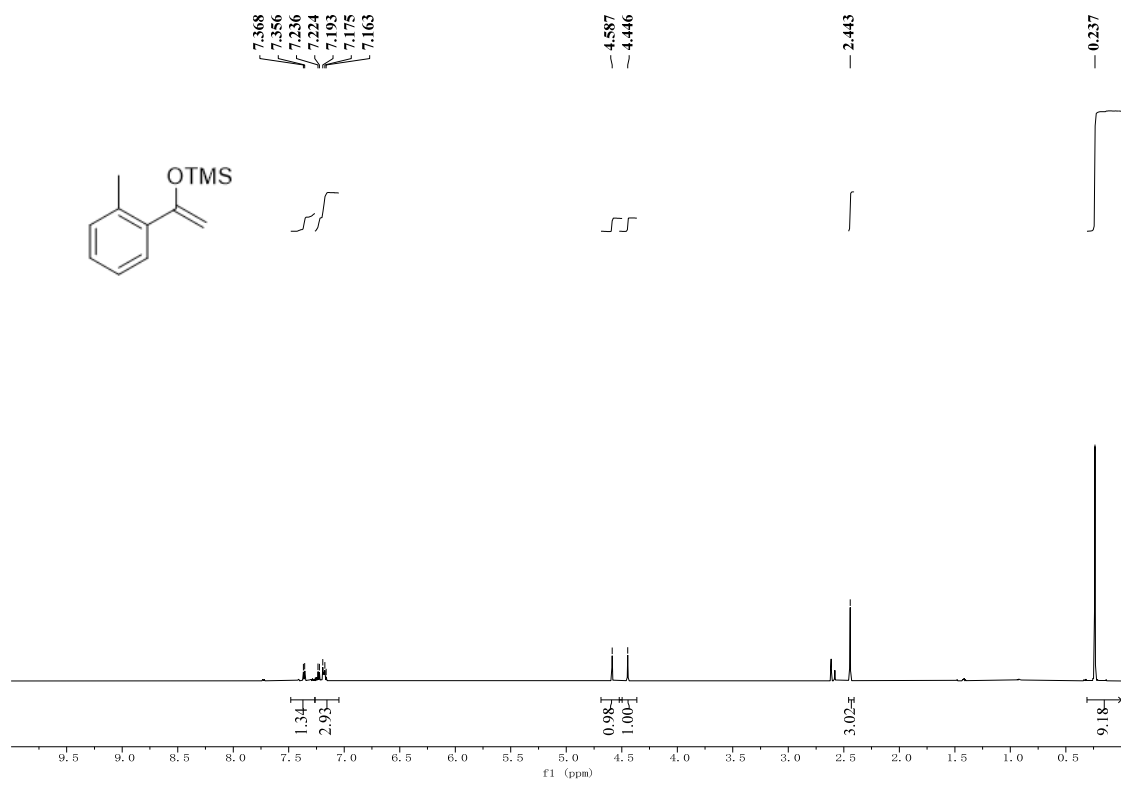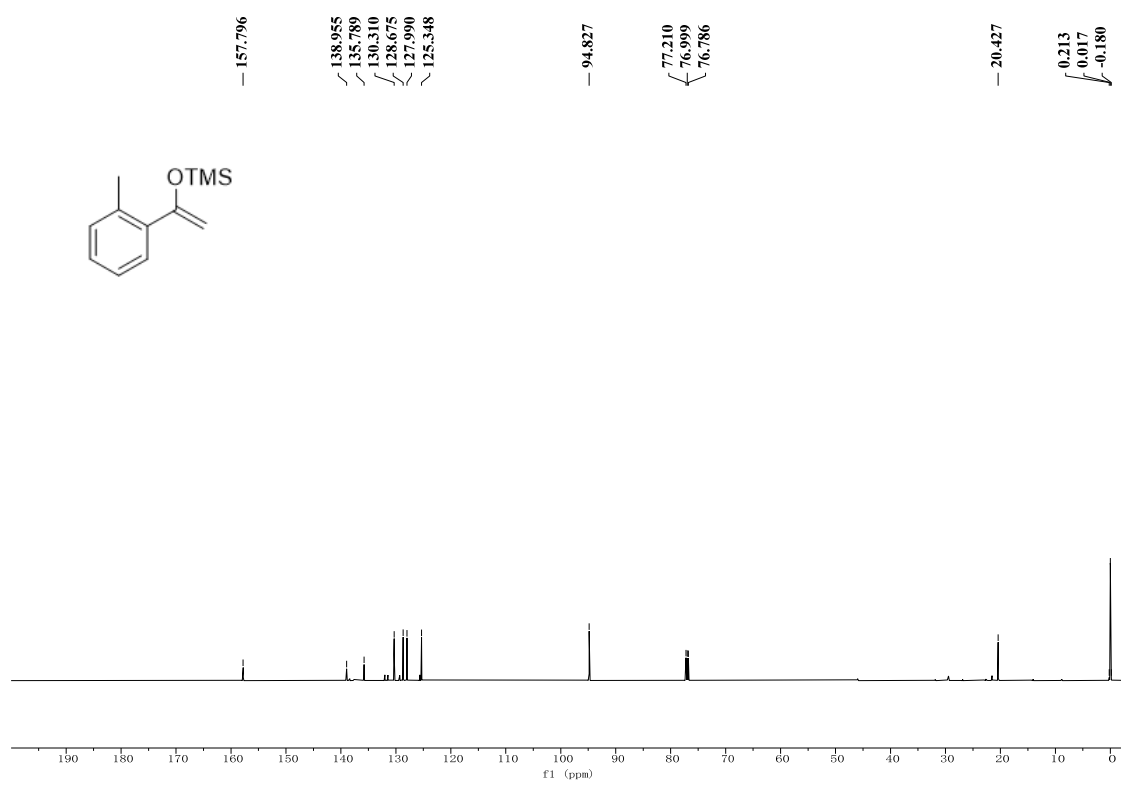

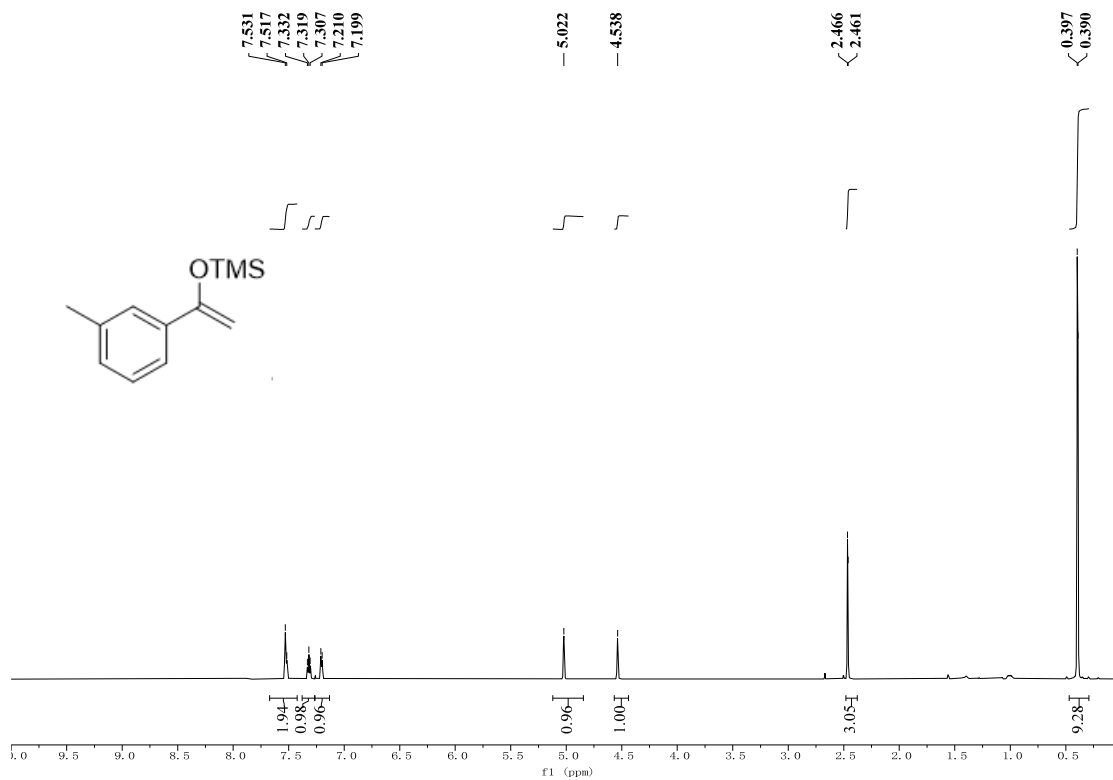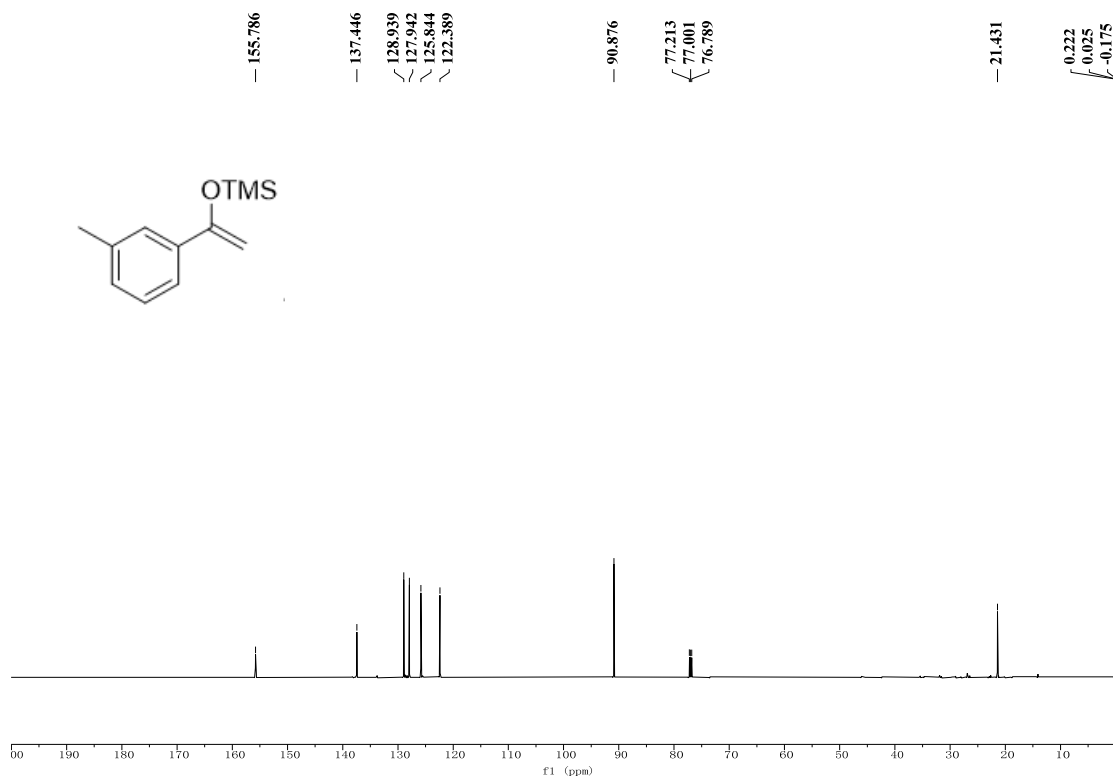

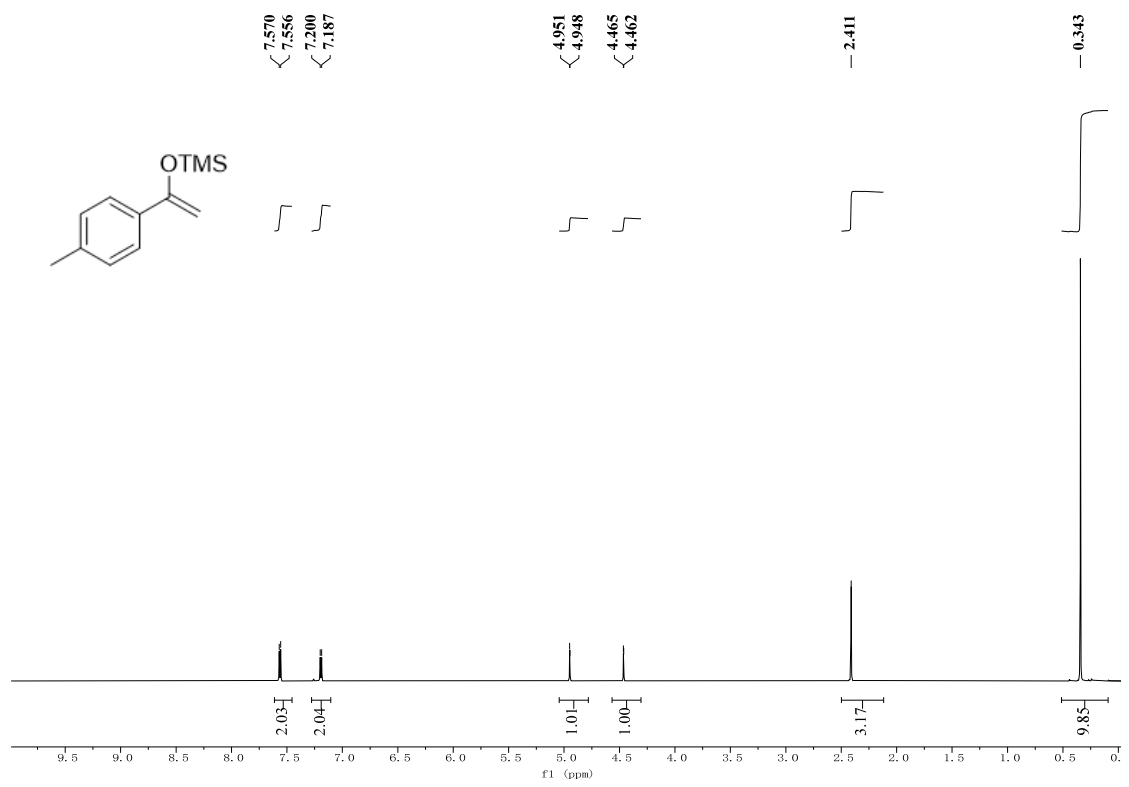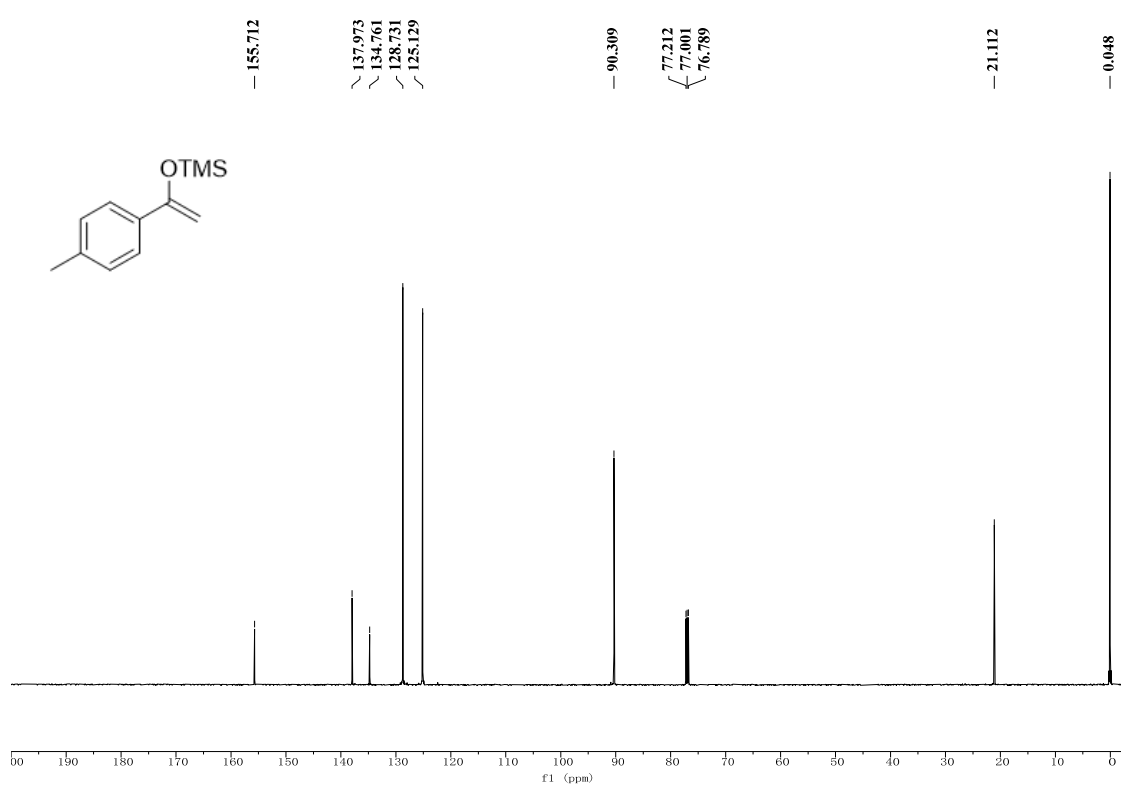



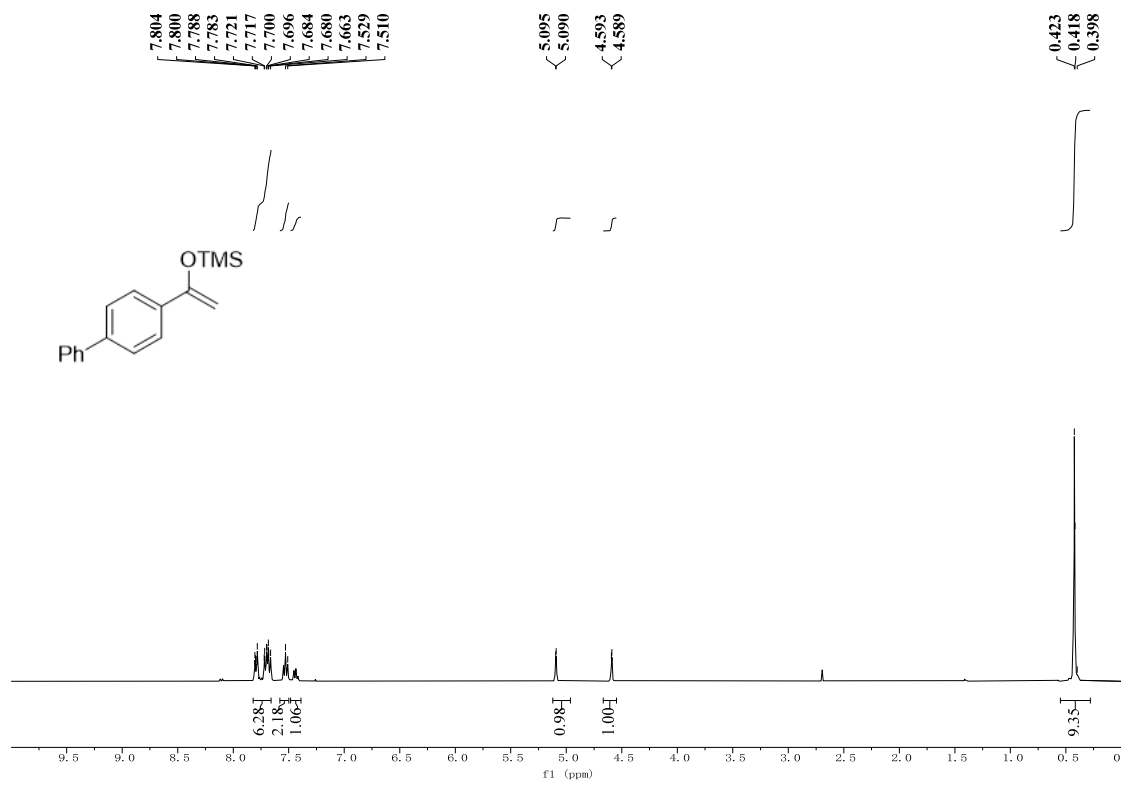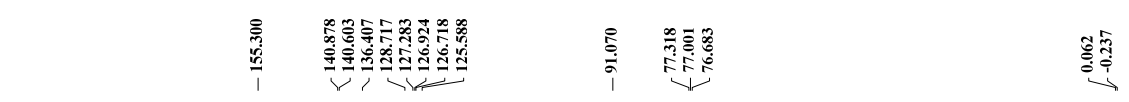

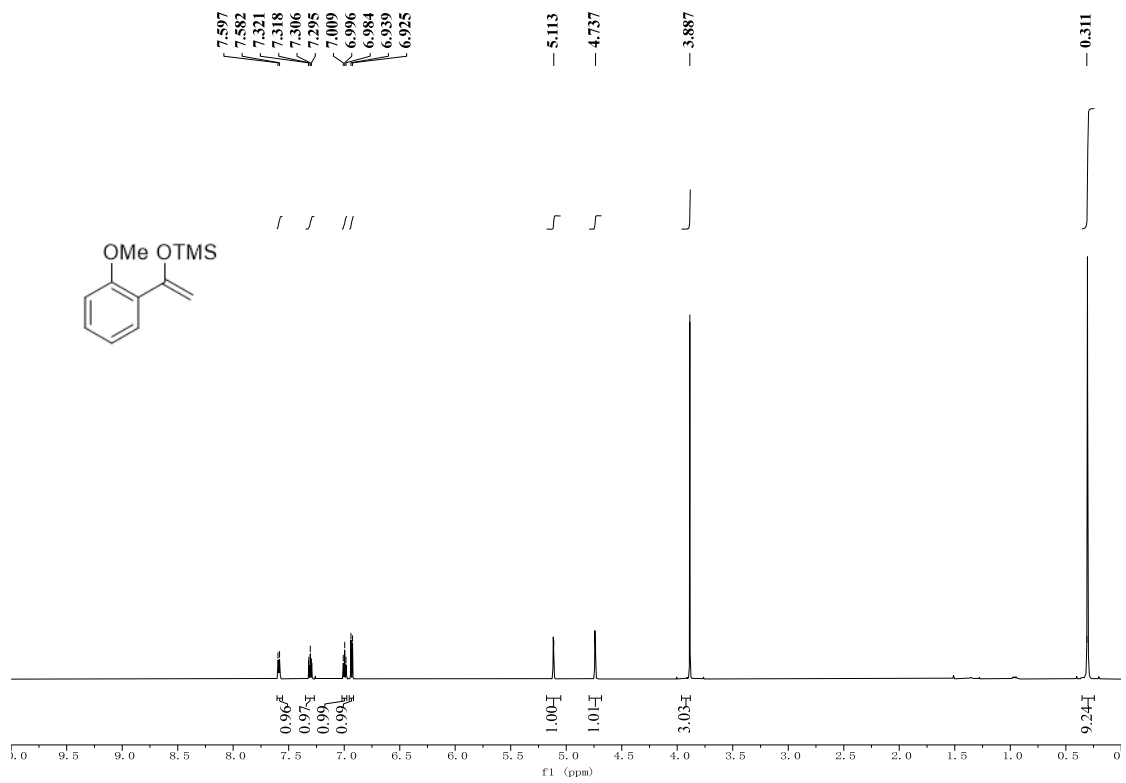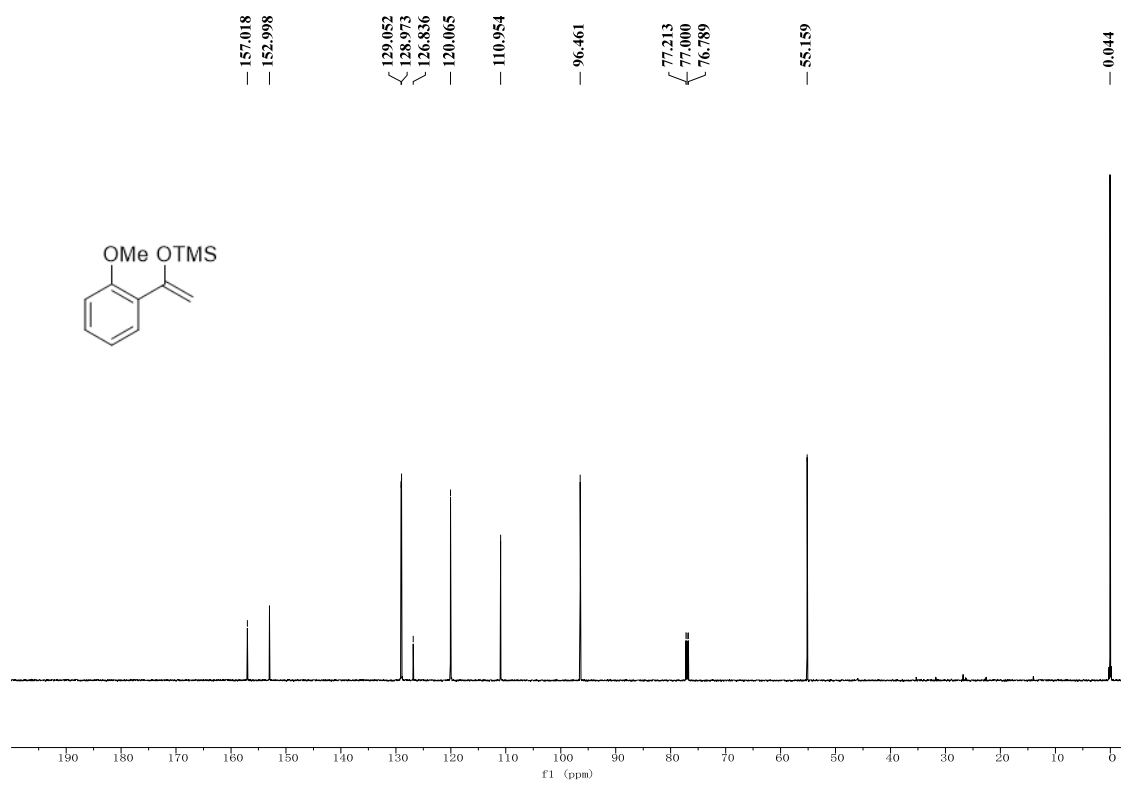

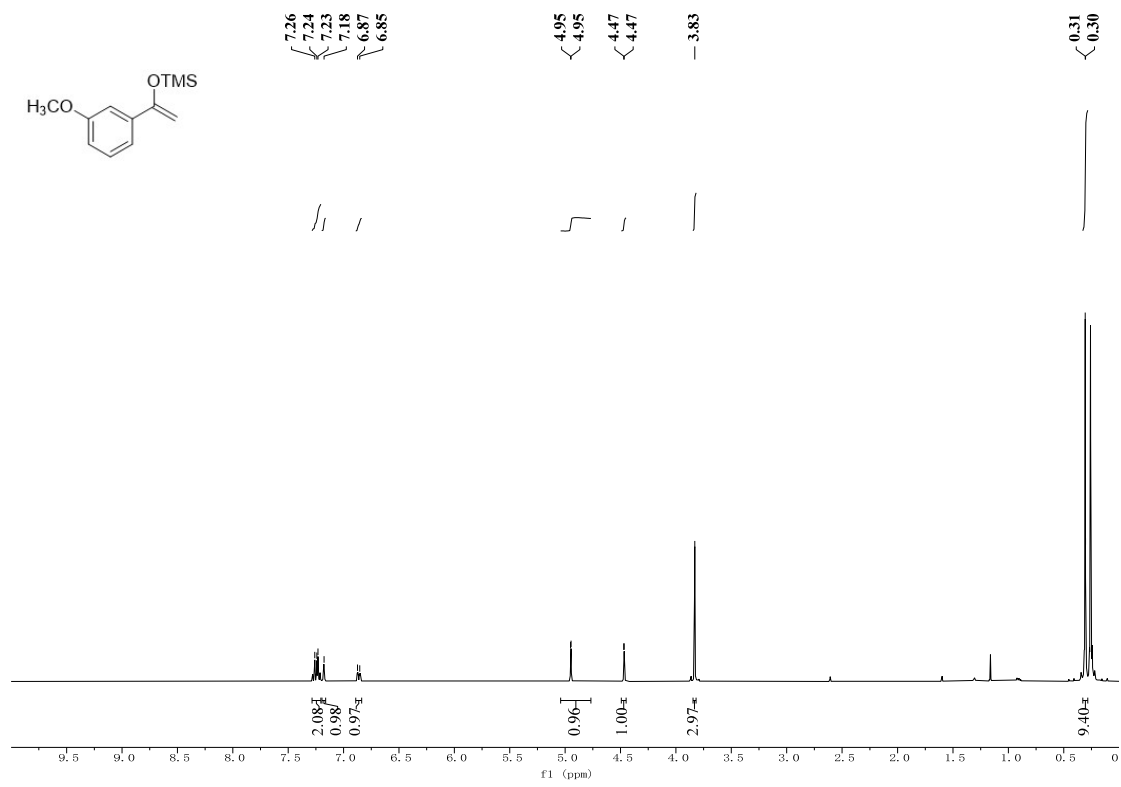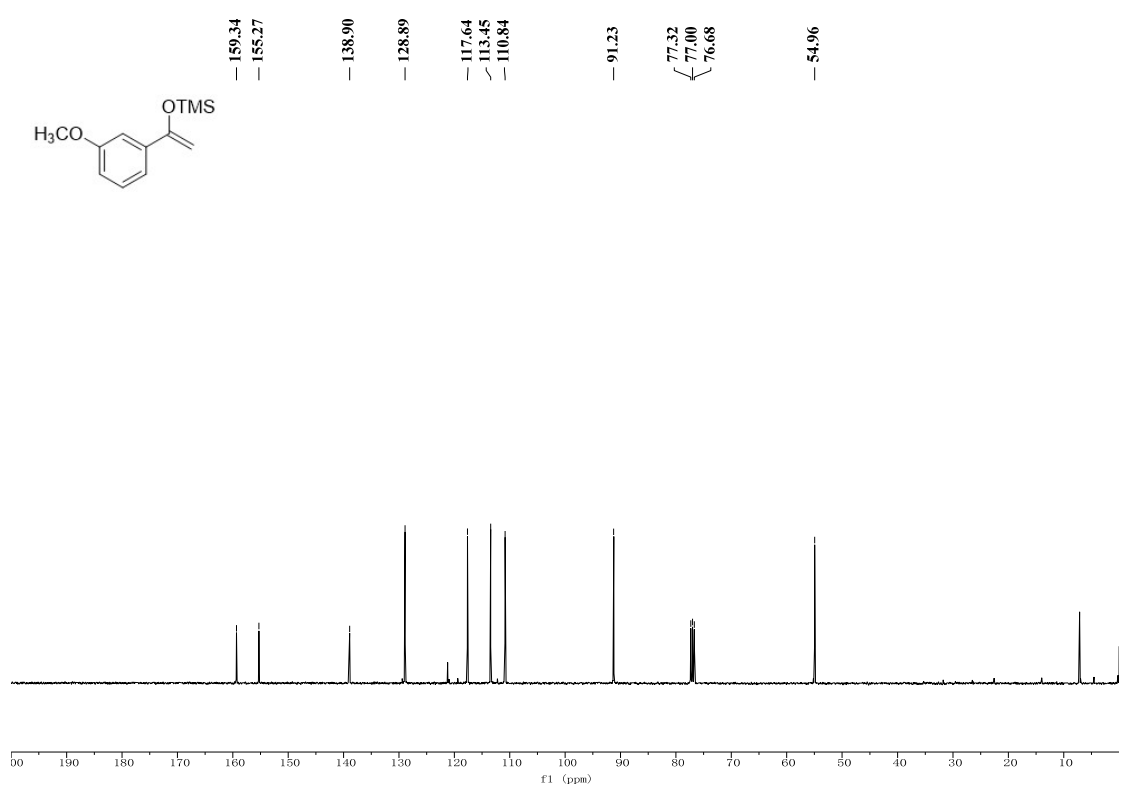

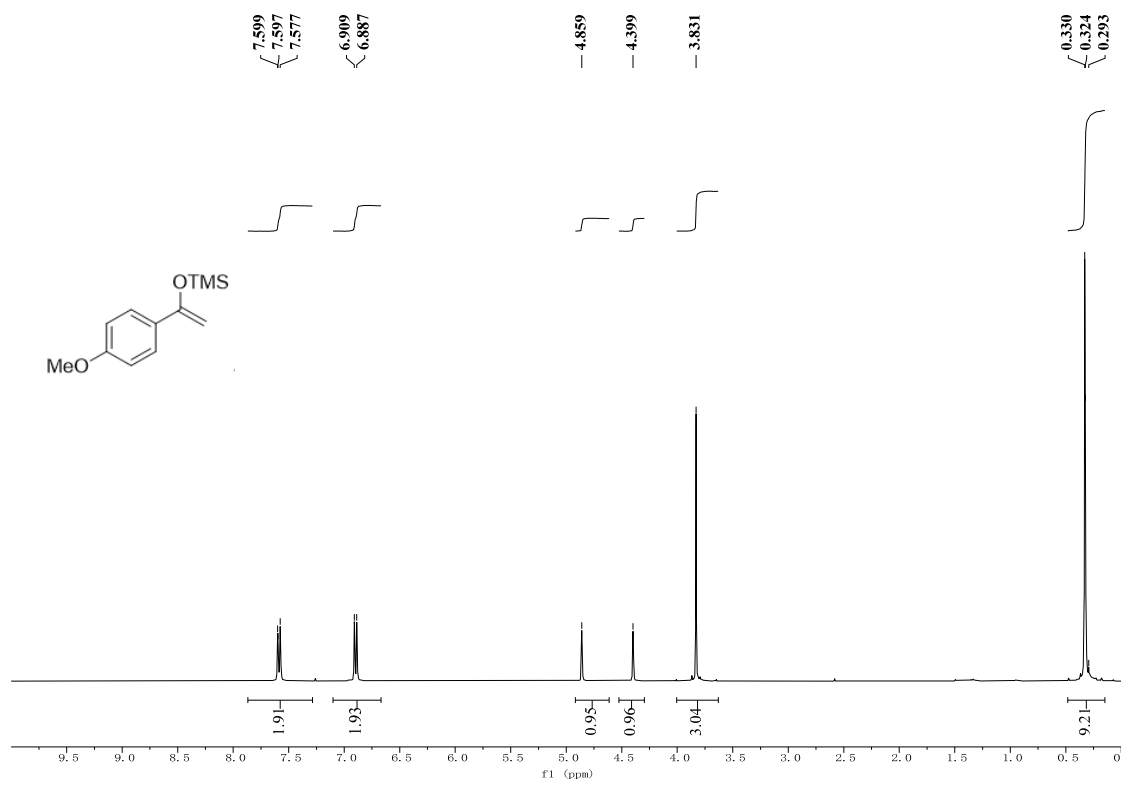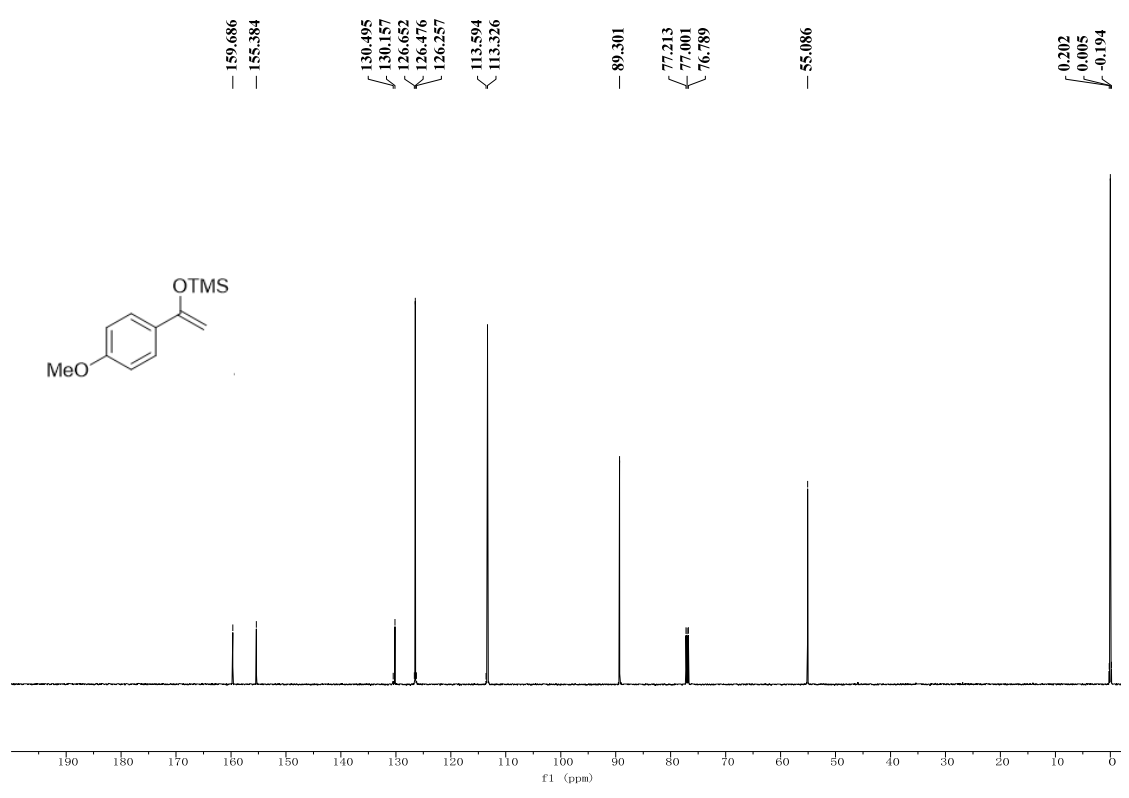

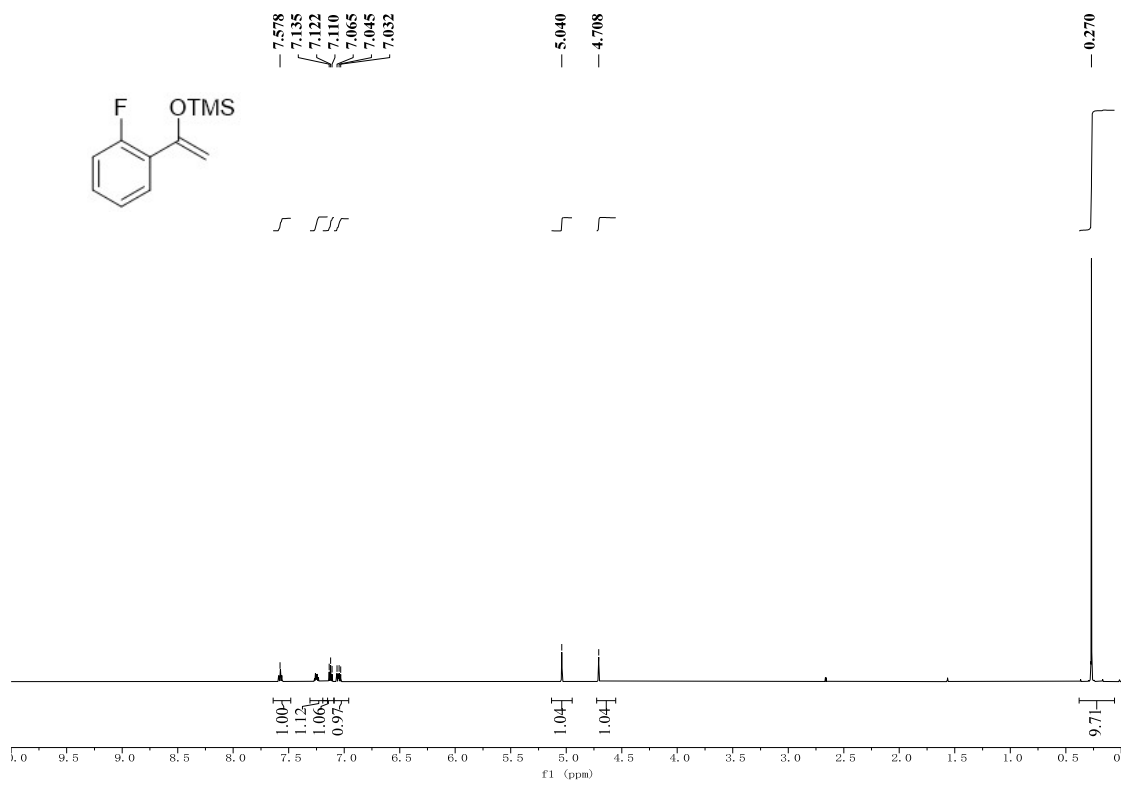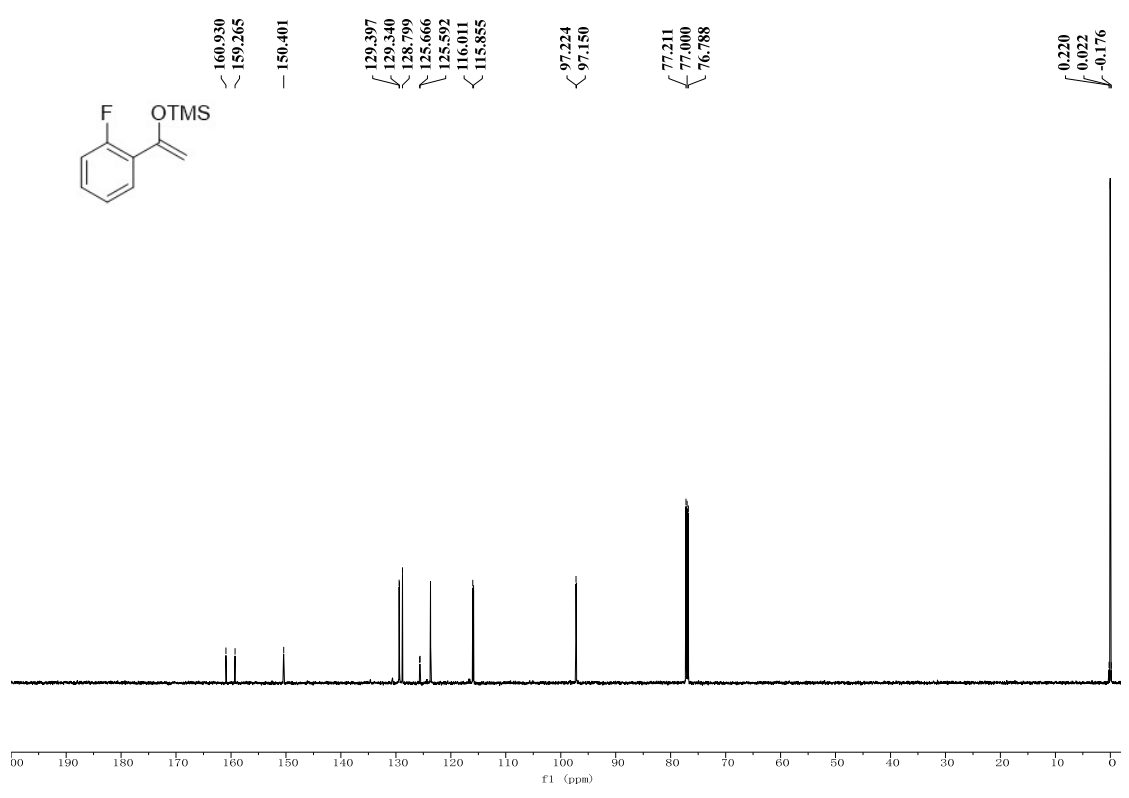

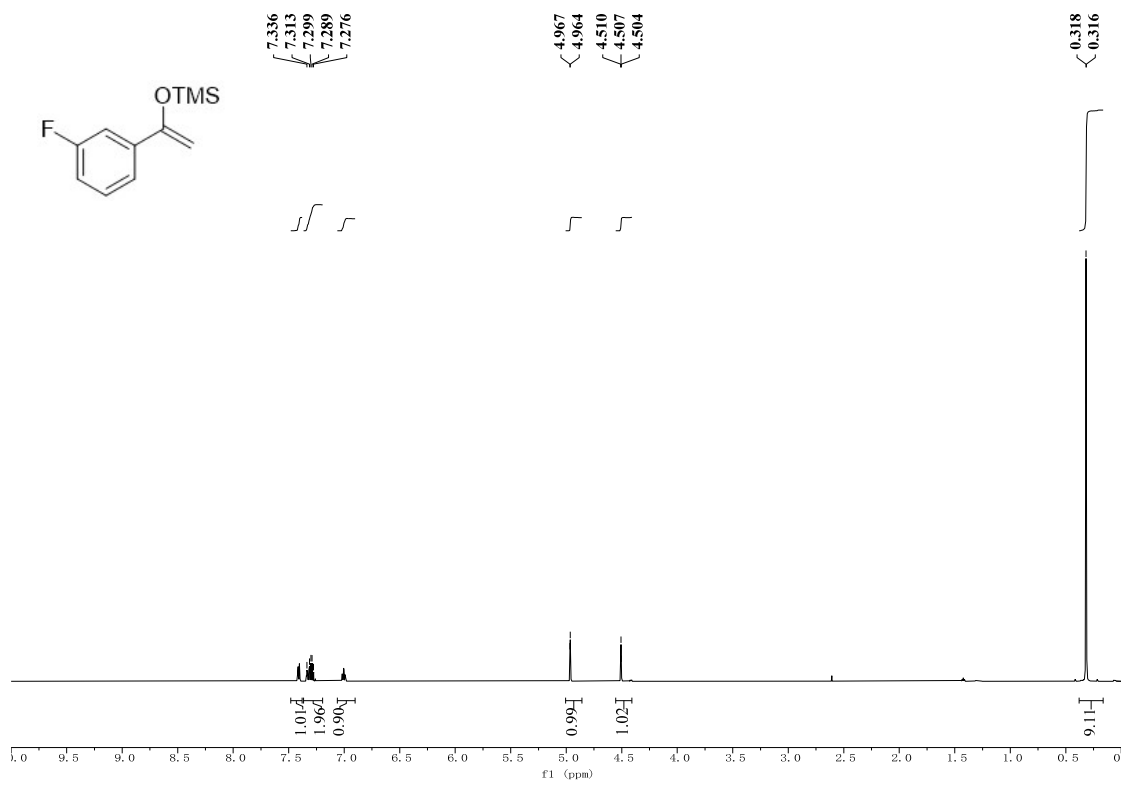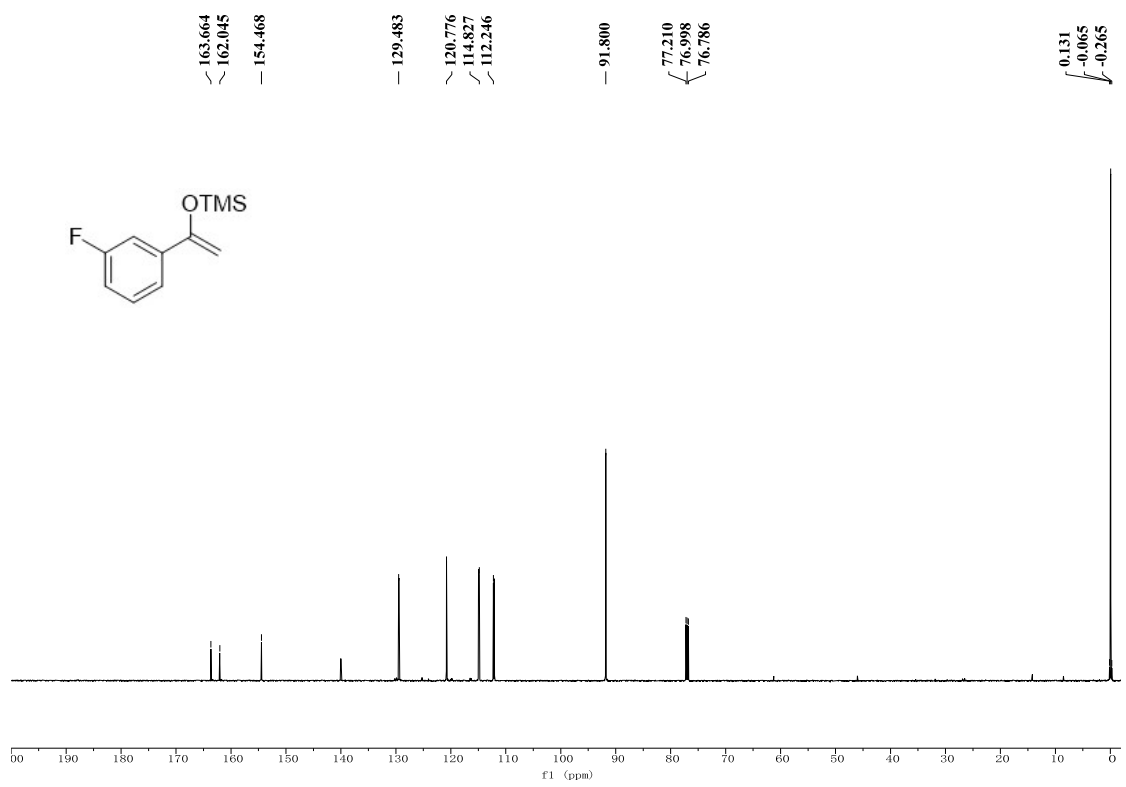

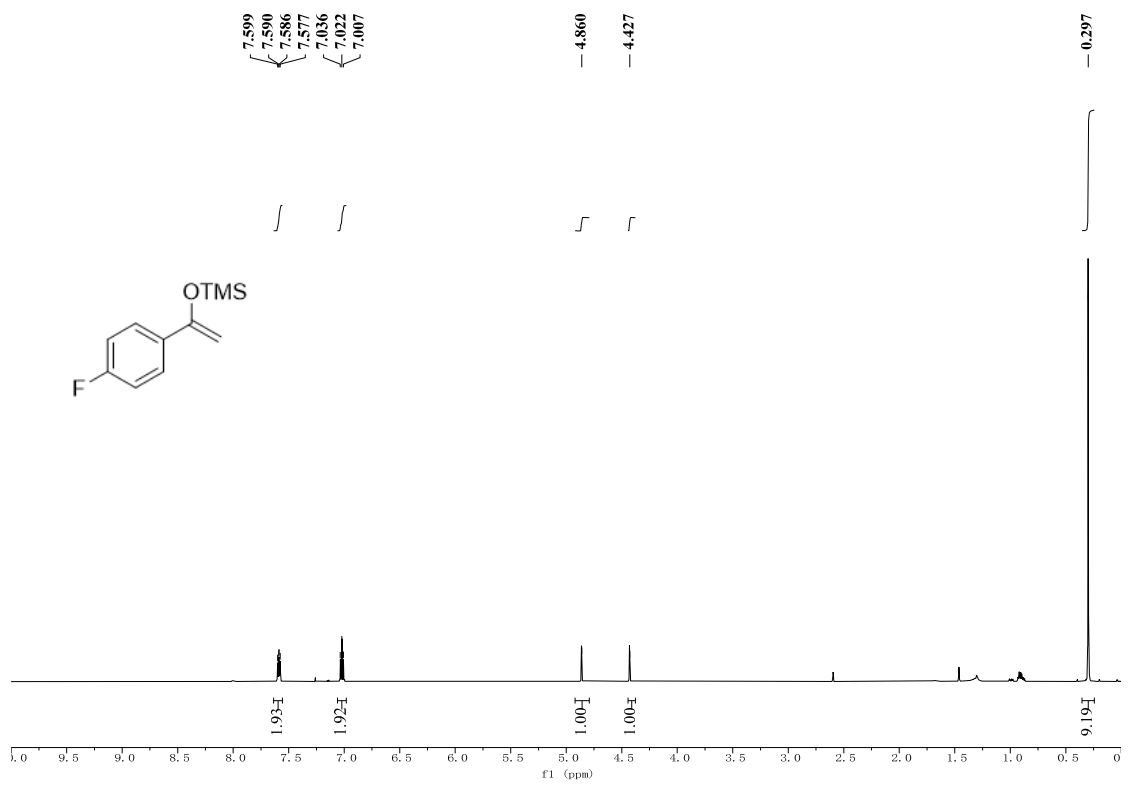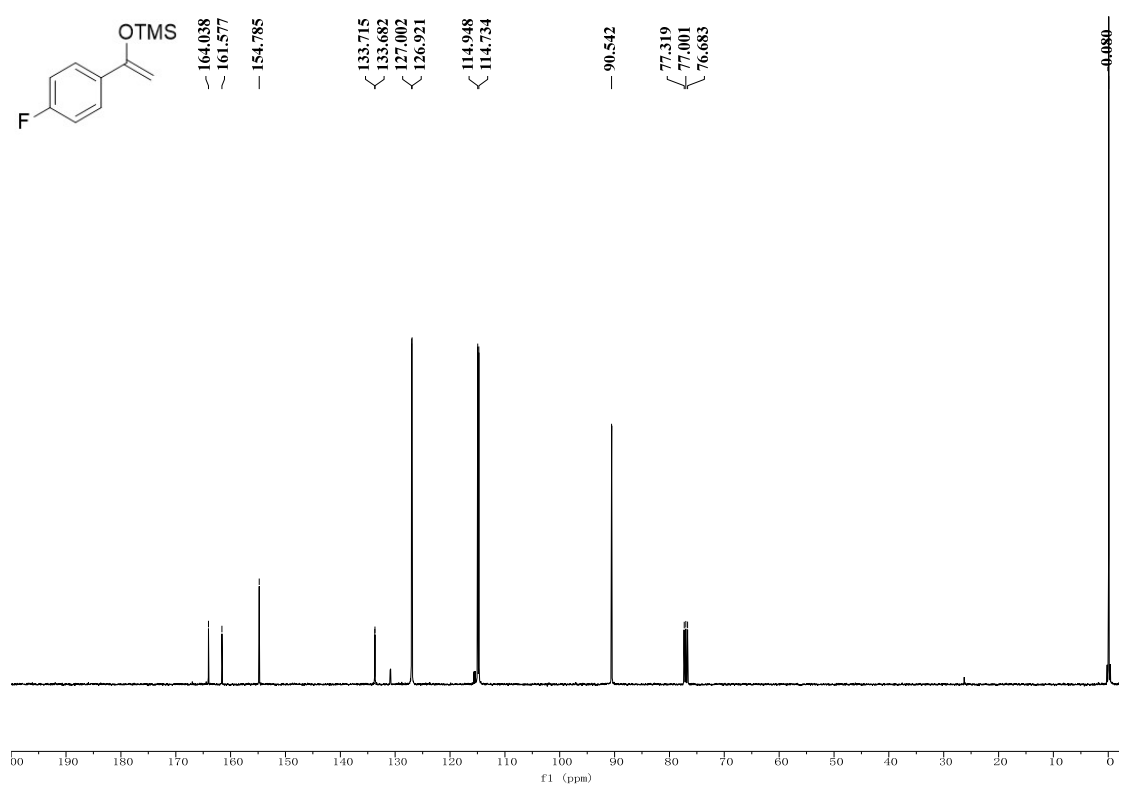

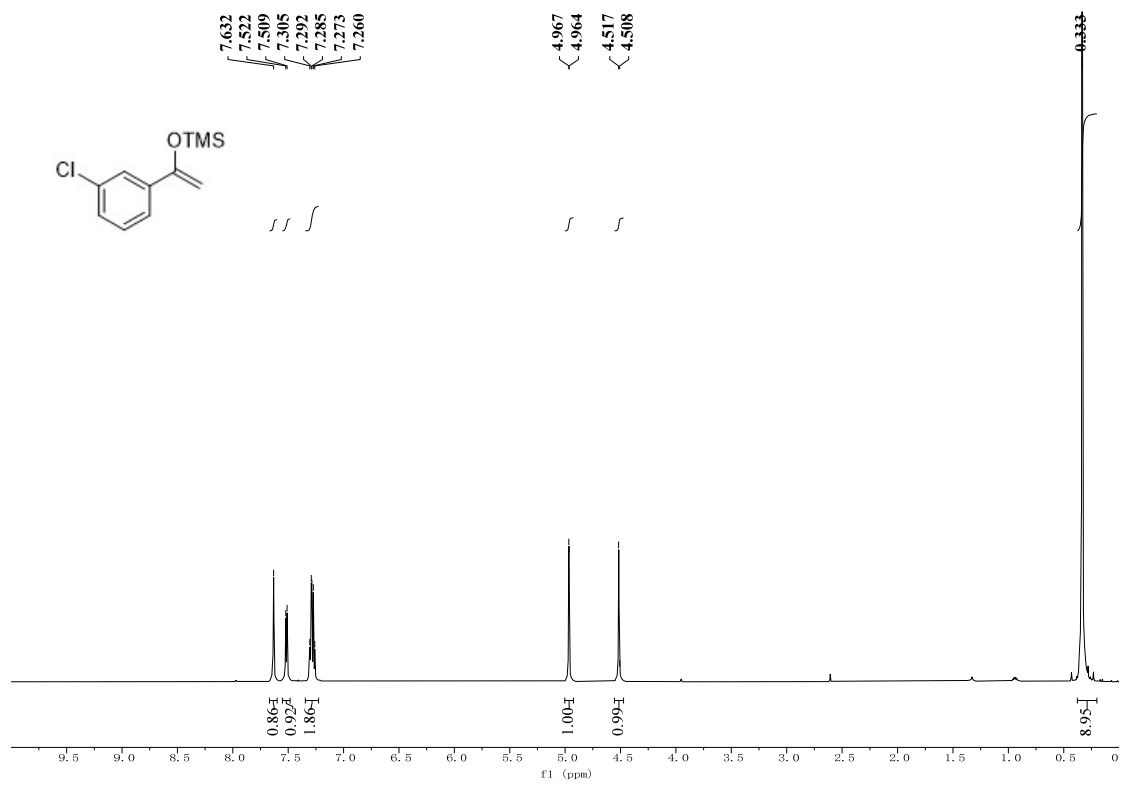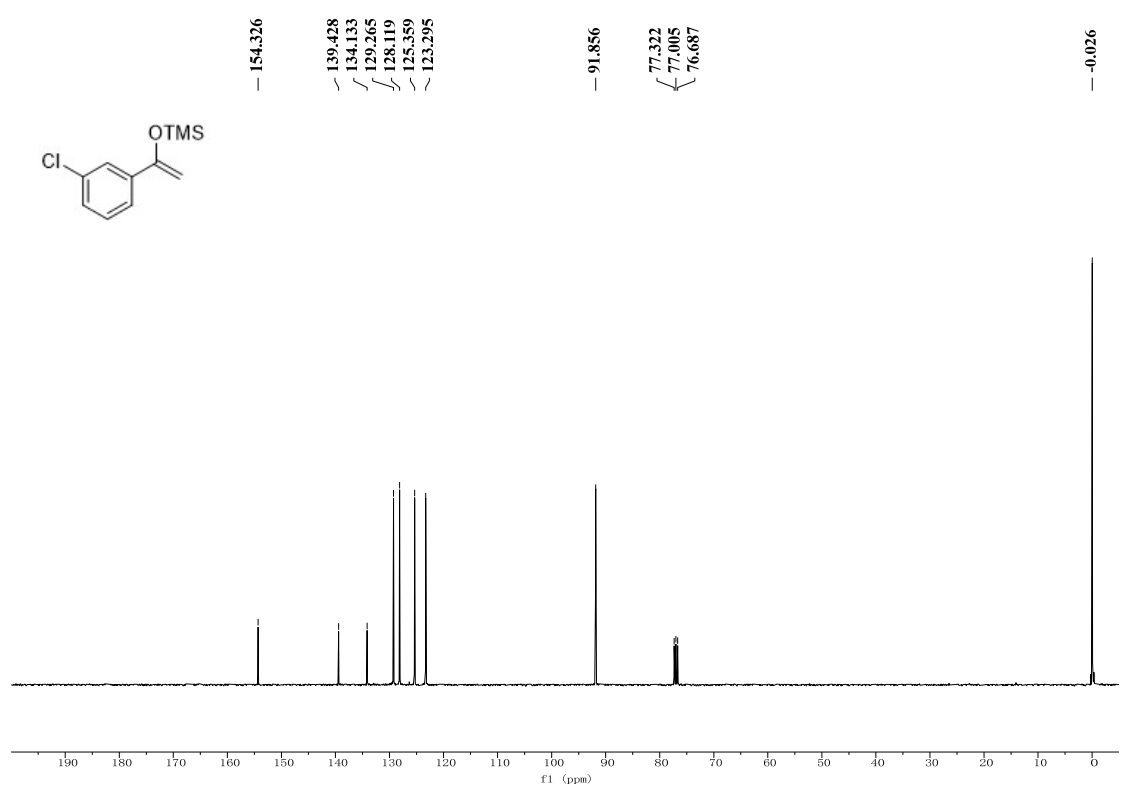



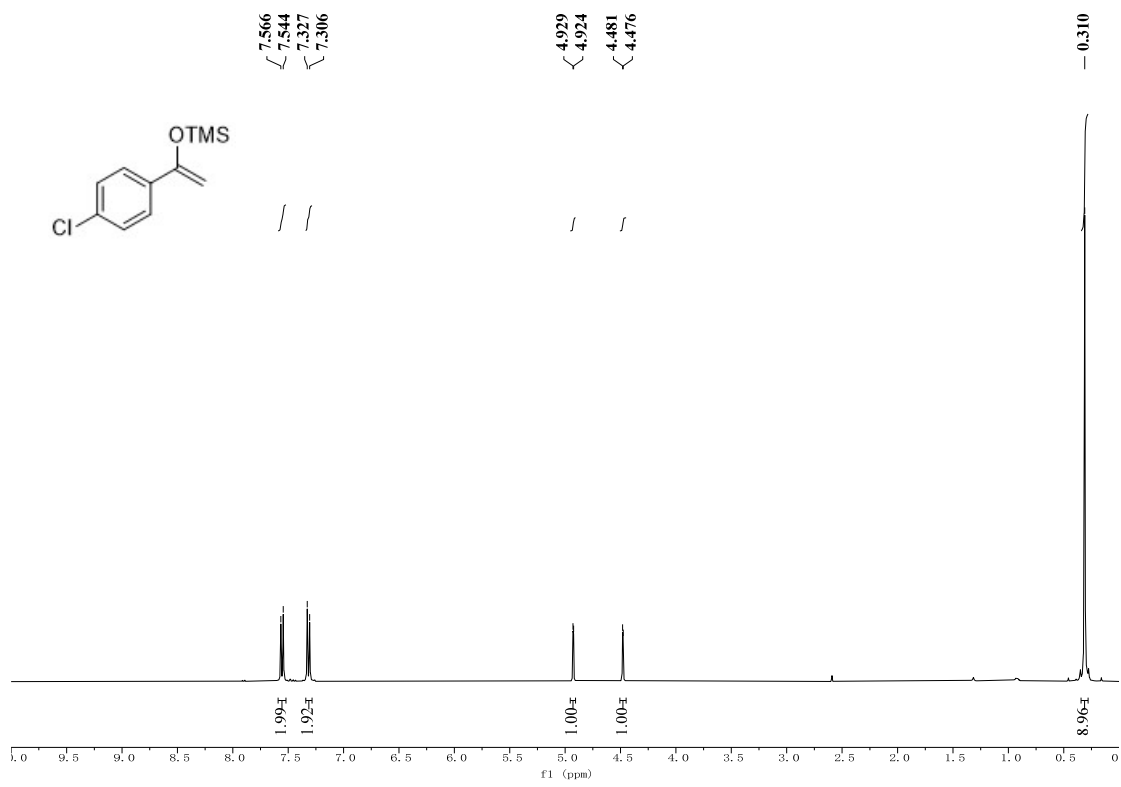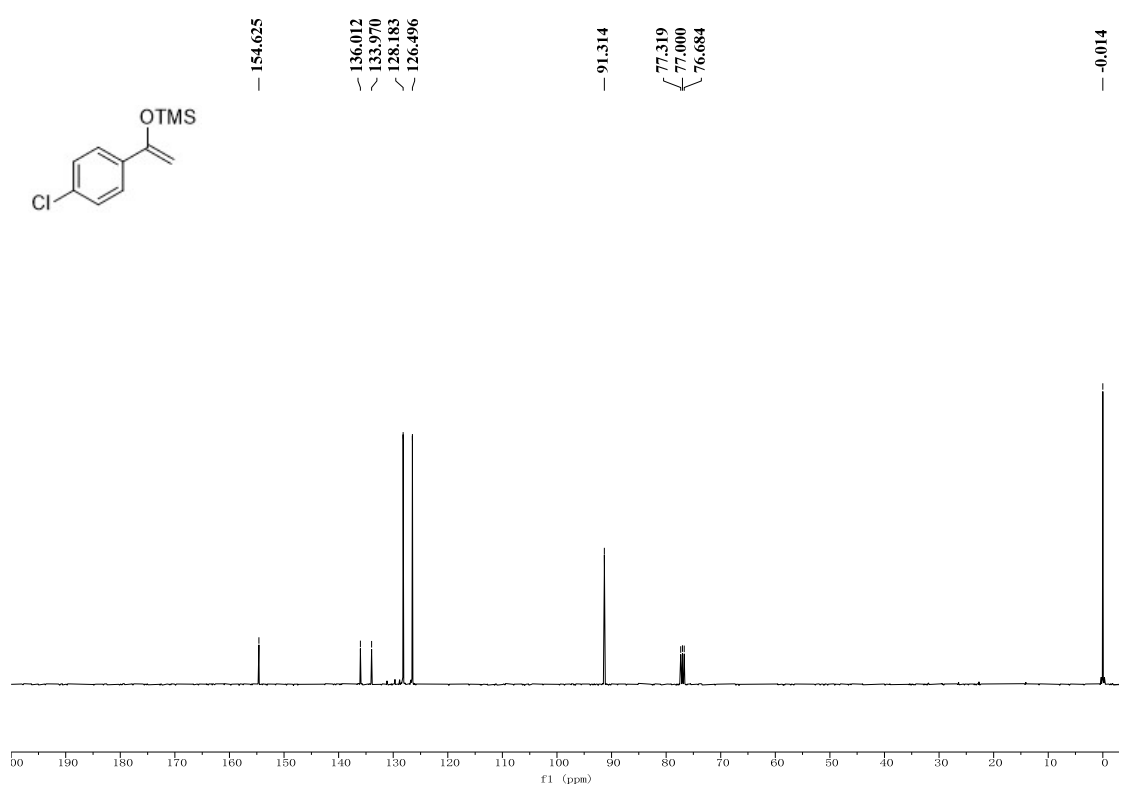

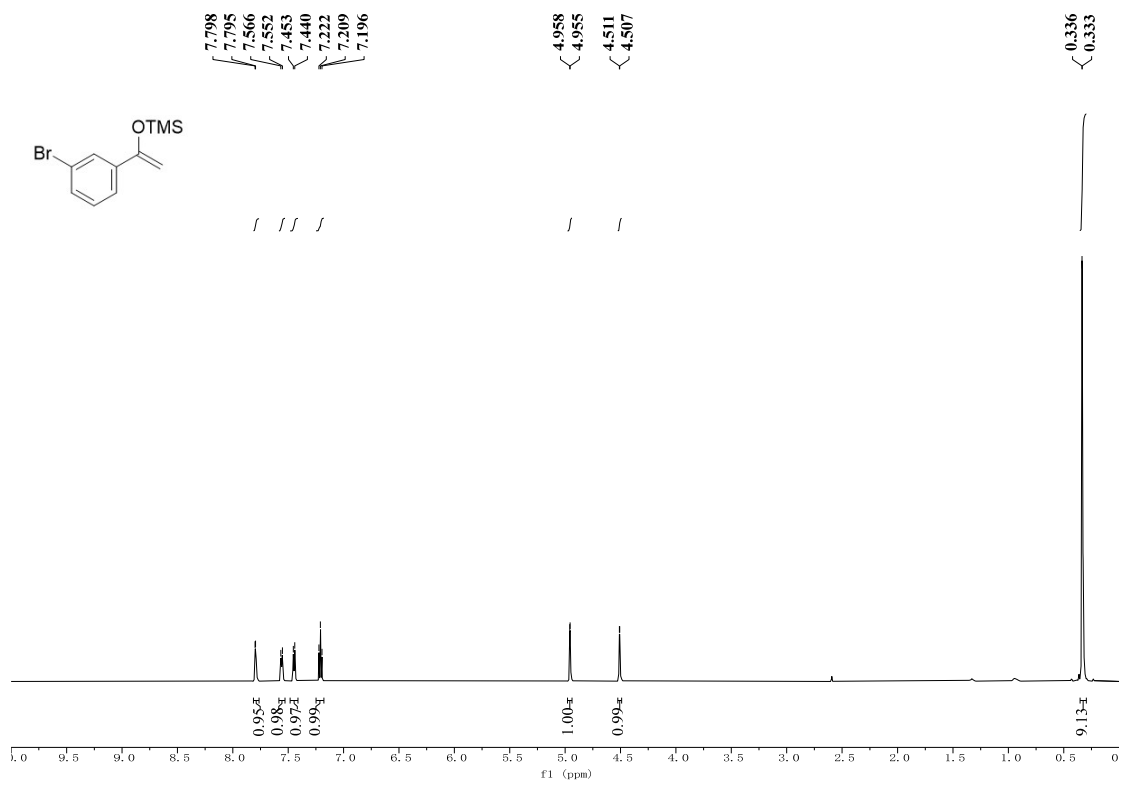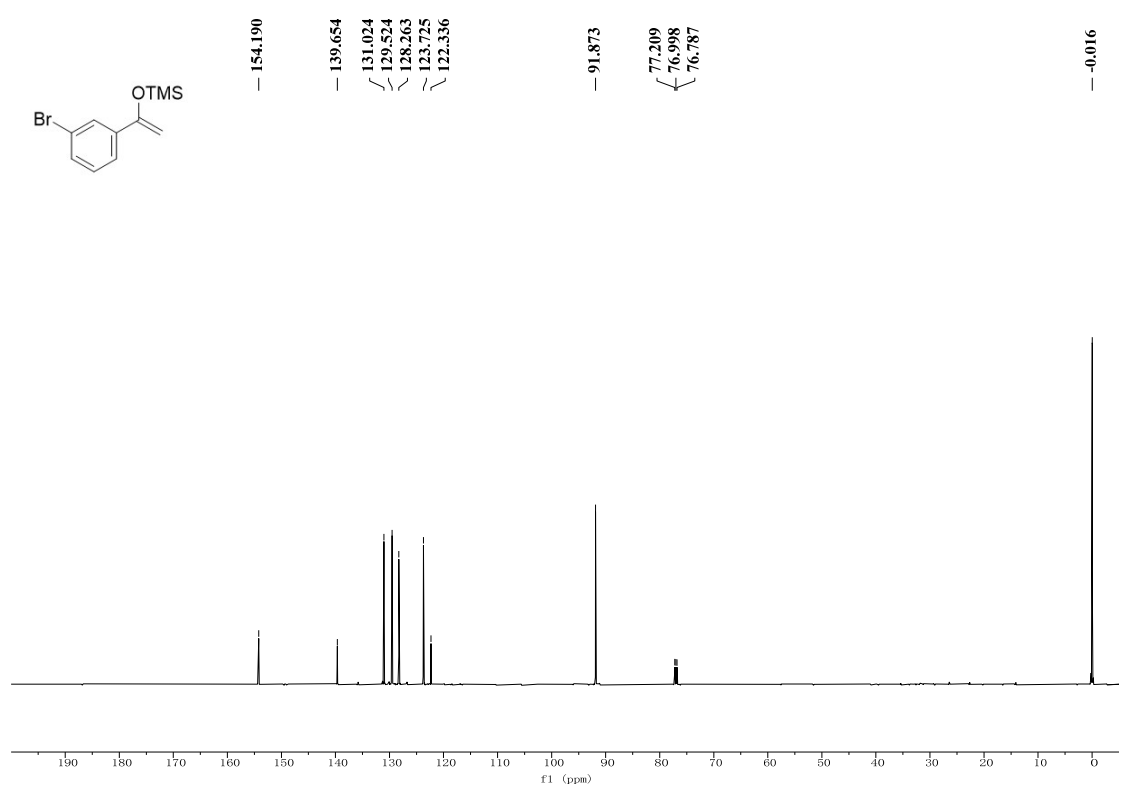

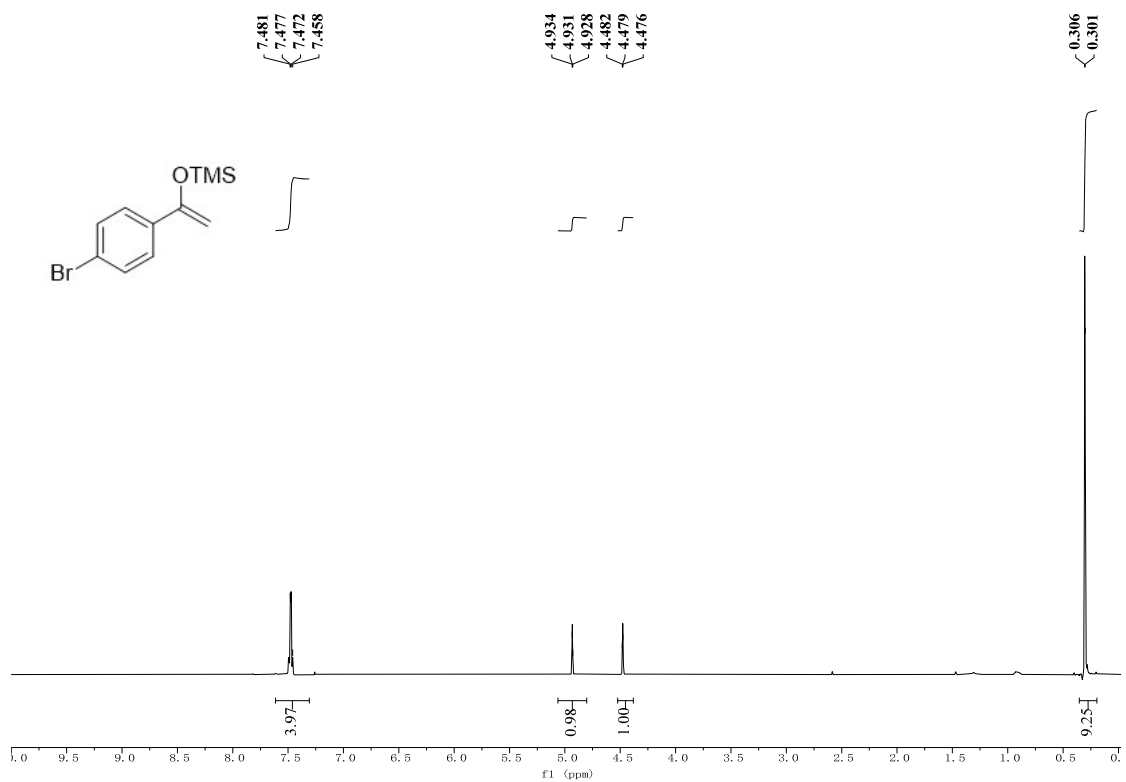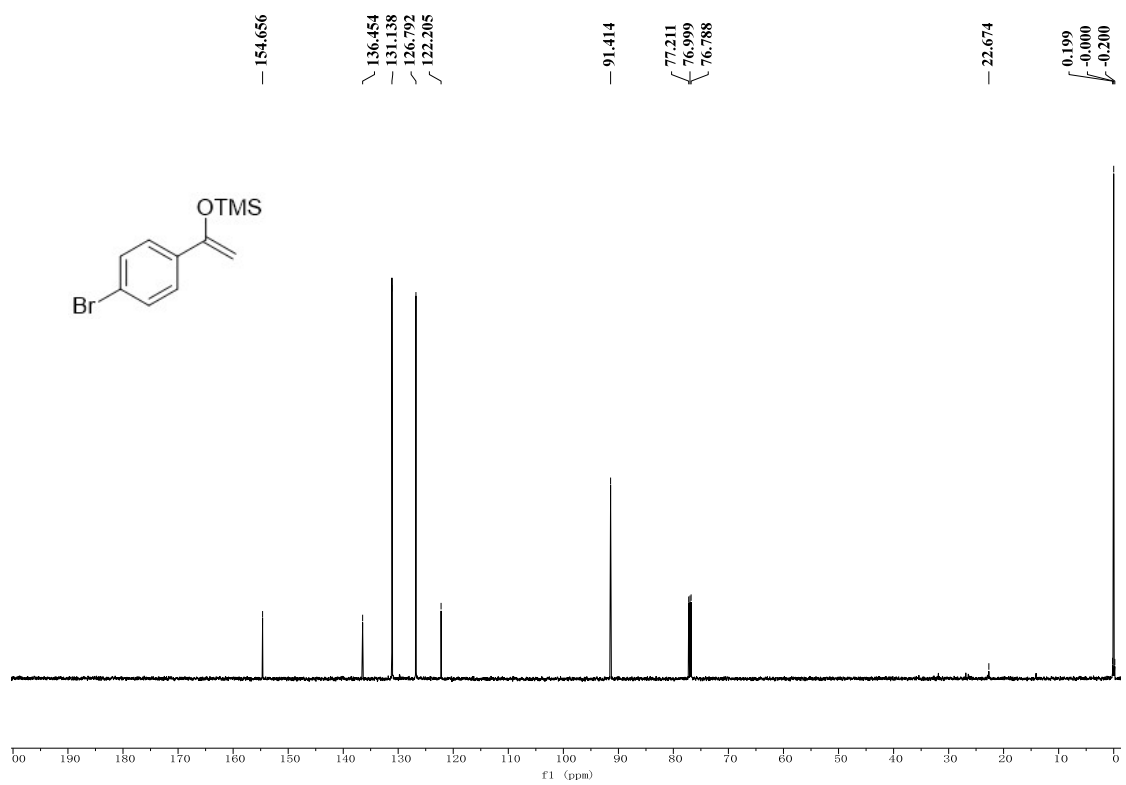

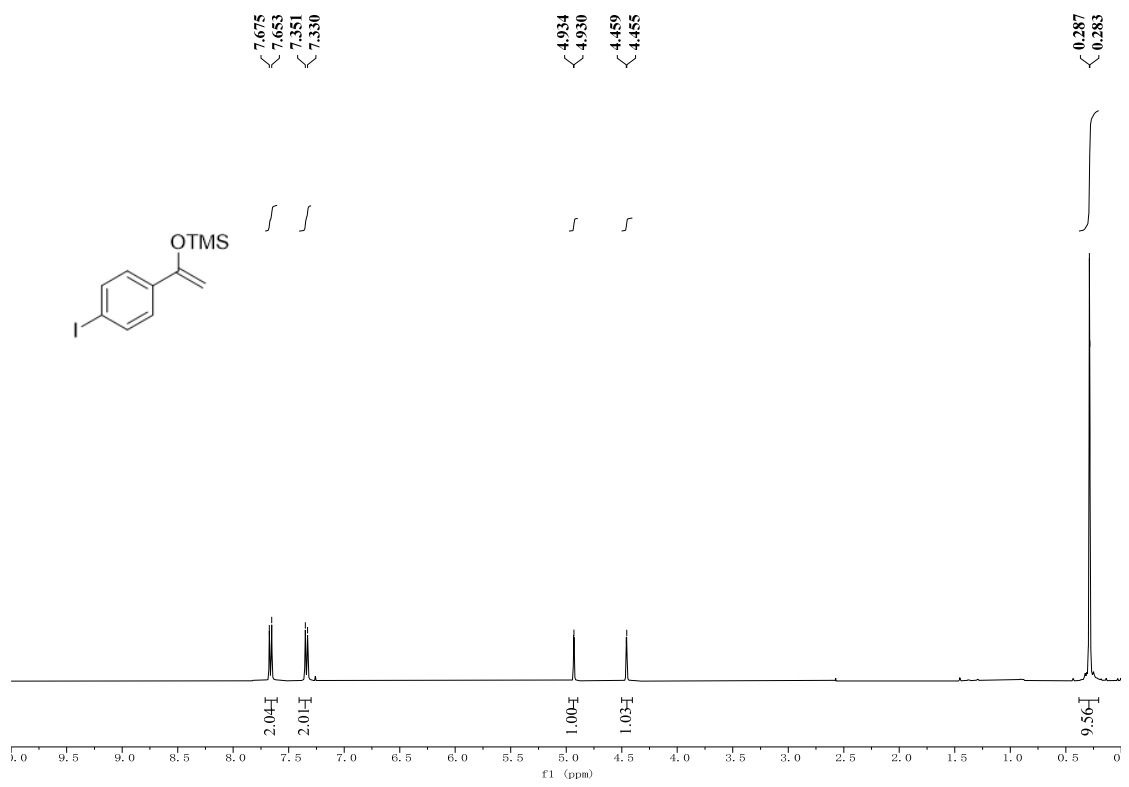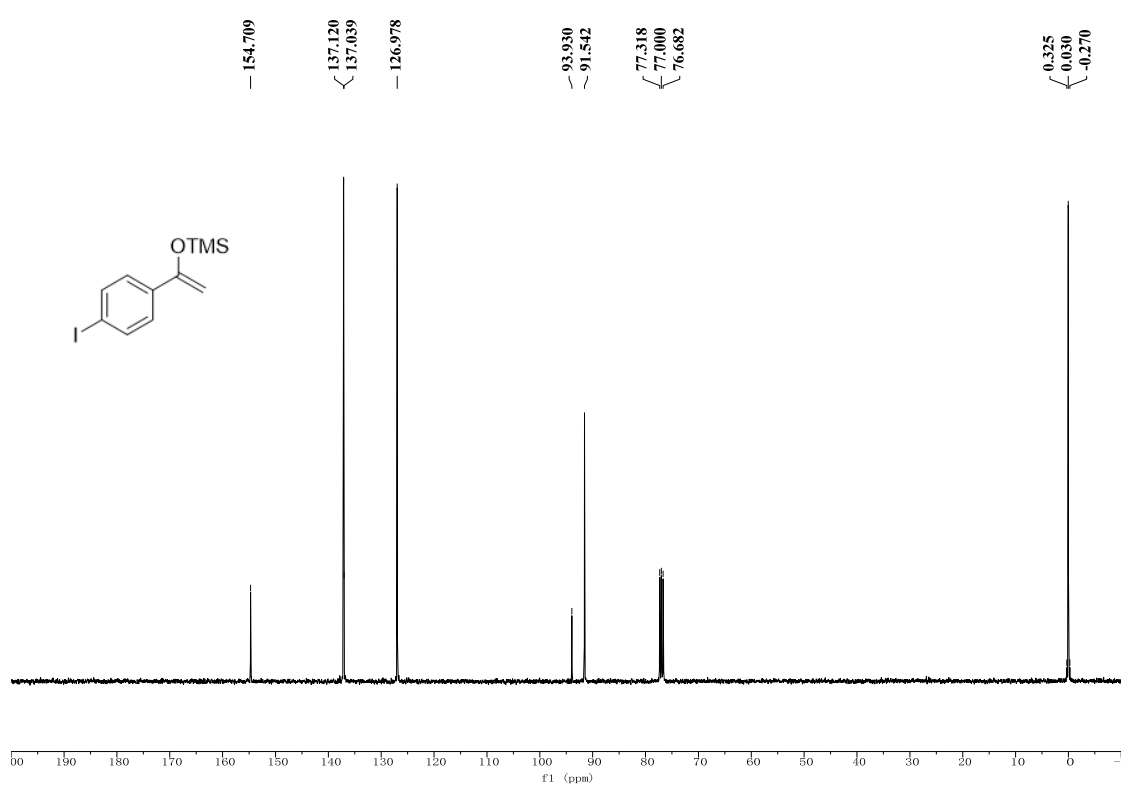

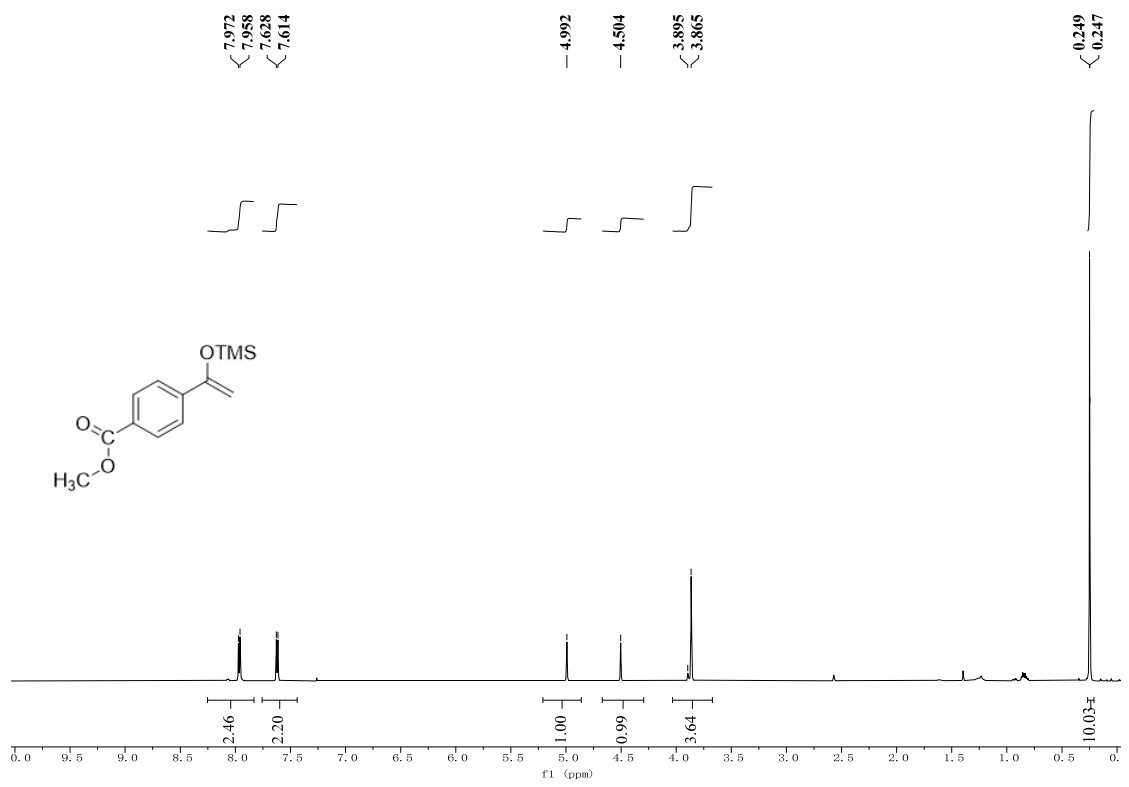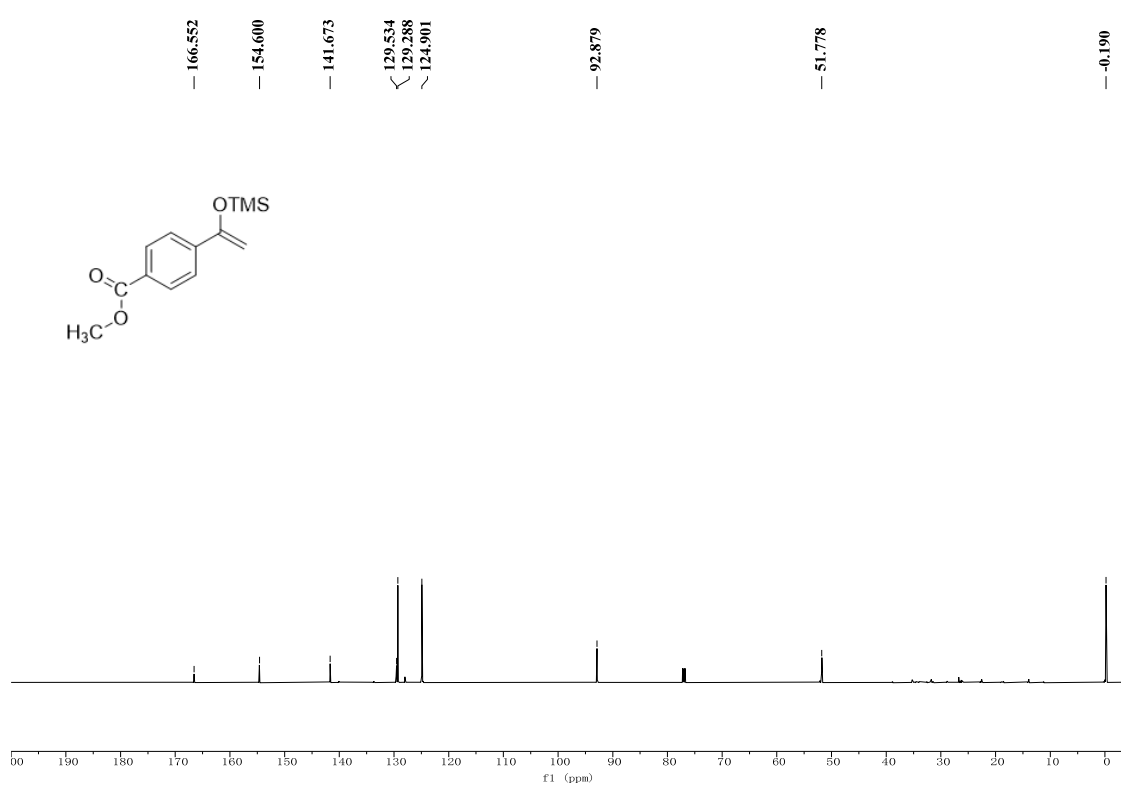

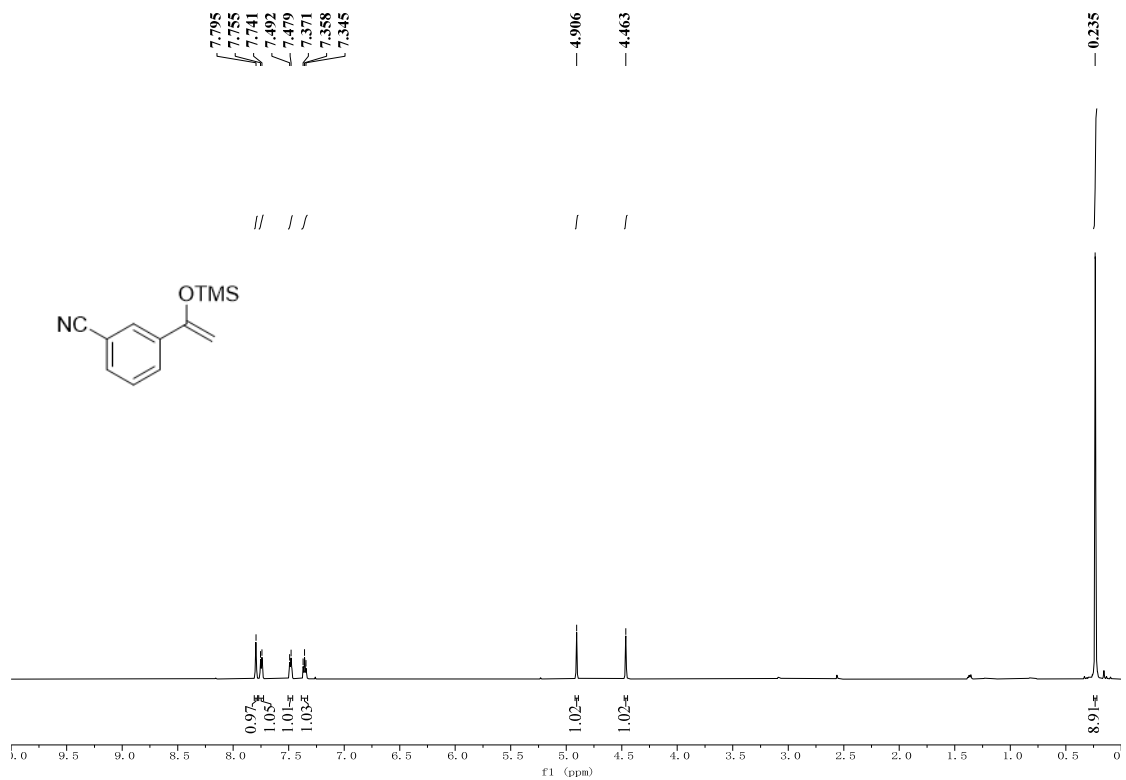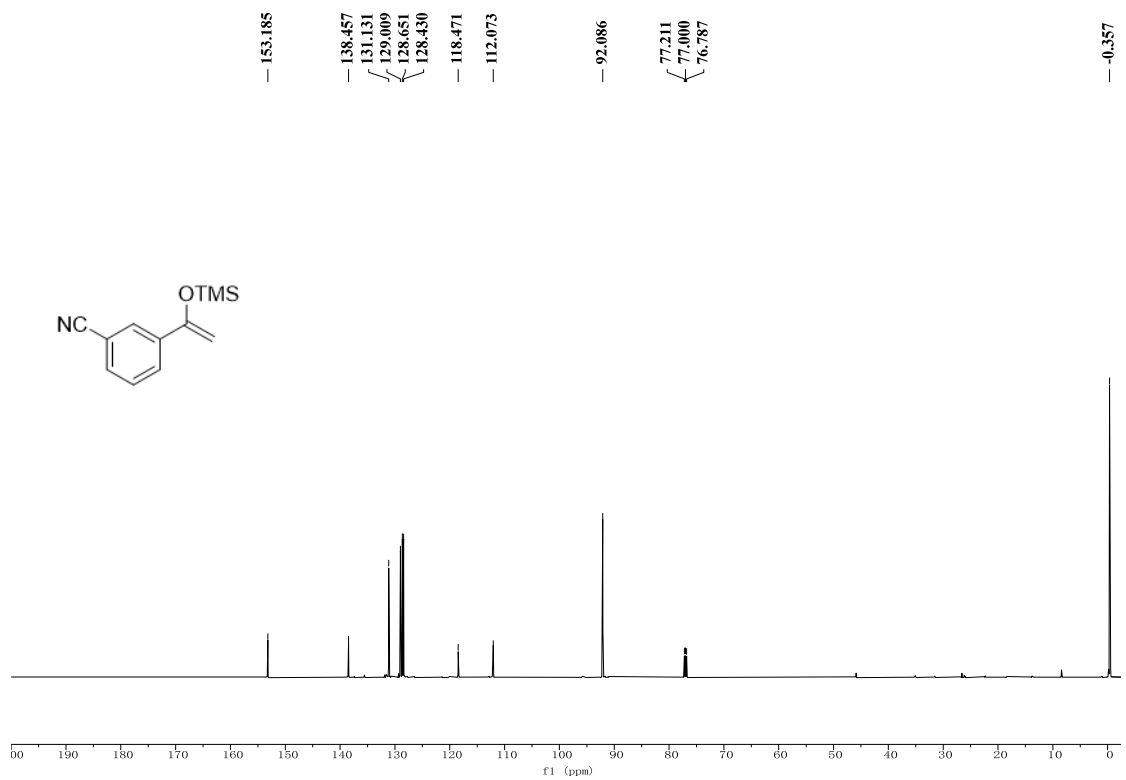

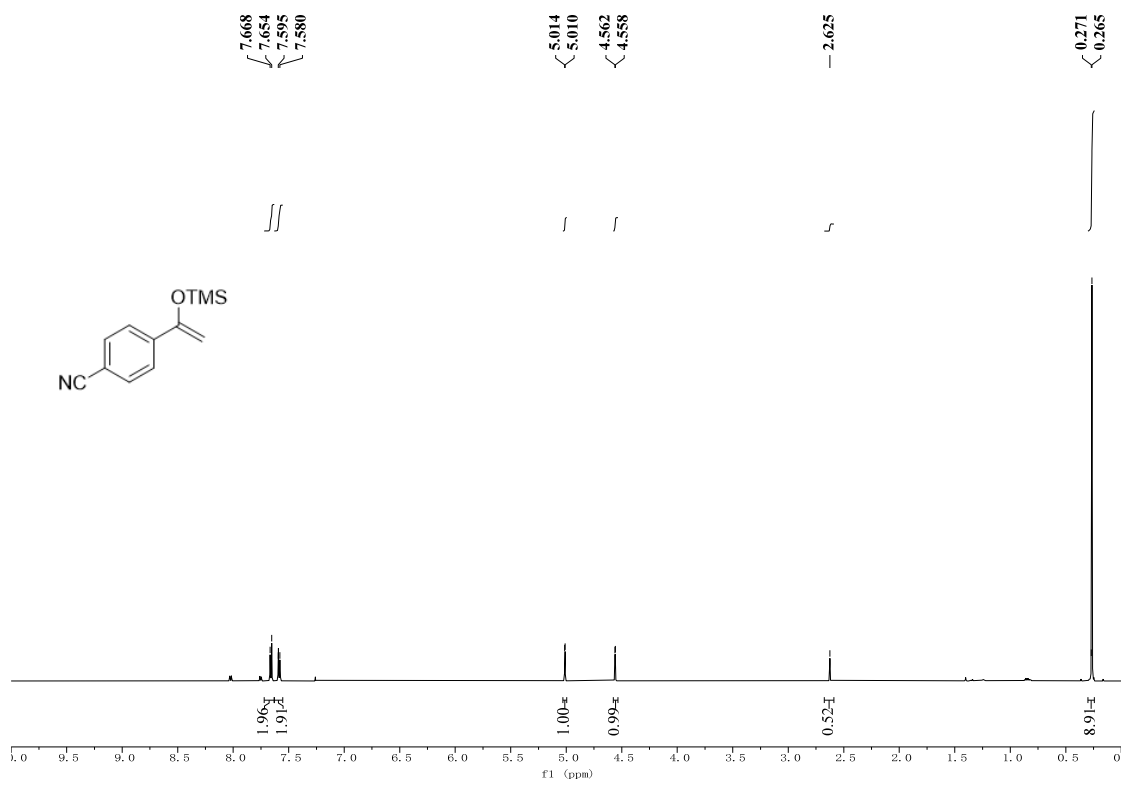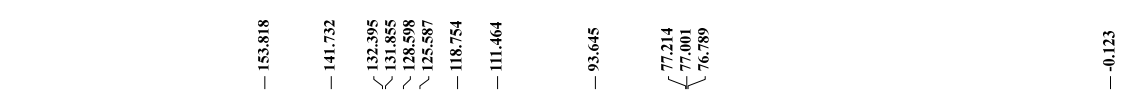

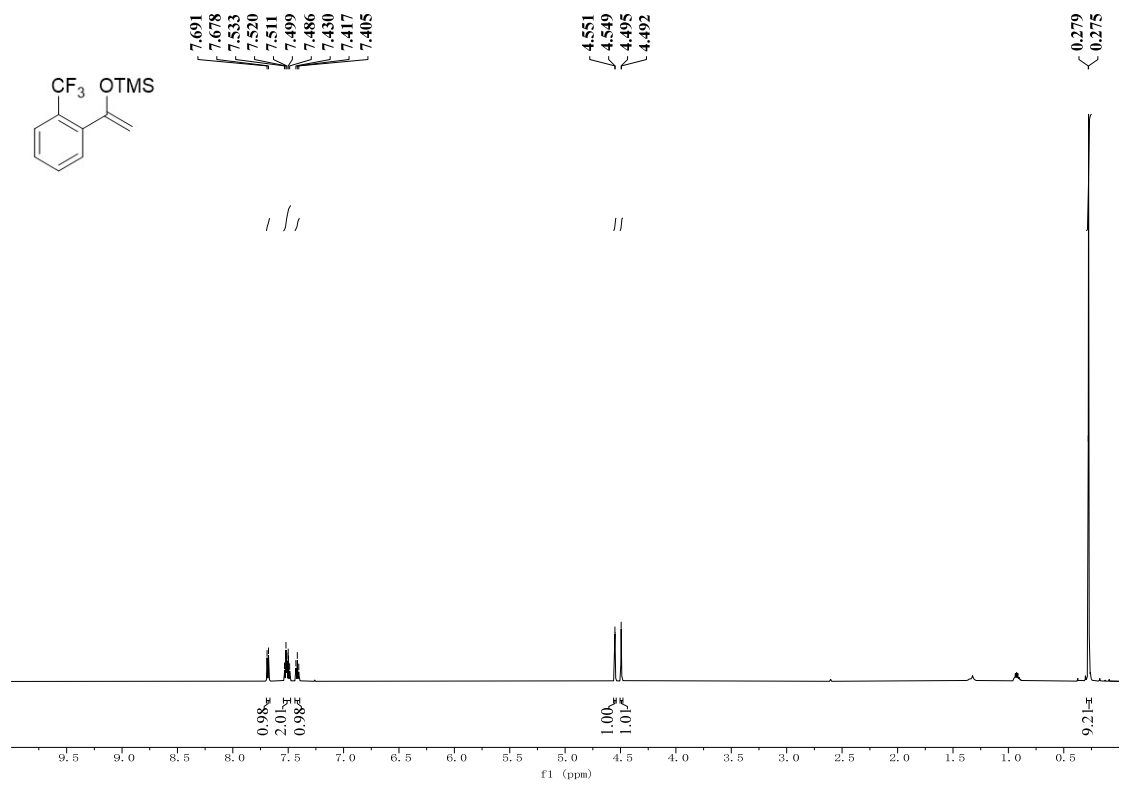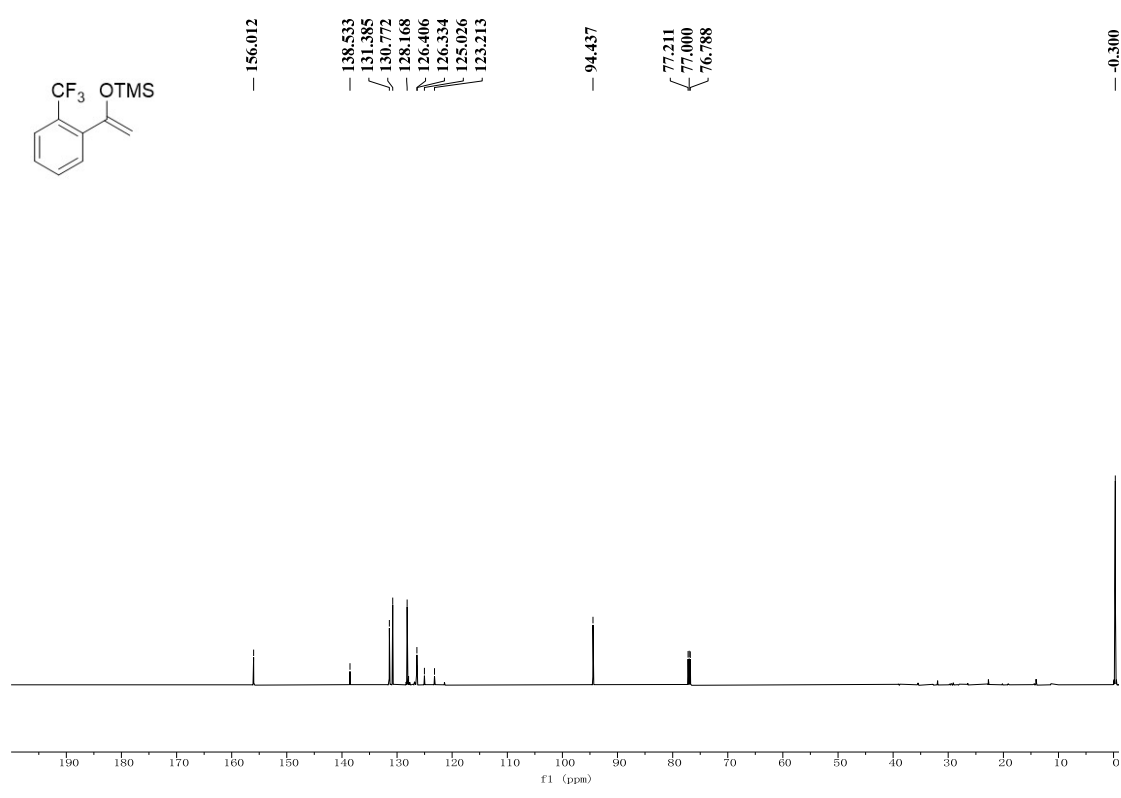



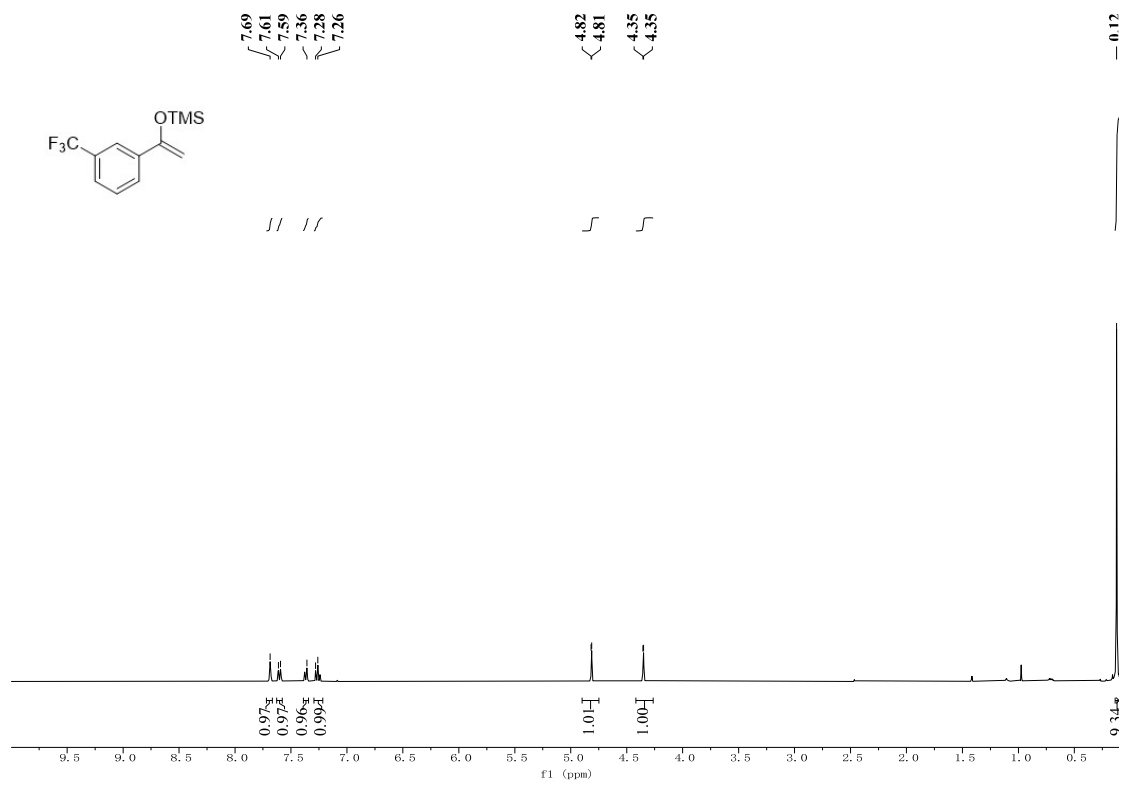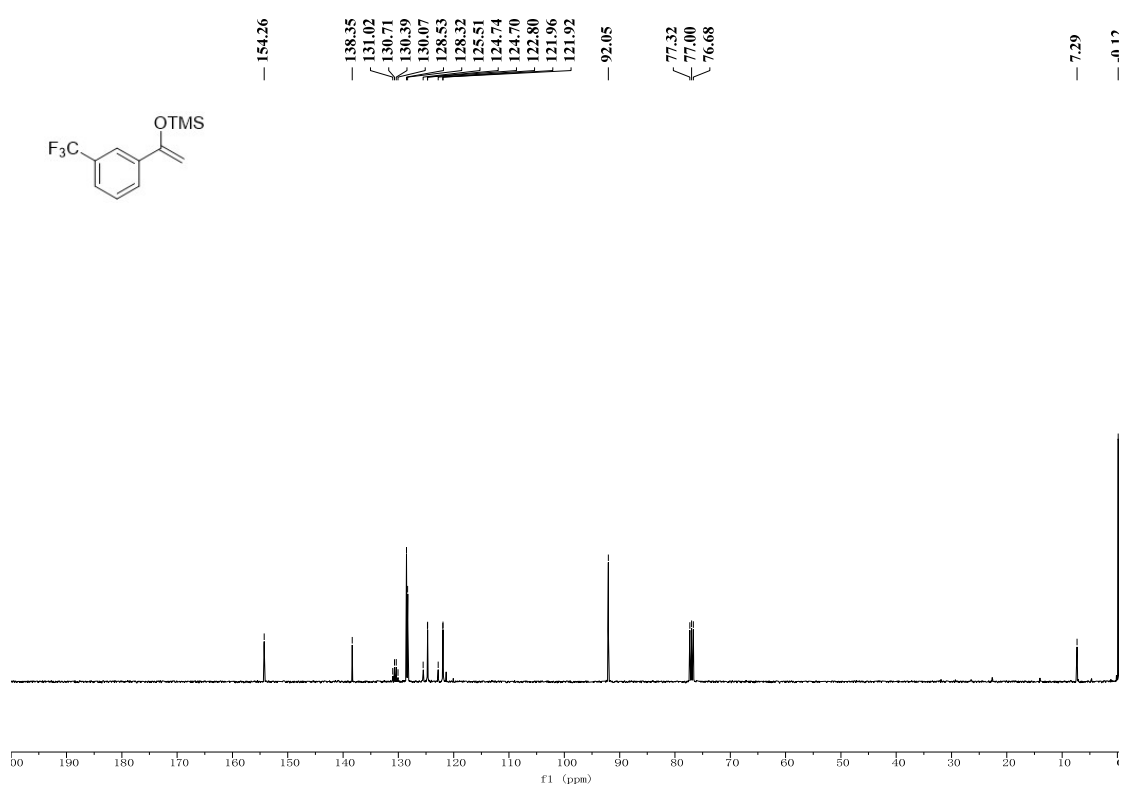

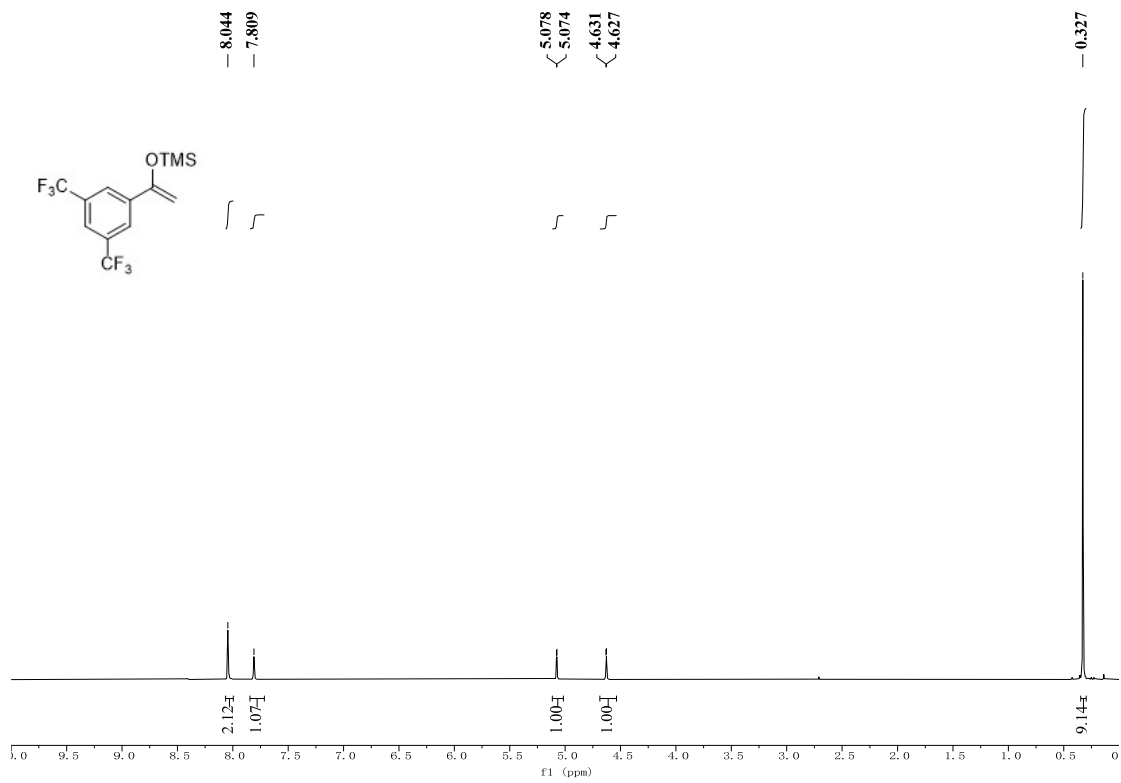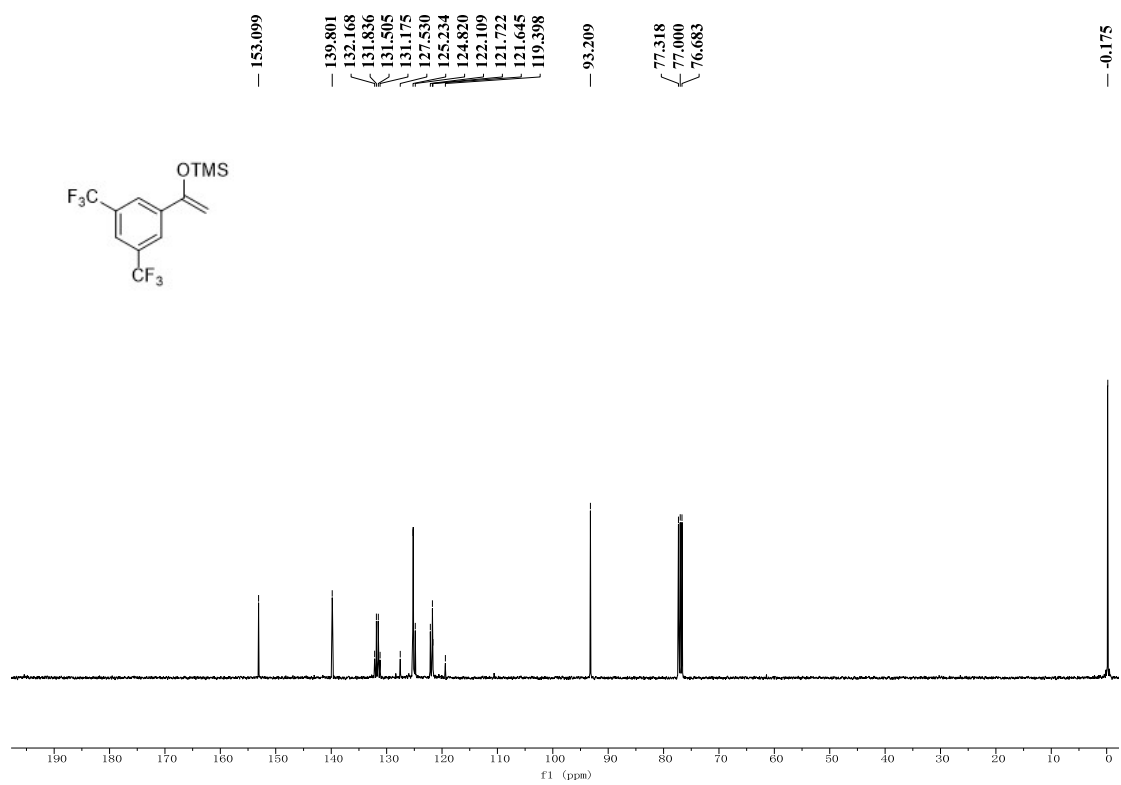

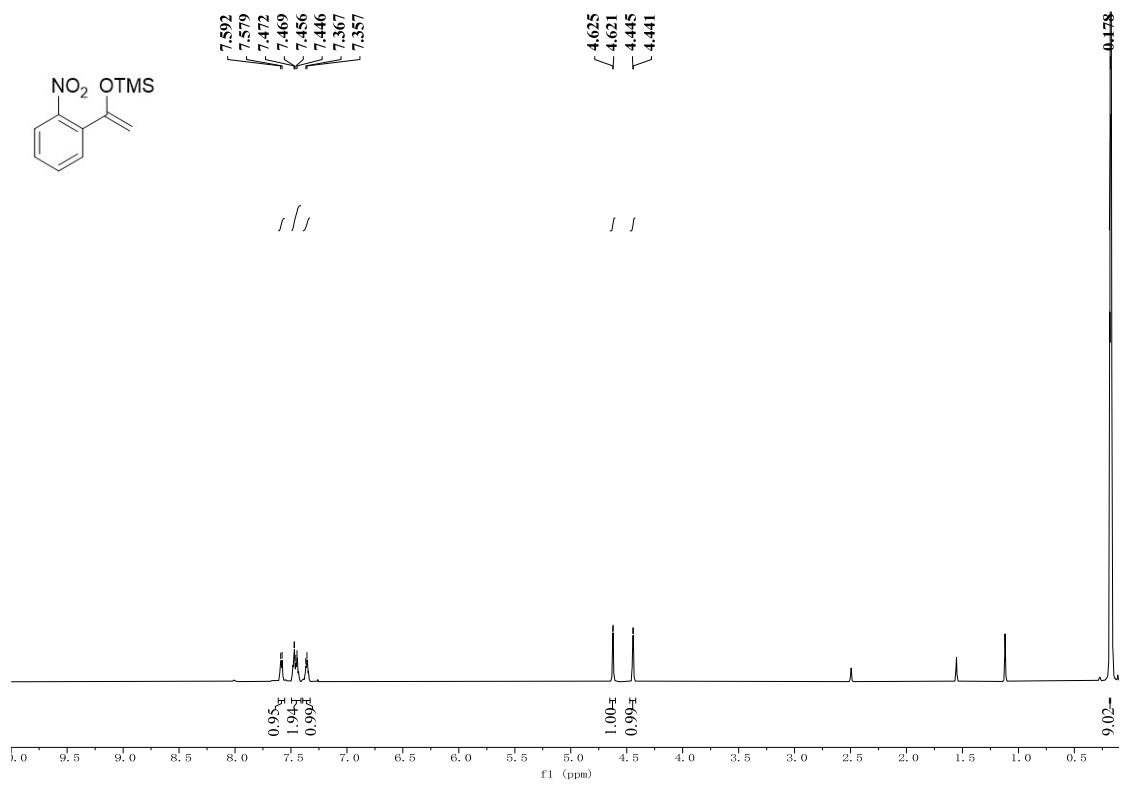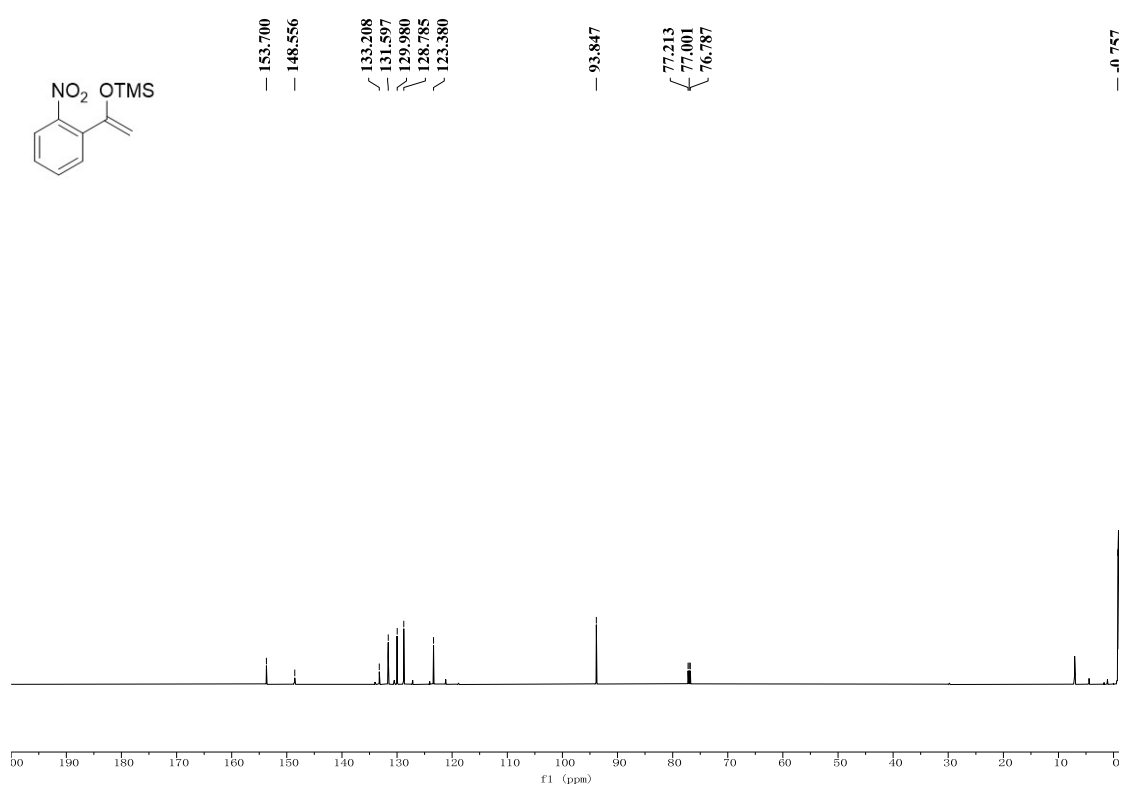

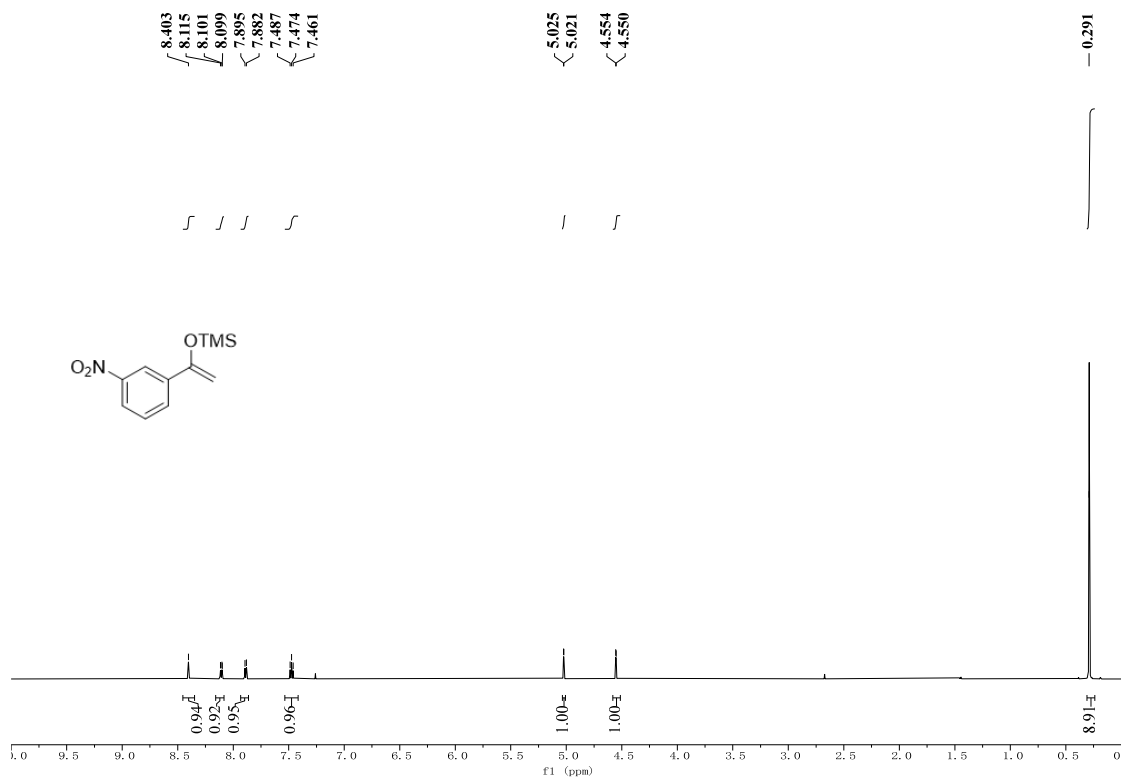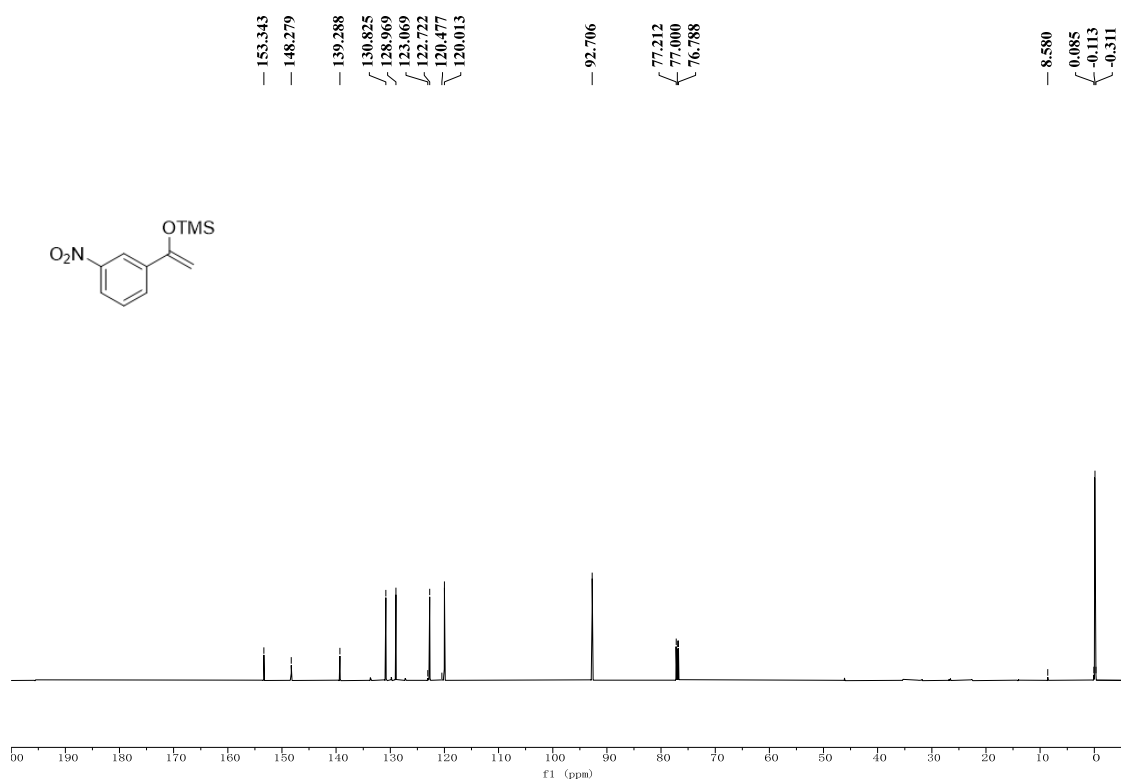

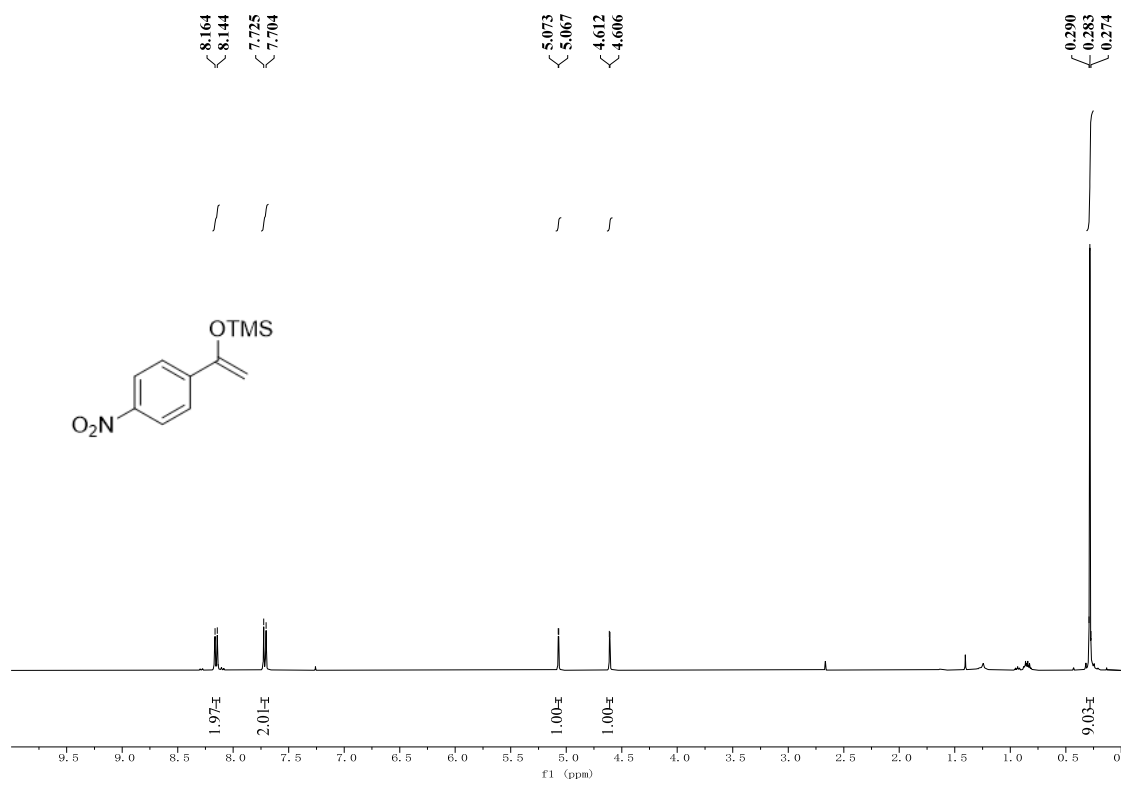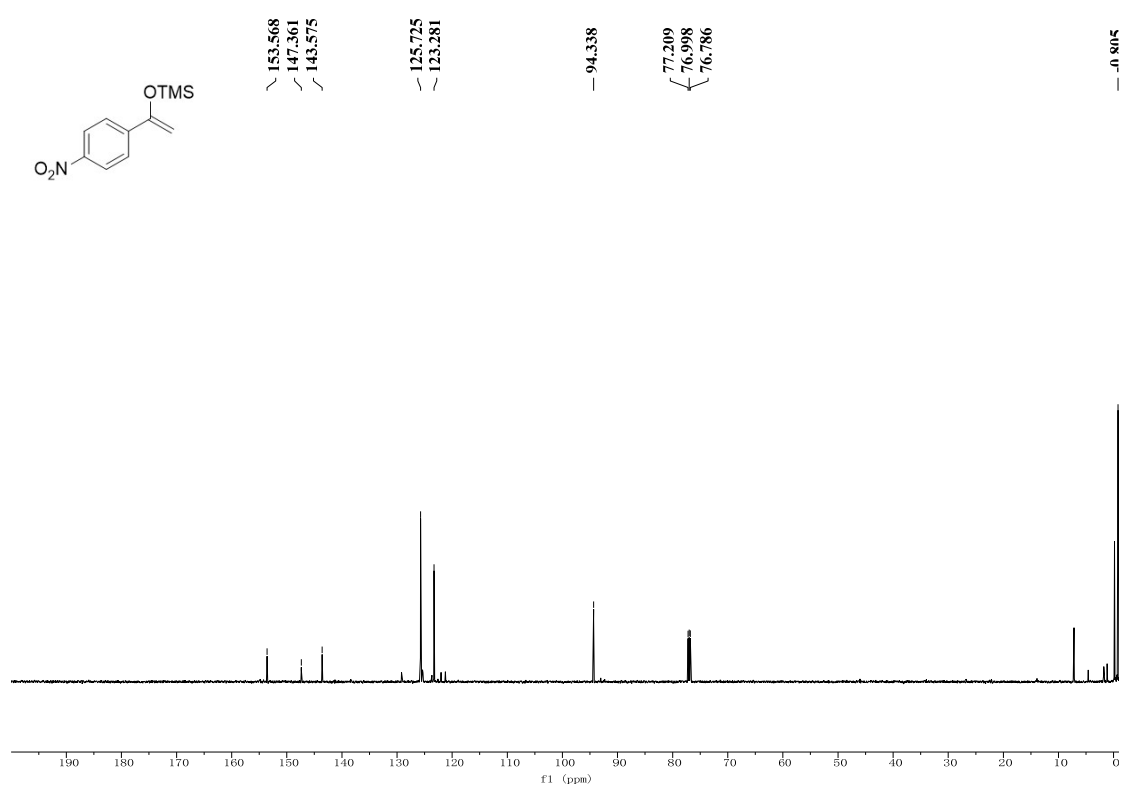

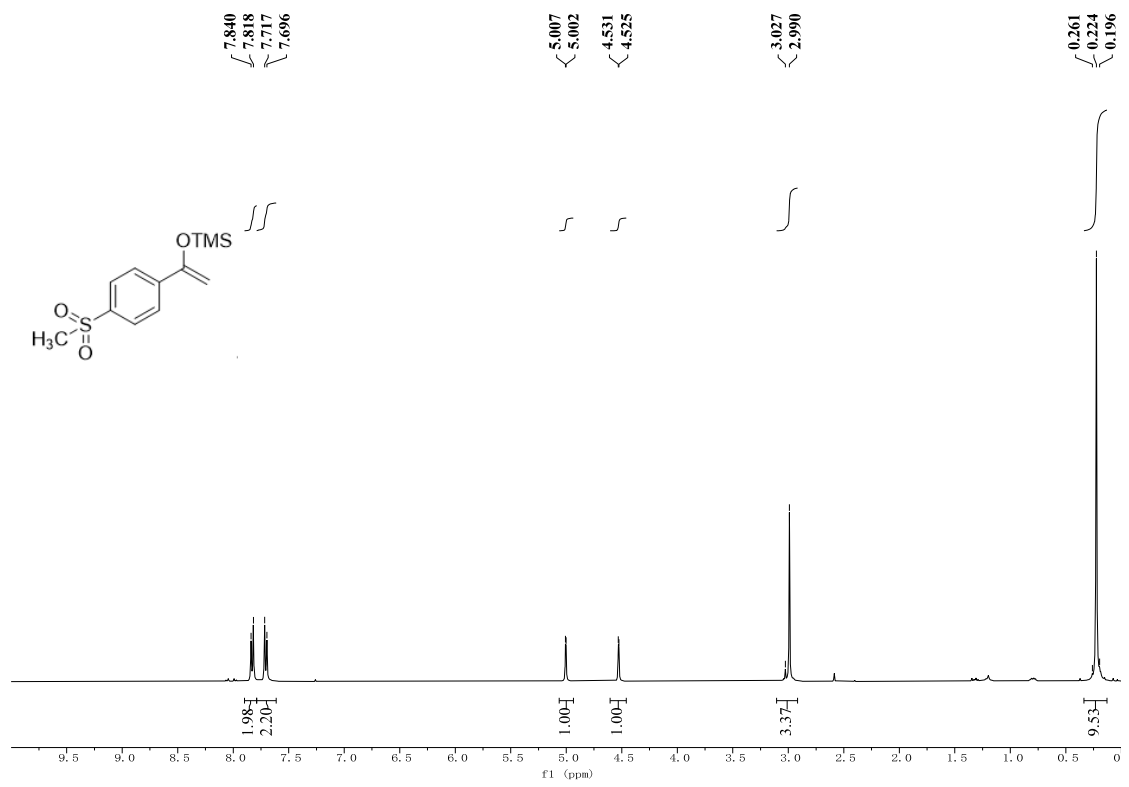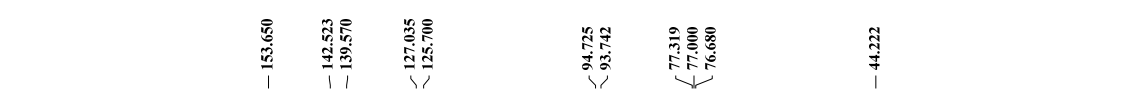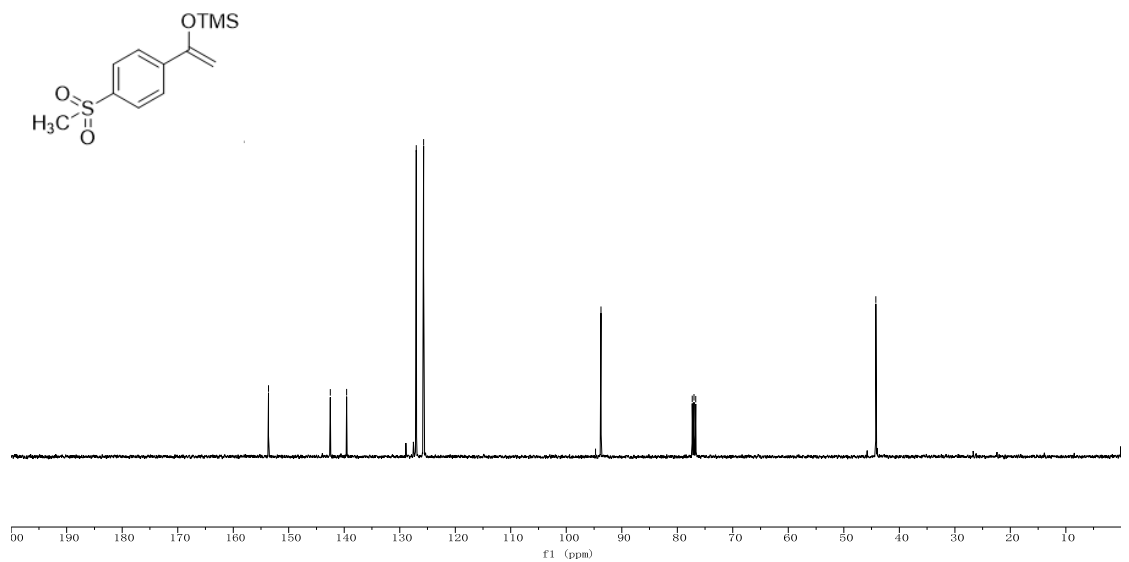

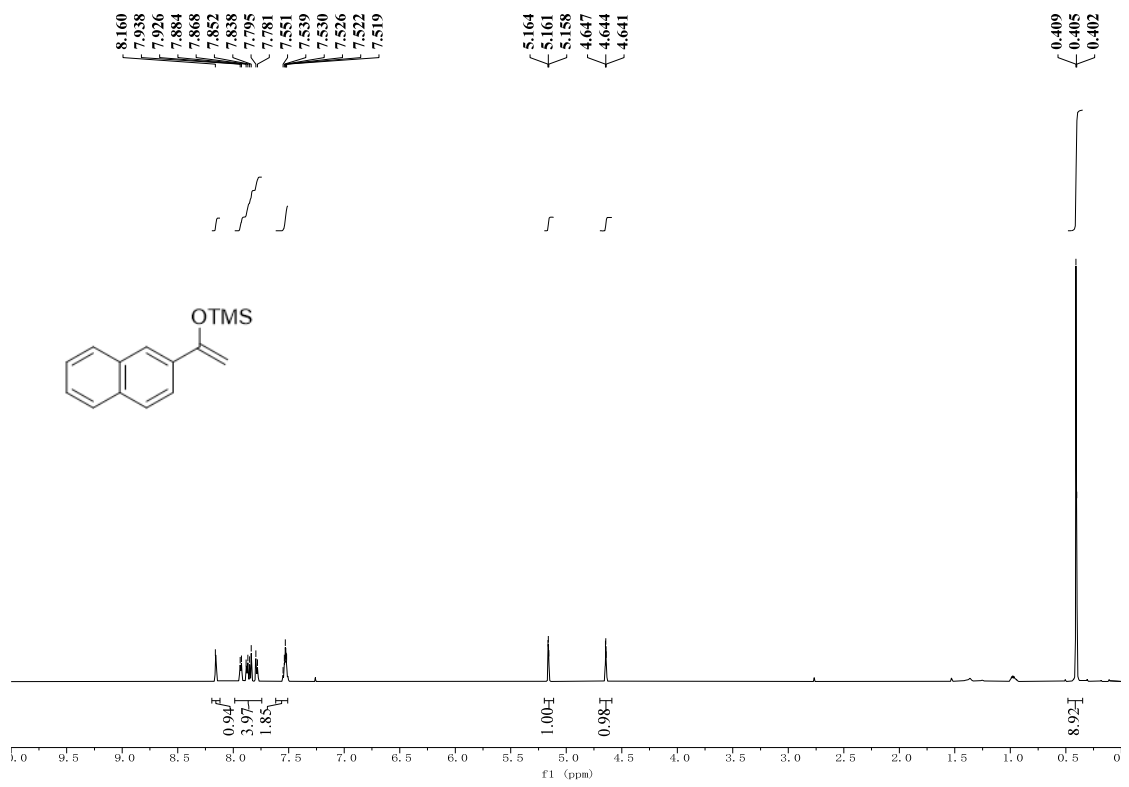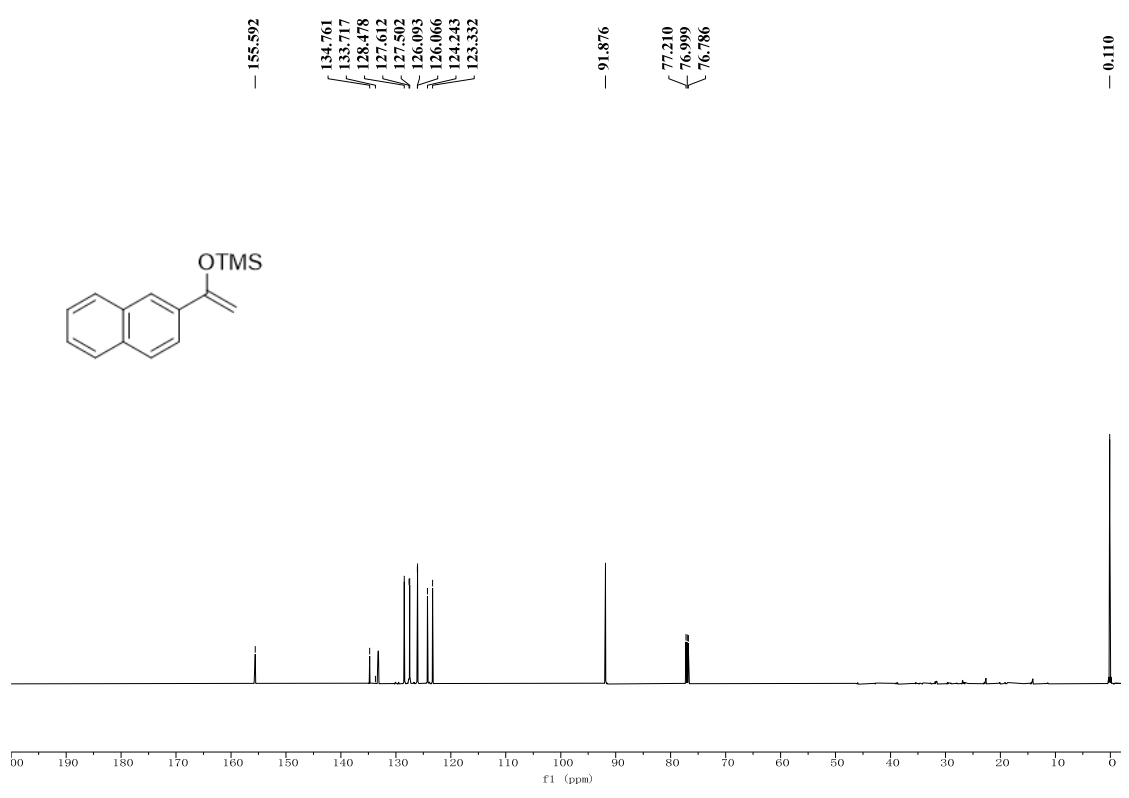

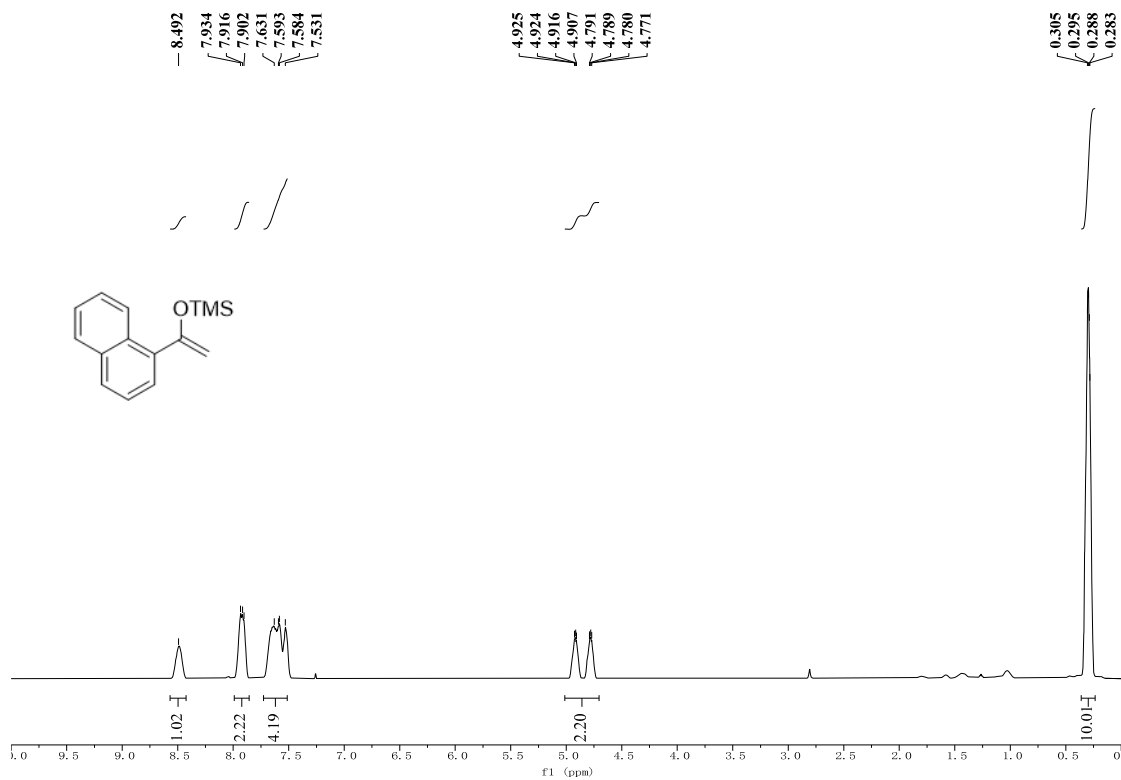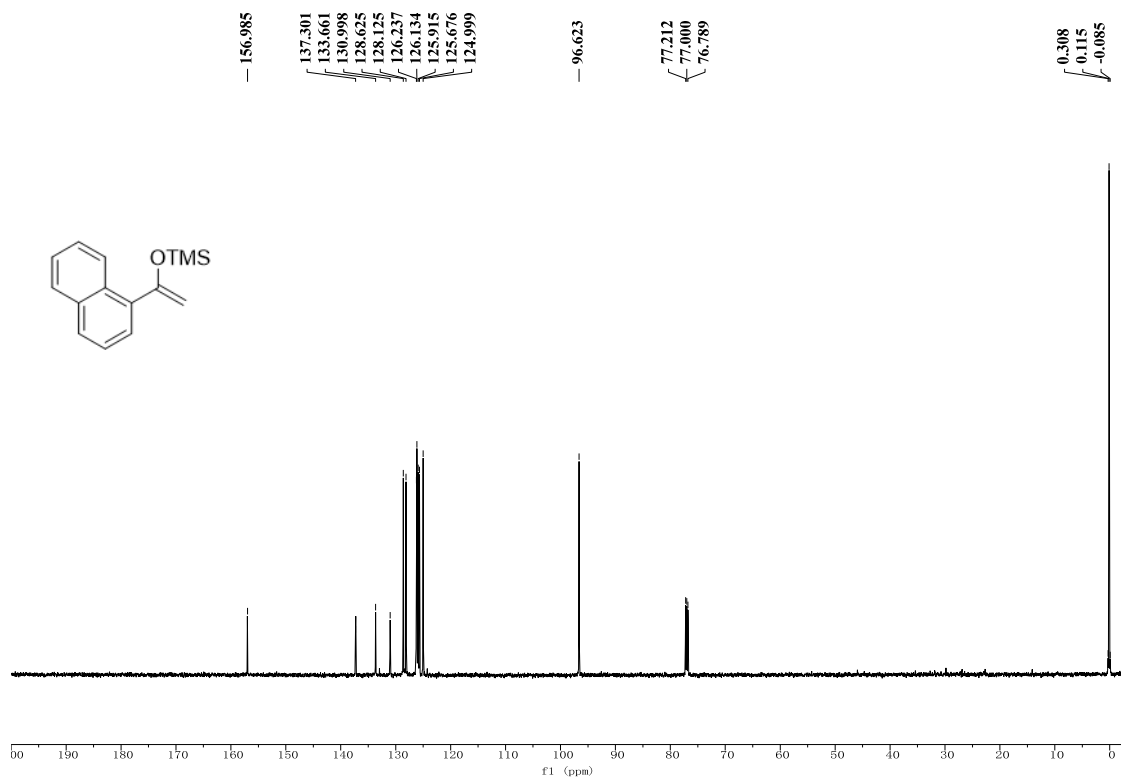



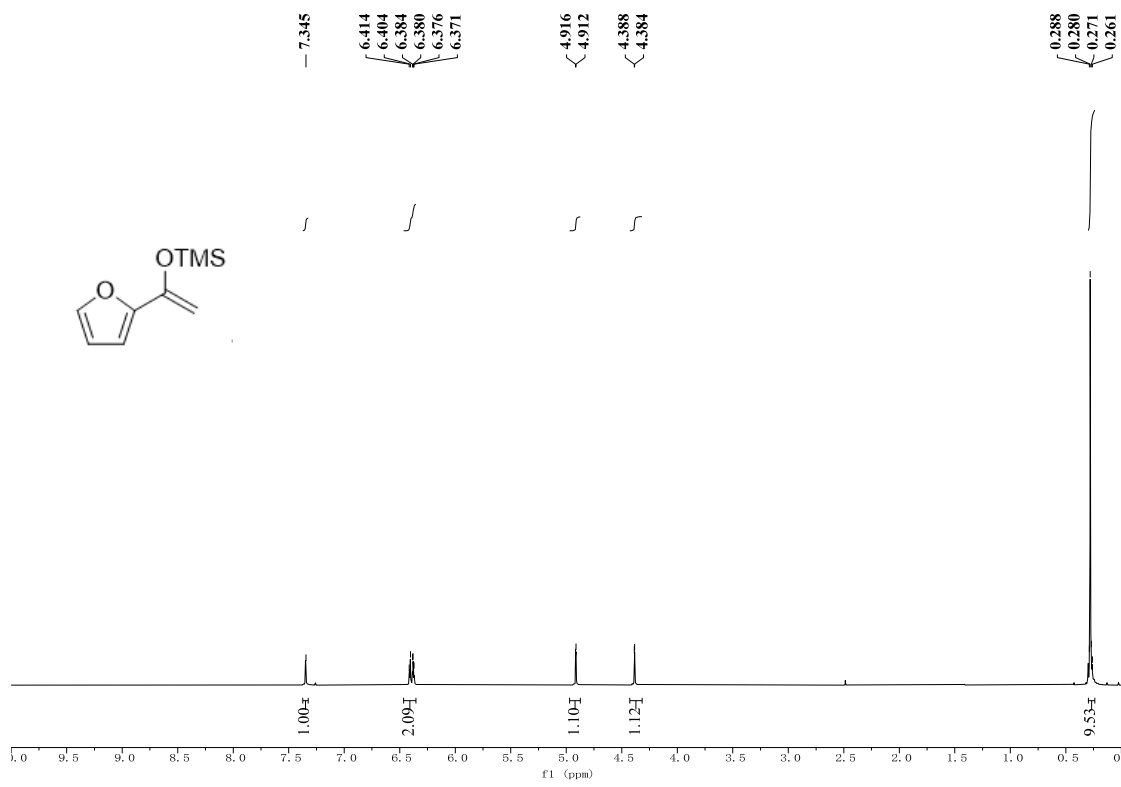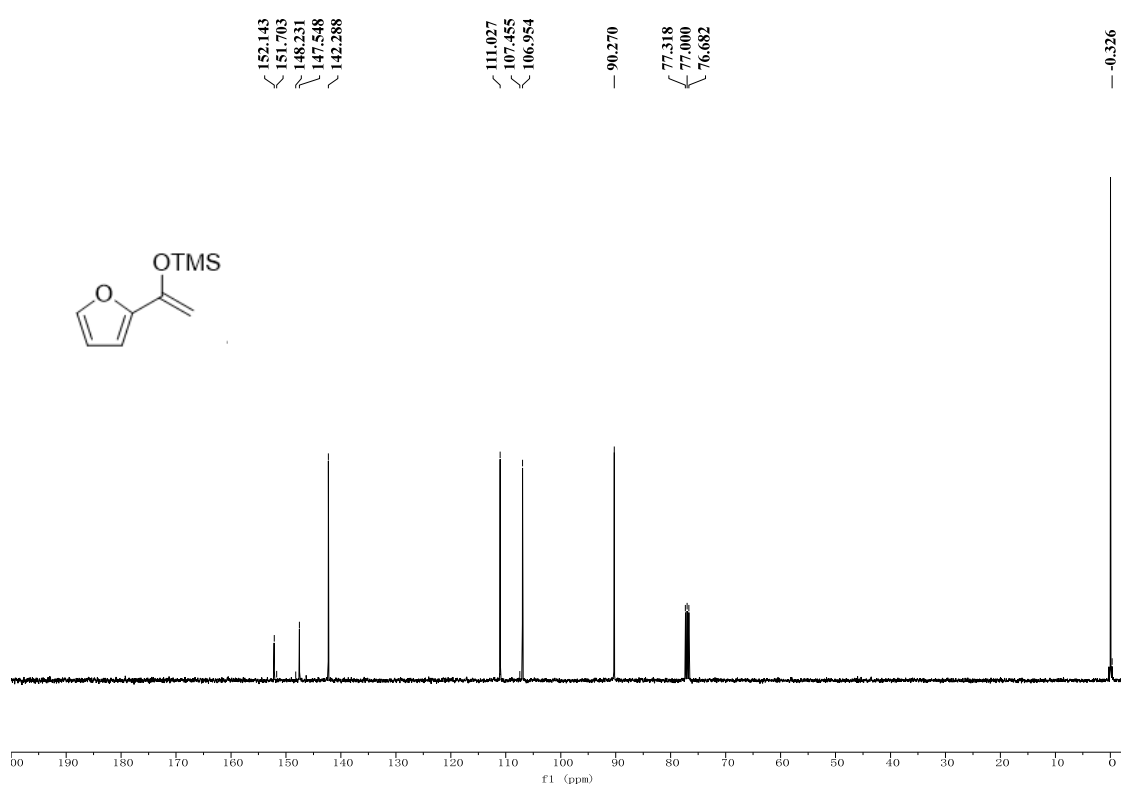

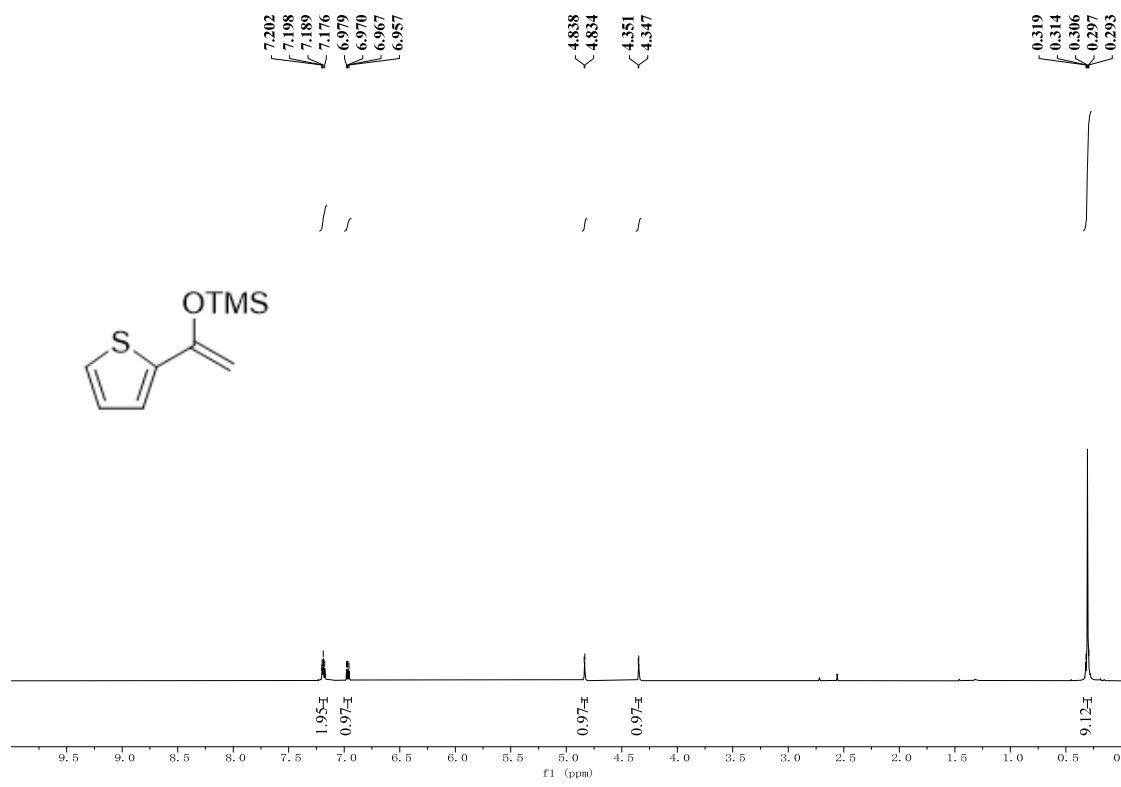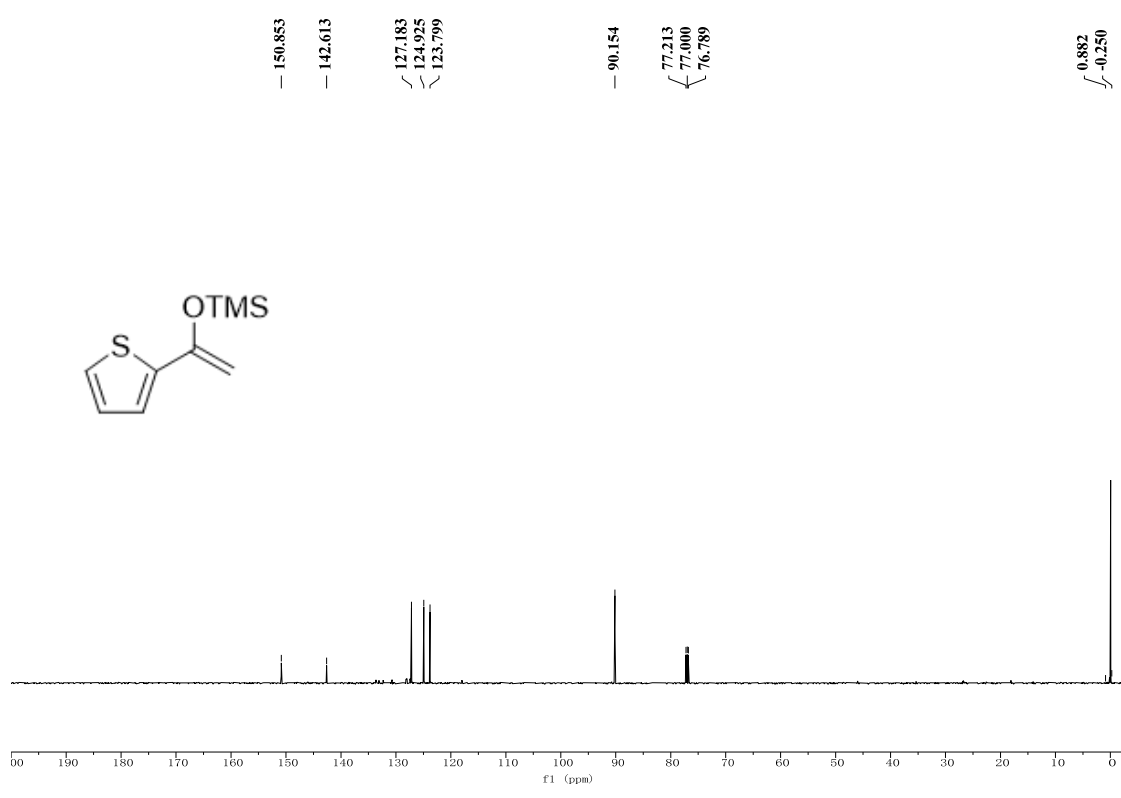

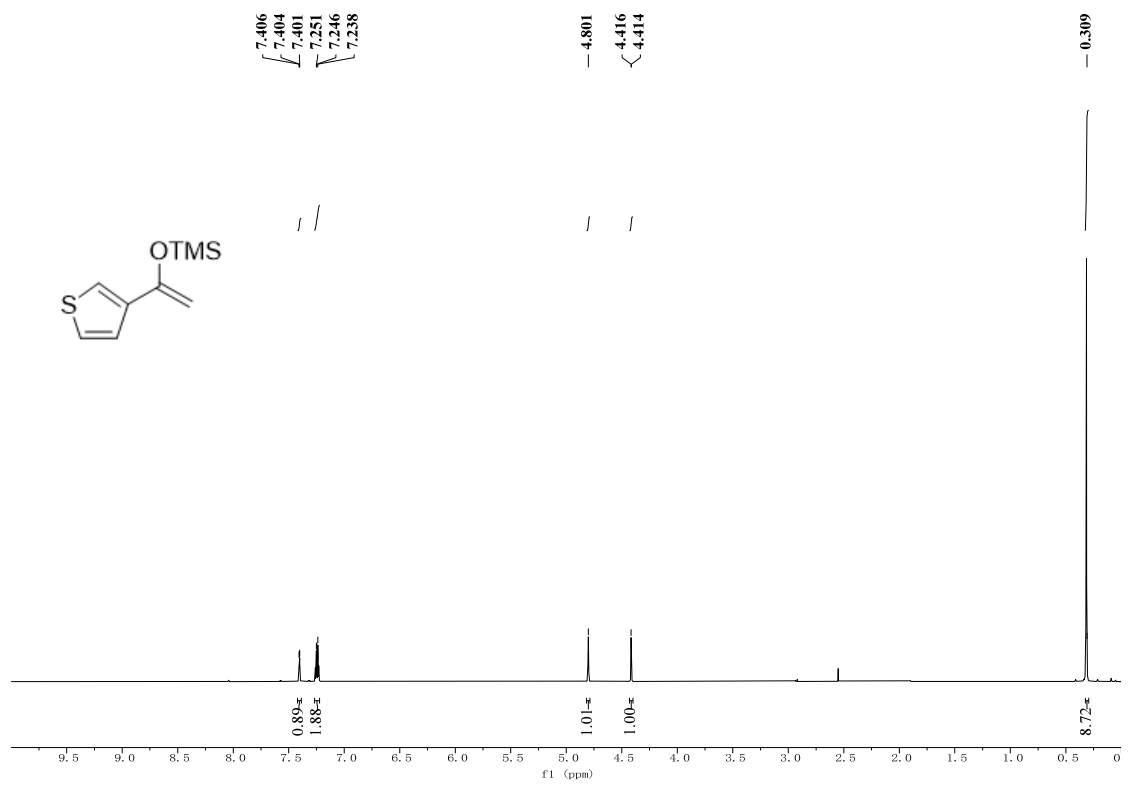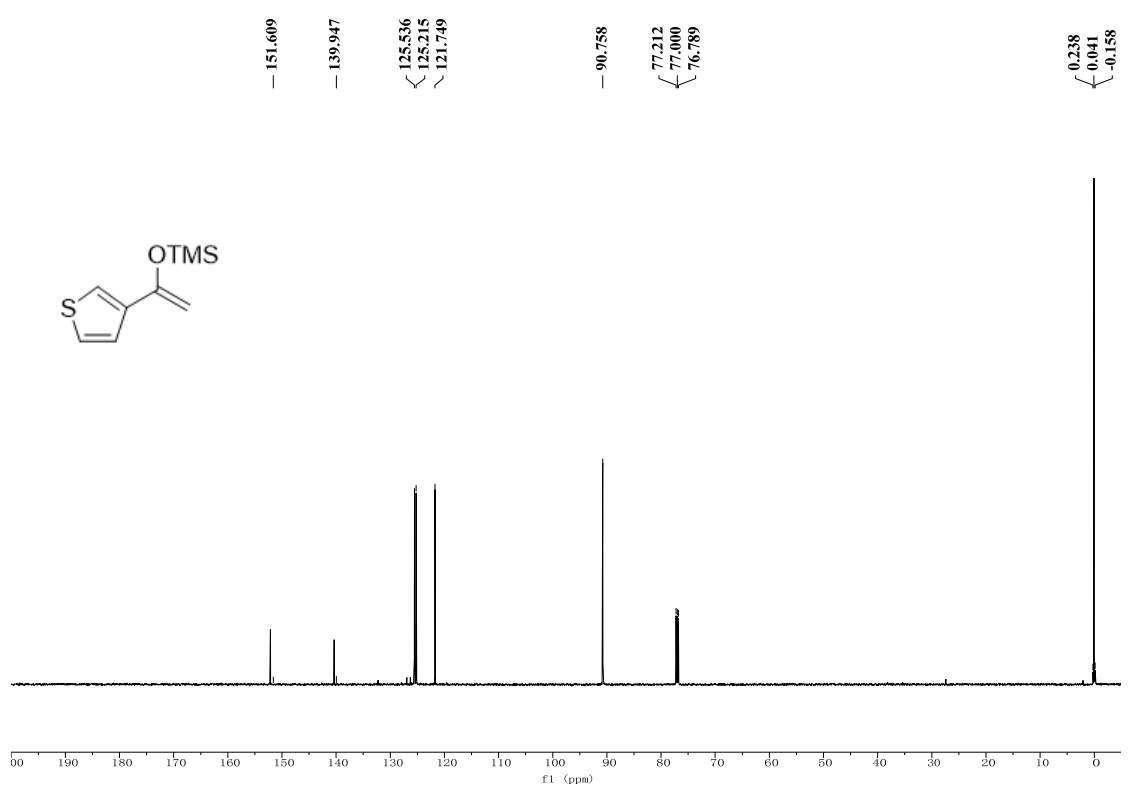

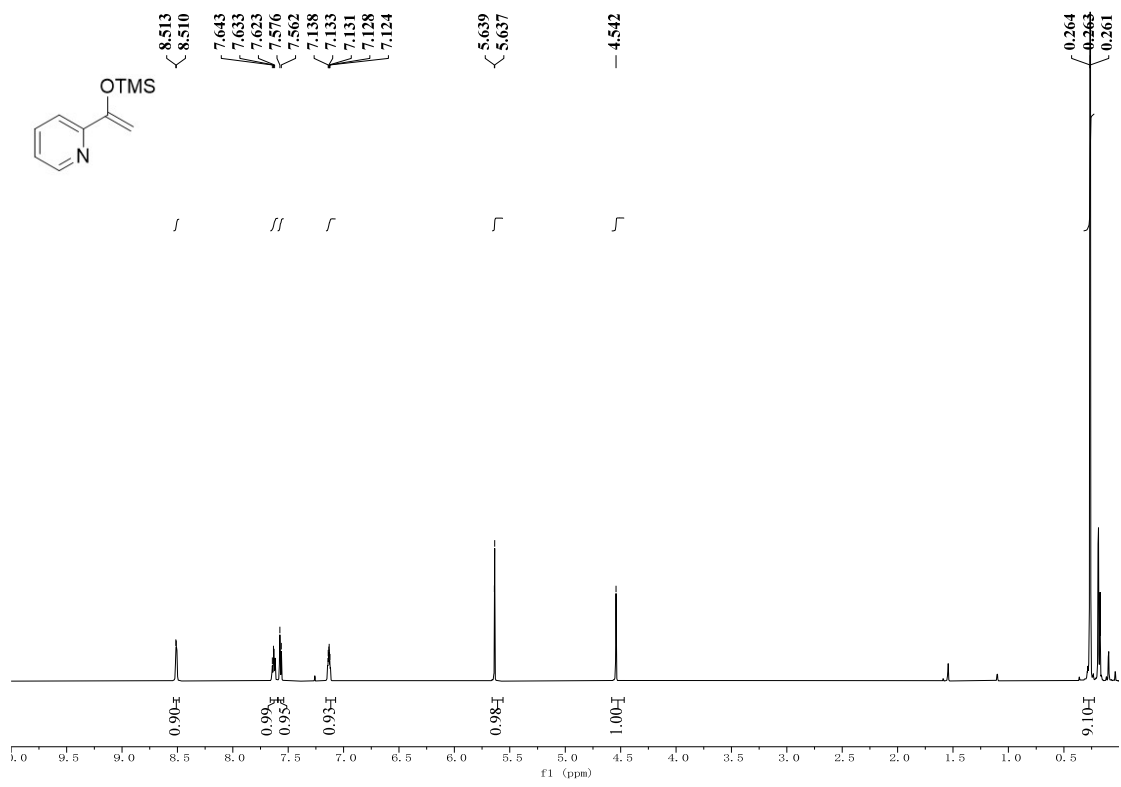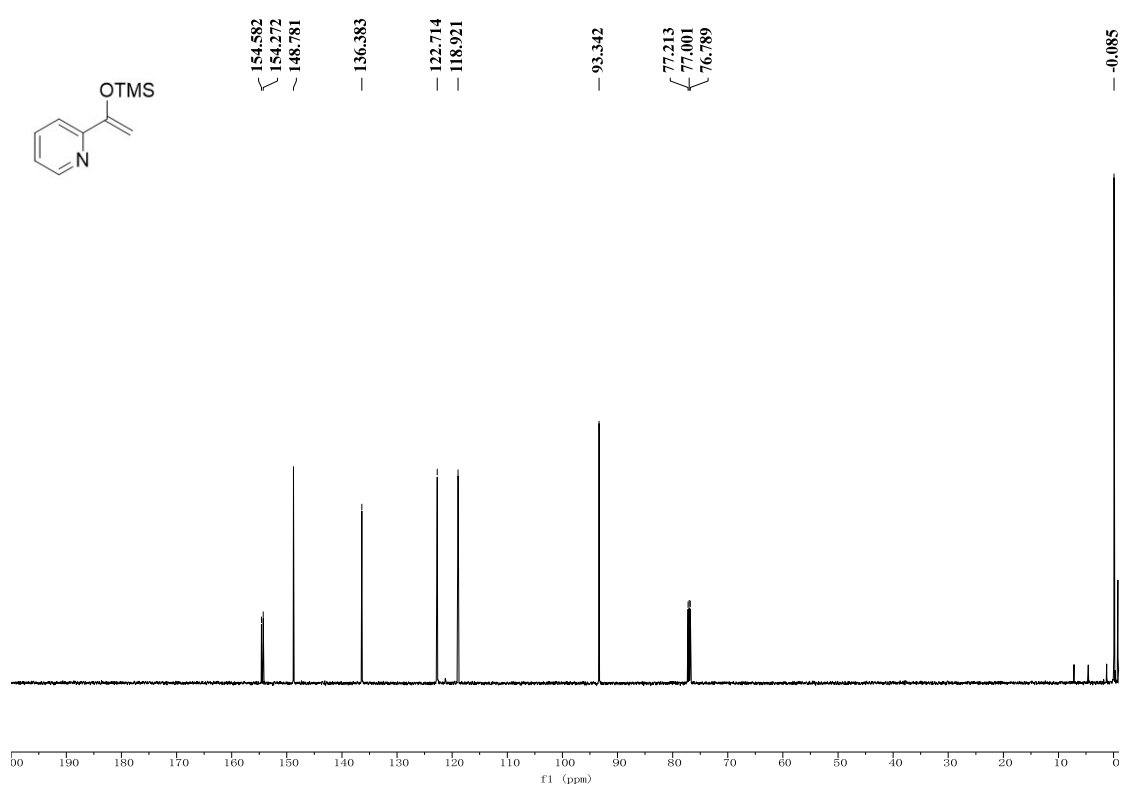

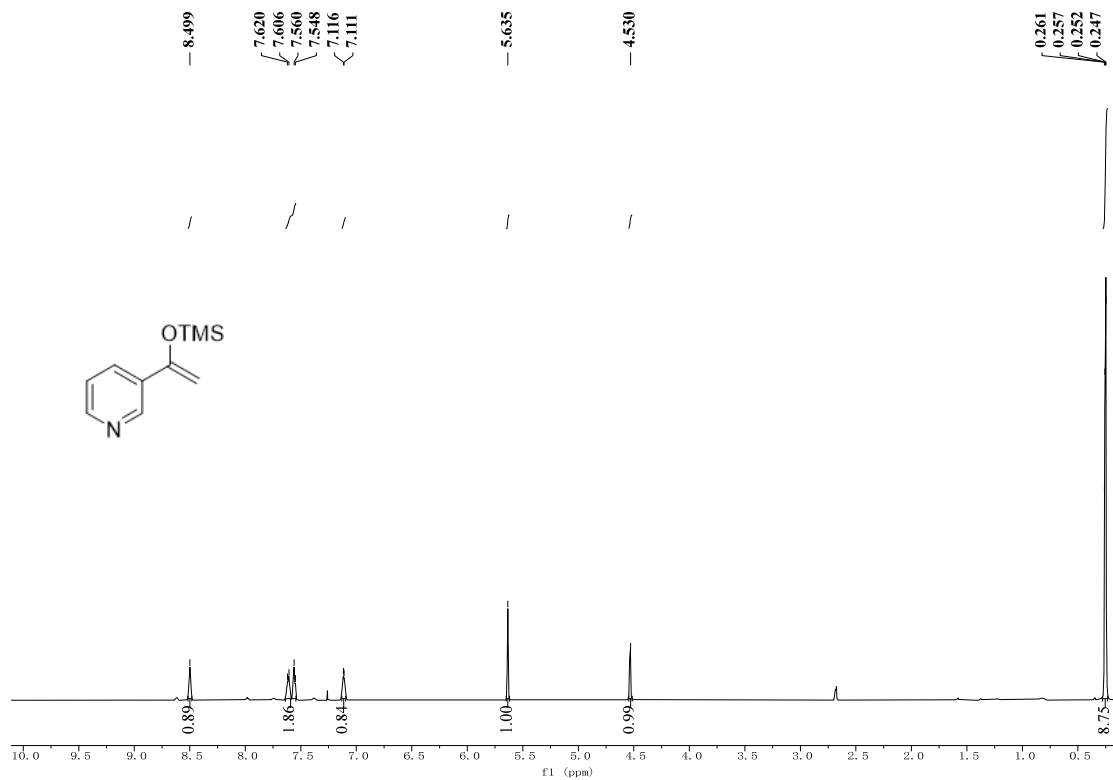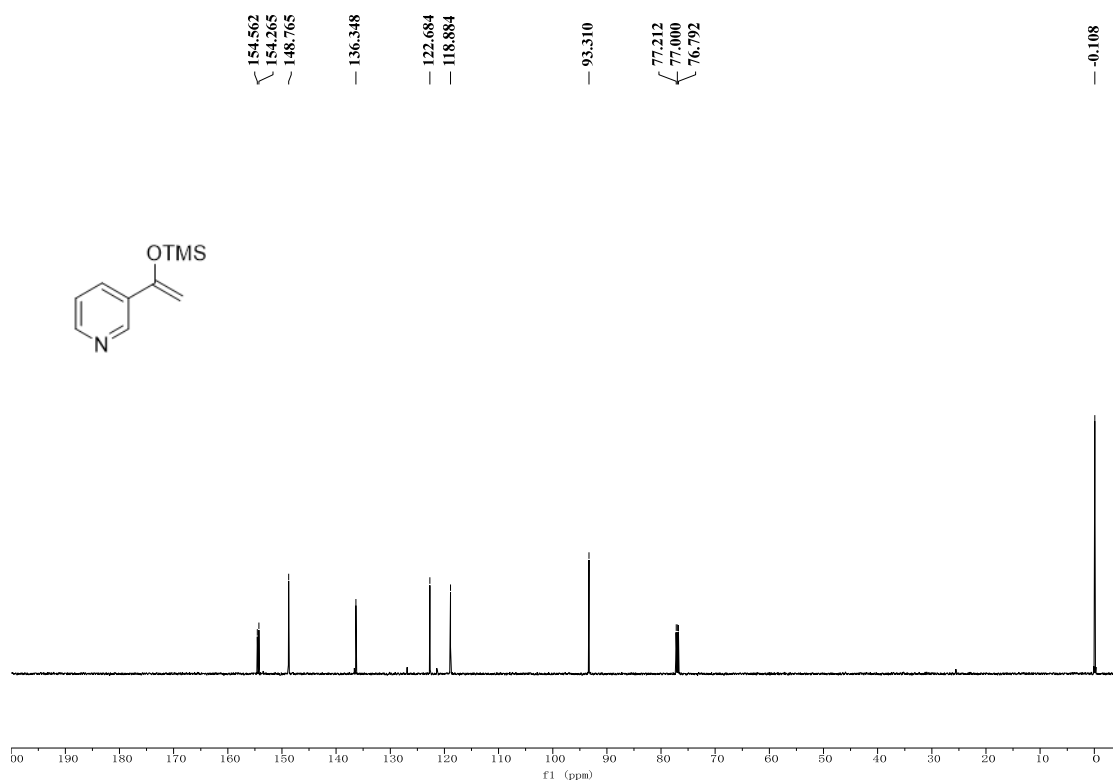

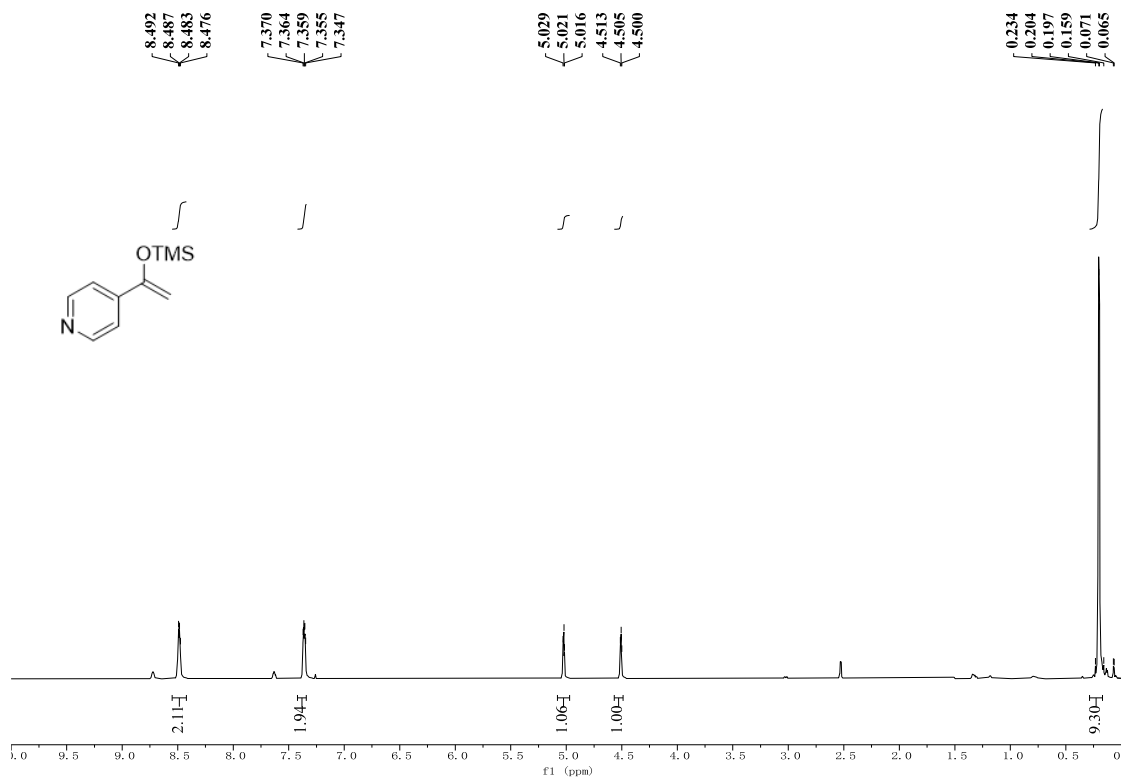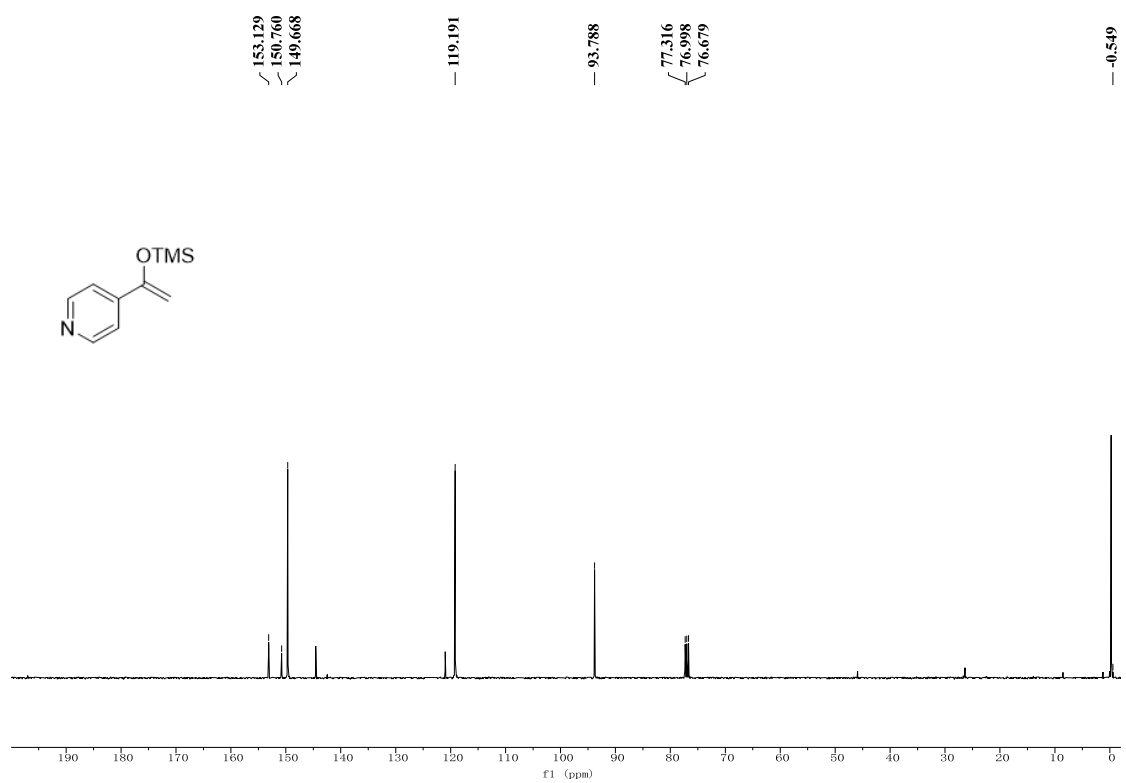

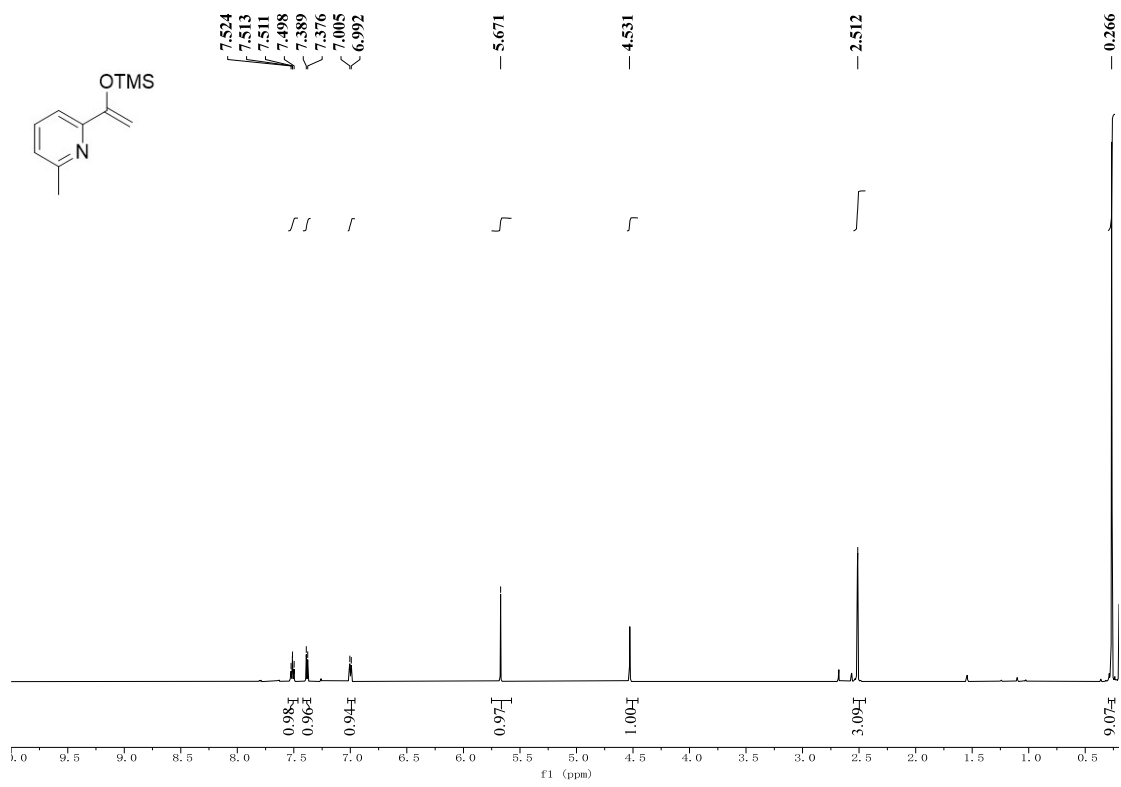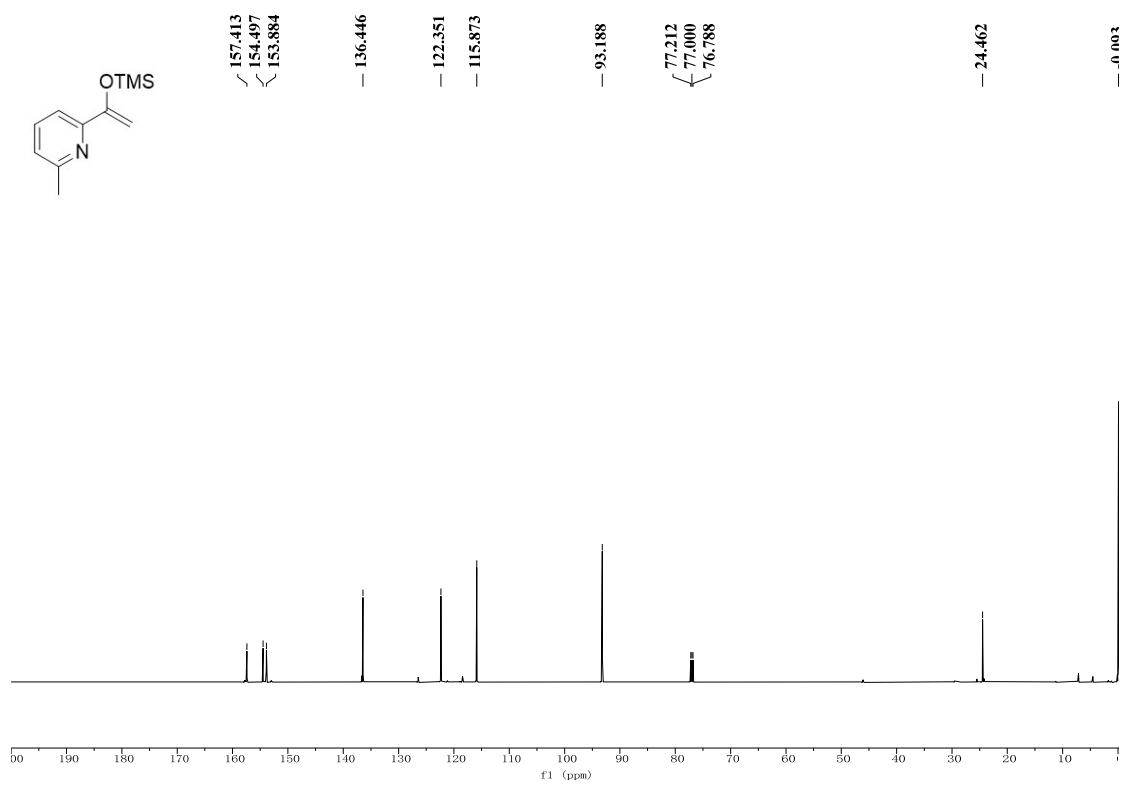

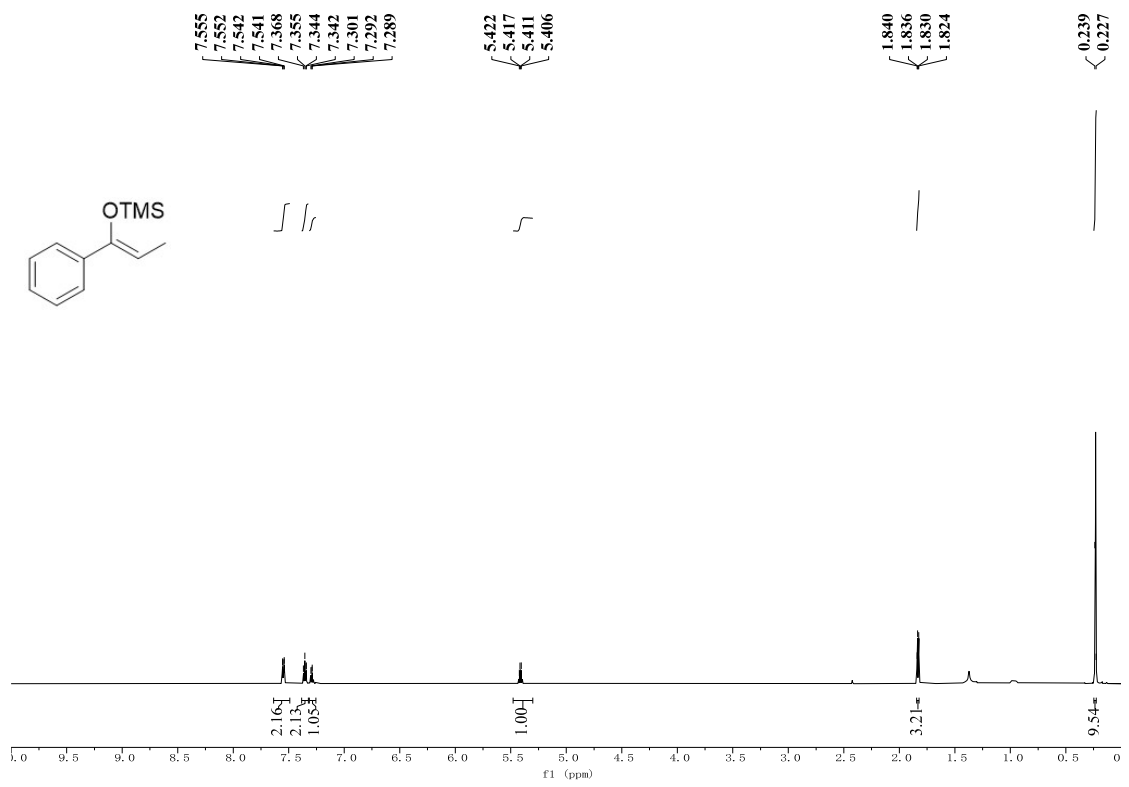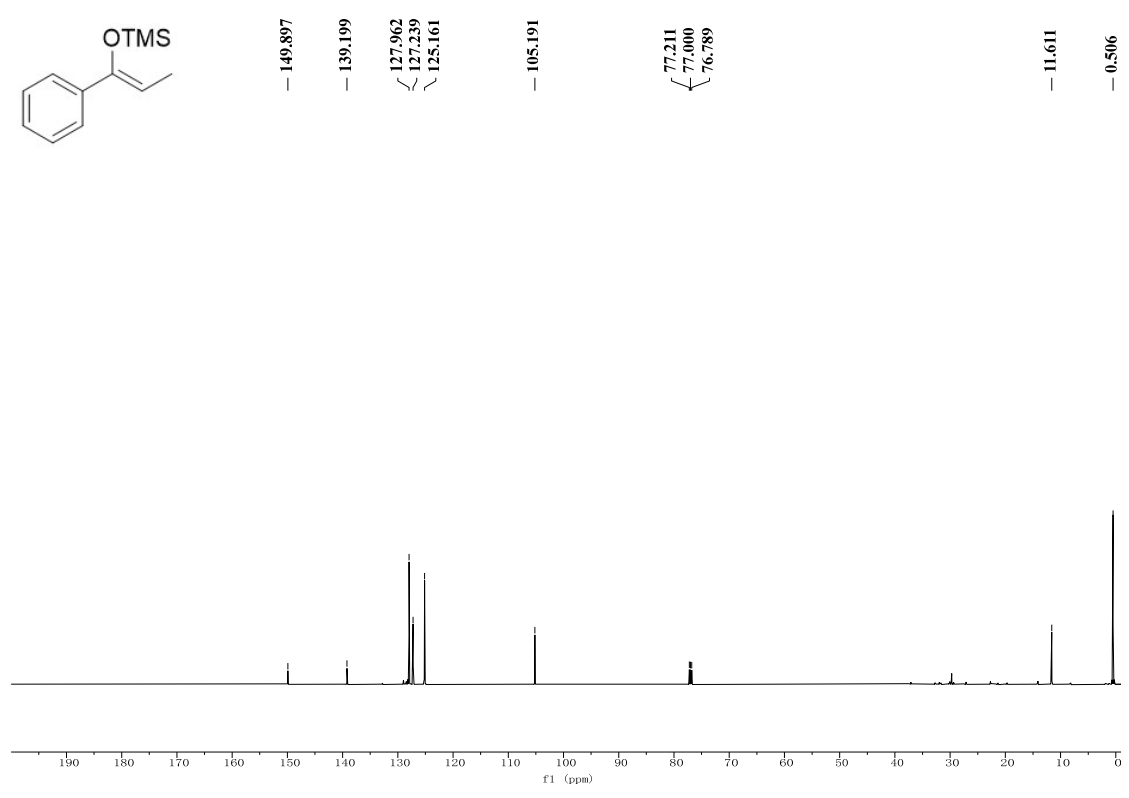



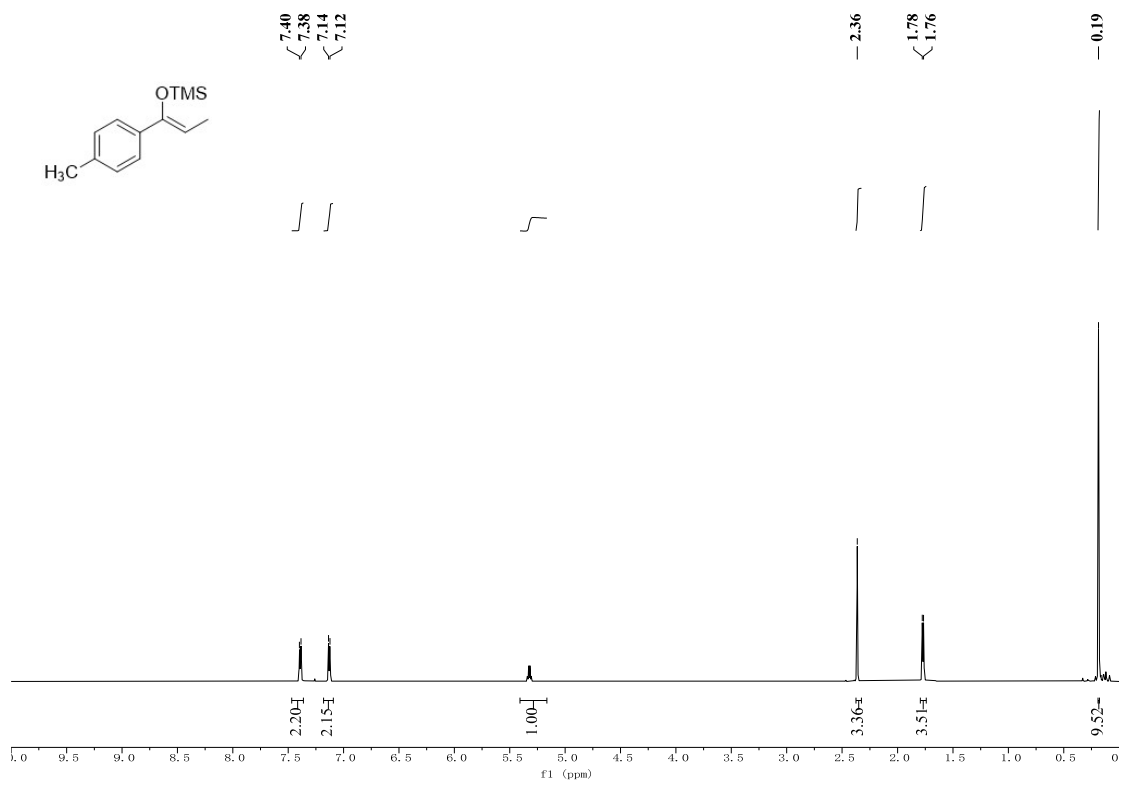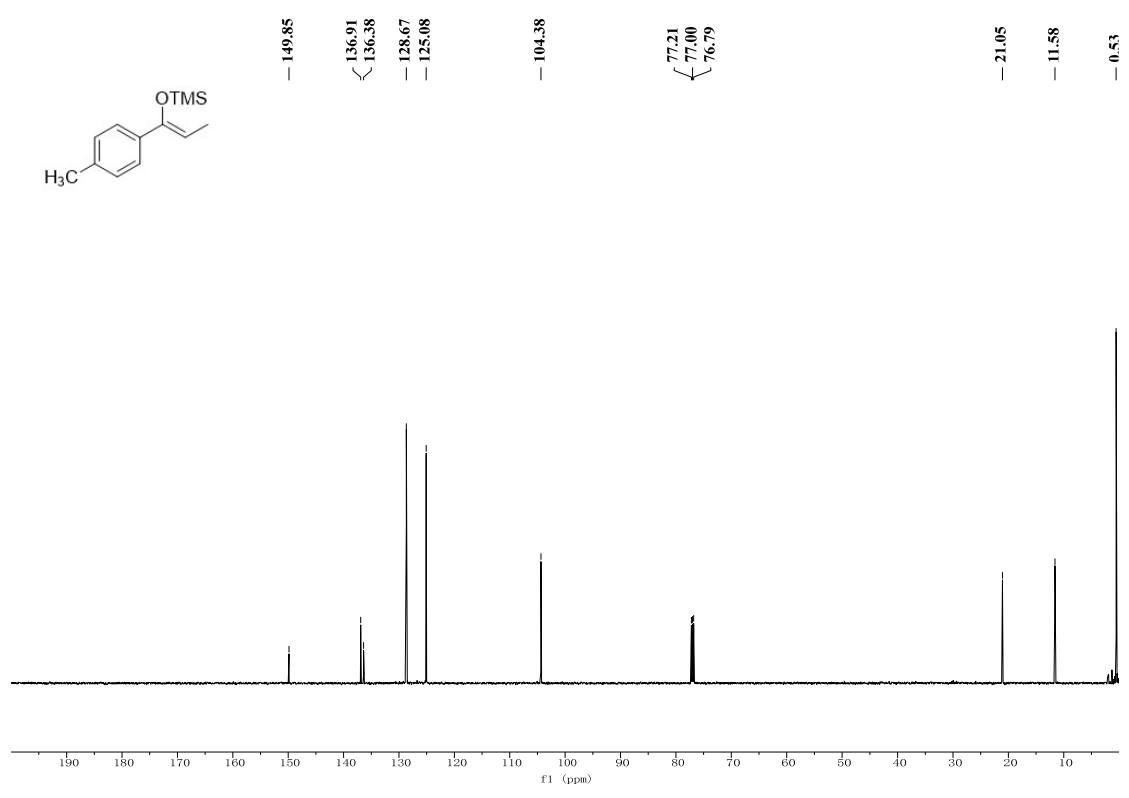

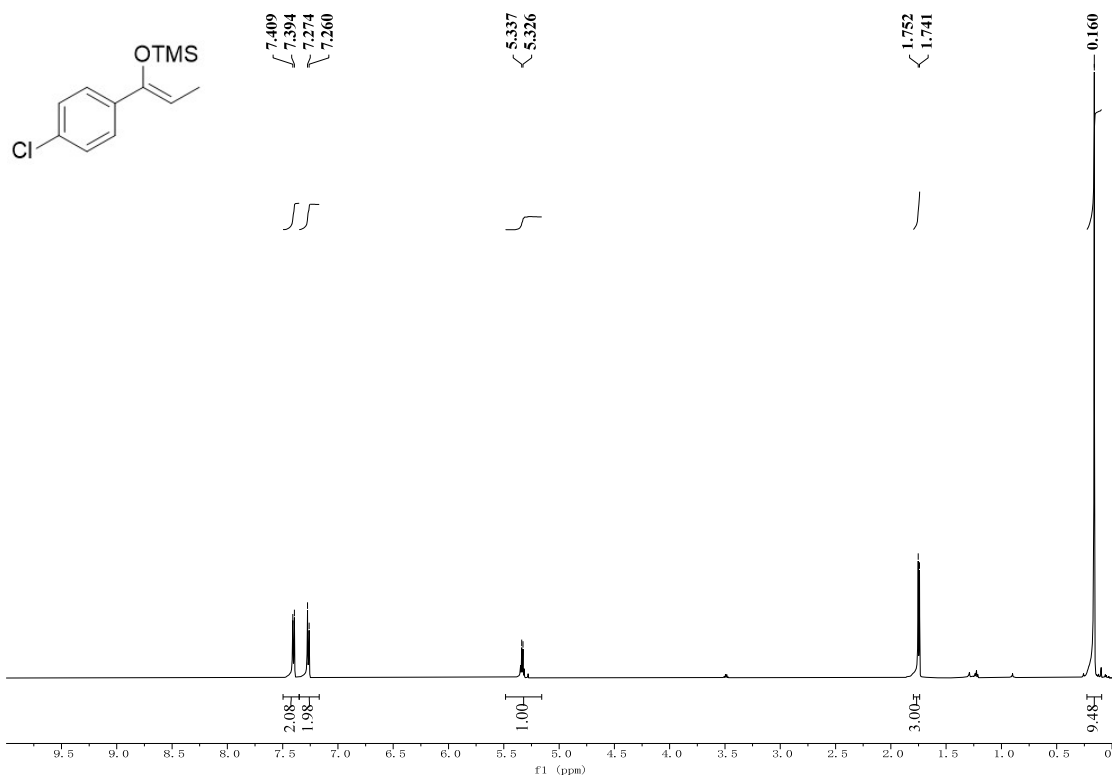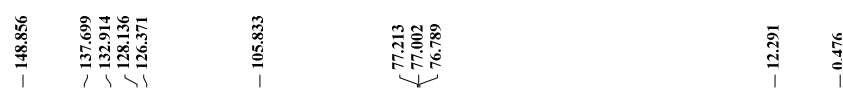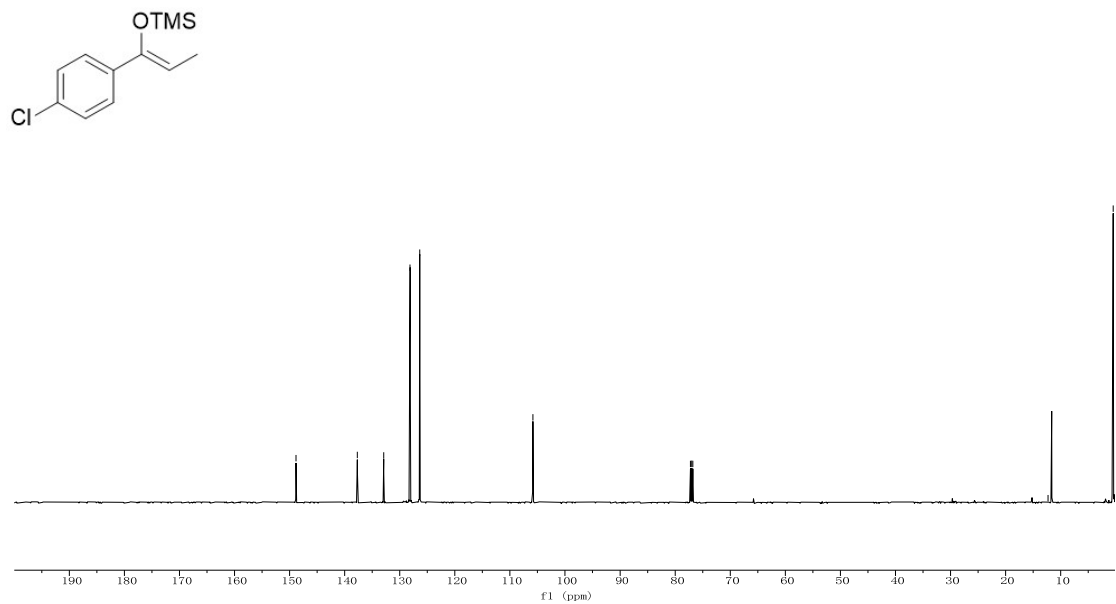

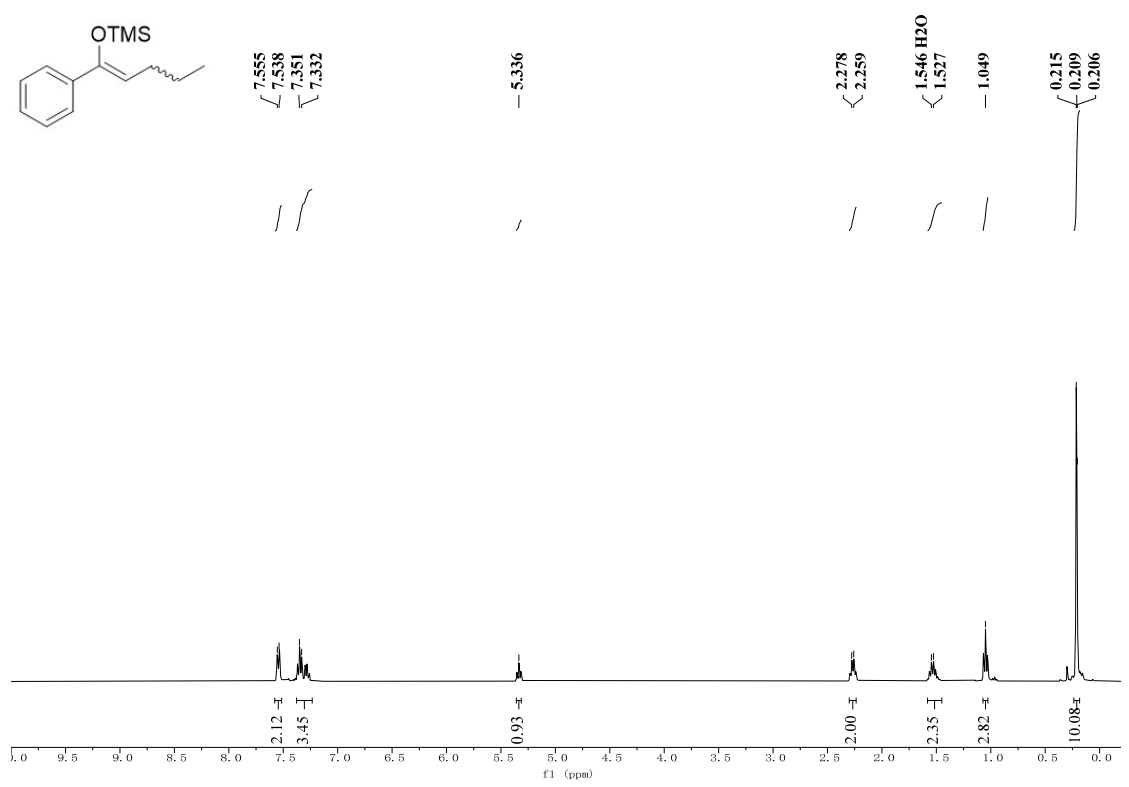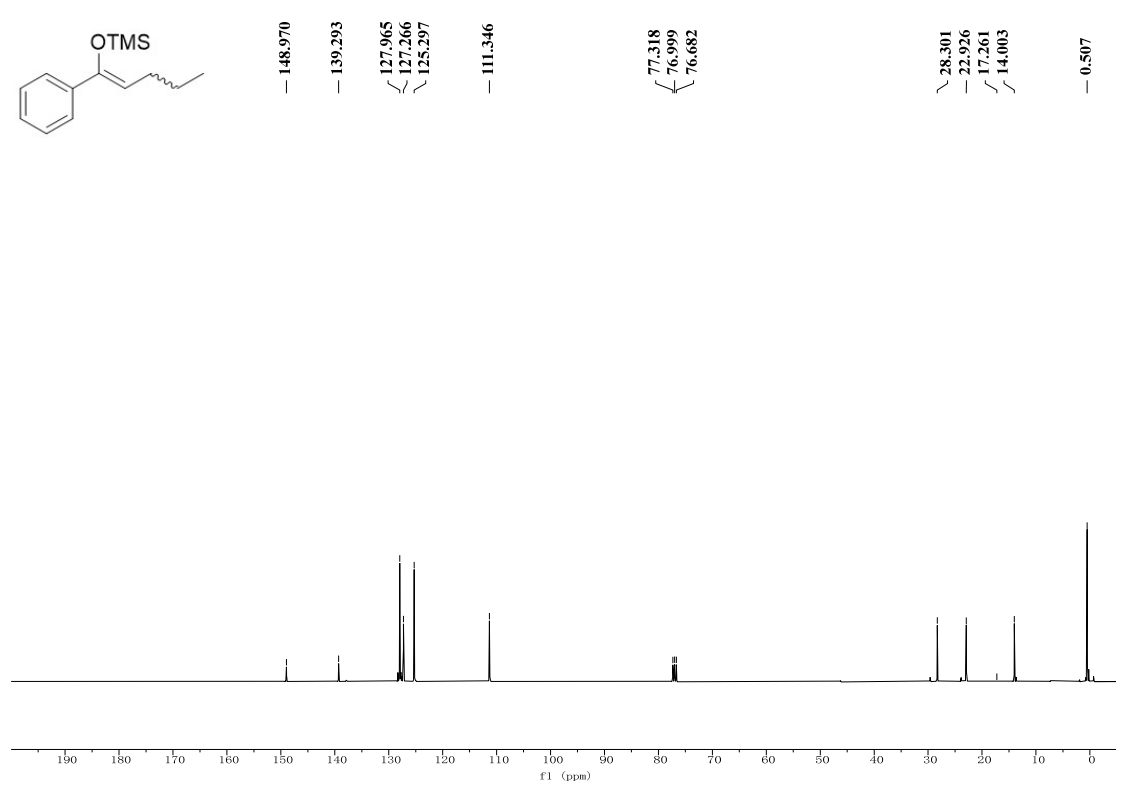

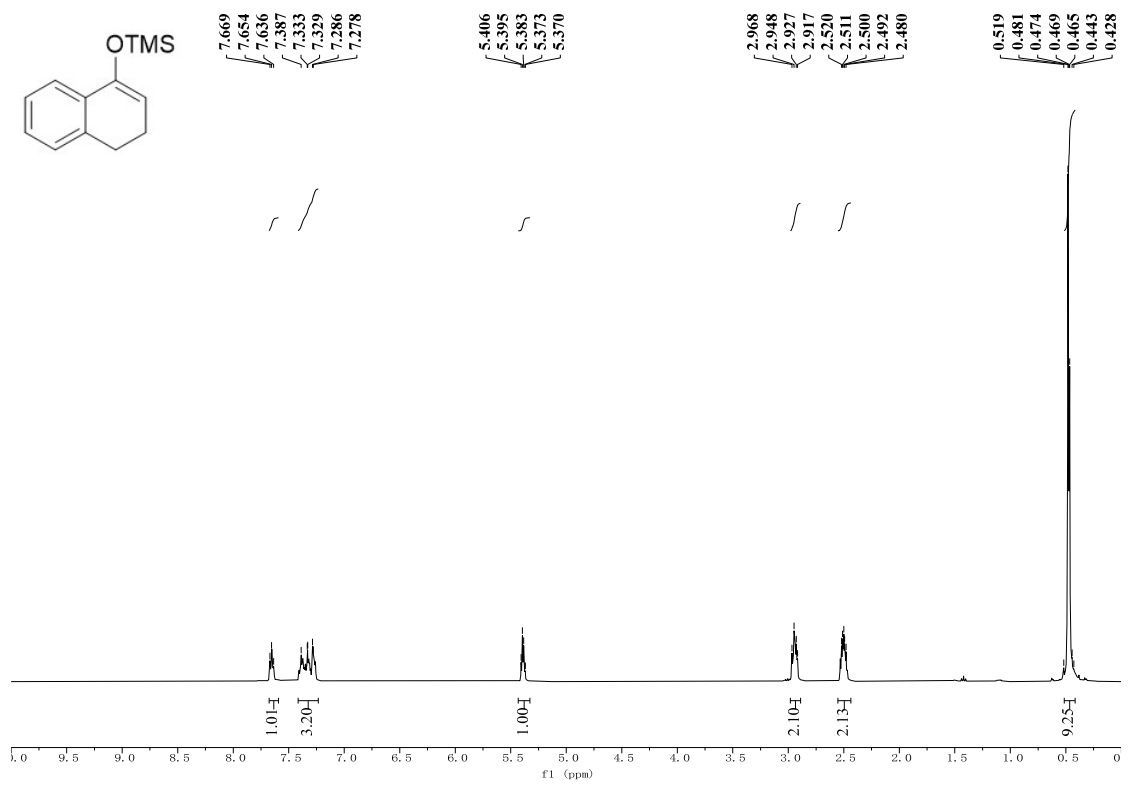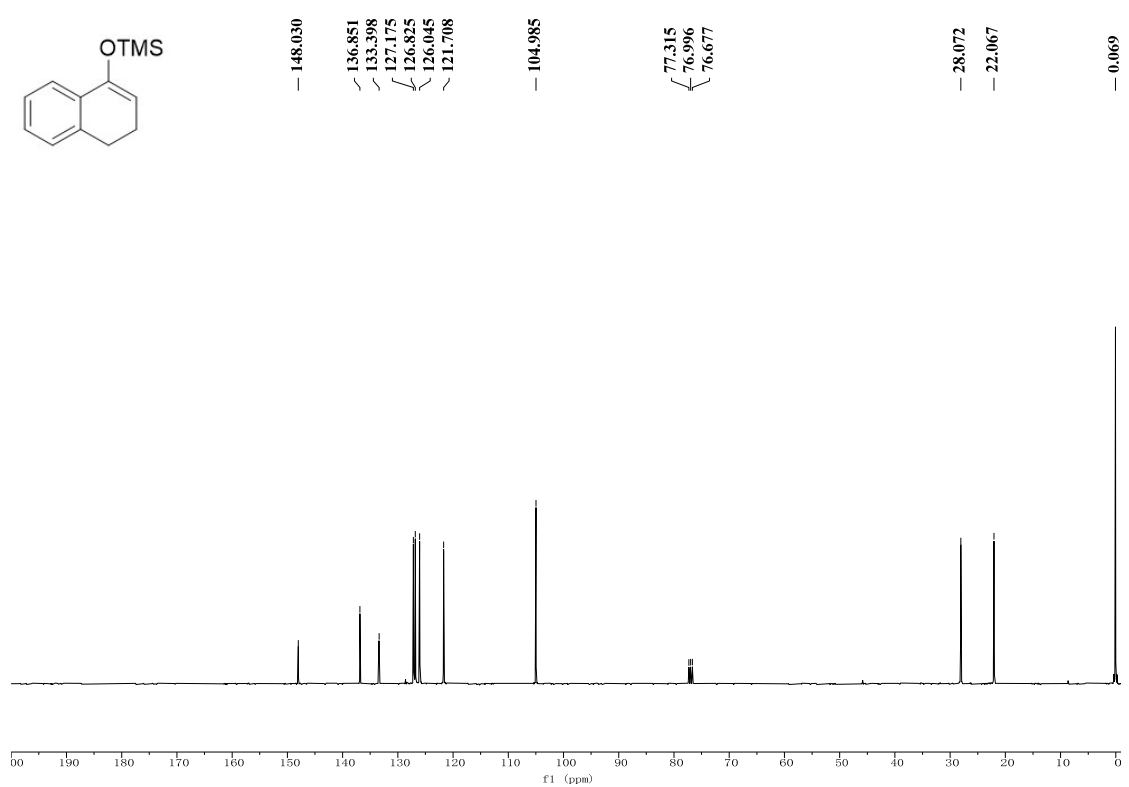

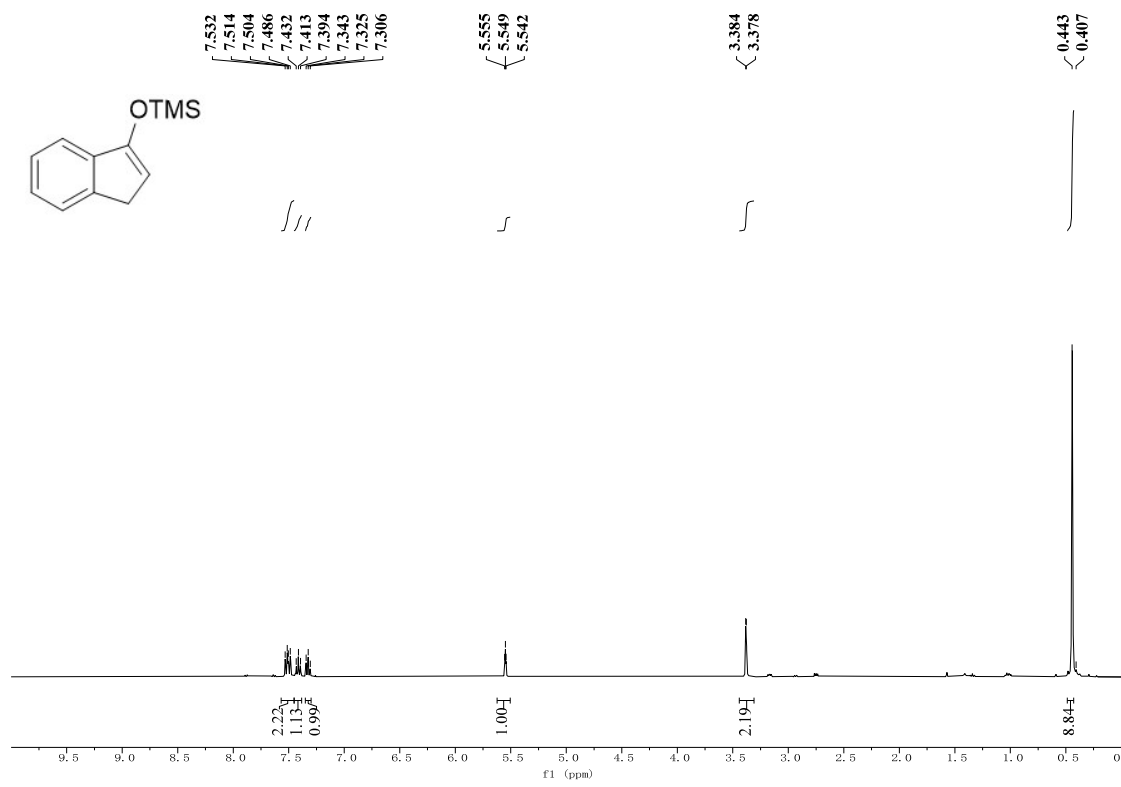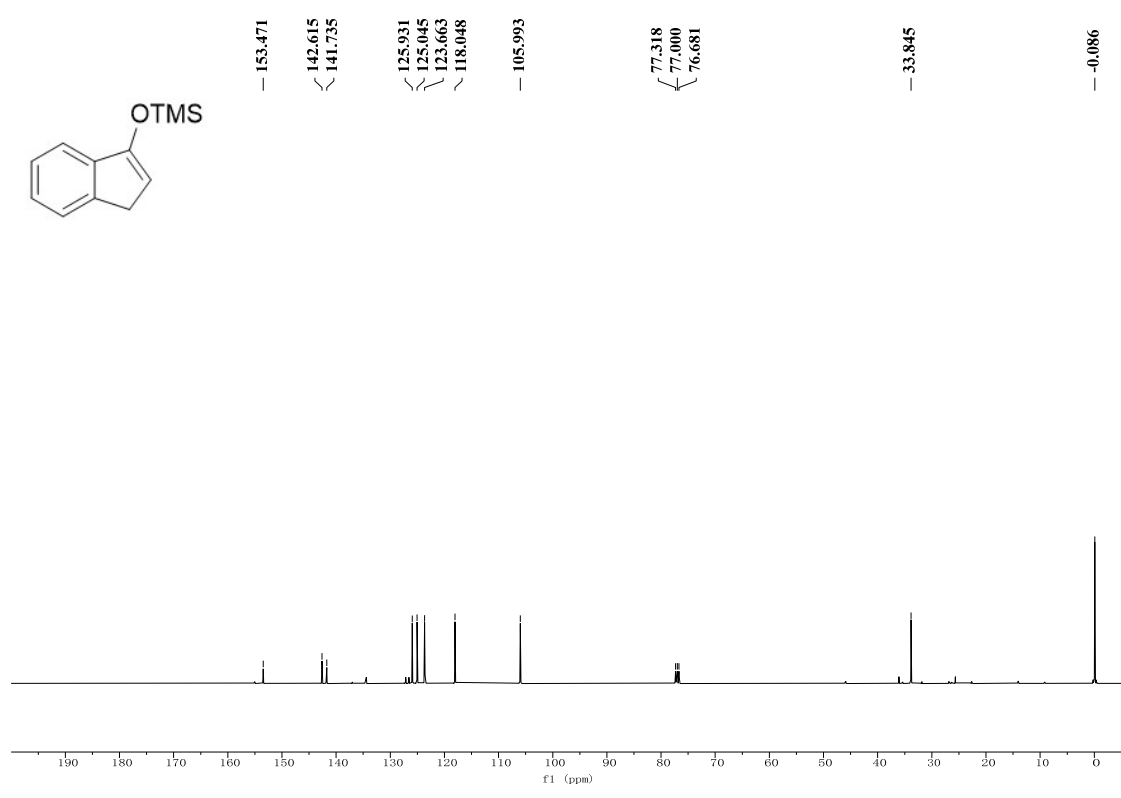

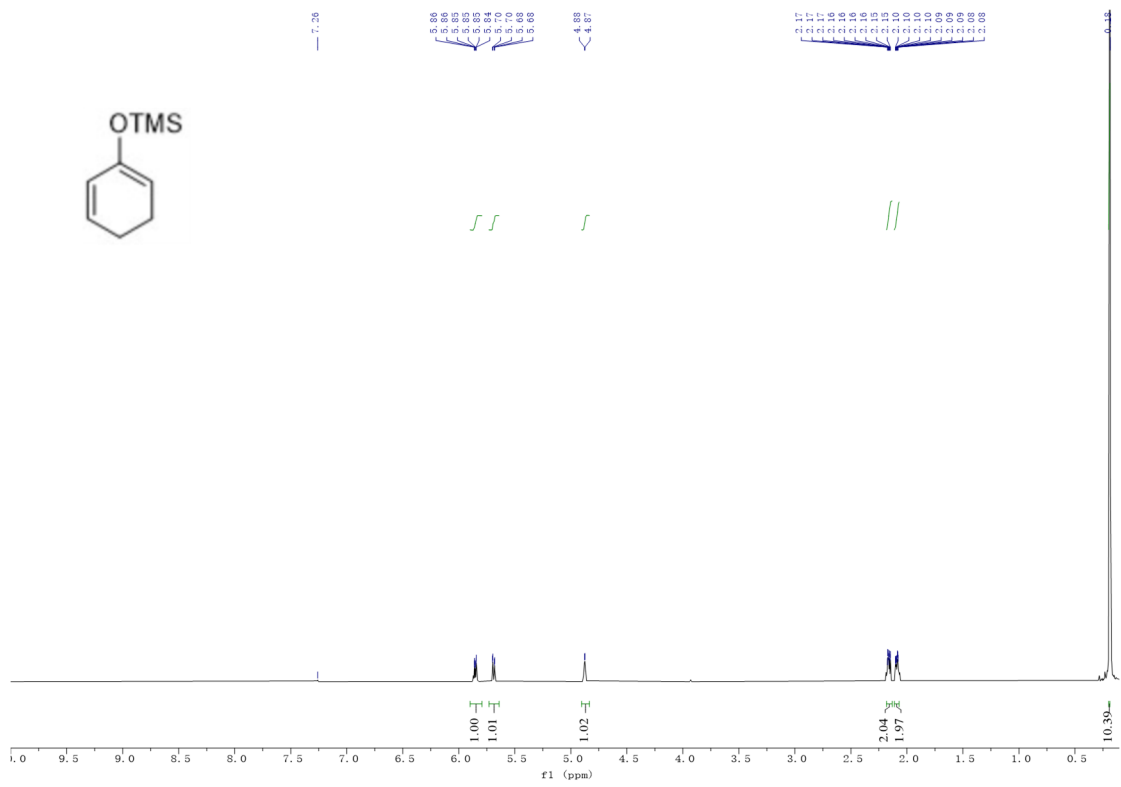

148.044 128.789 126.389 102.315 77.319 77.000 76.682 22.554 21.692 1.866 0.087

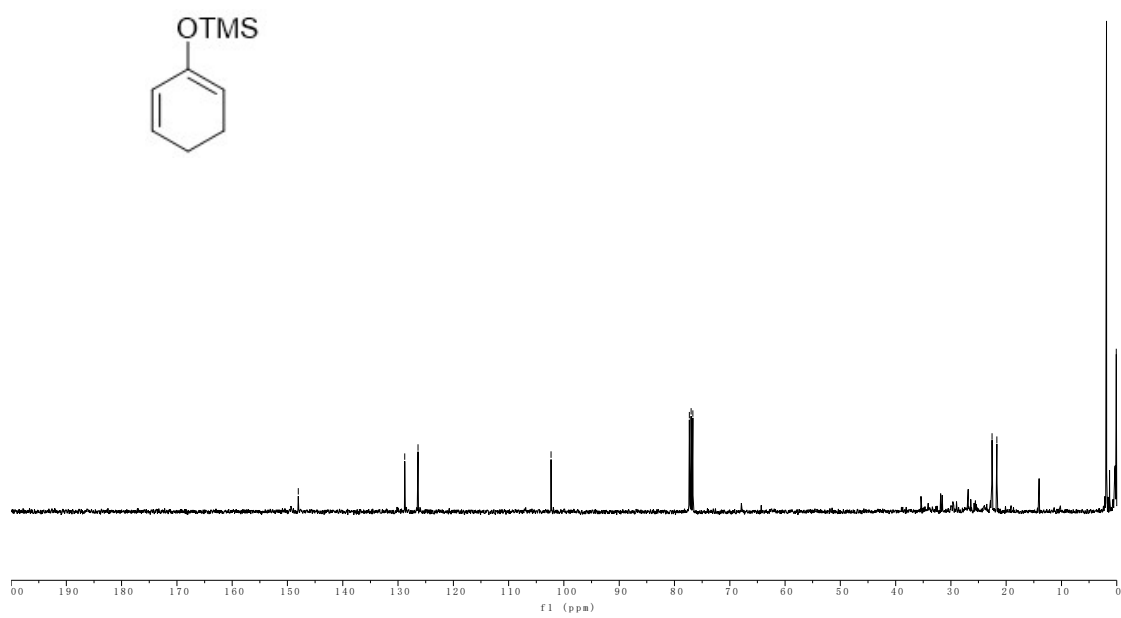

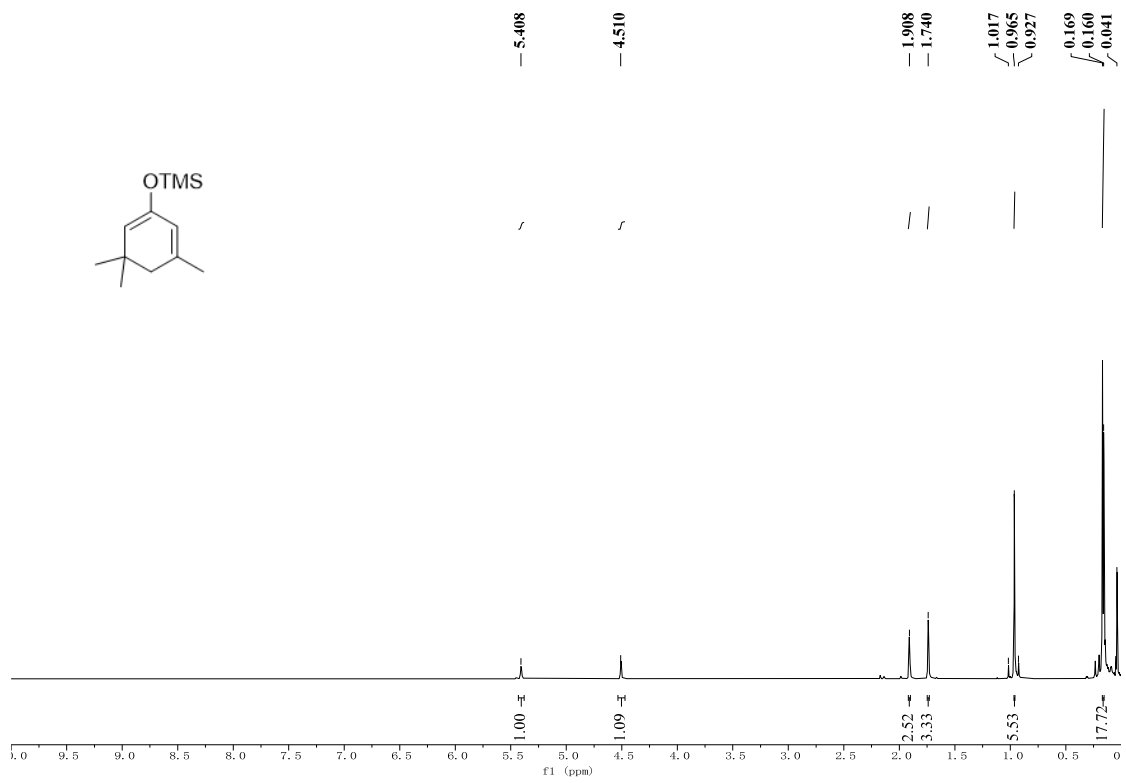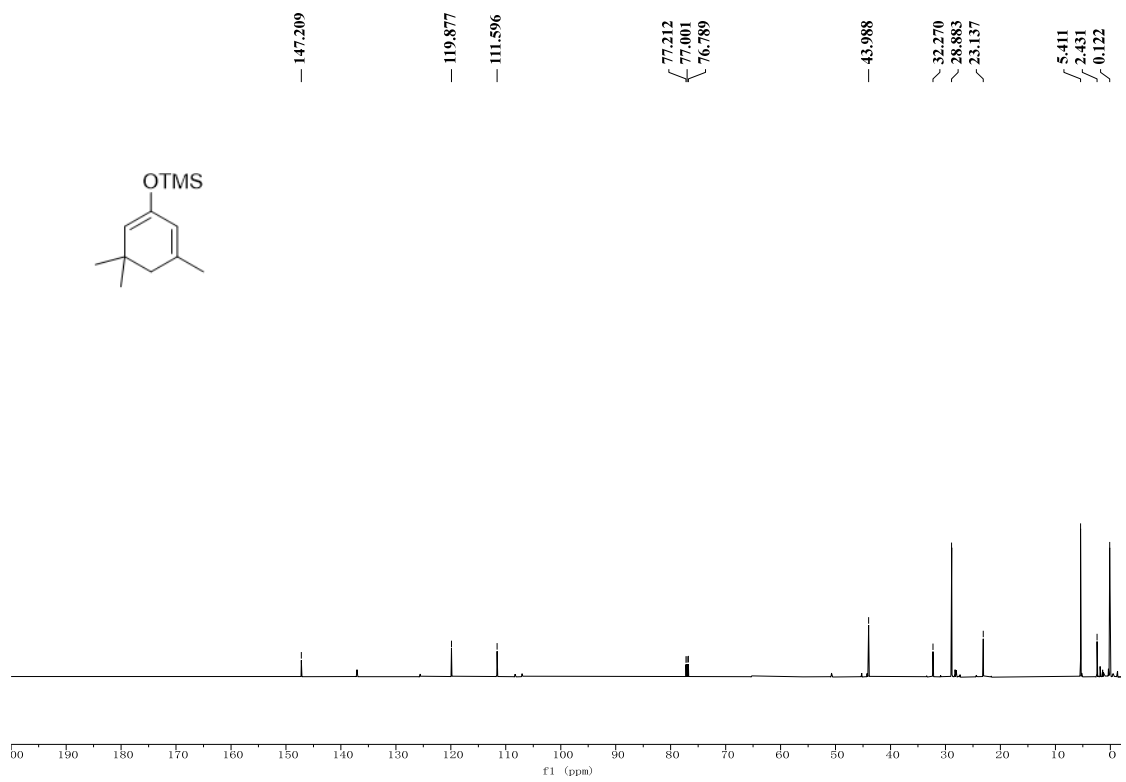

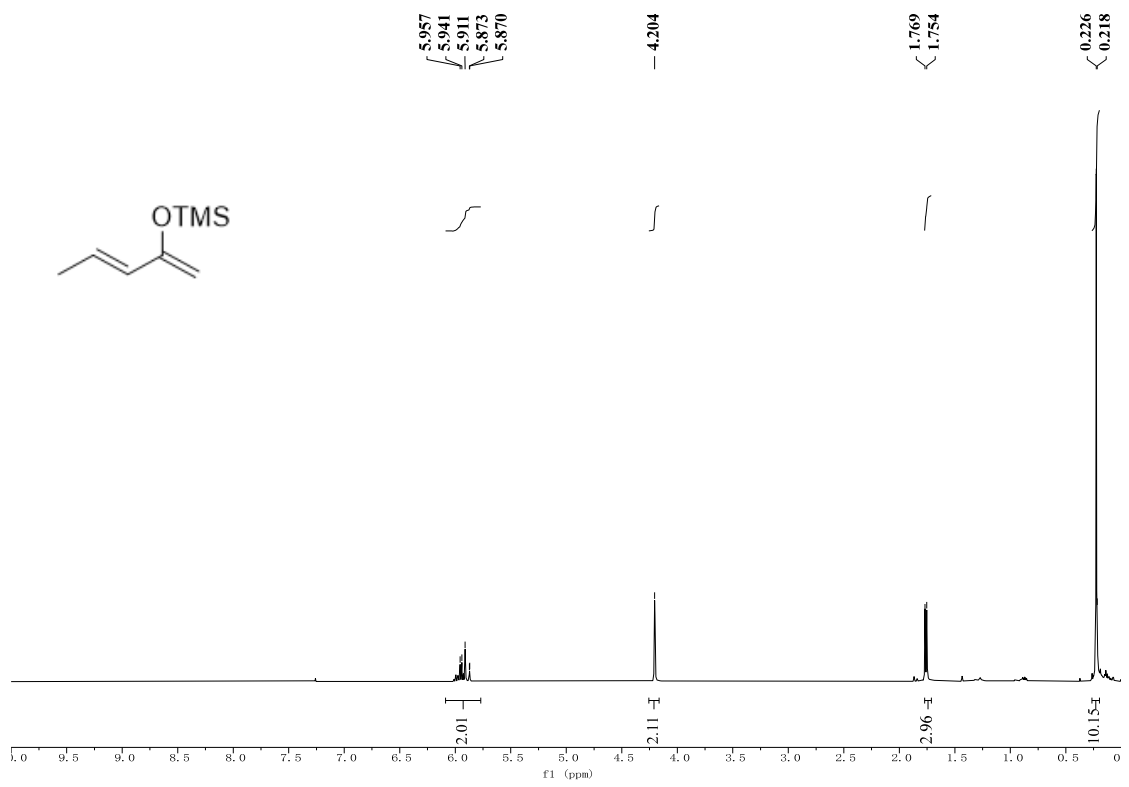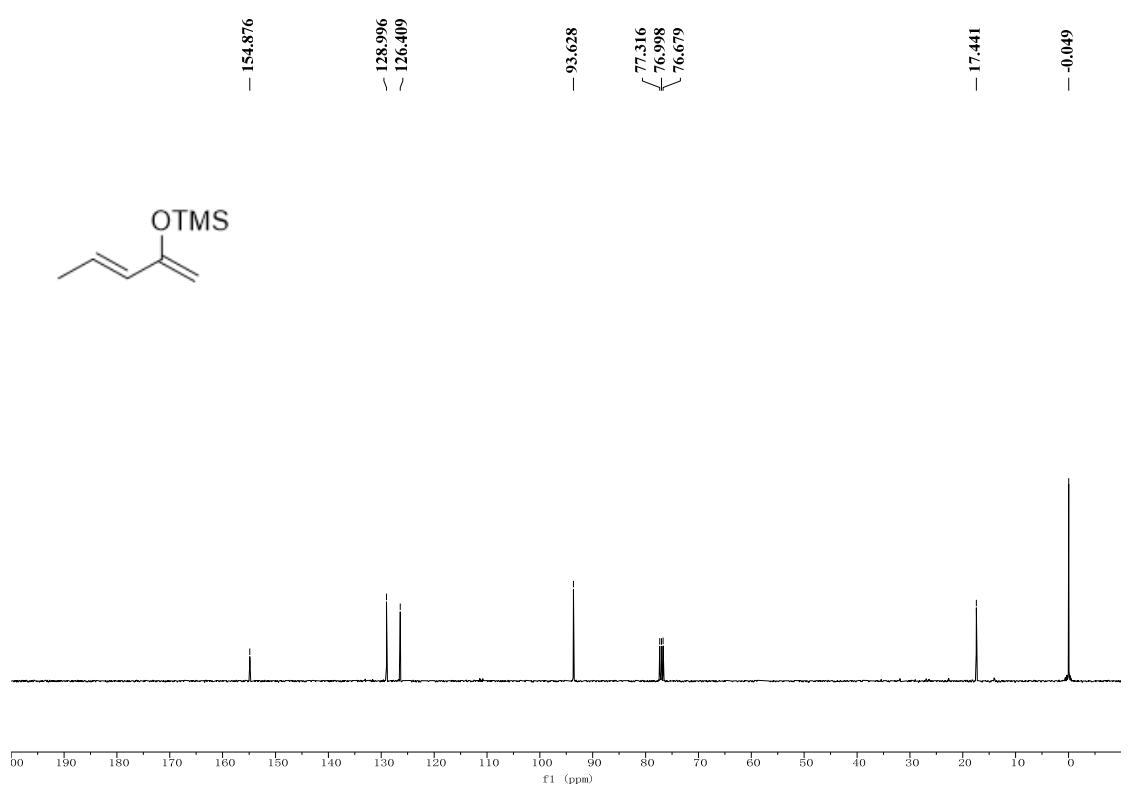



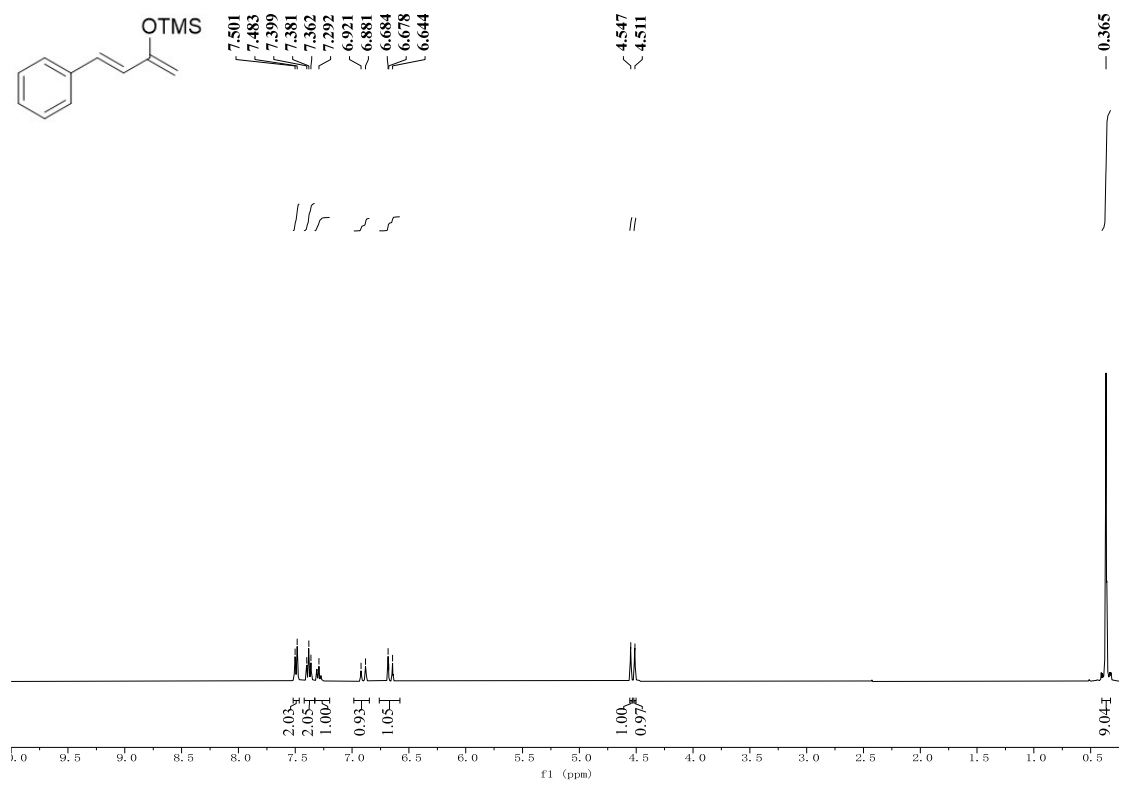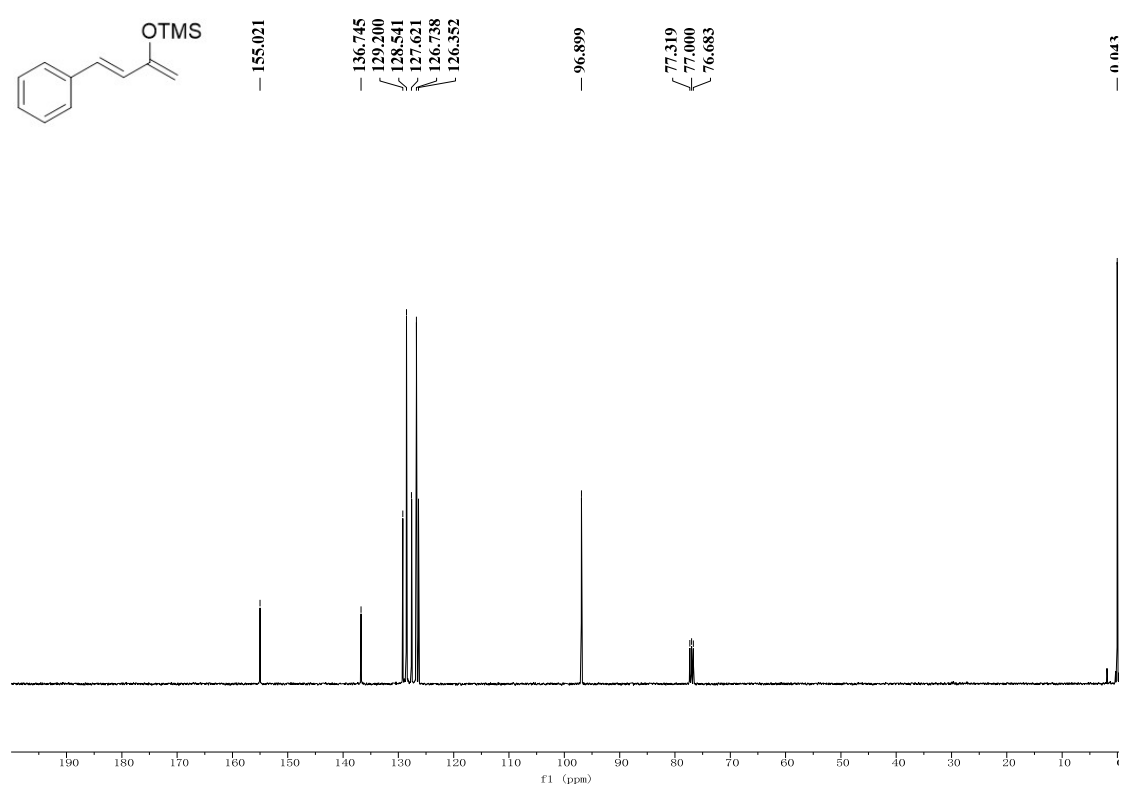

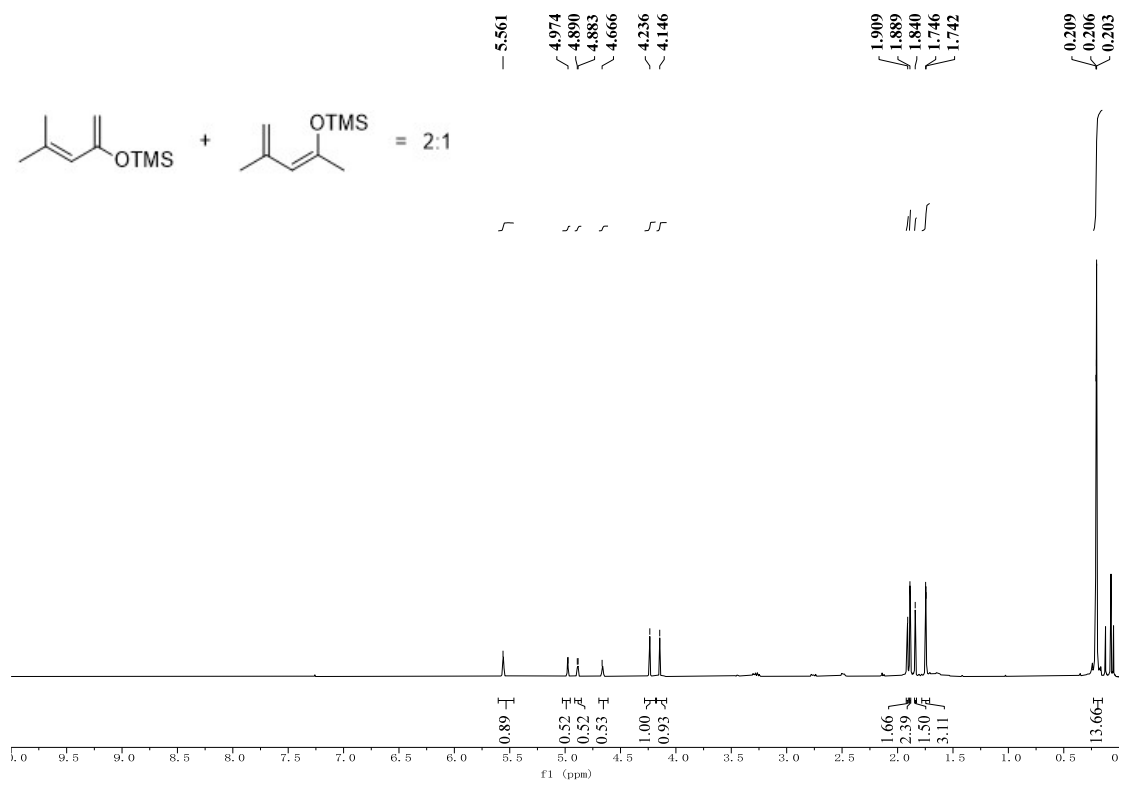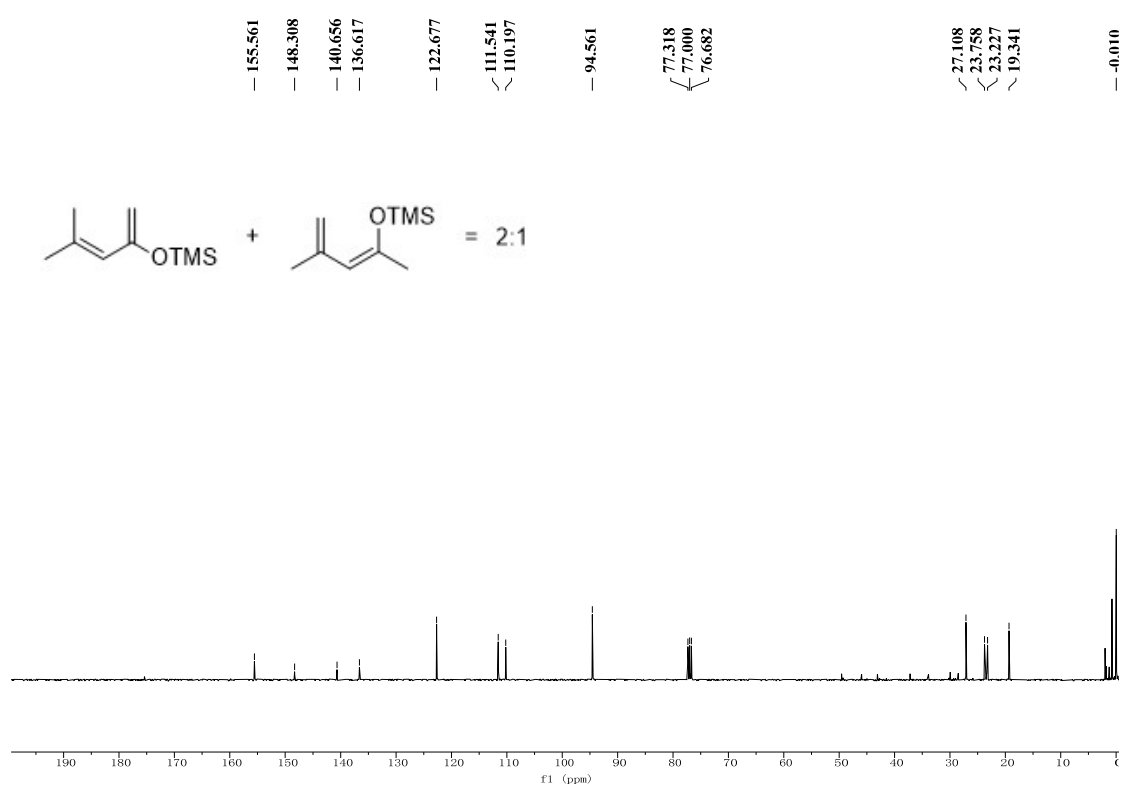

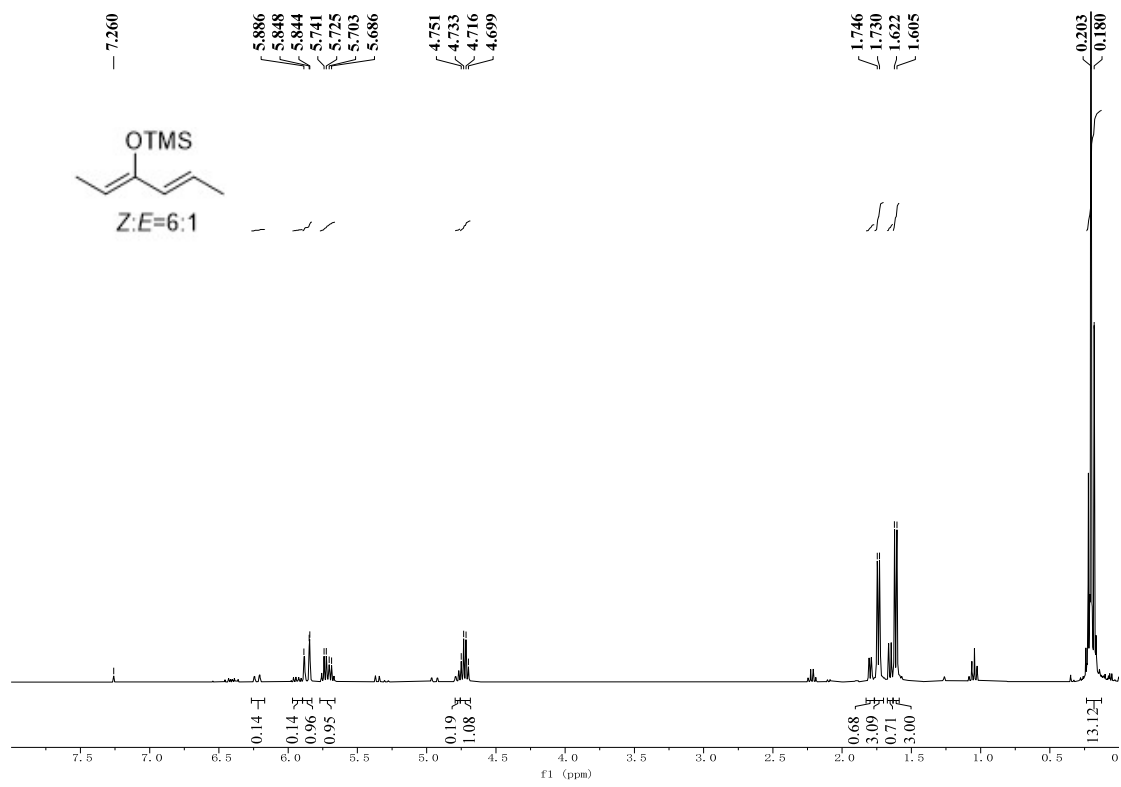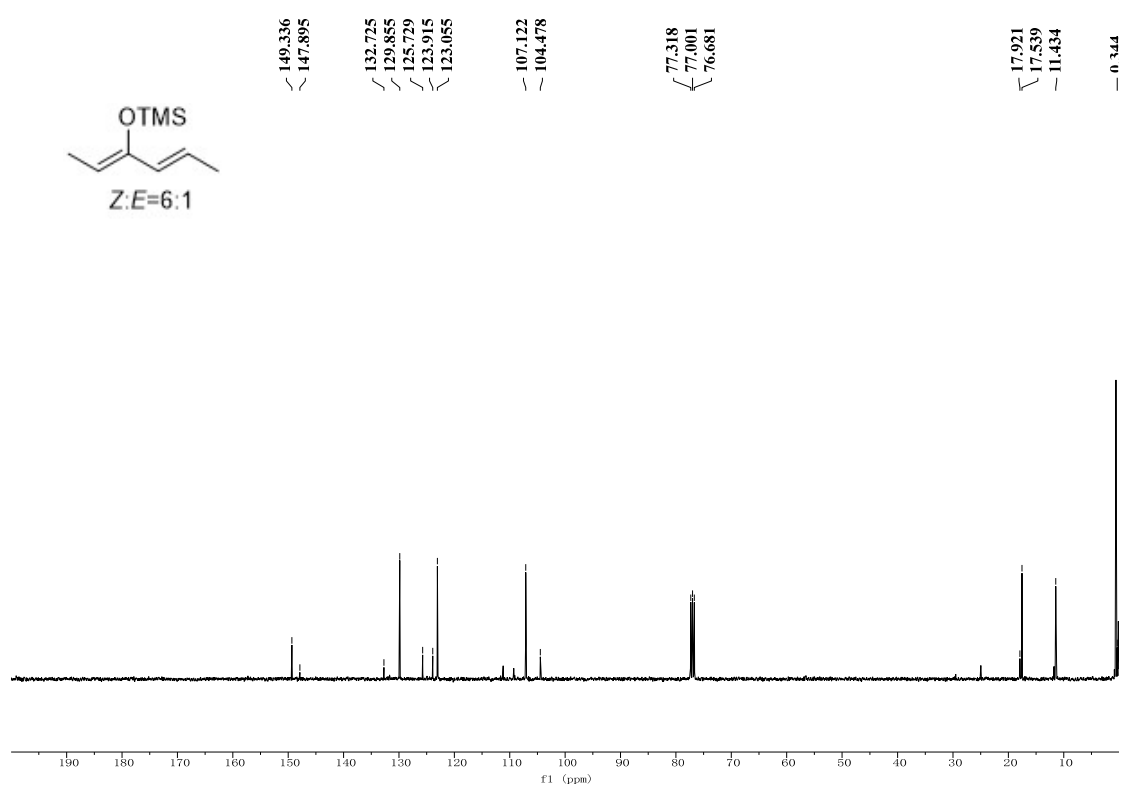

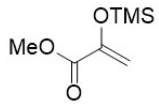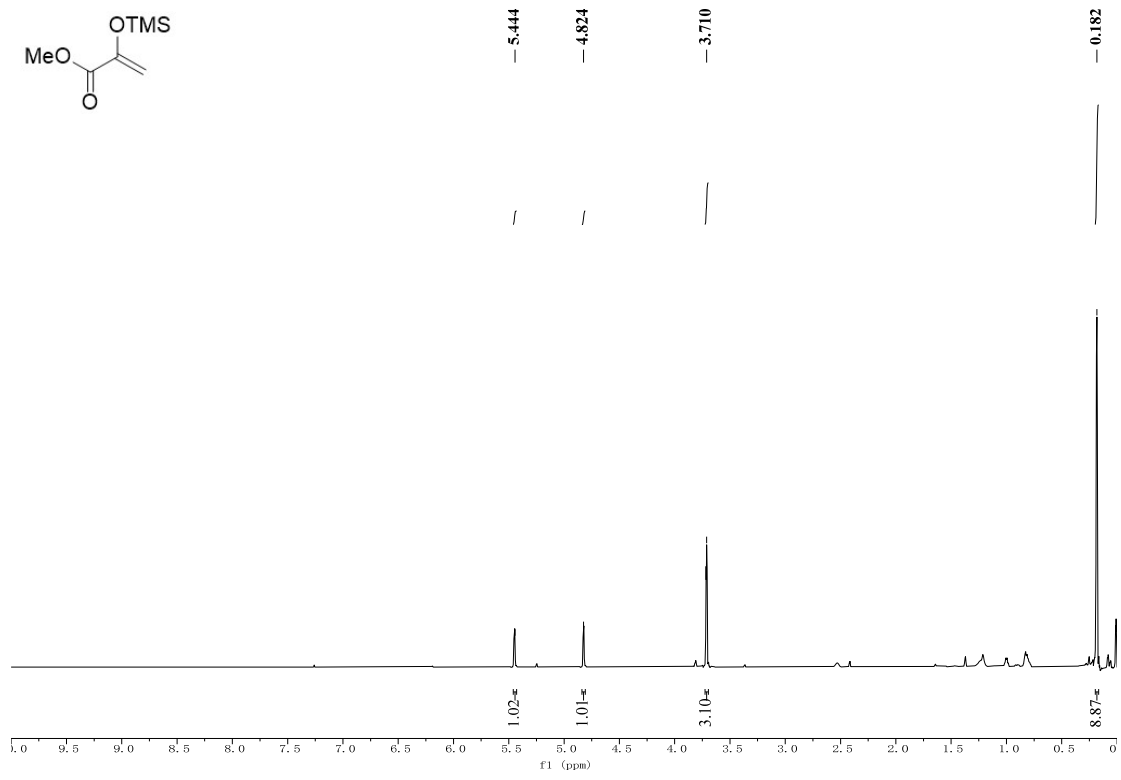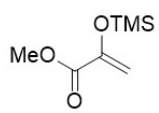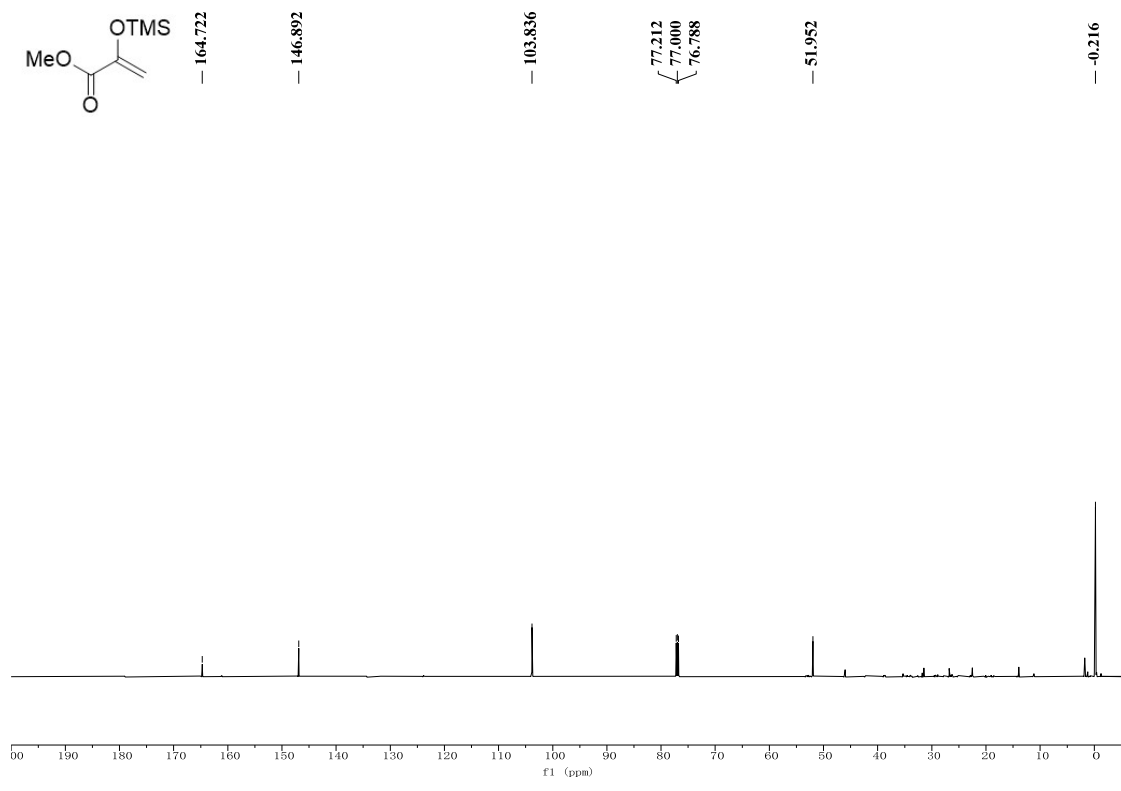

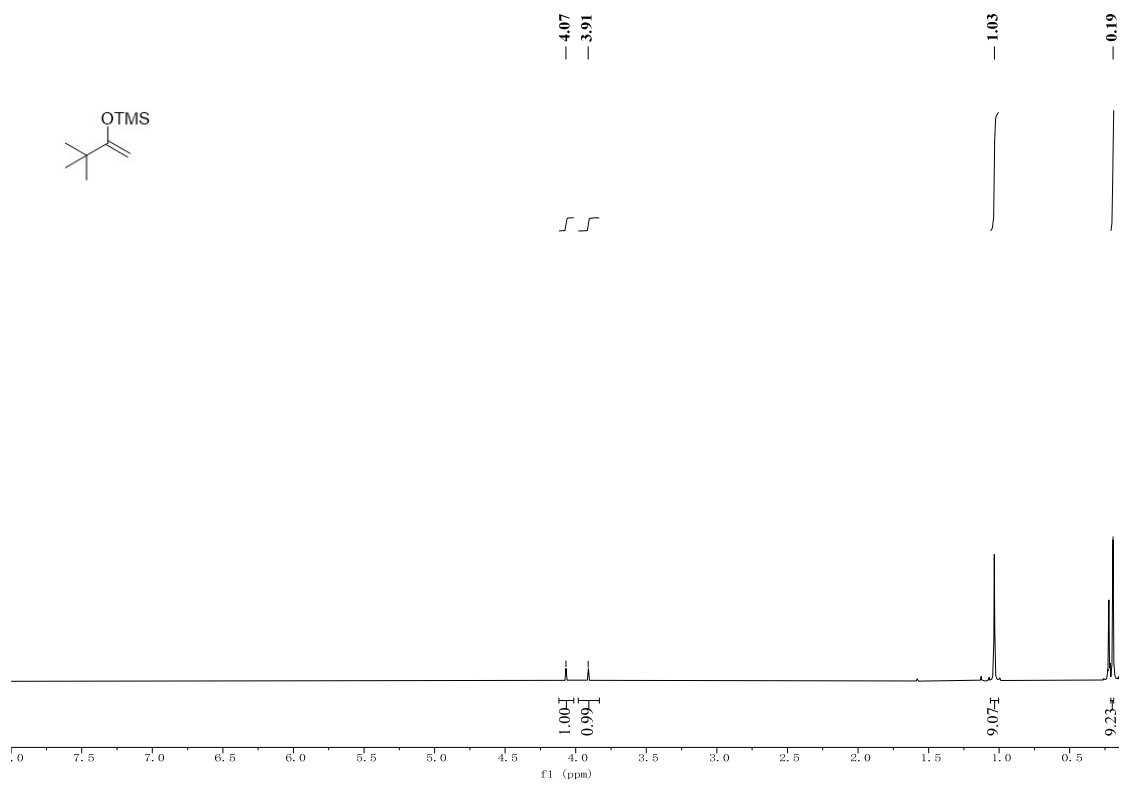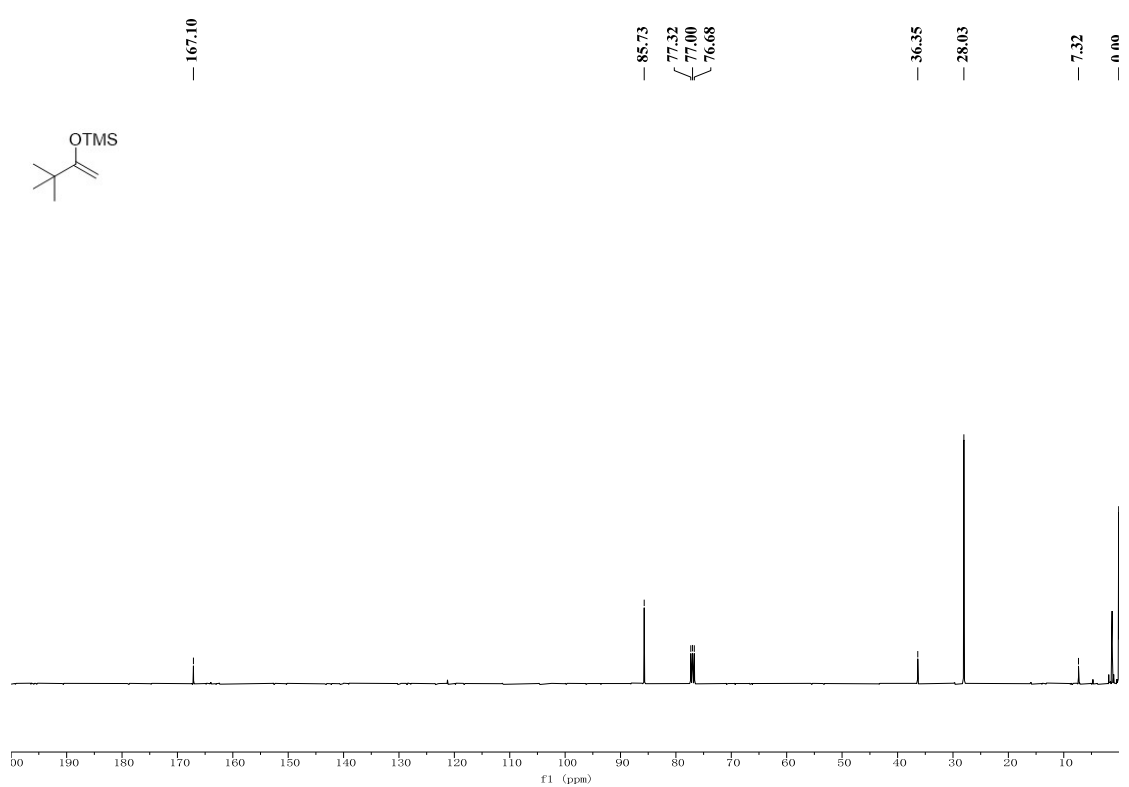

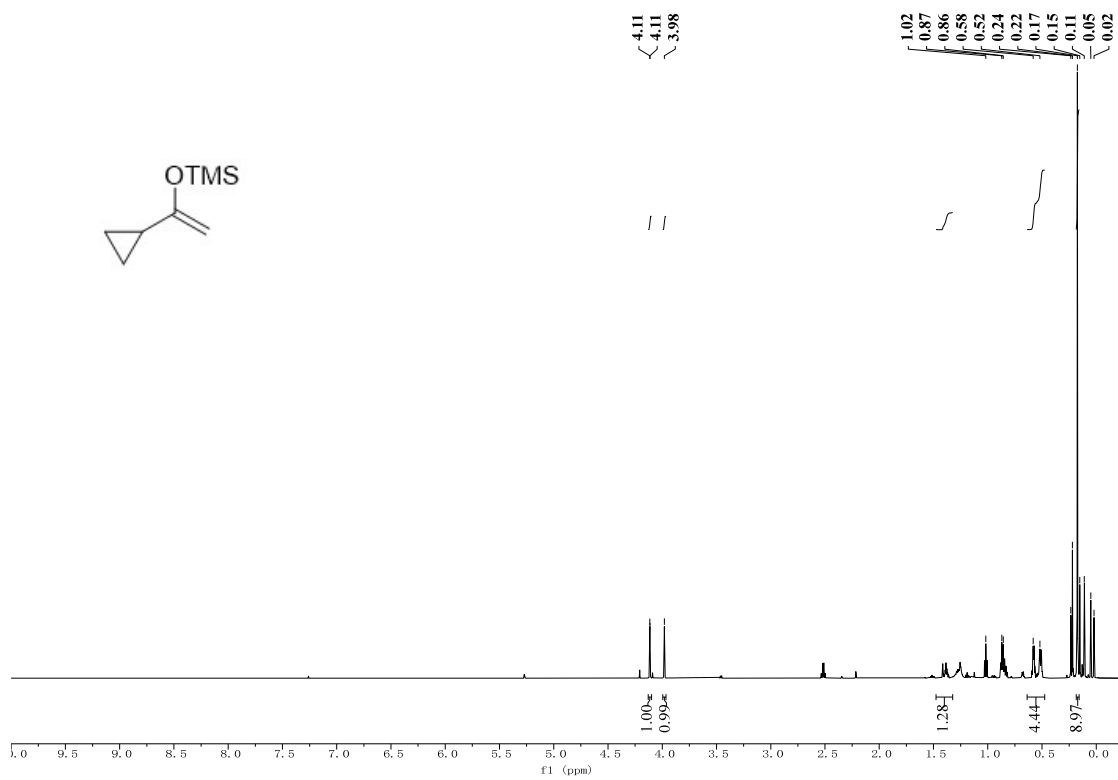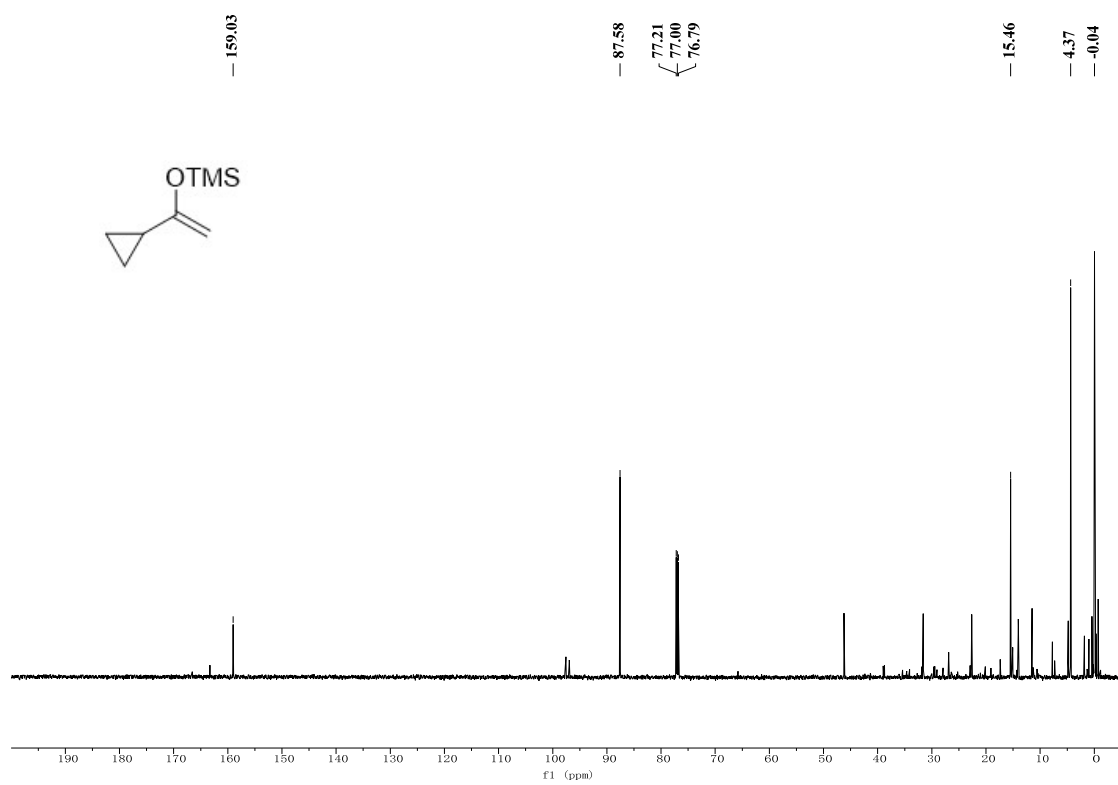

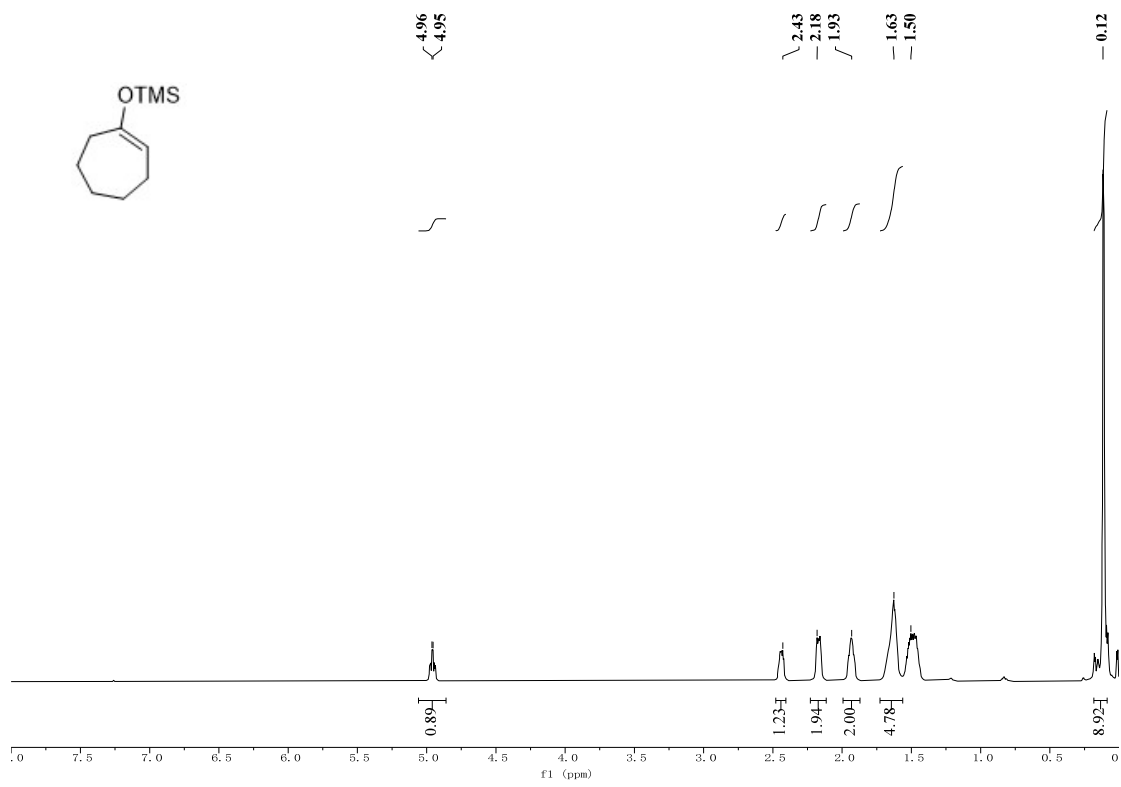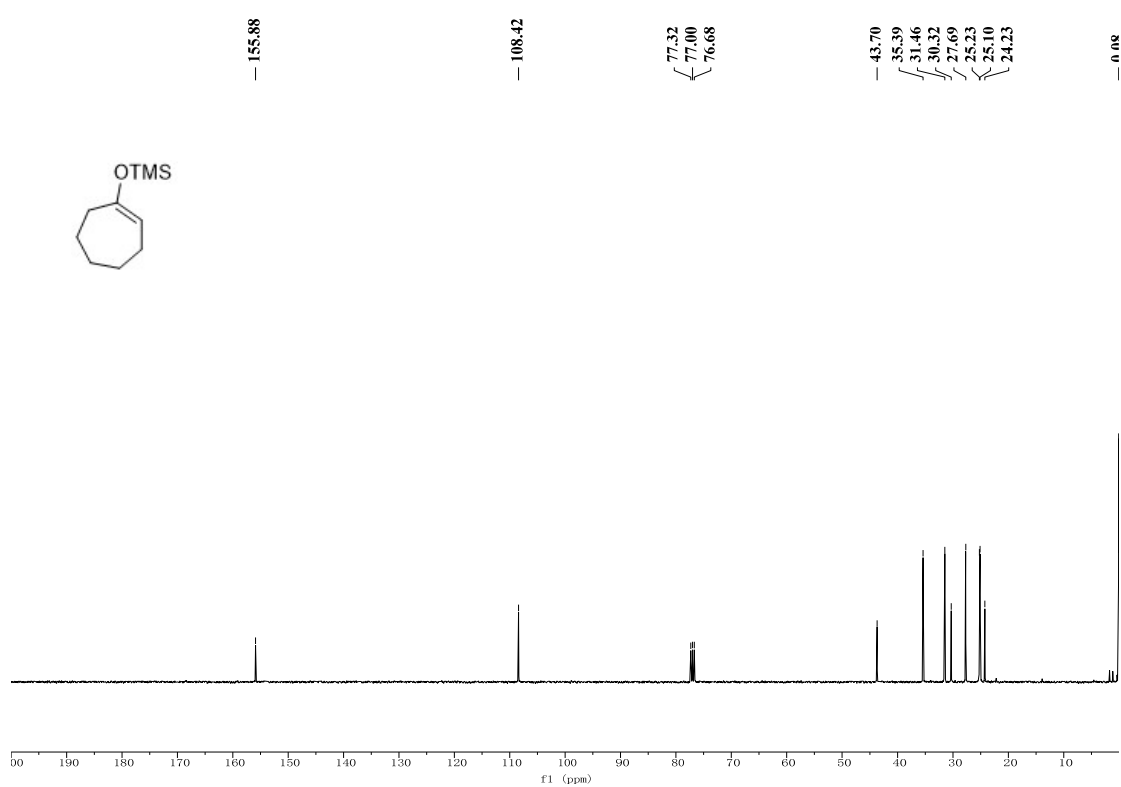

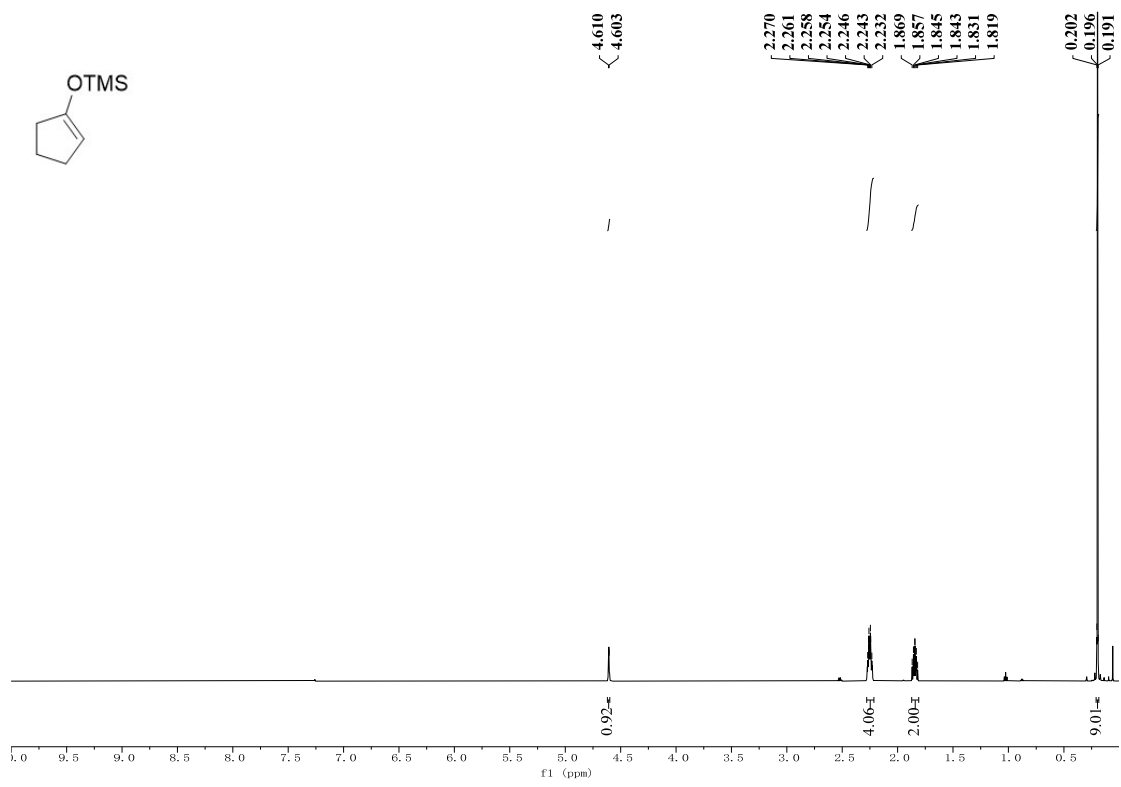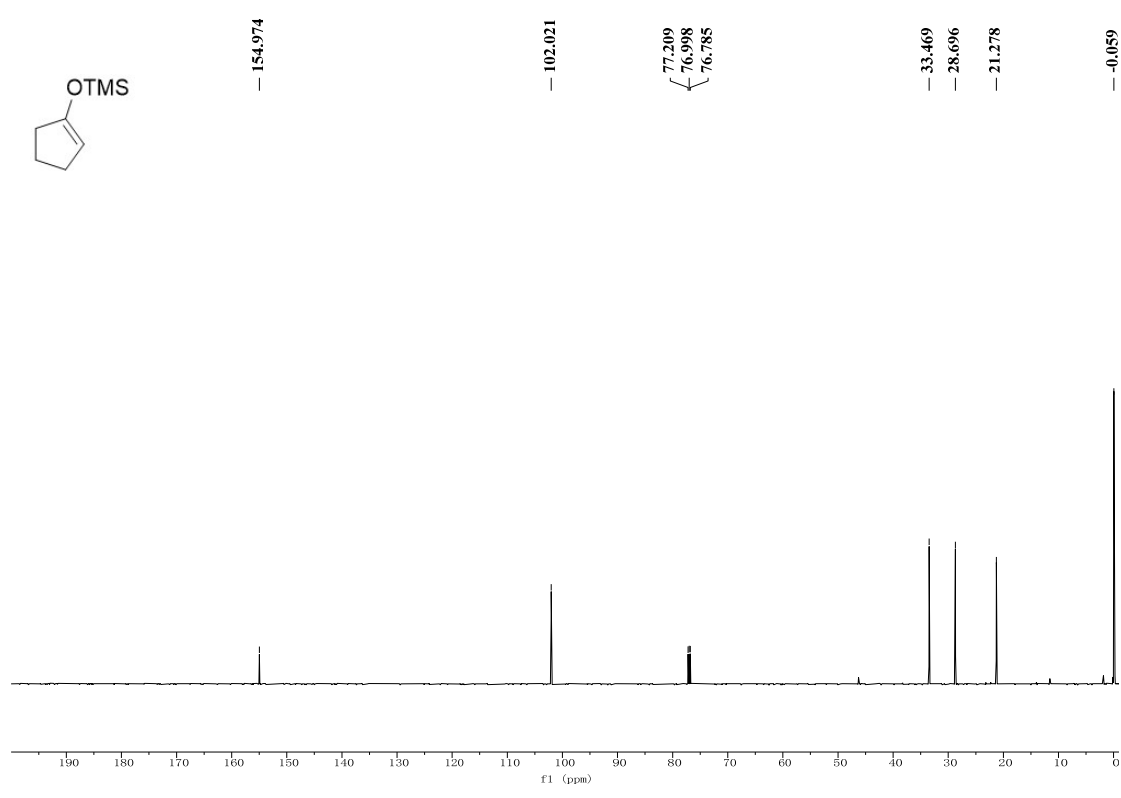



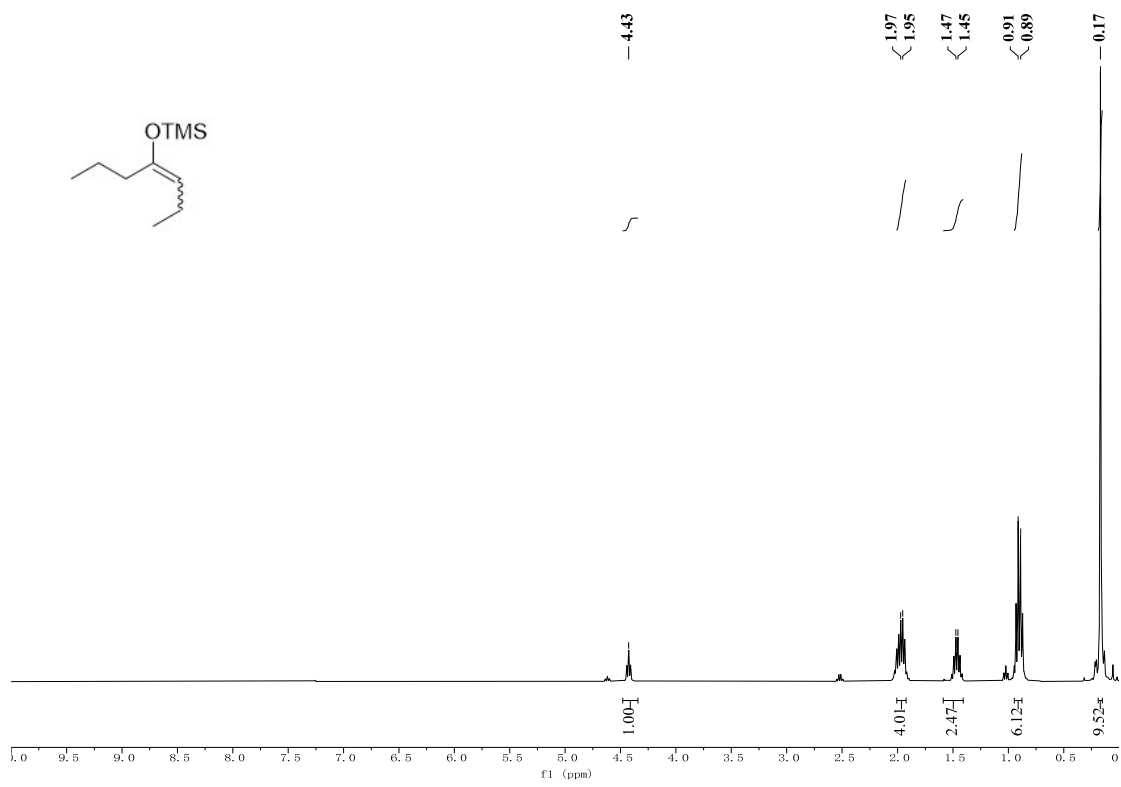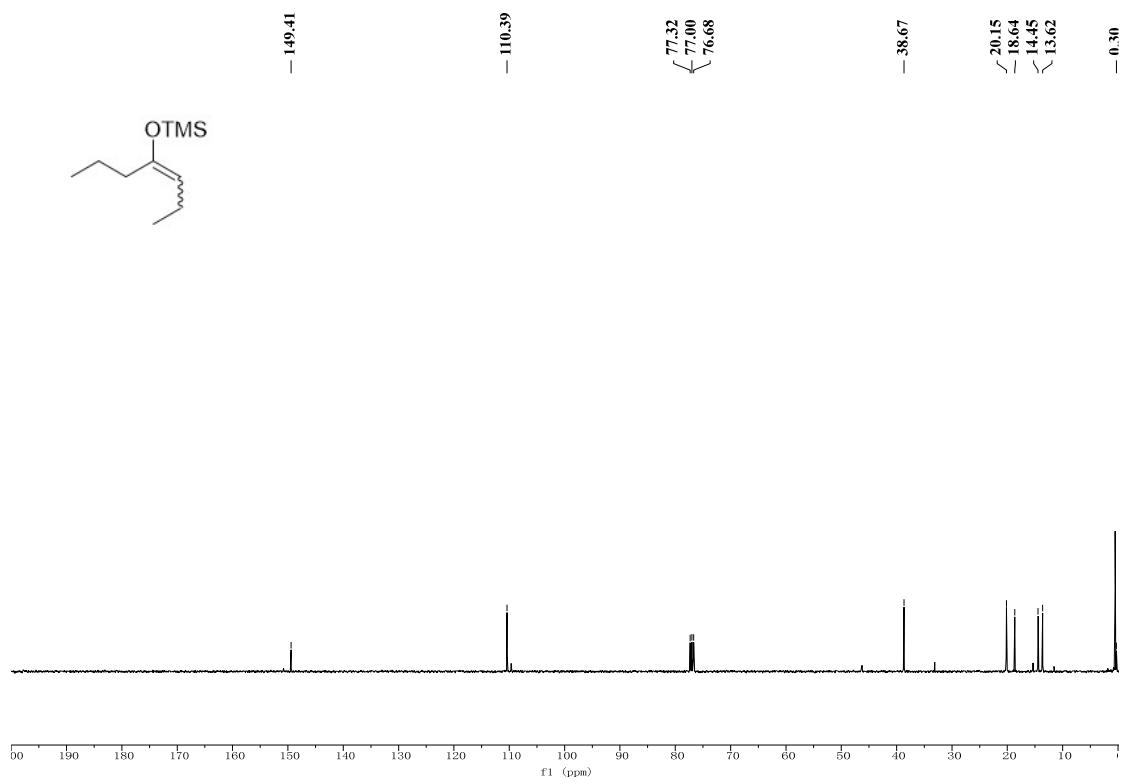

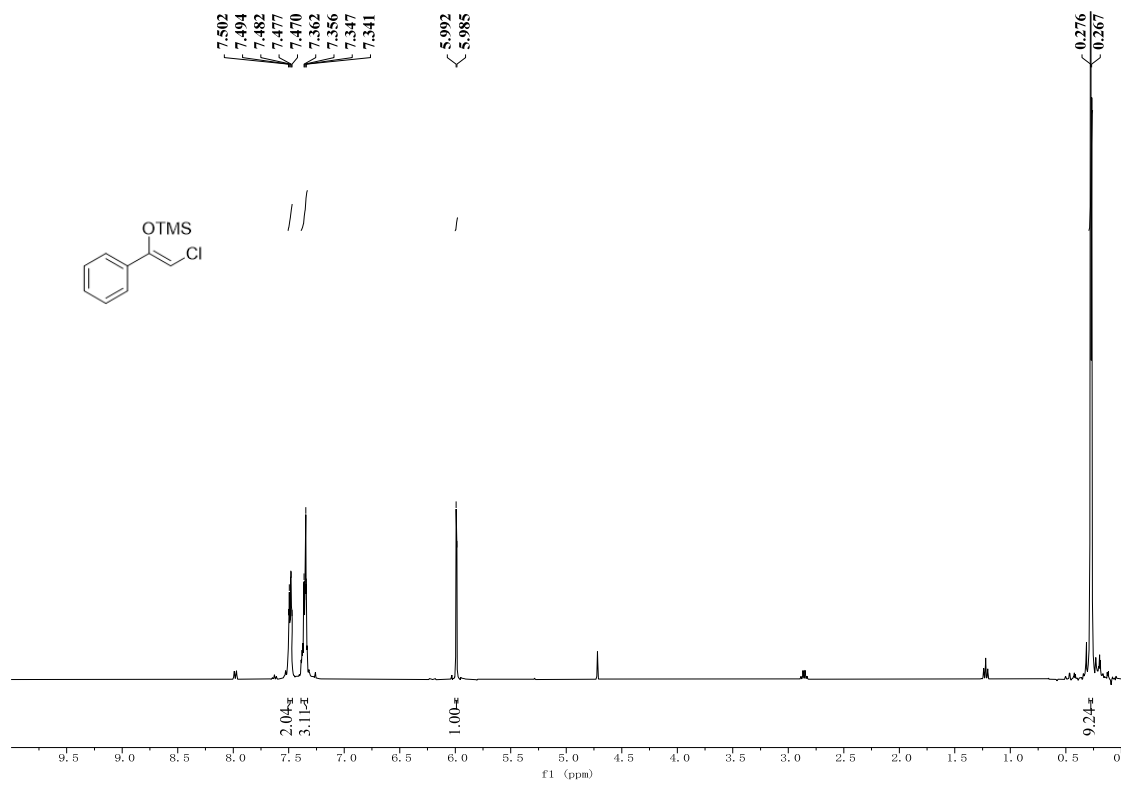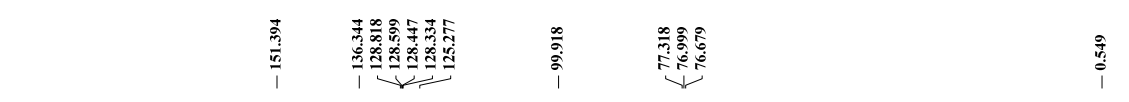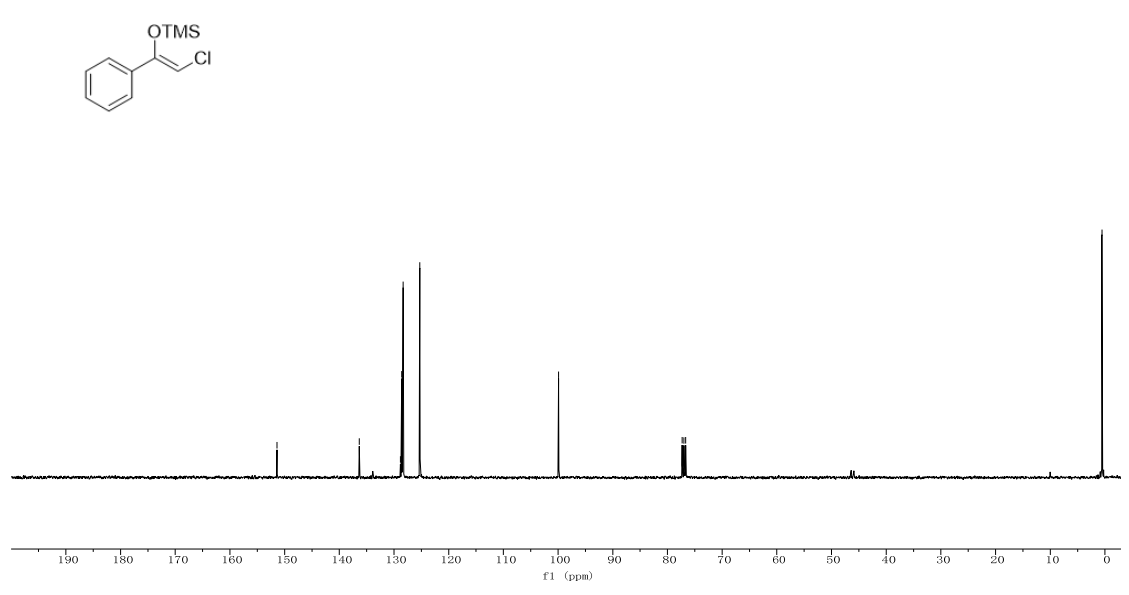

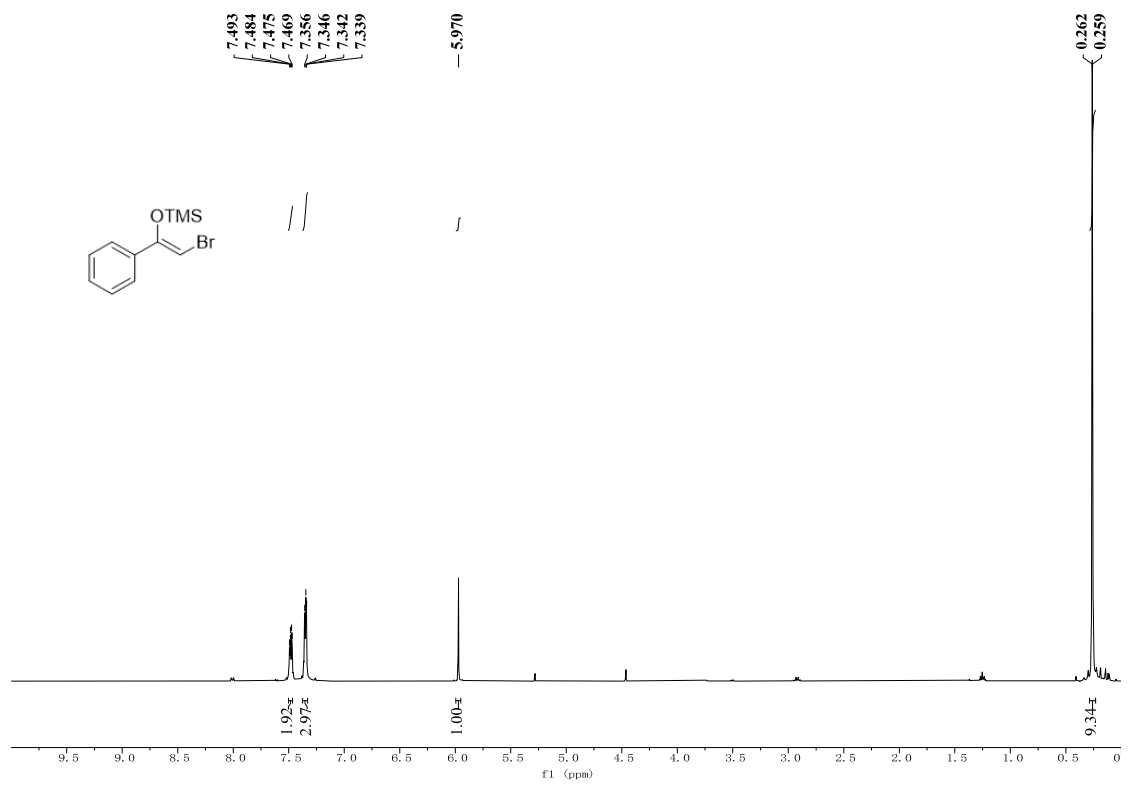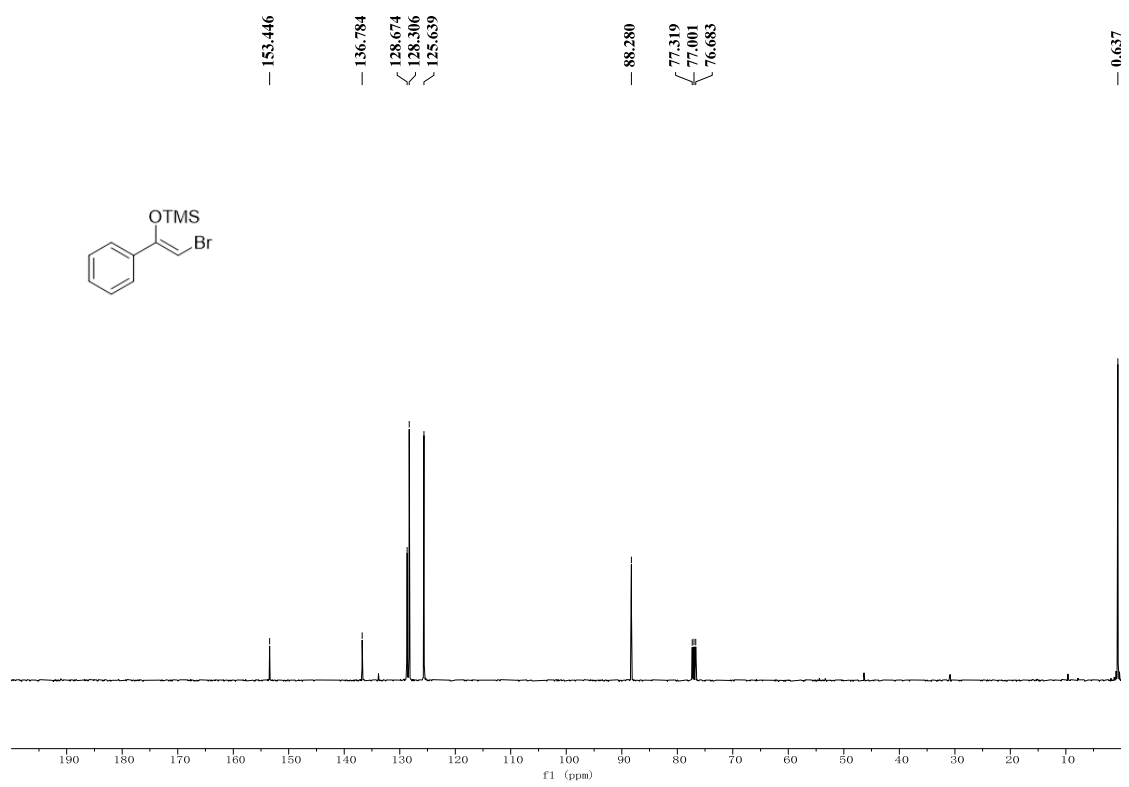

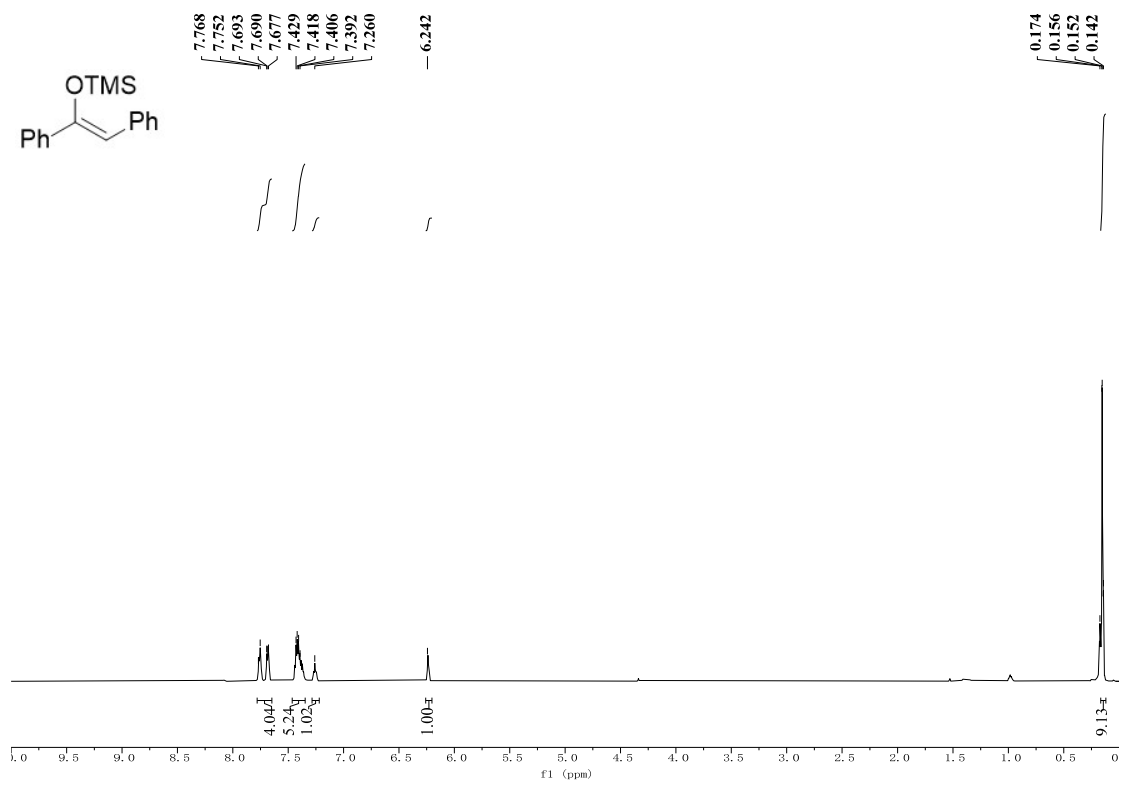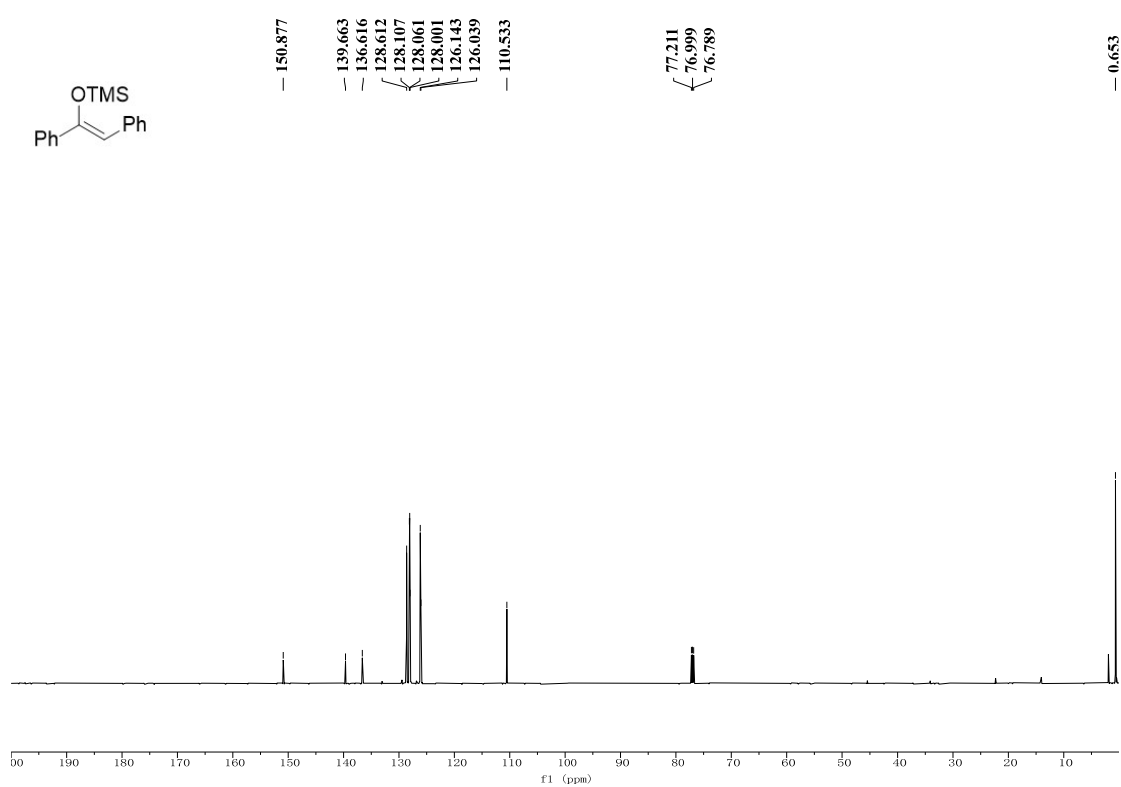

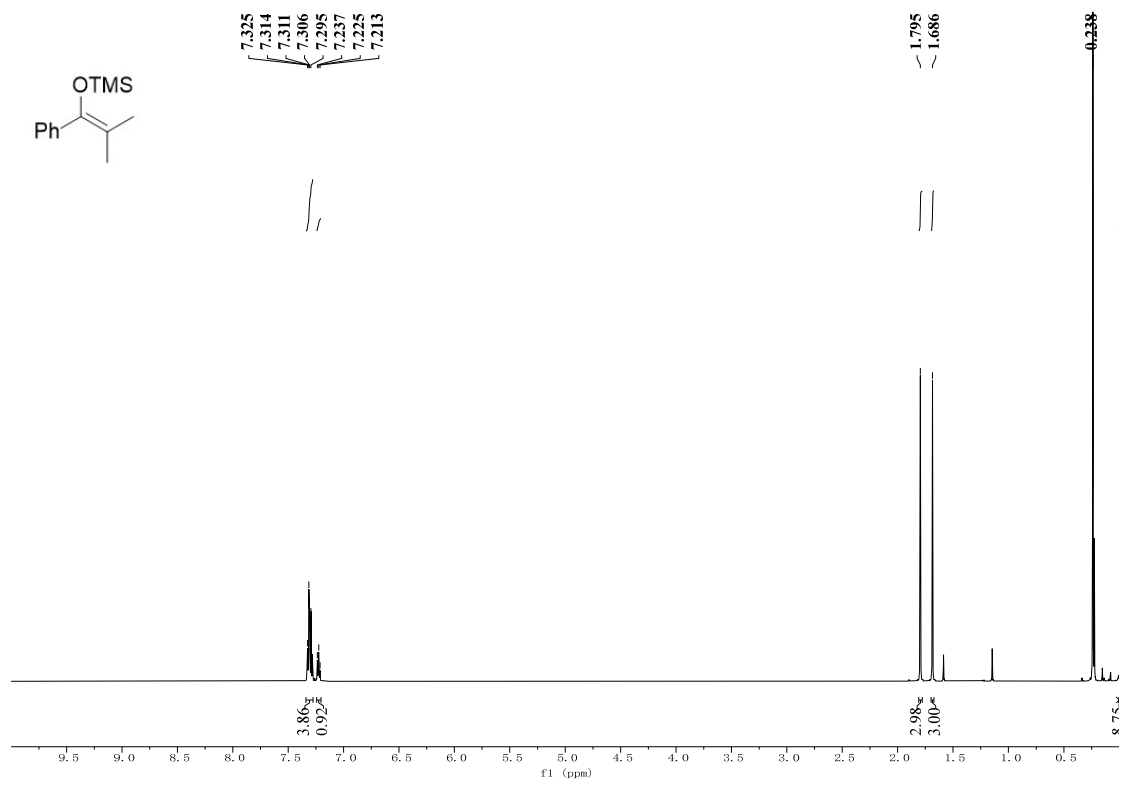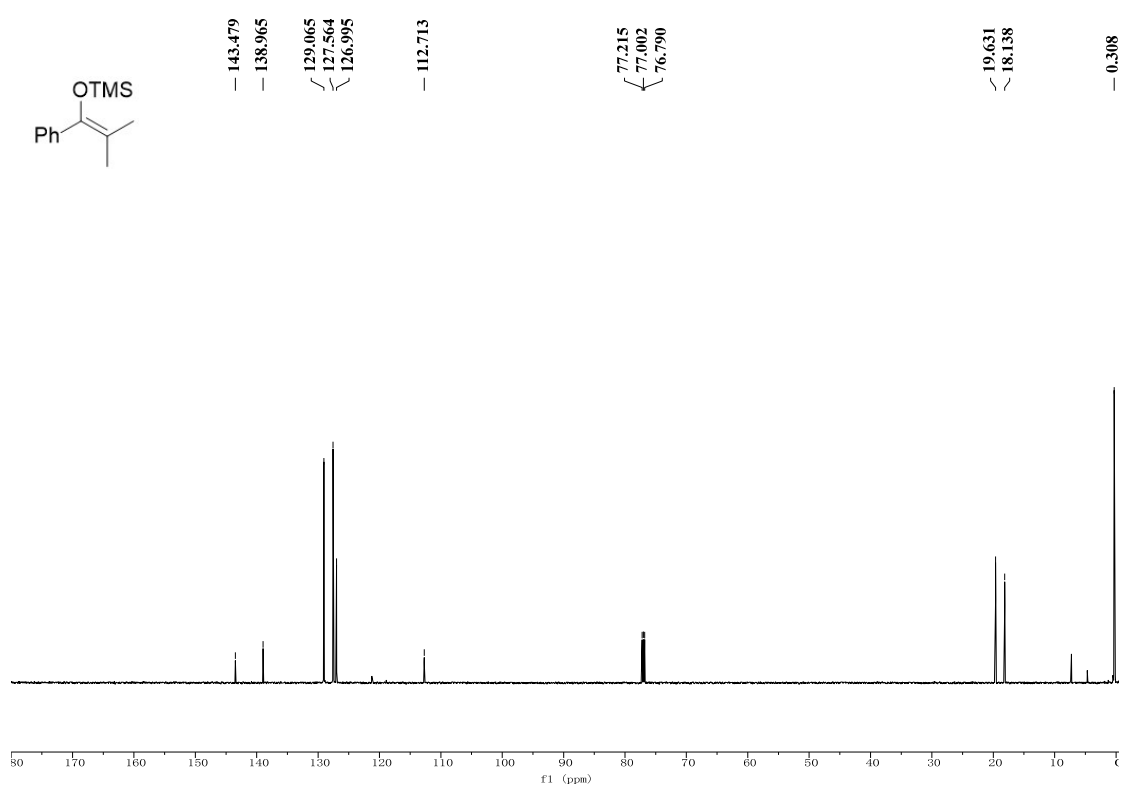

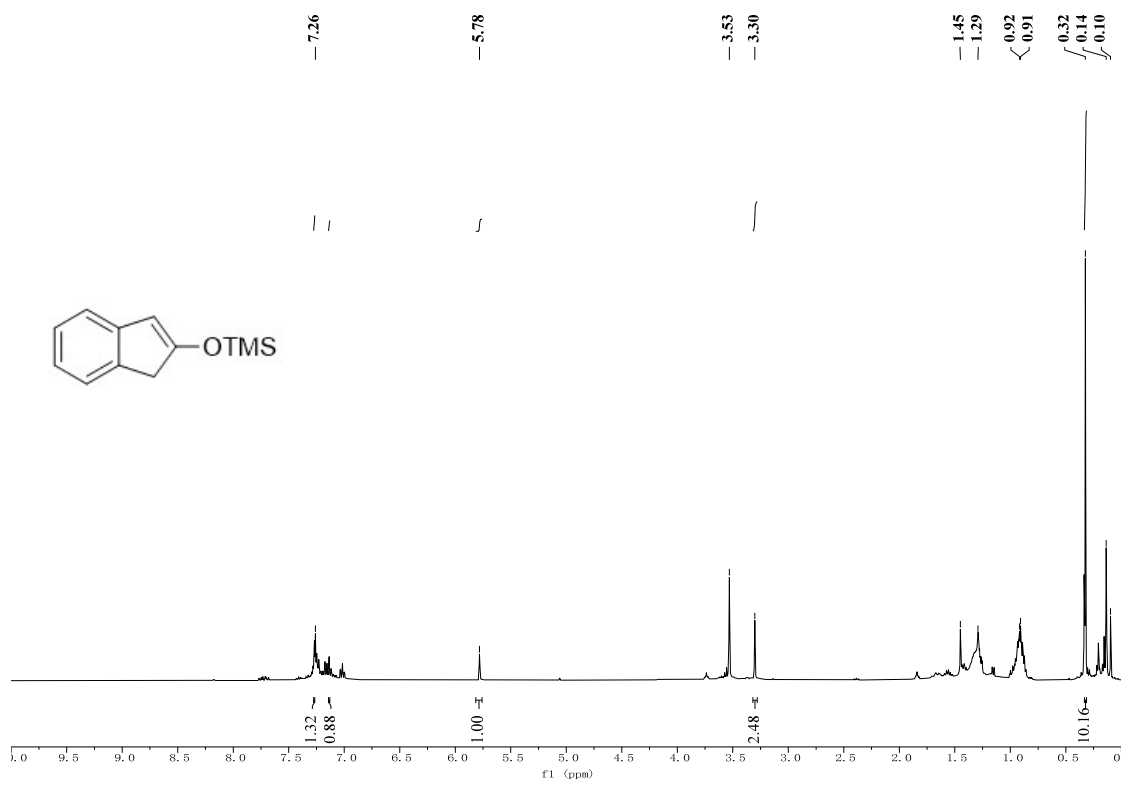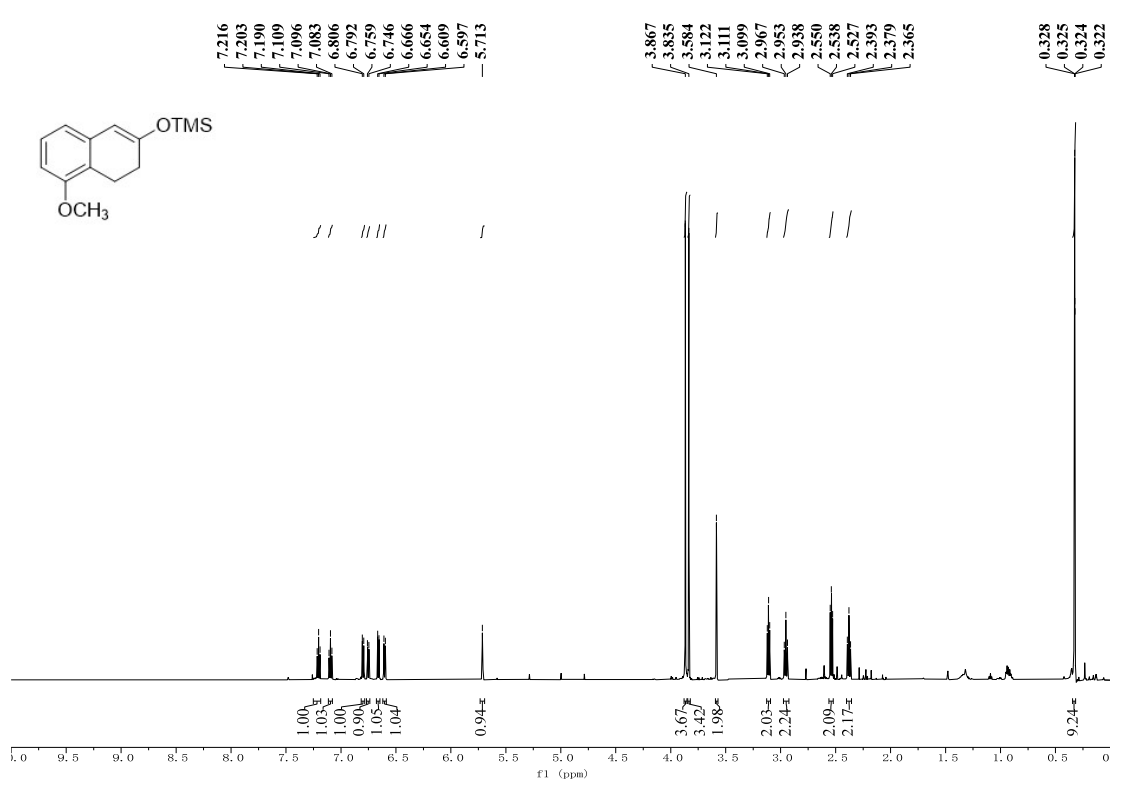

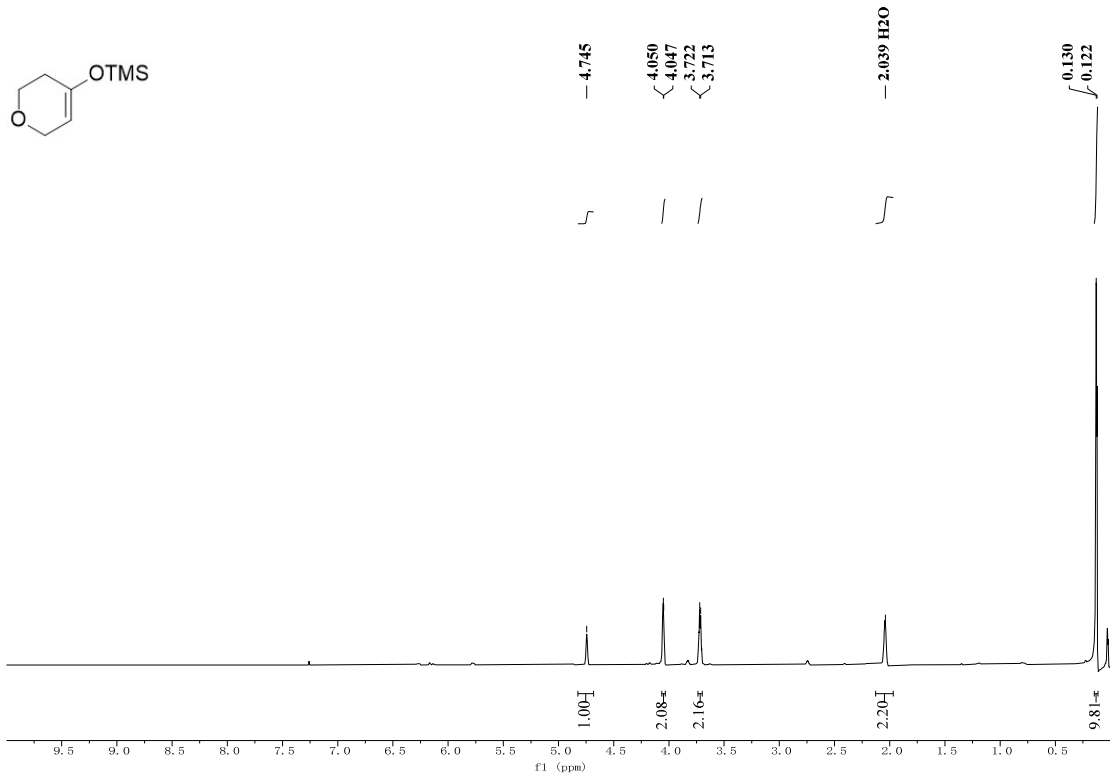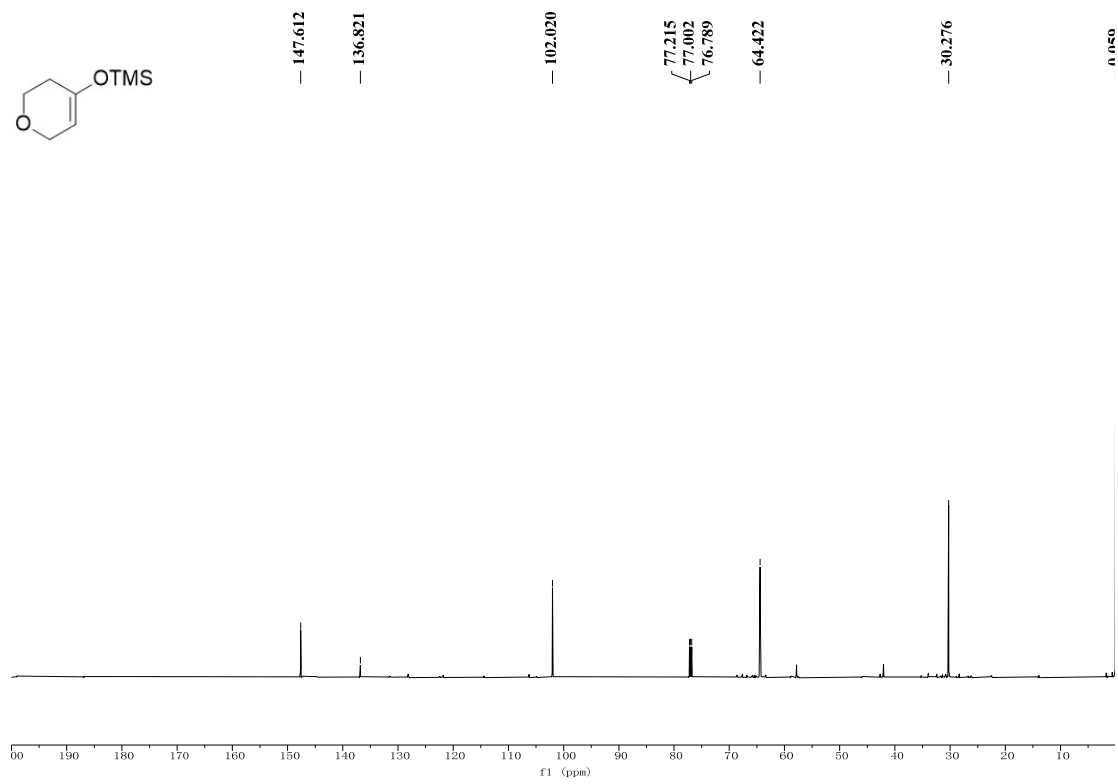

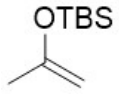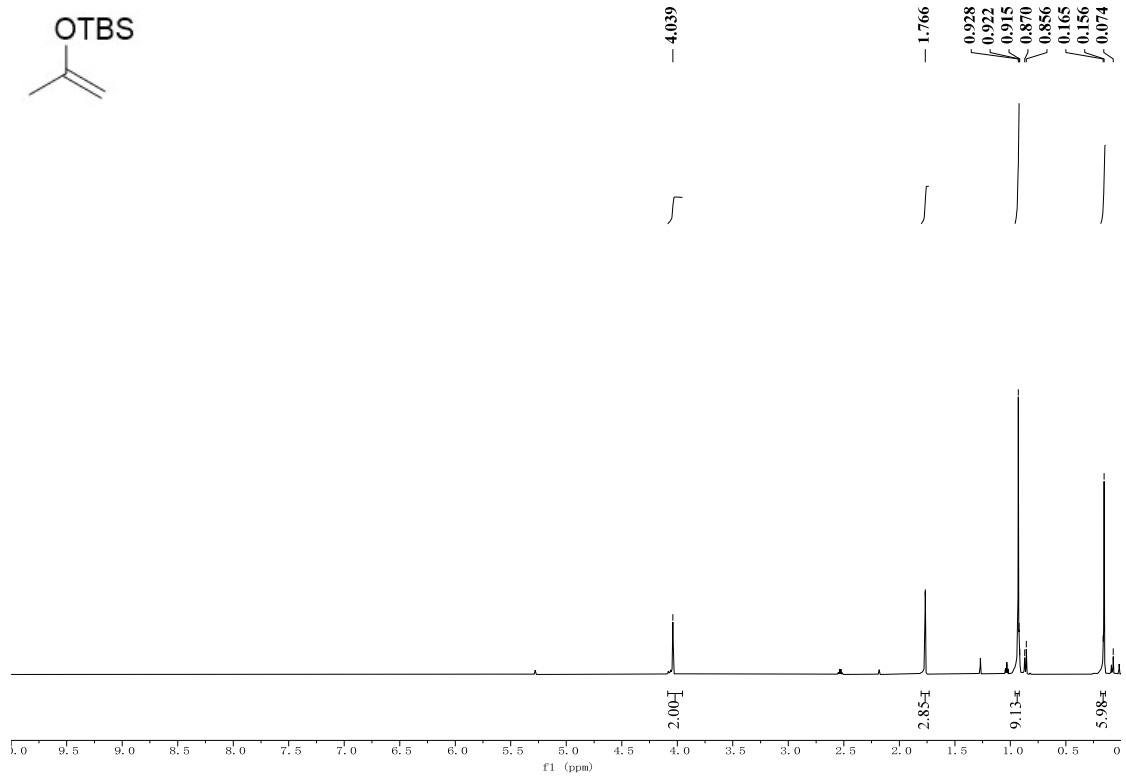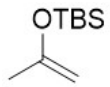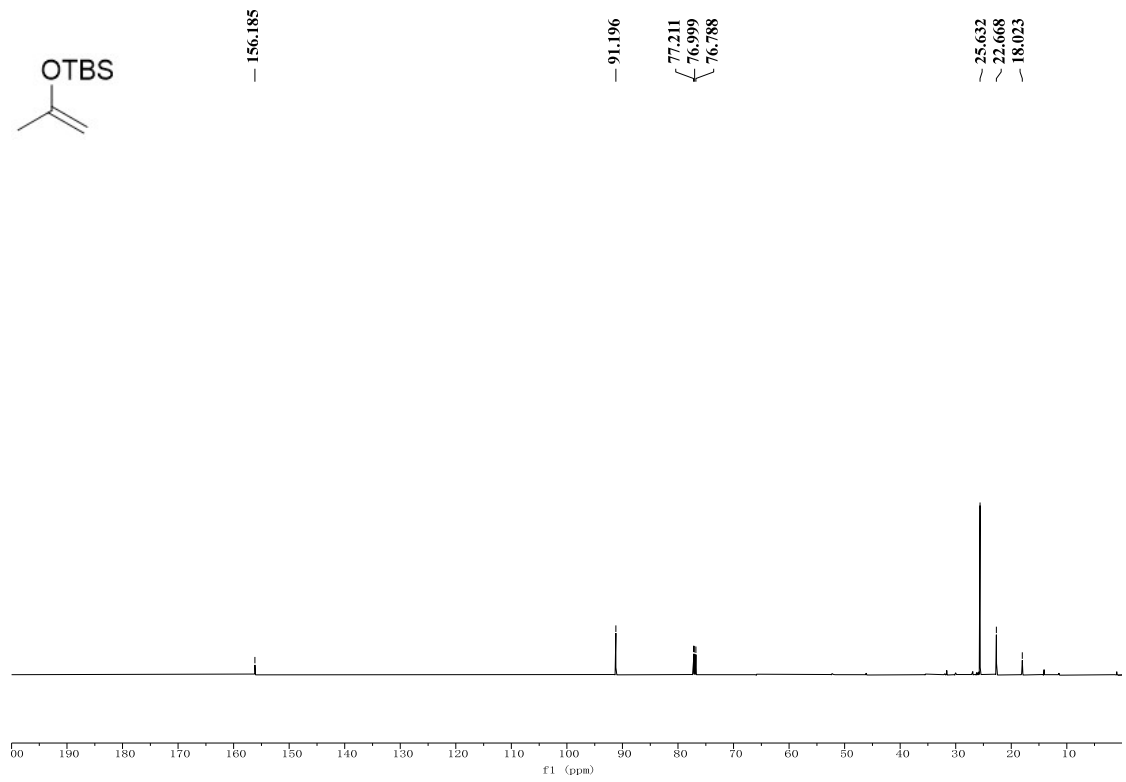



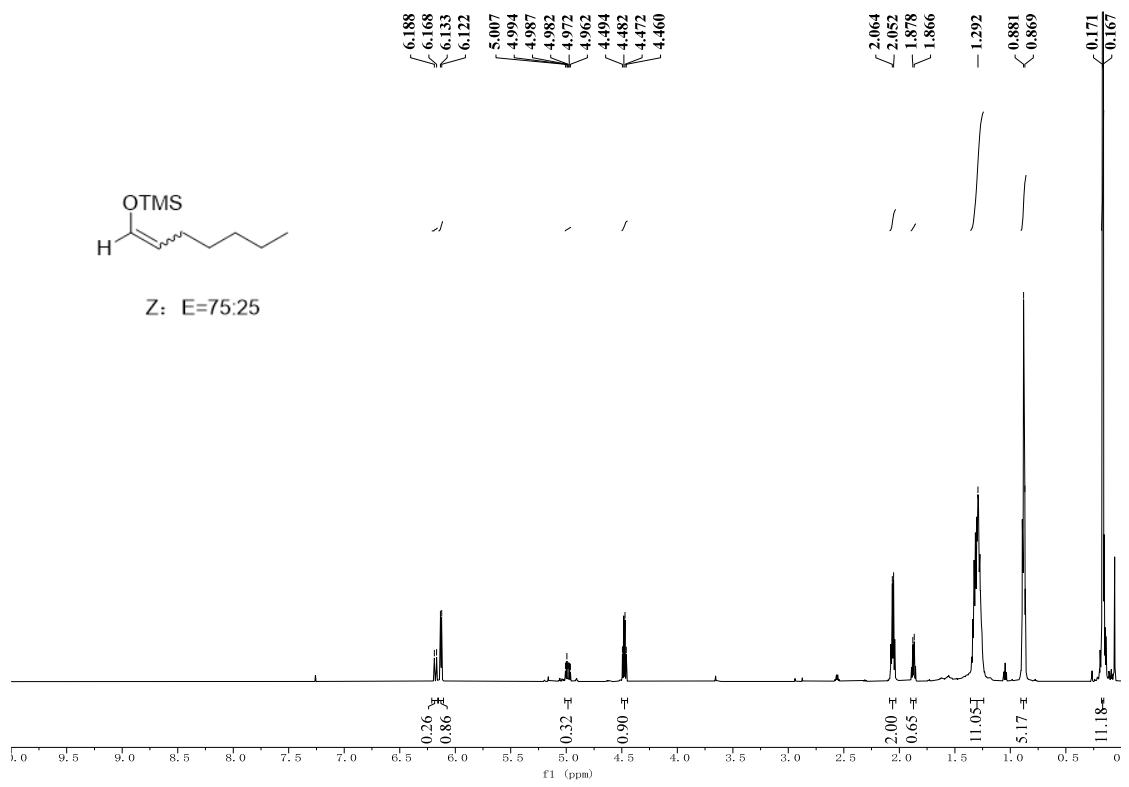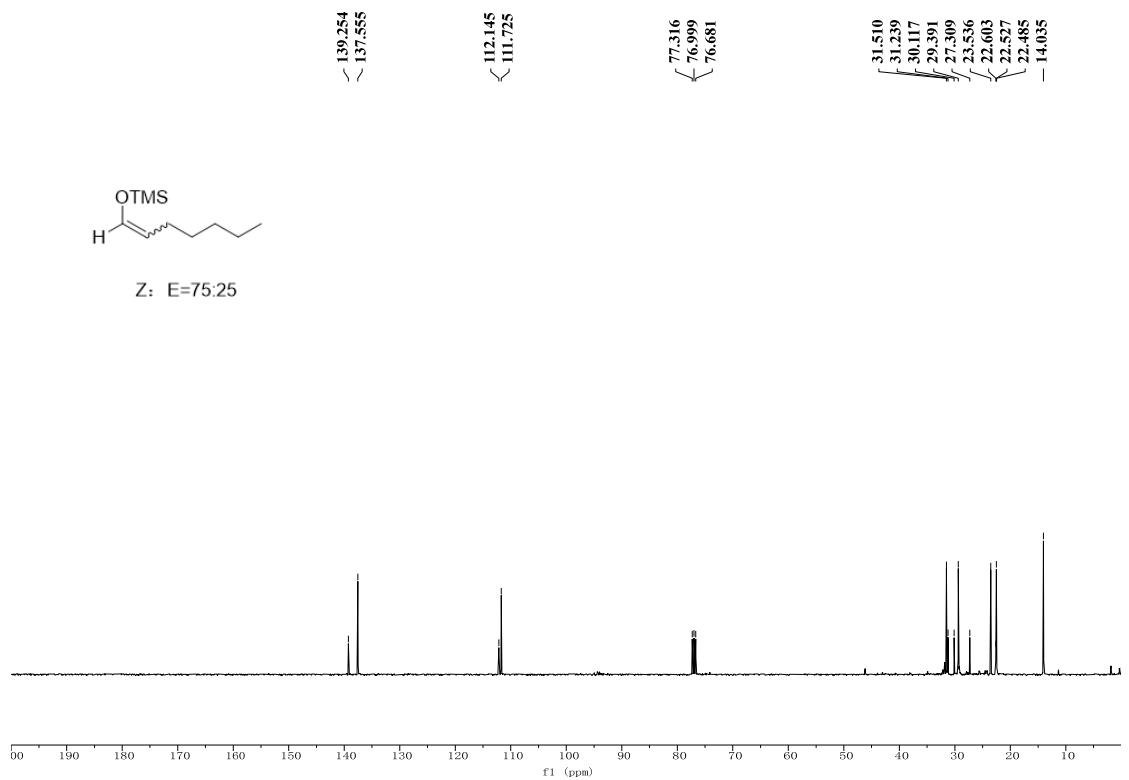

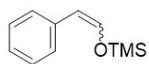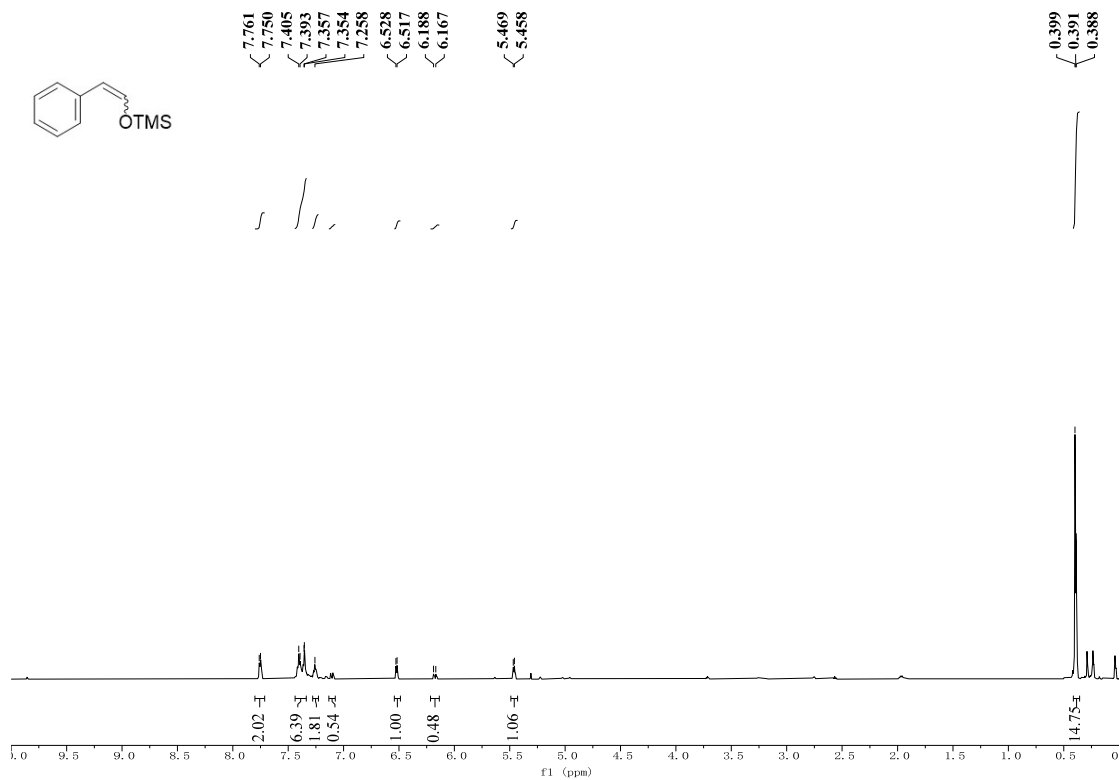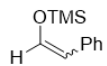

Z: E=2.1

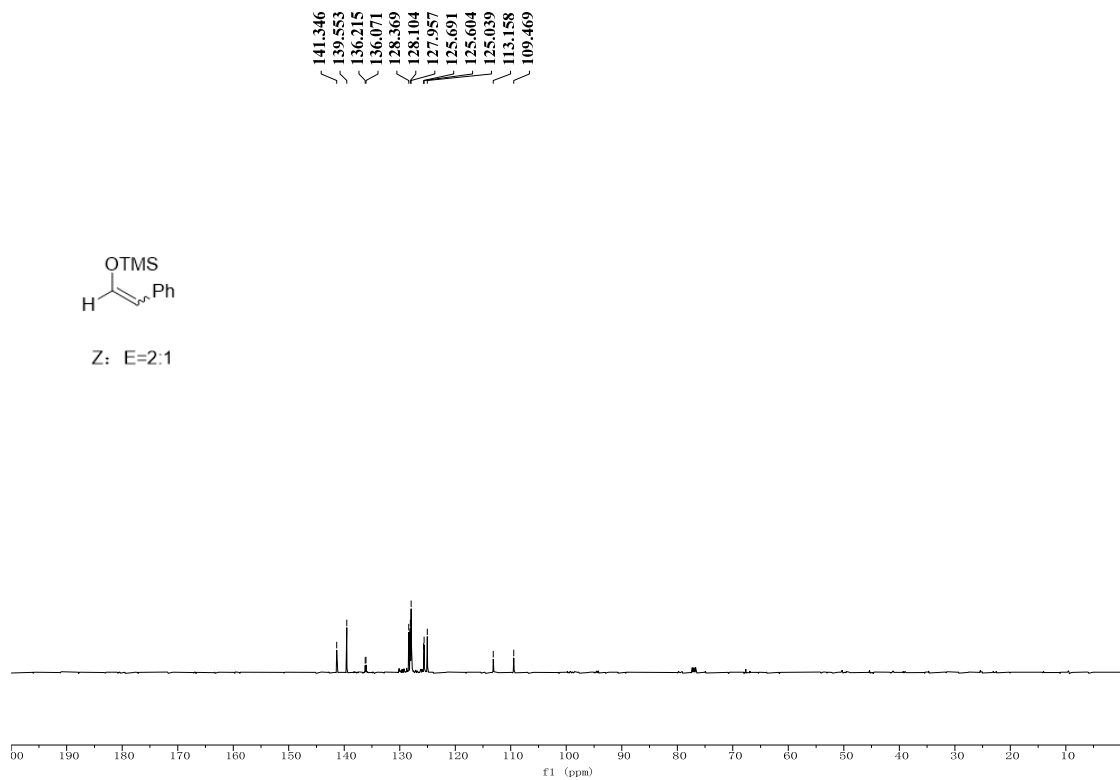

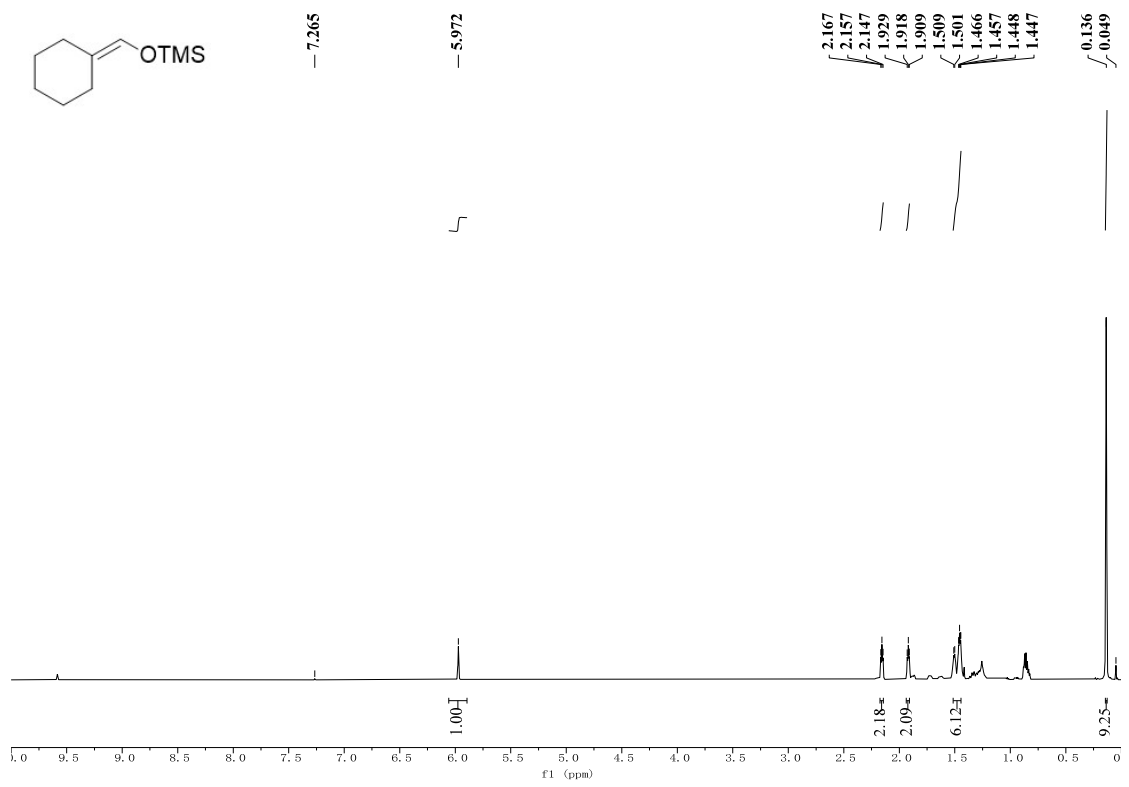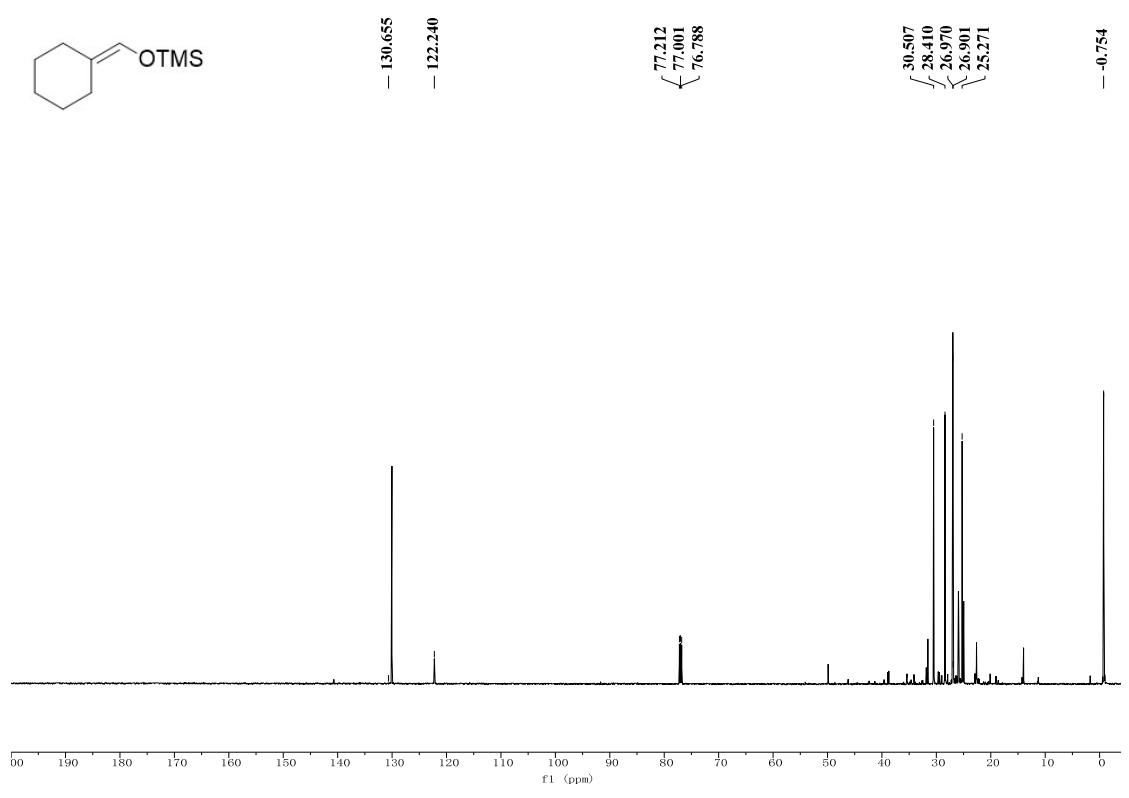

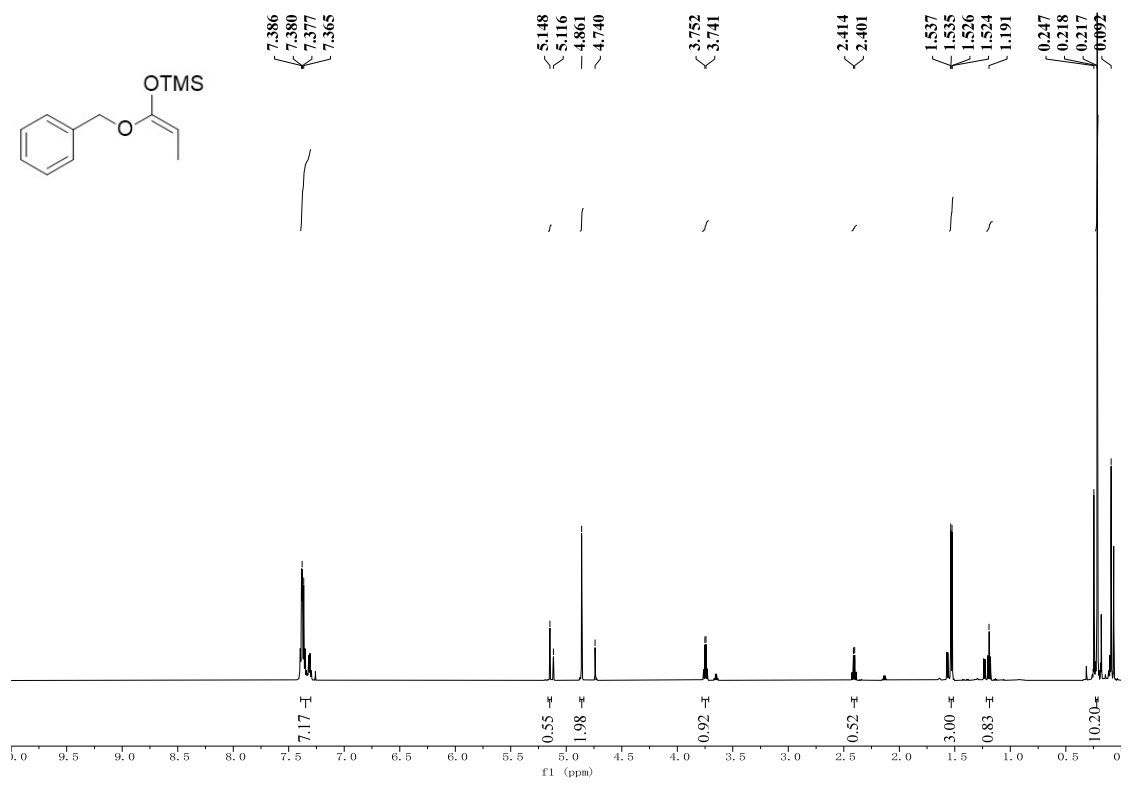

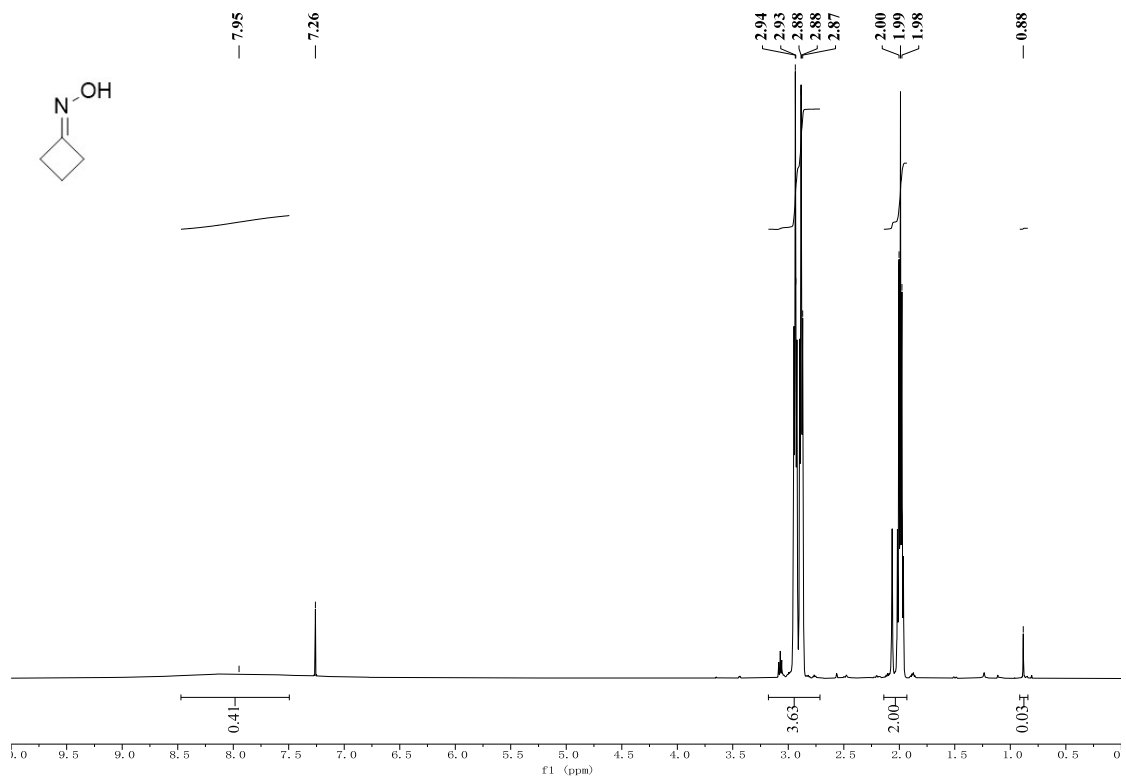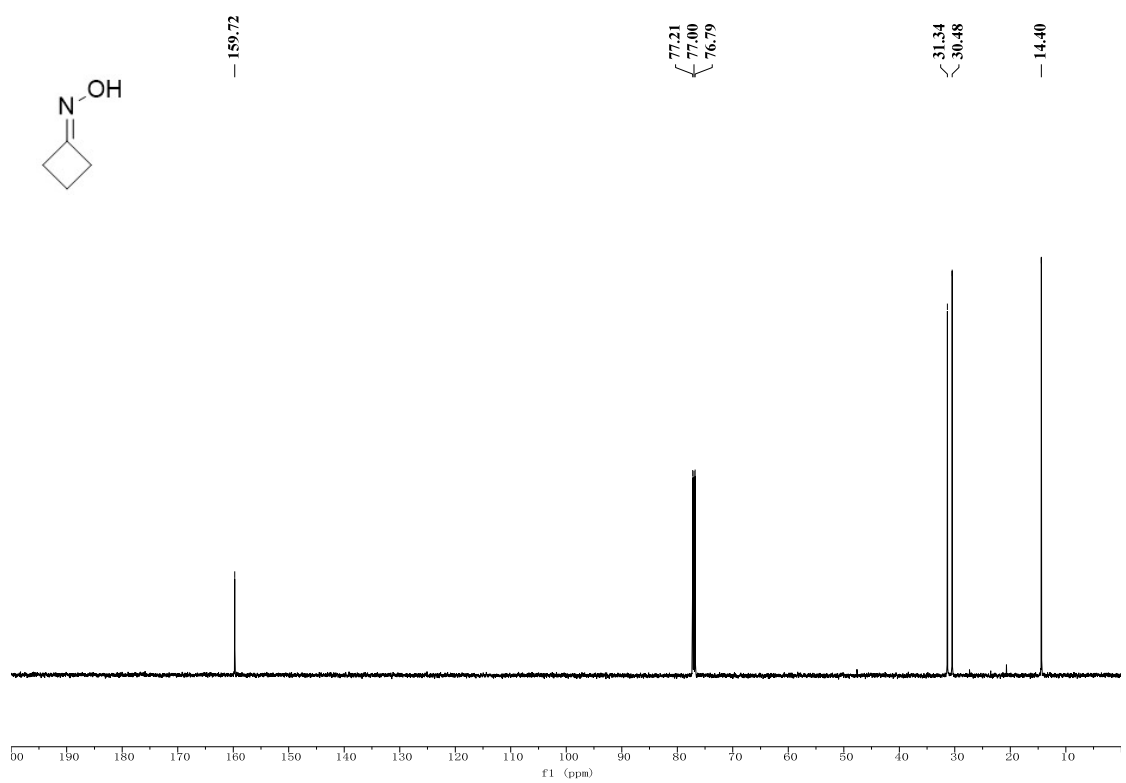

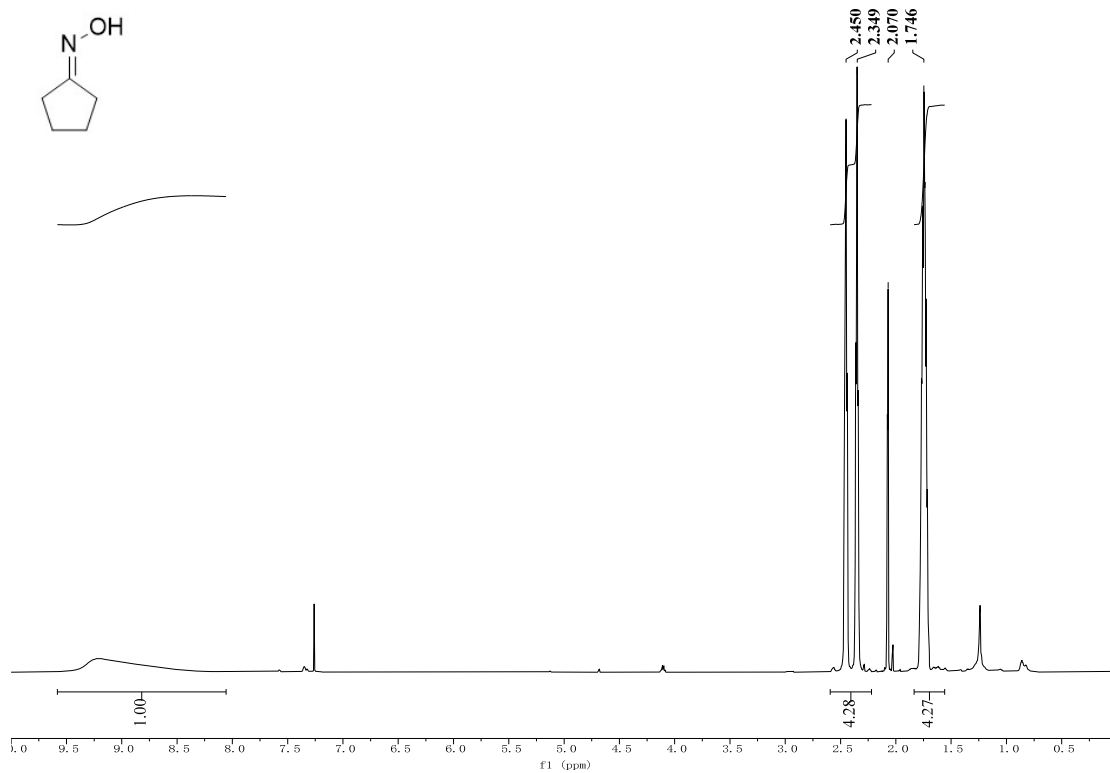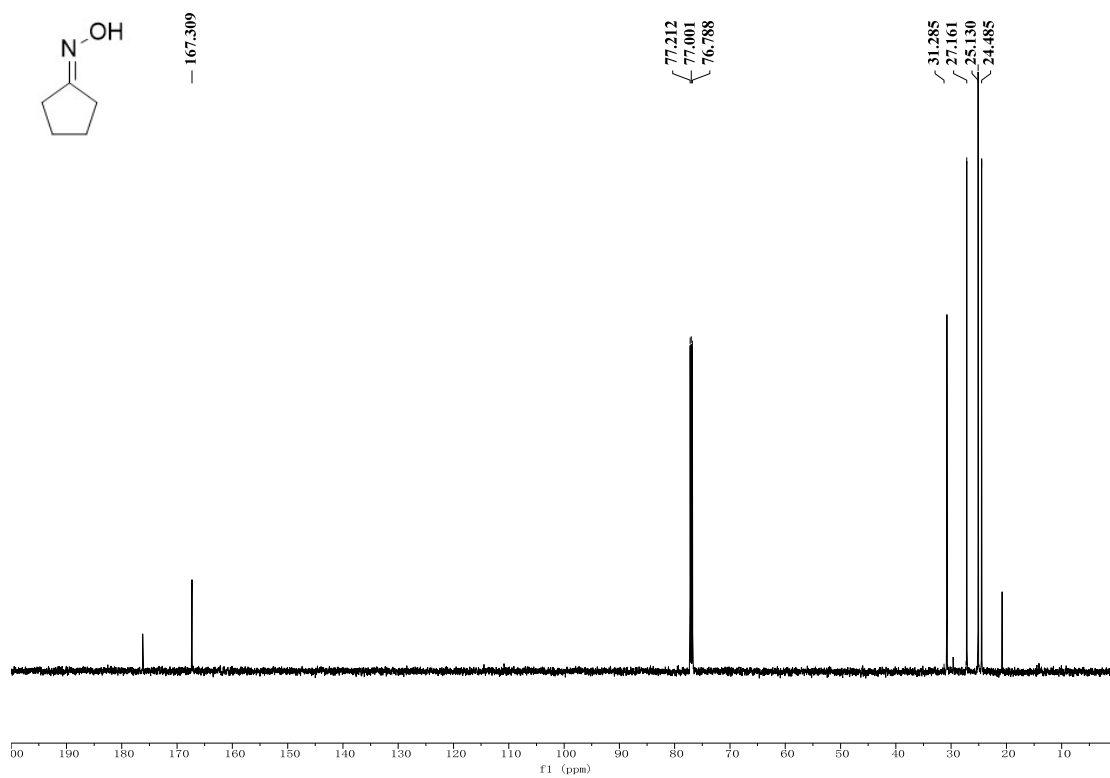

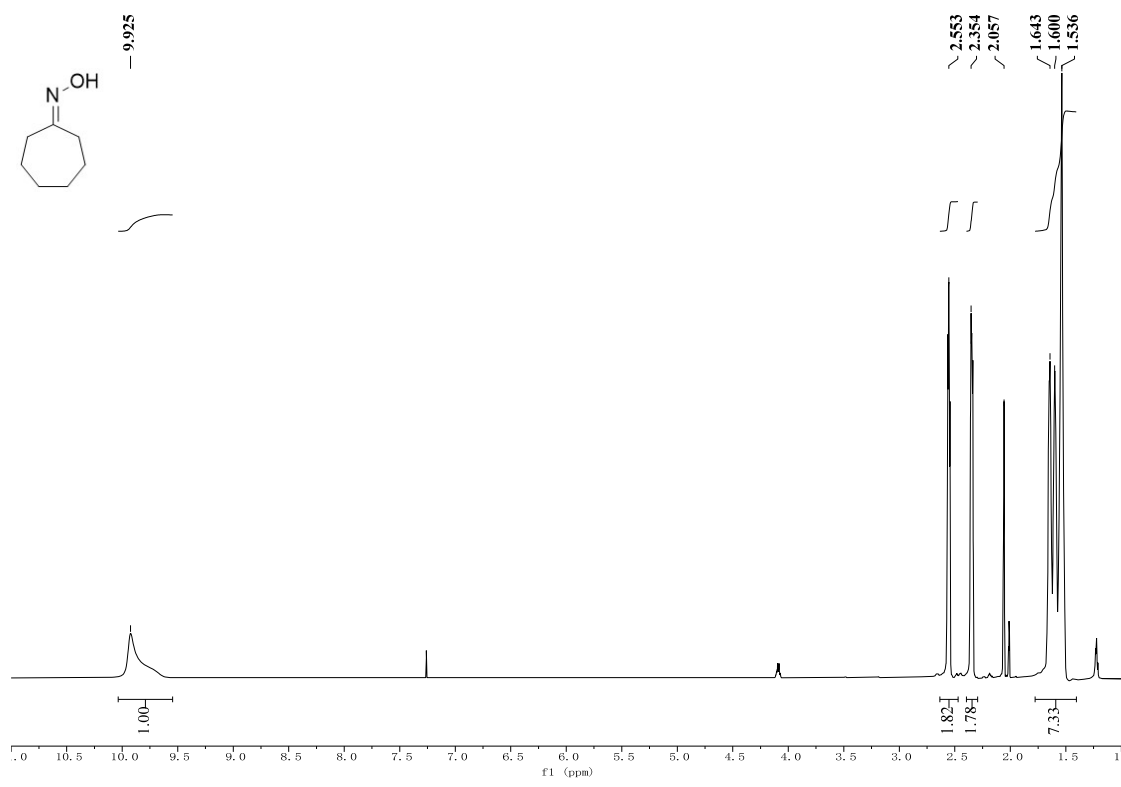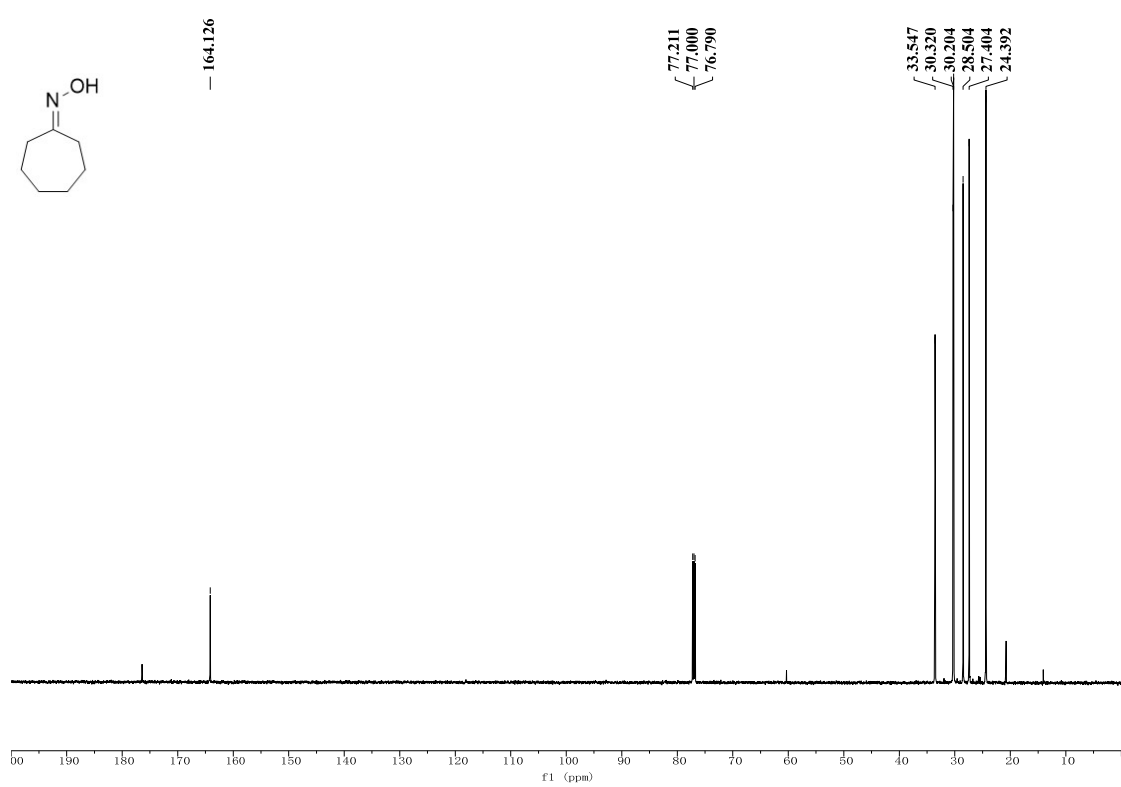

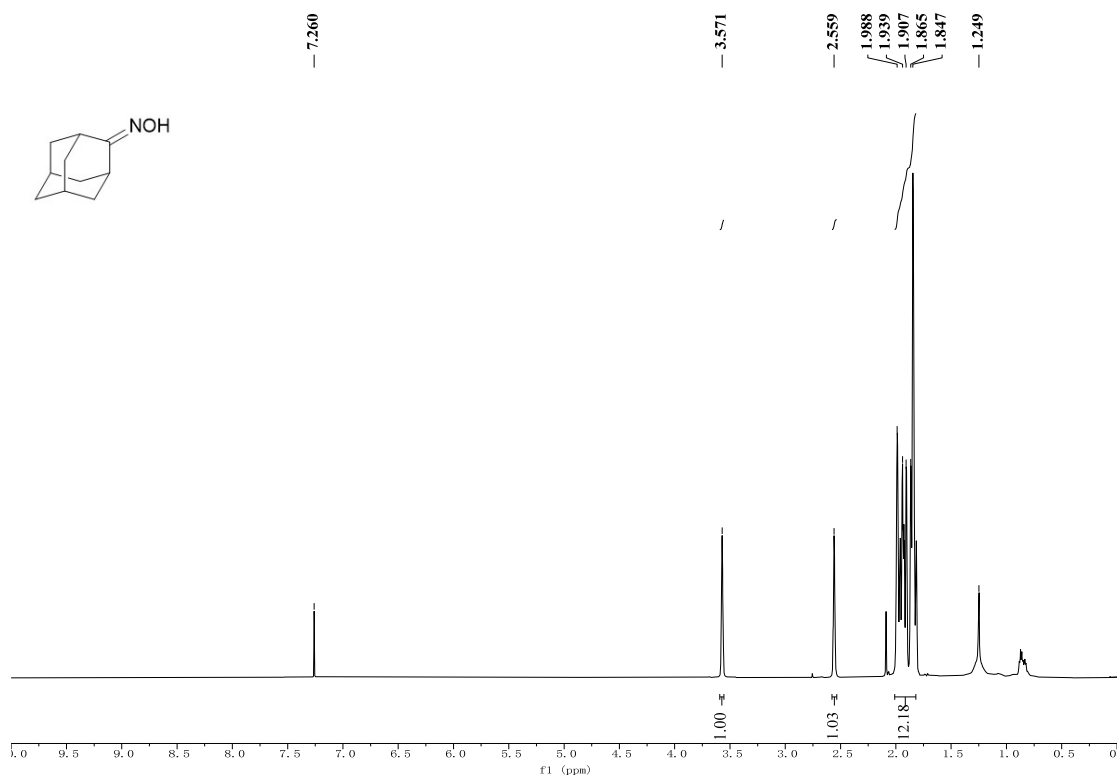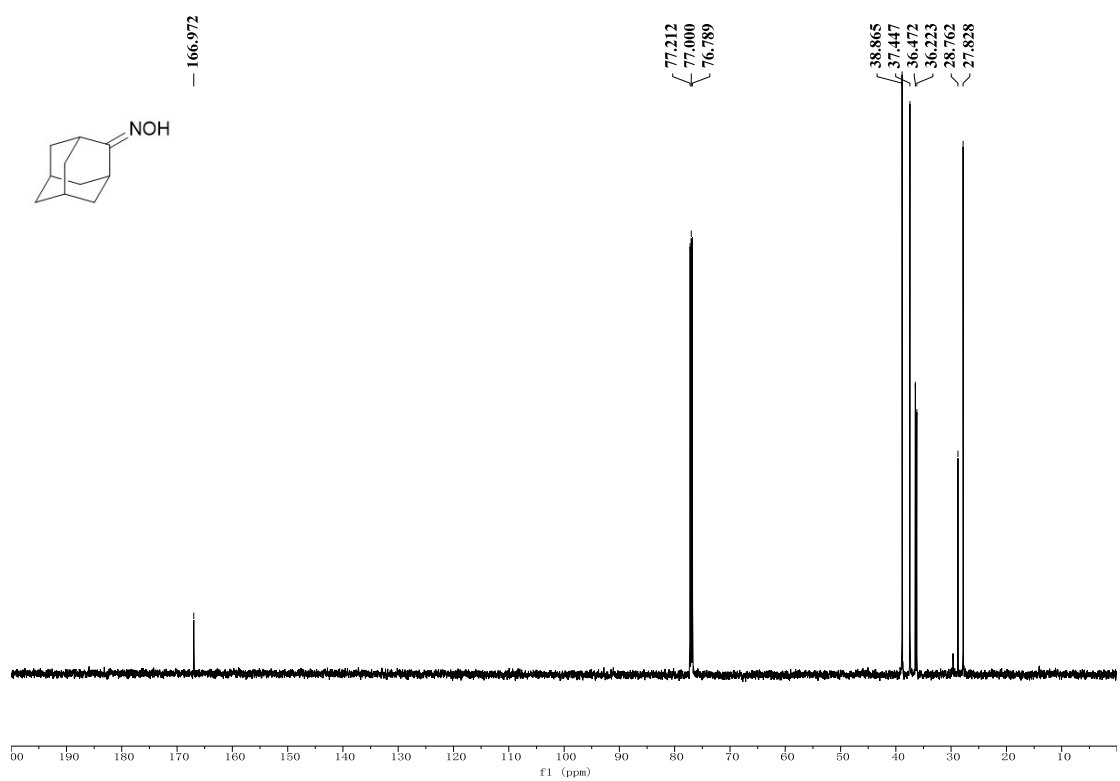



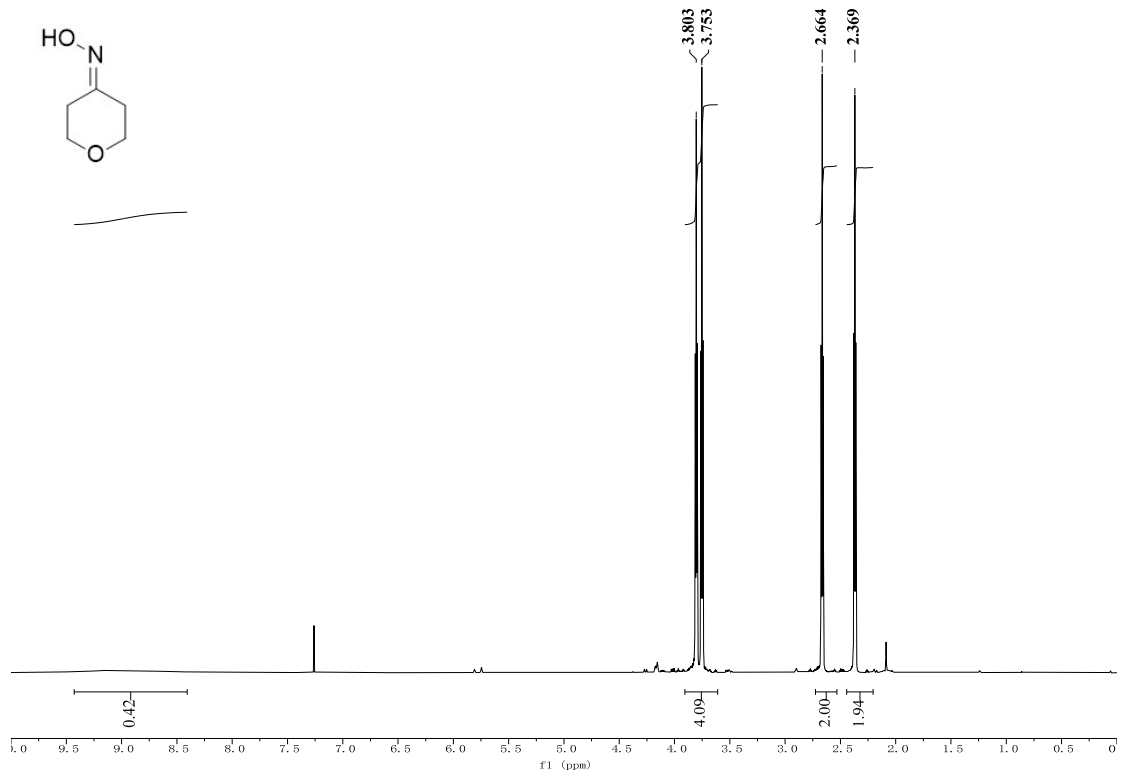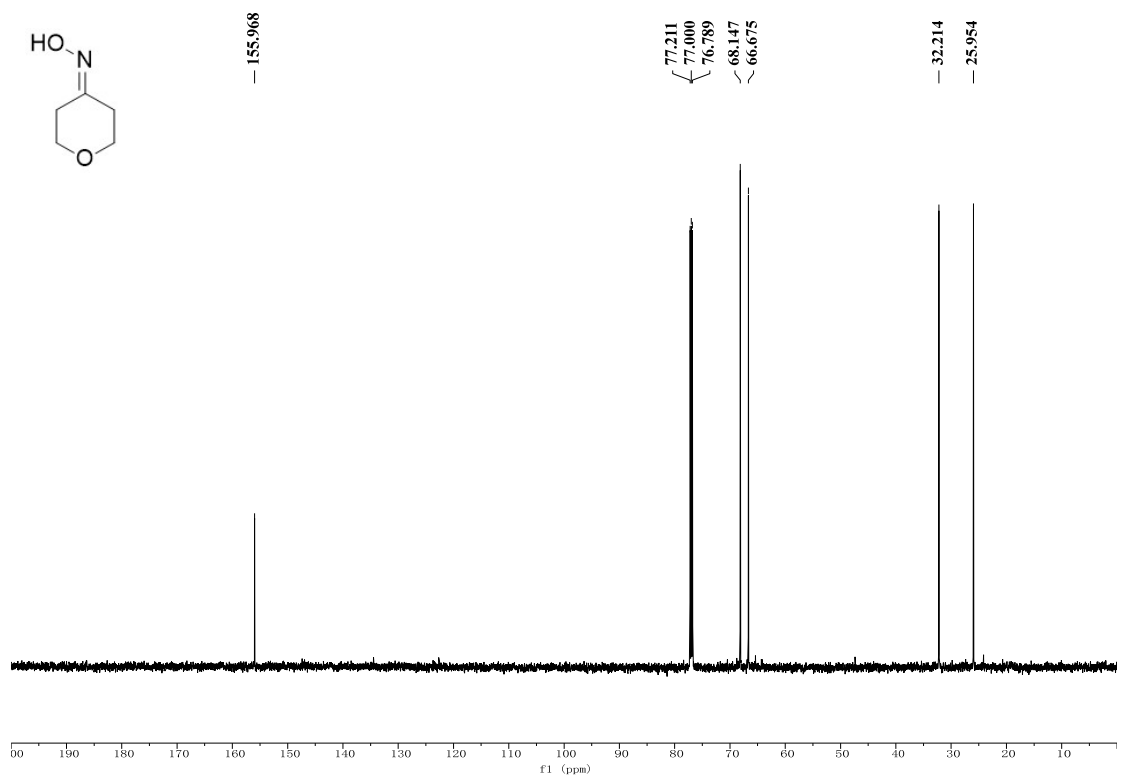

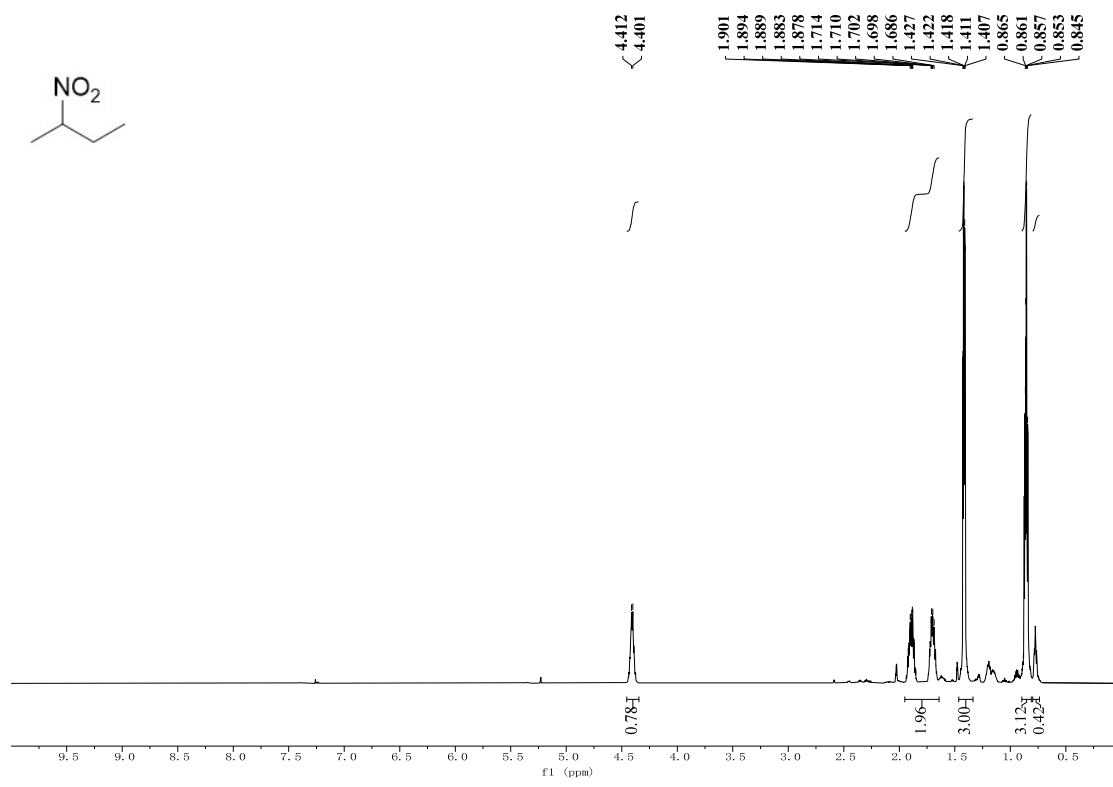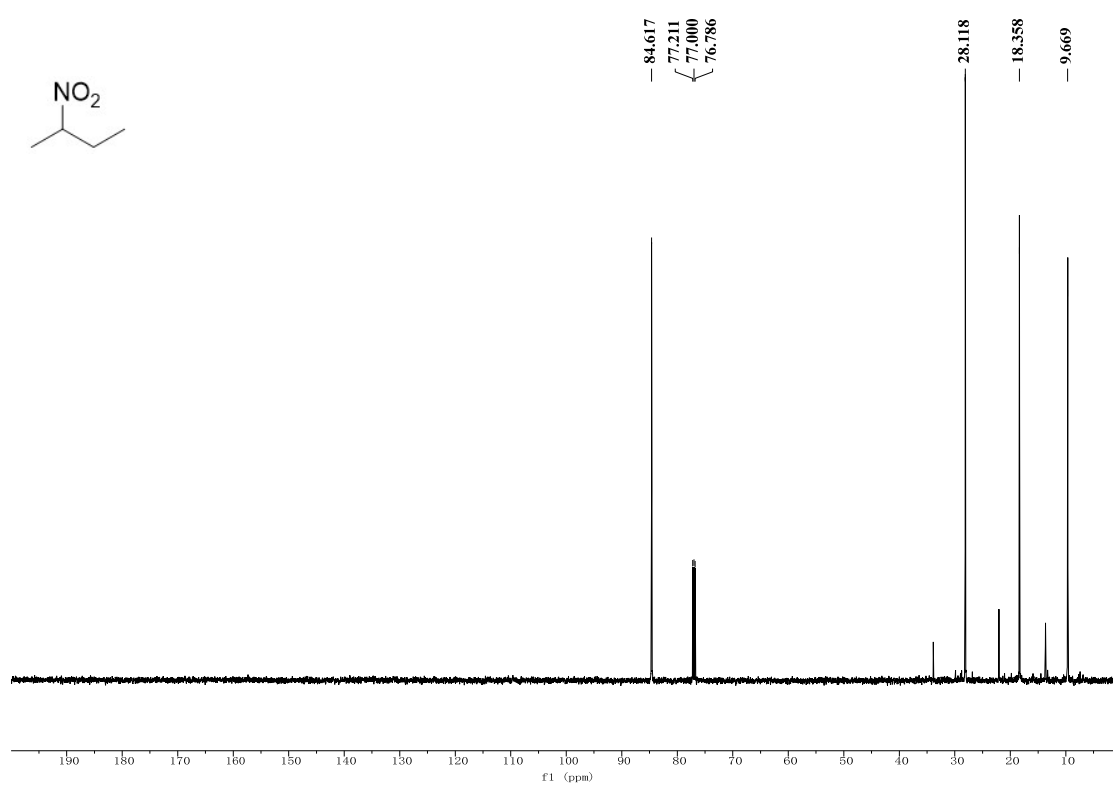

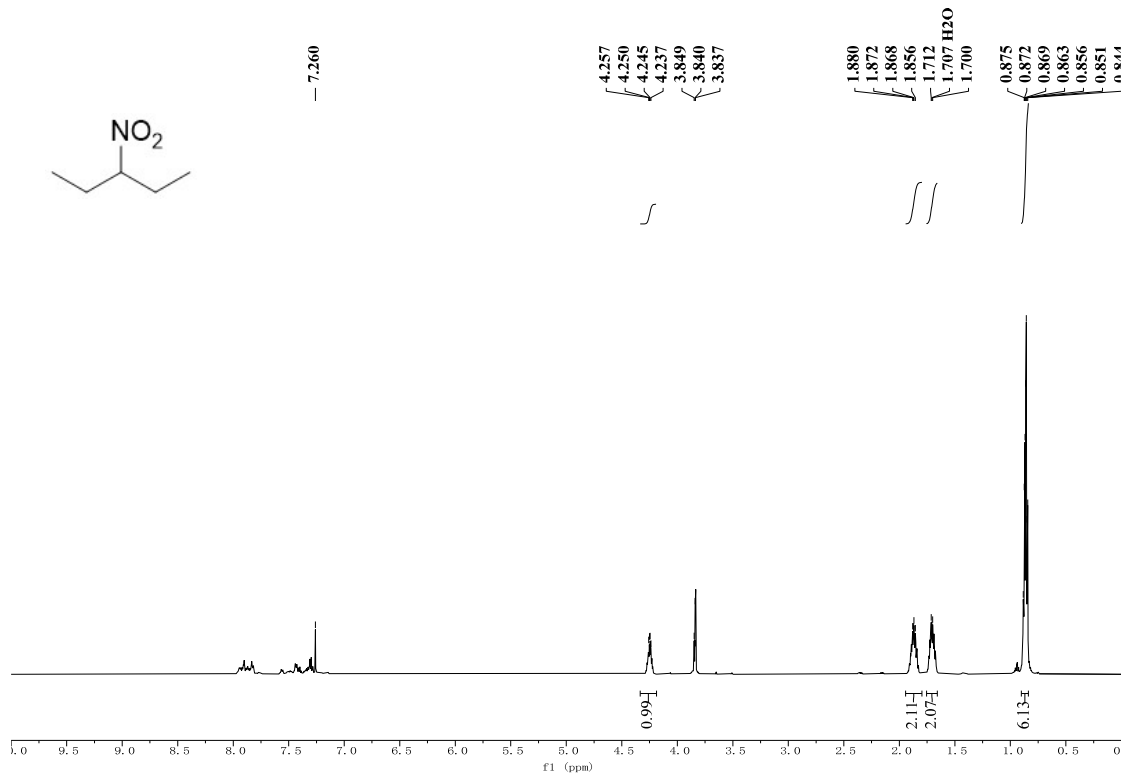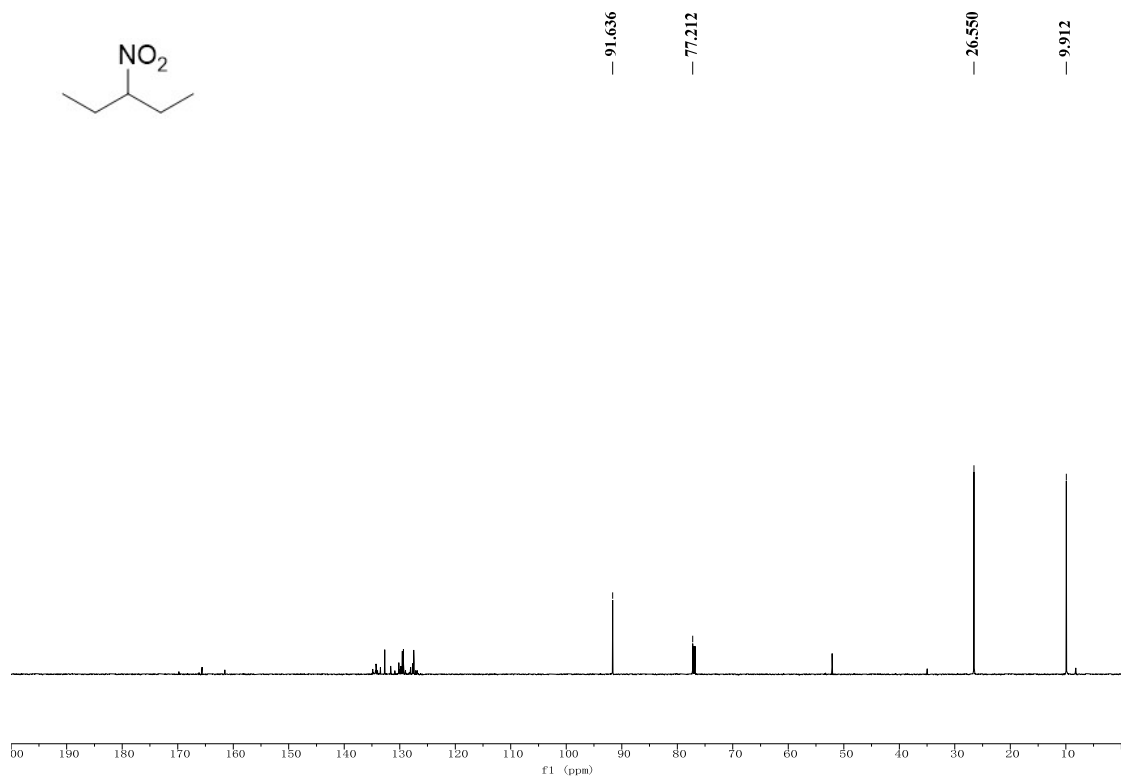

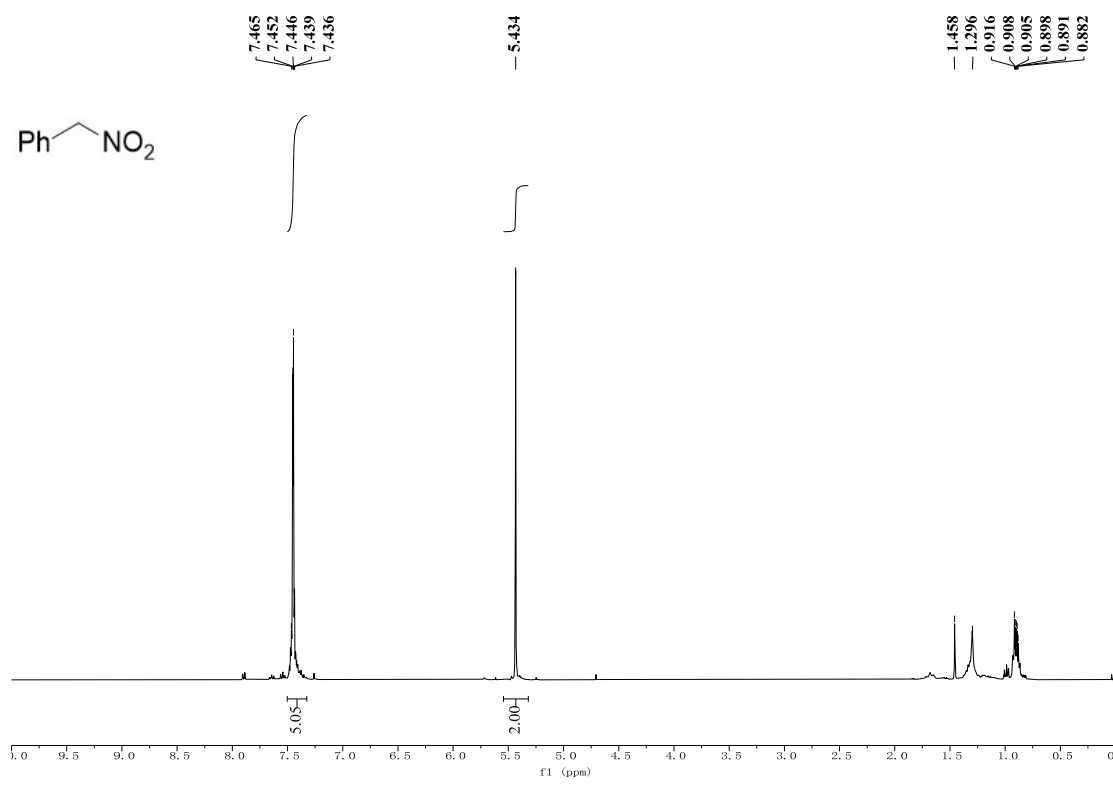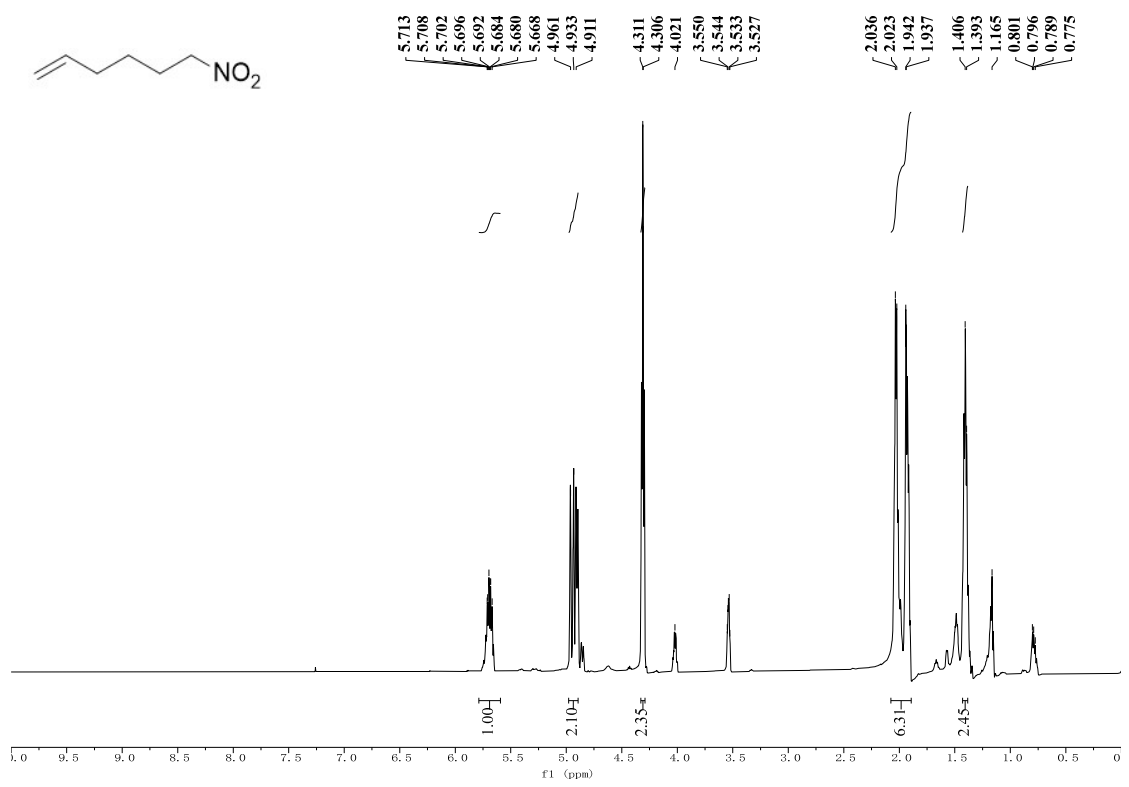

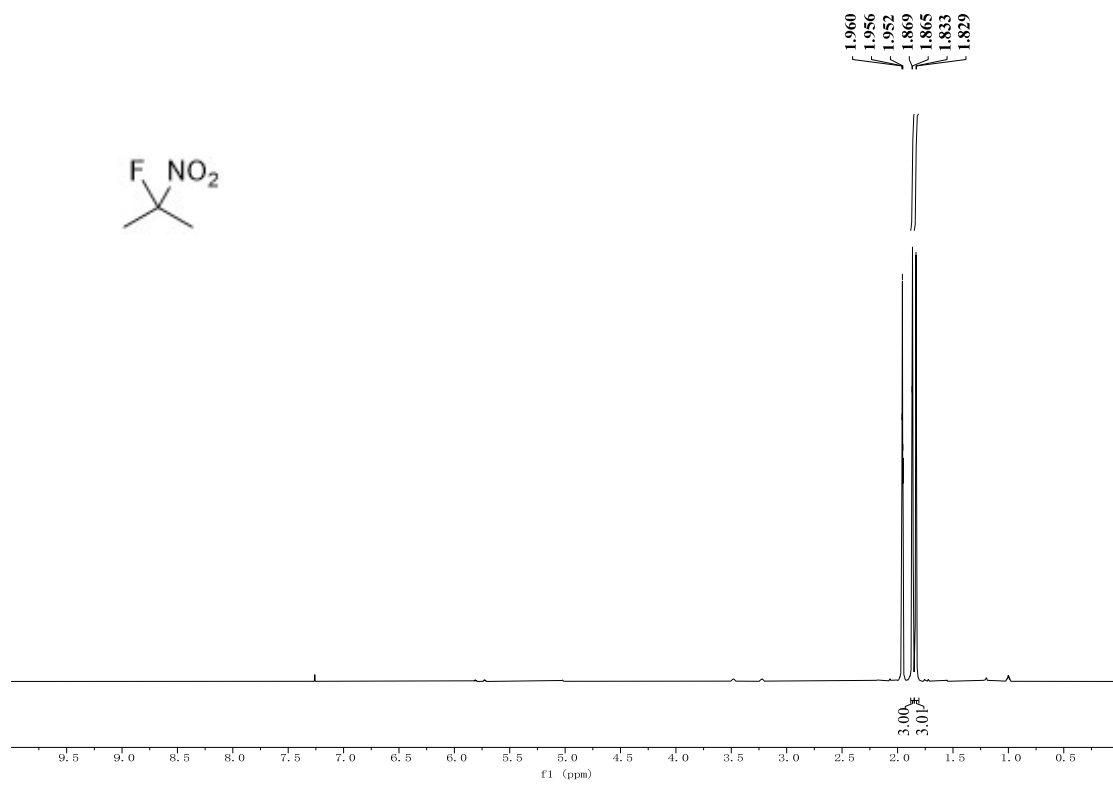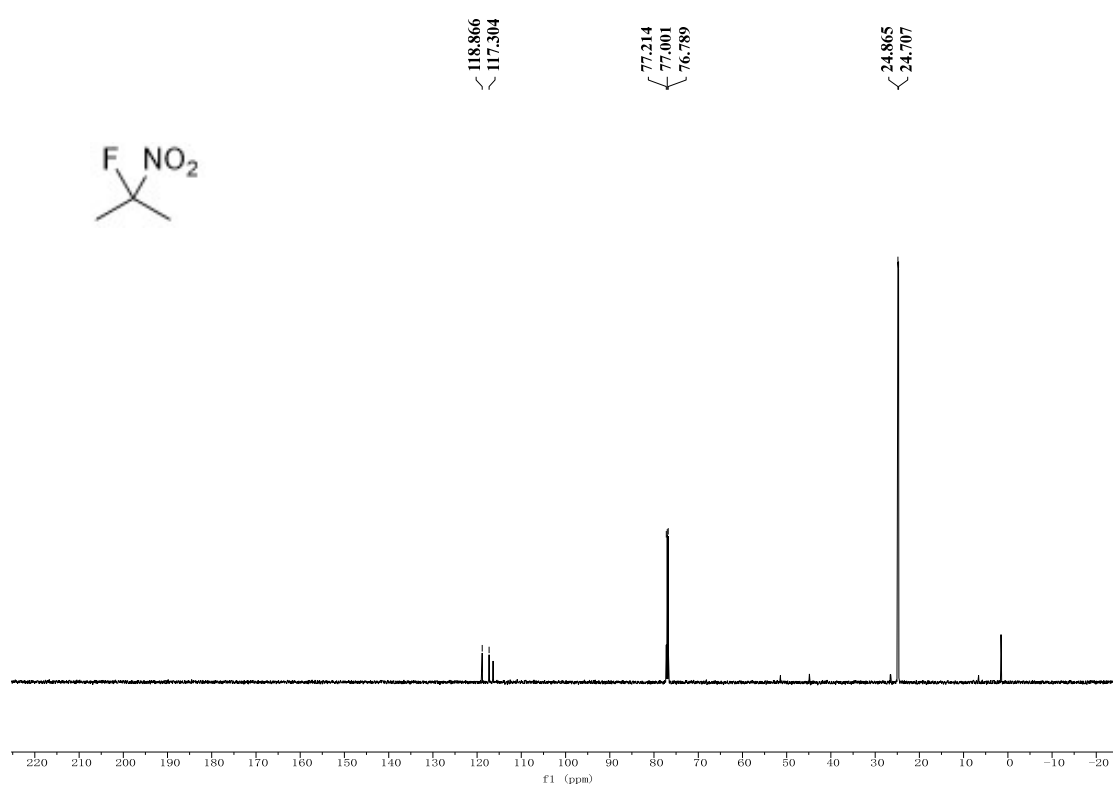

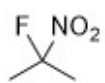

86.111

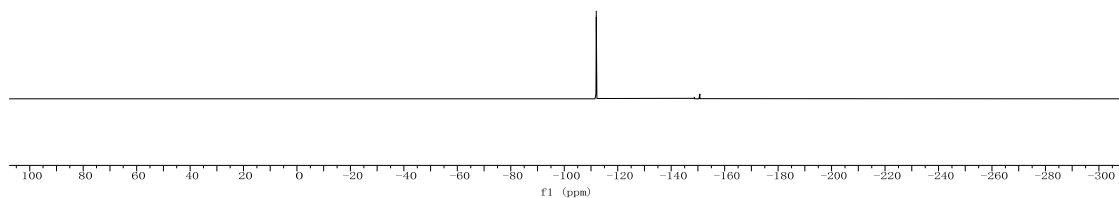

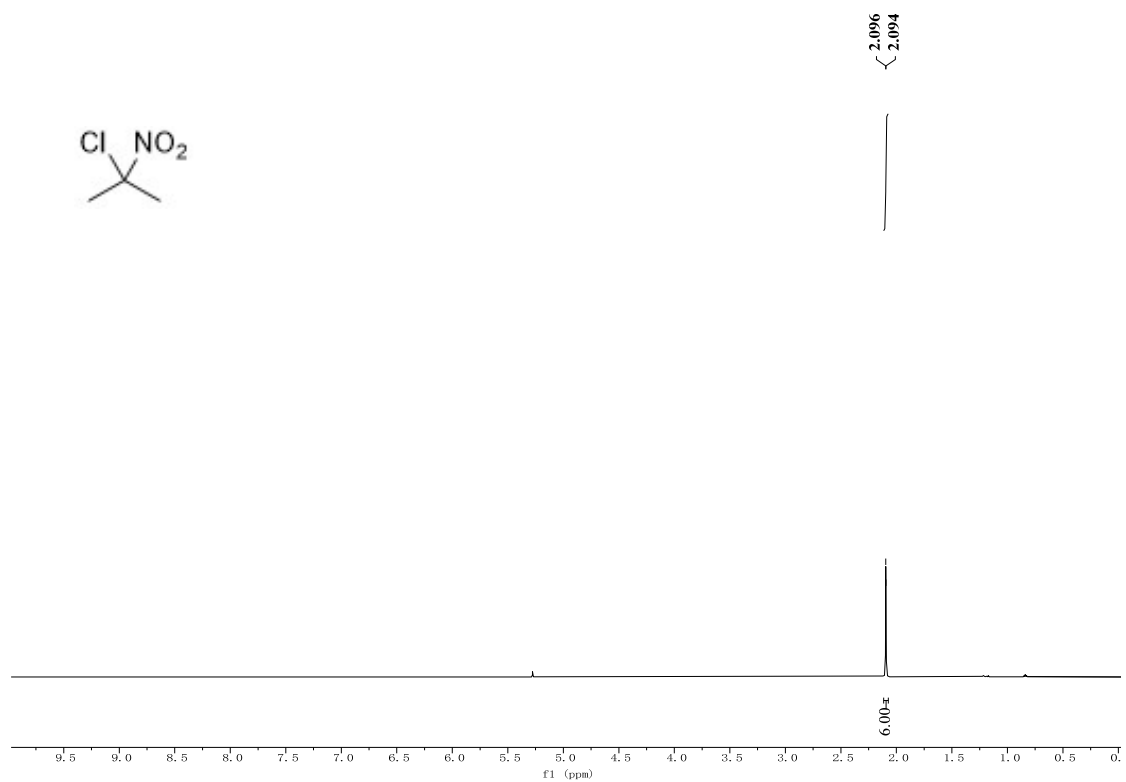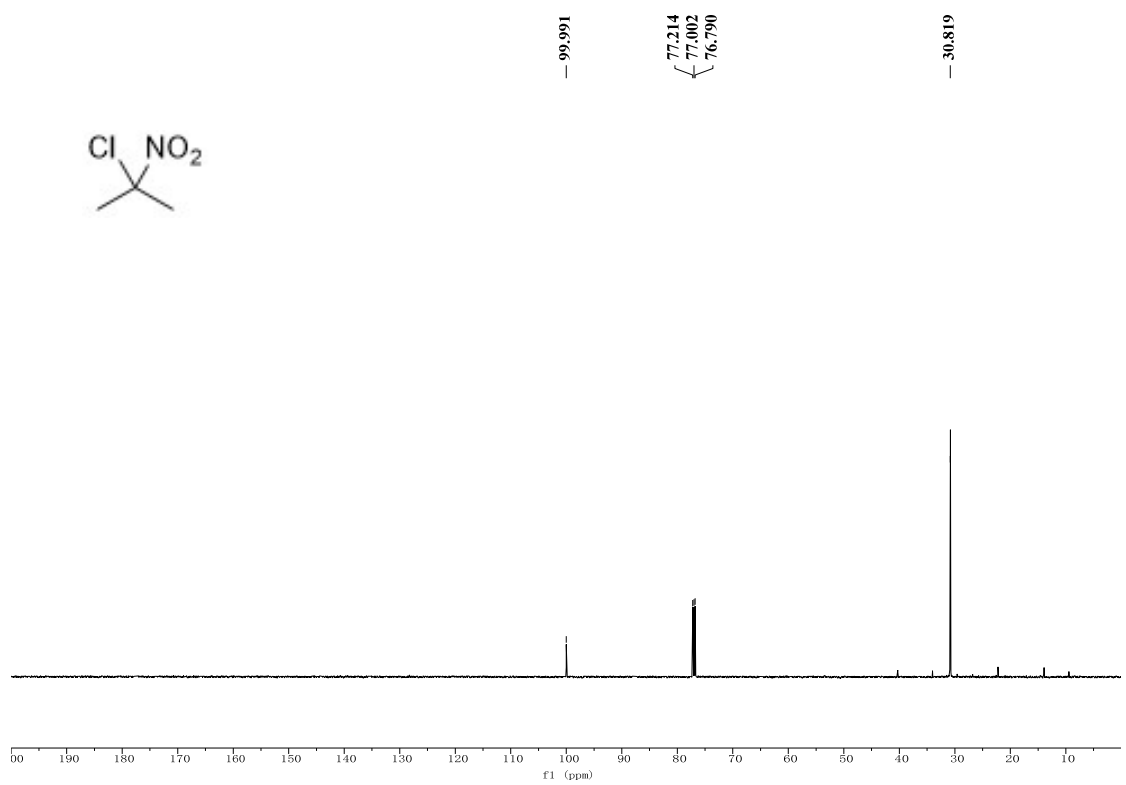

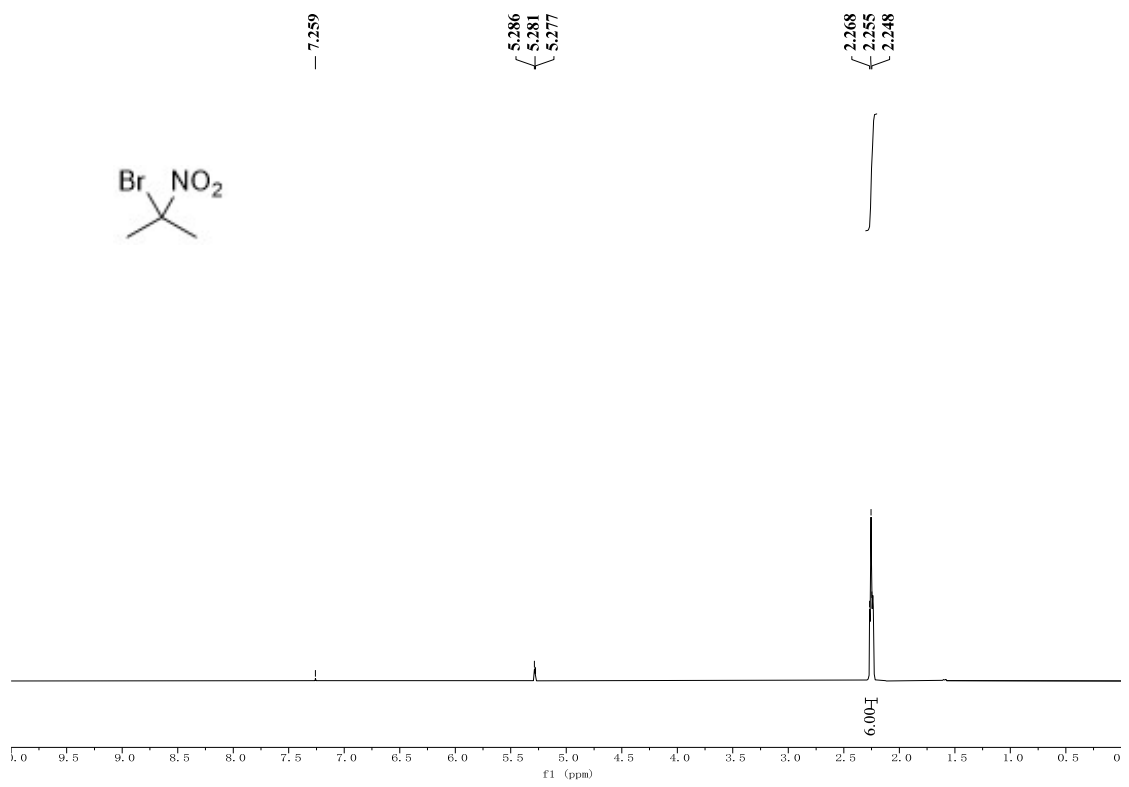



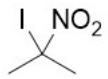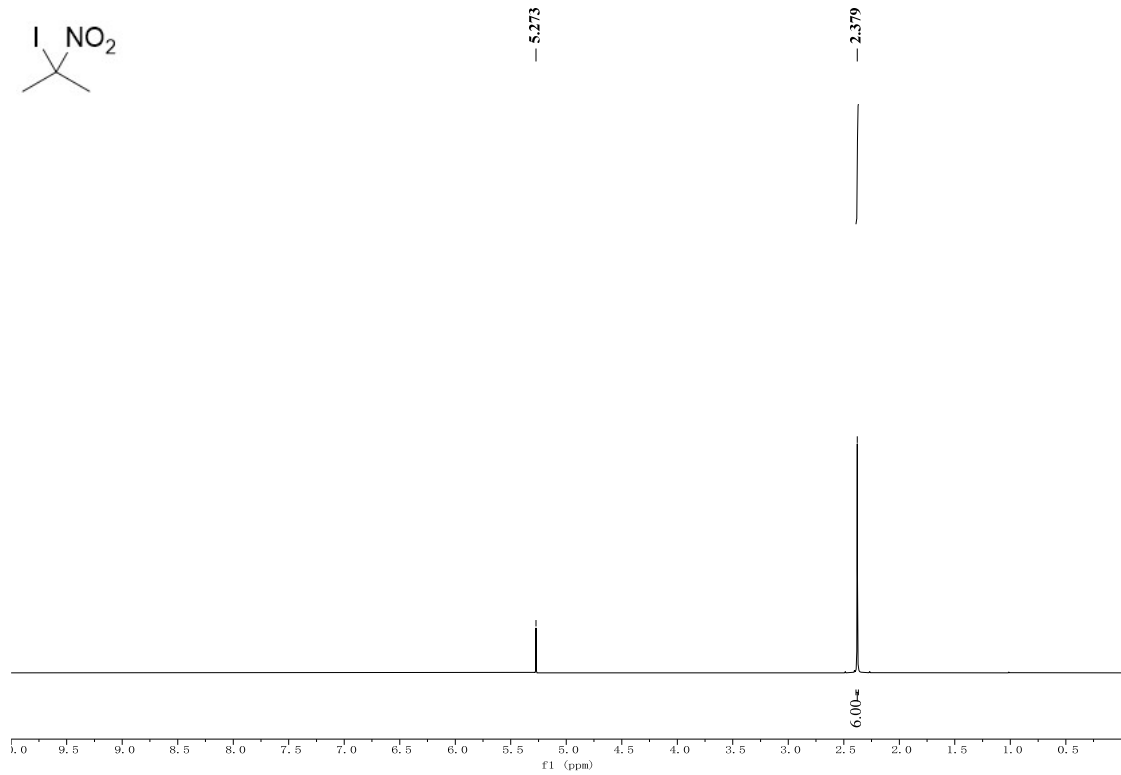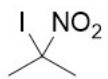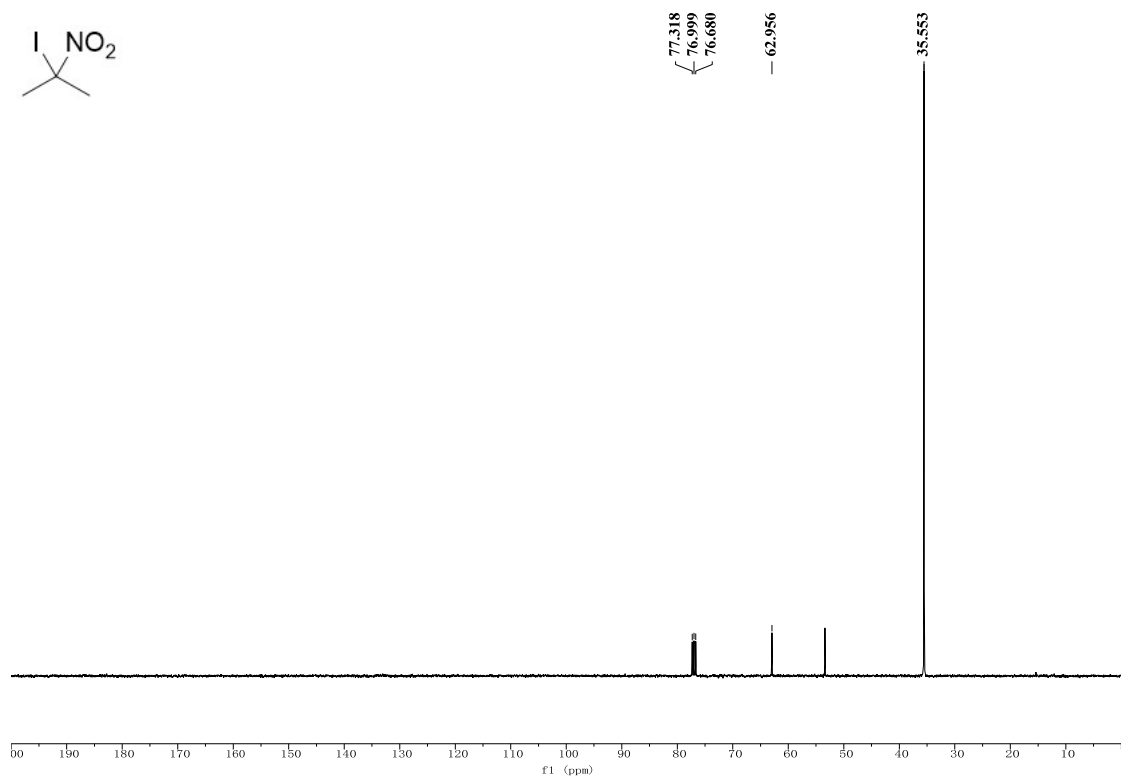

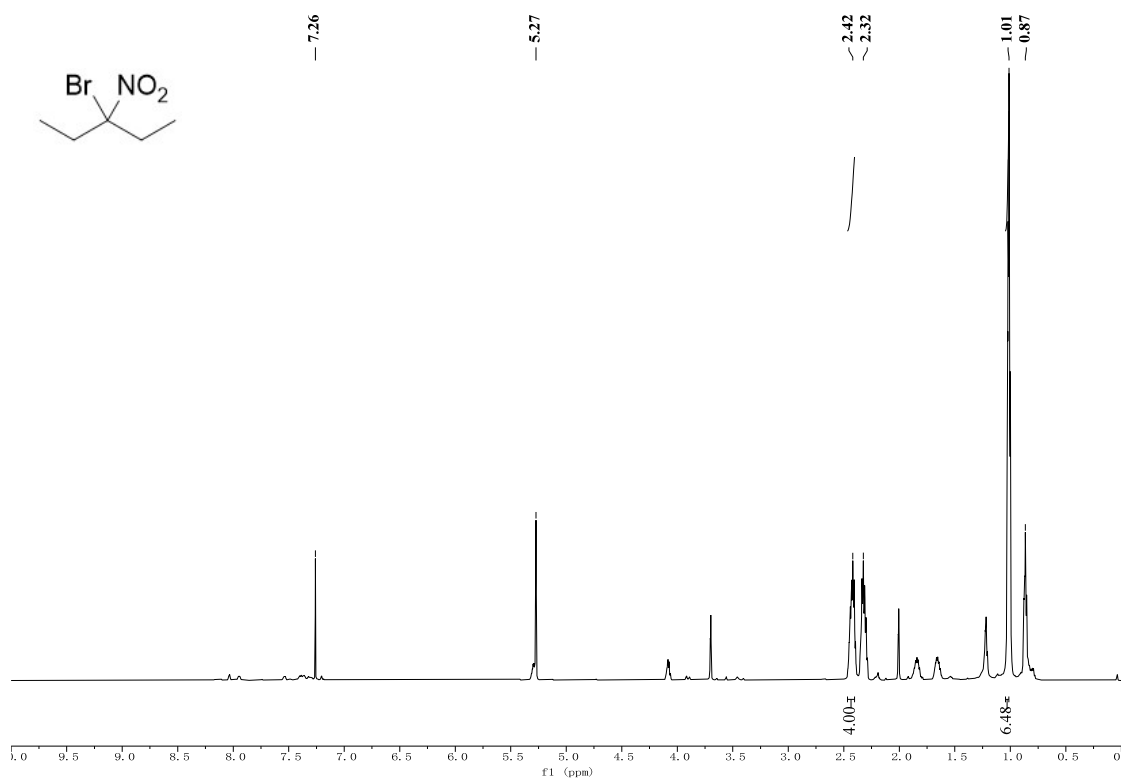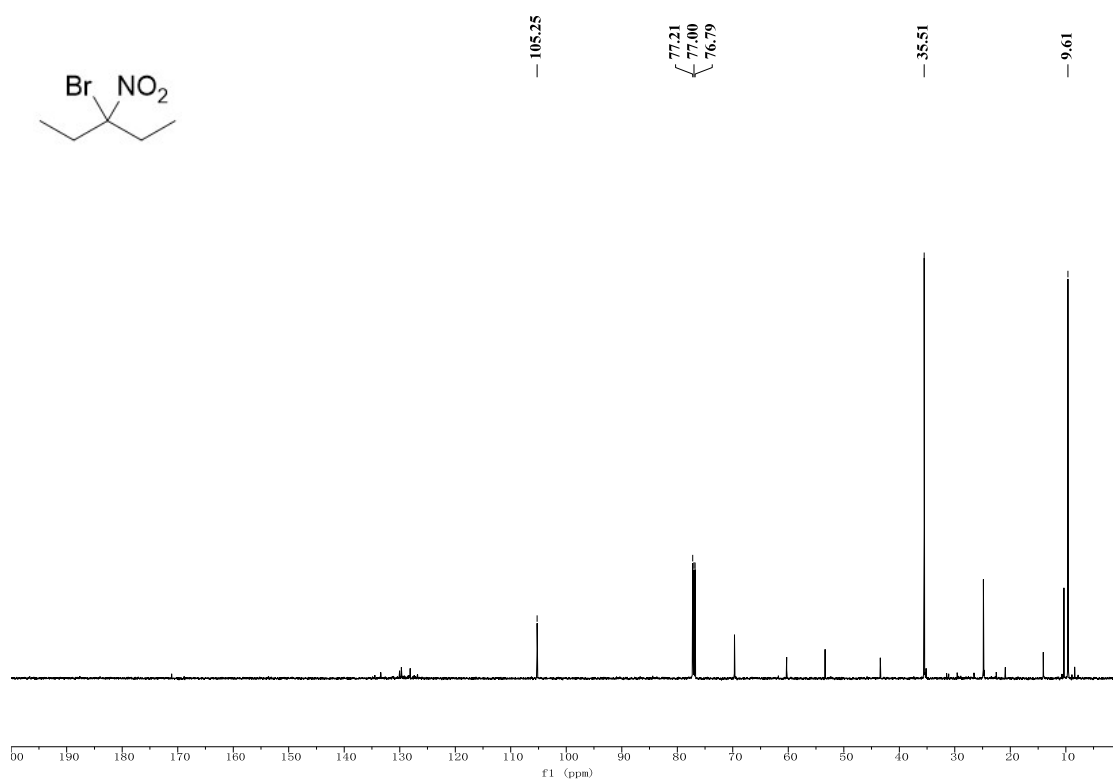

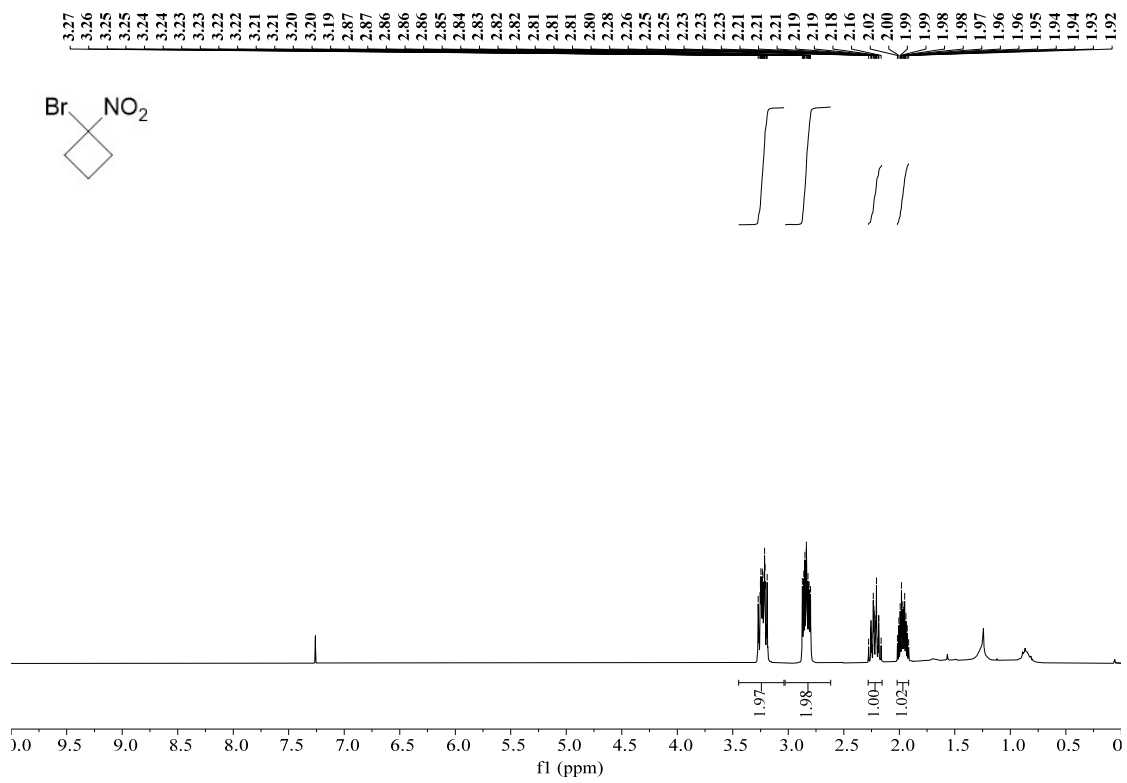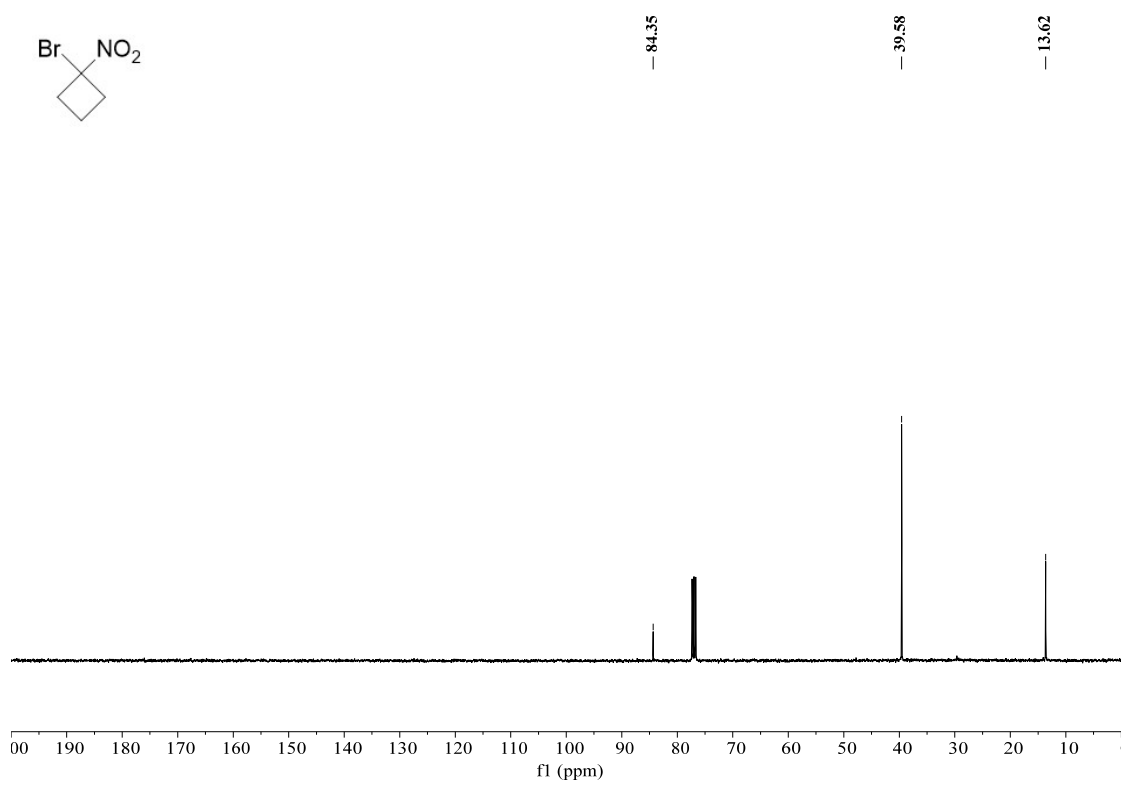

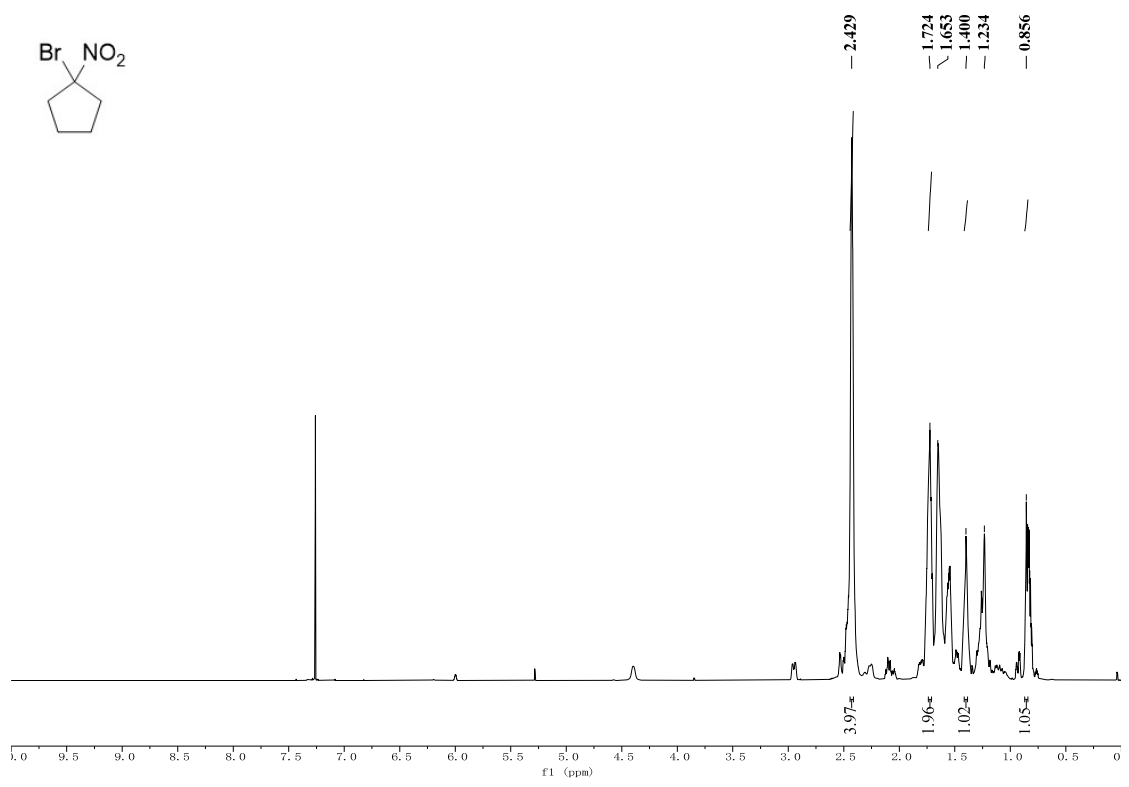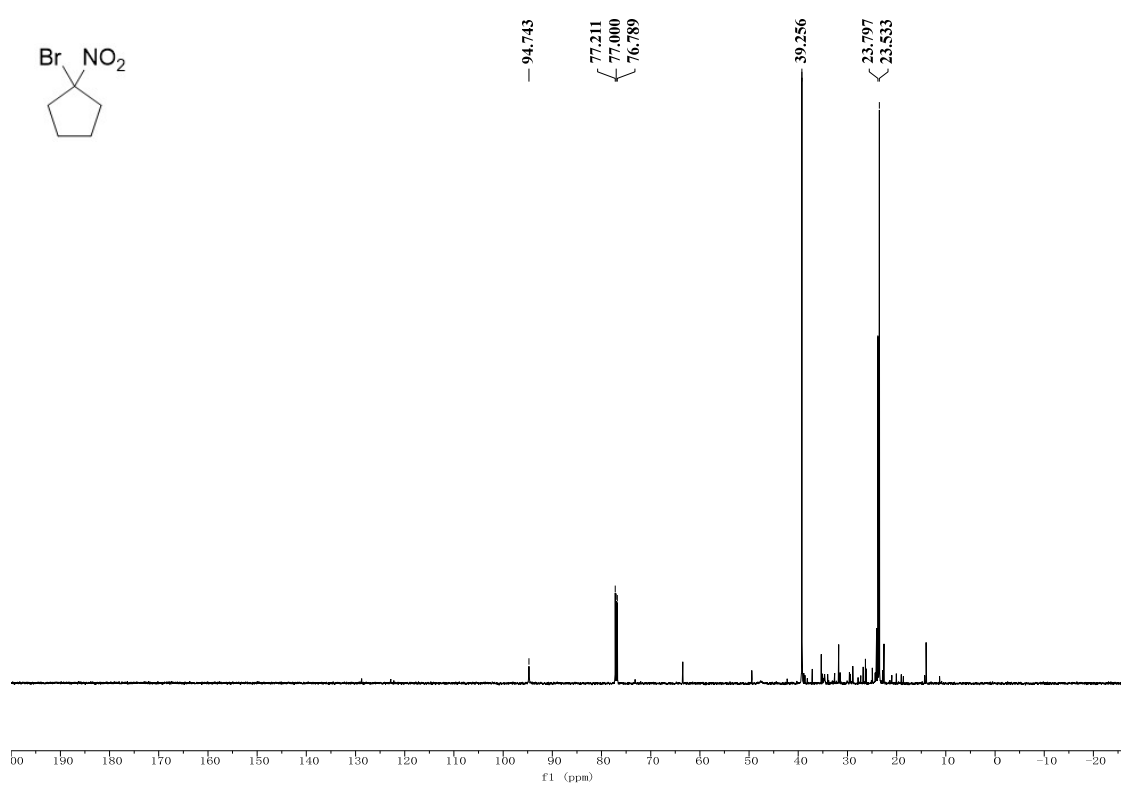

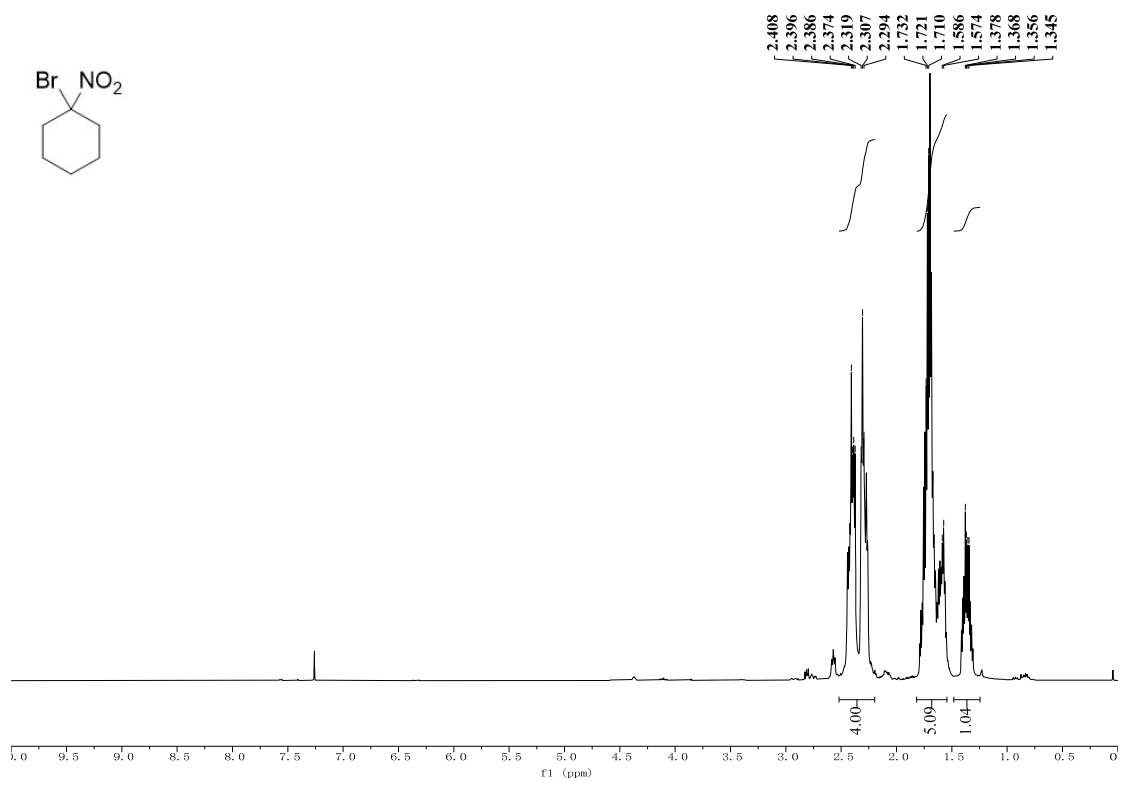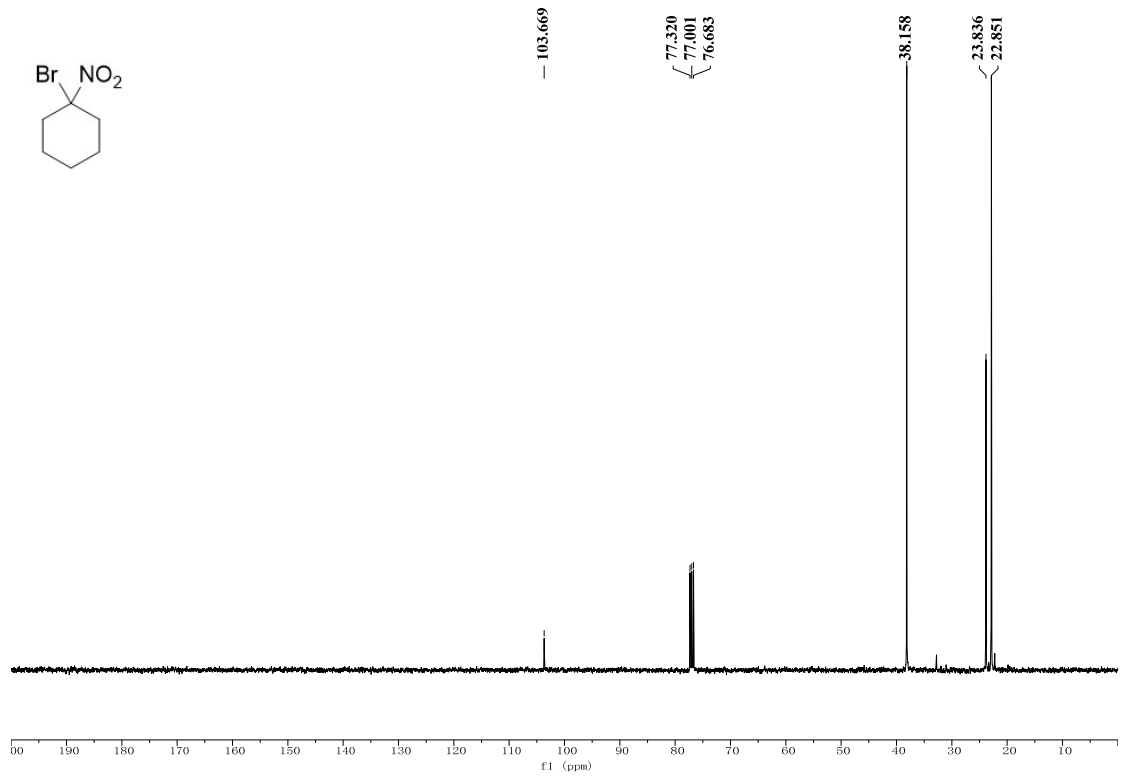

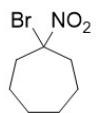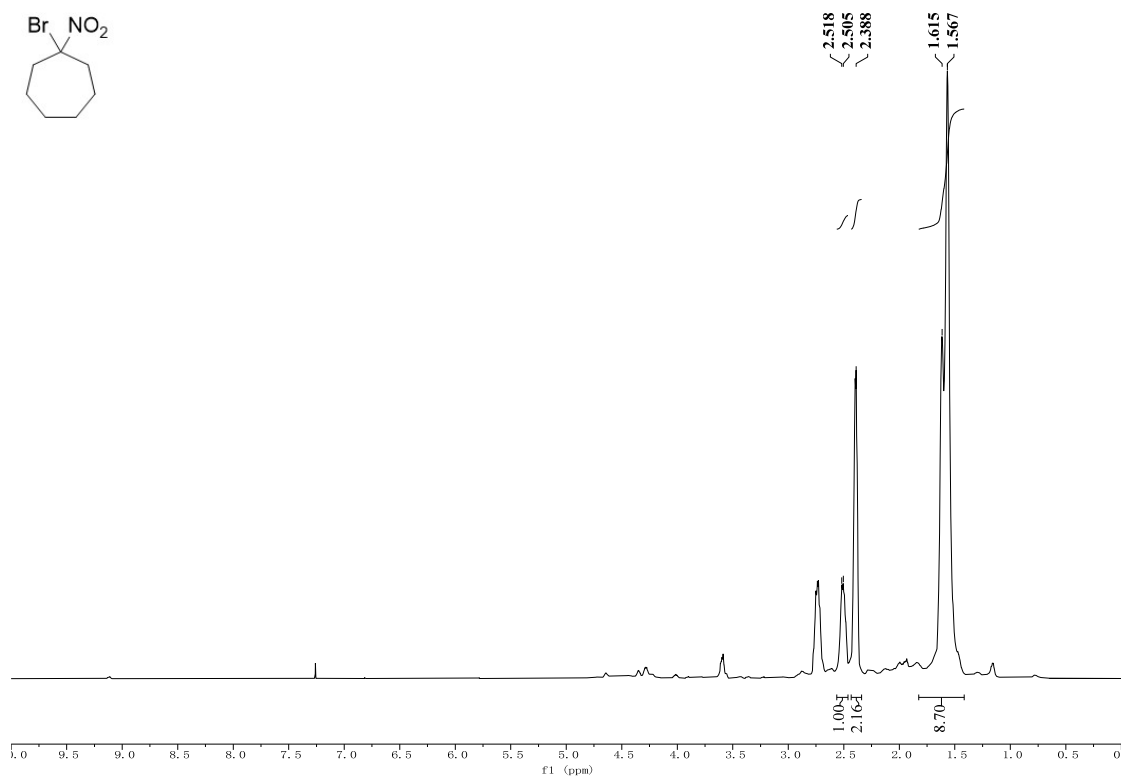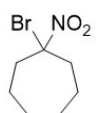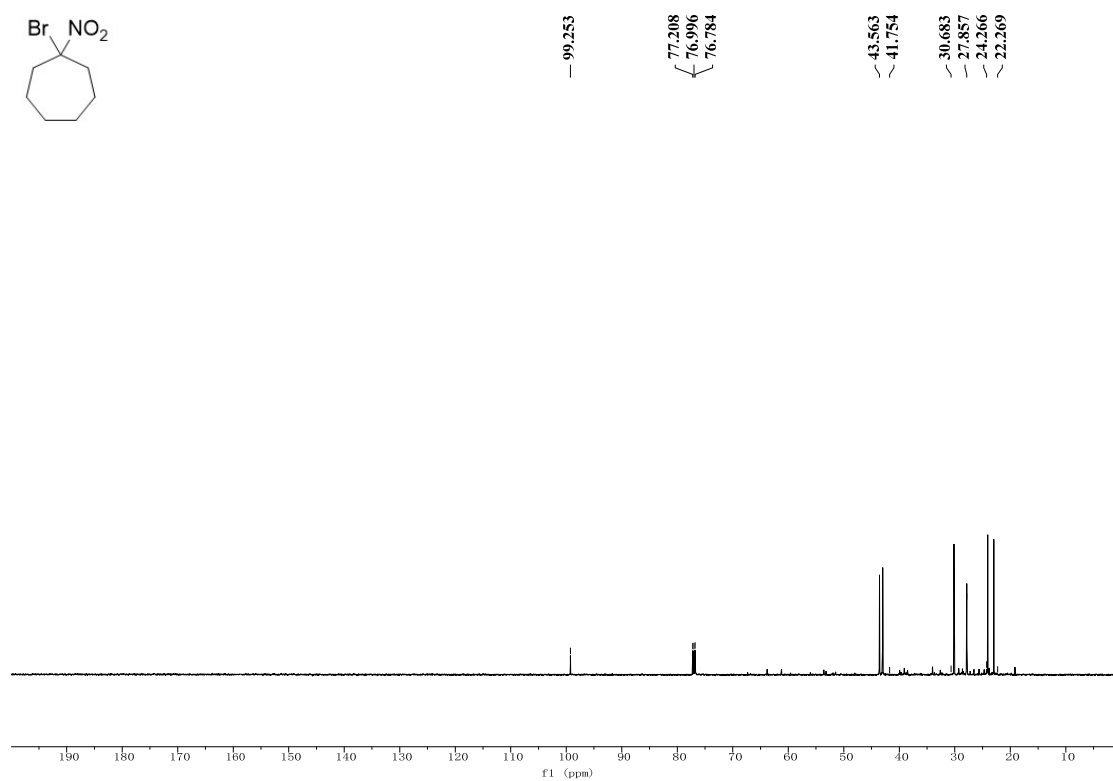

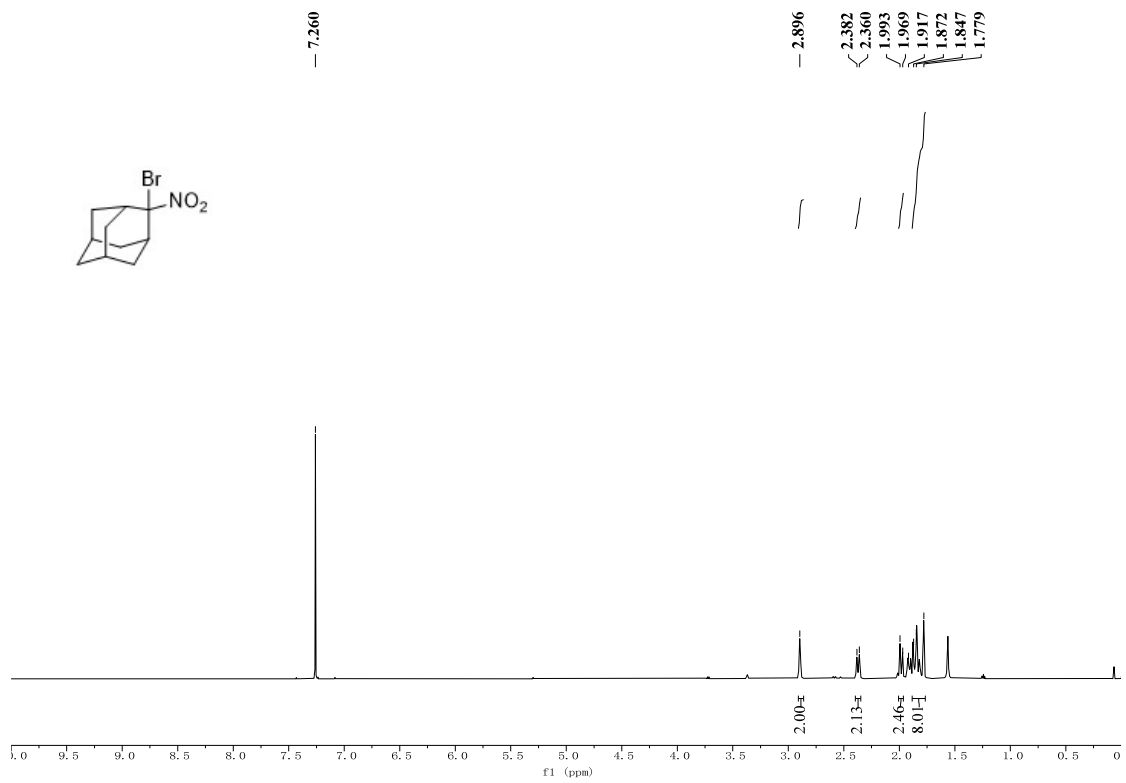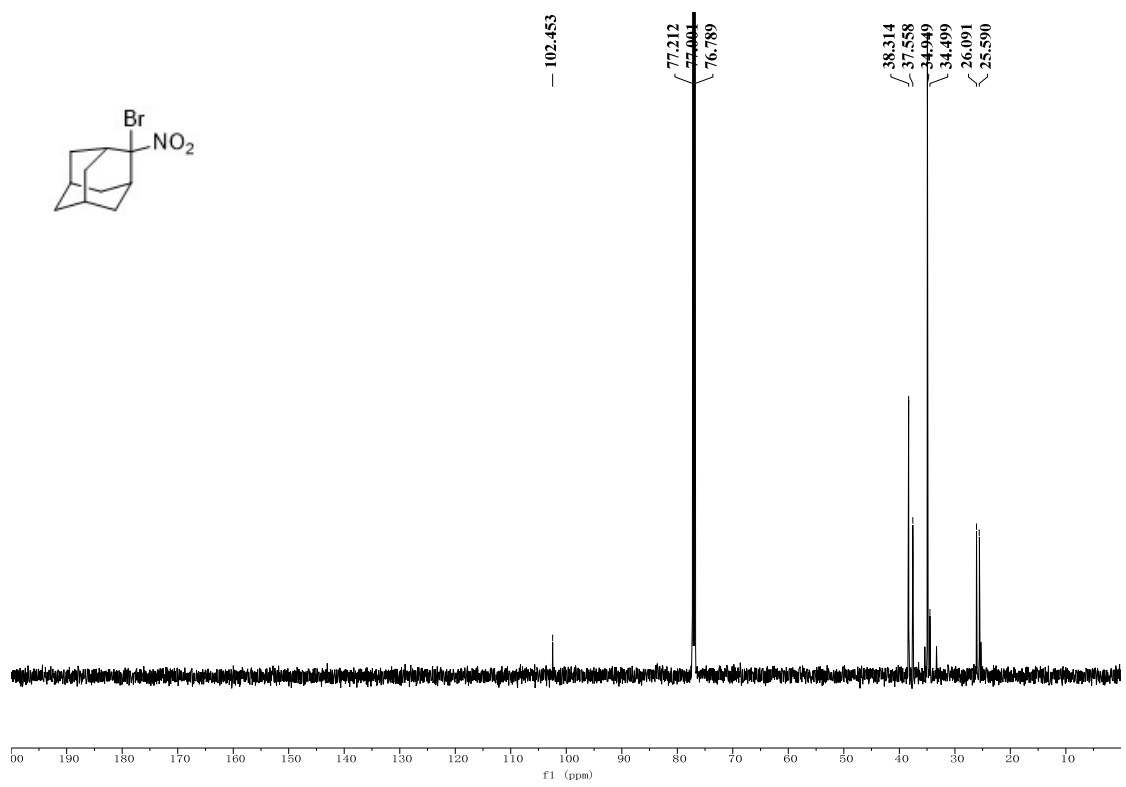

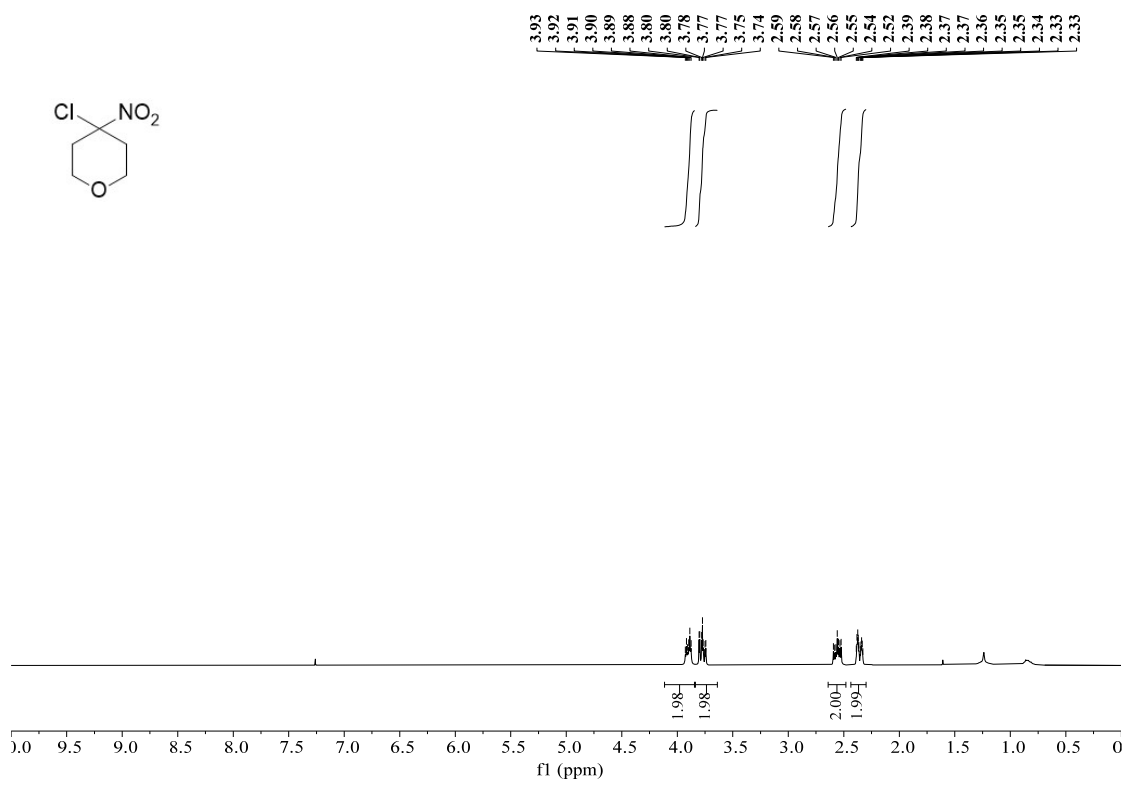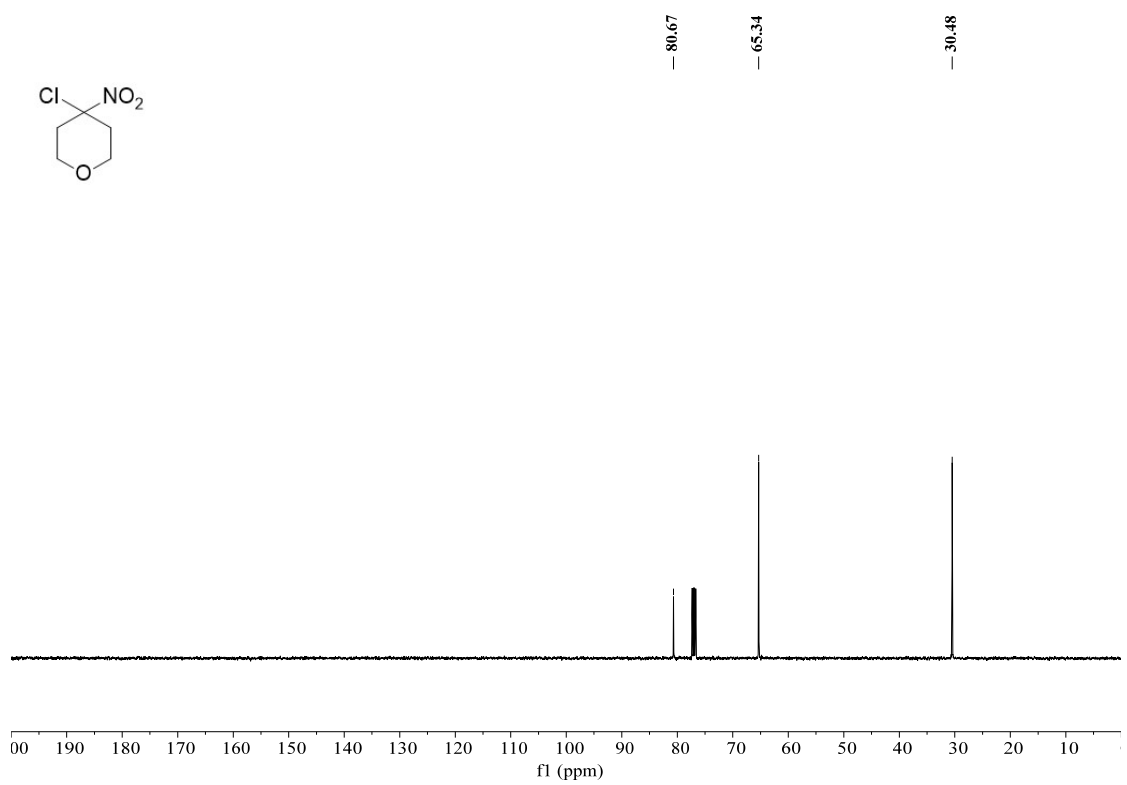



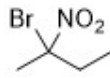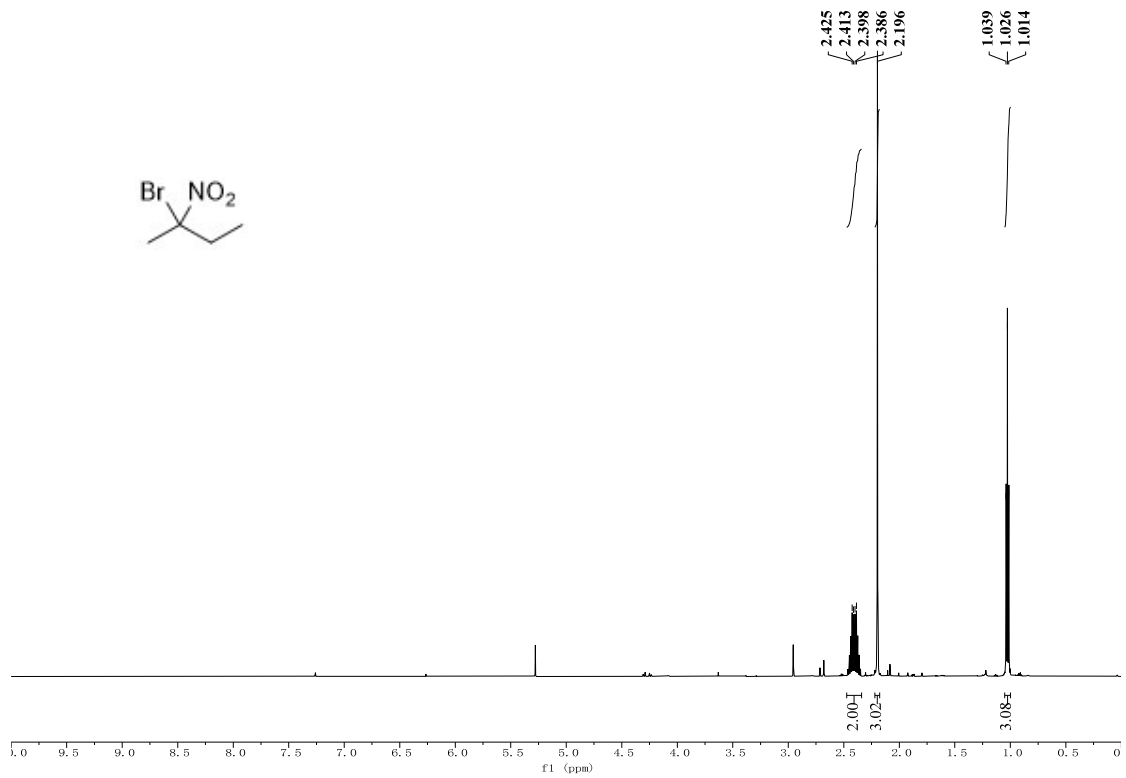

96.093

77.319  
77.001  
76.684

37.391

29.452

9.885

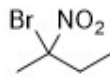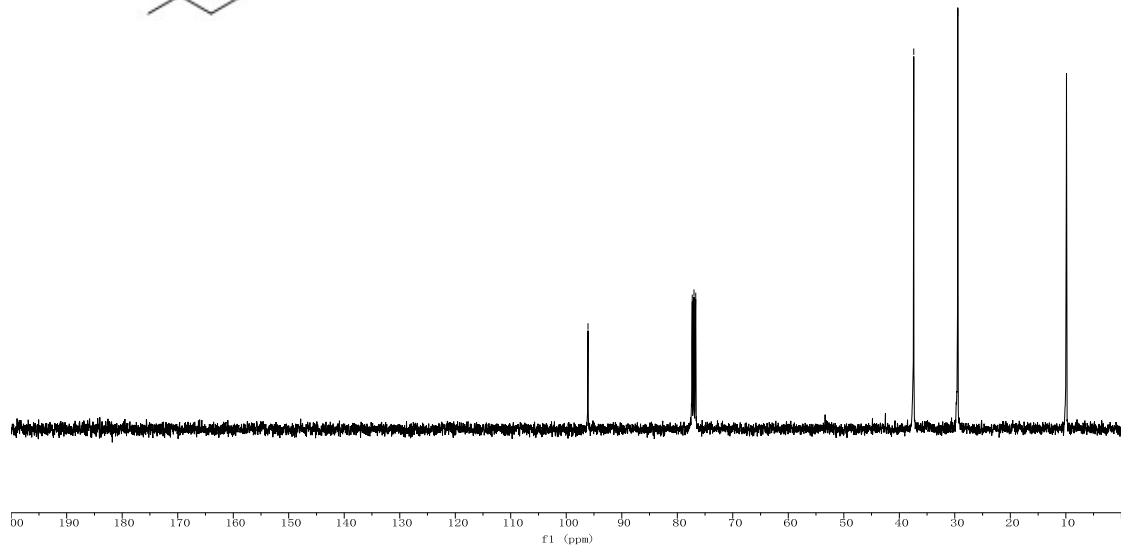

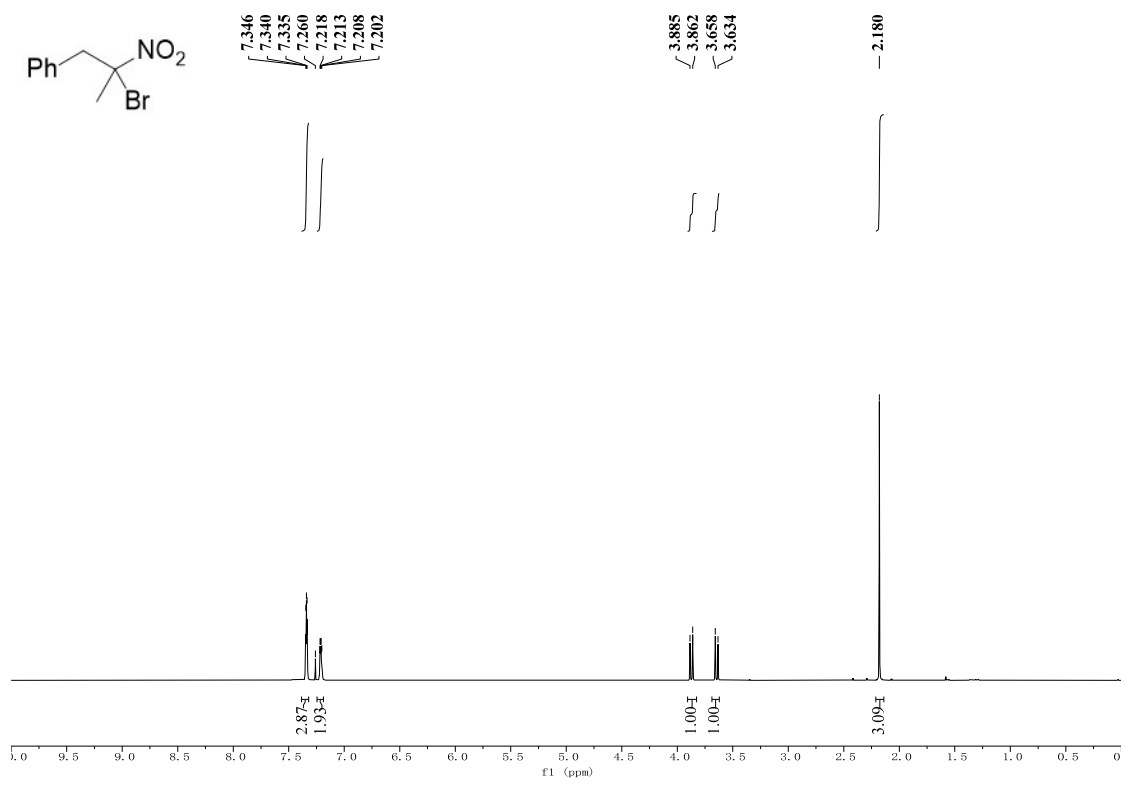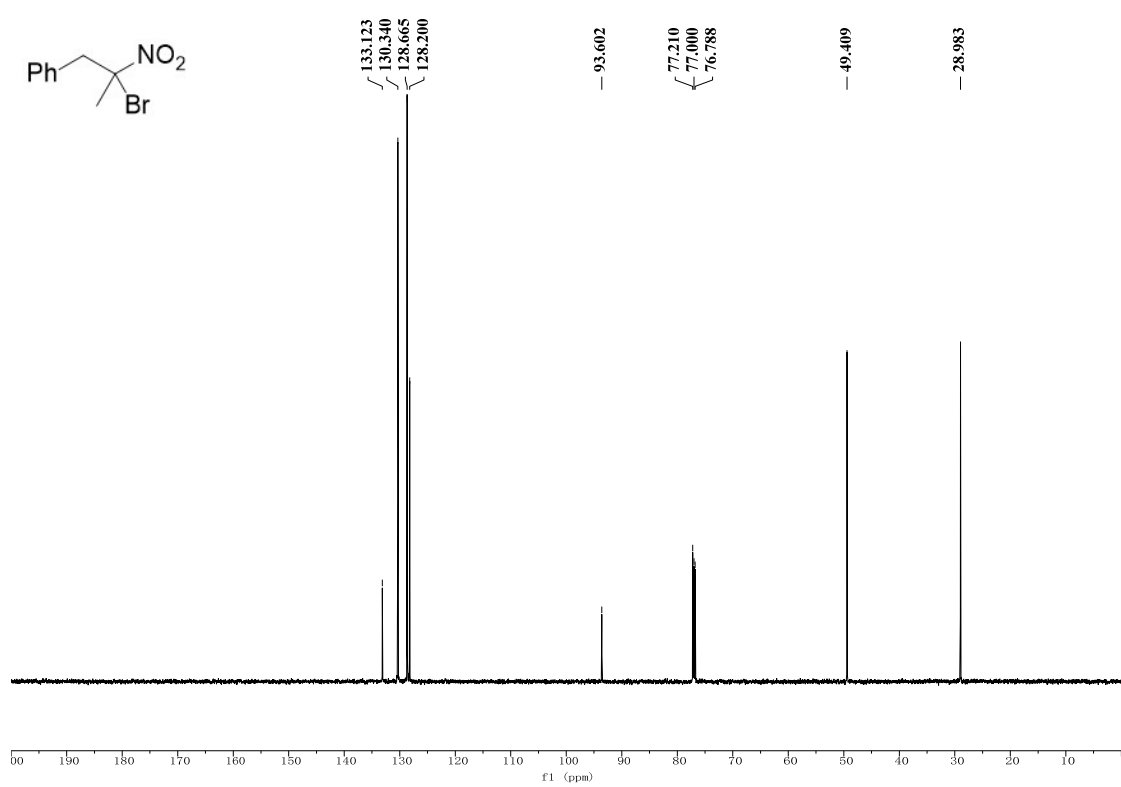

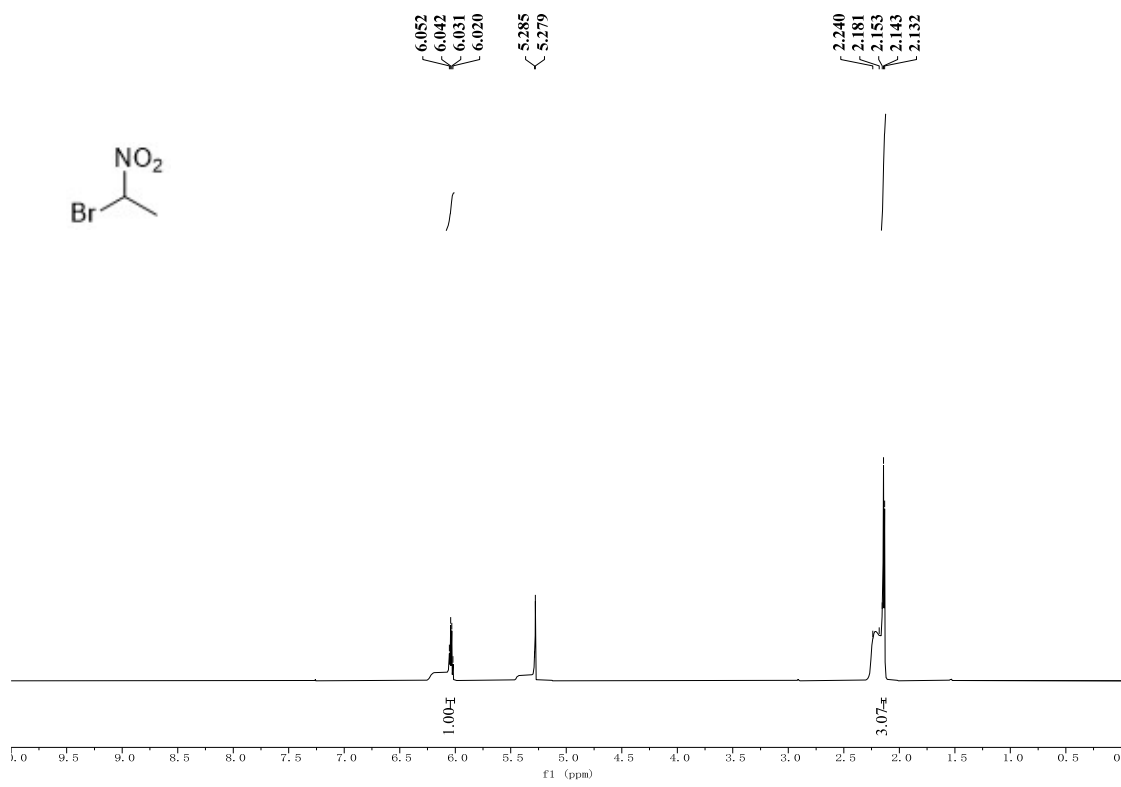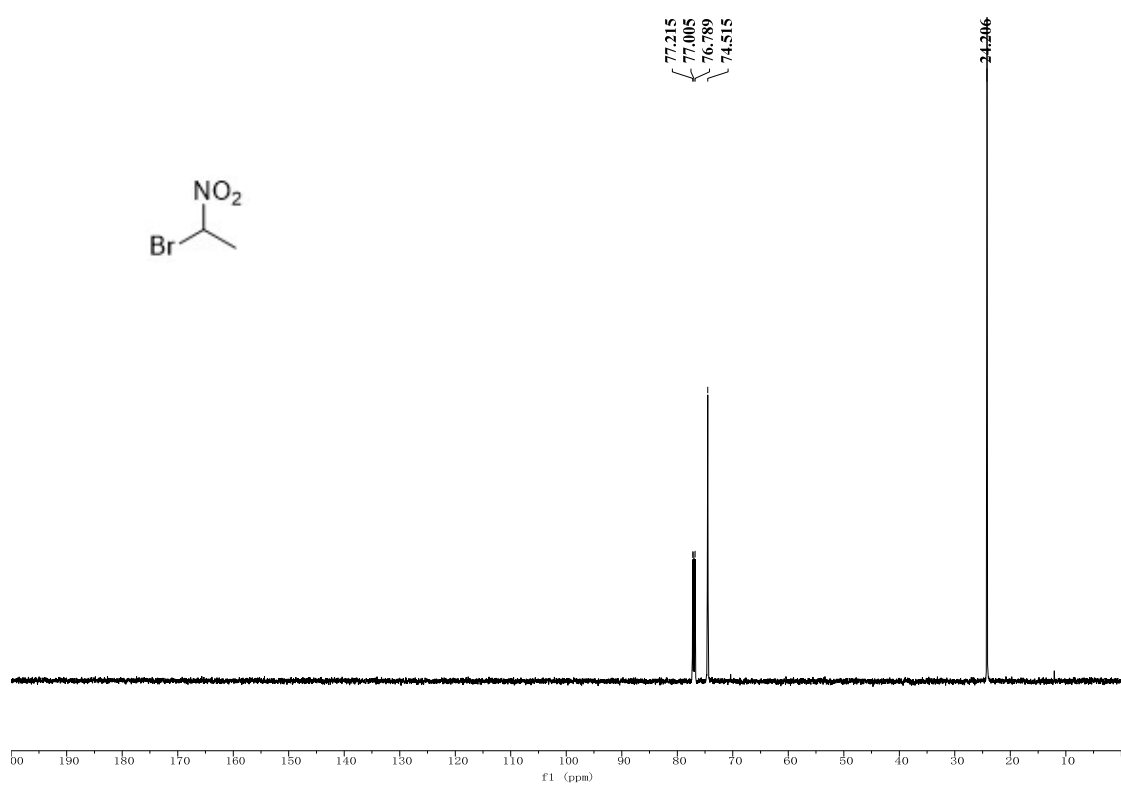

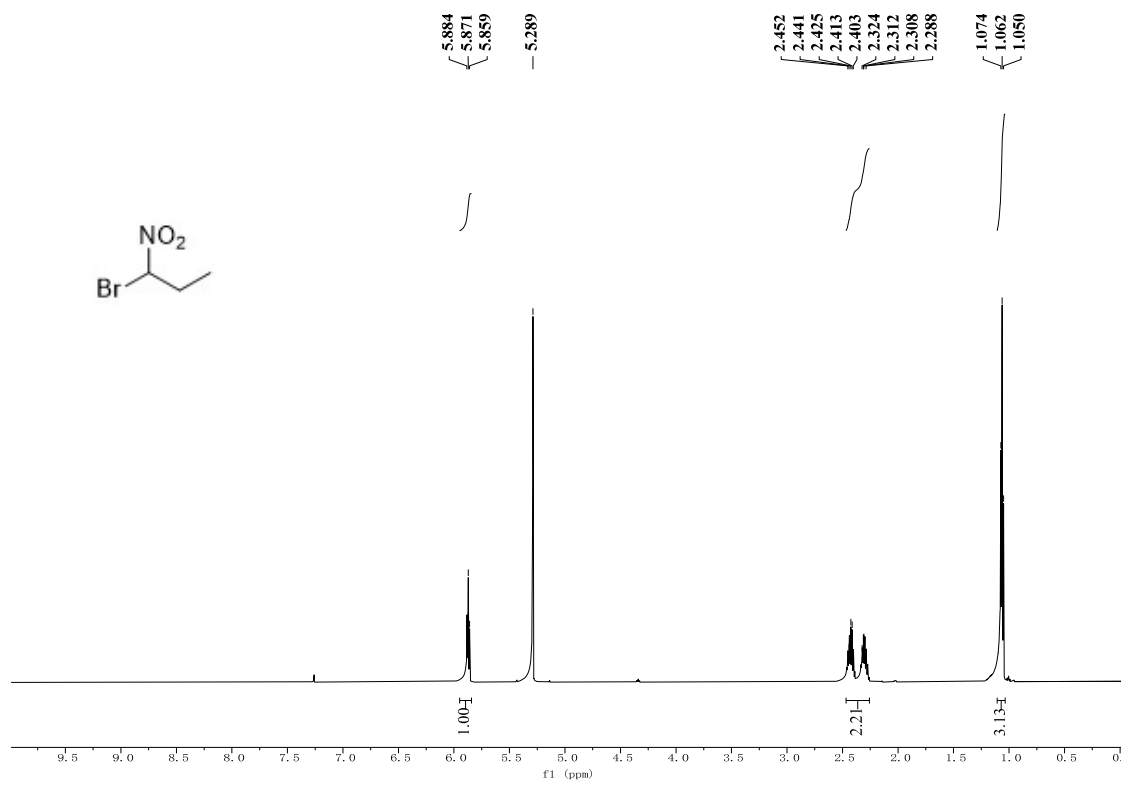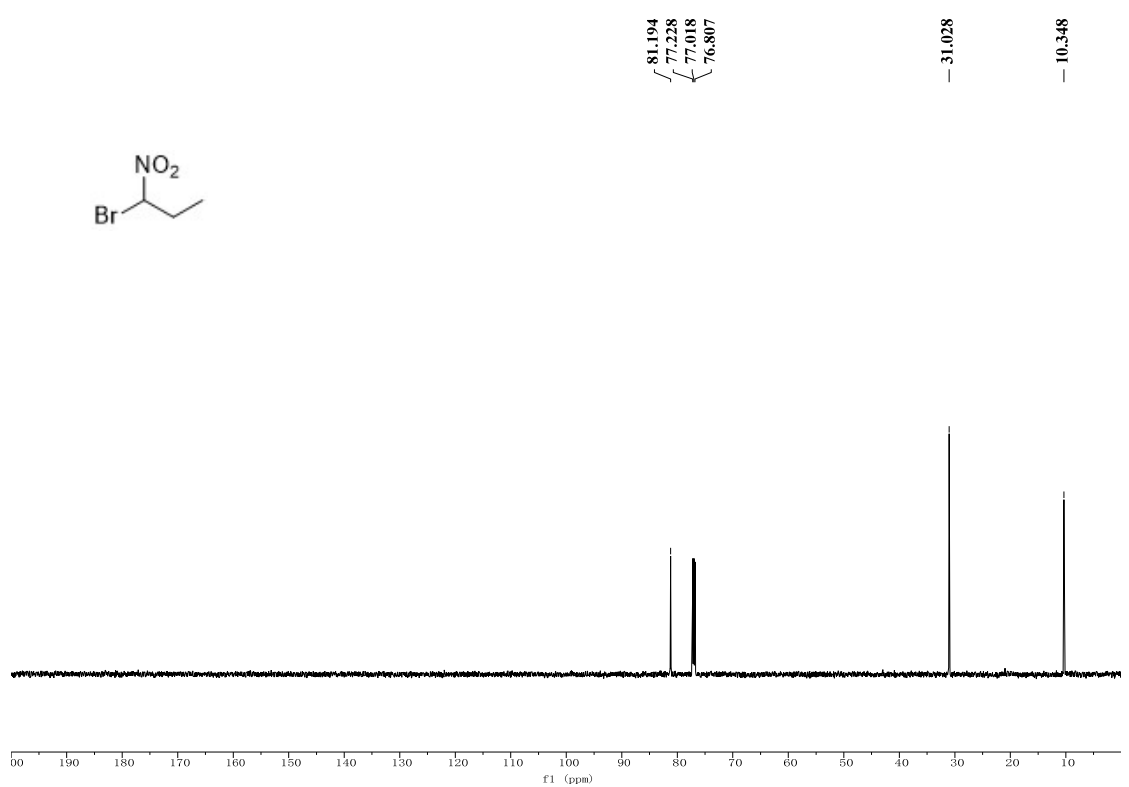

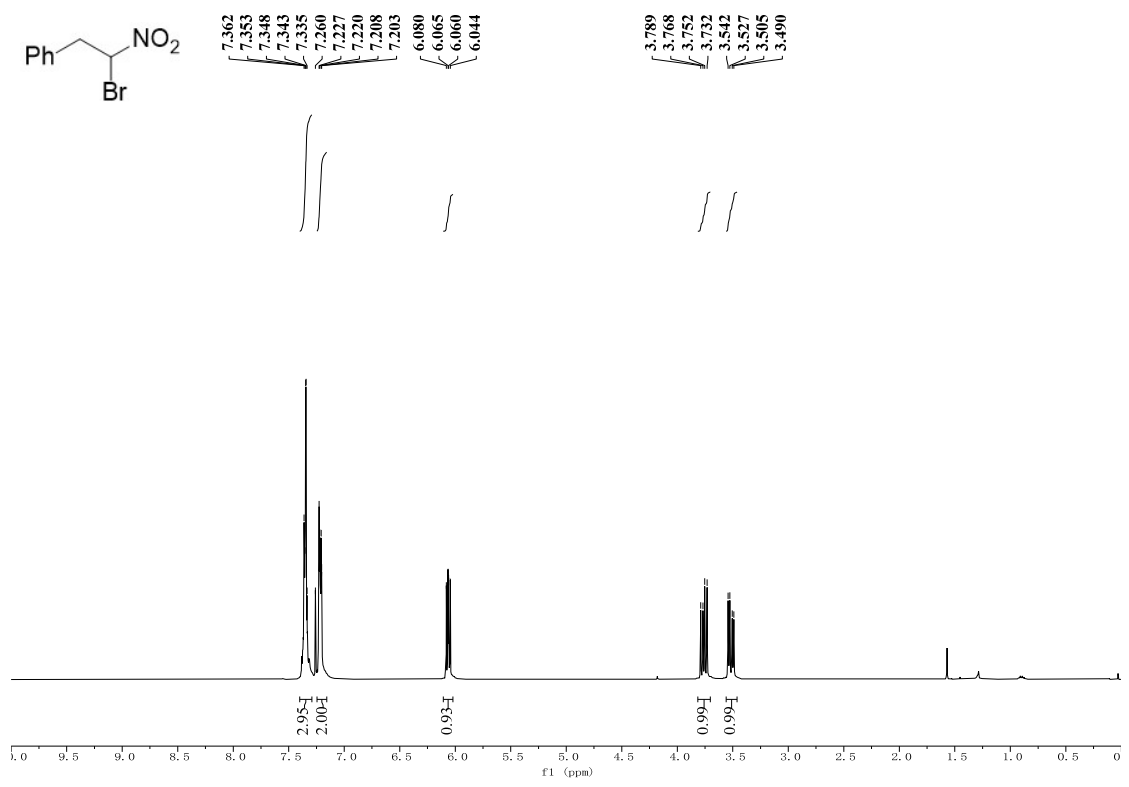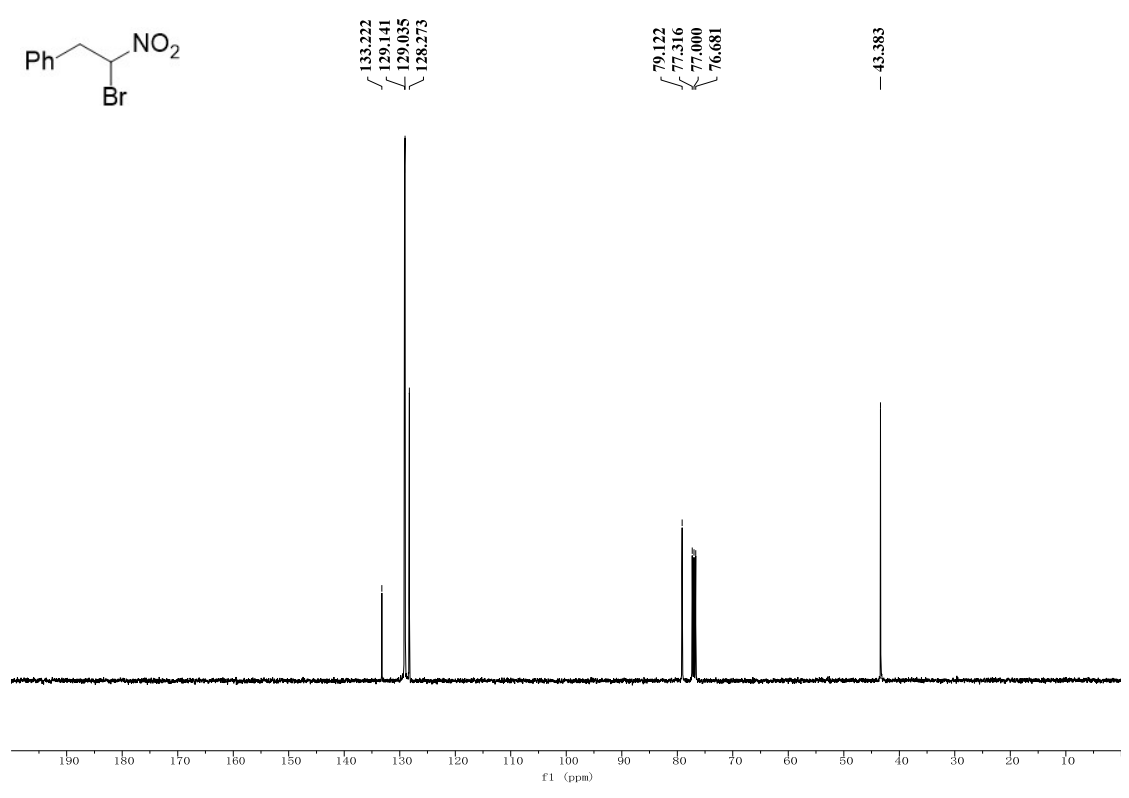

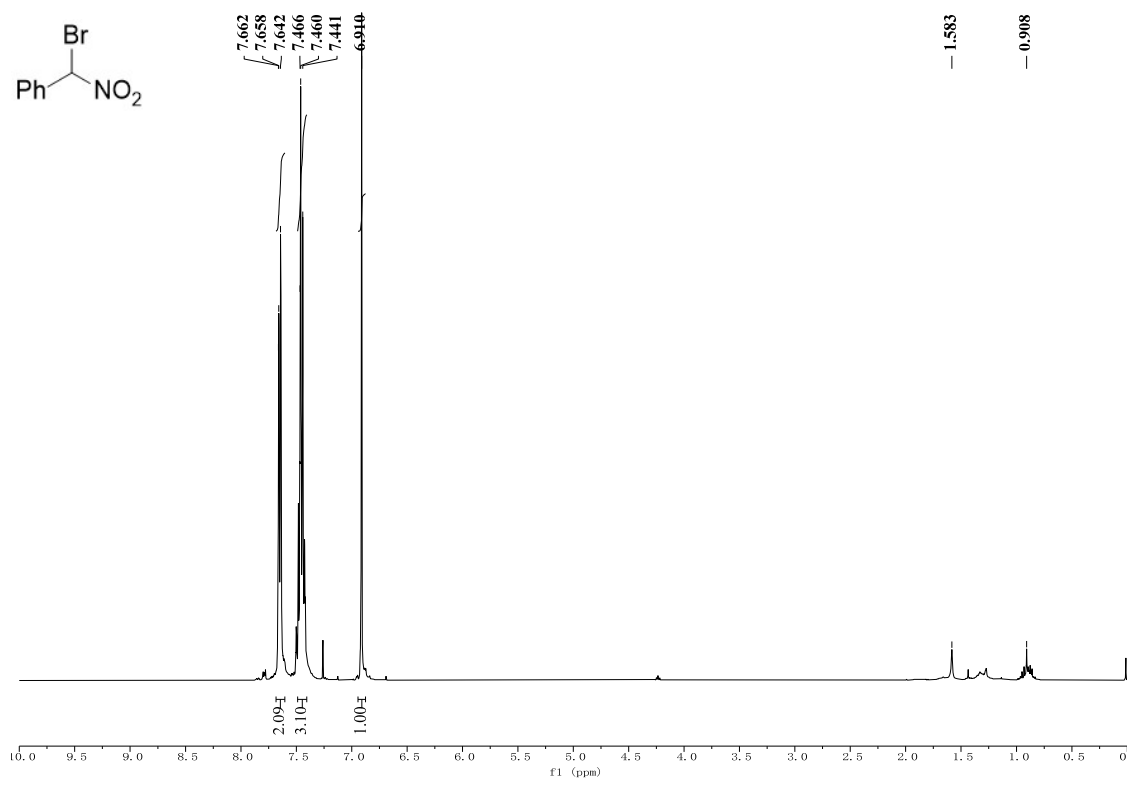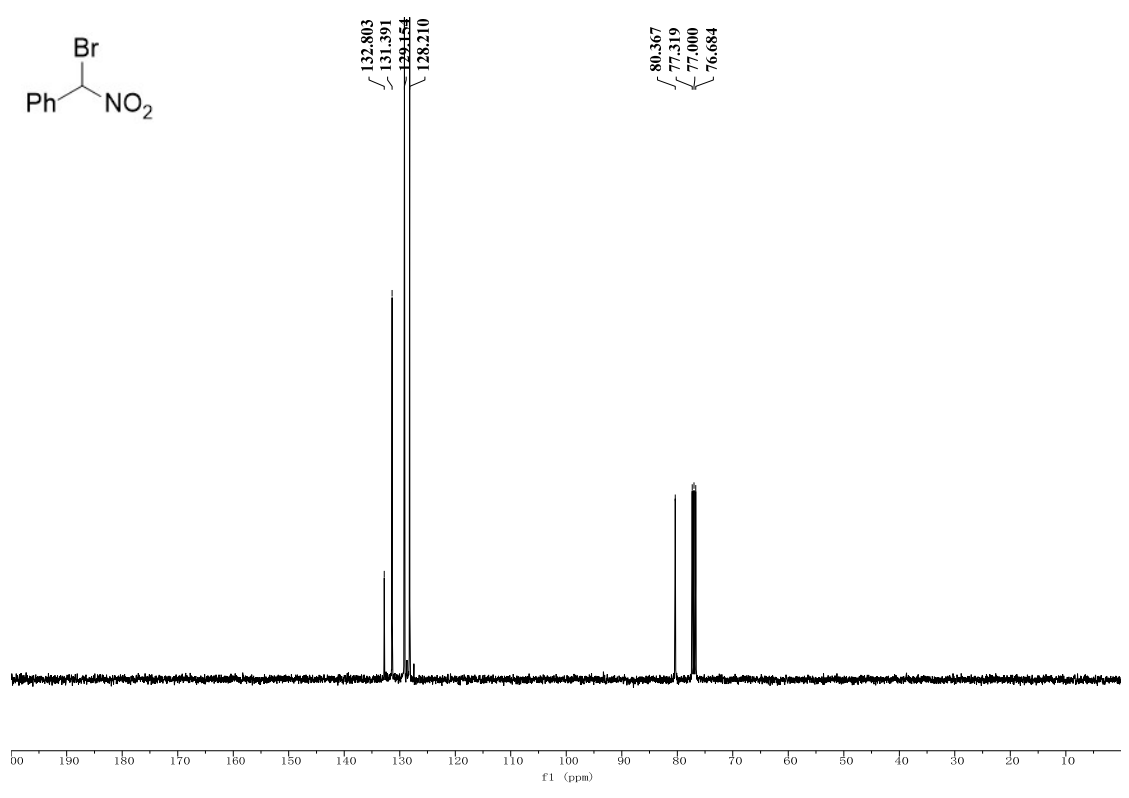

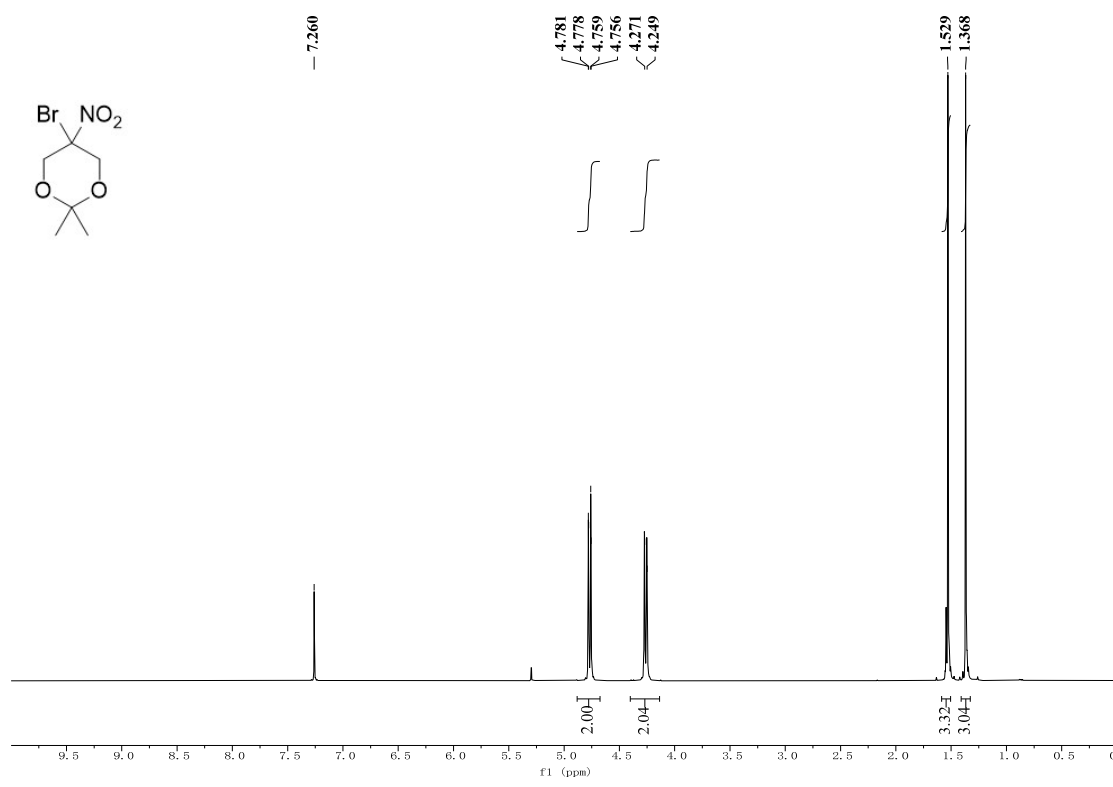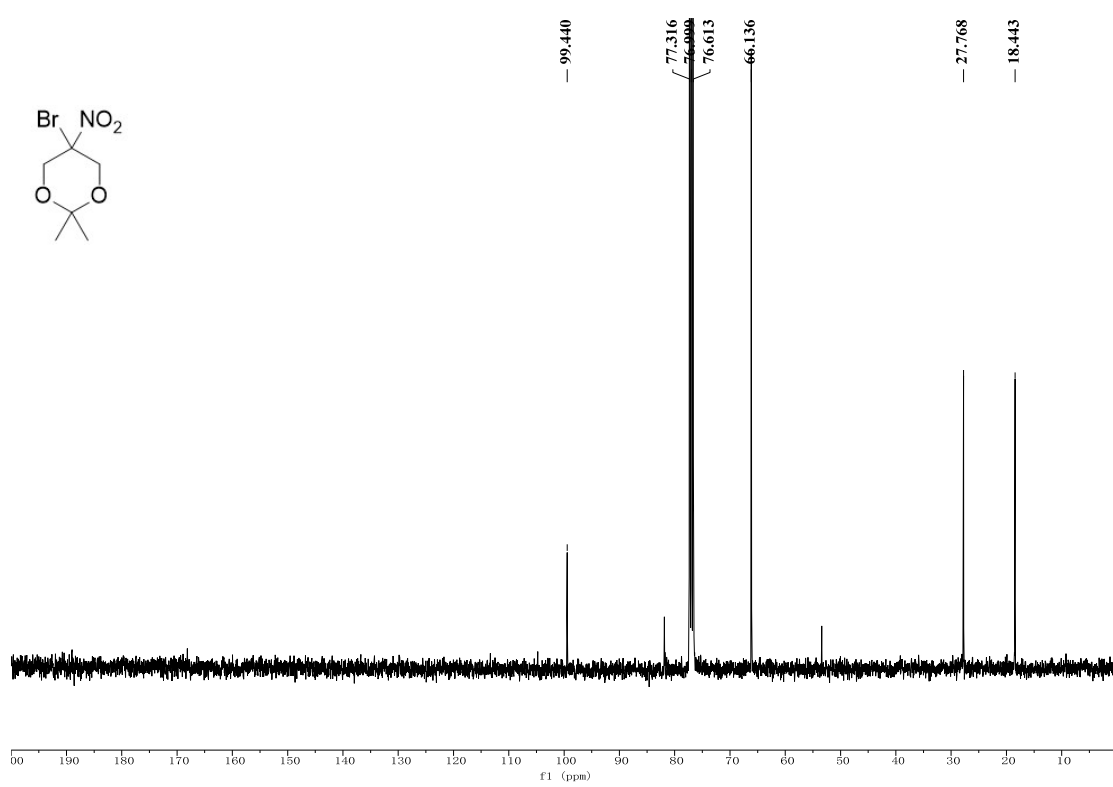

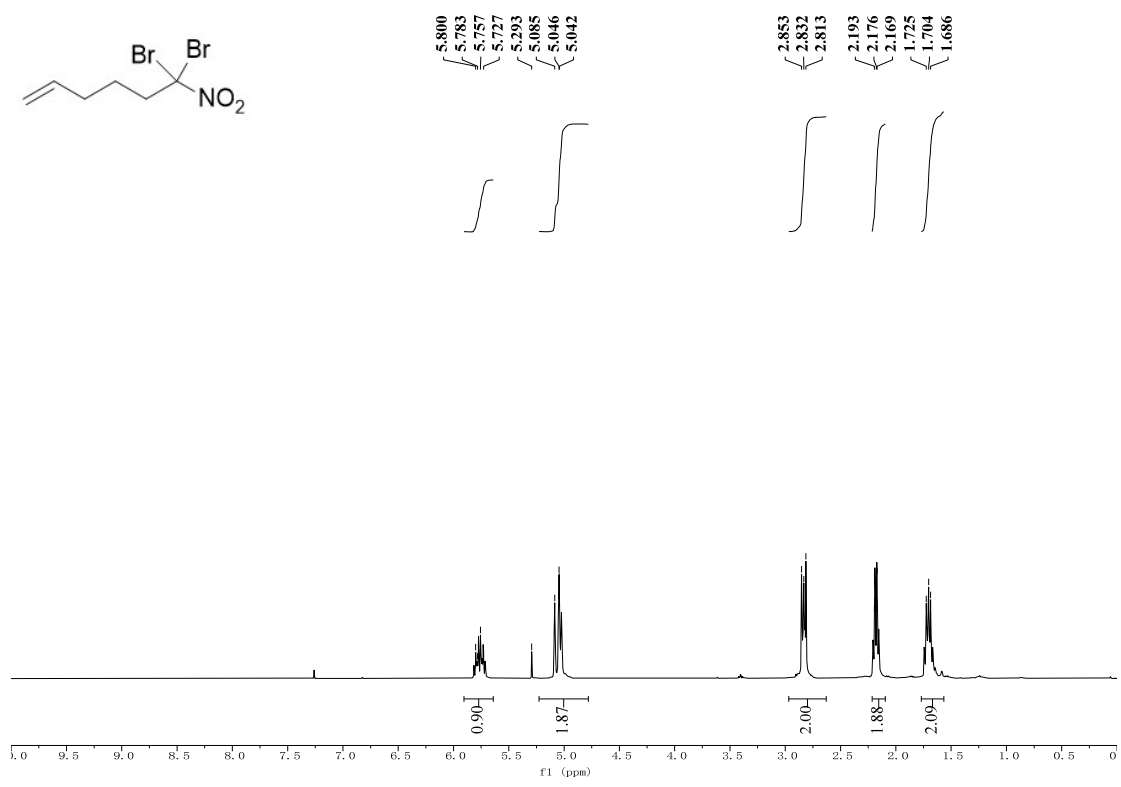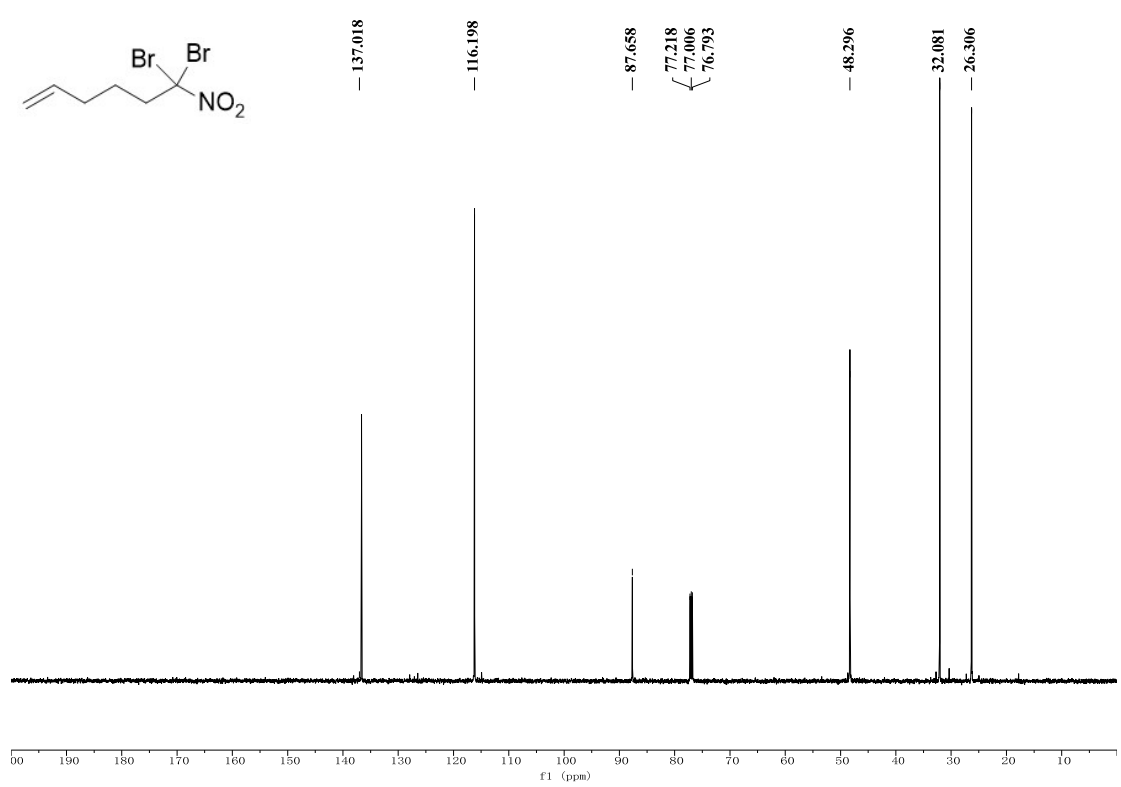



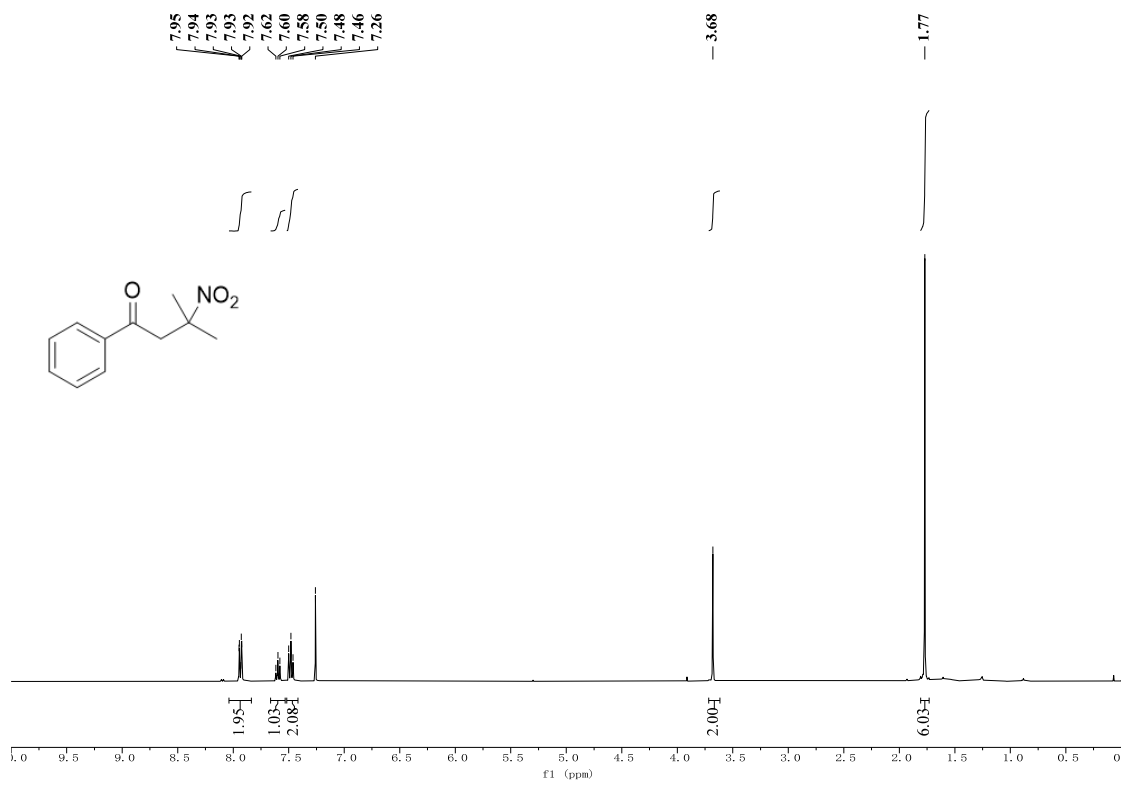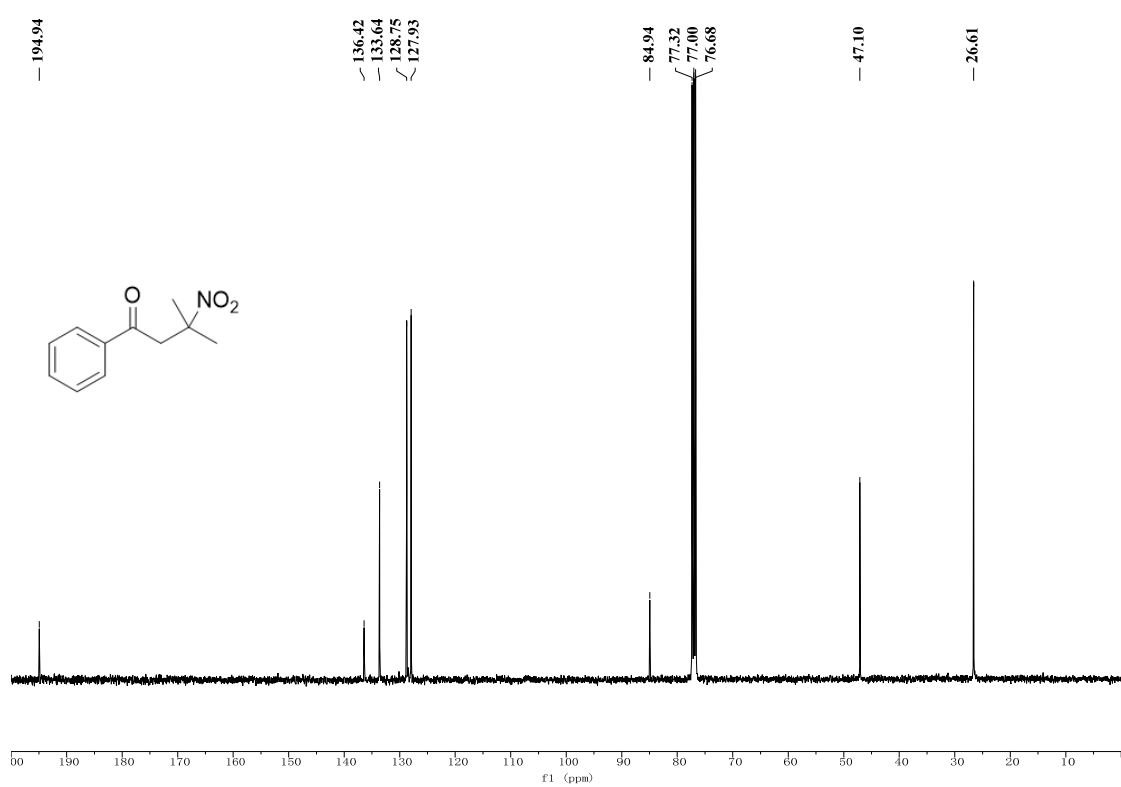

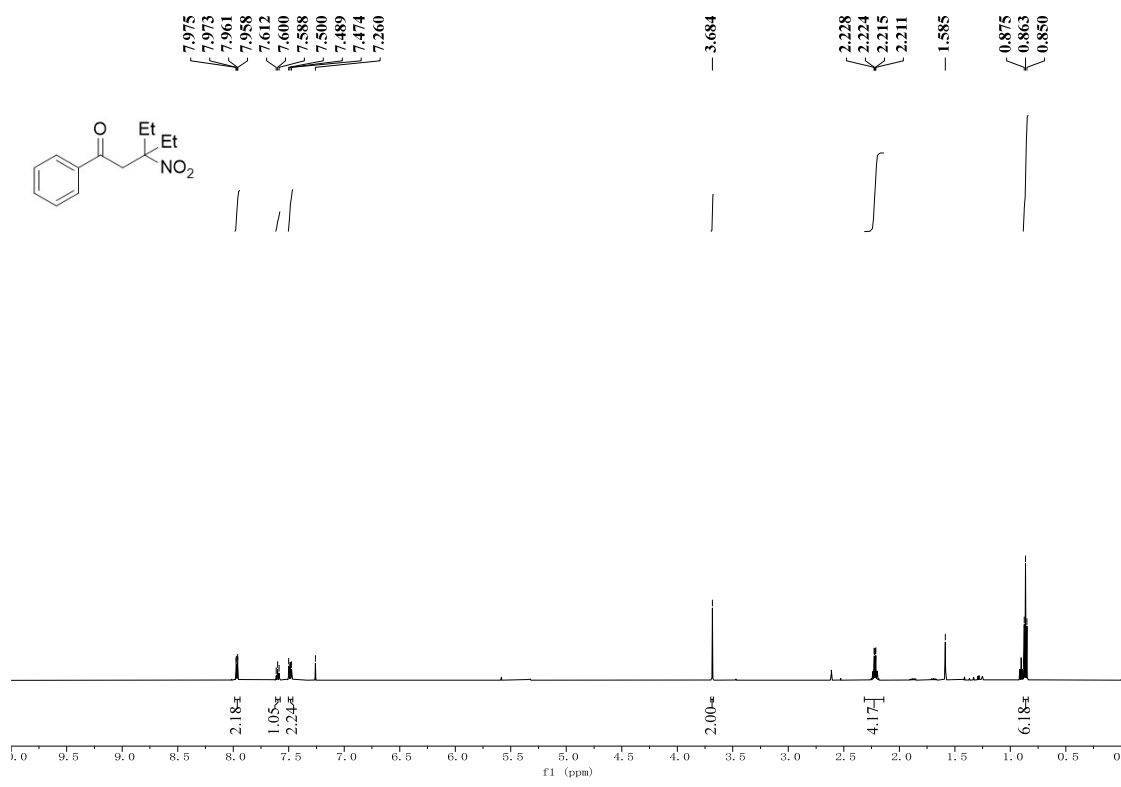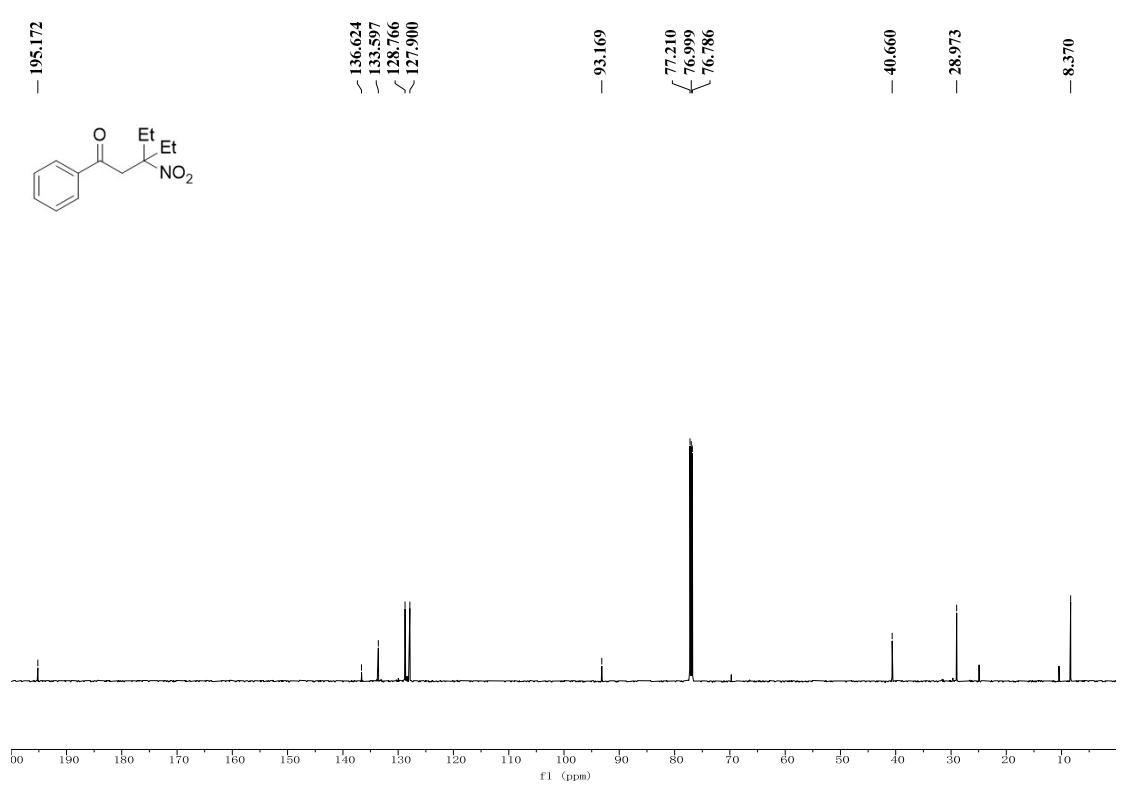

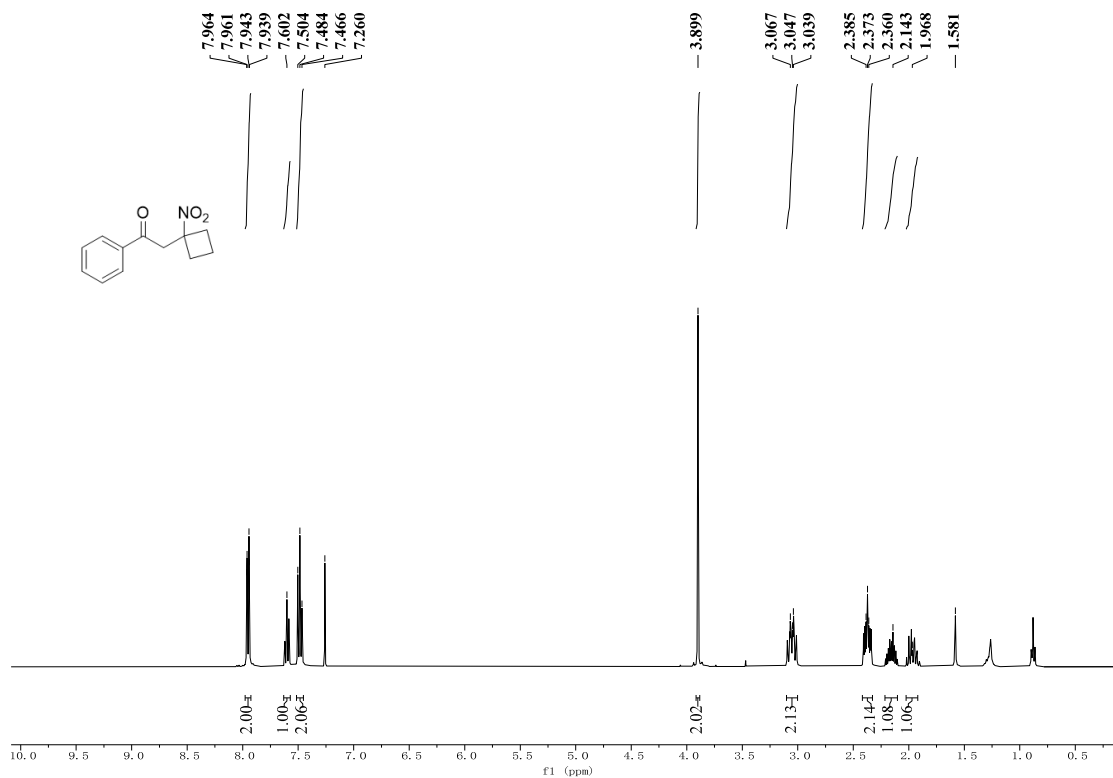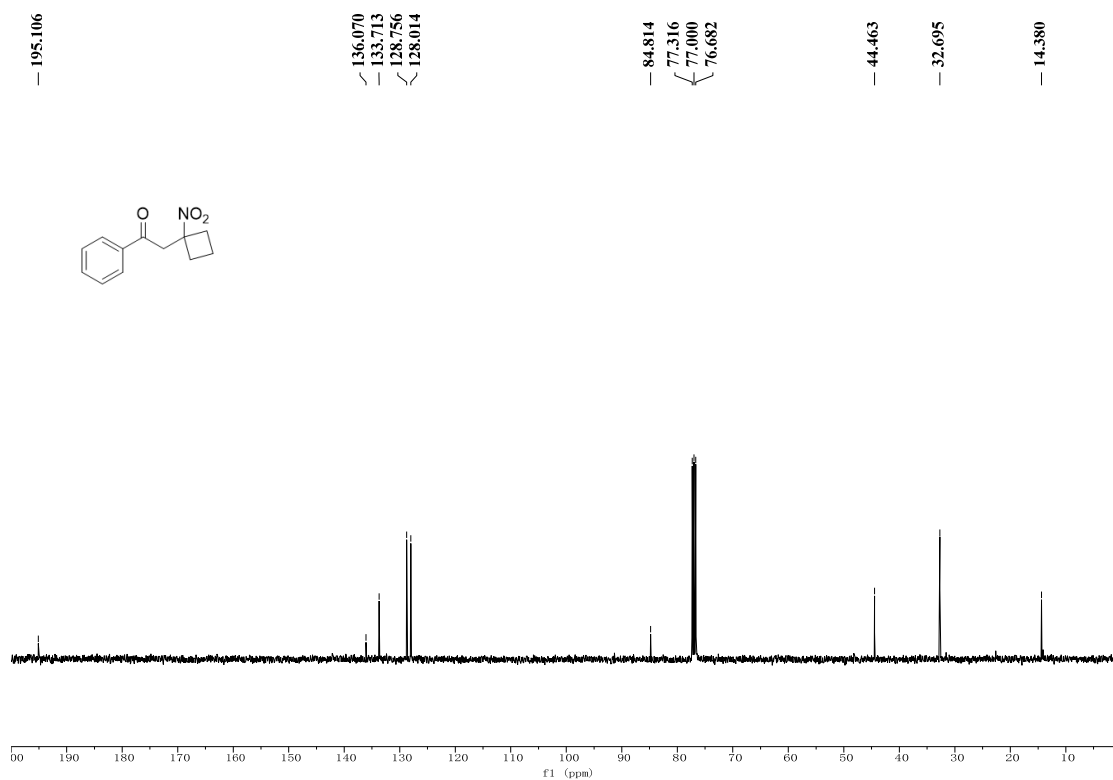

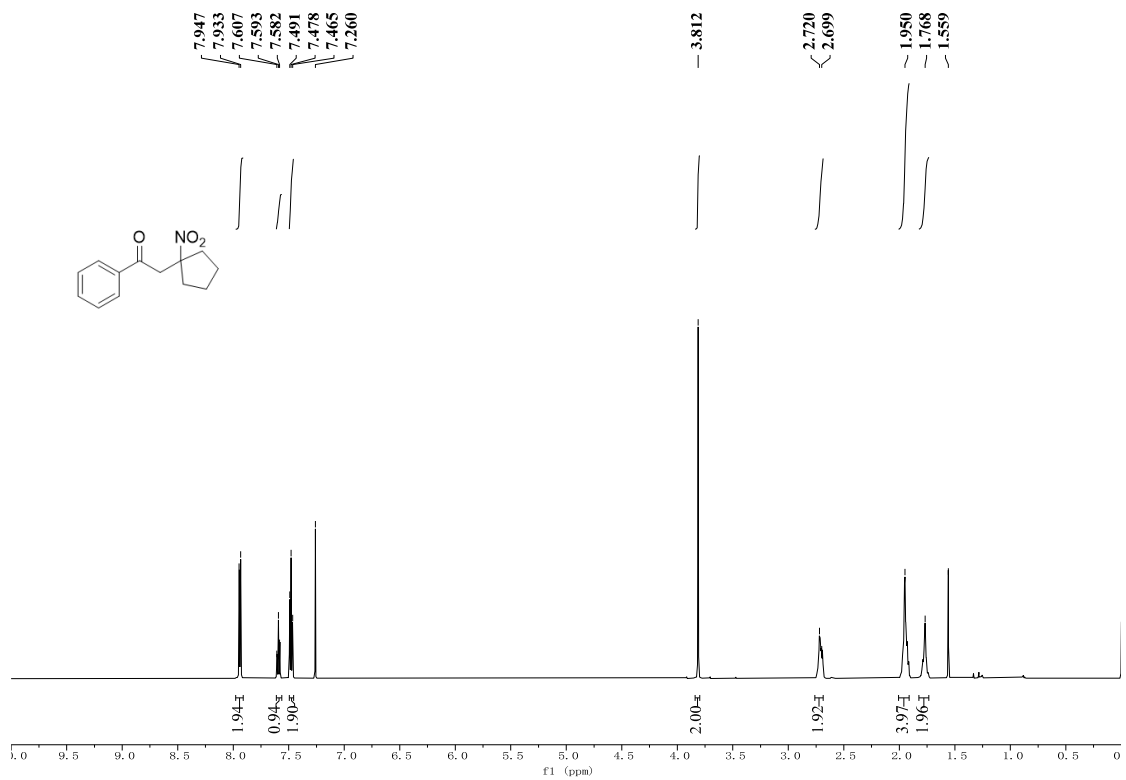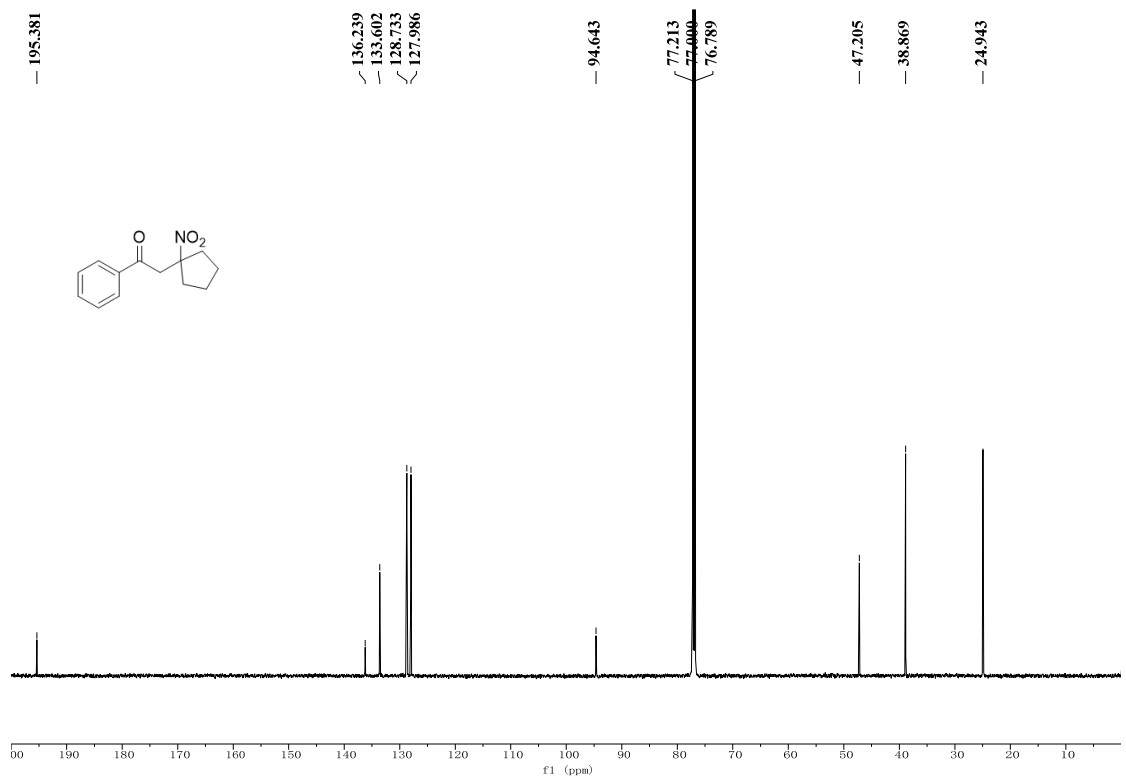

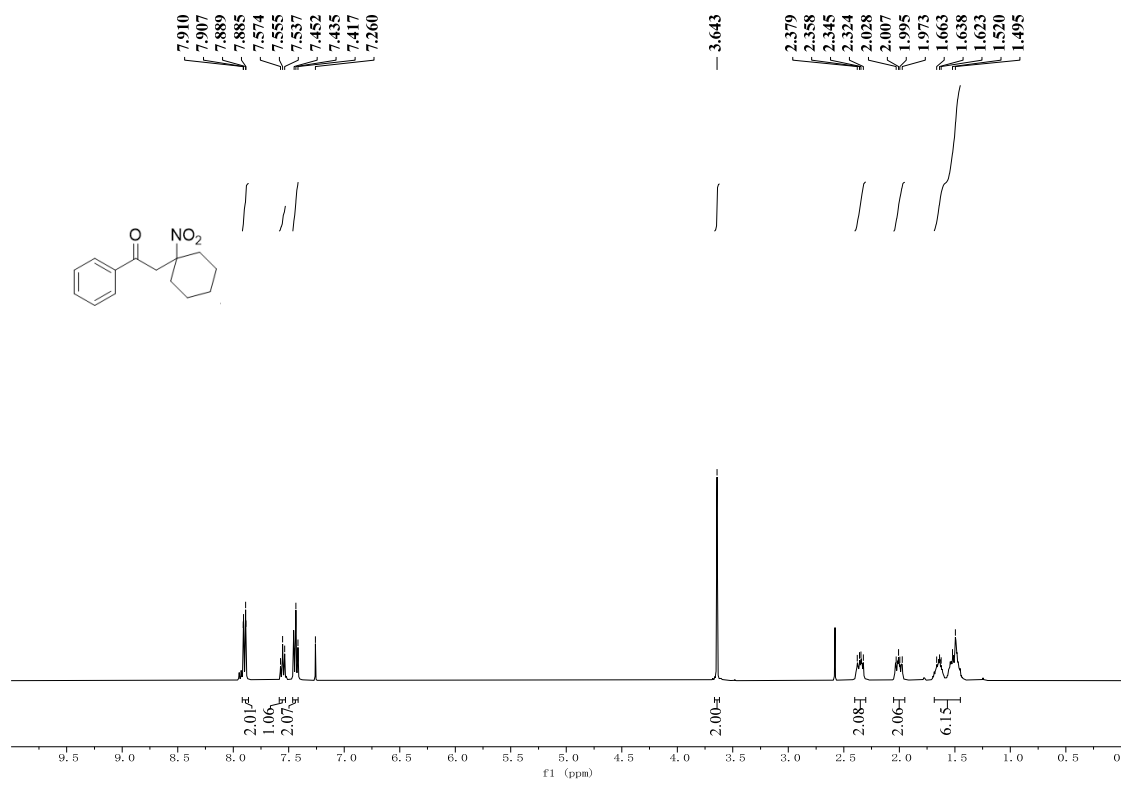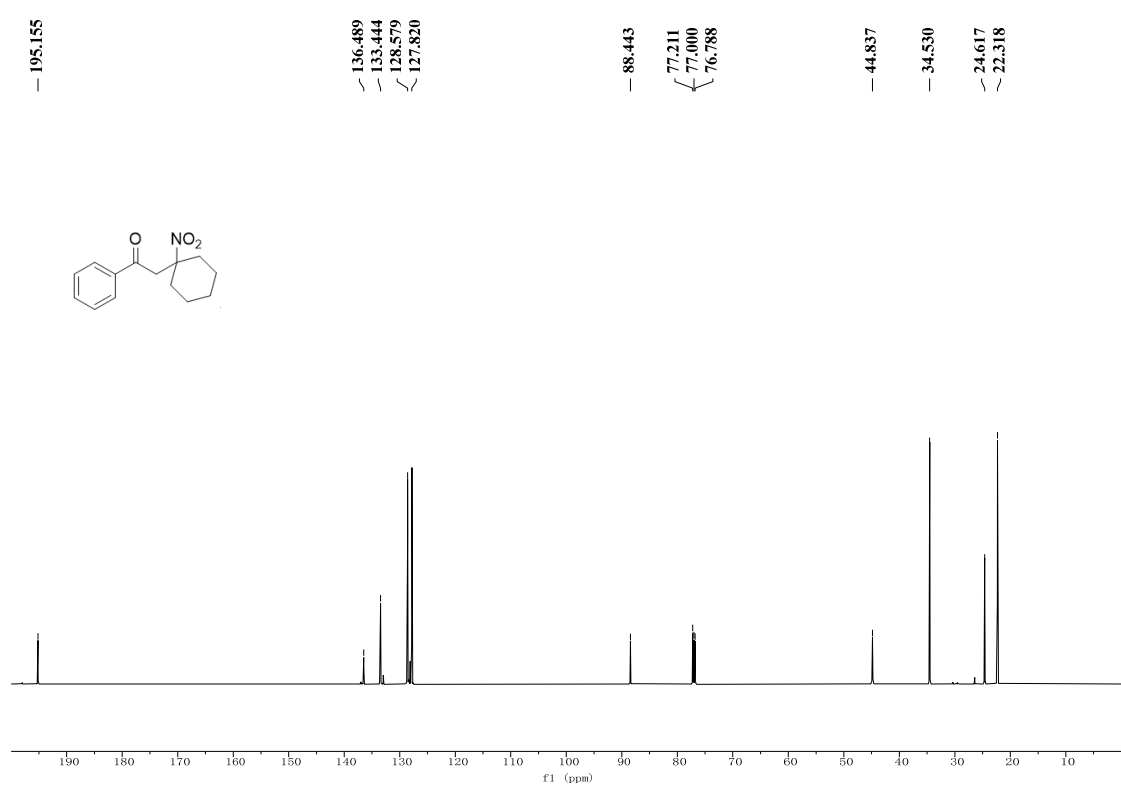

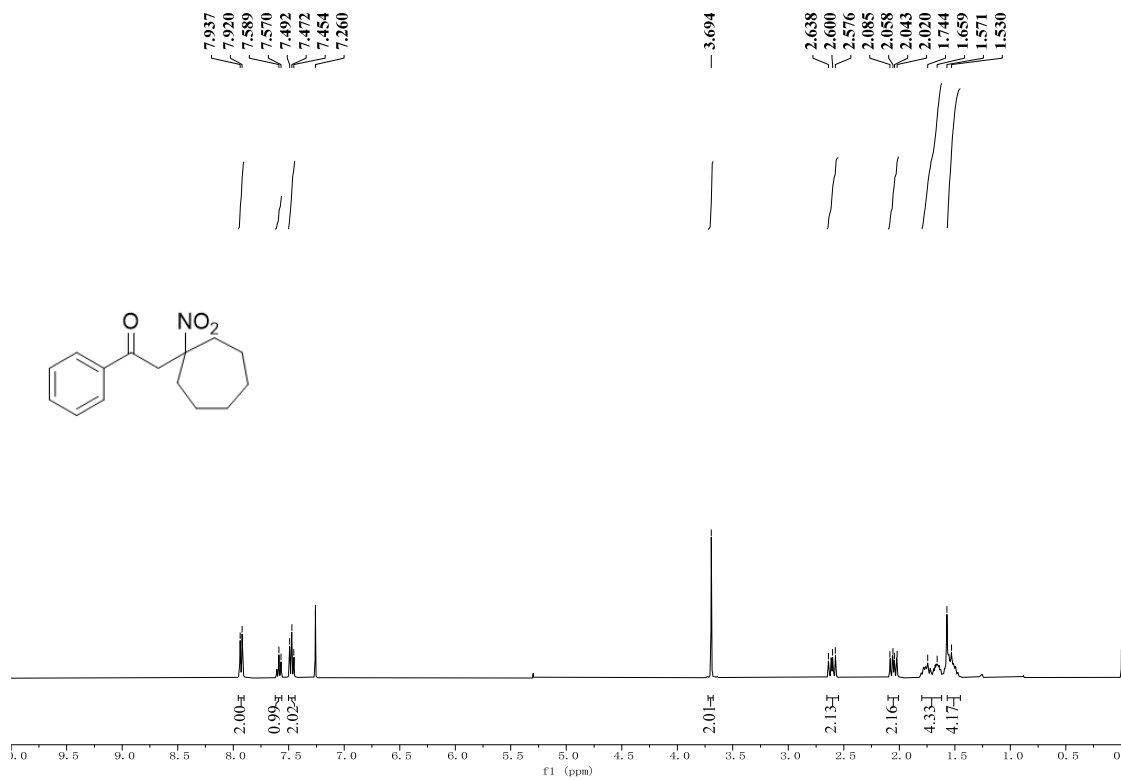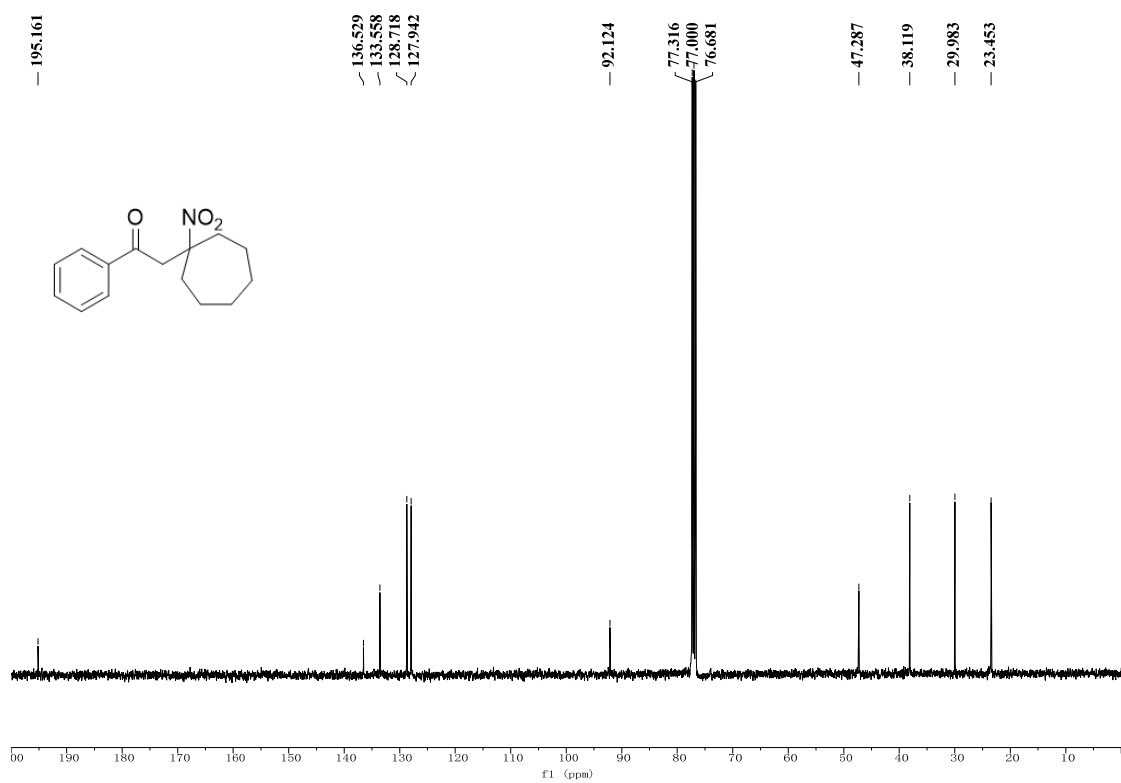

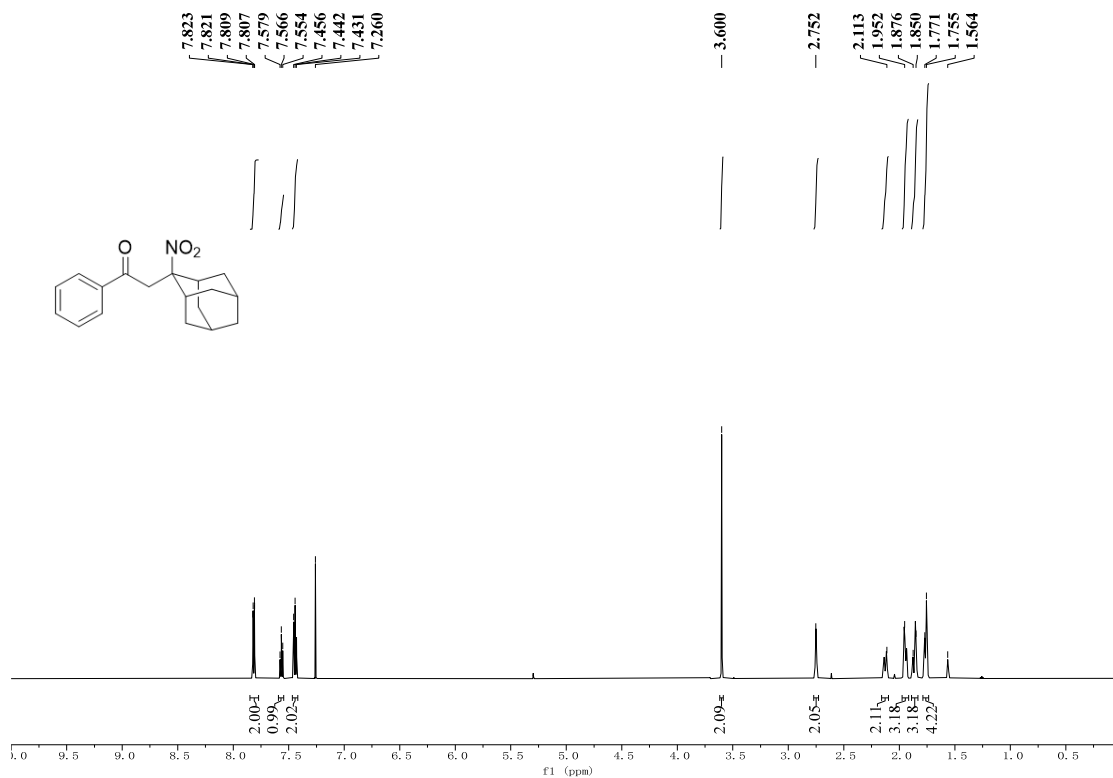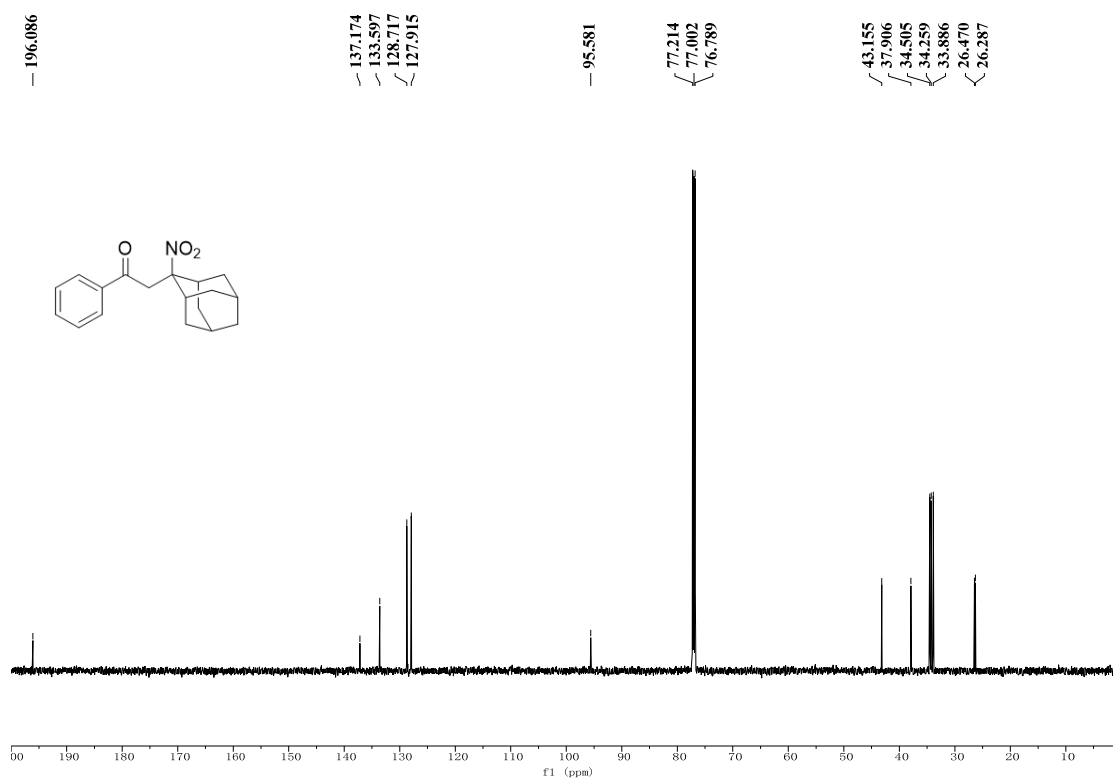

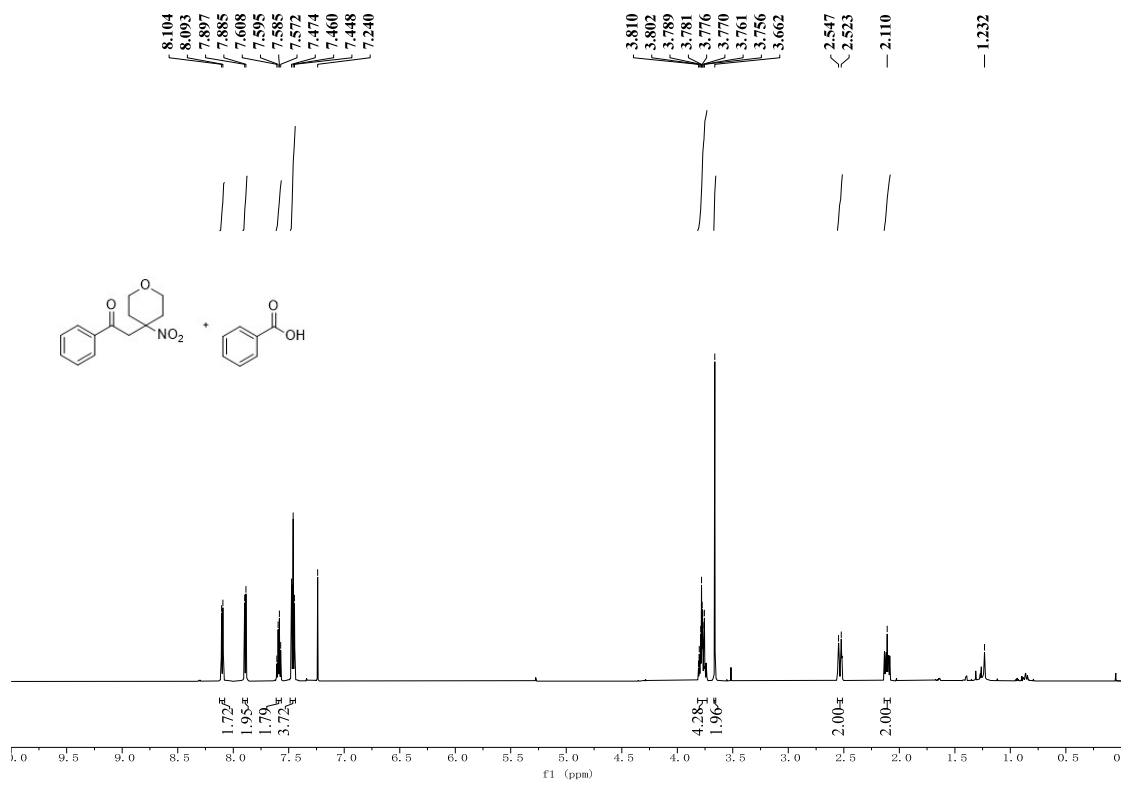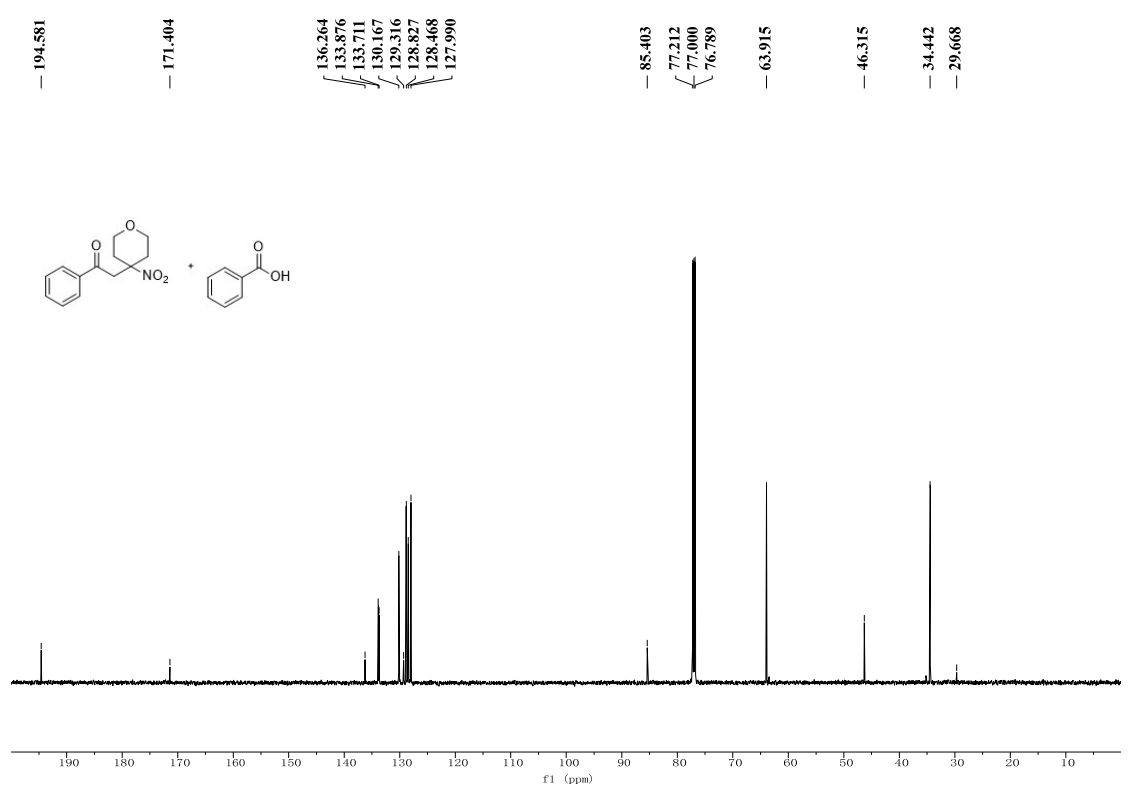



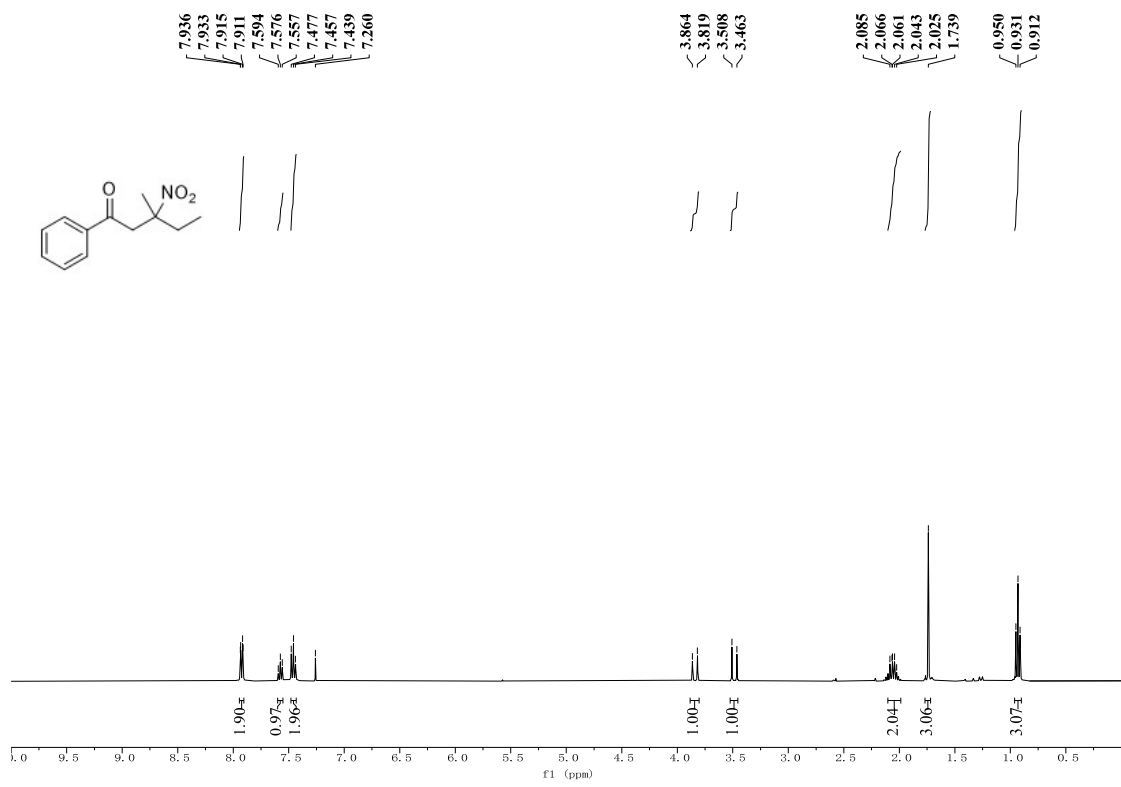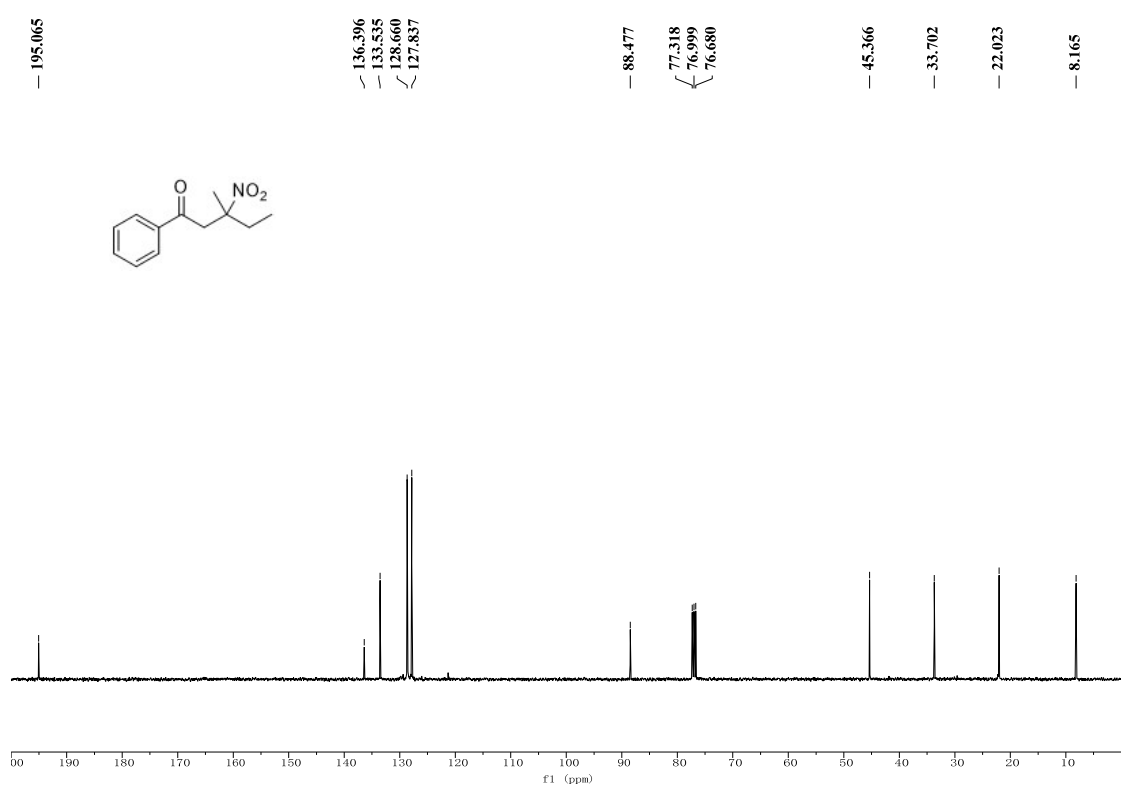

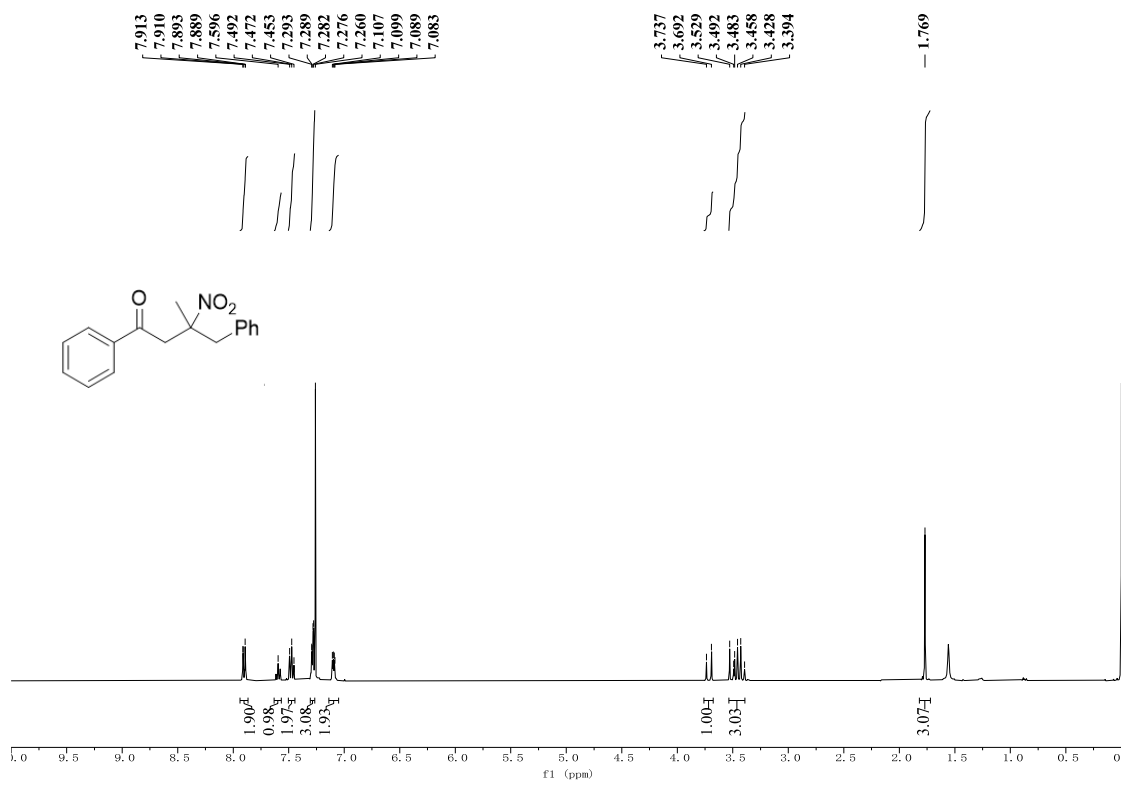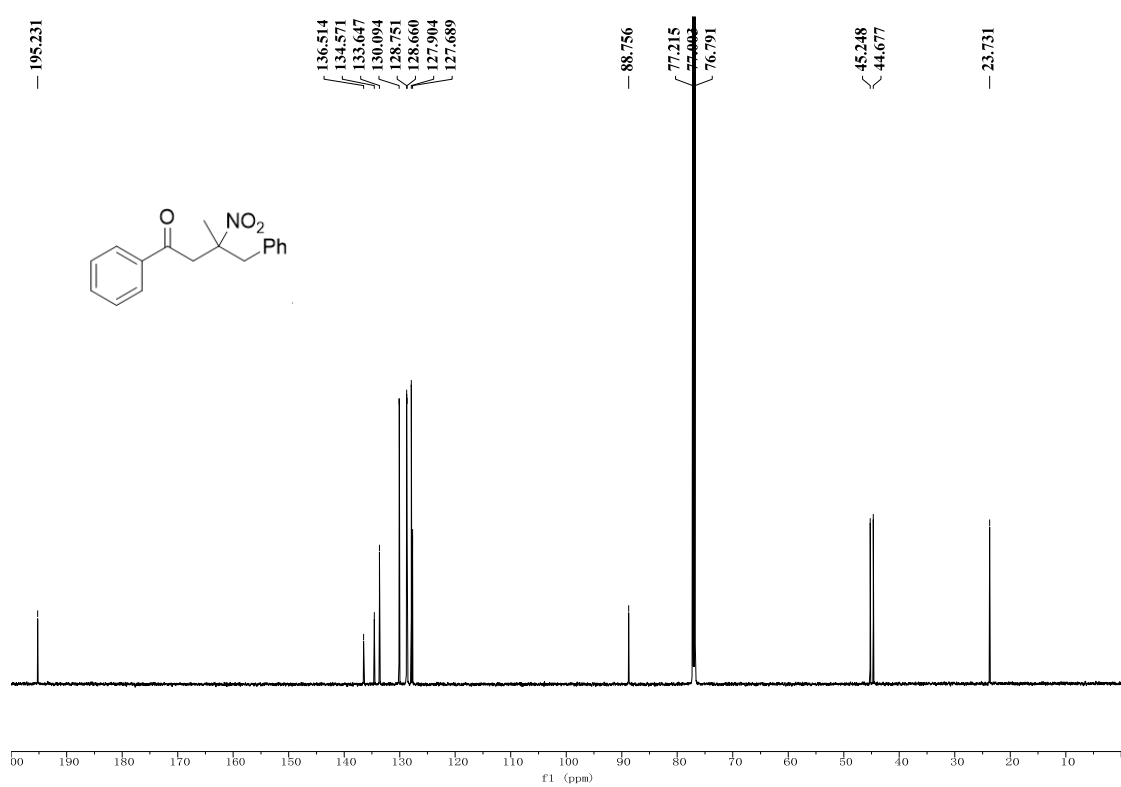

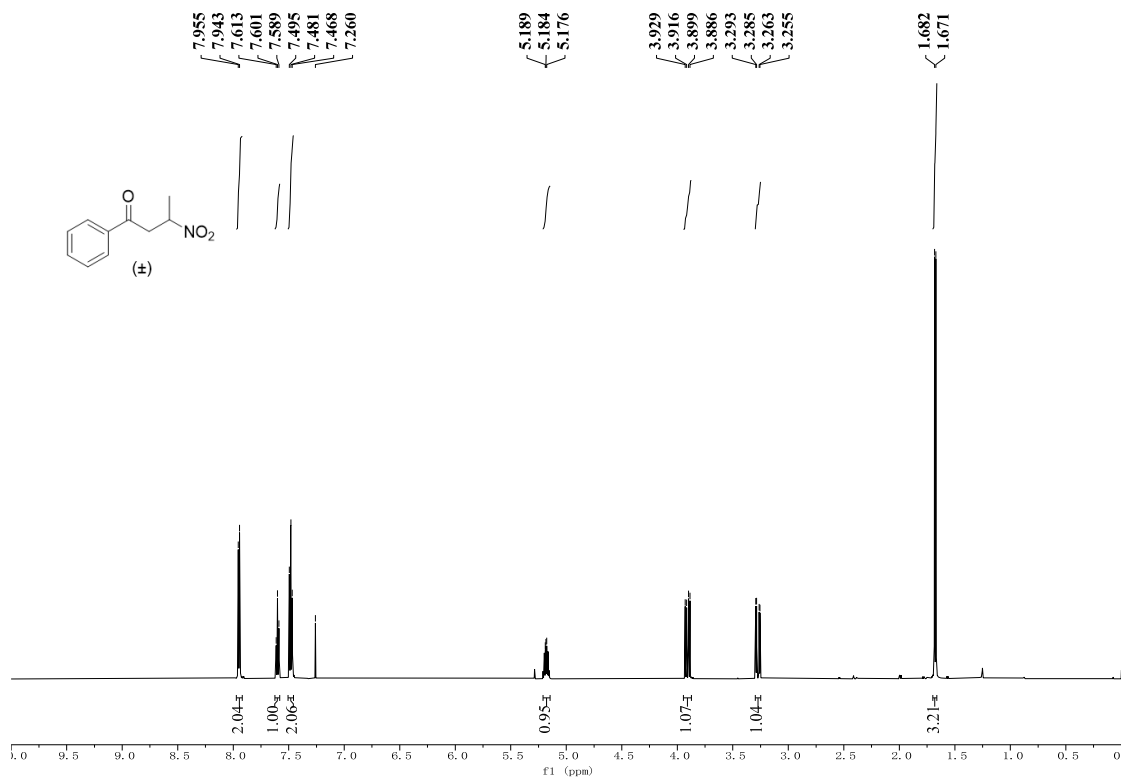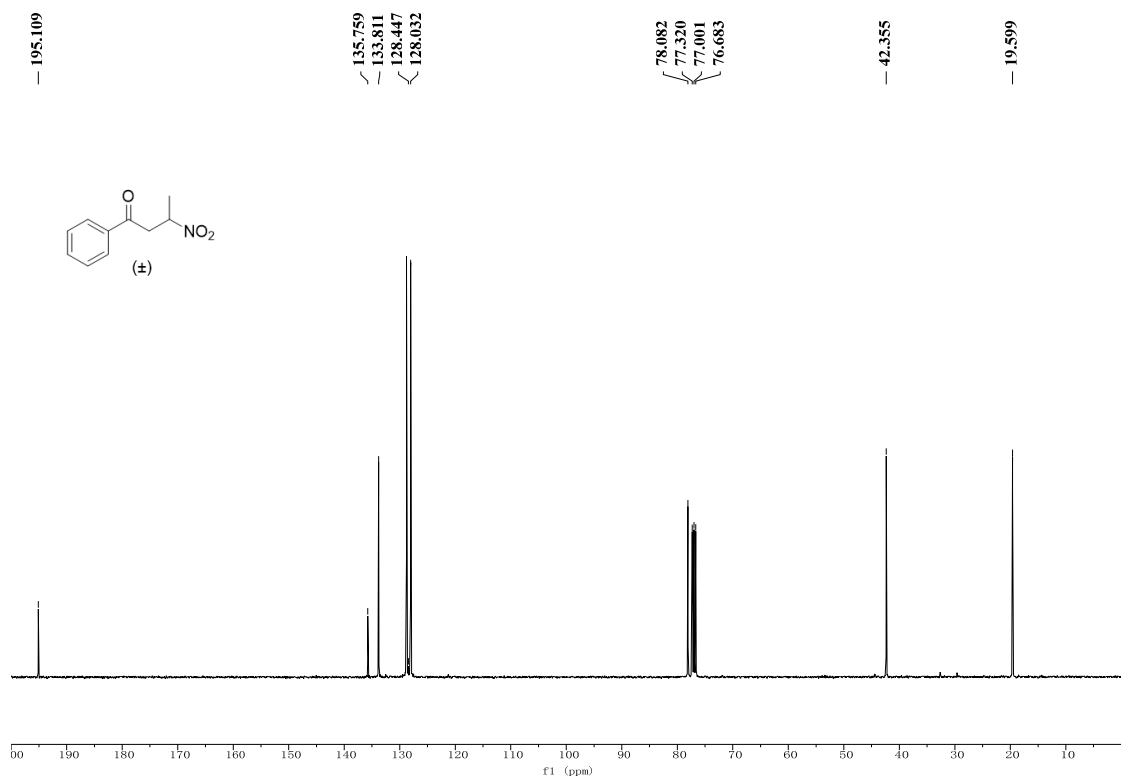

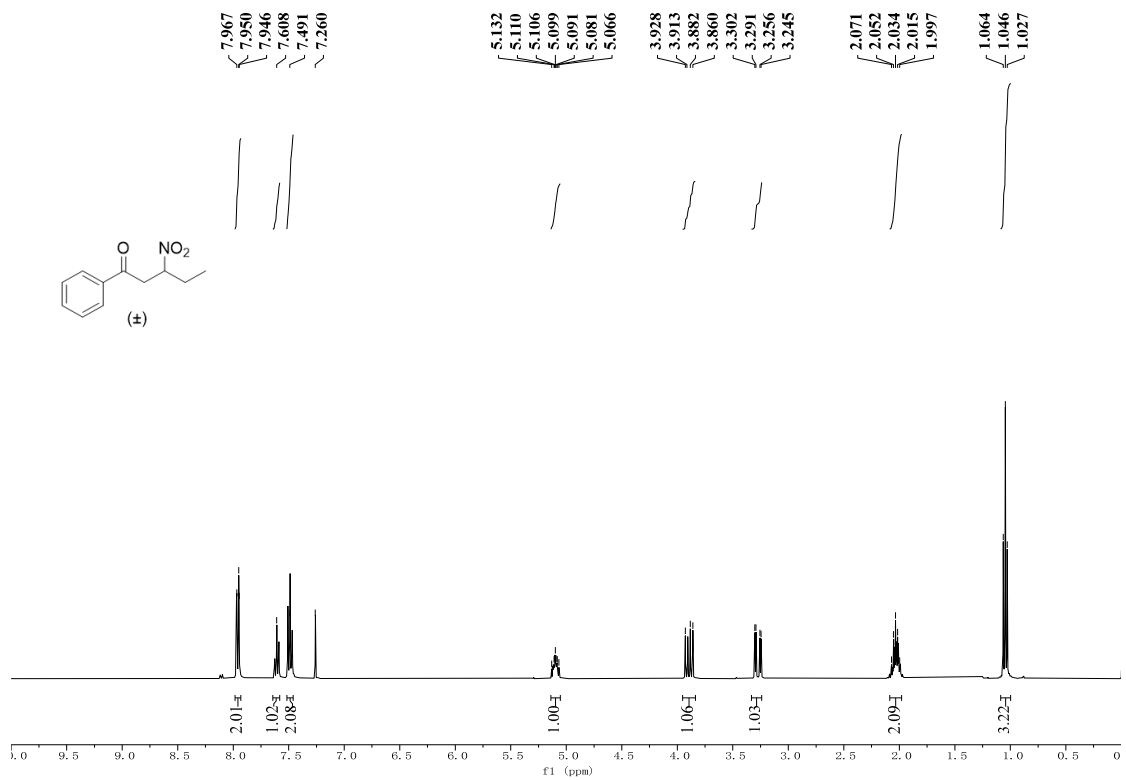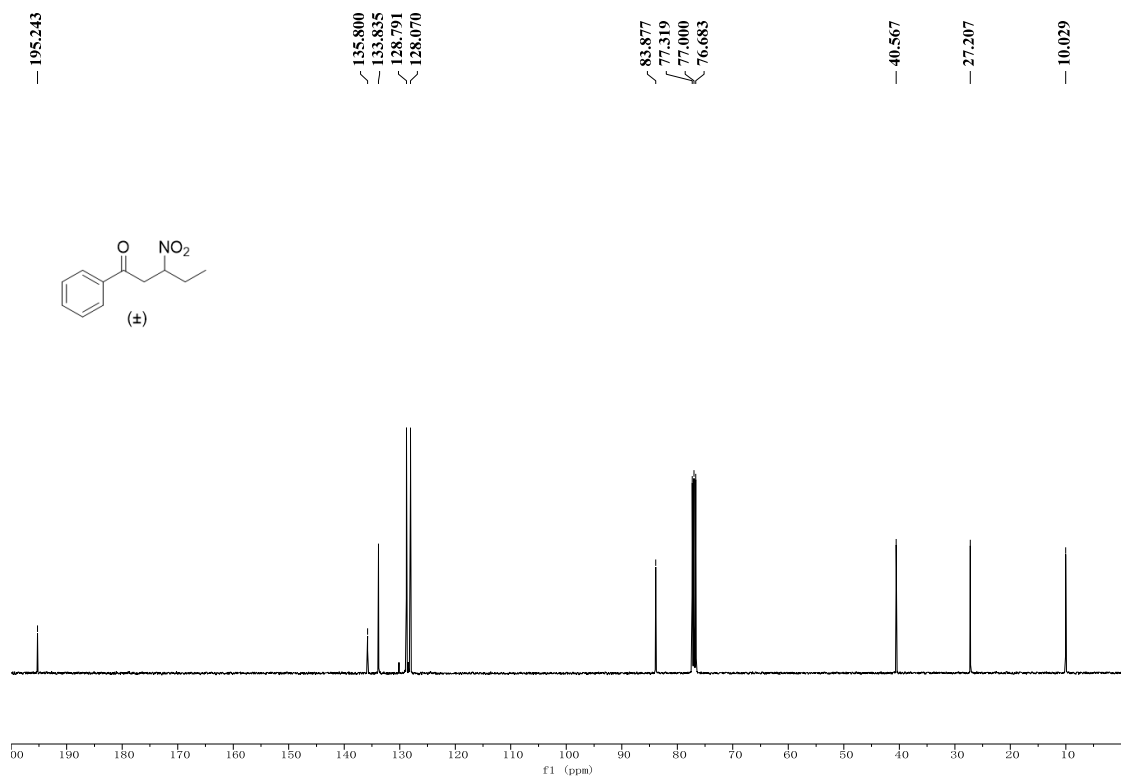

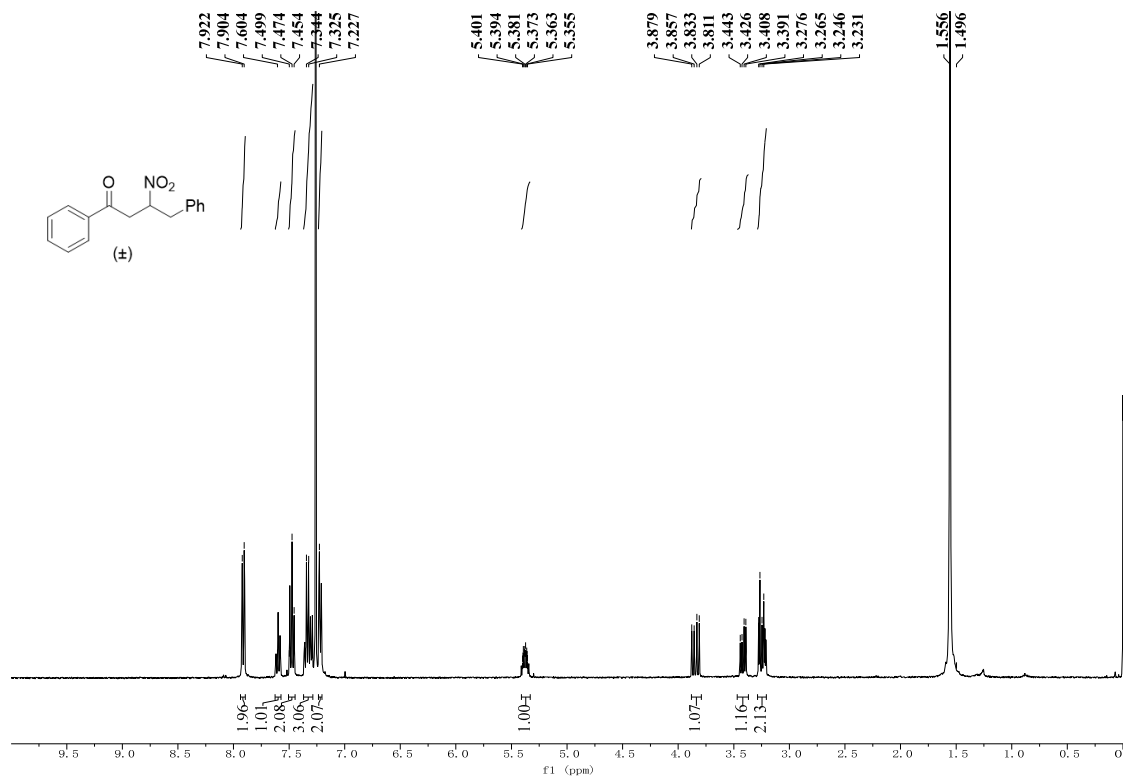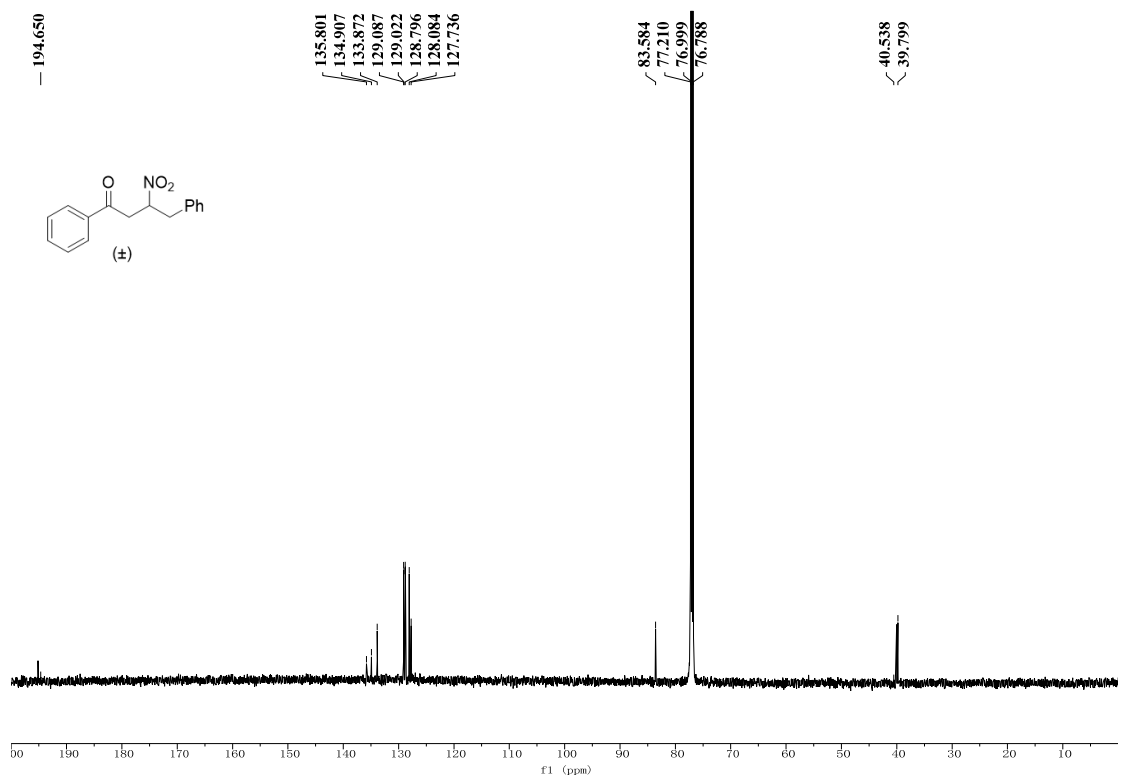

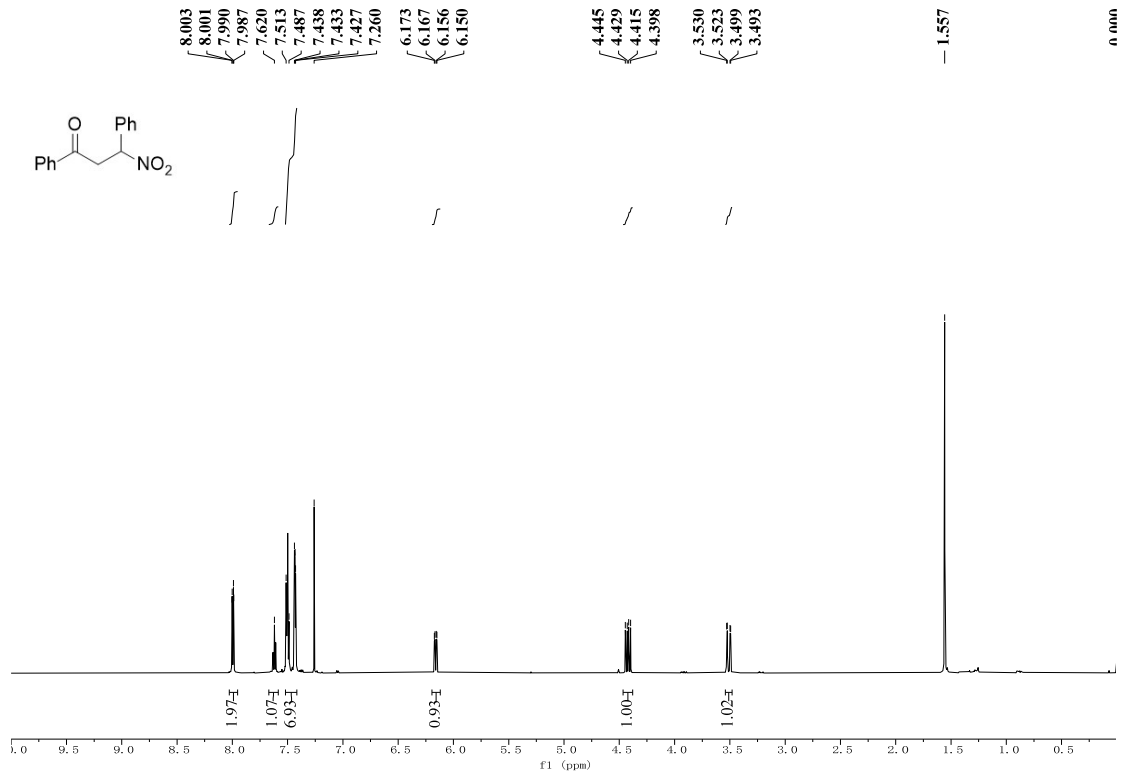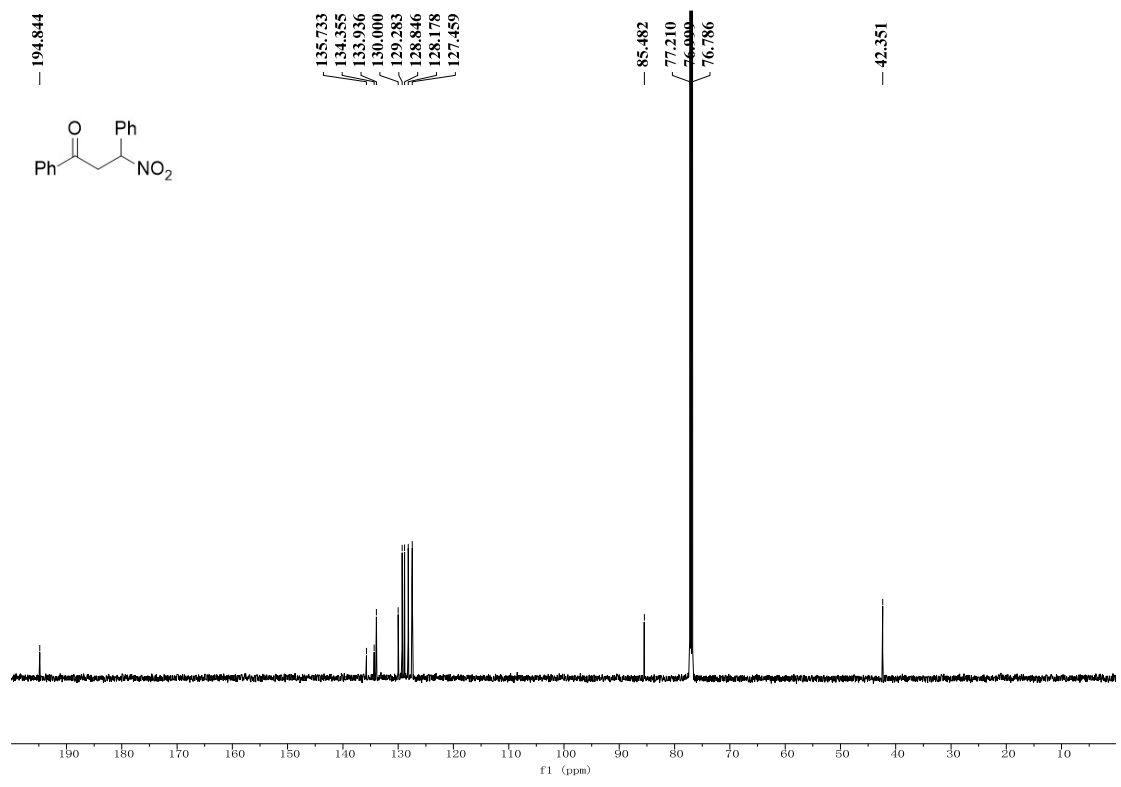

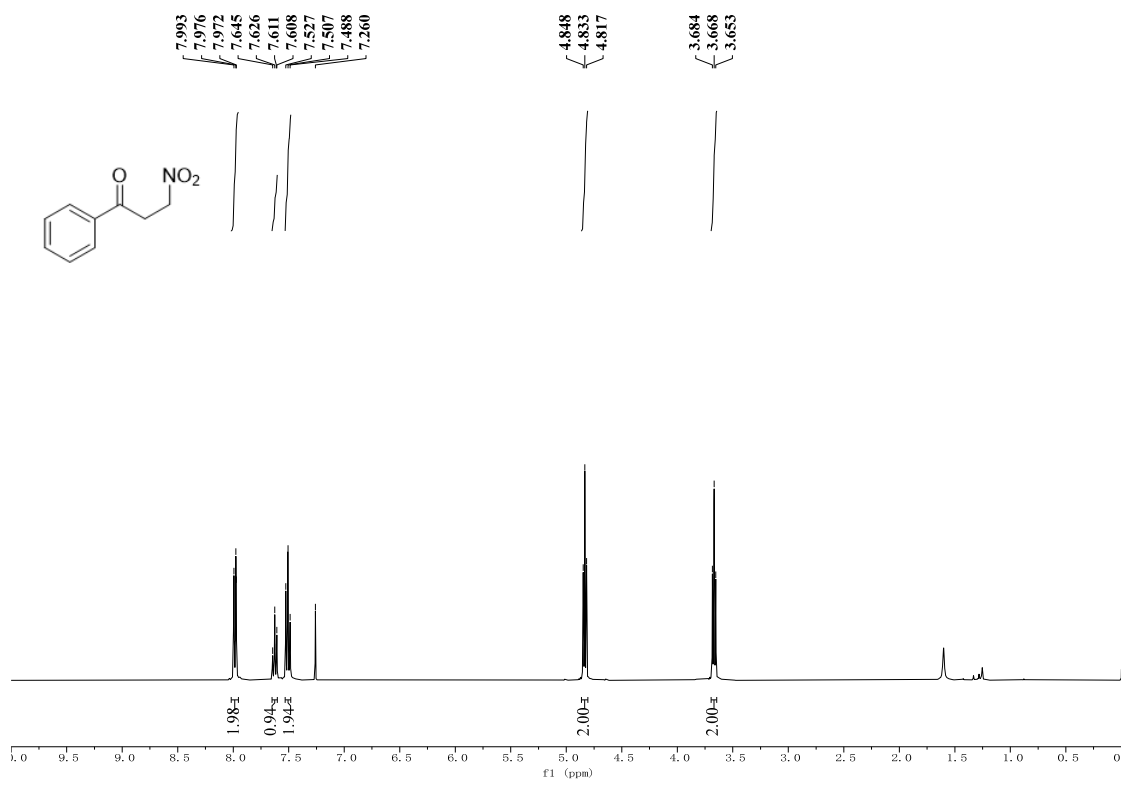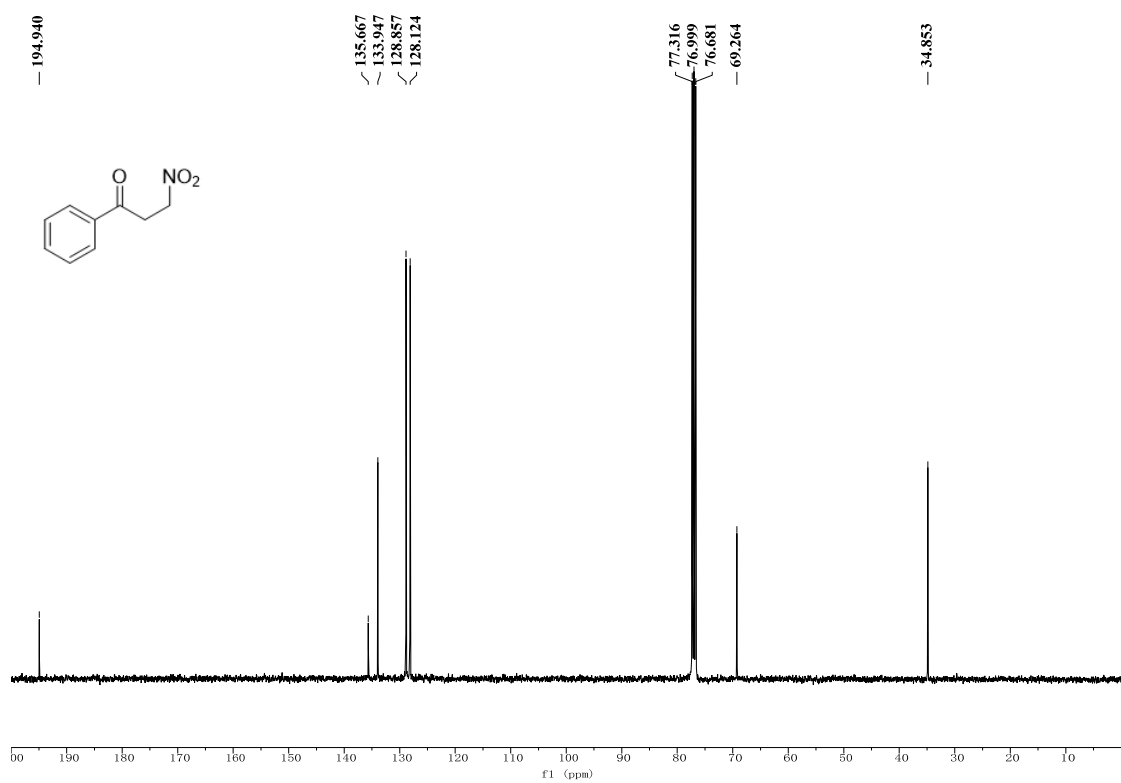

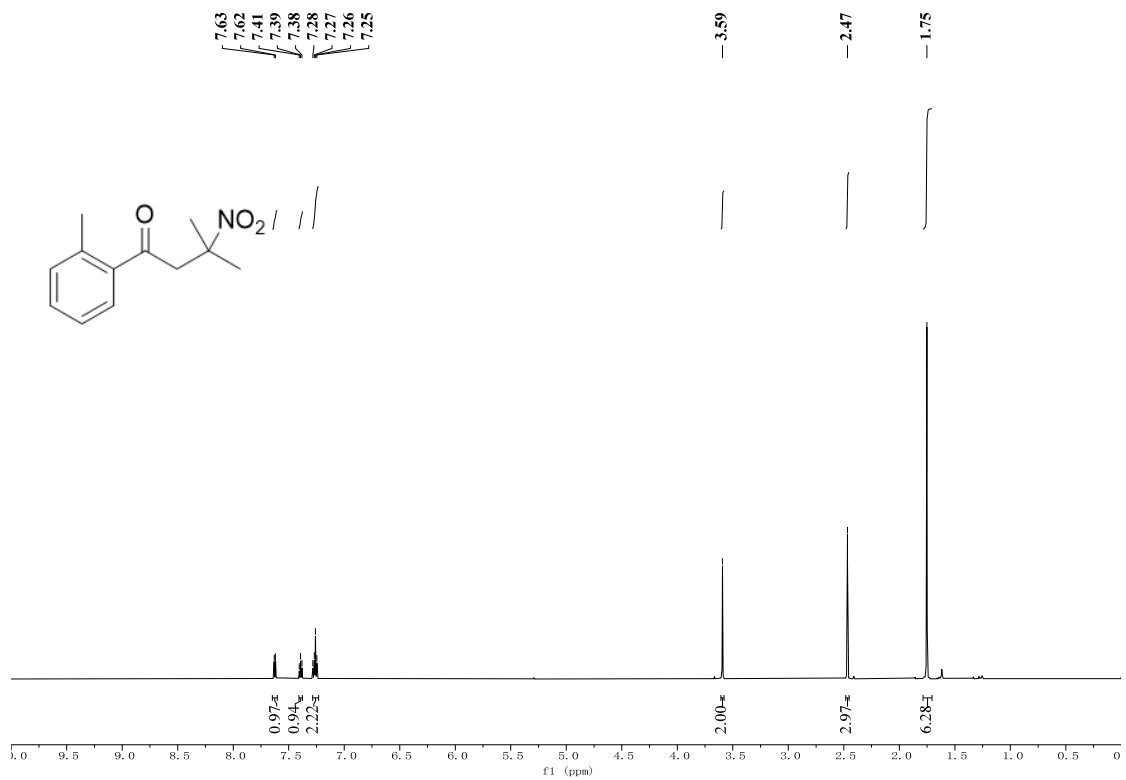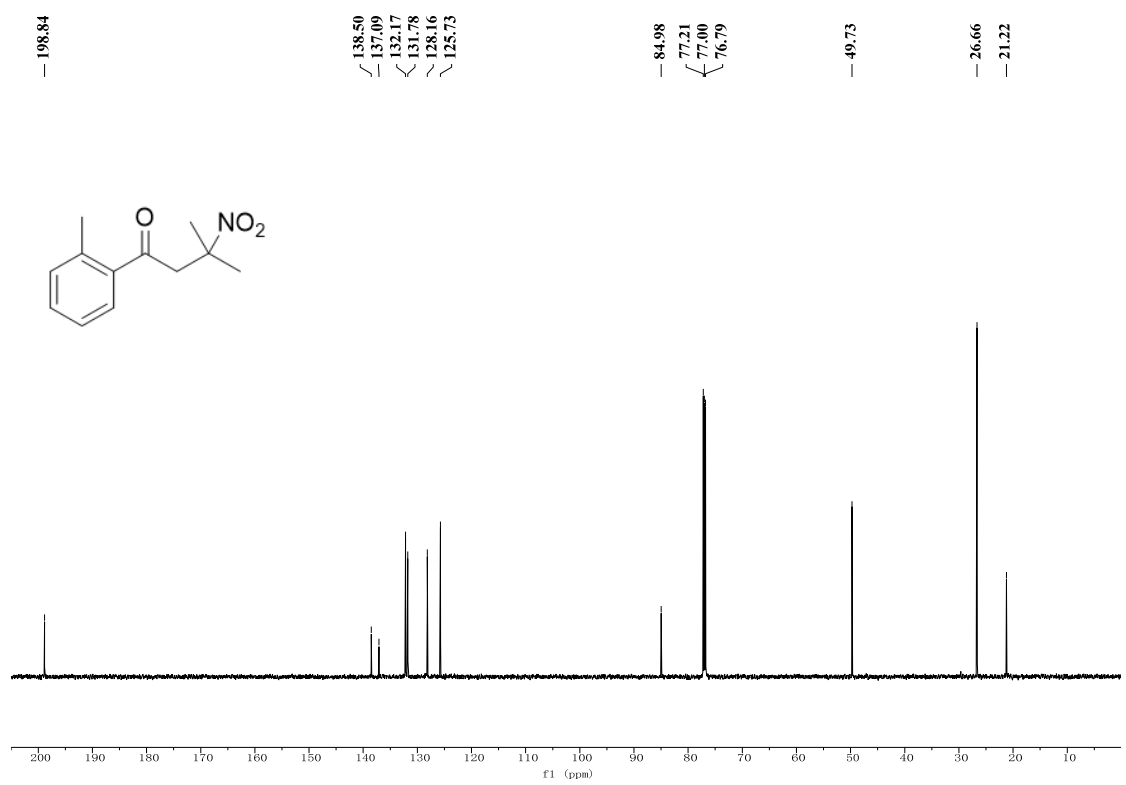



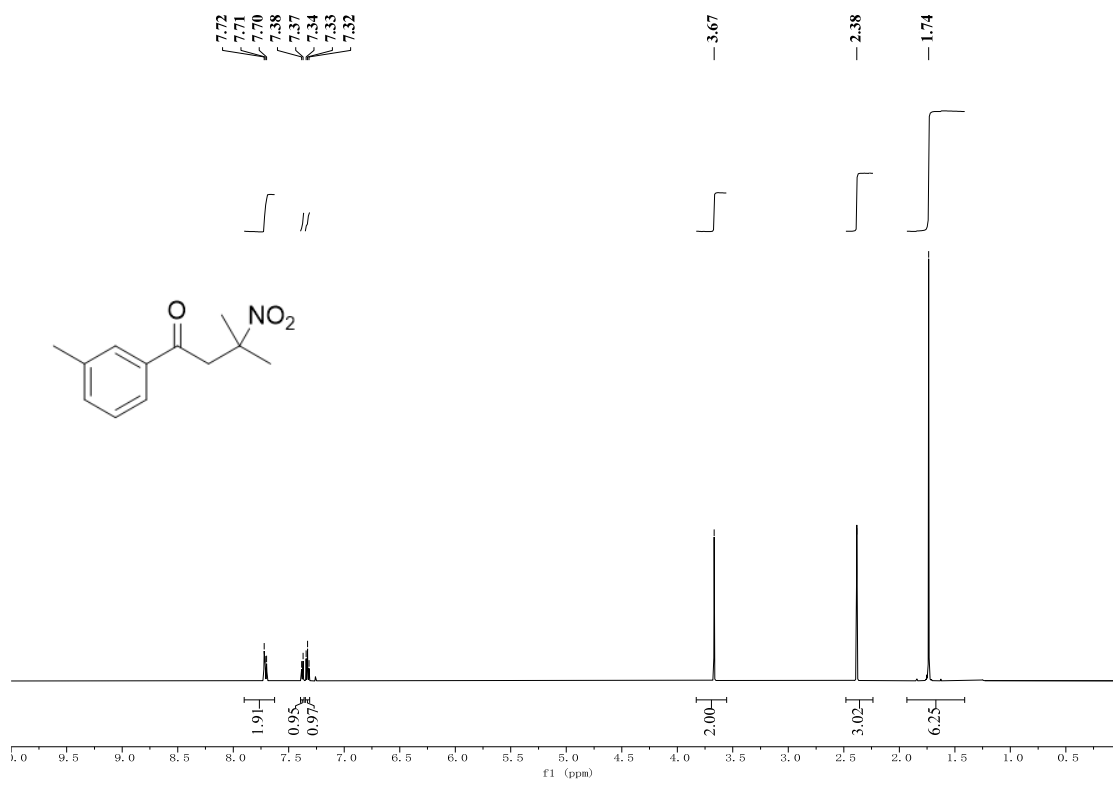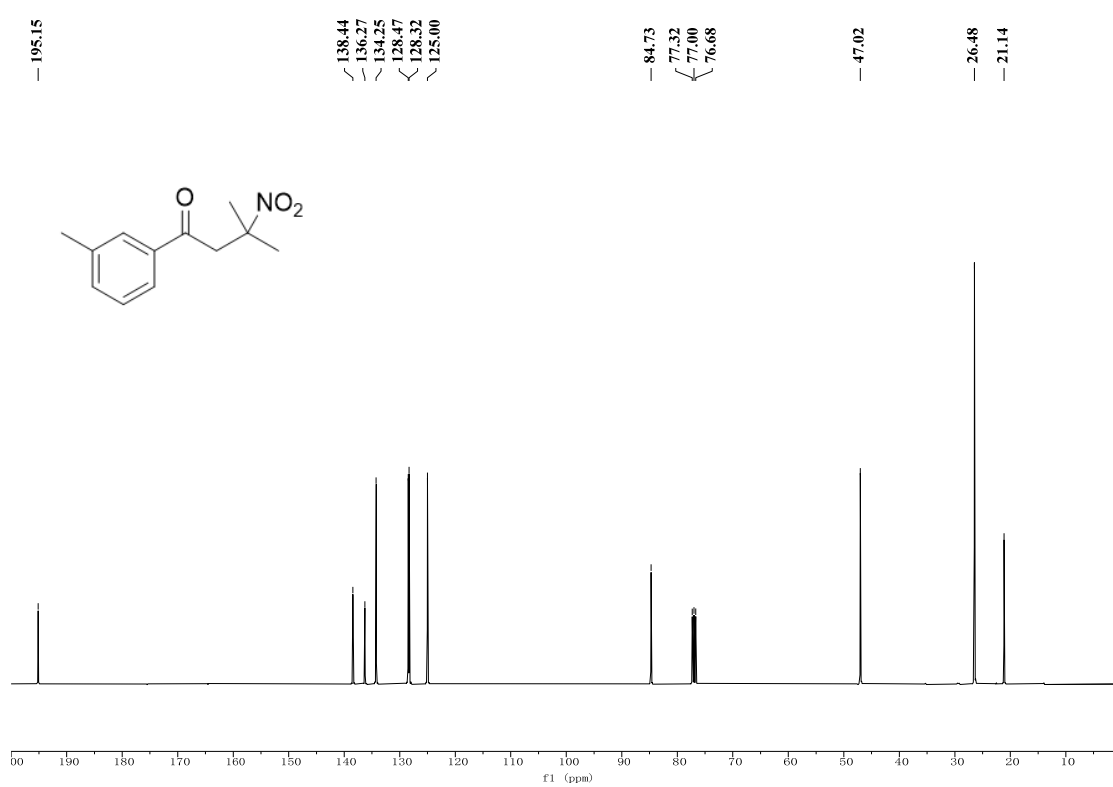

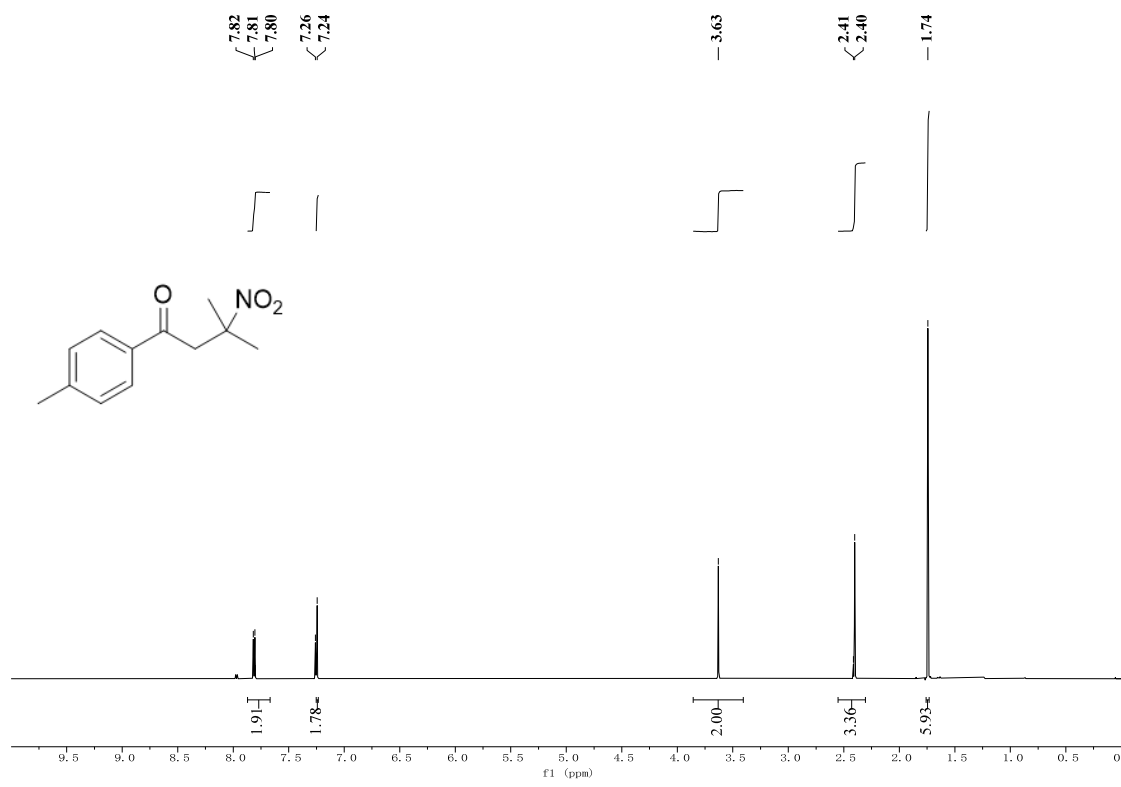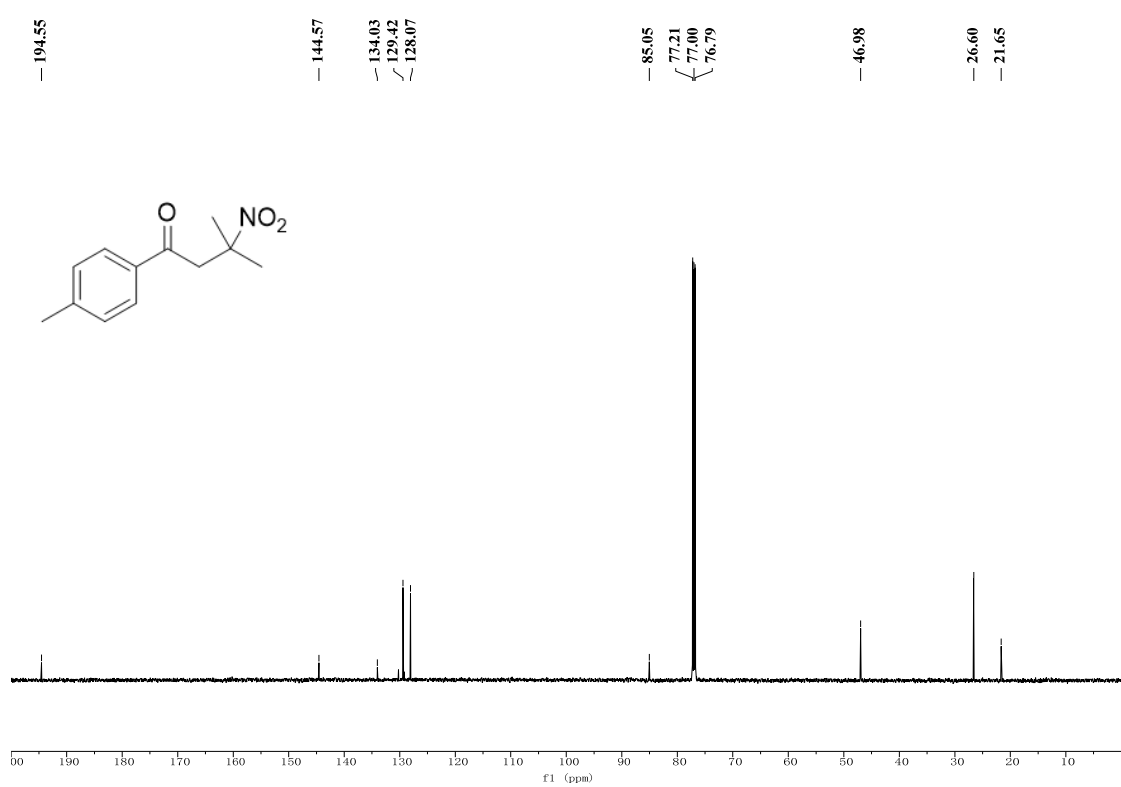

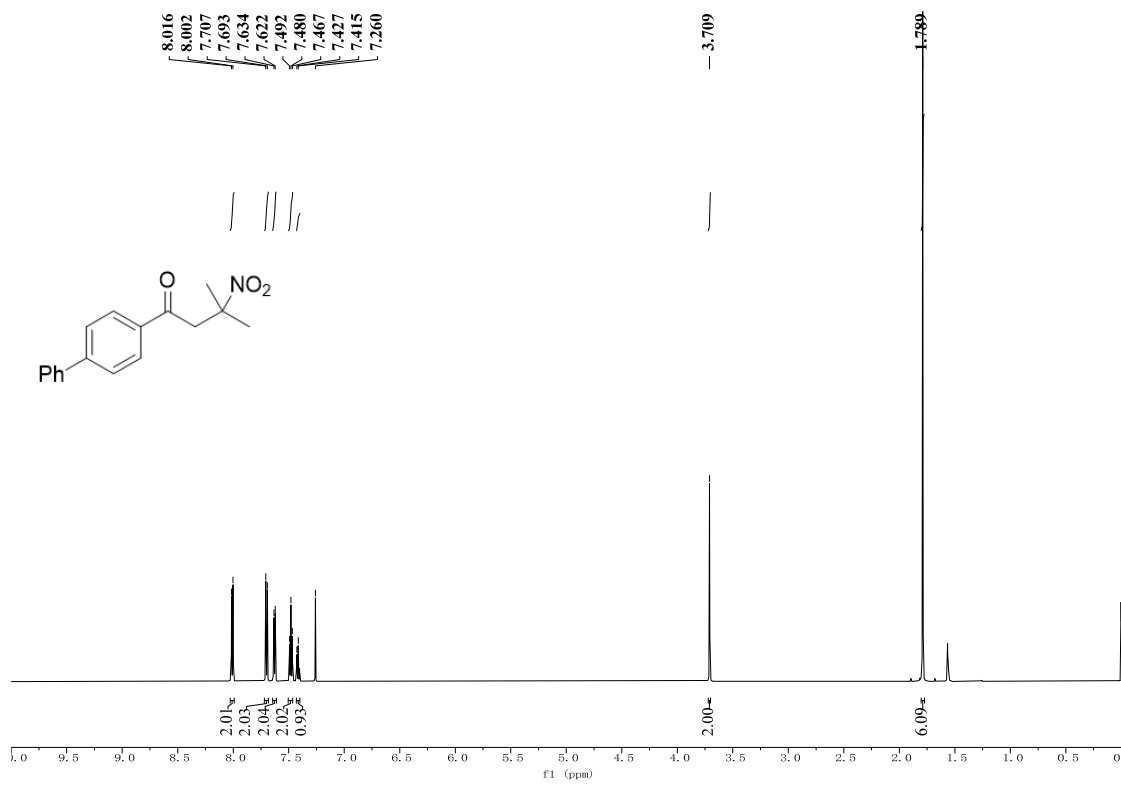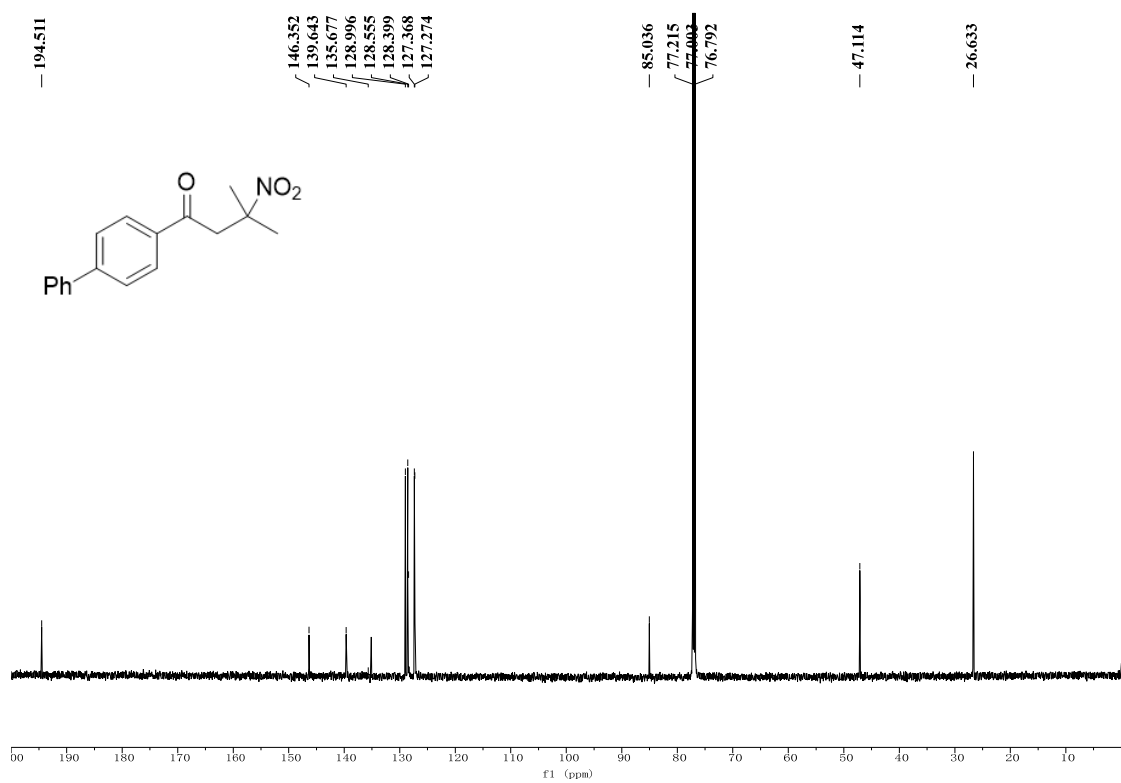

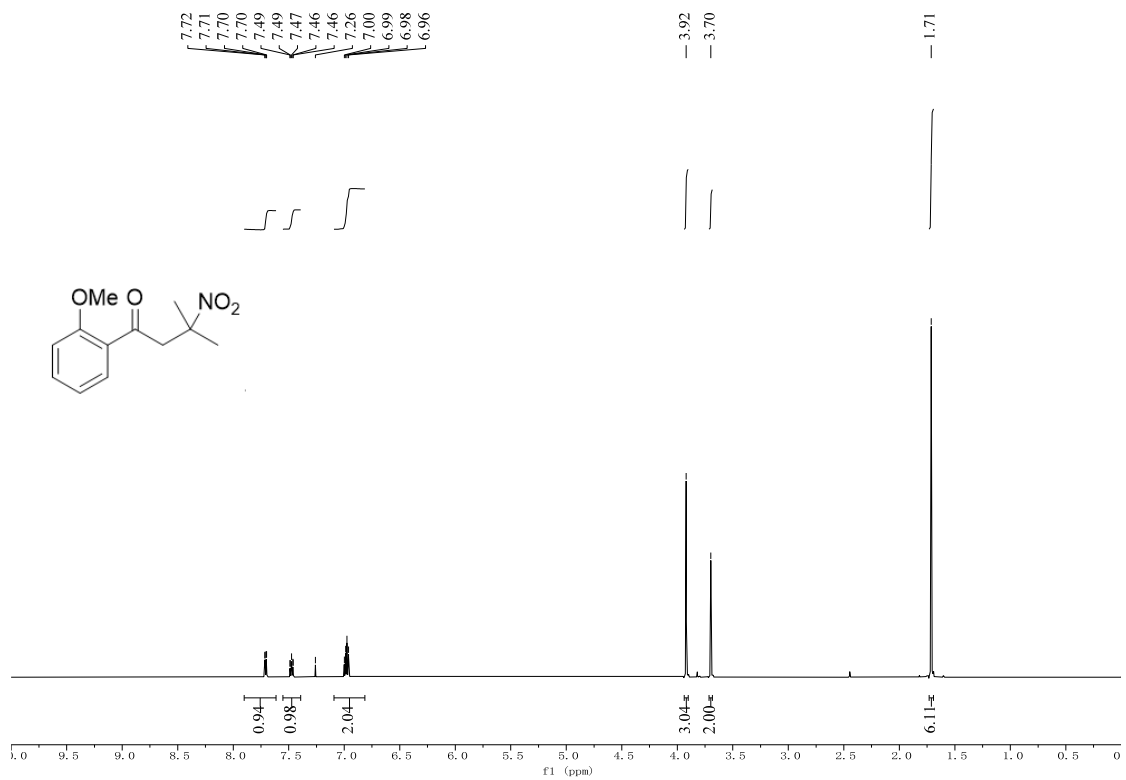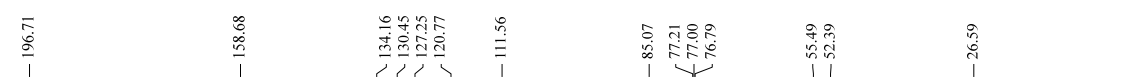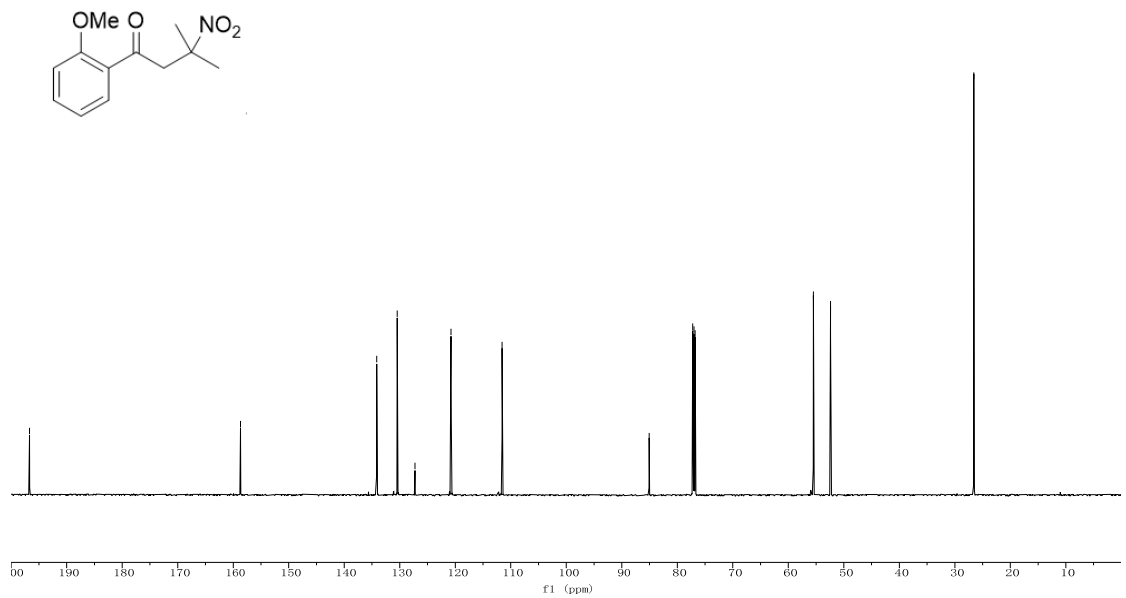

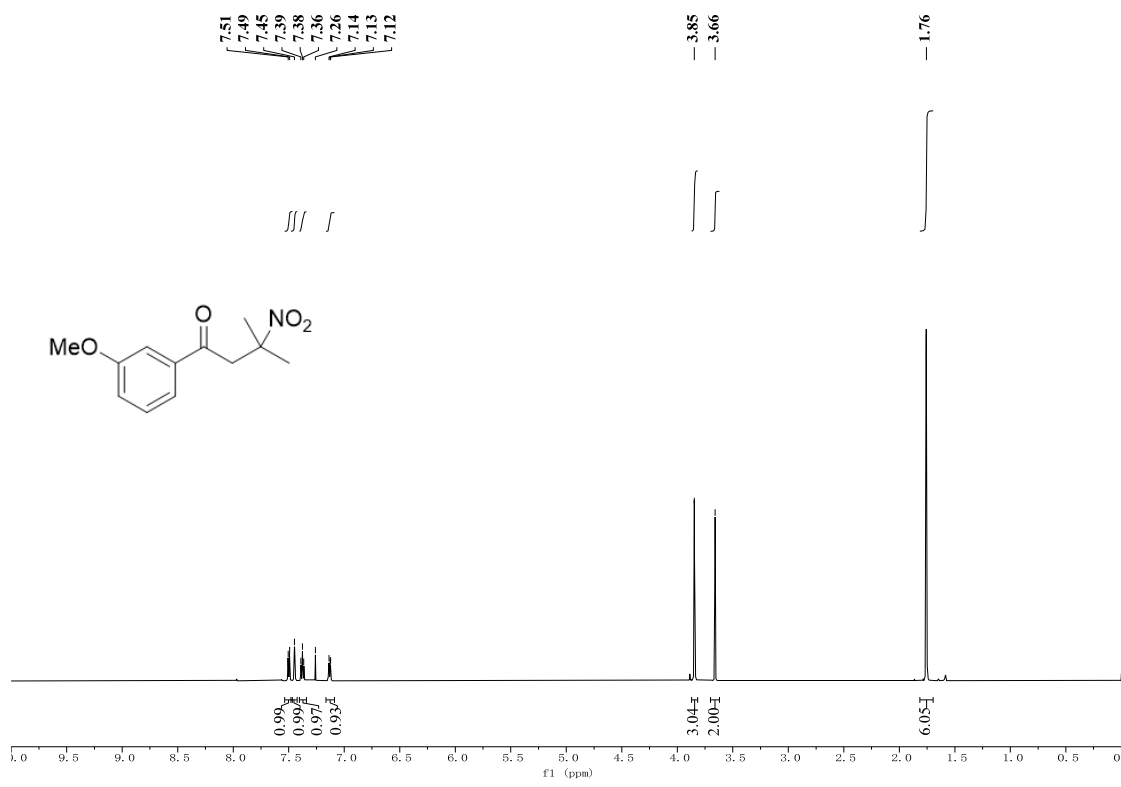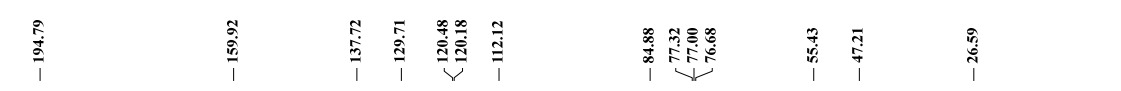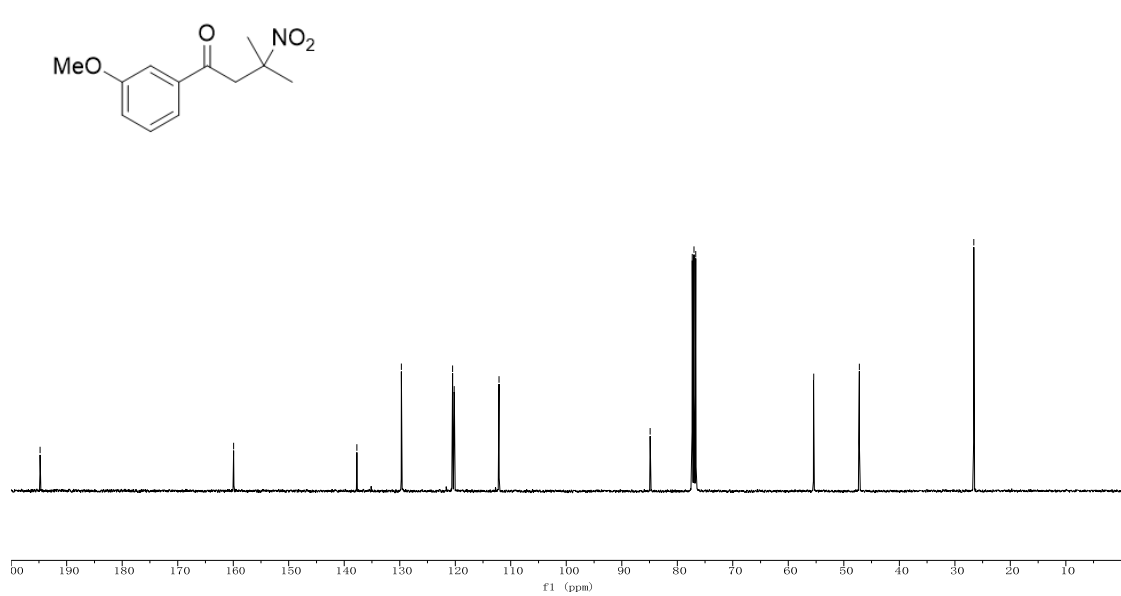

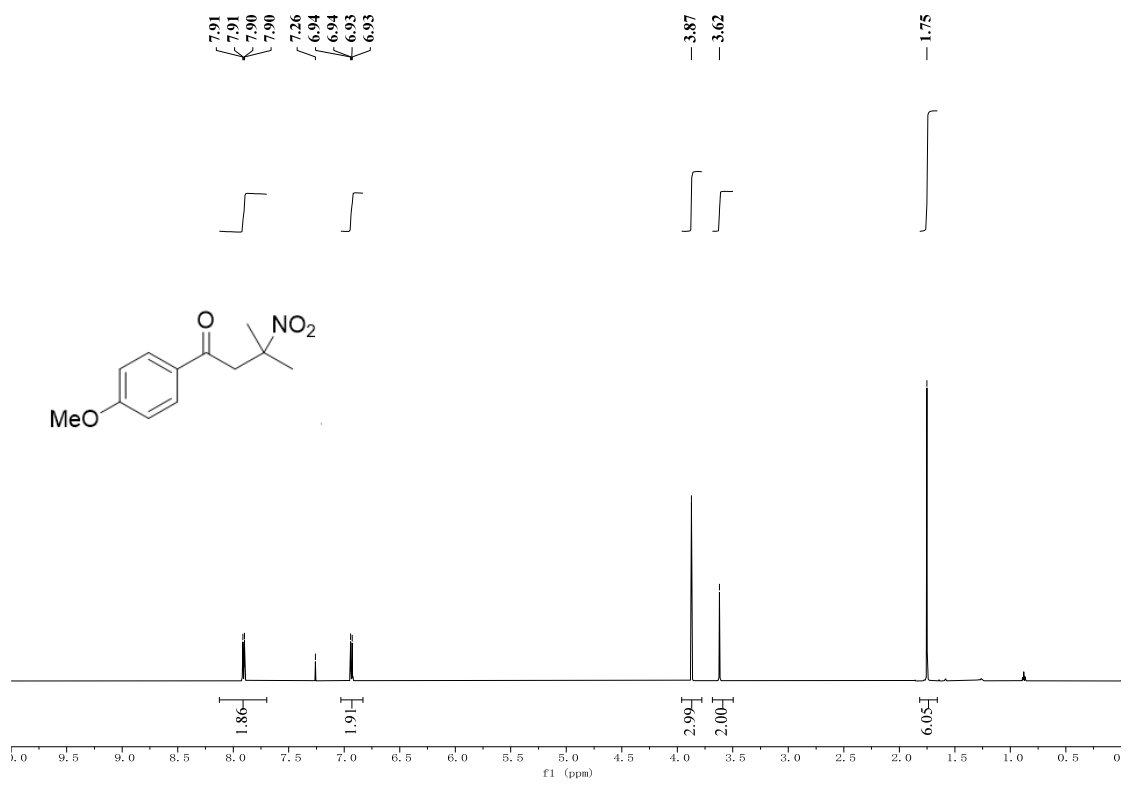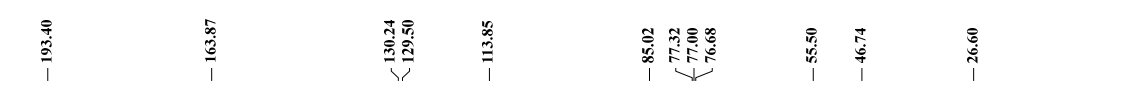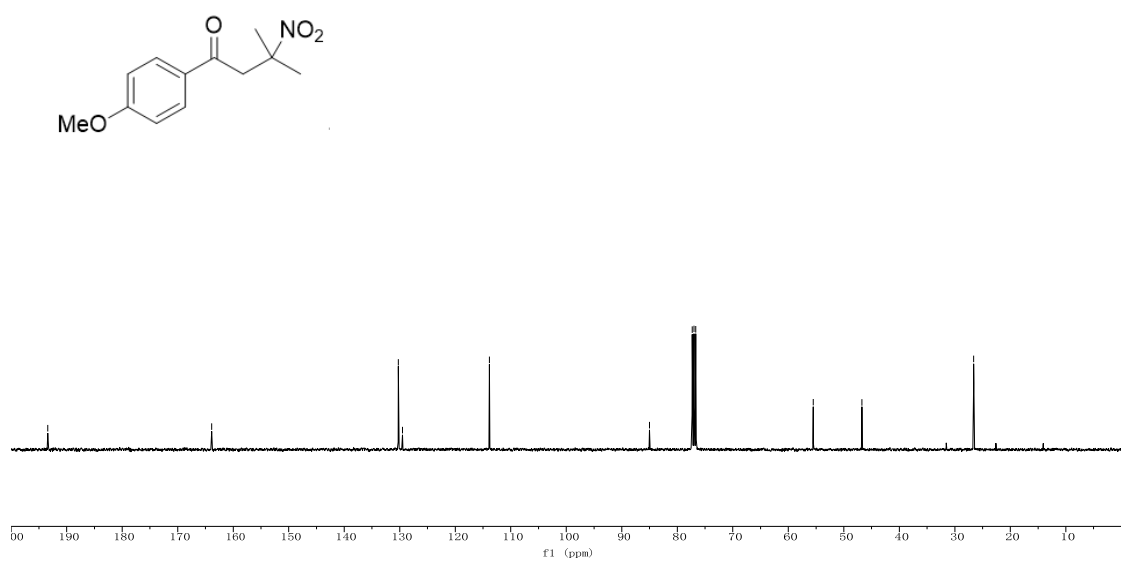

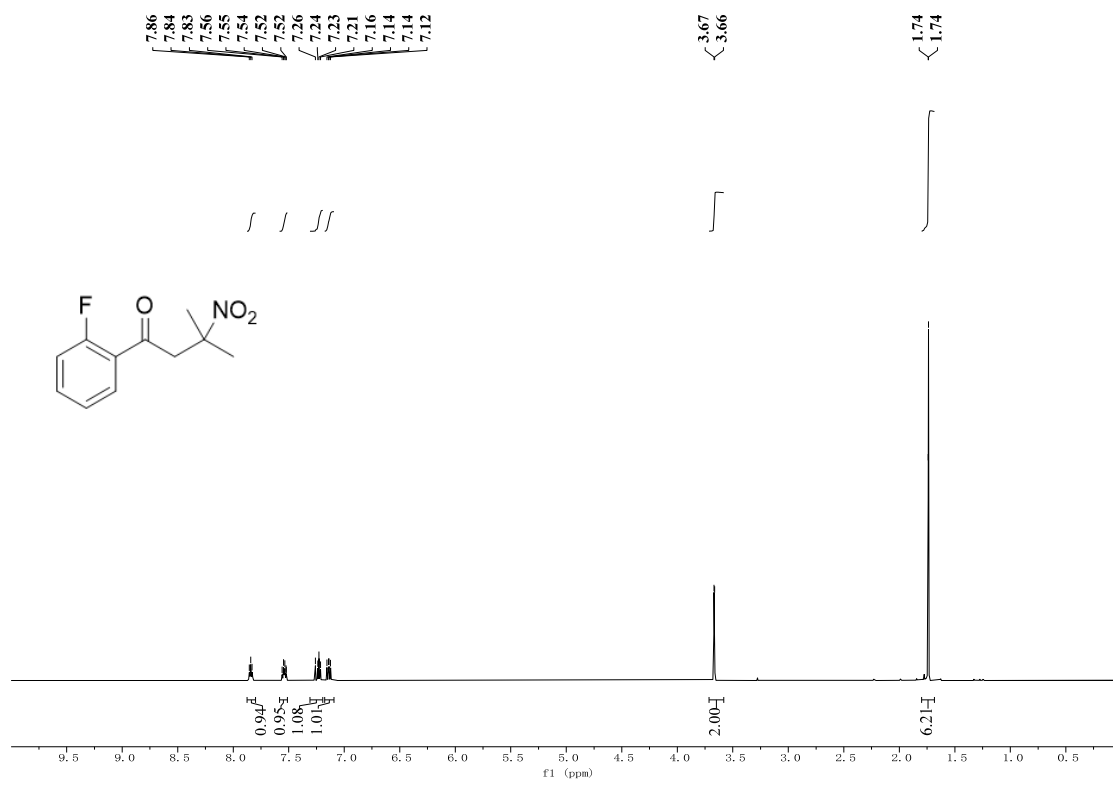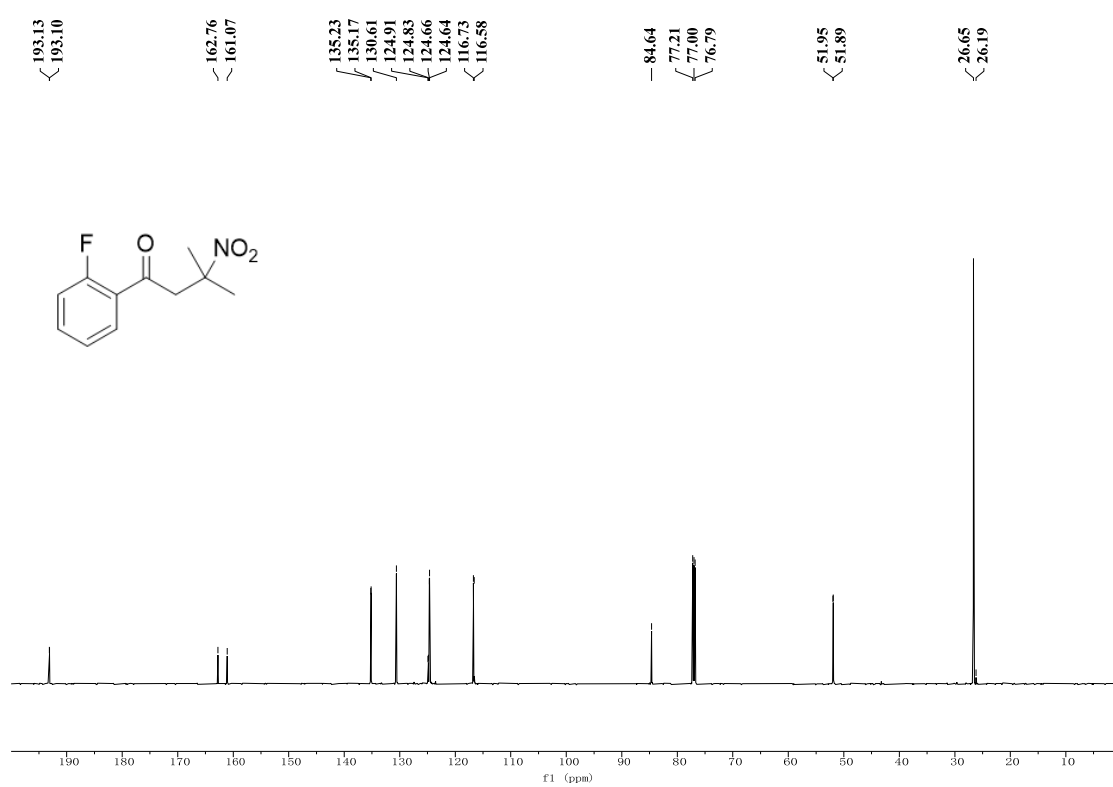

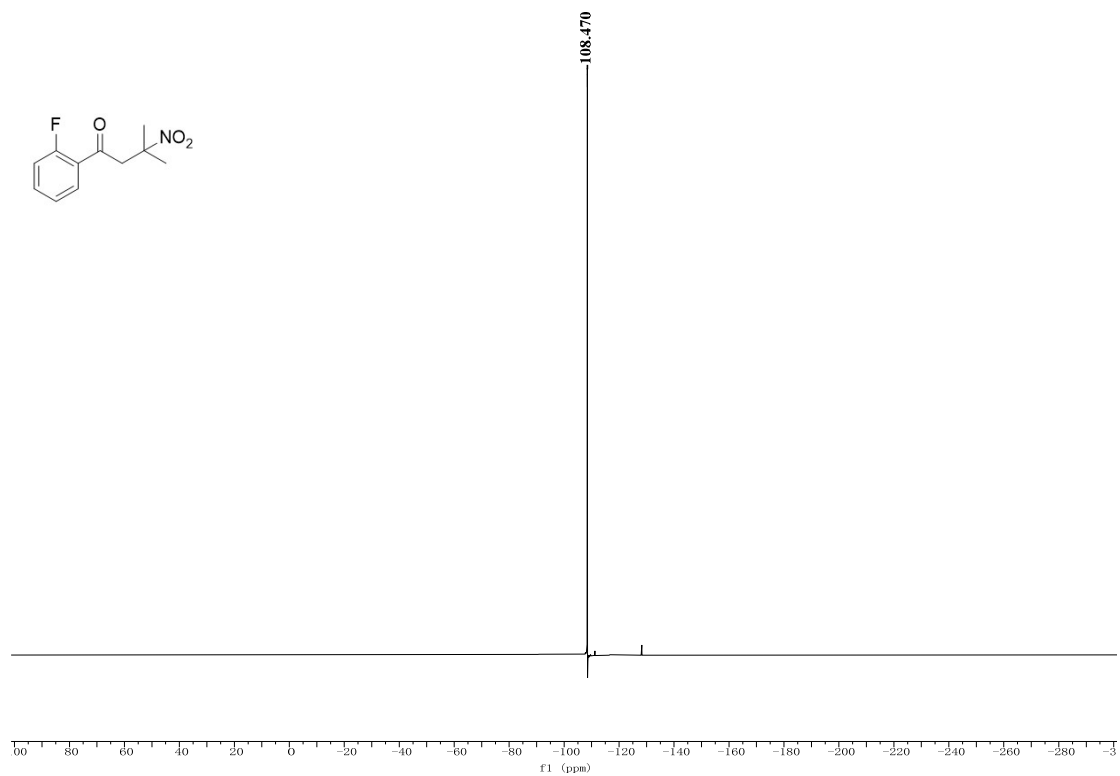



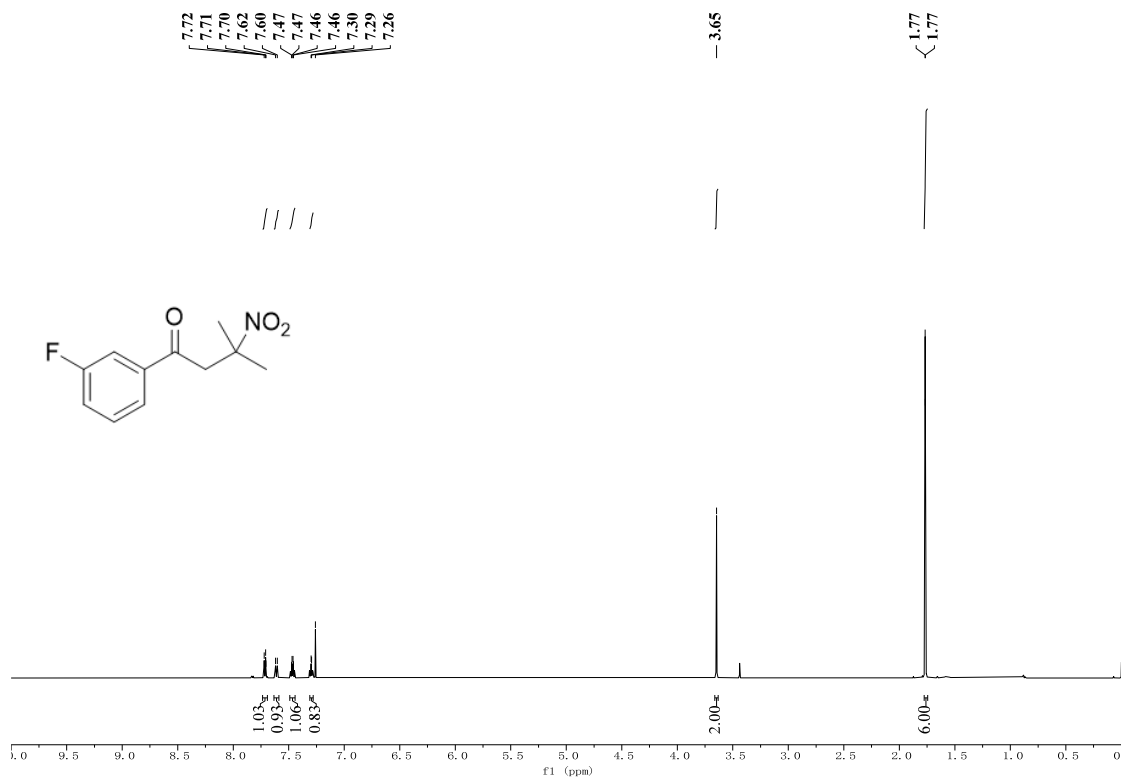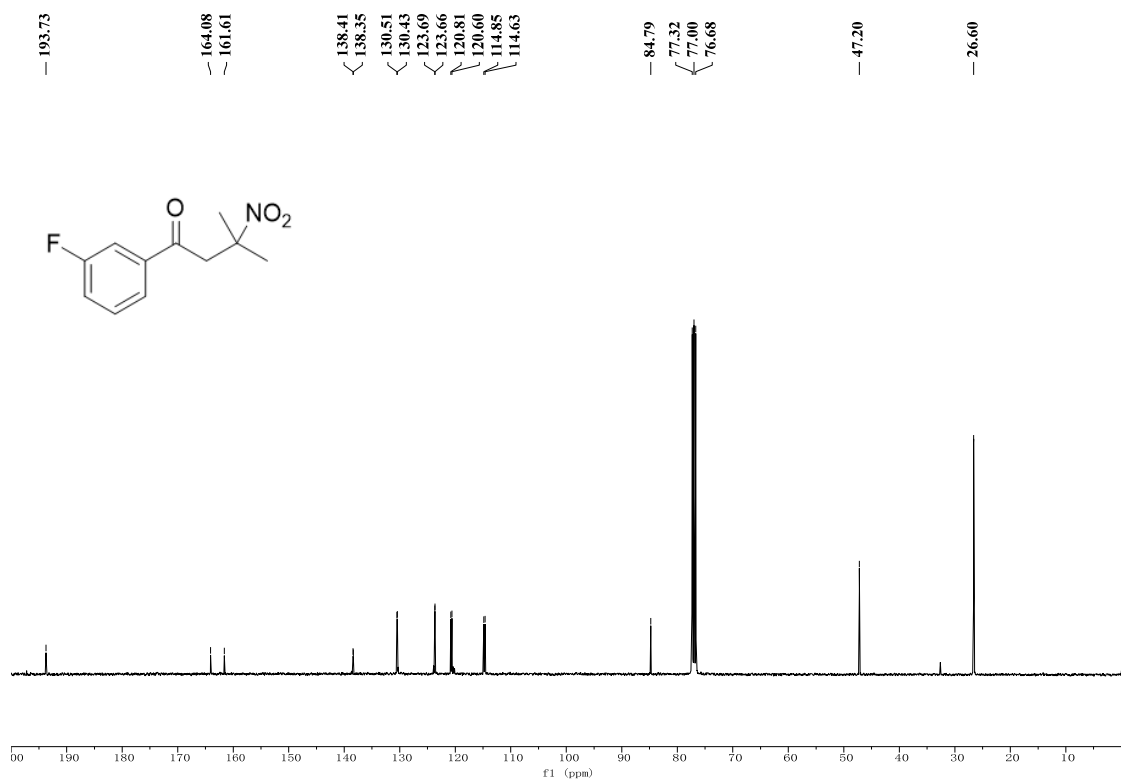

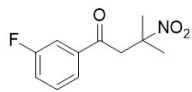

-111.173

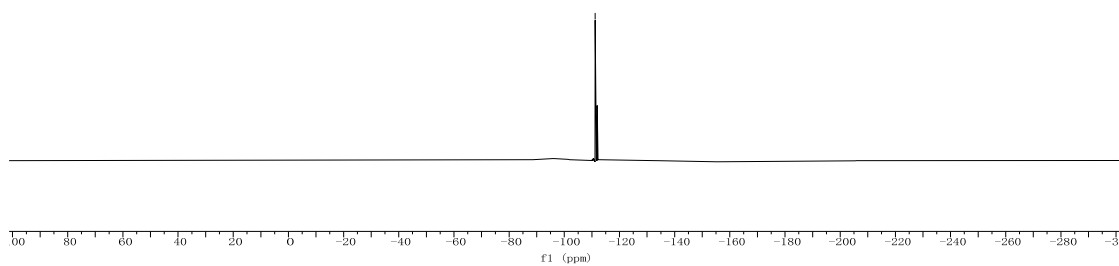

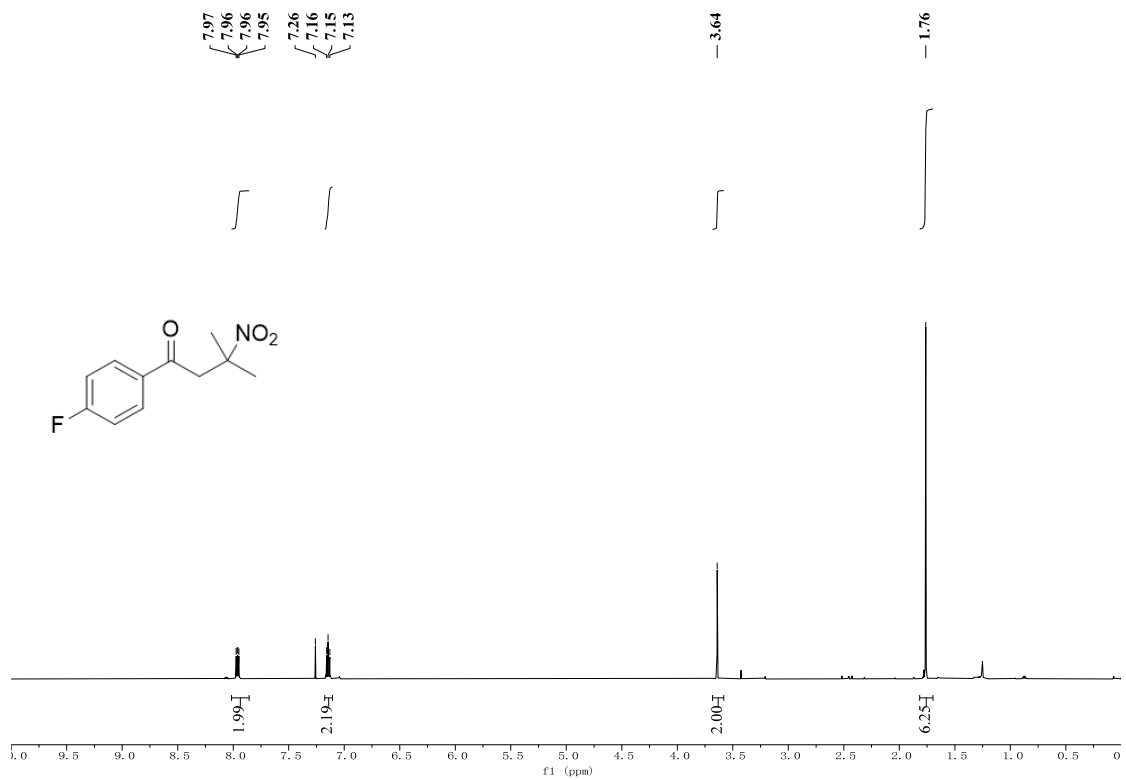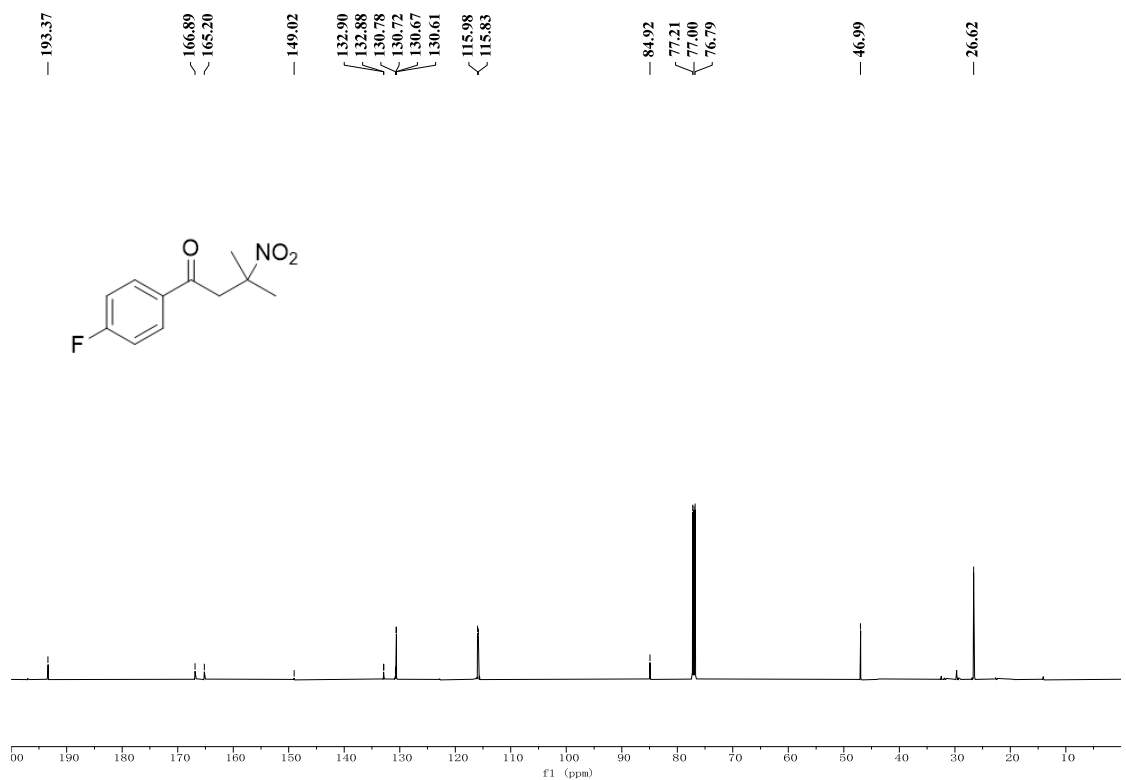

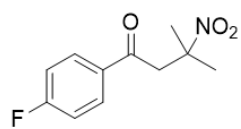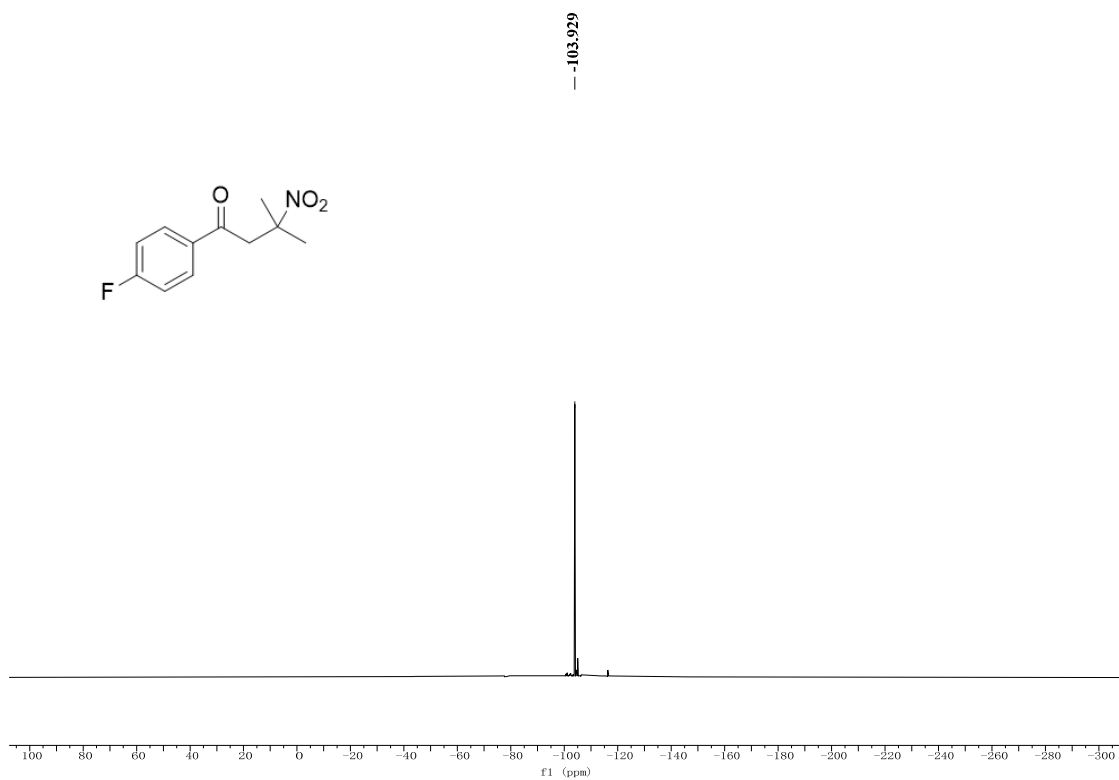

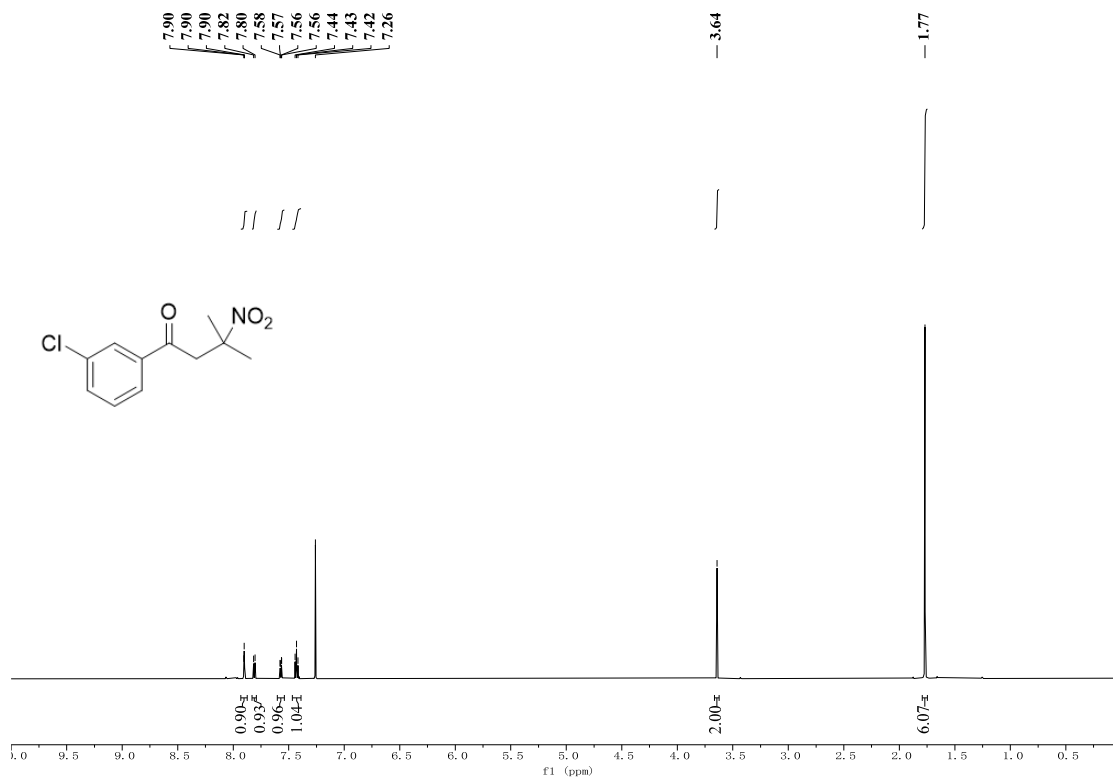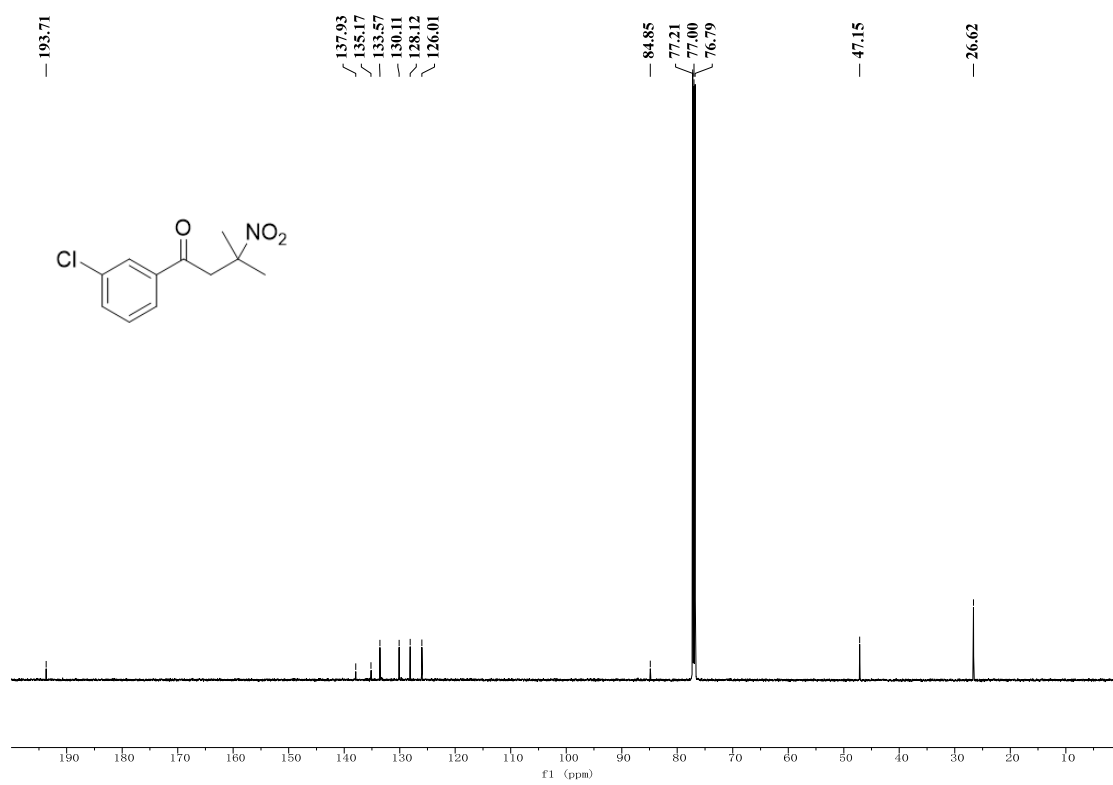

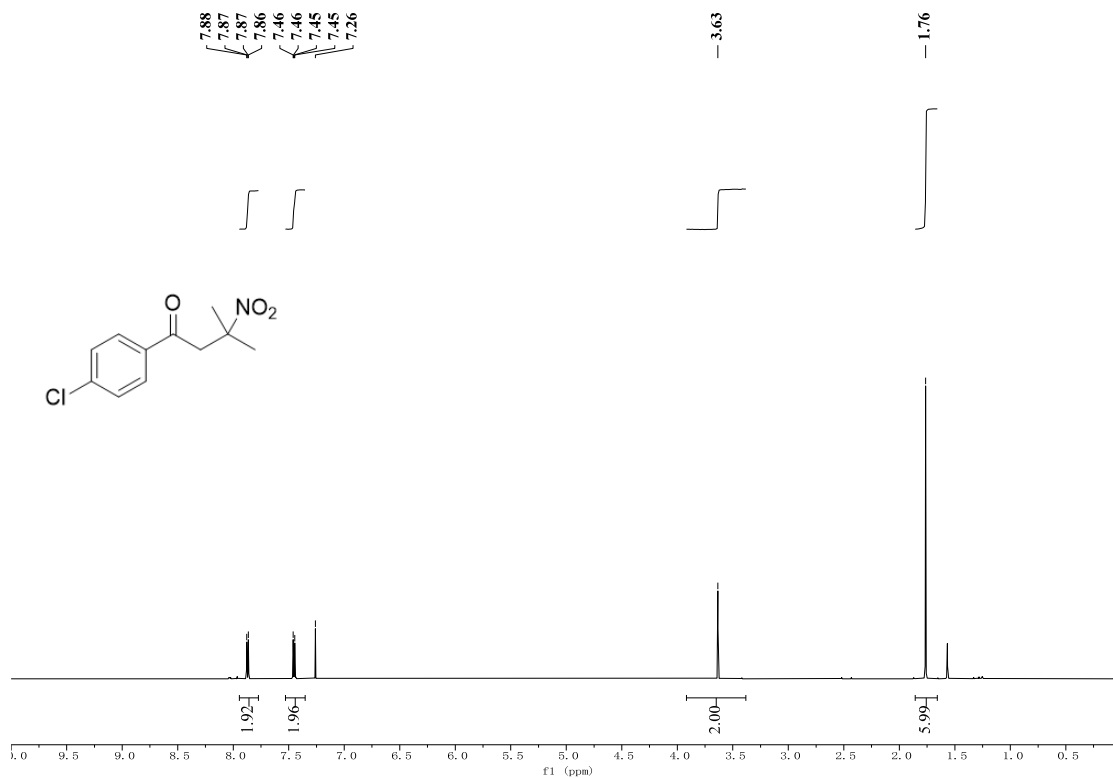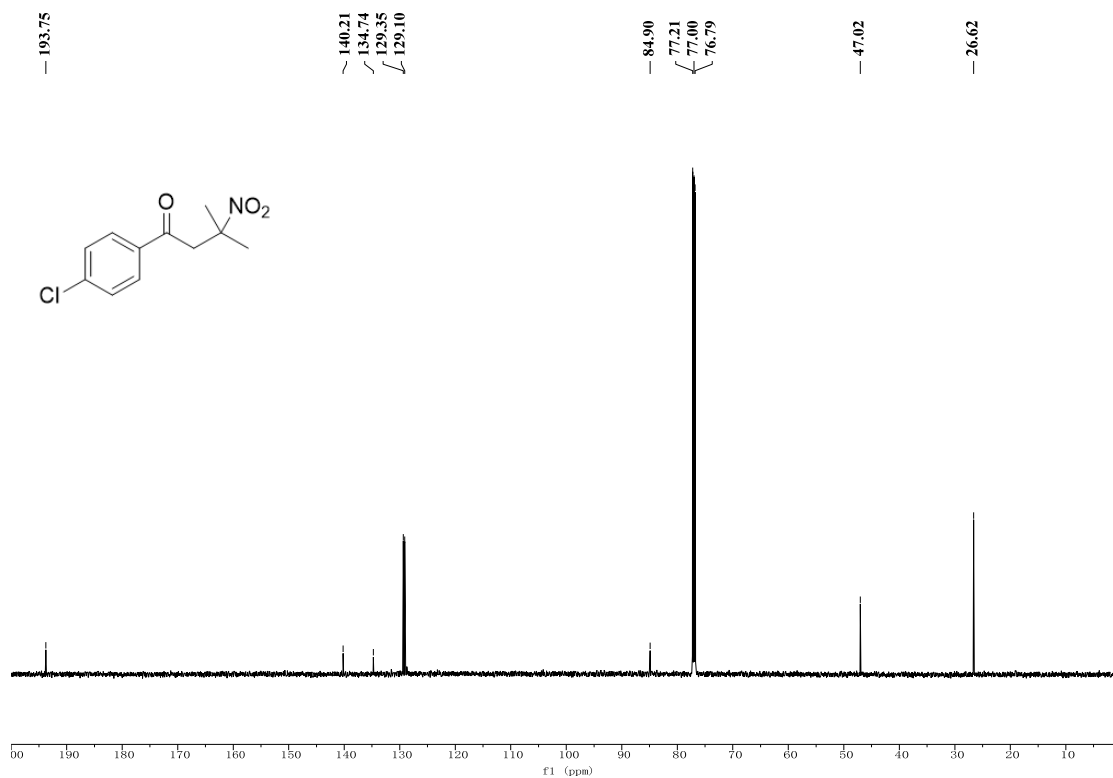

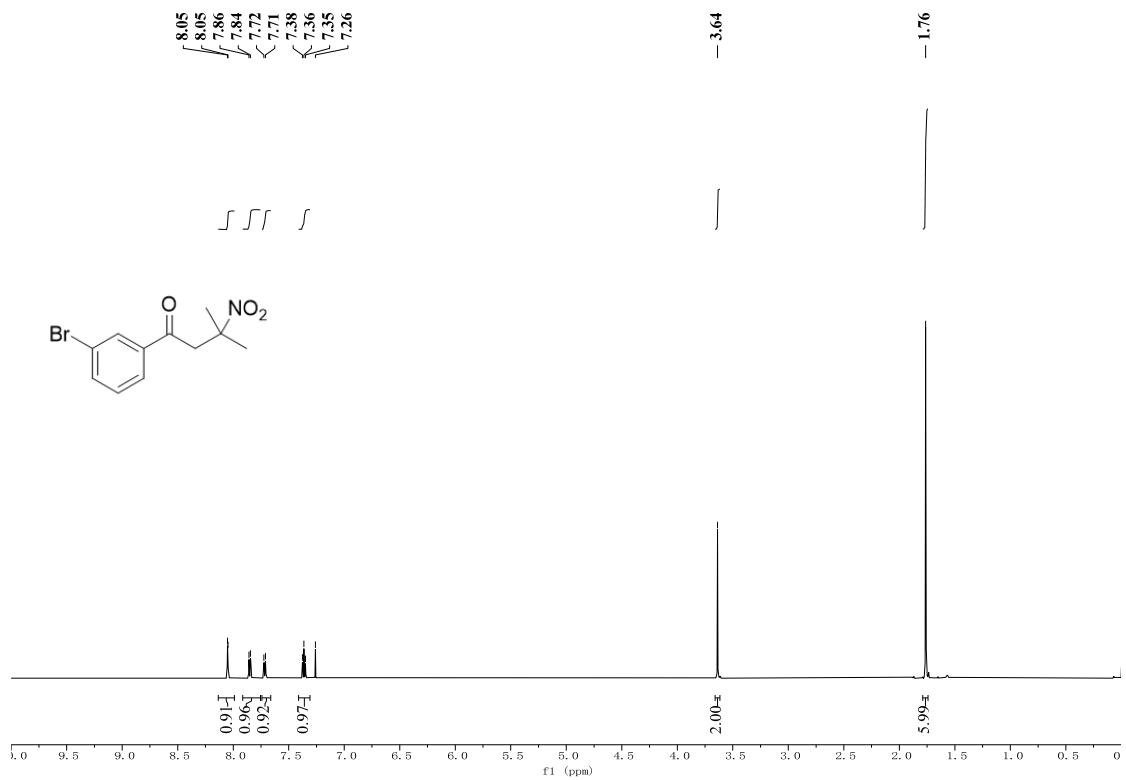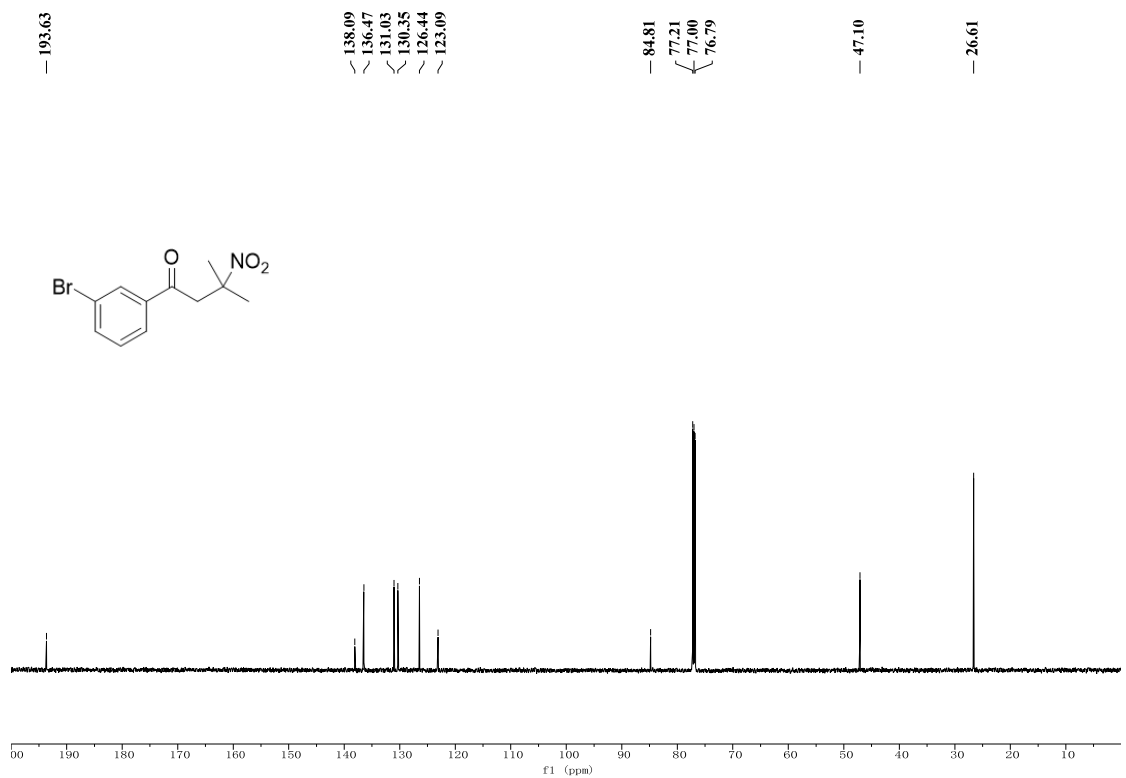

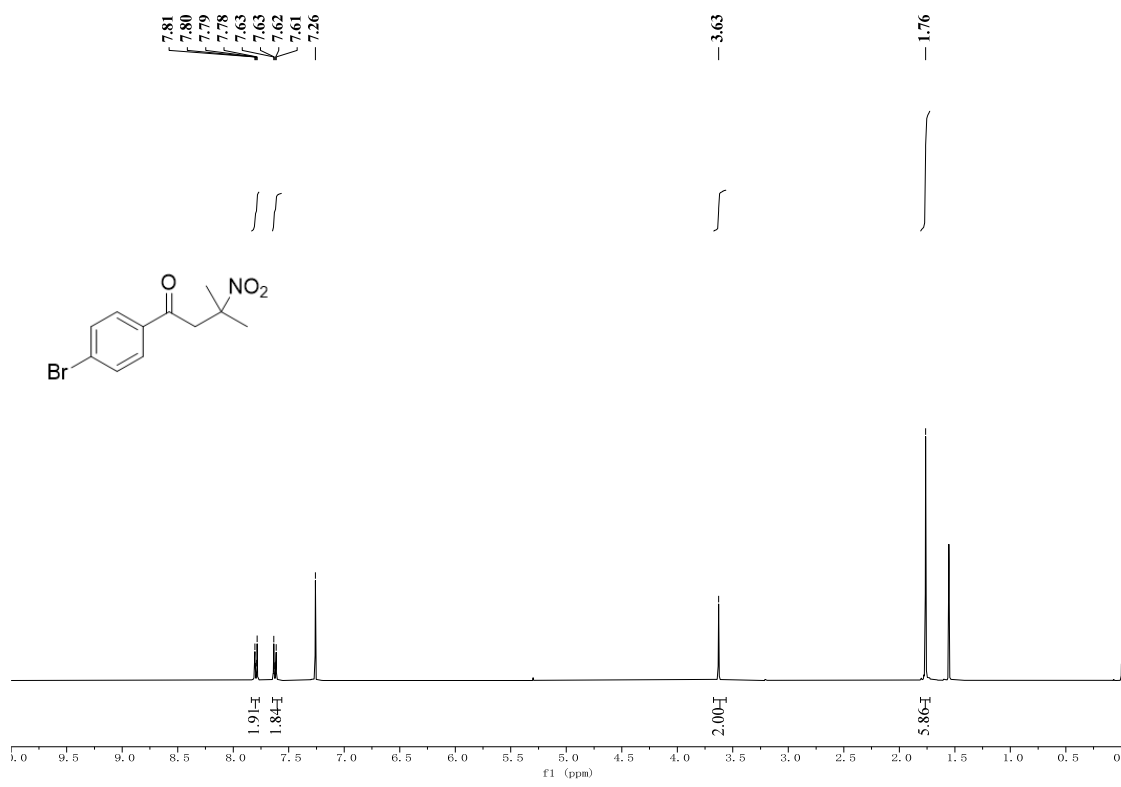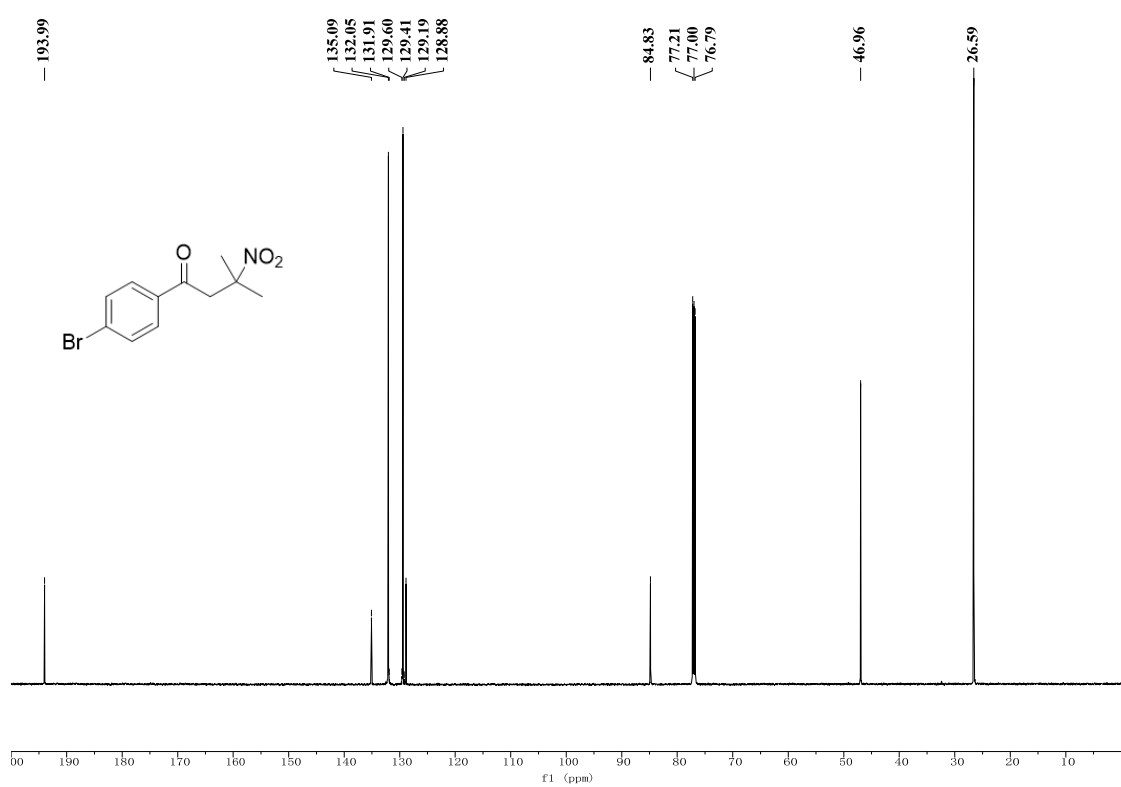



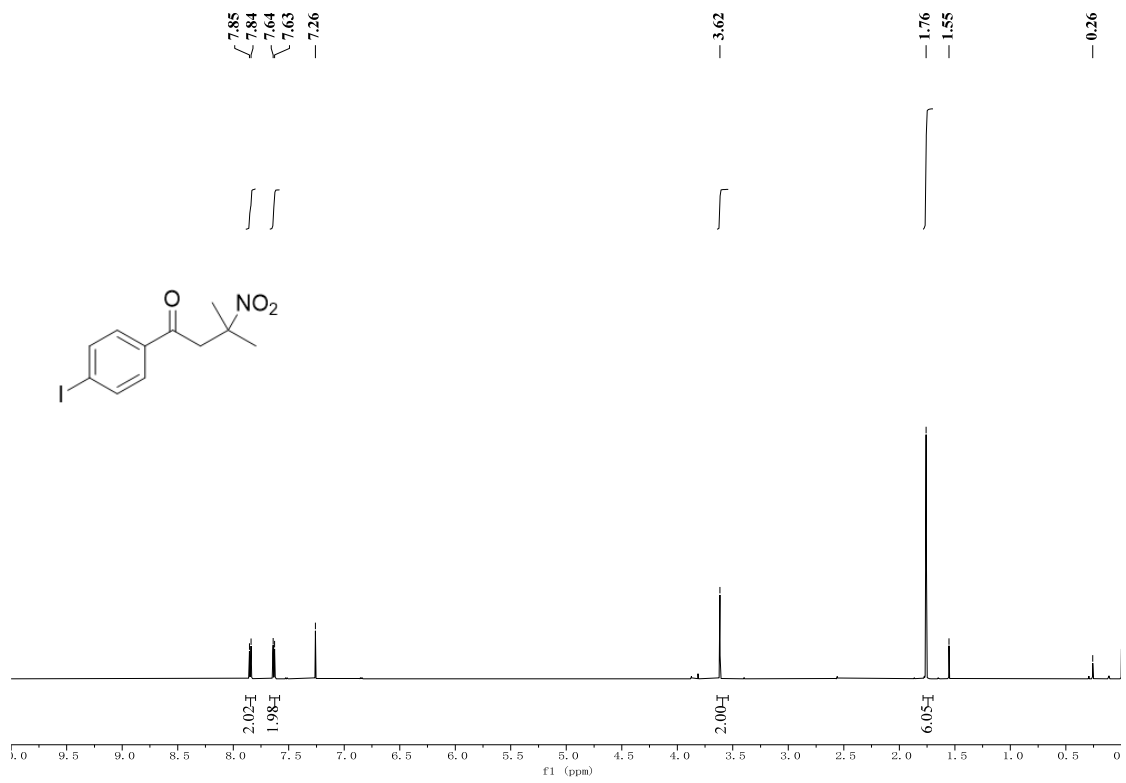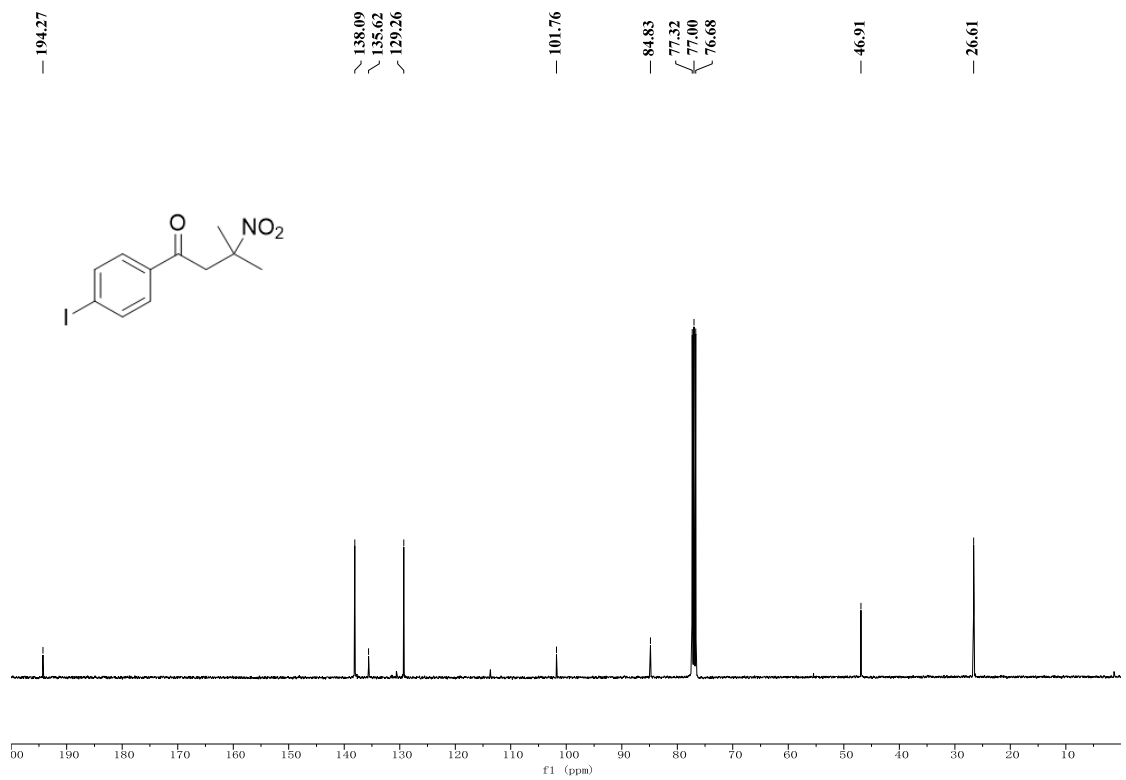

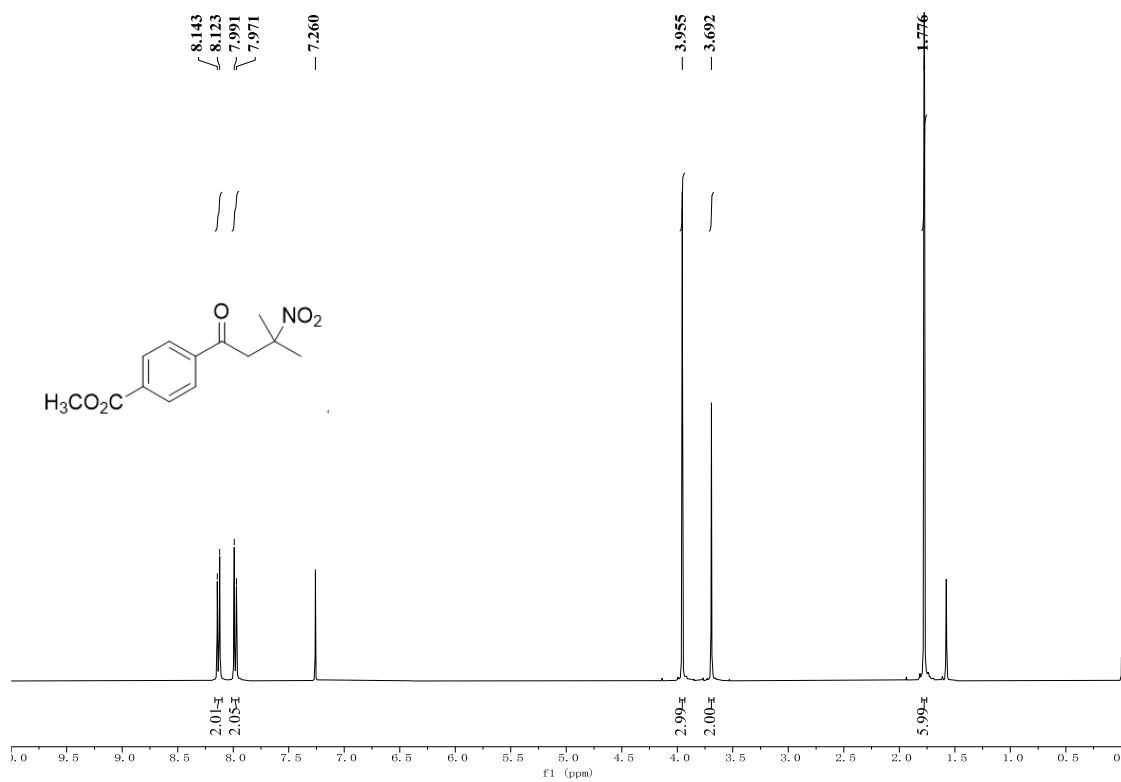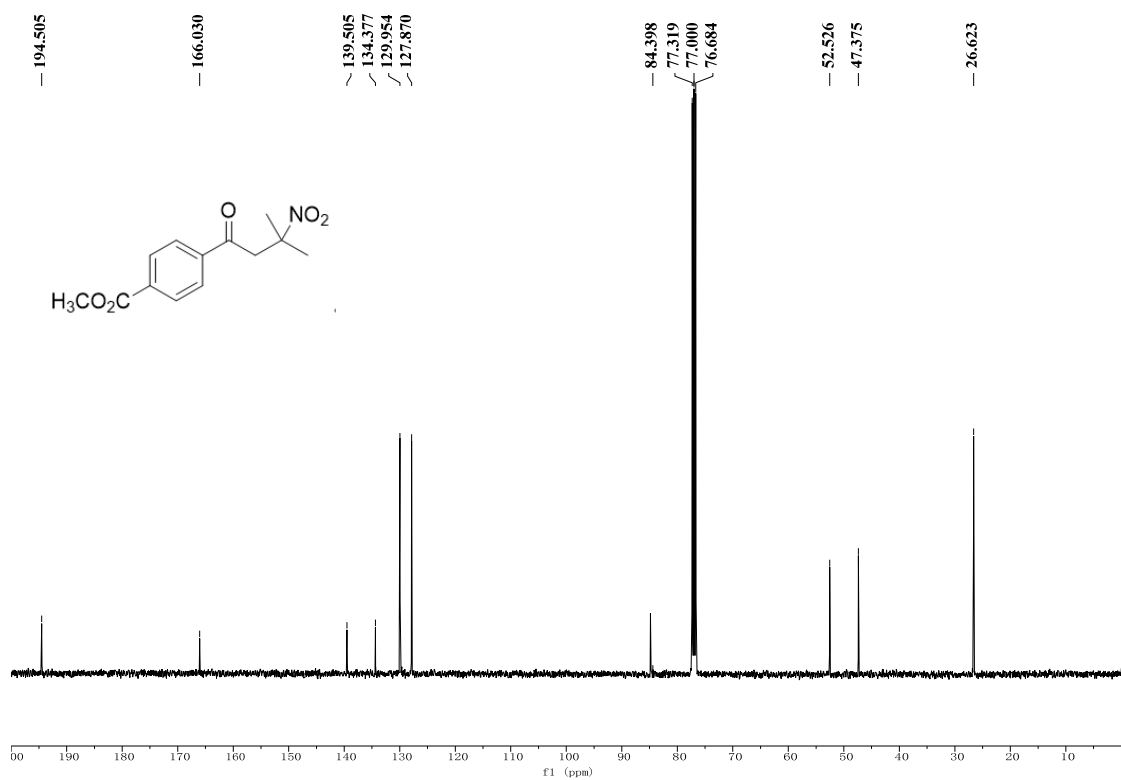

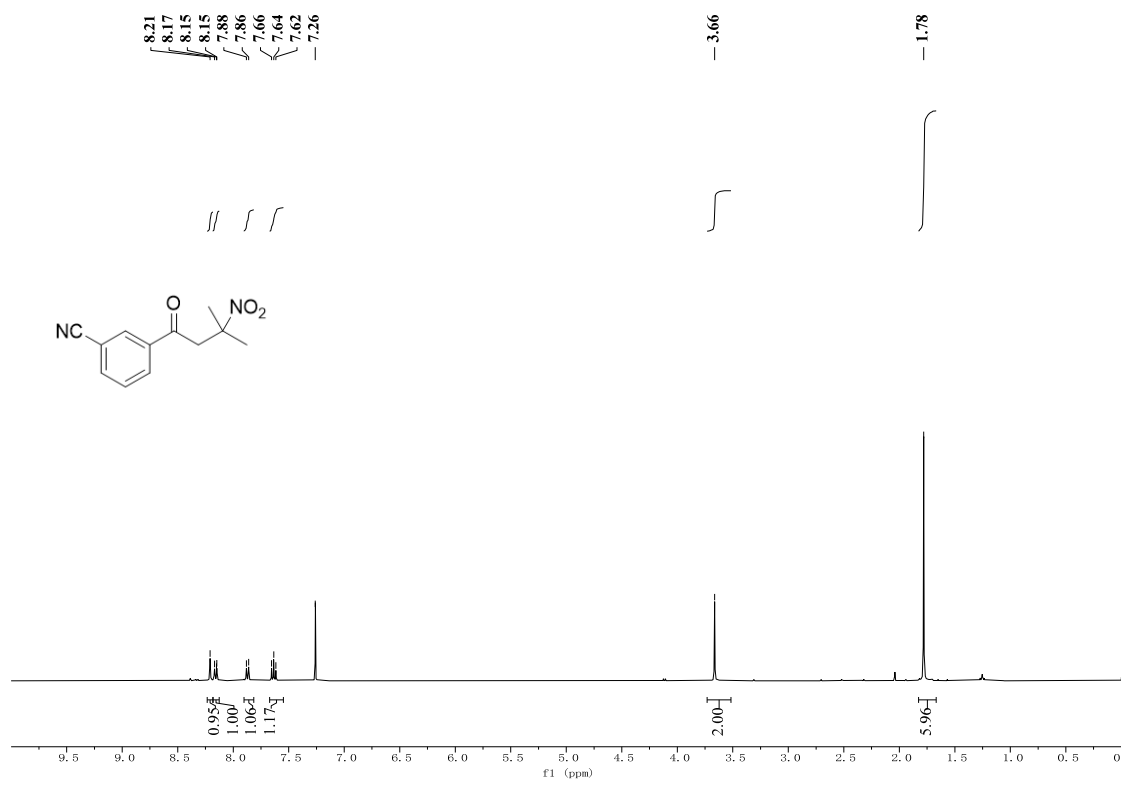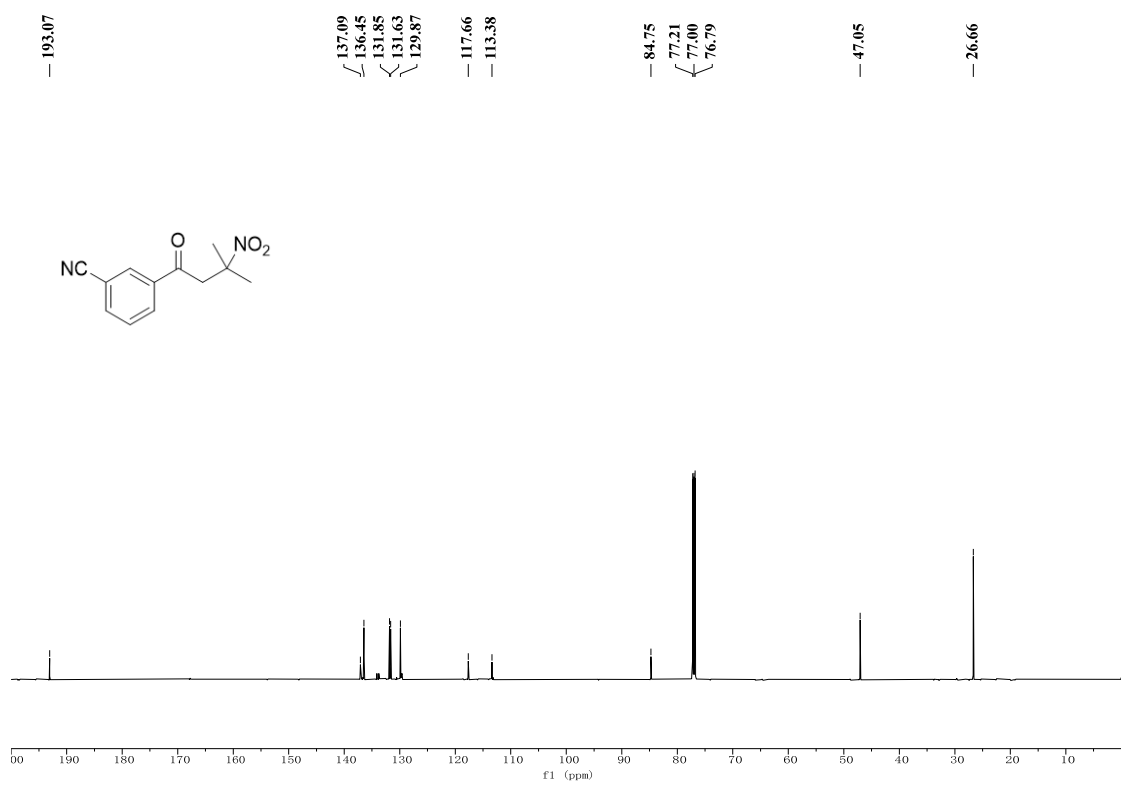

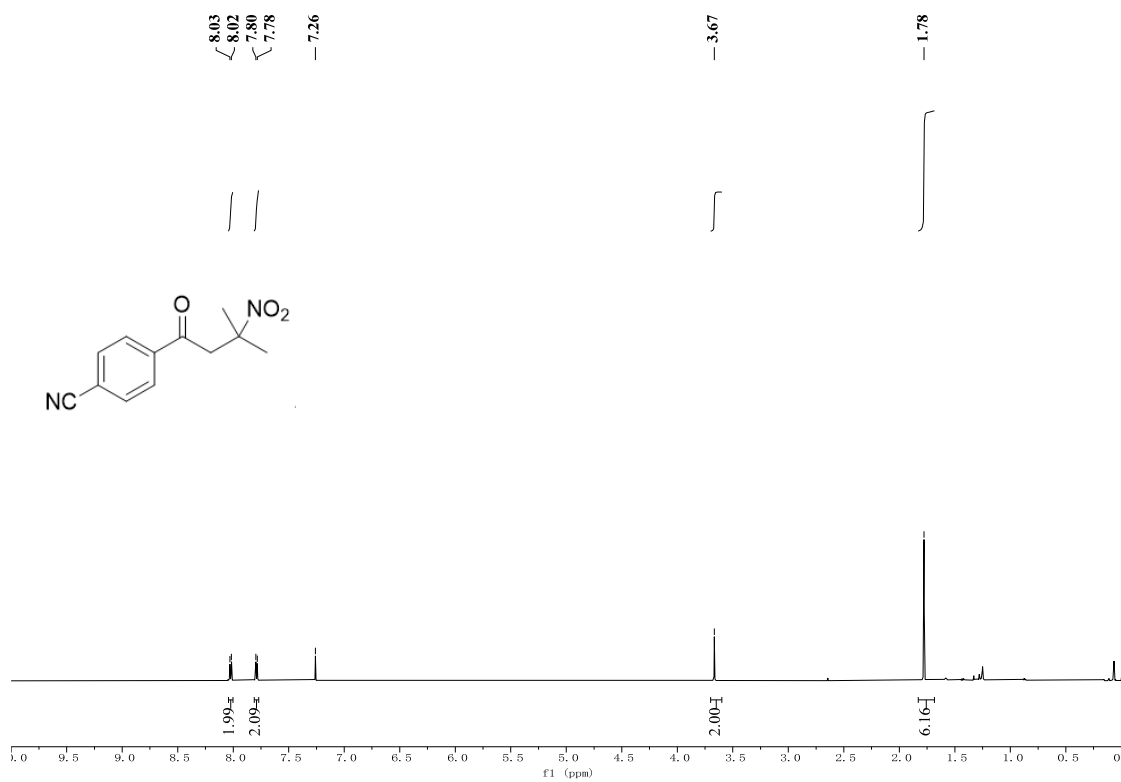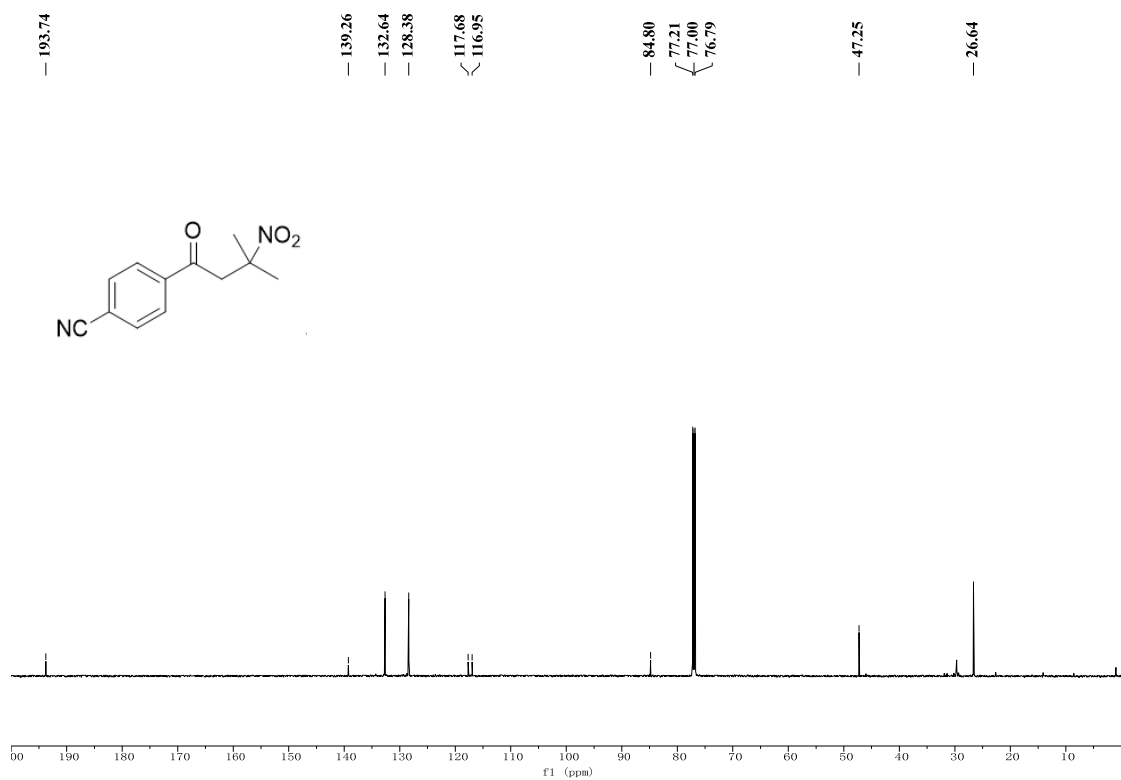

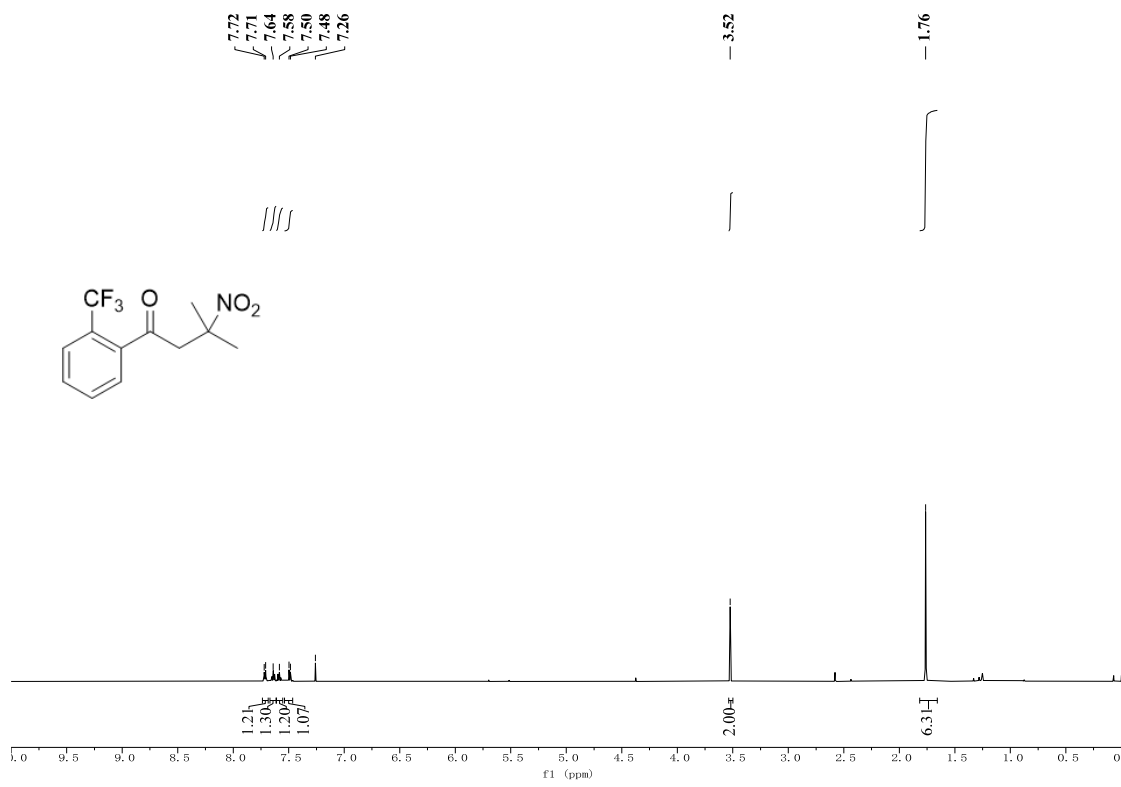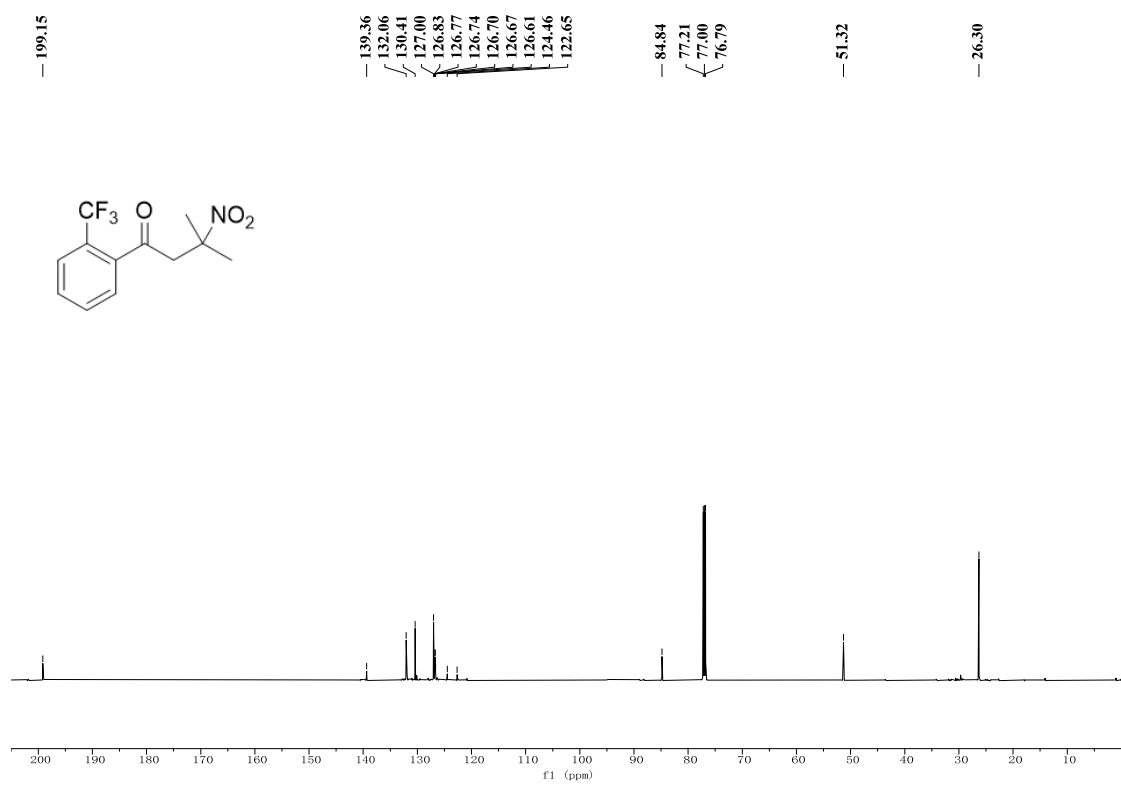

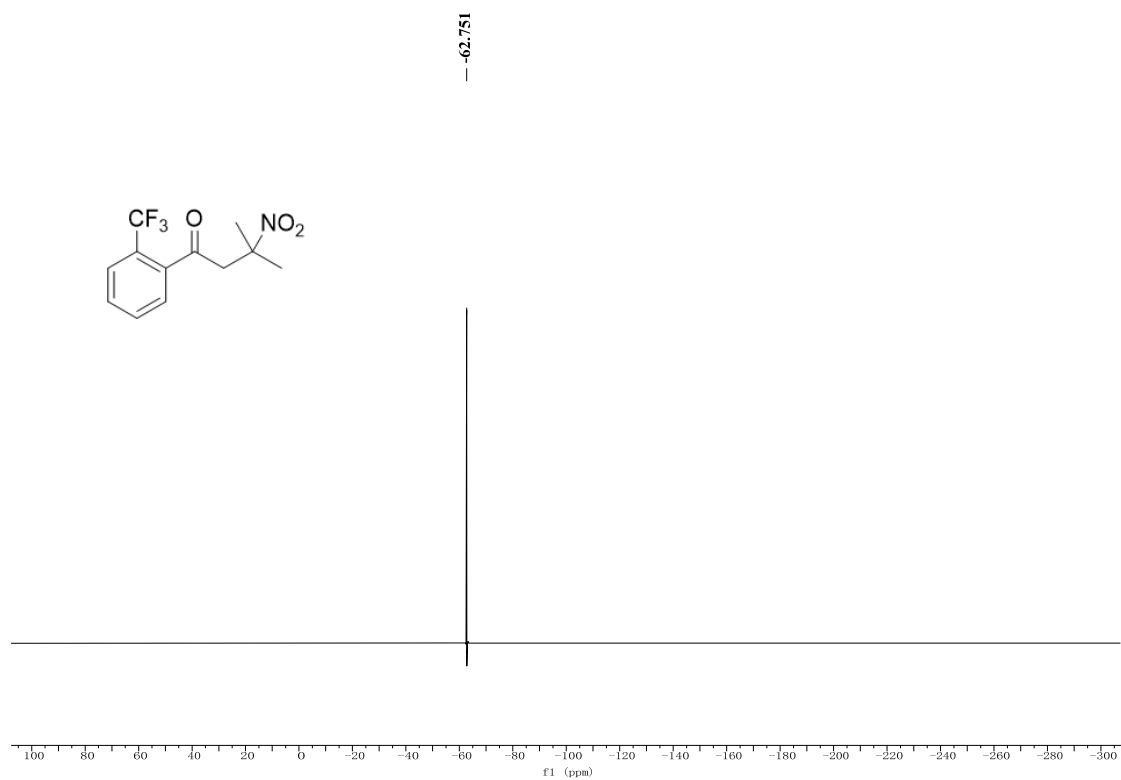

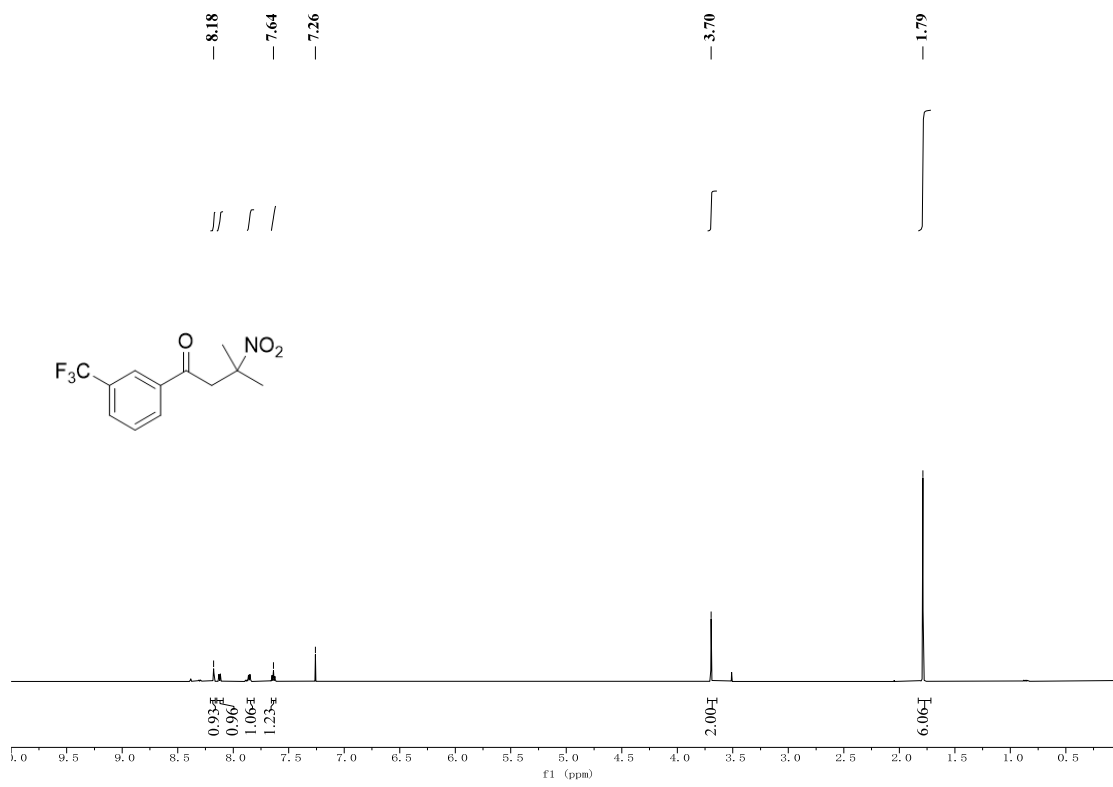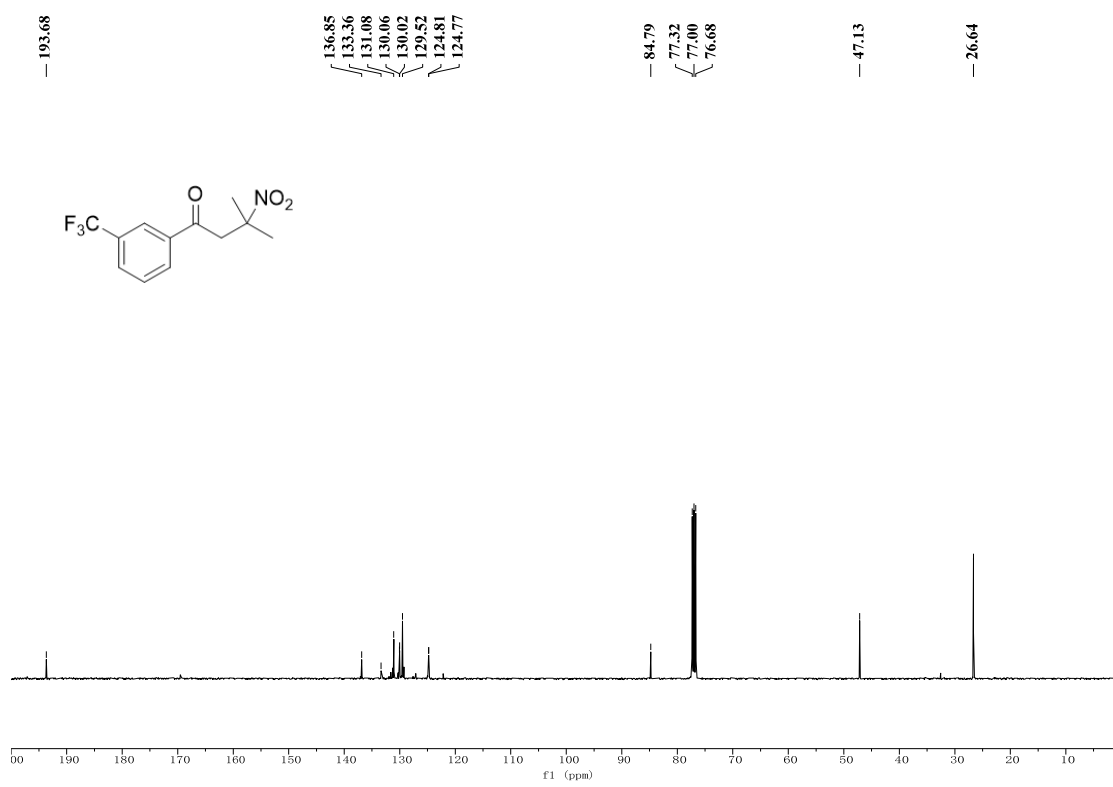

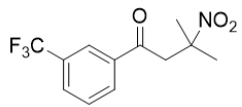

-62.751

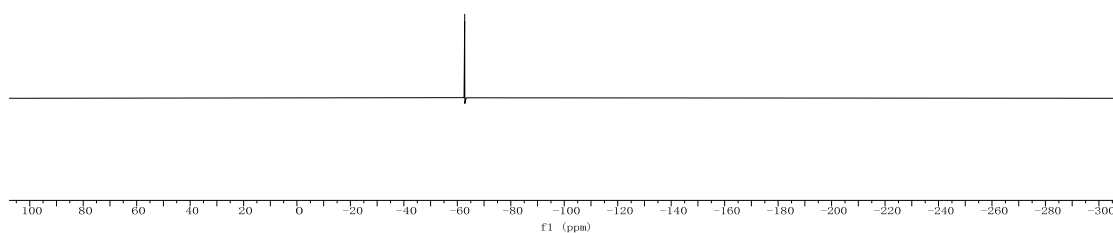



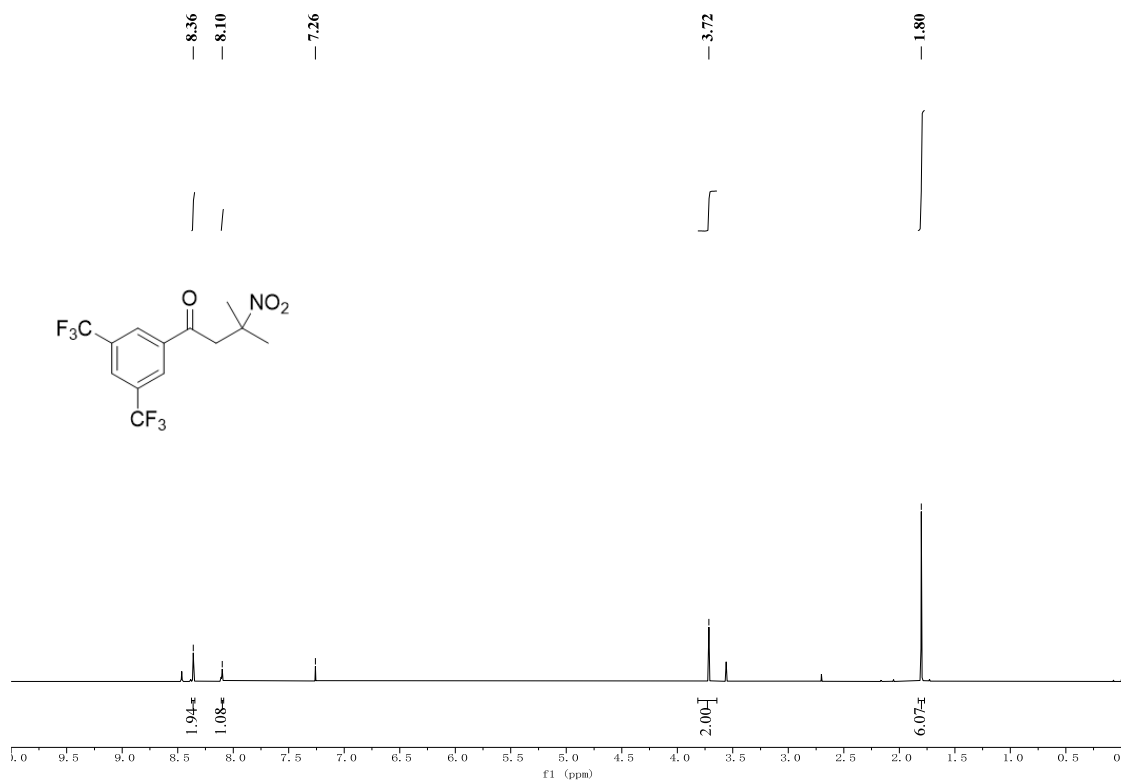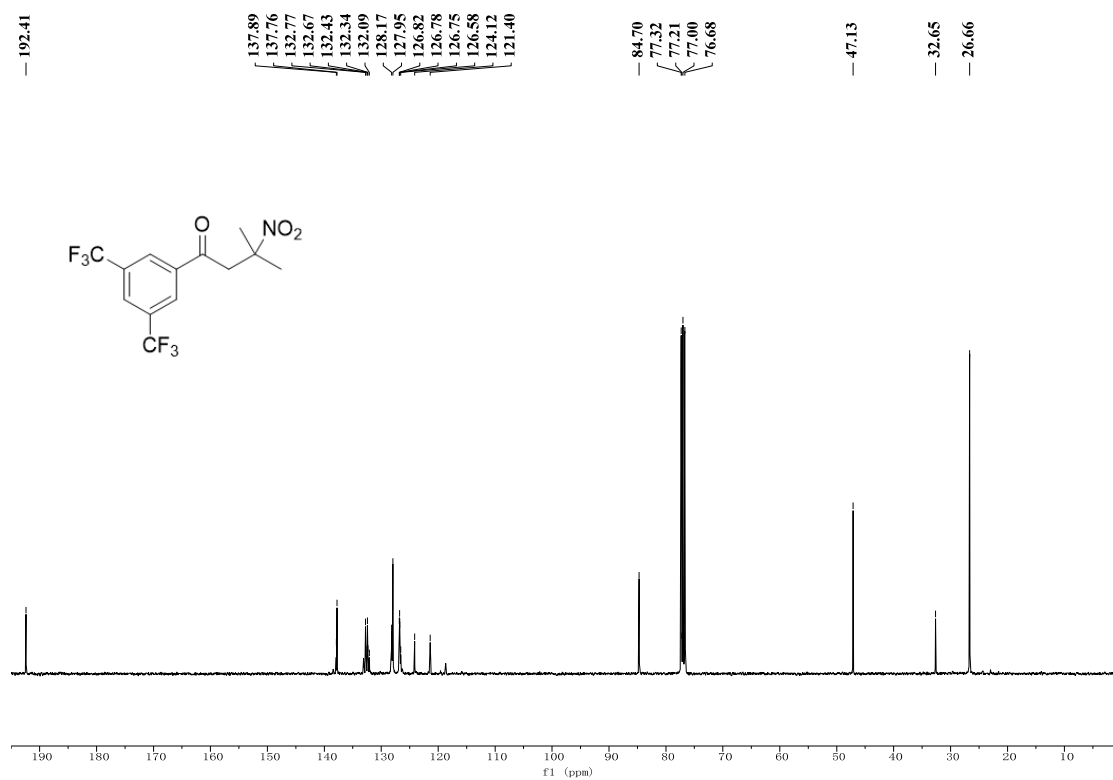

-62.924

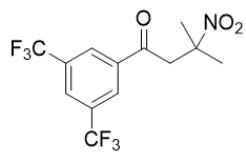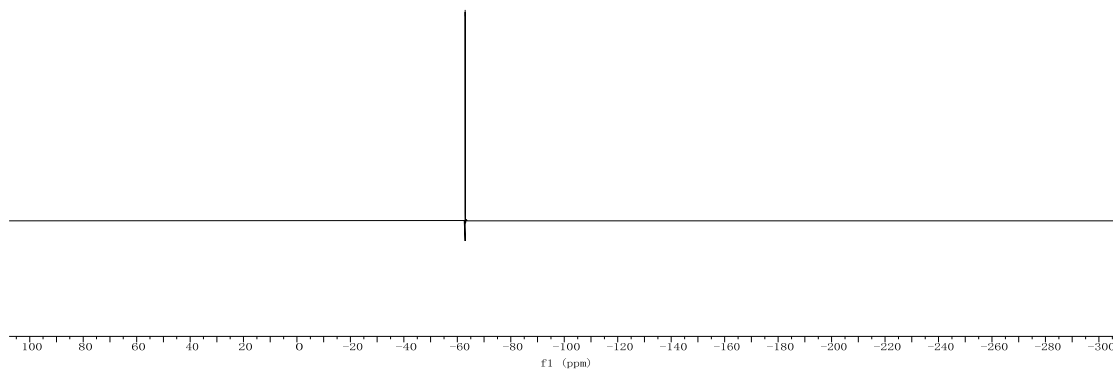

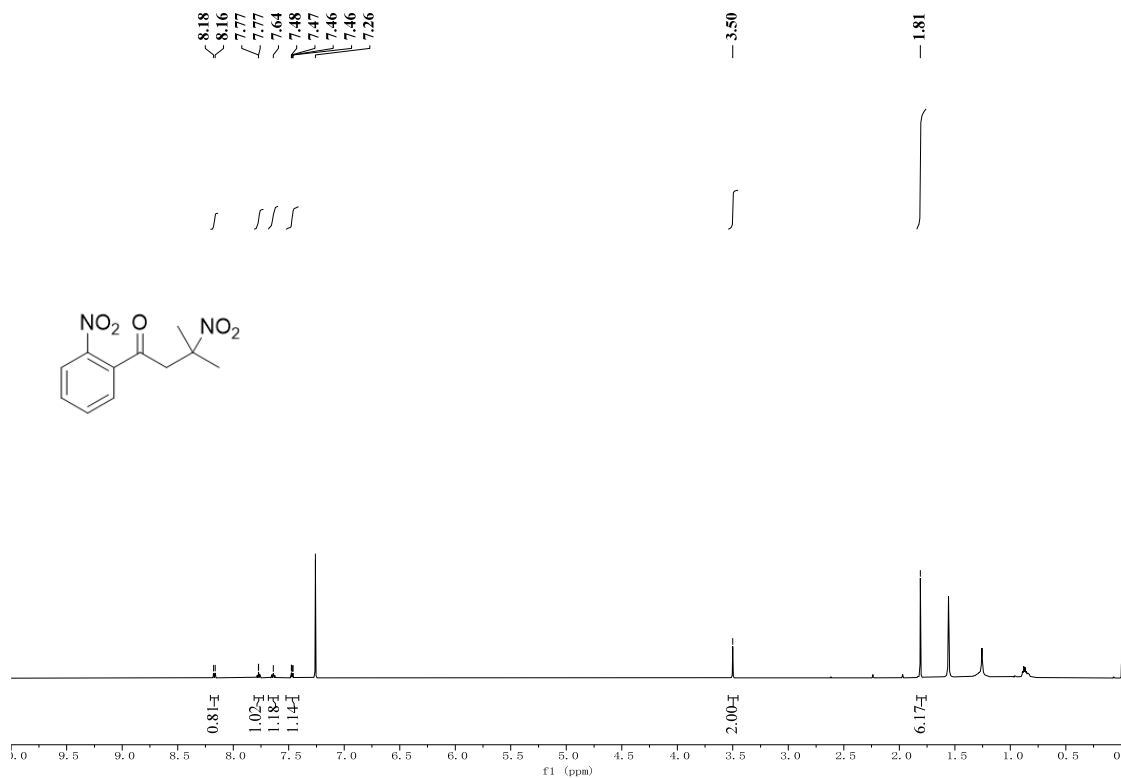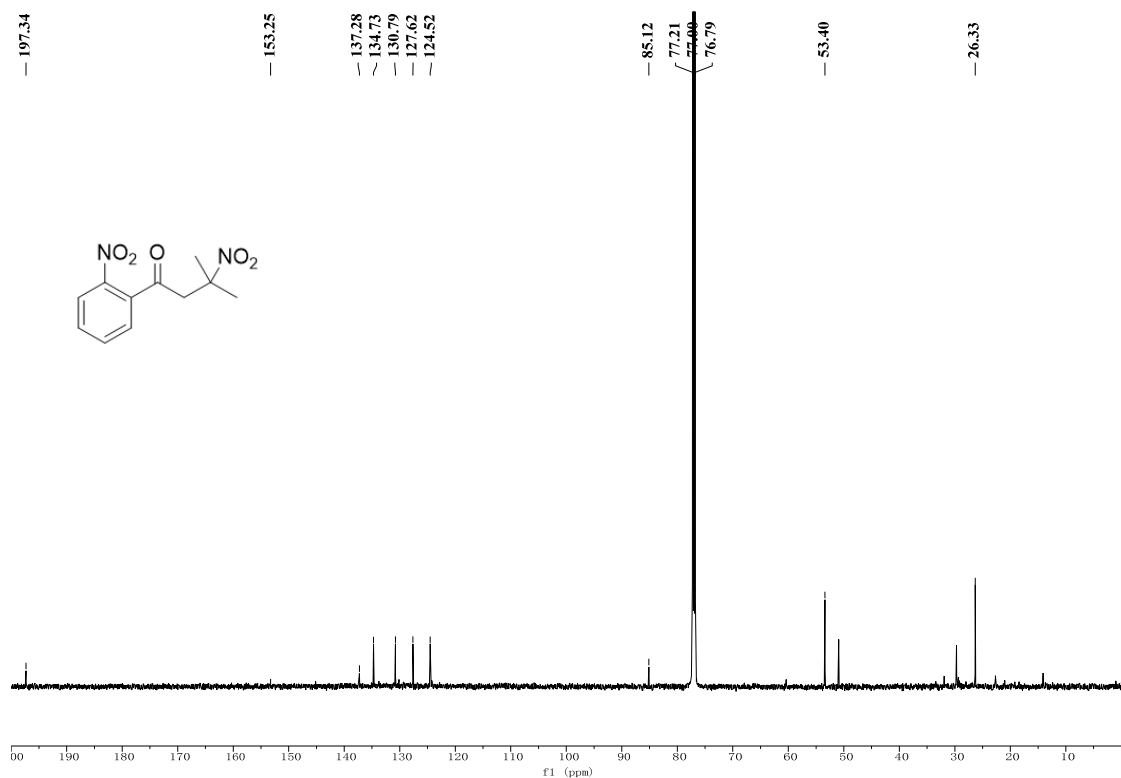

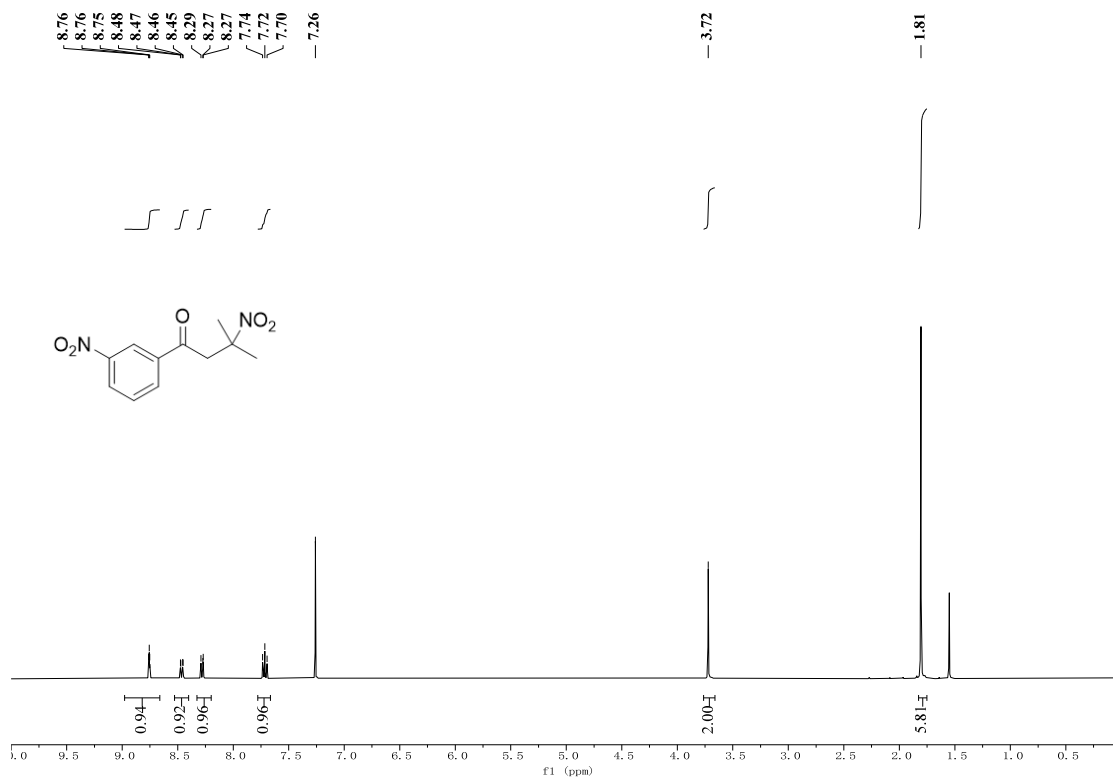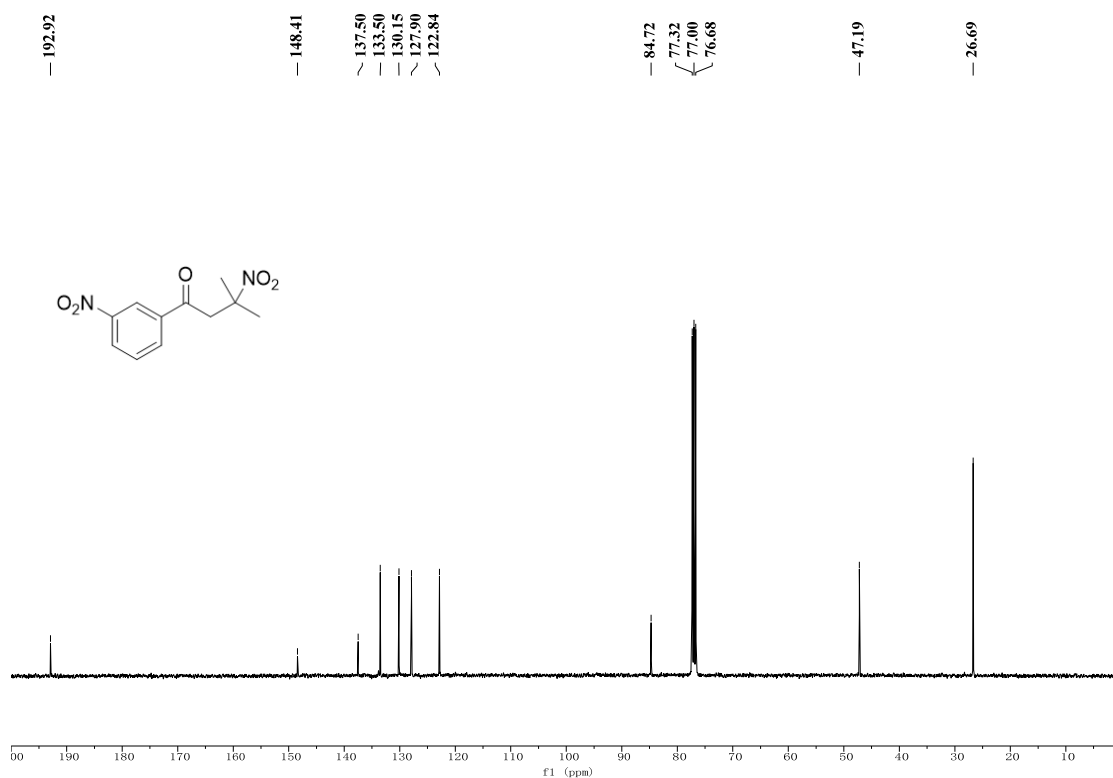

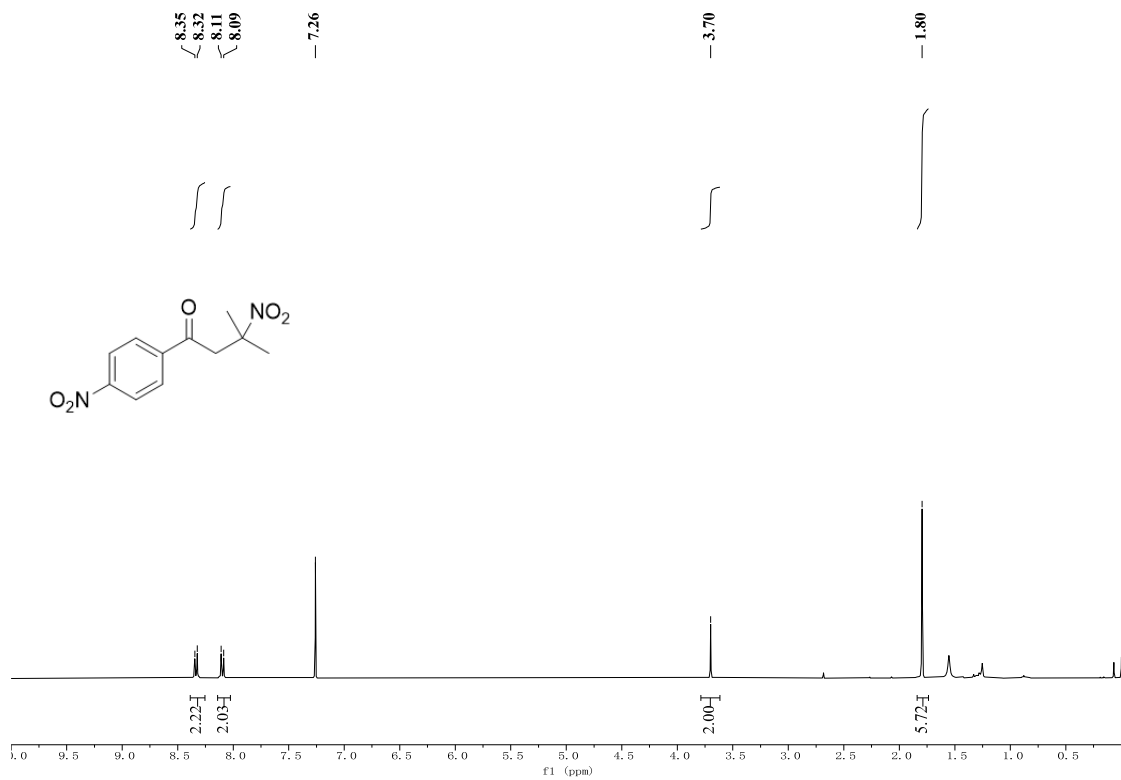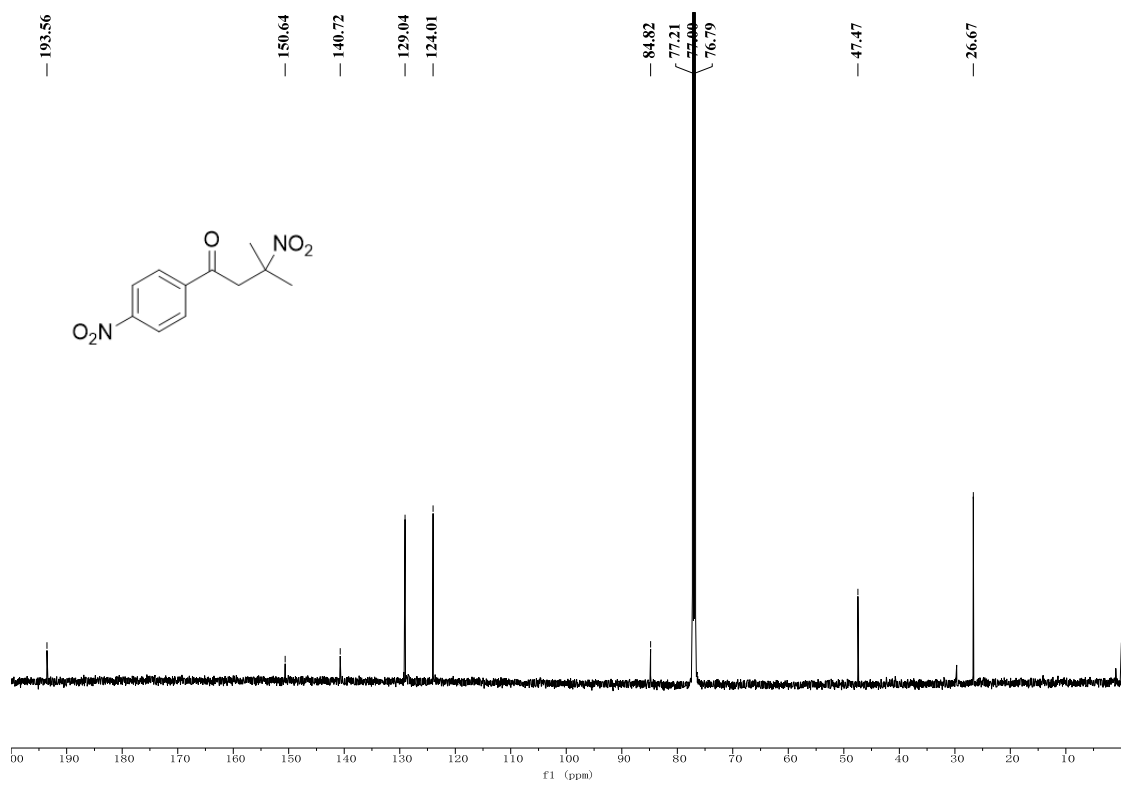

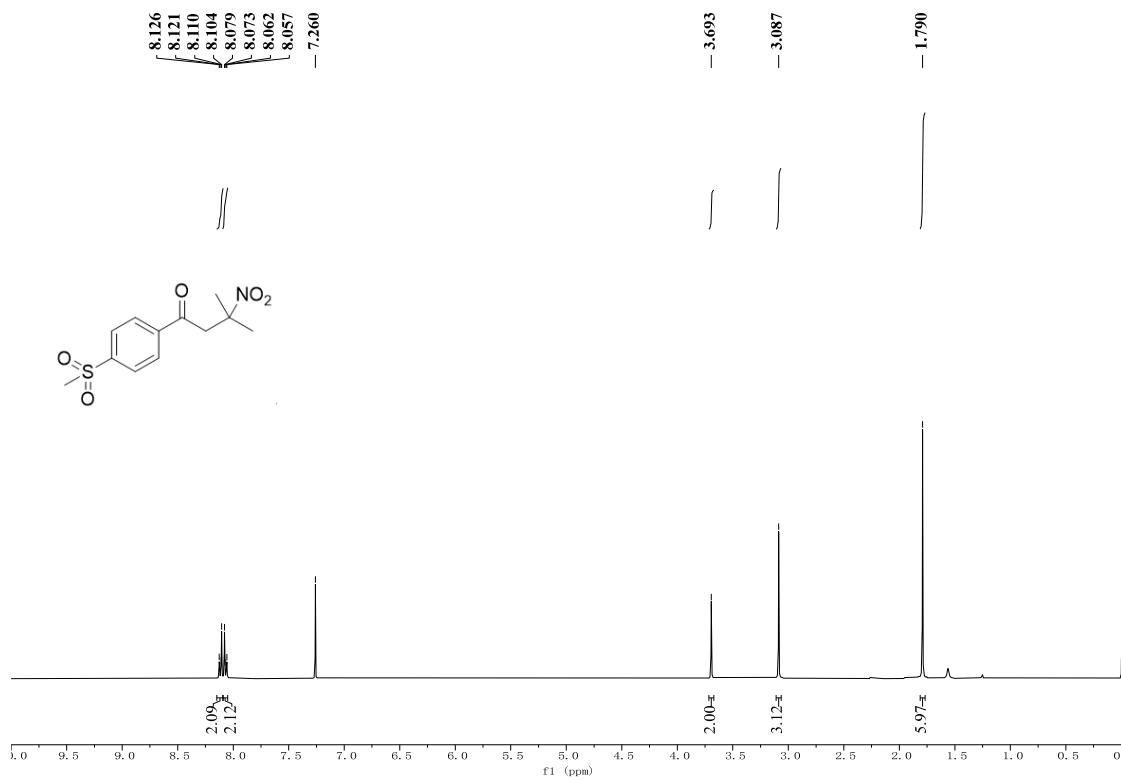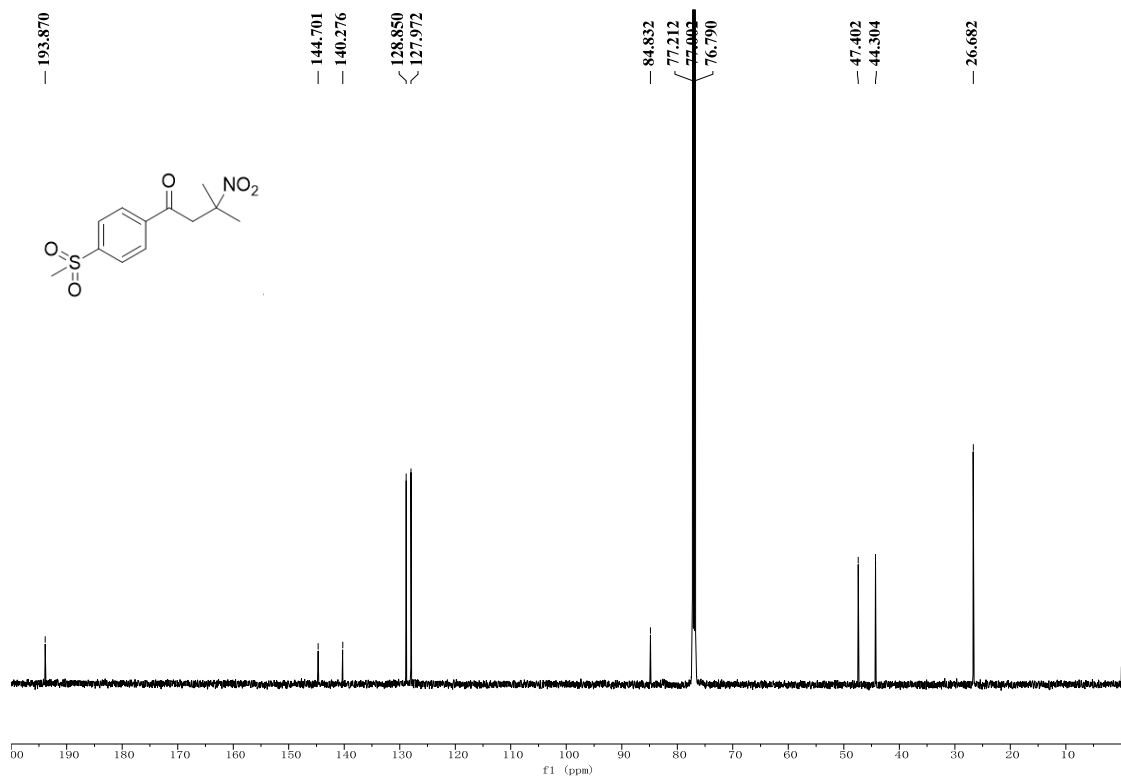

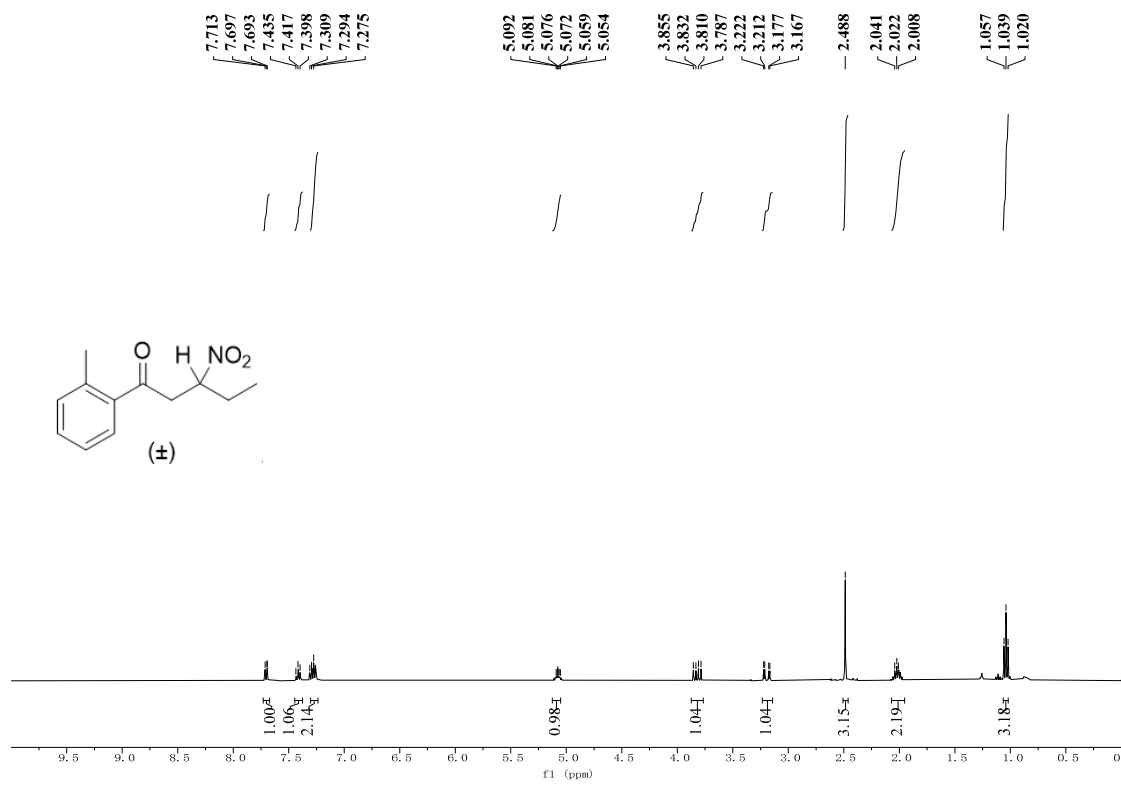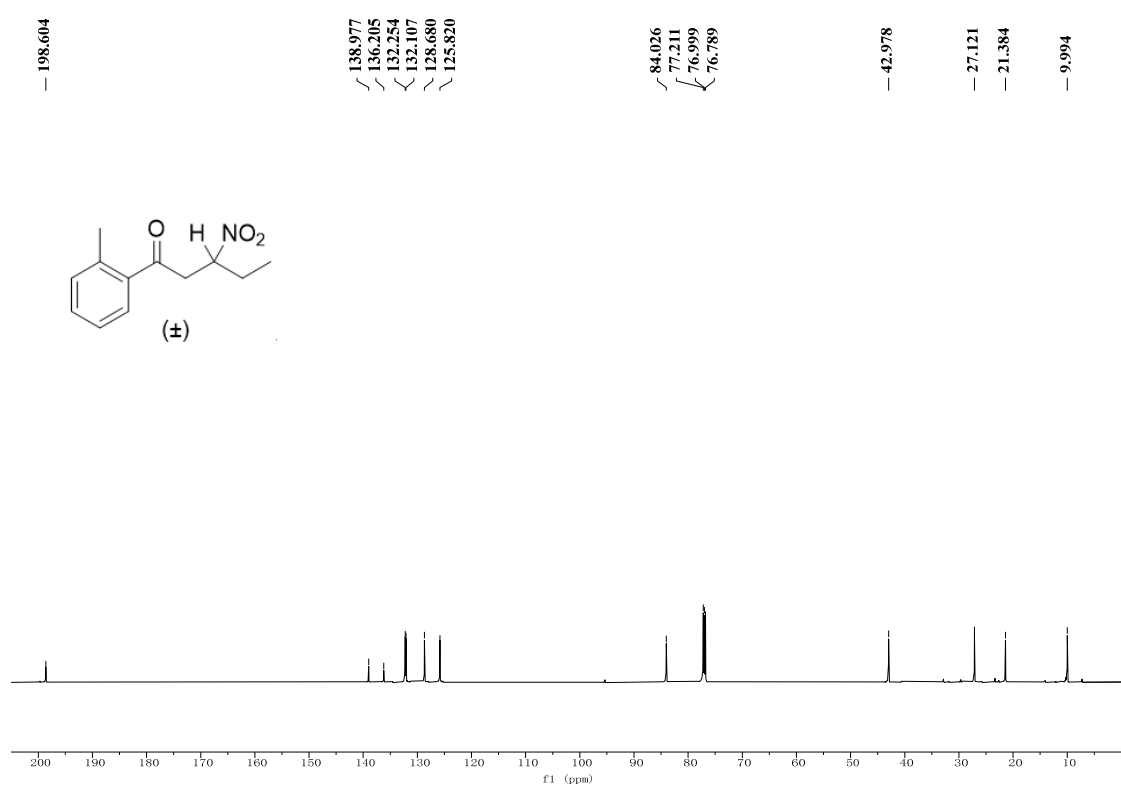

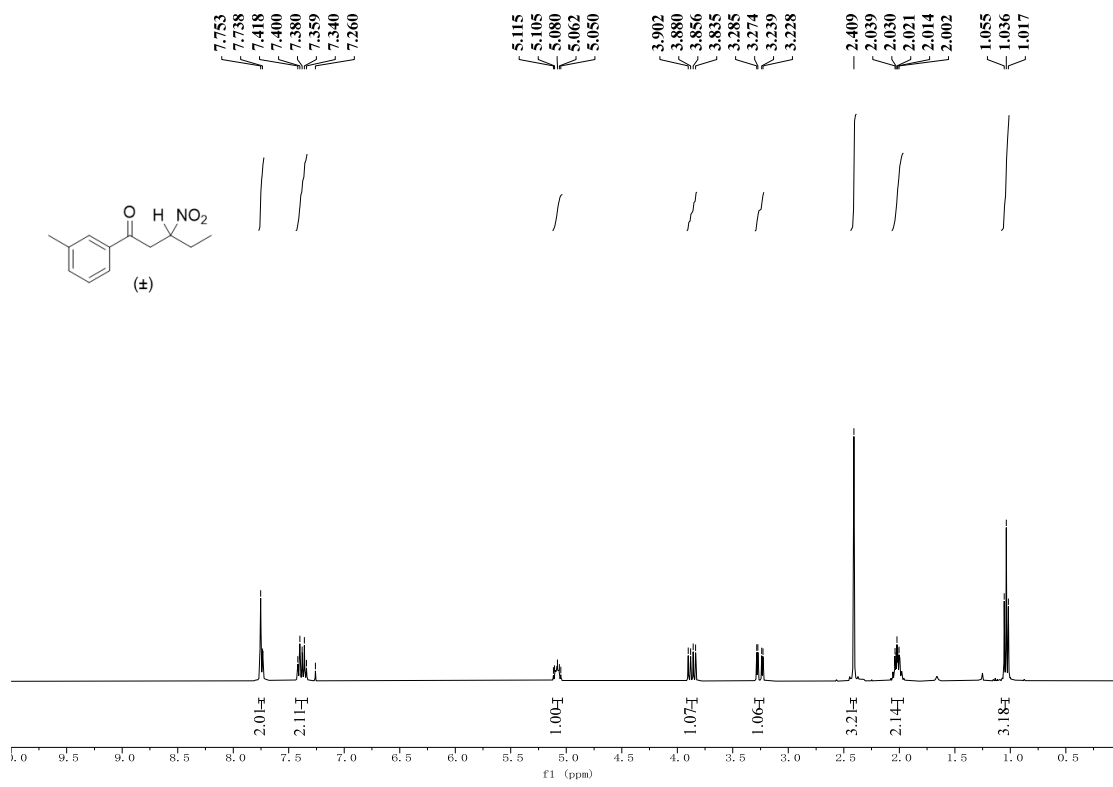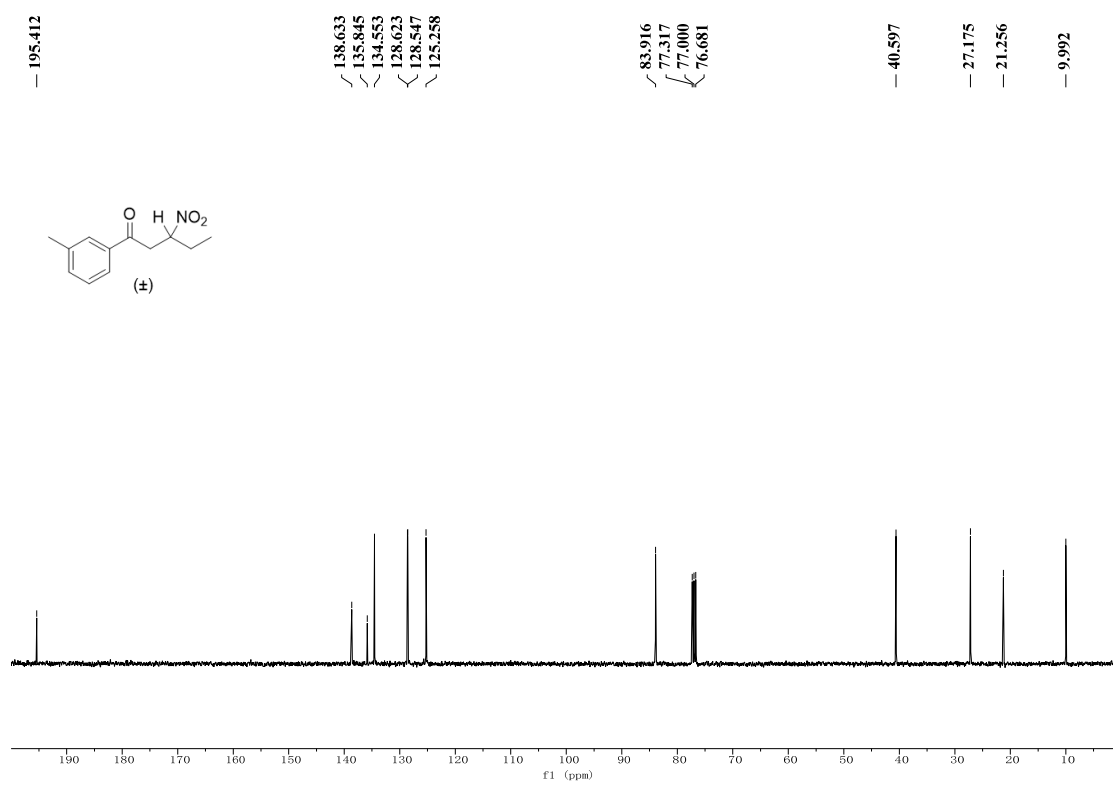



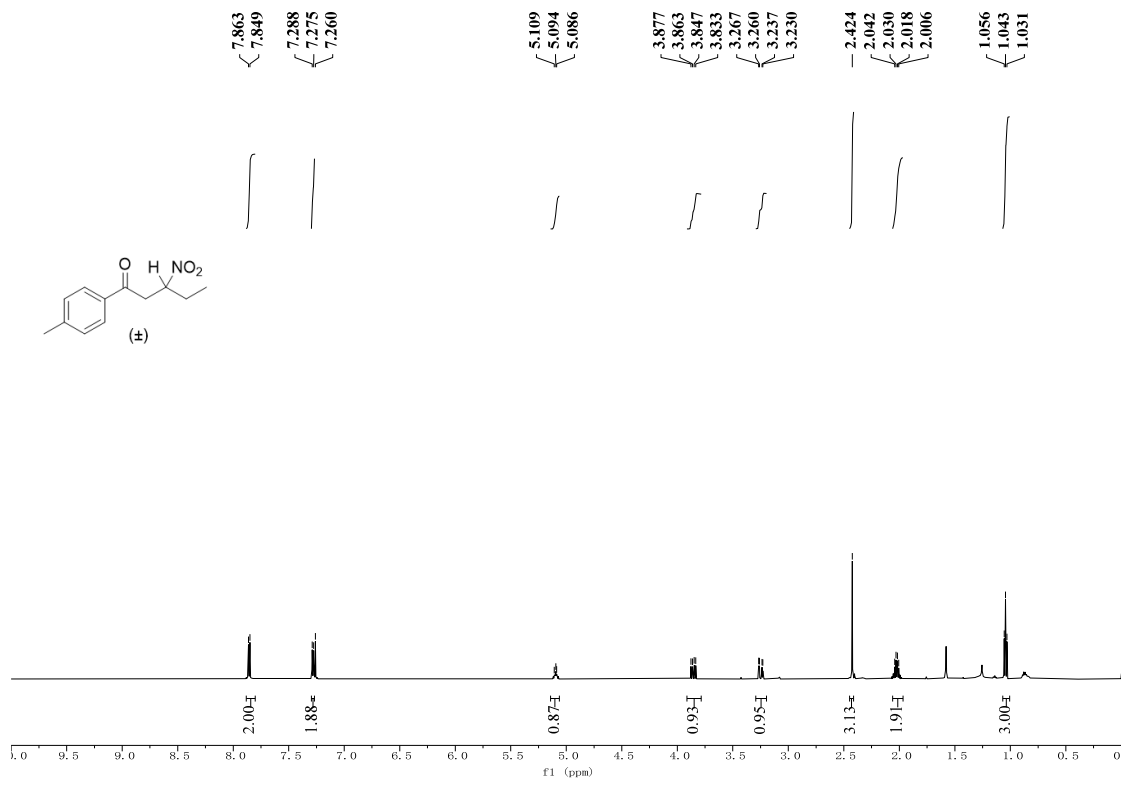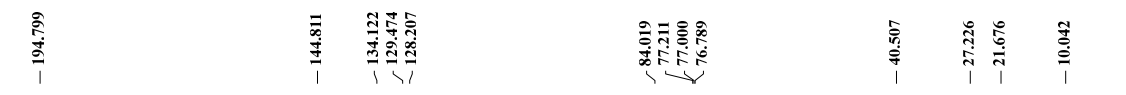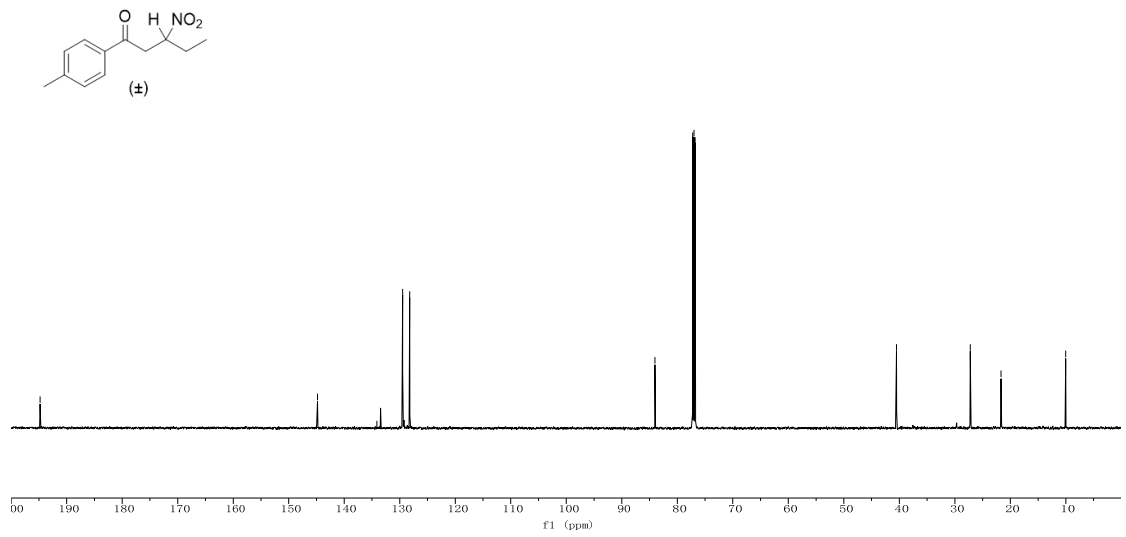

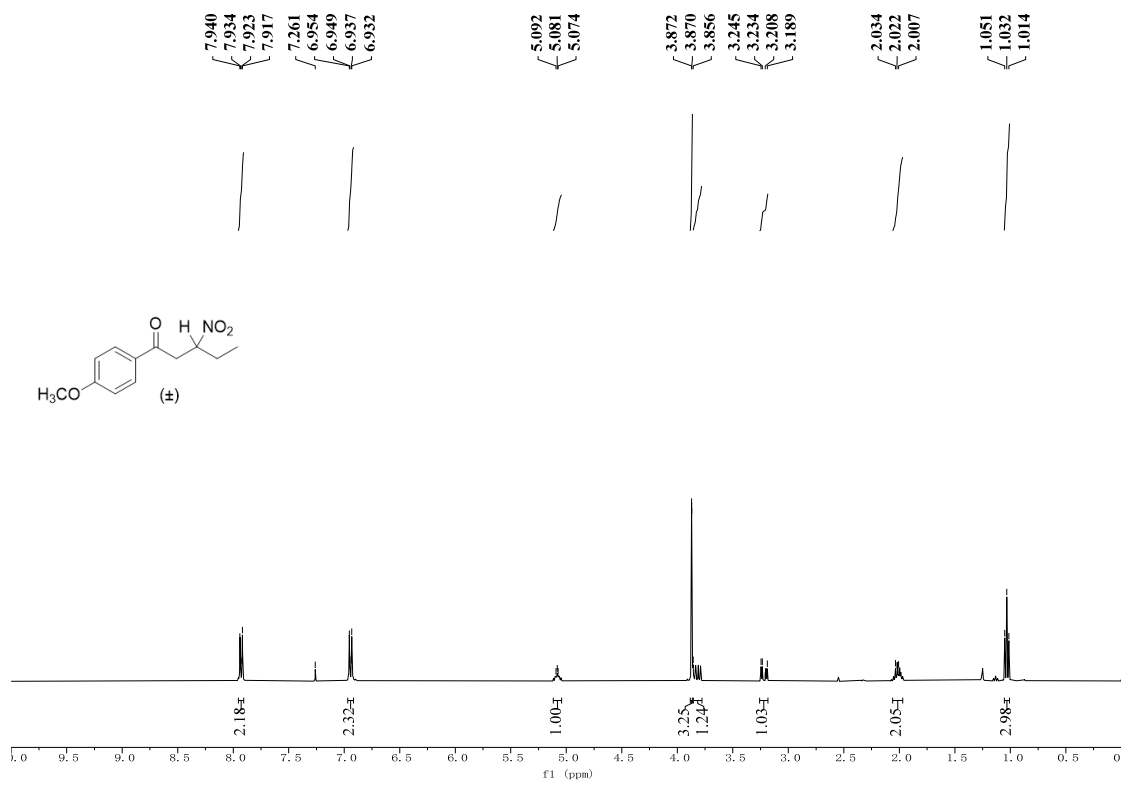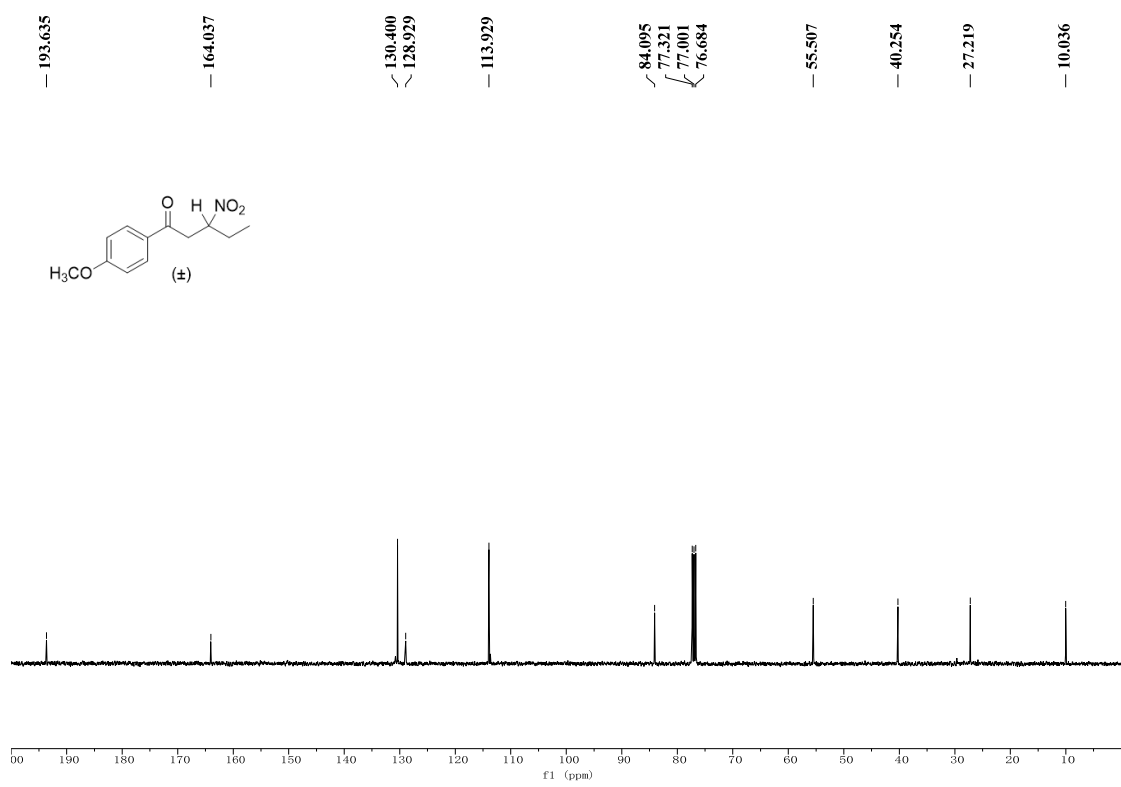

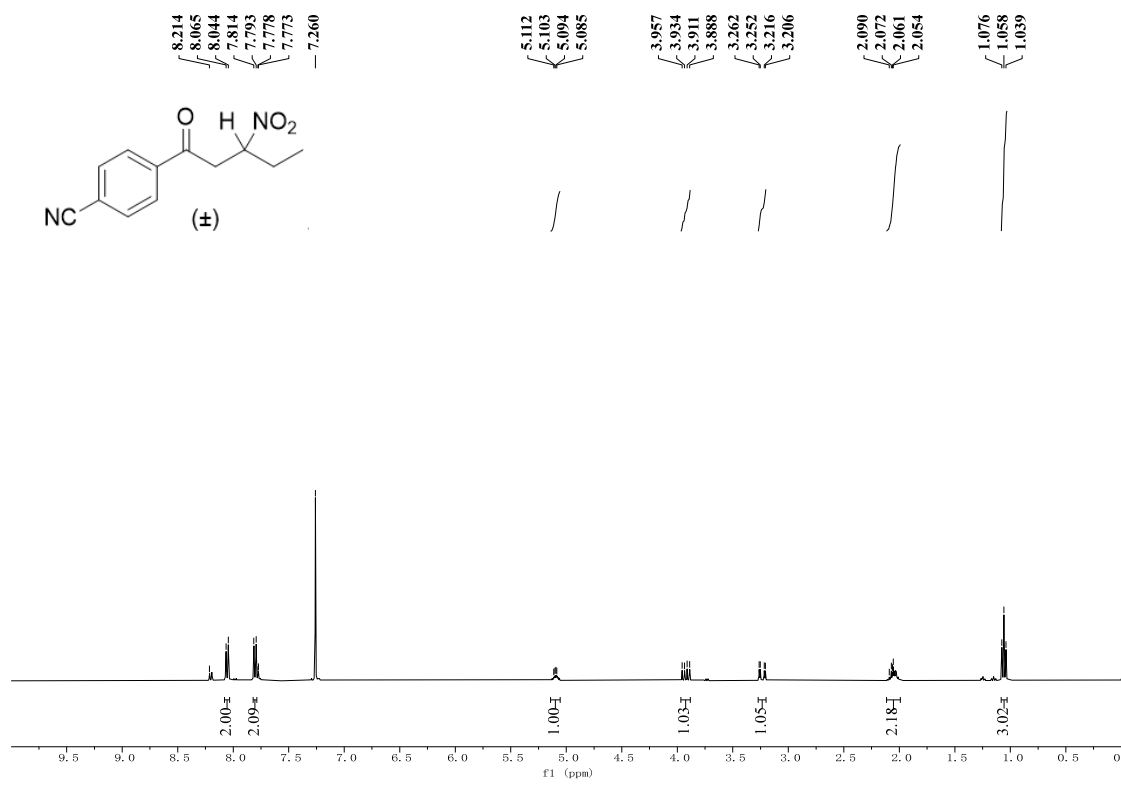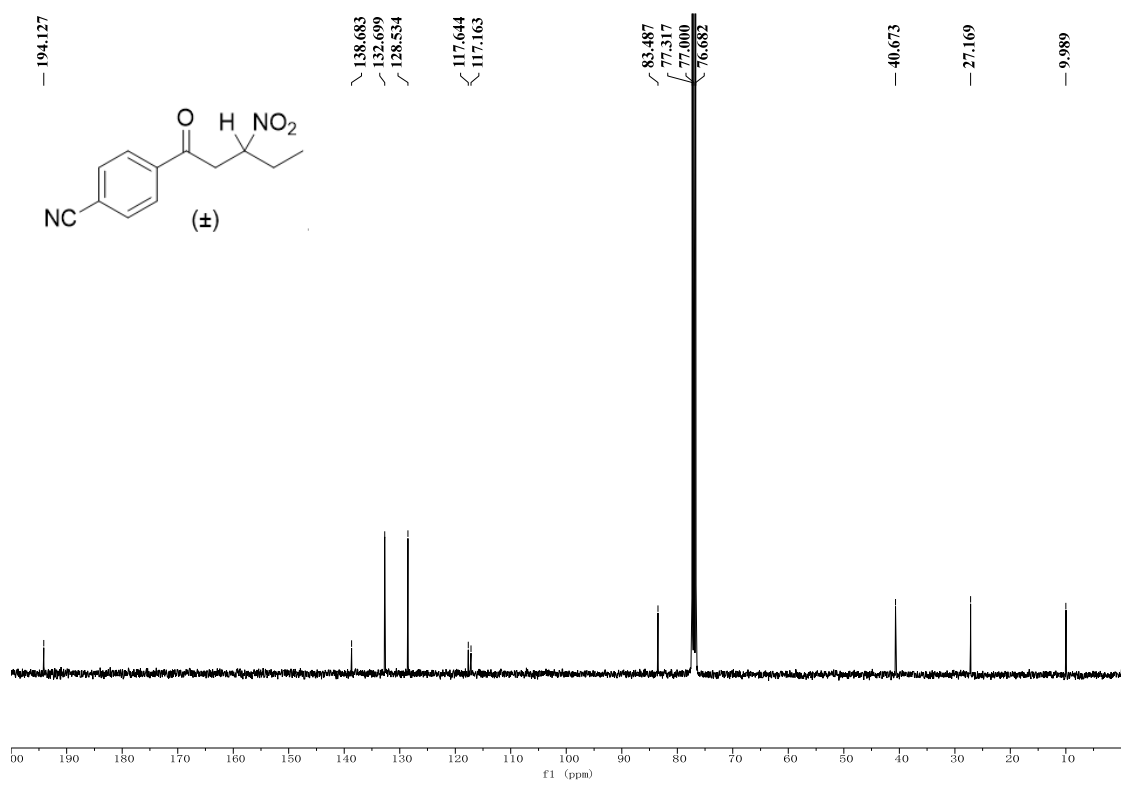

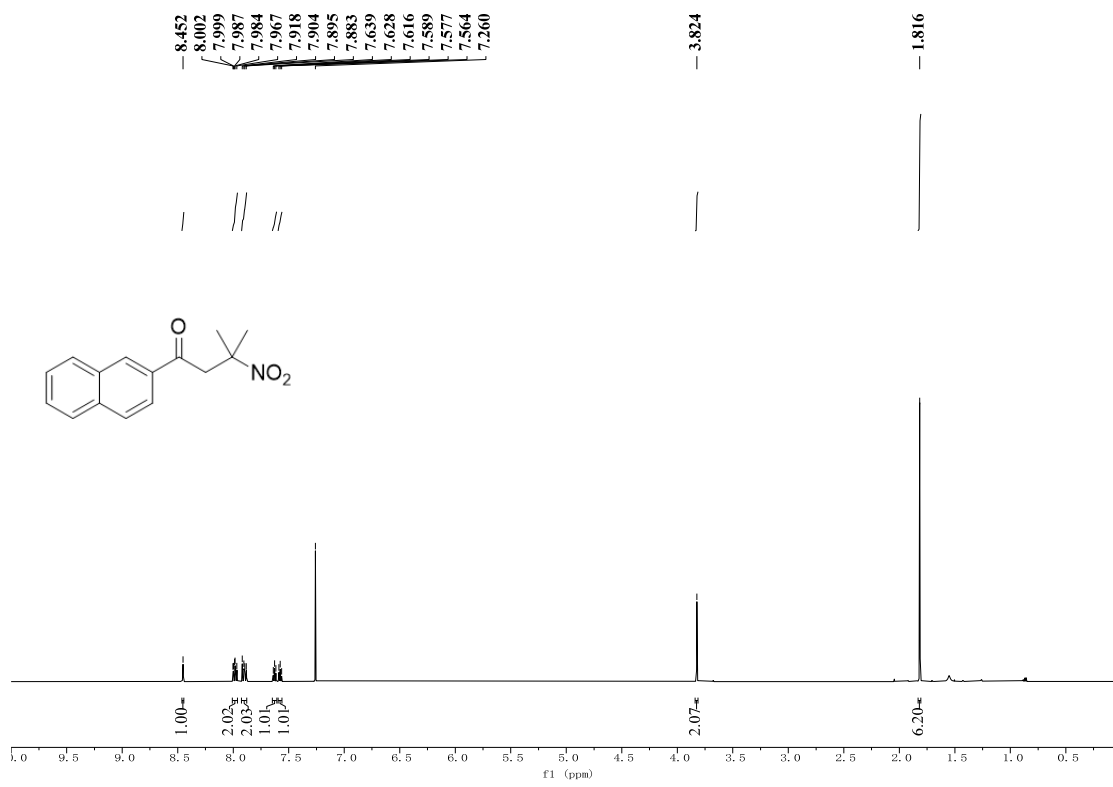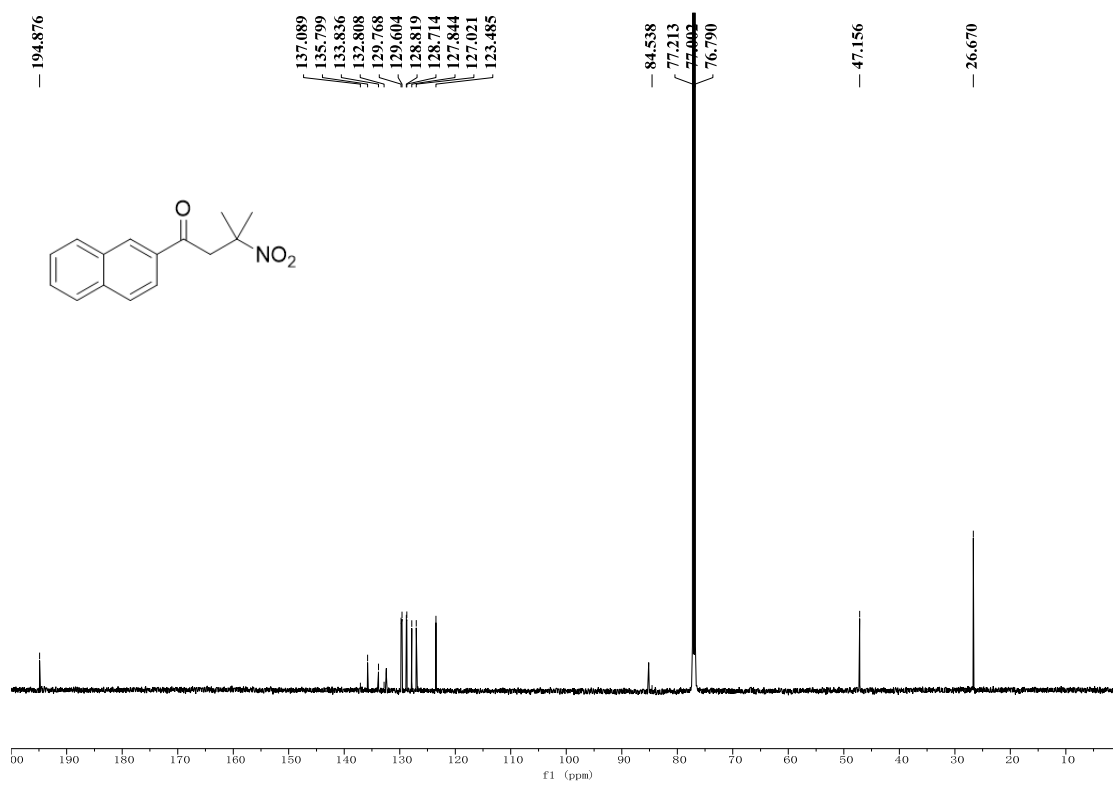

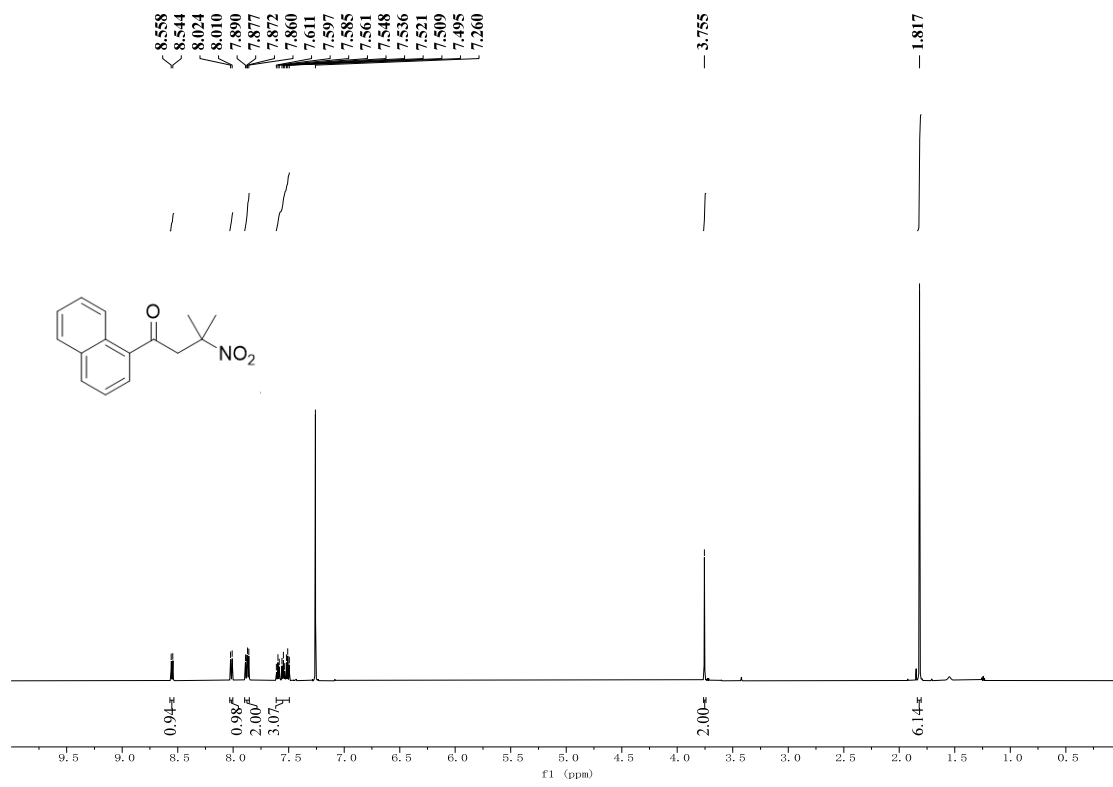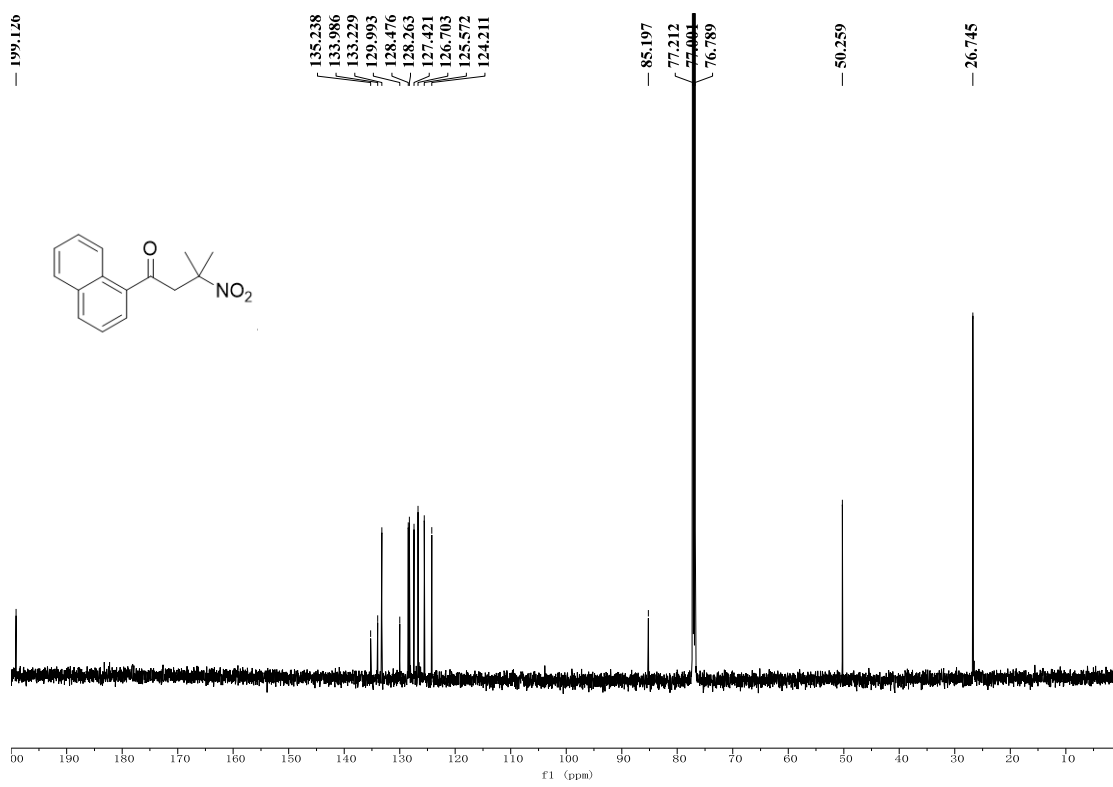

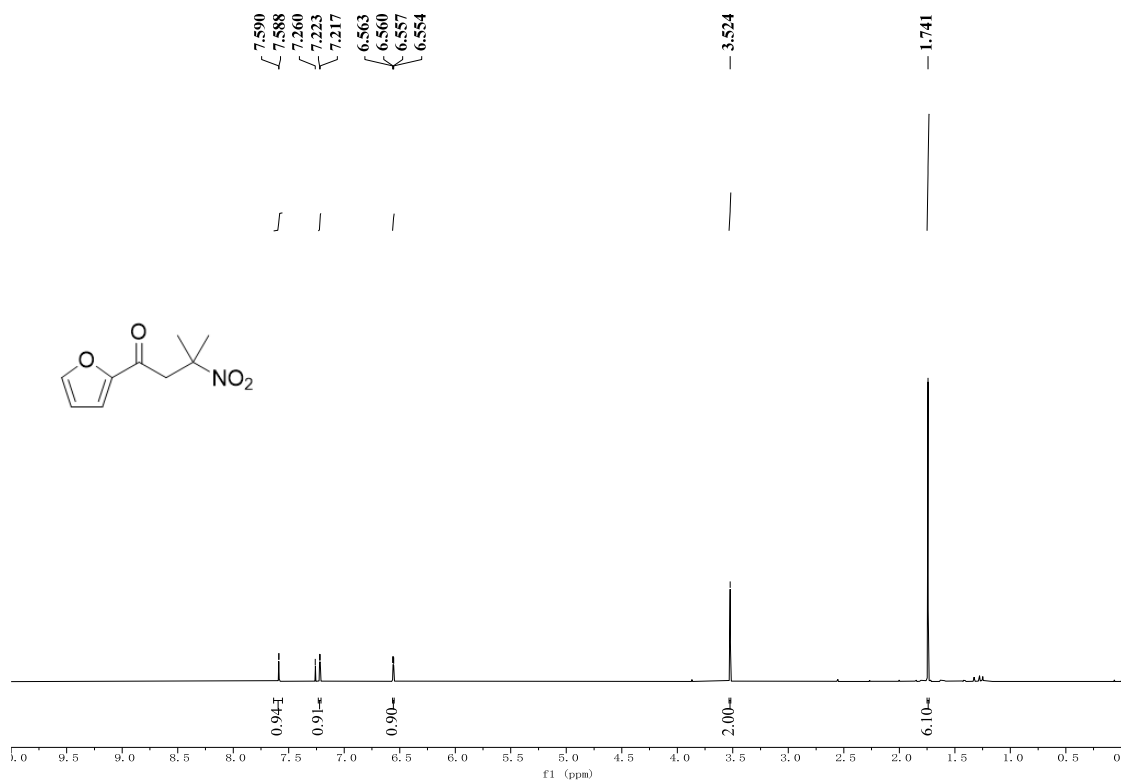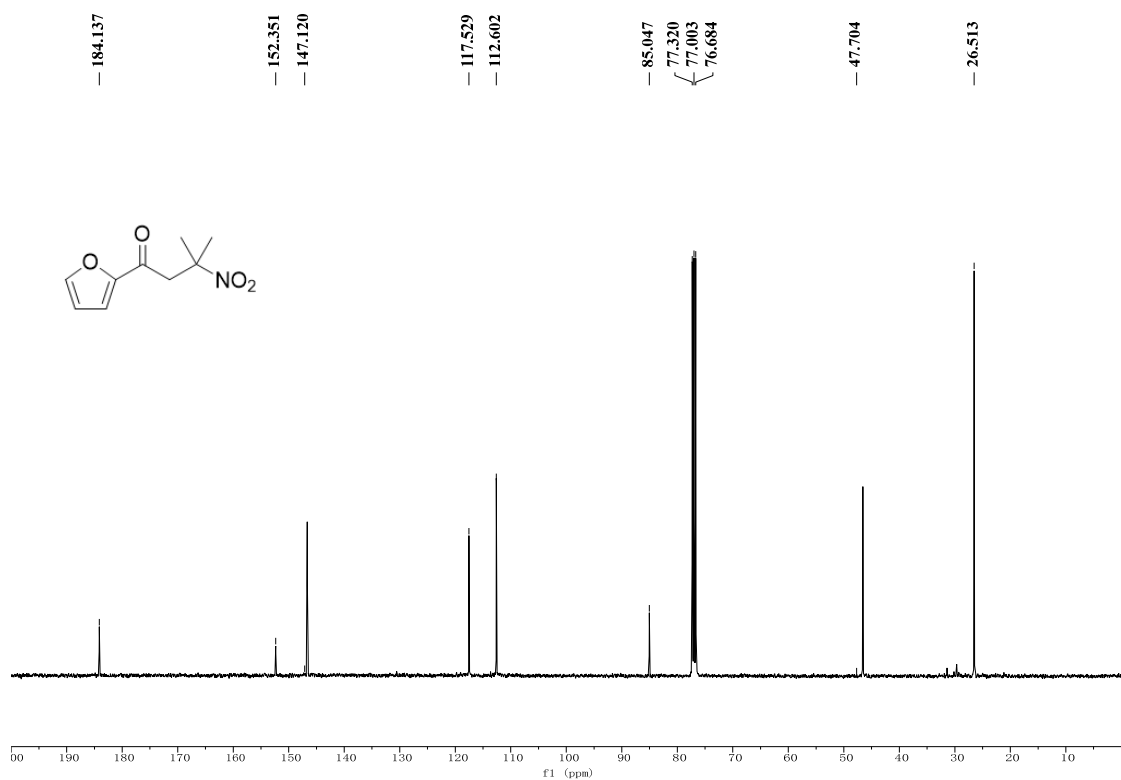

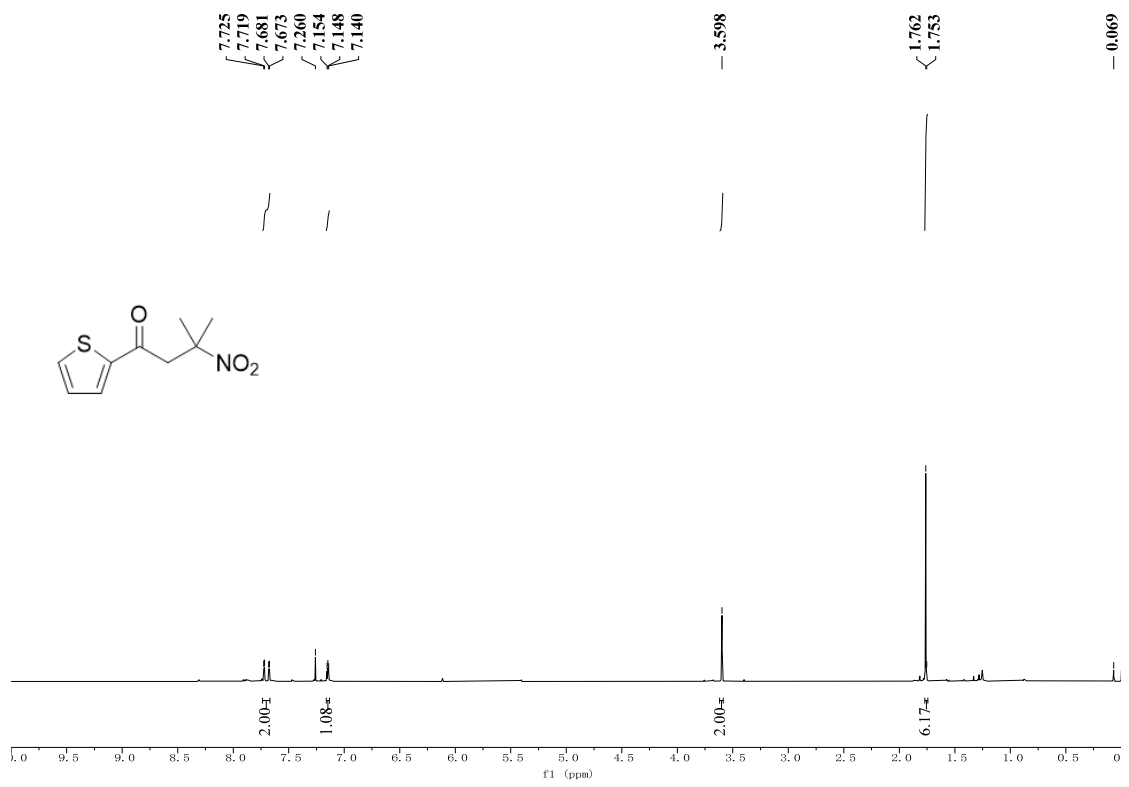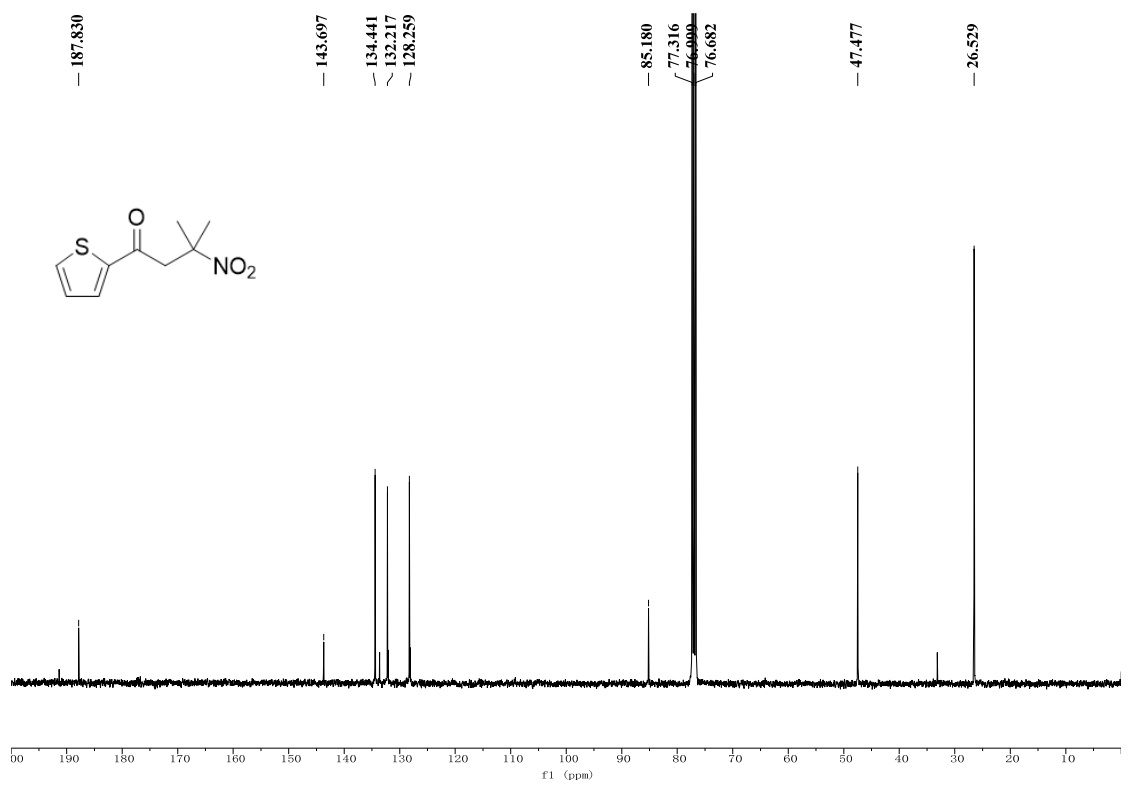

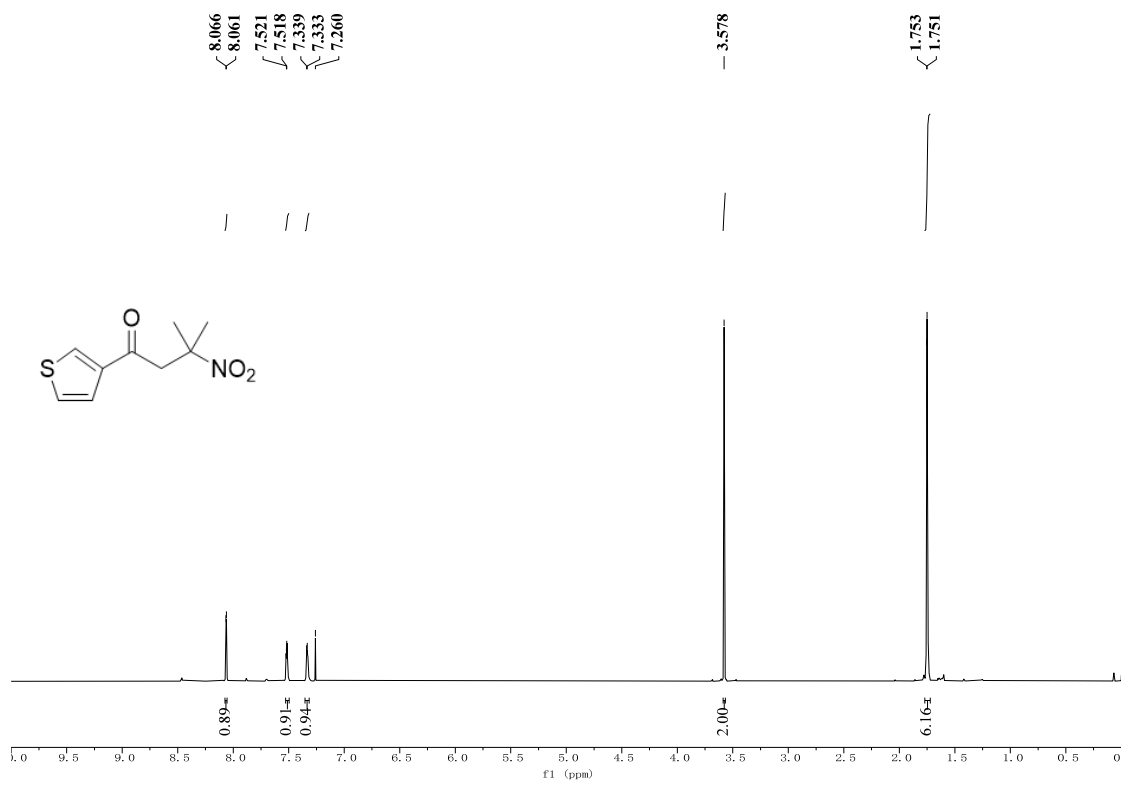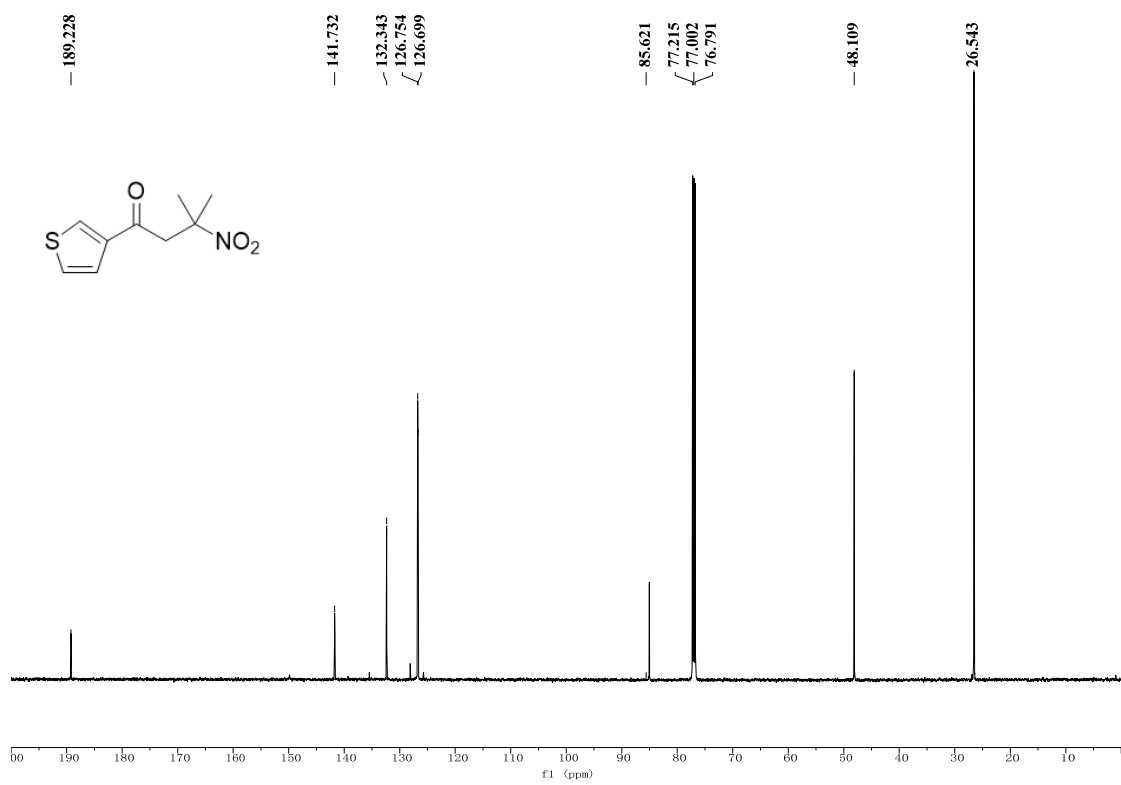



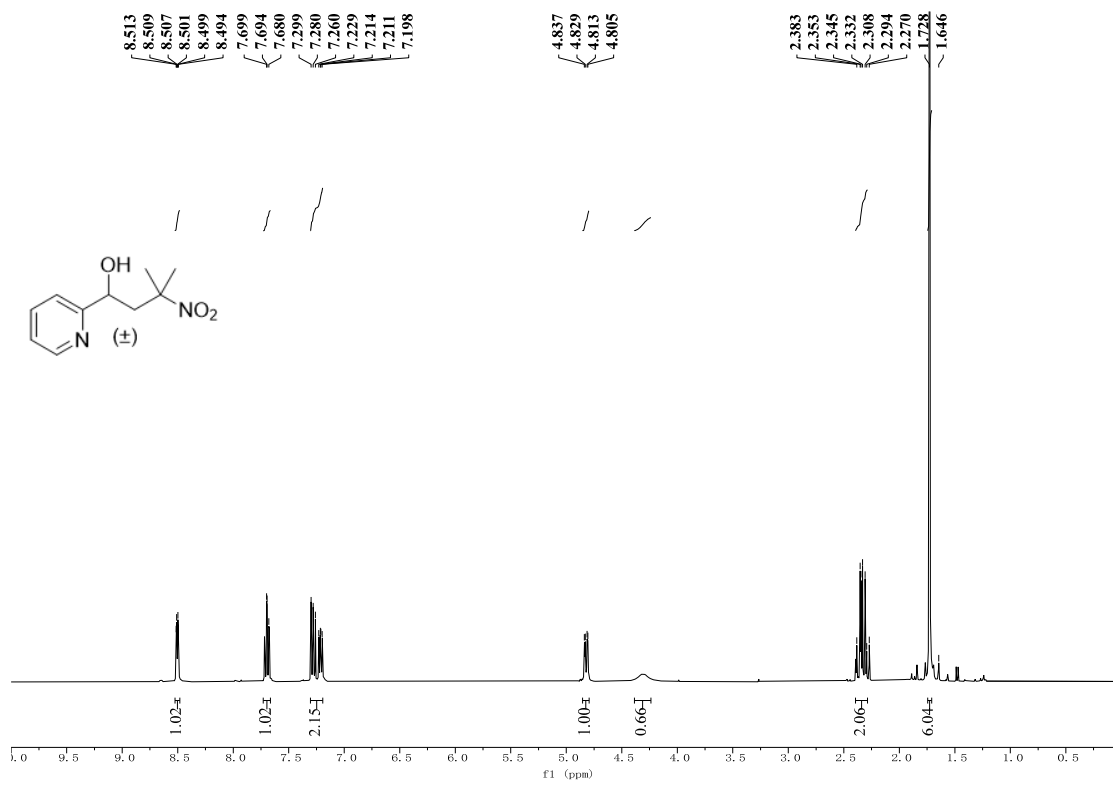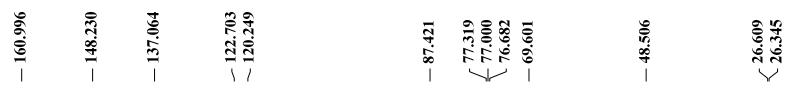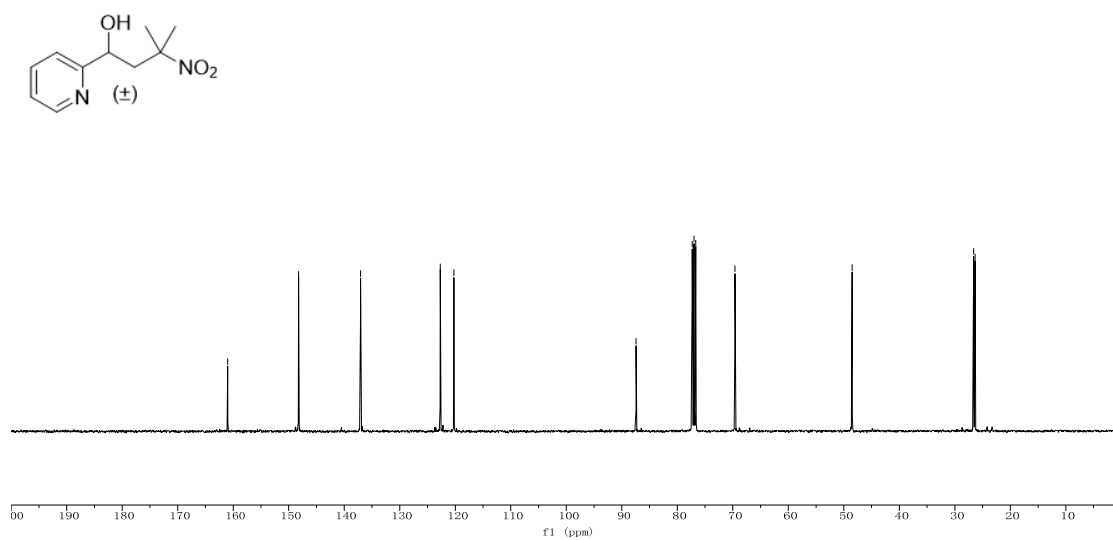

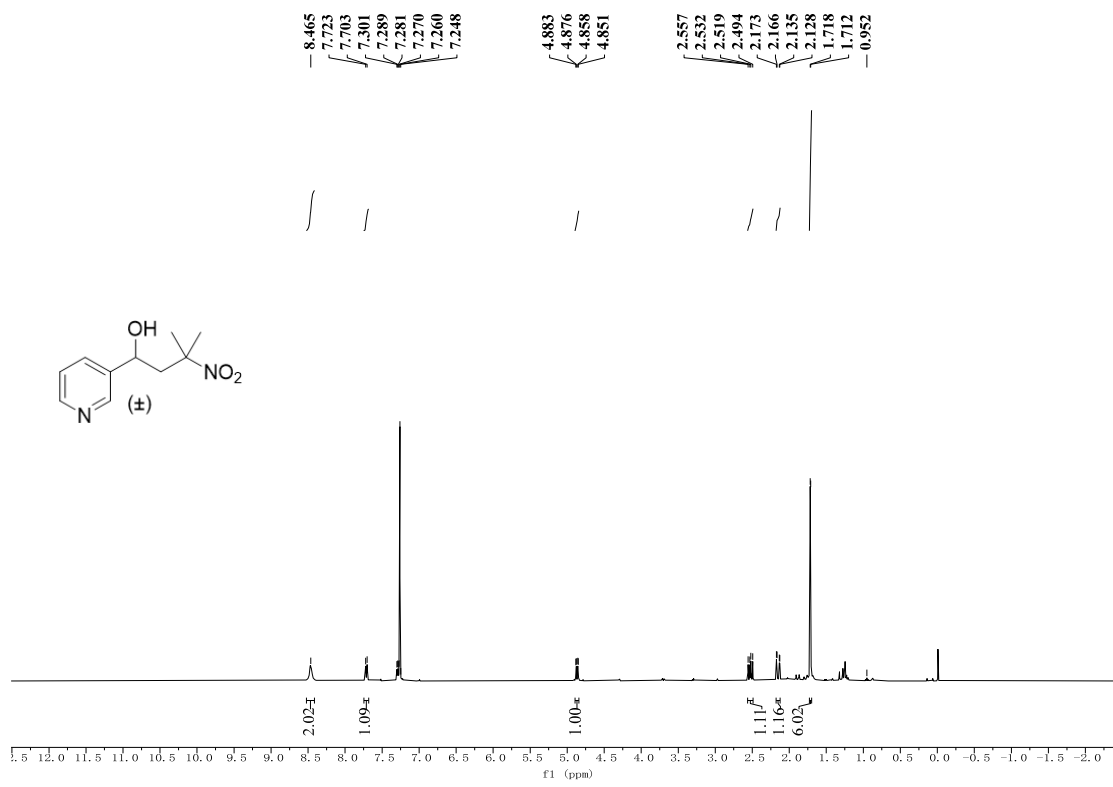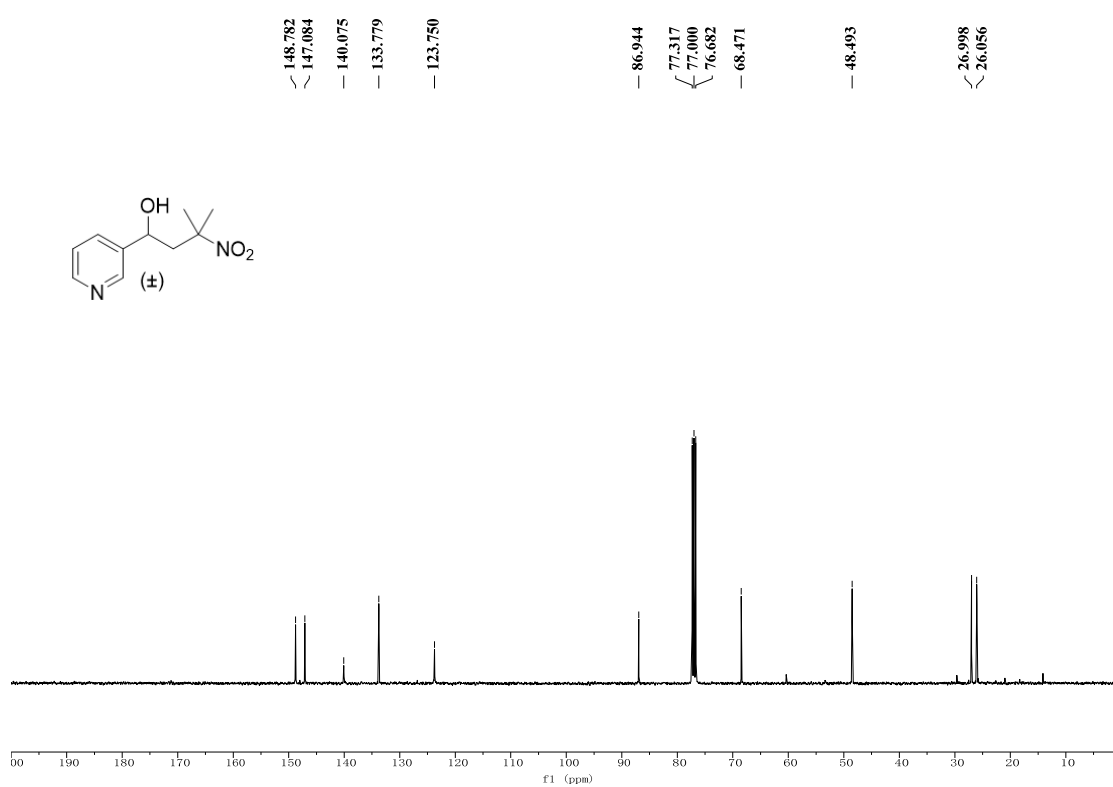

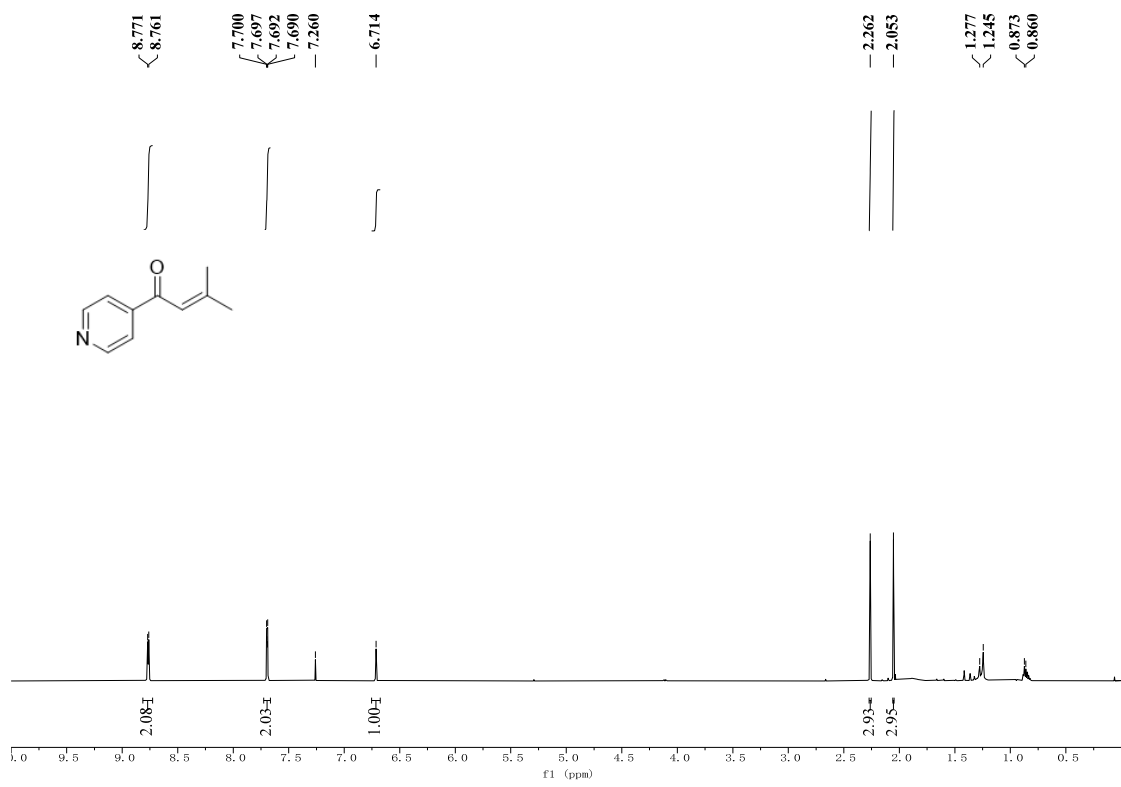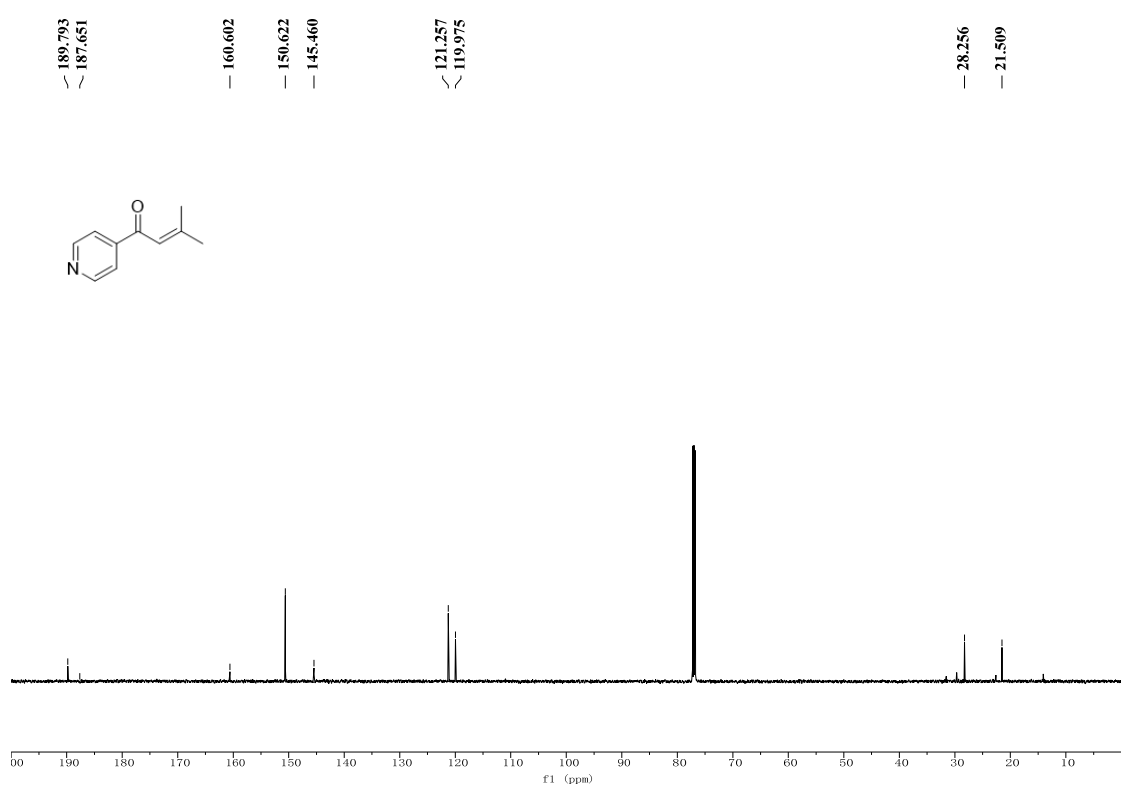

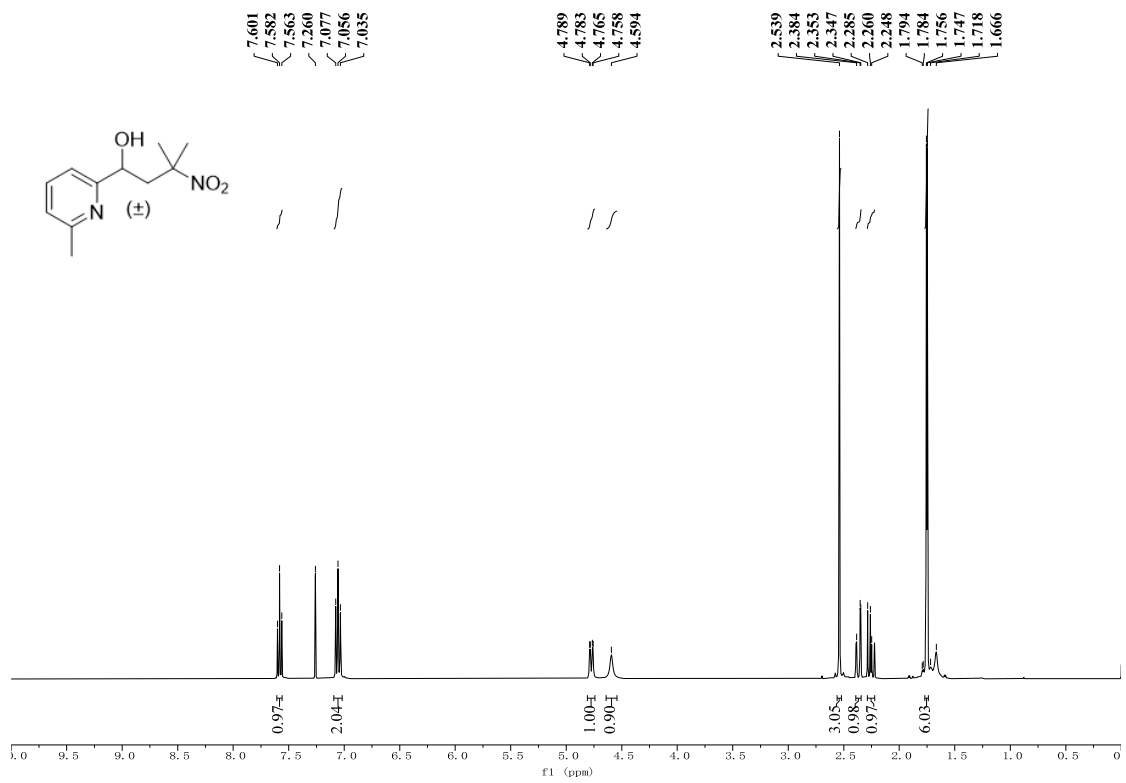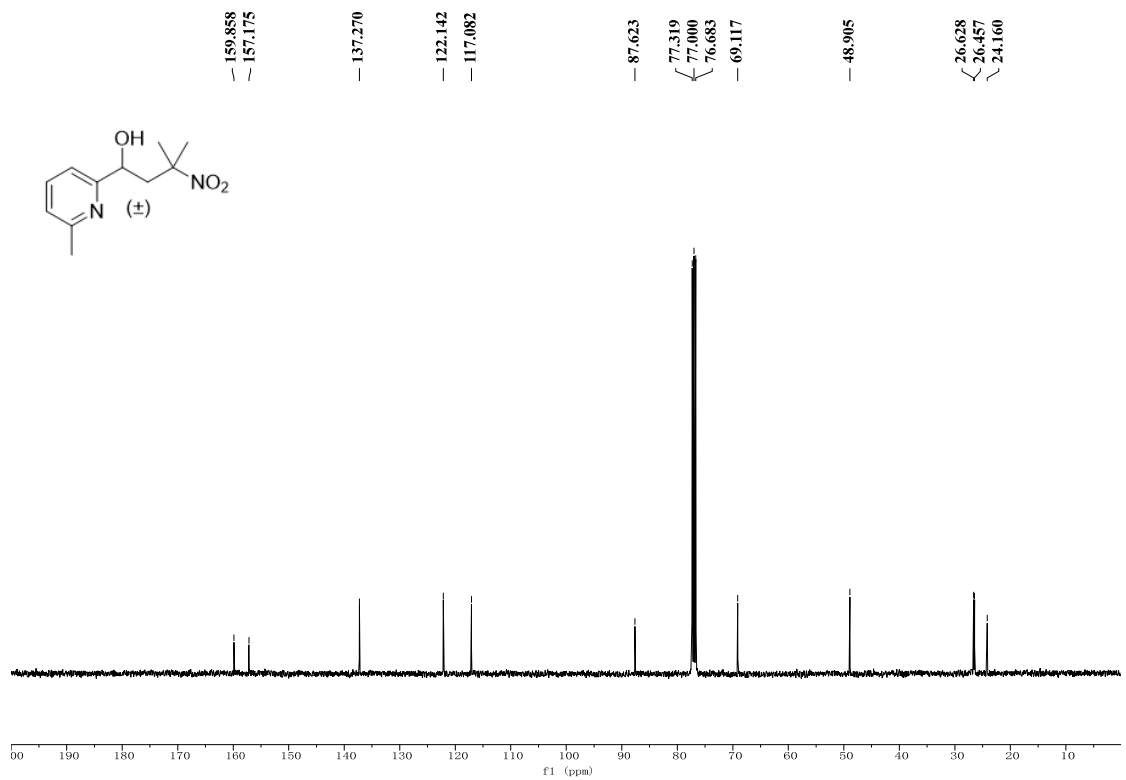

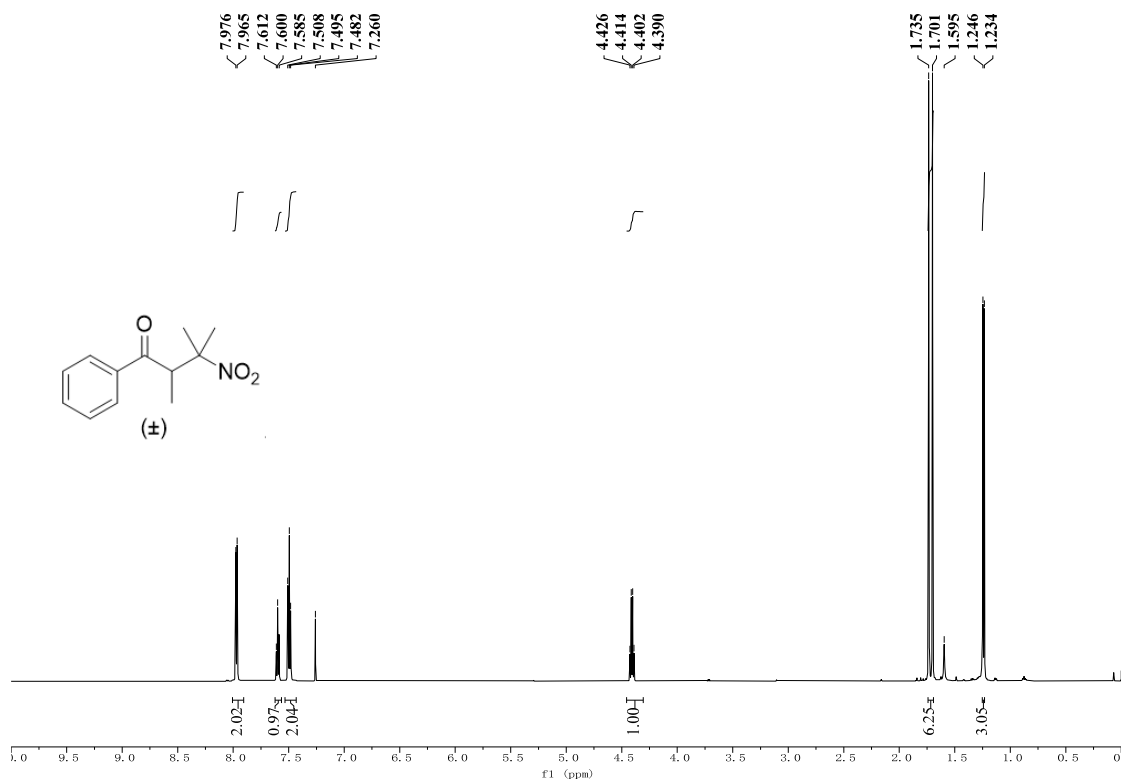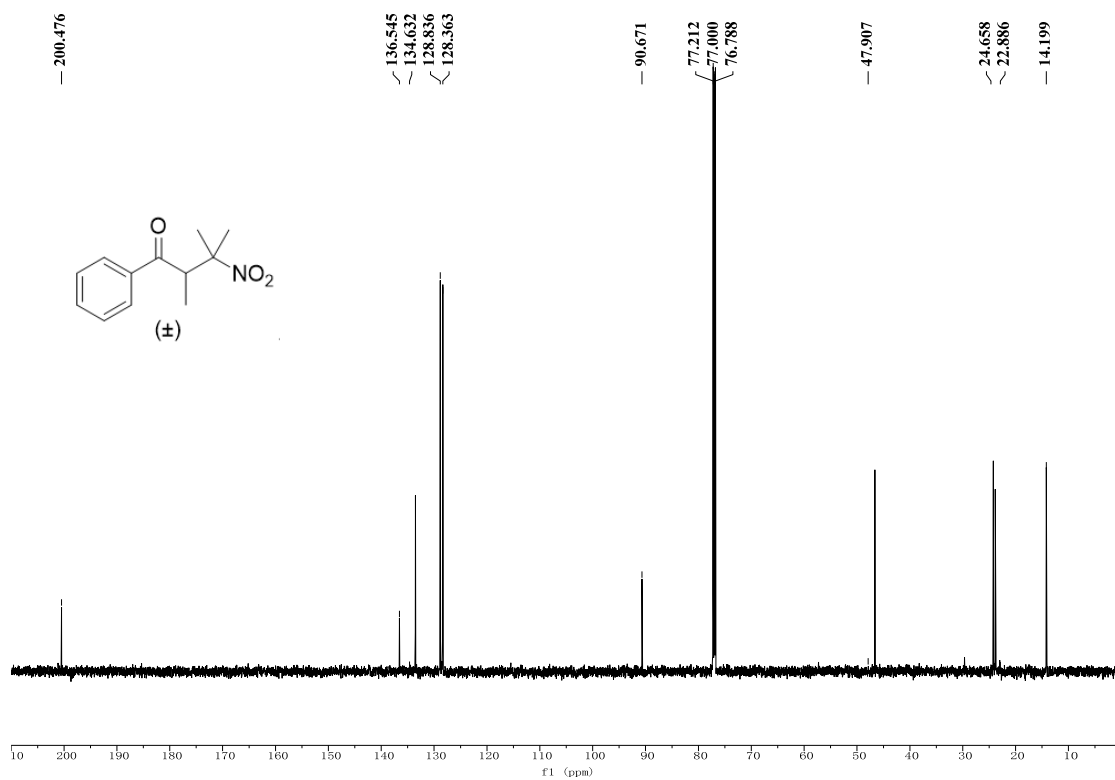

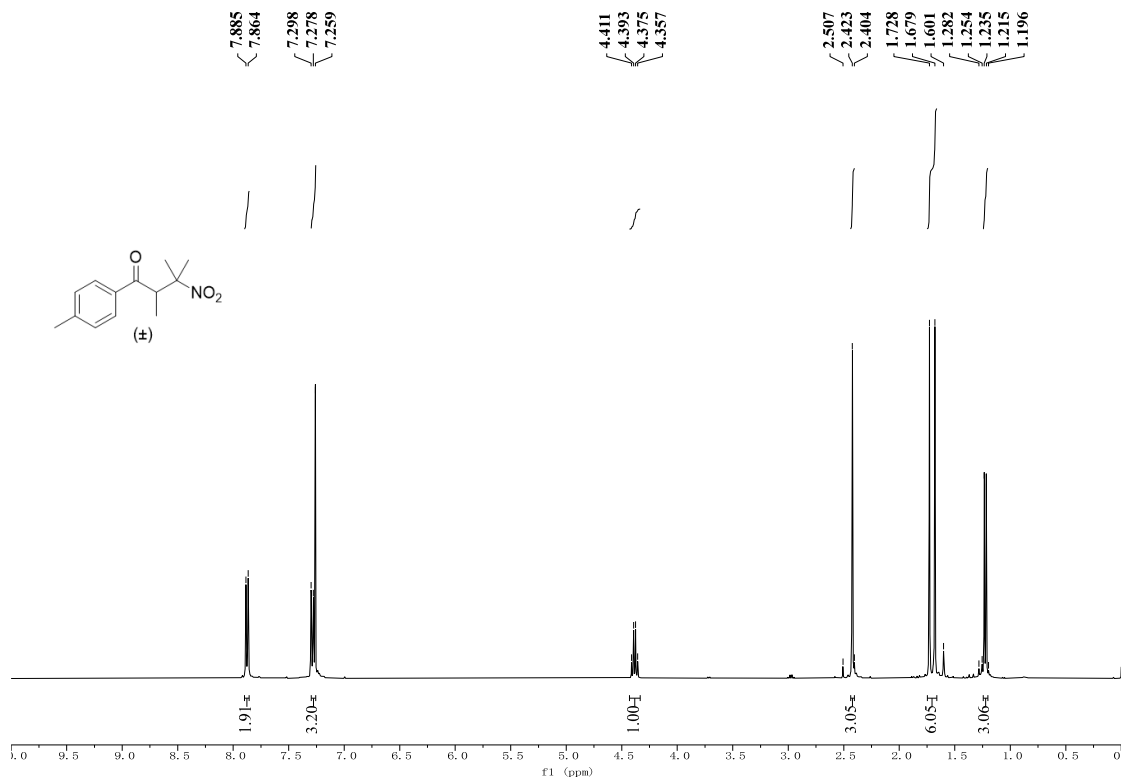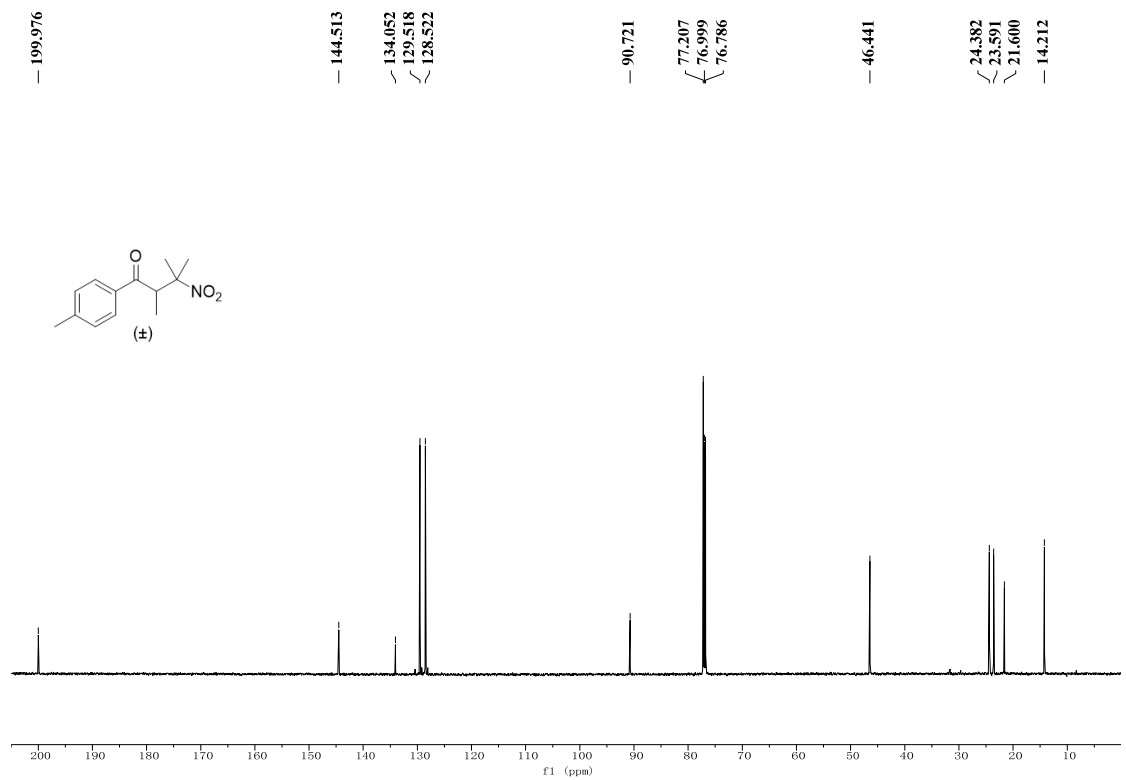

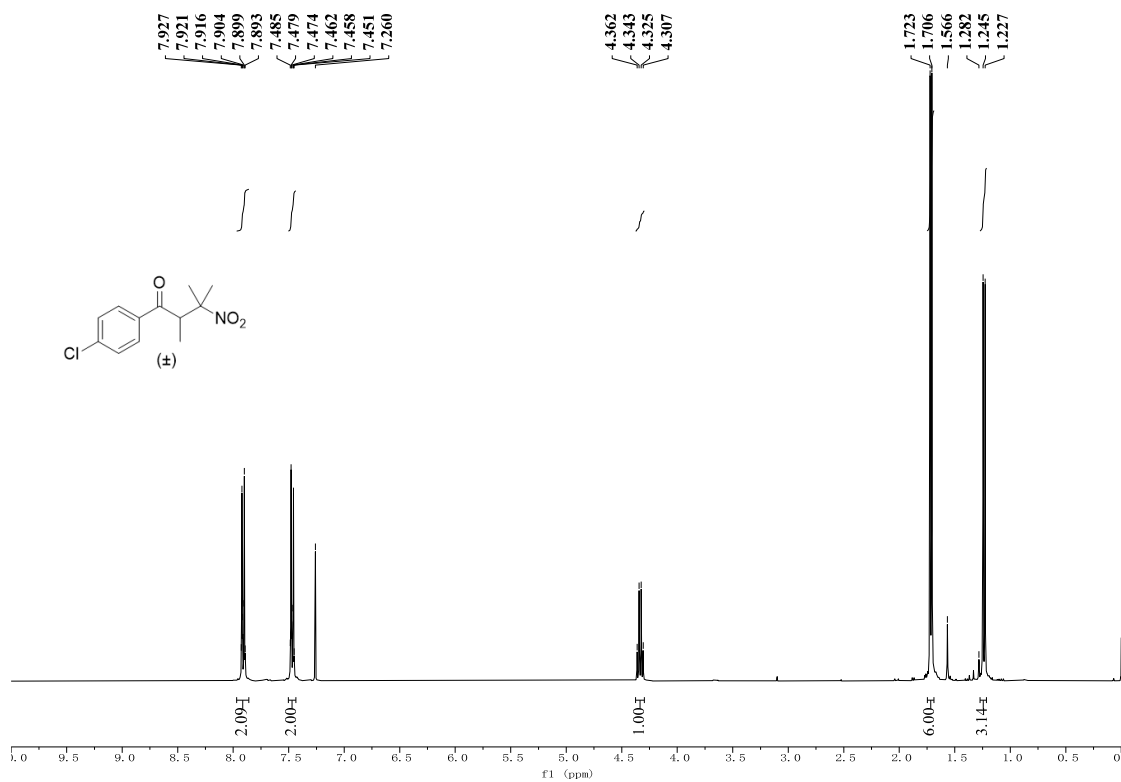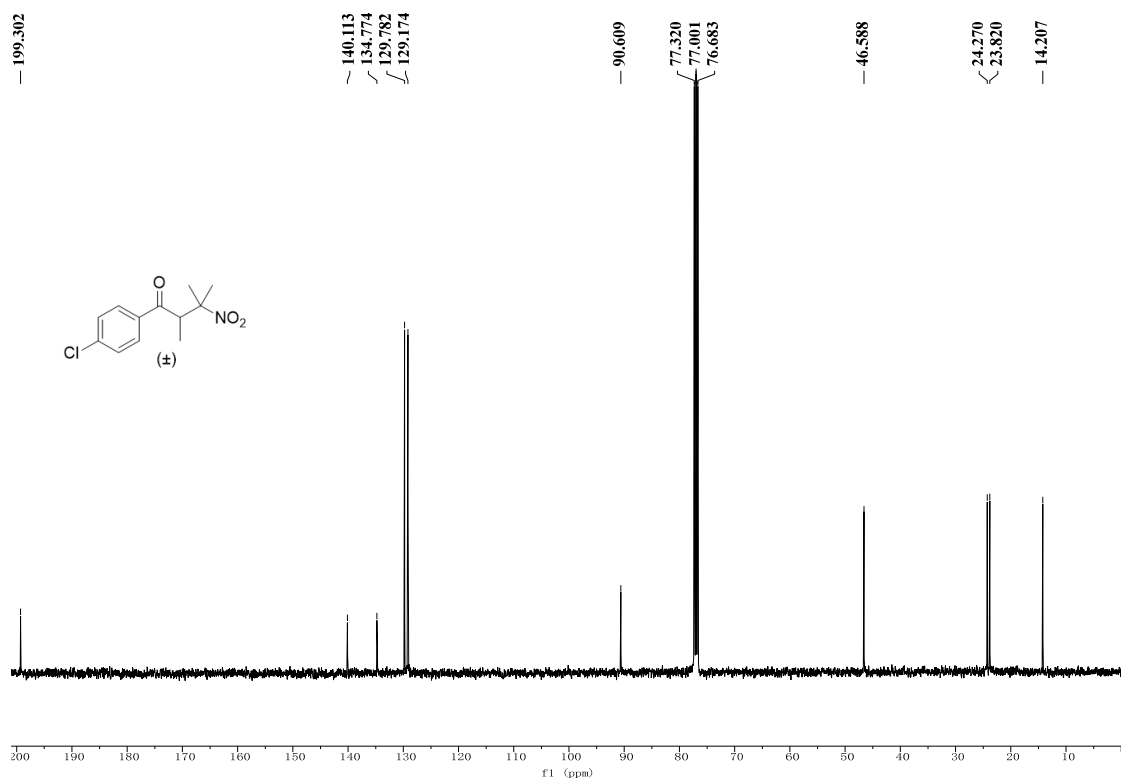

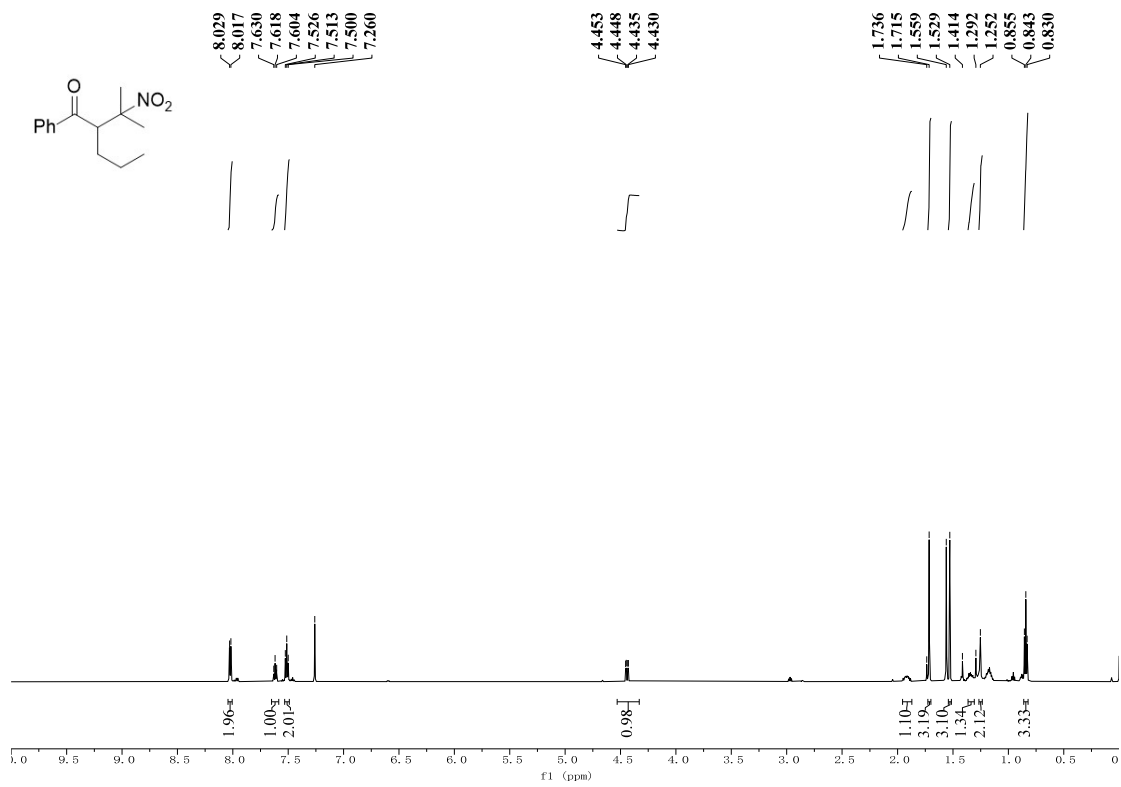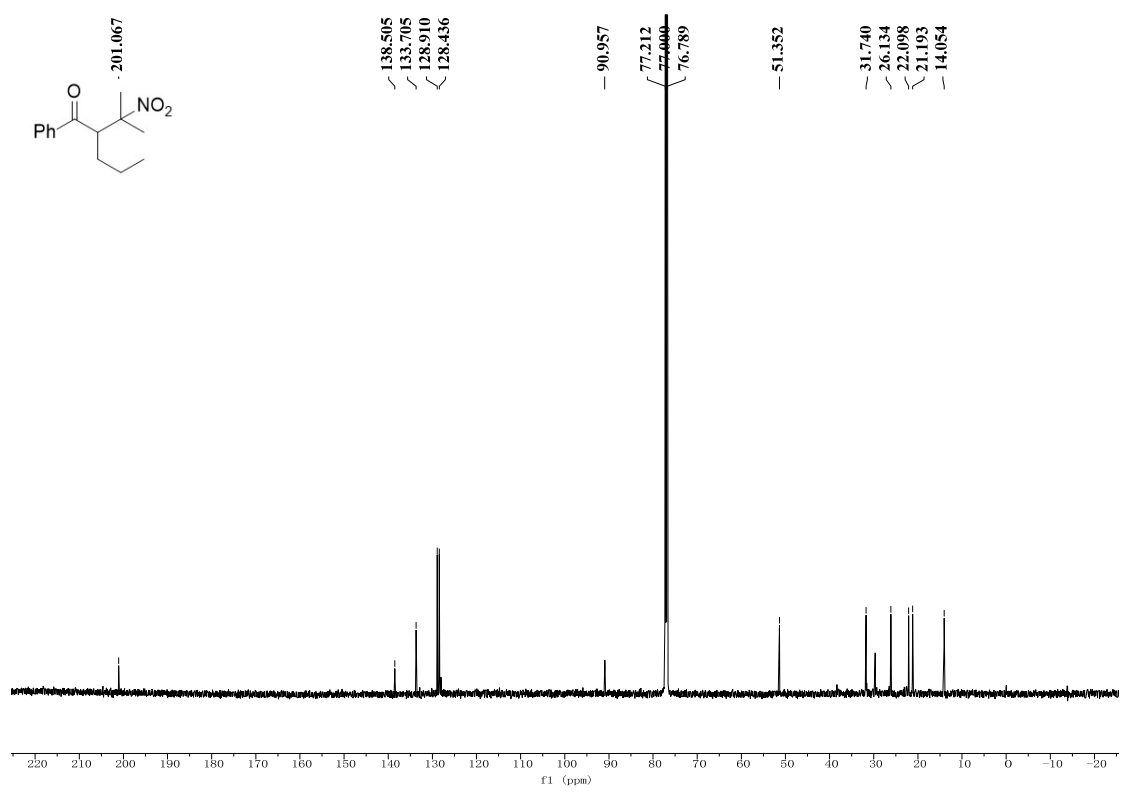



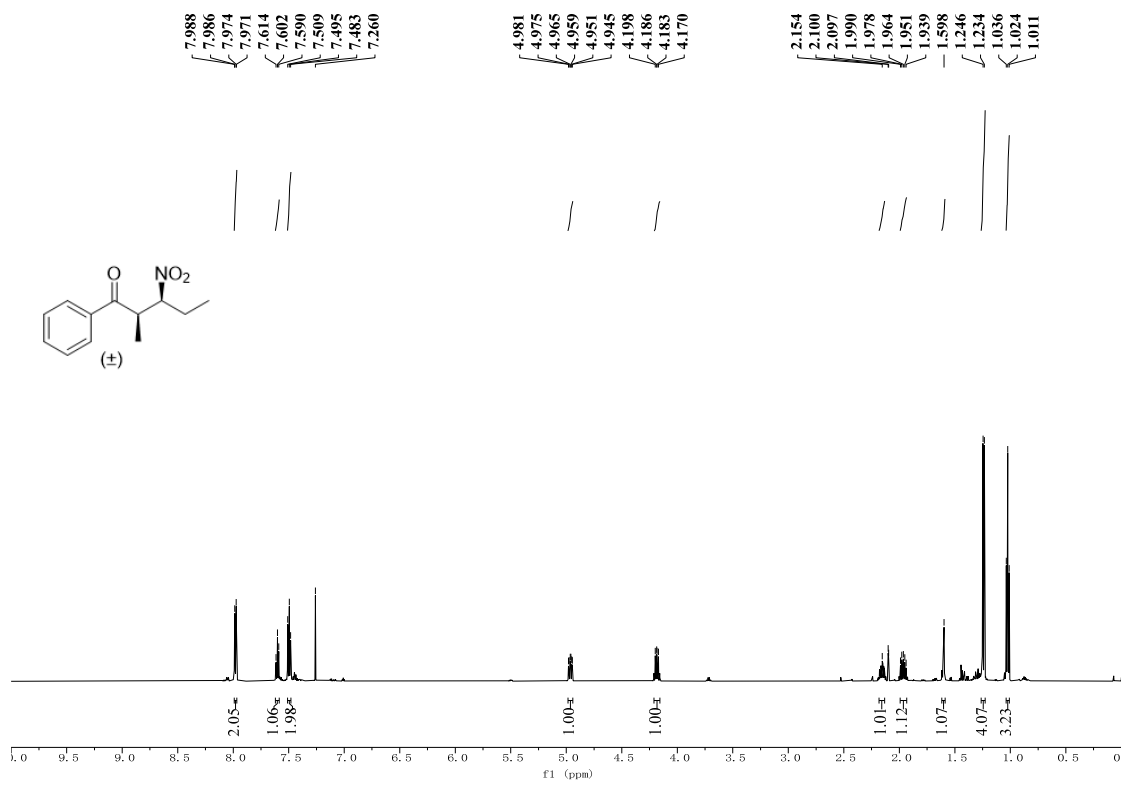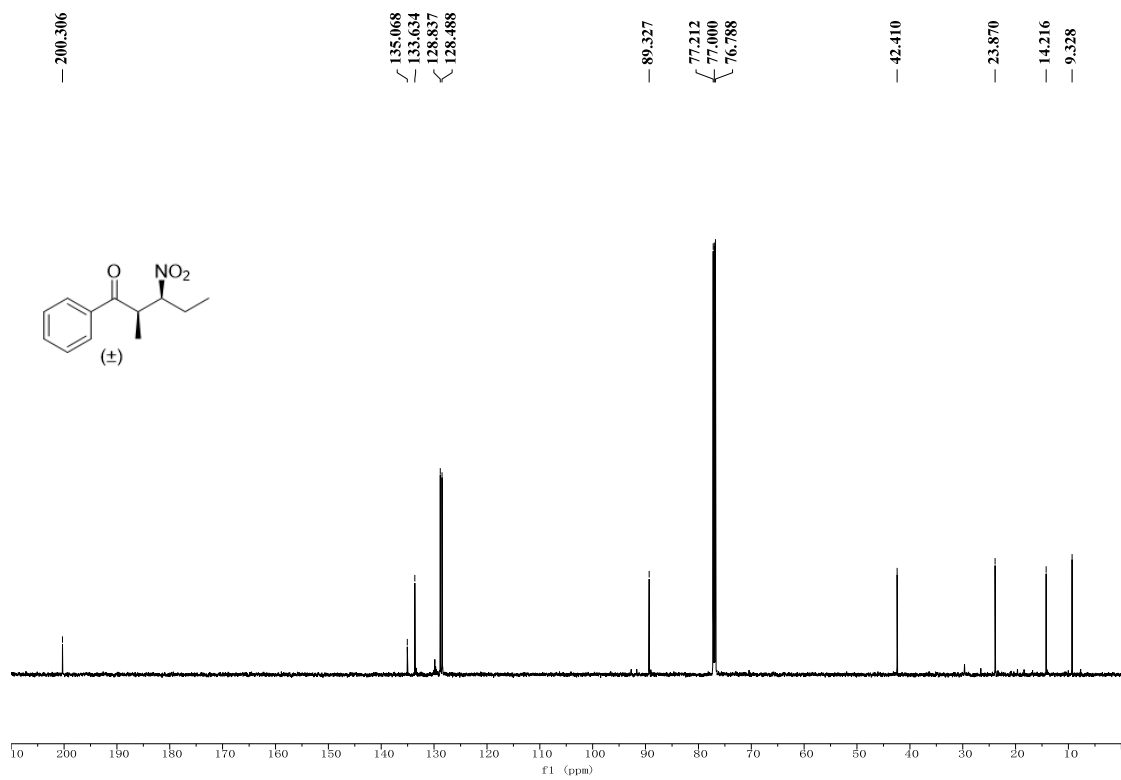

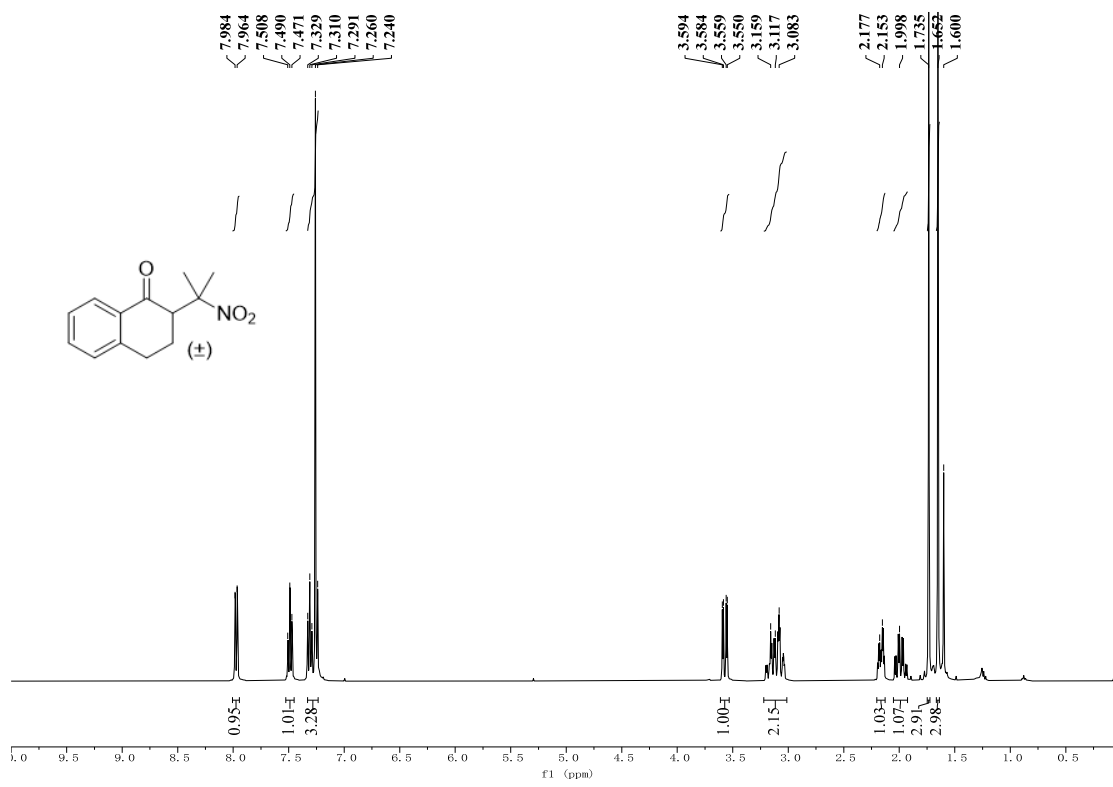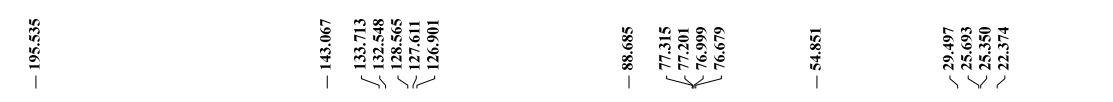

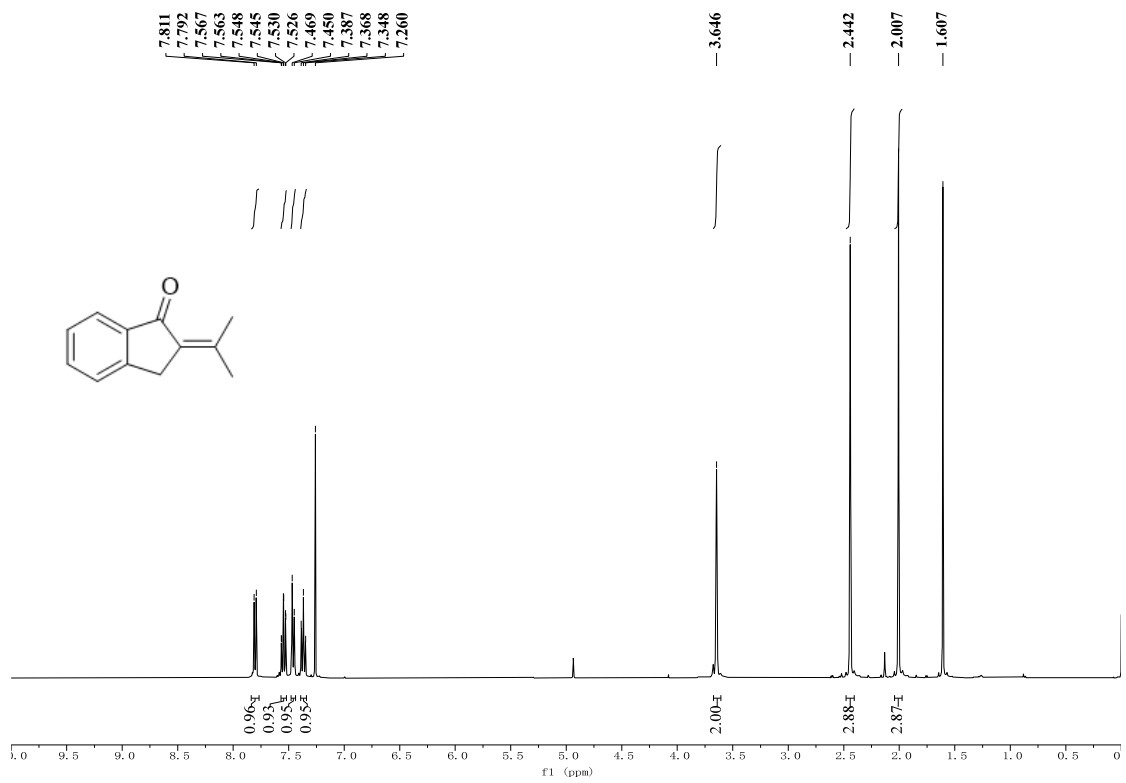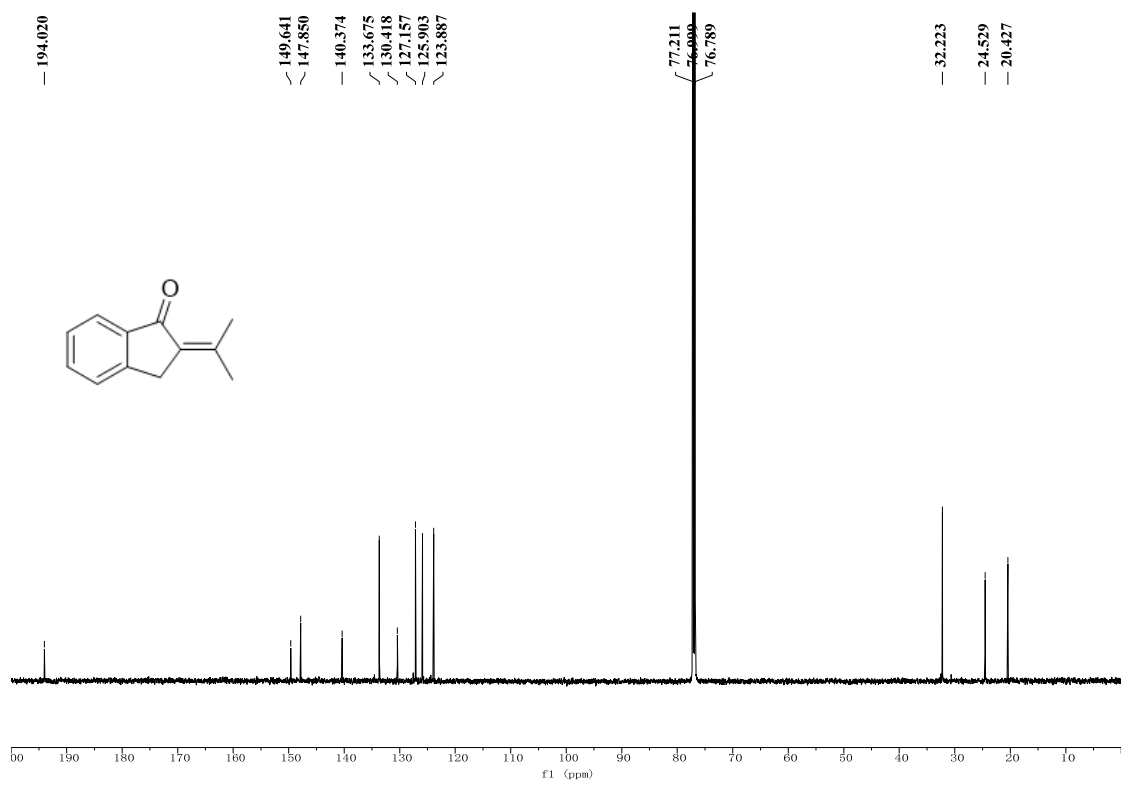

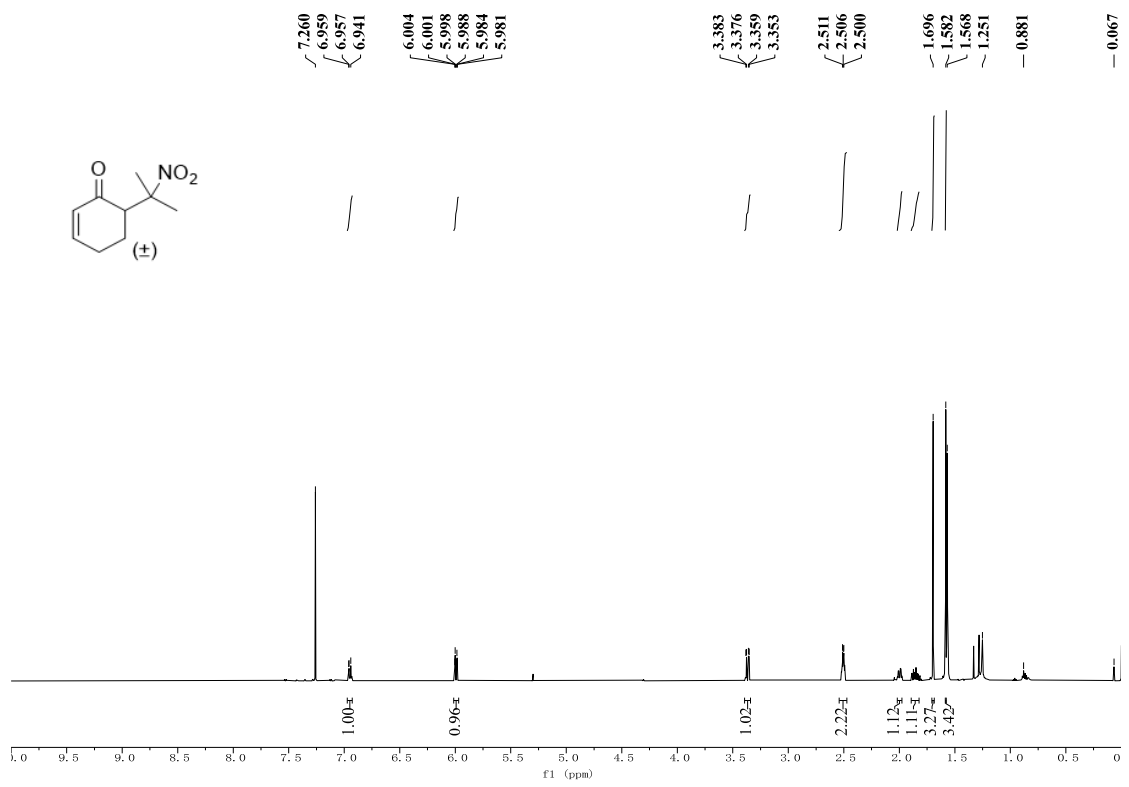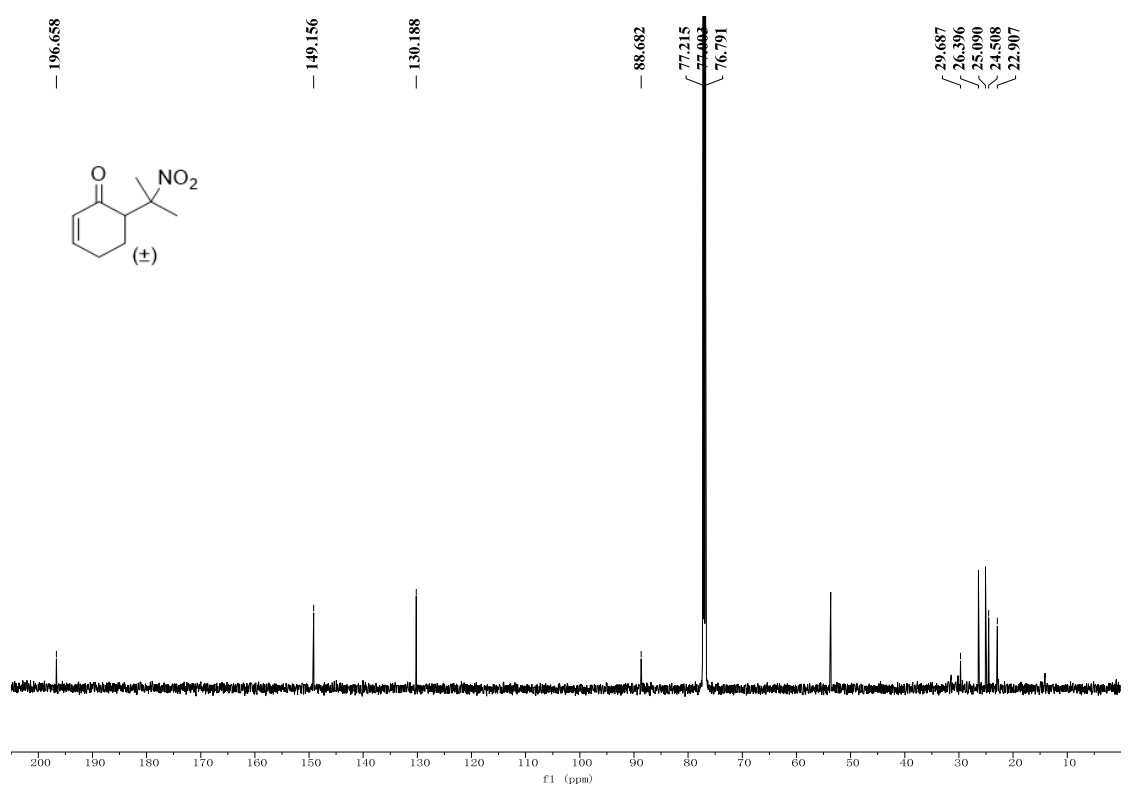

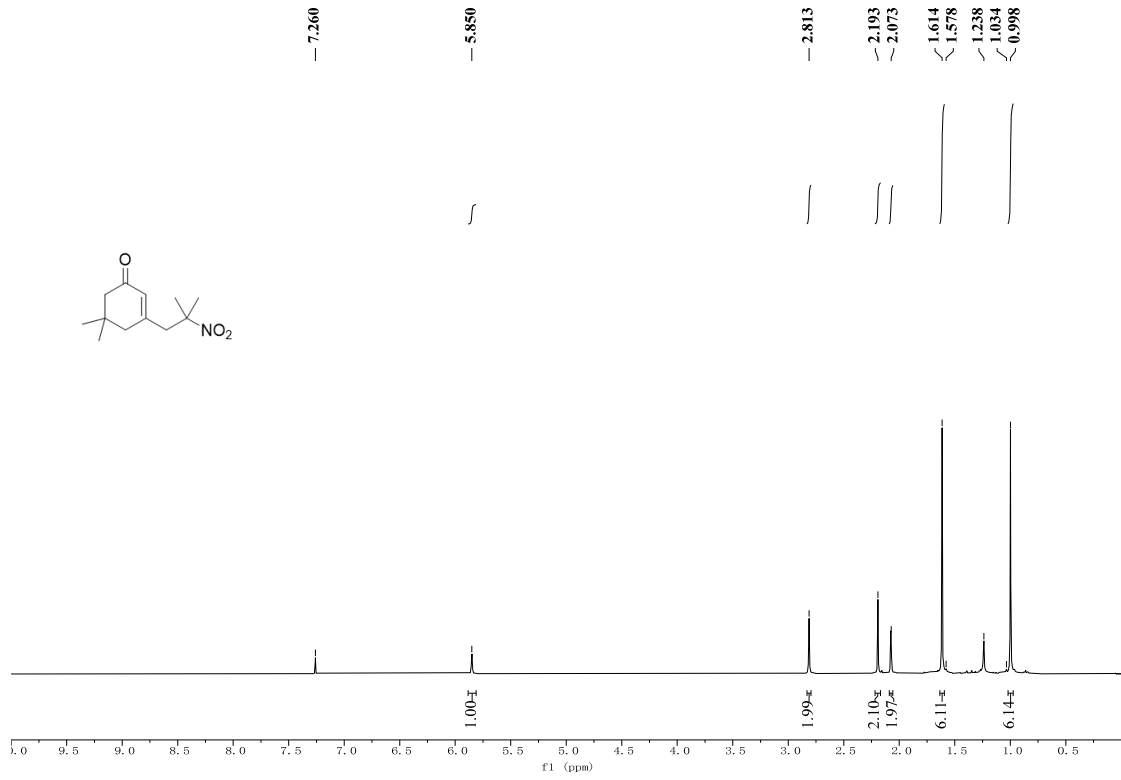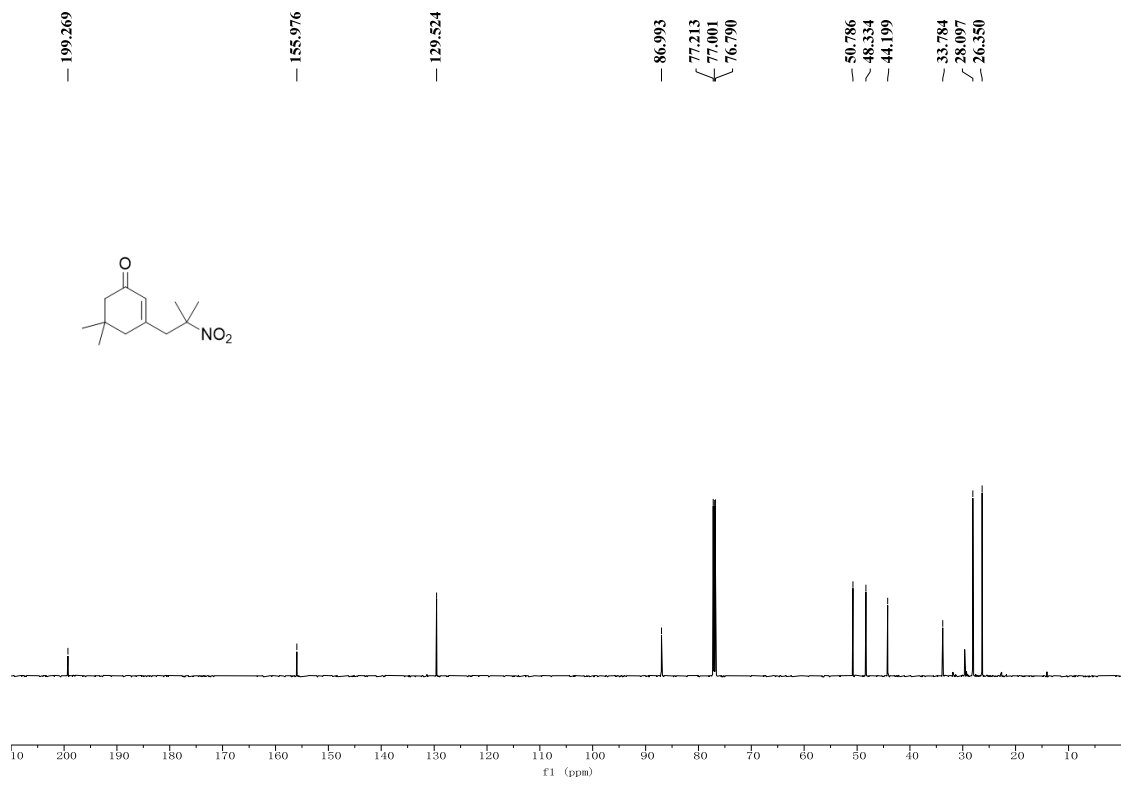

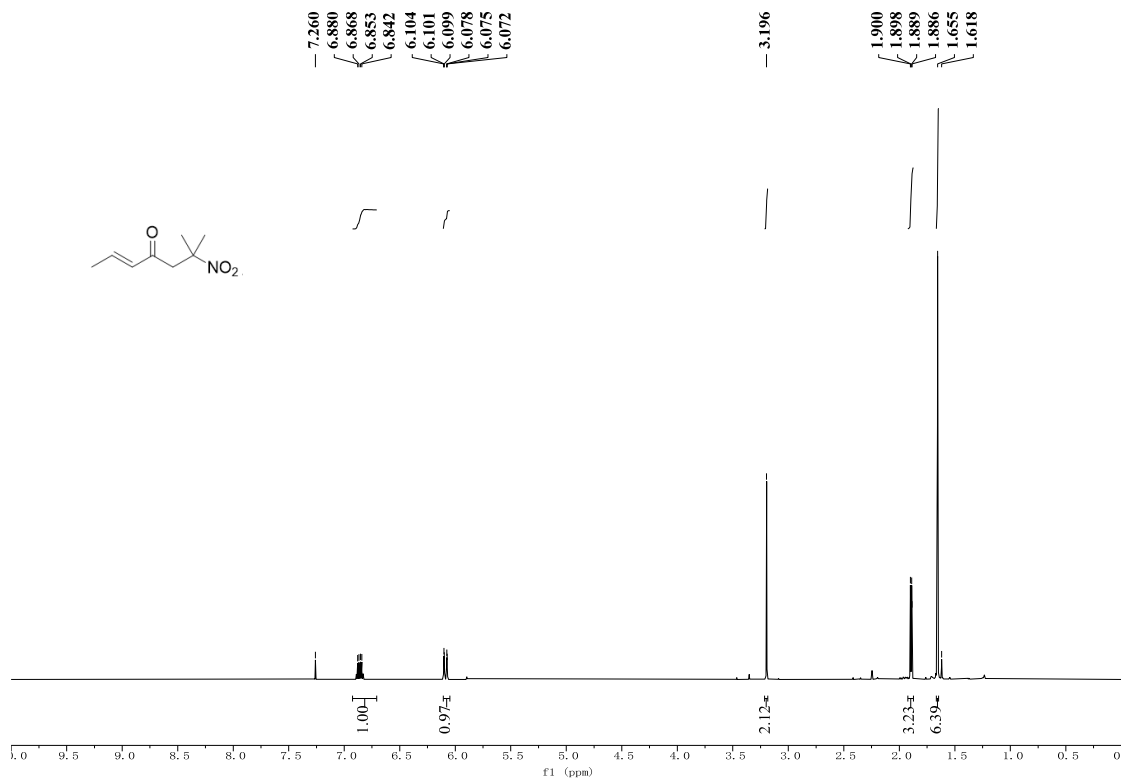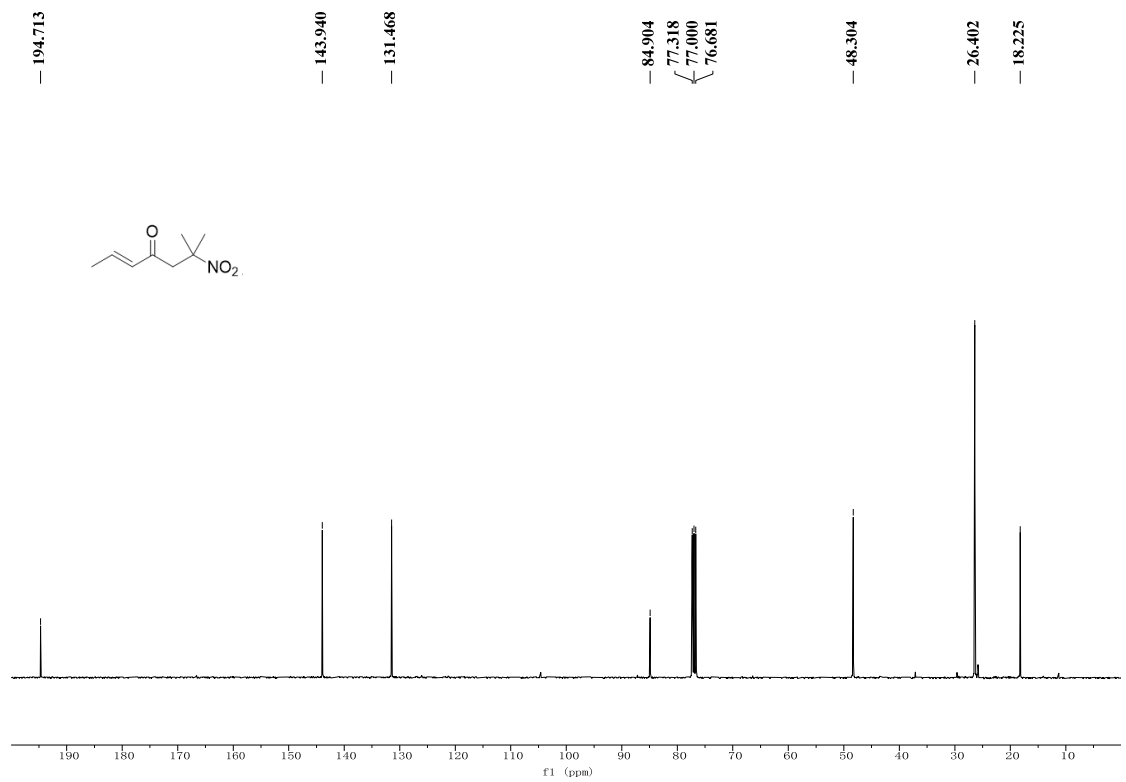

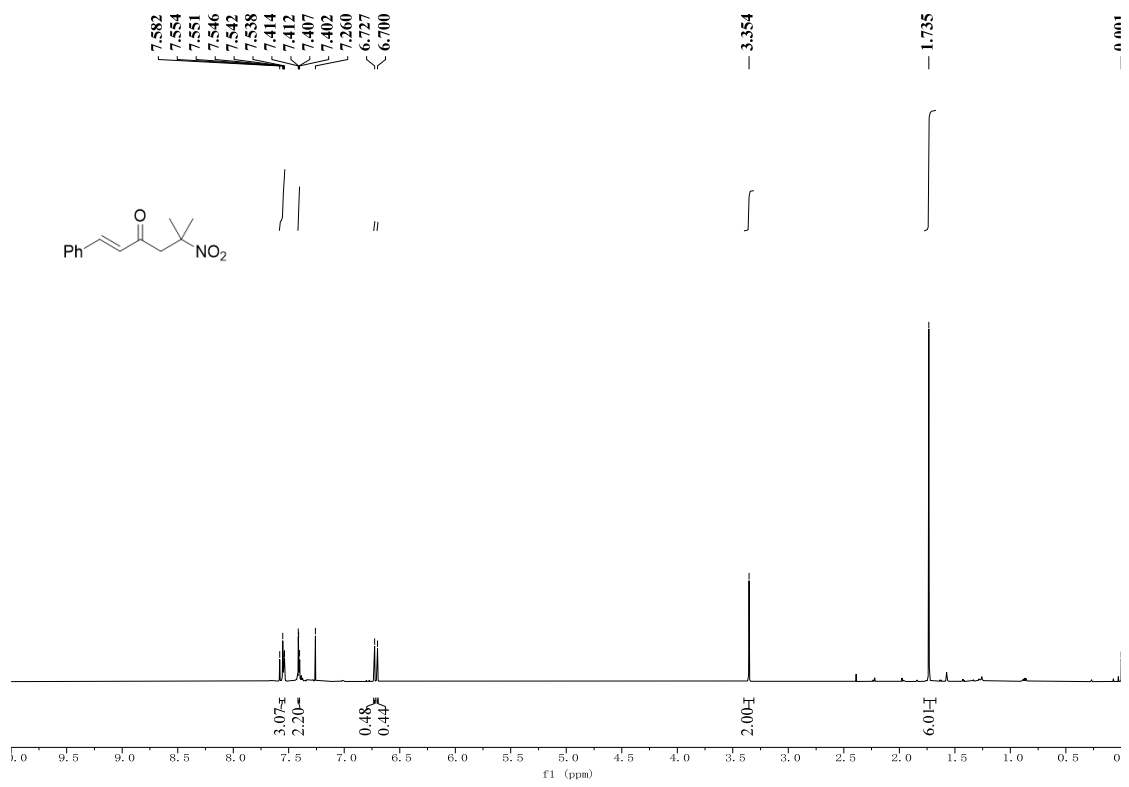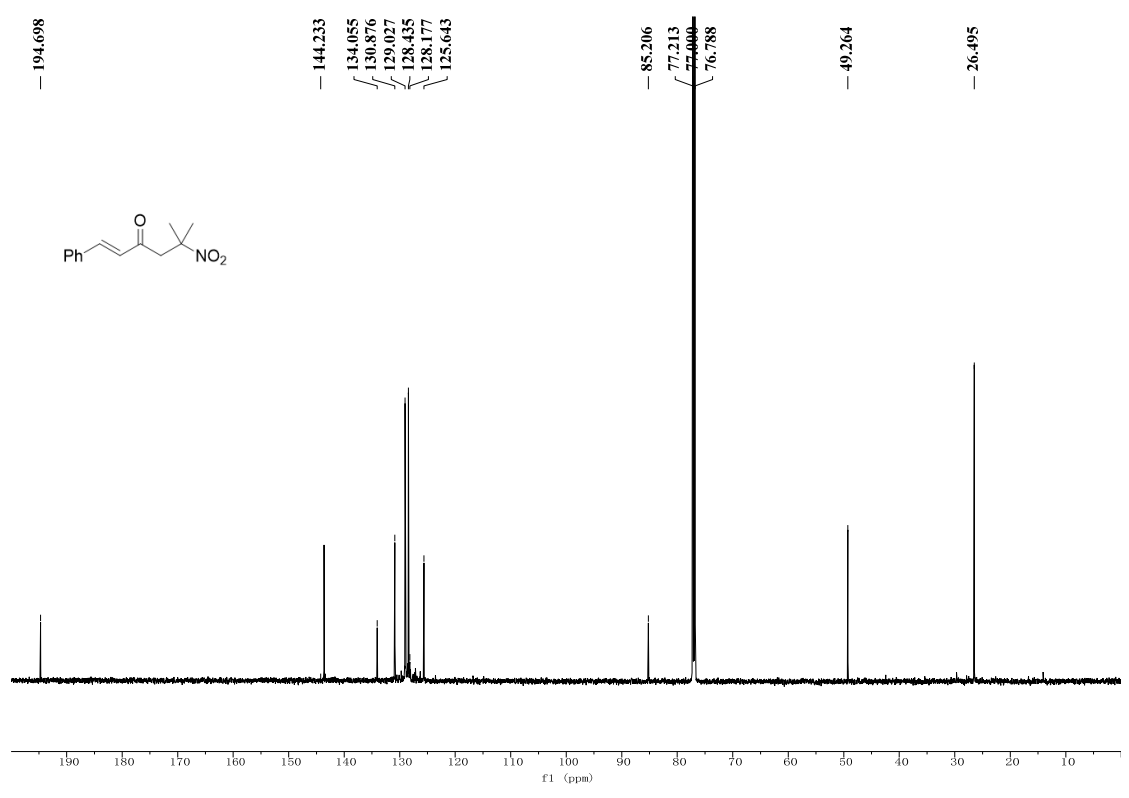

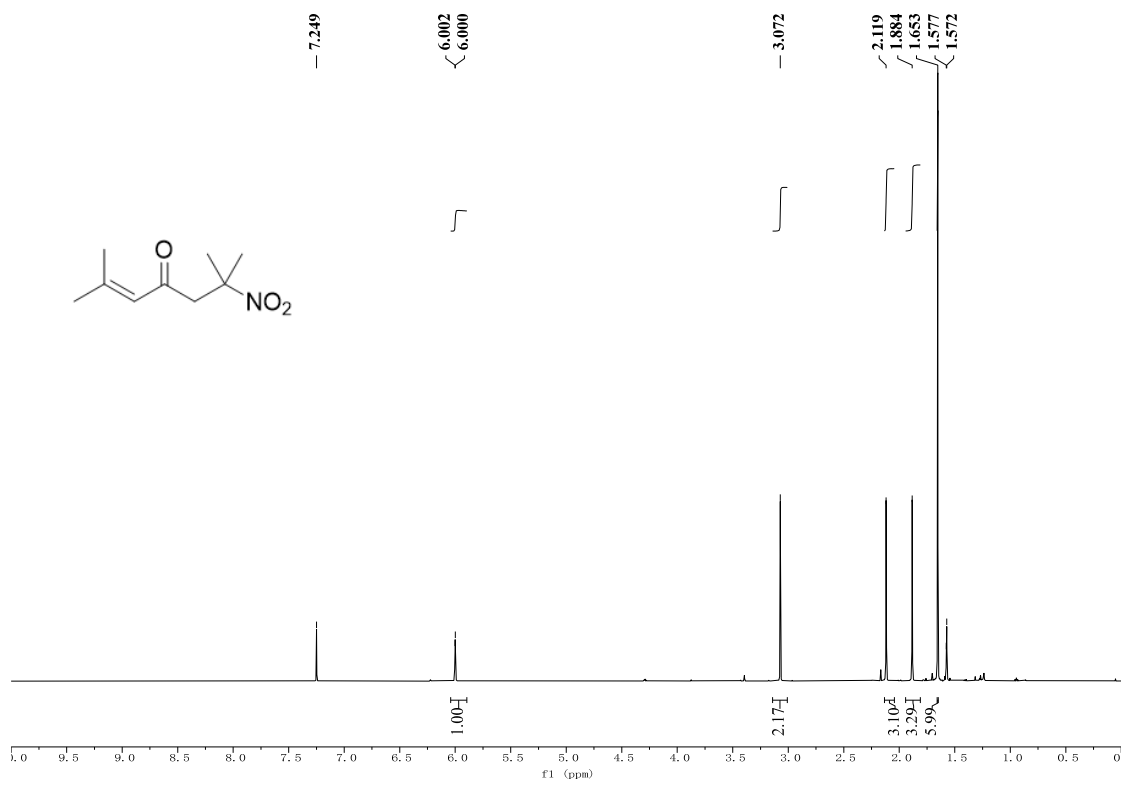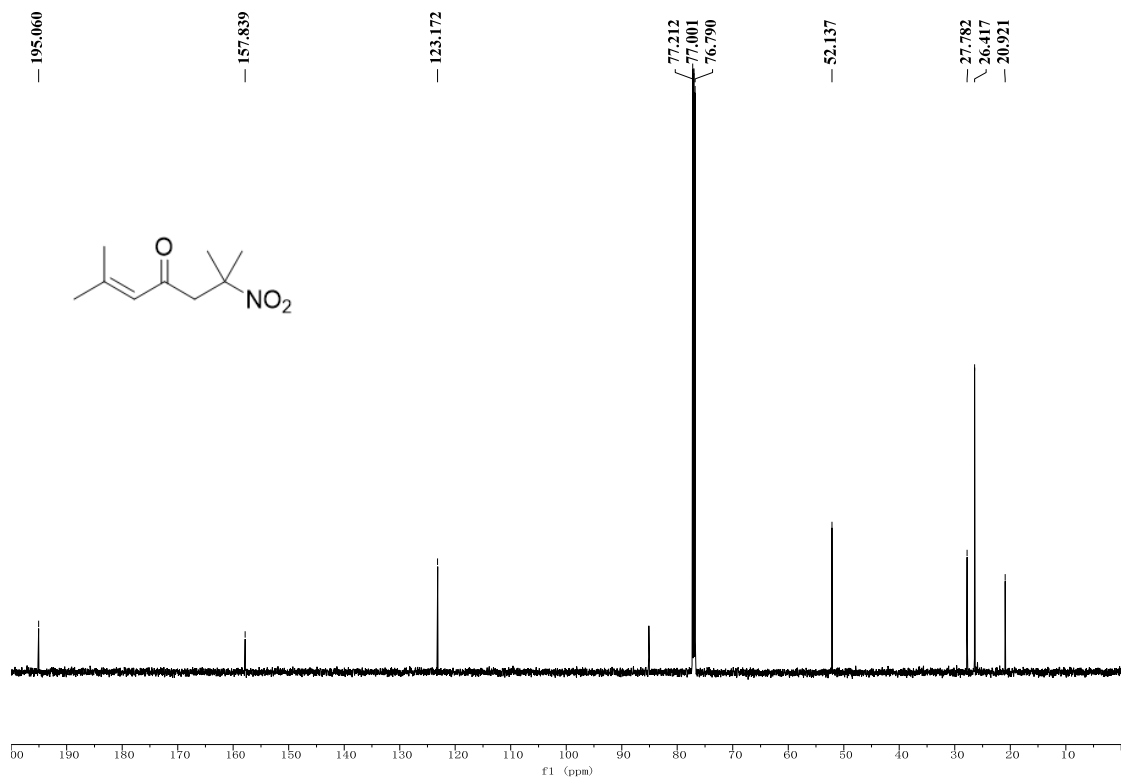



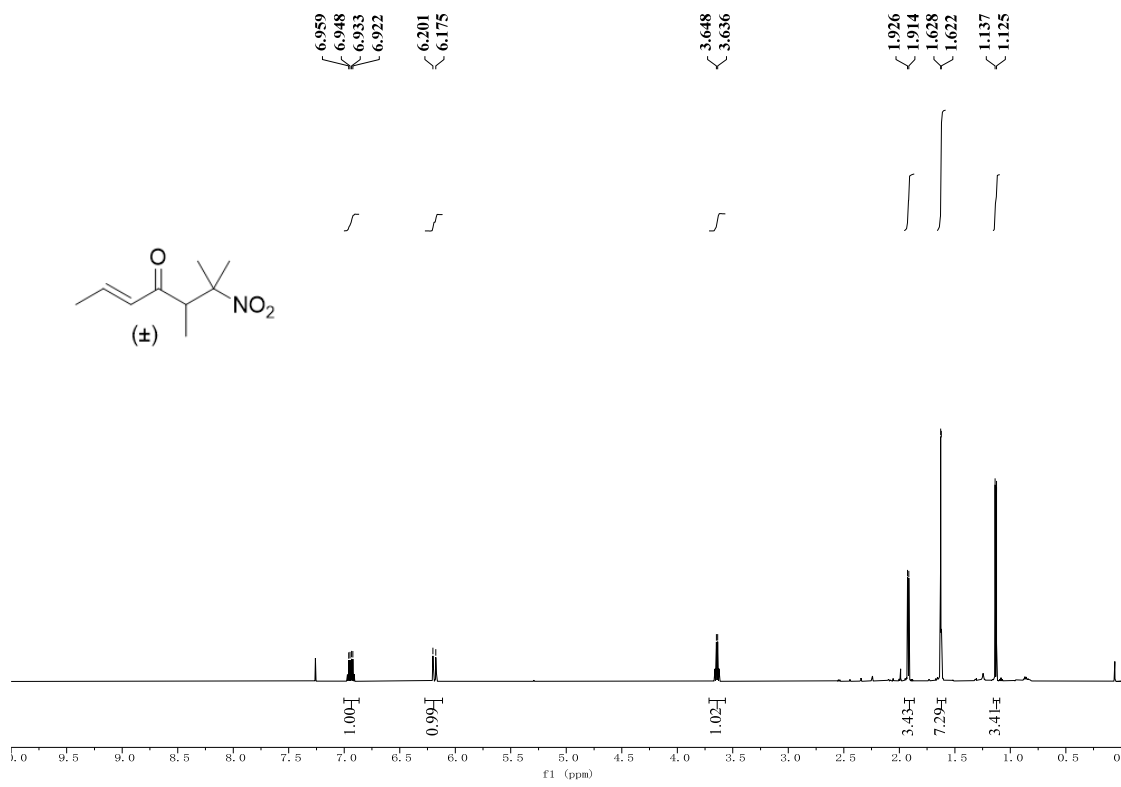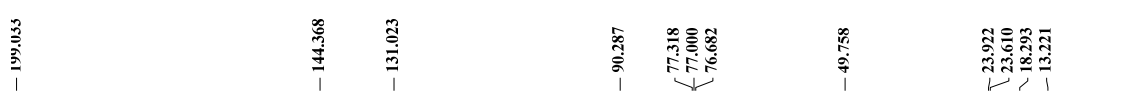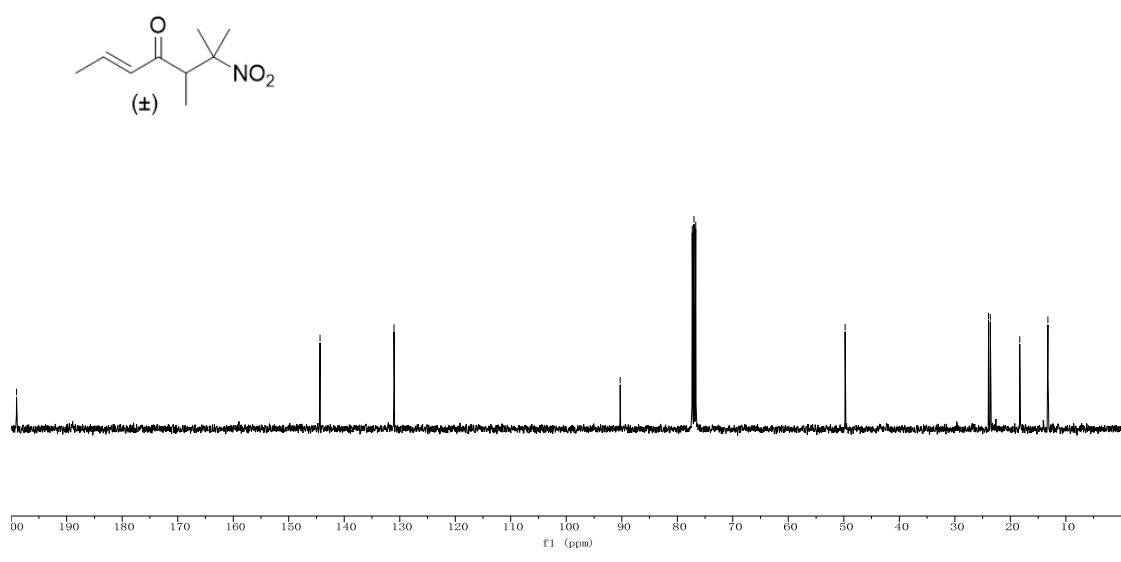

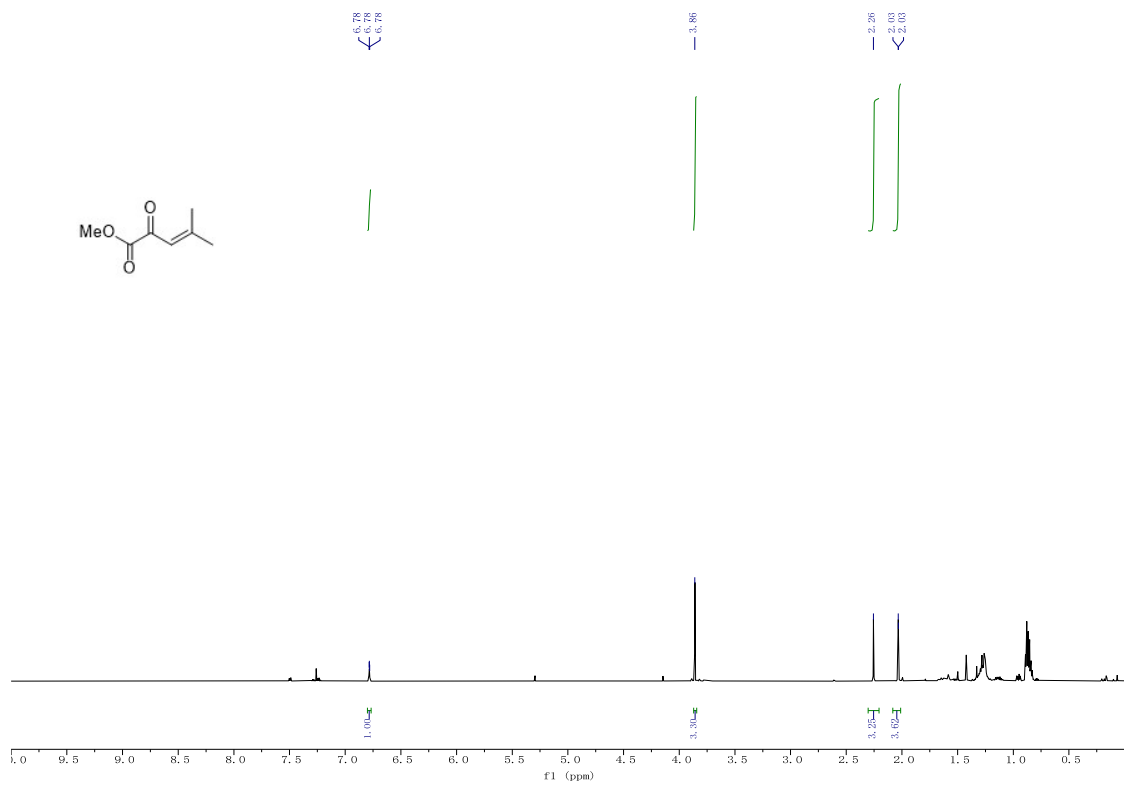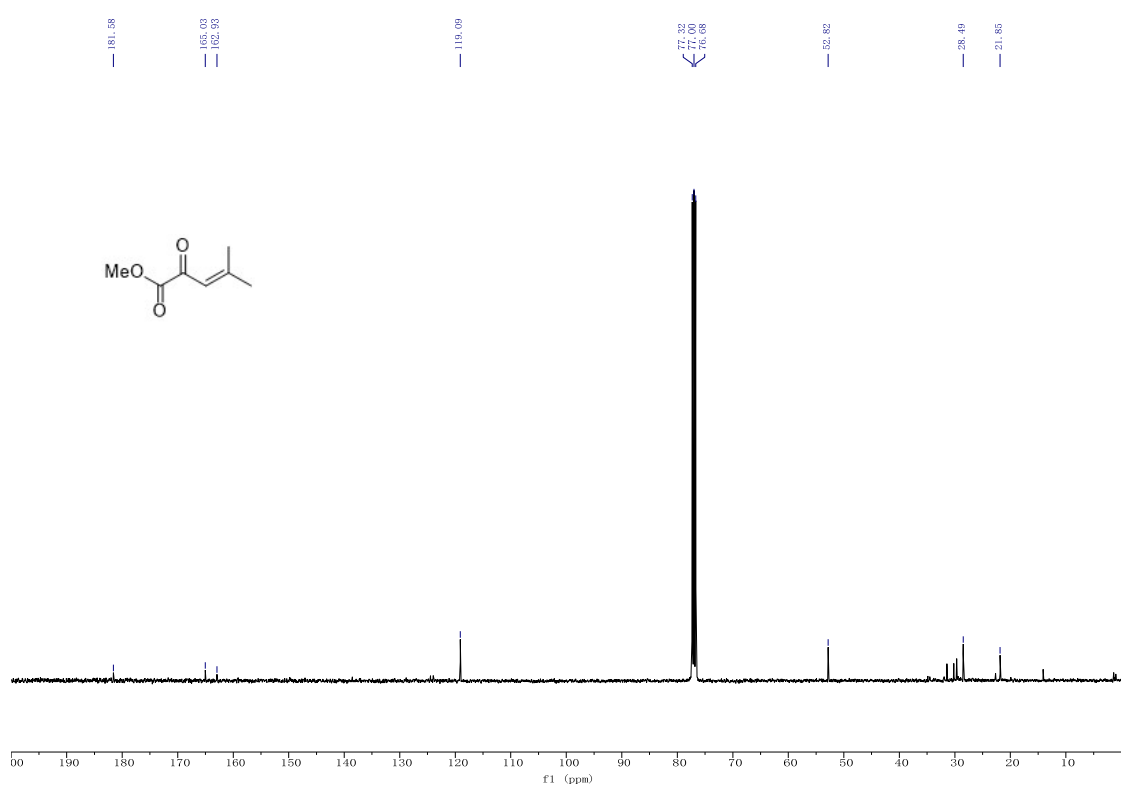

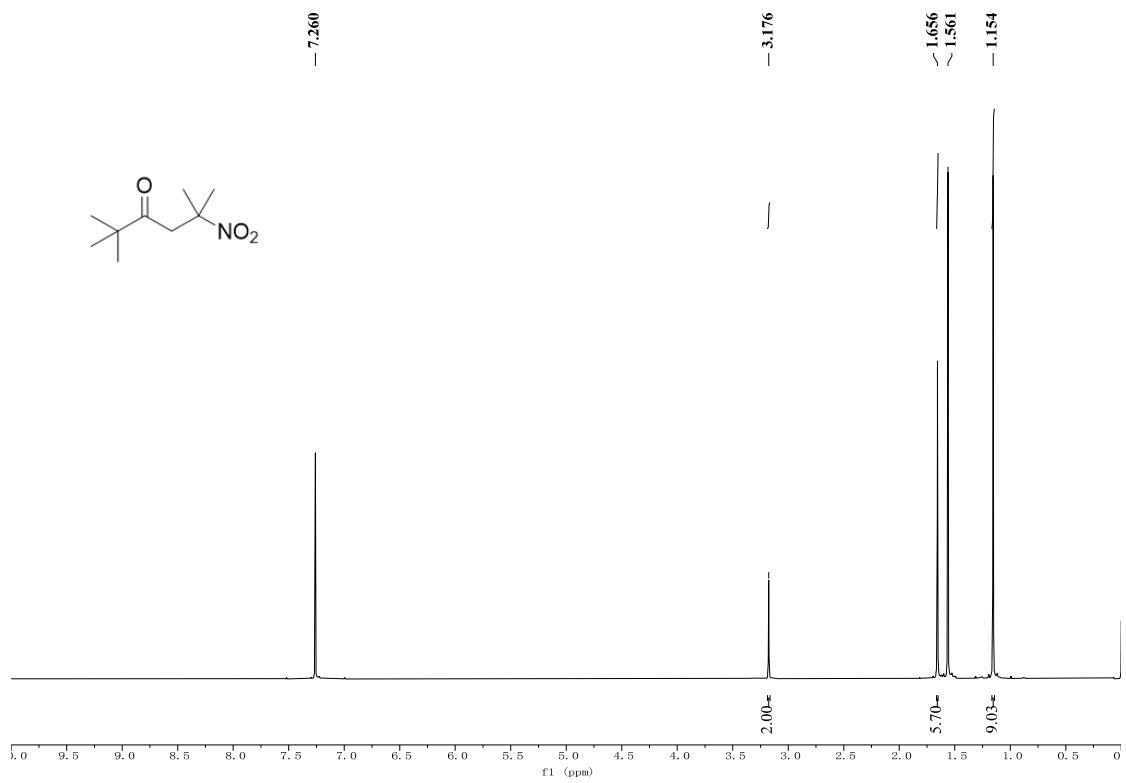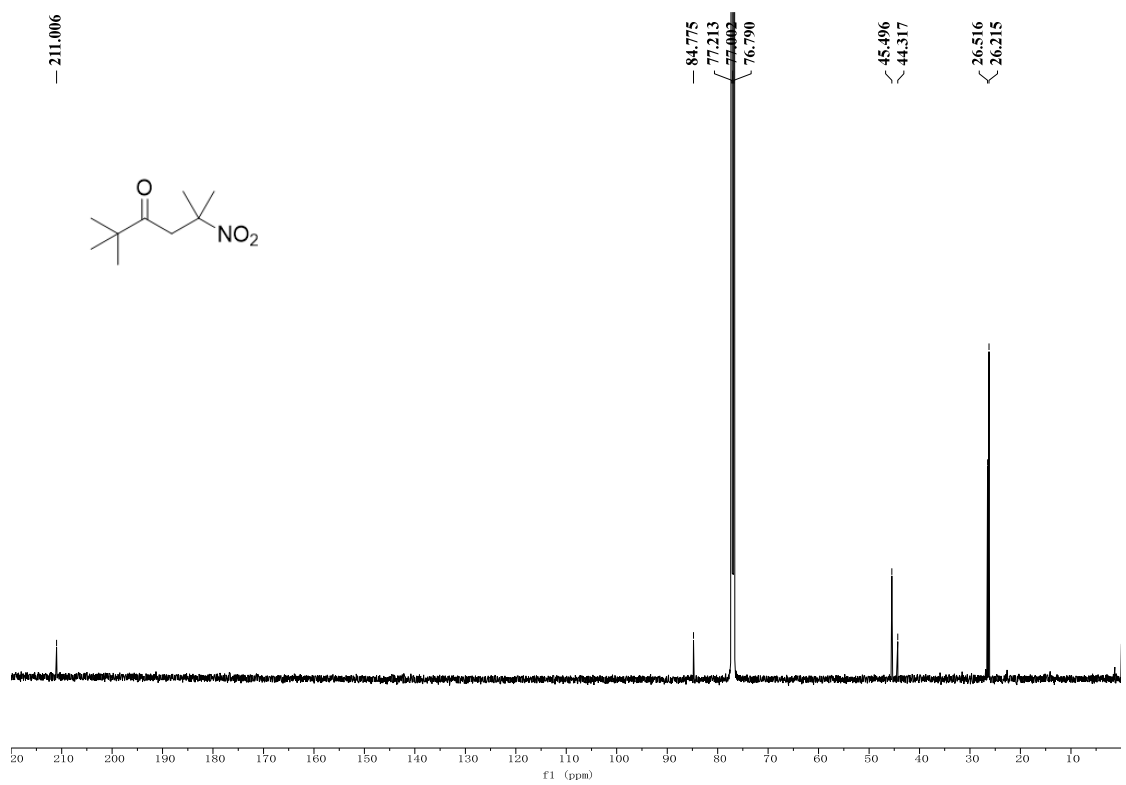

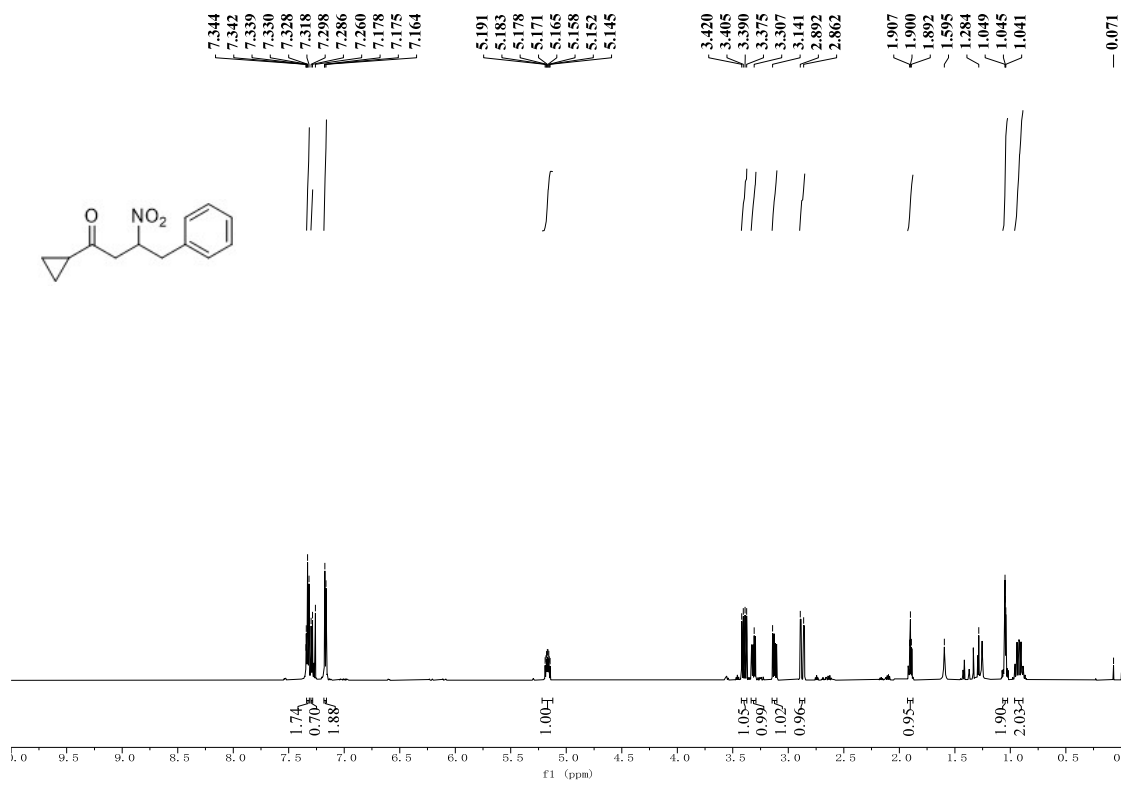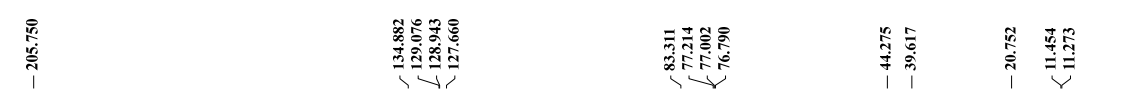

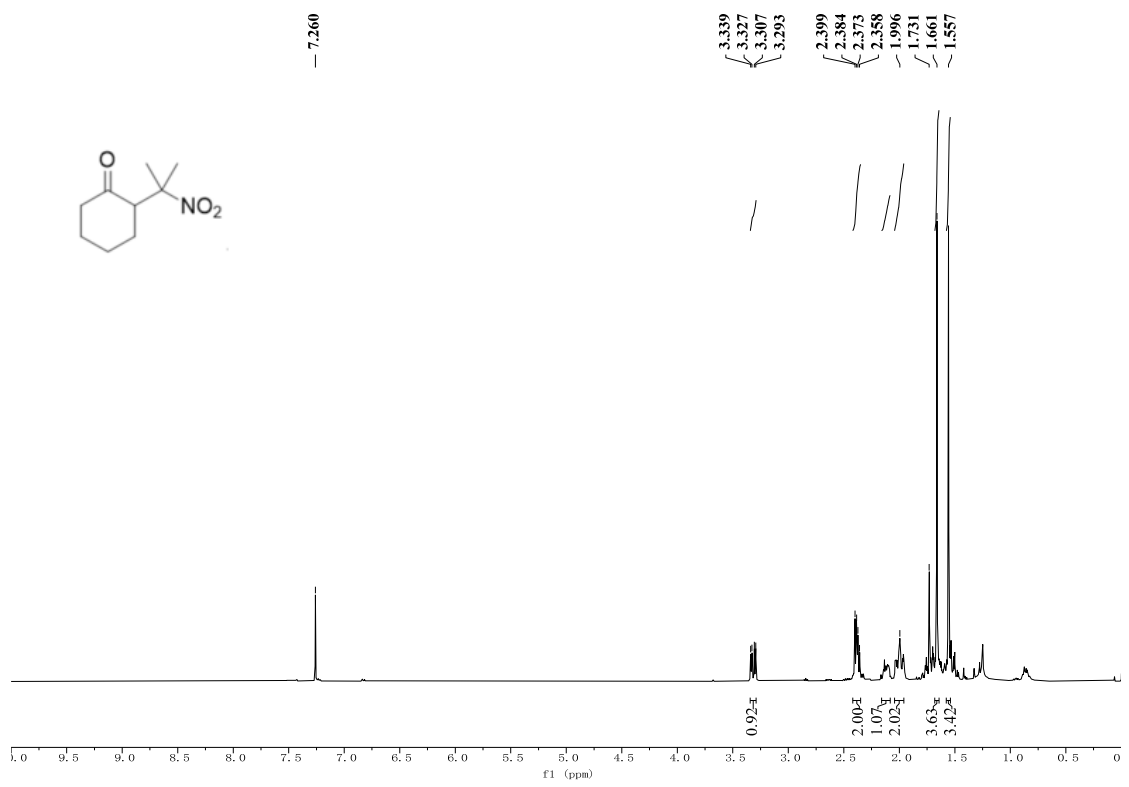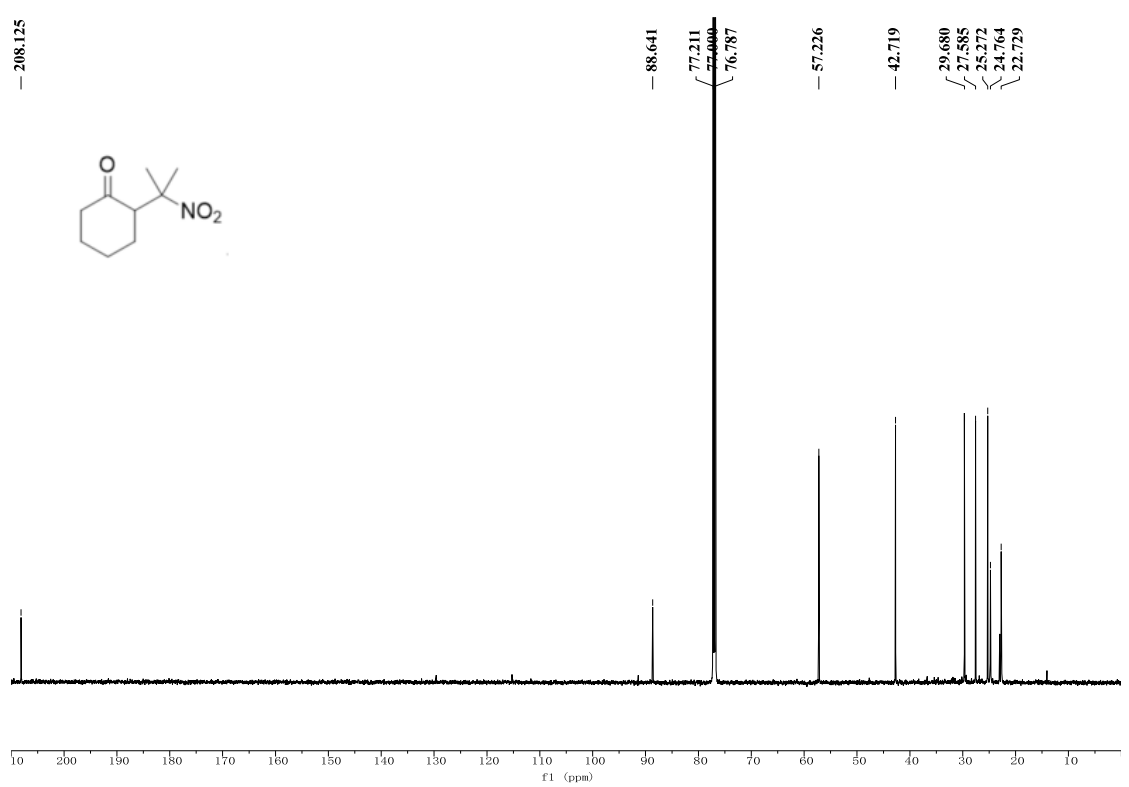

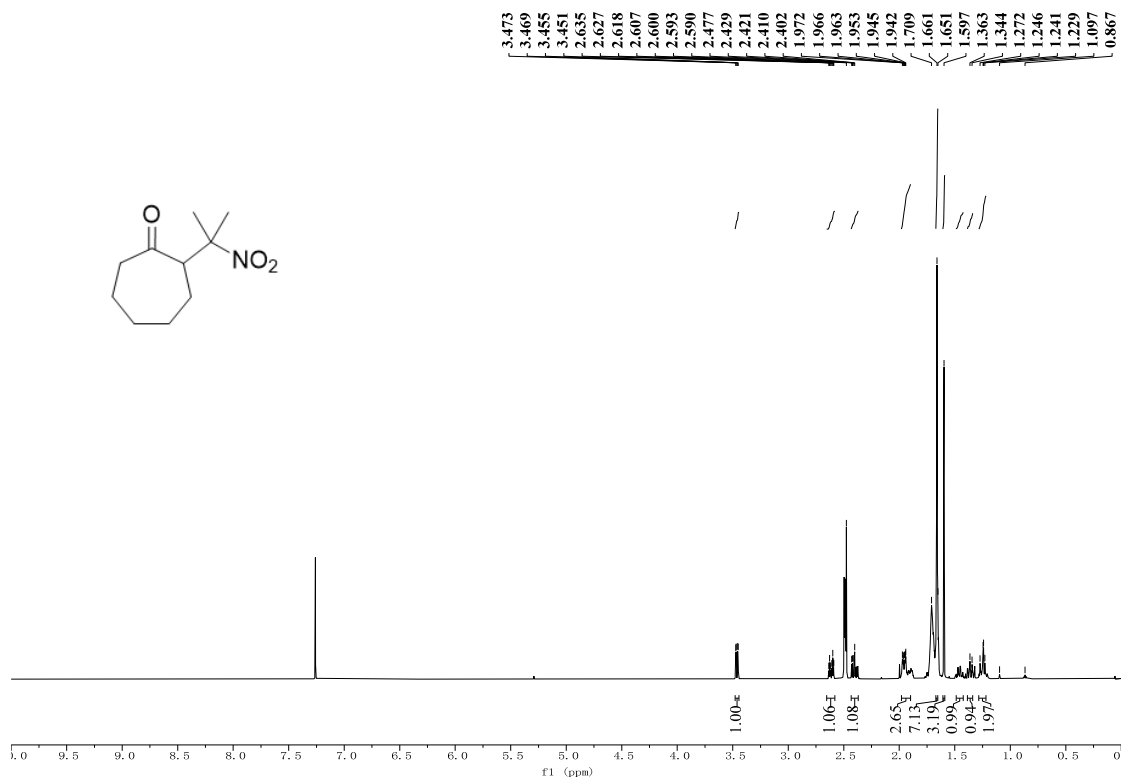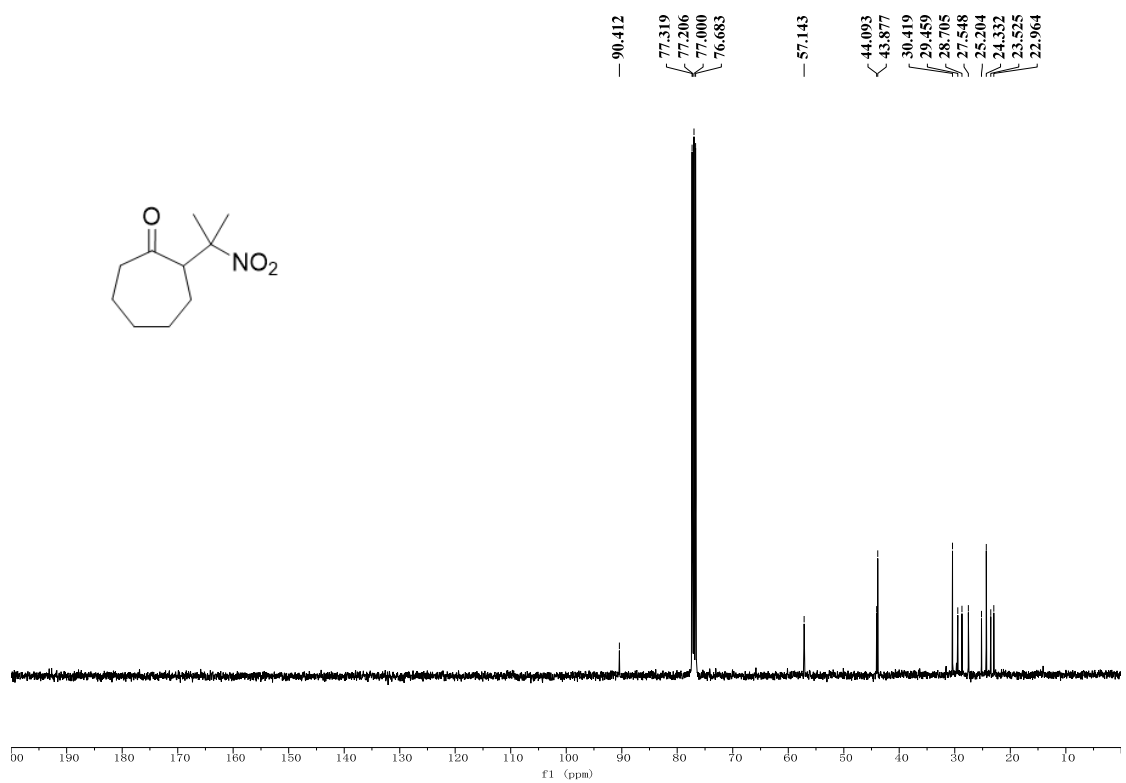

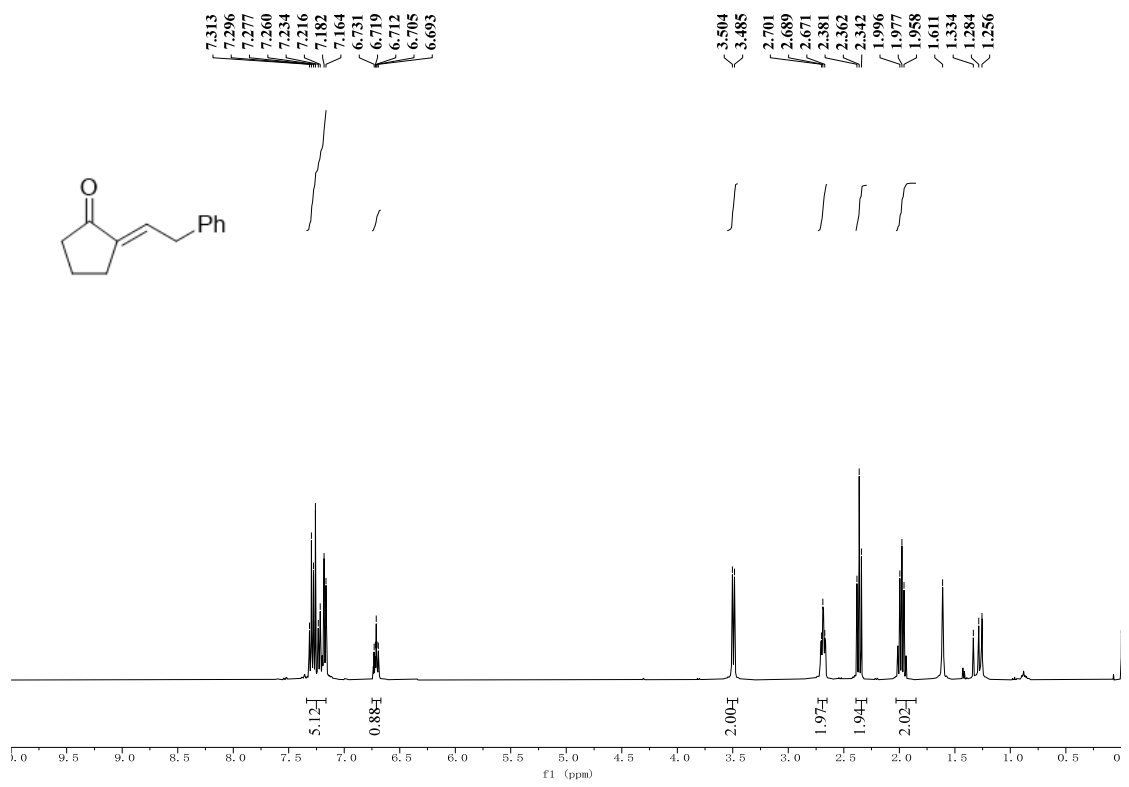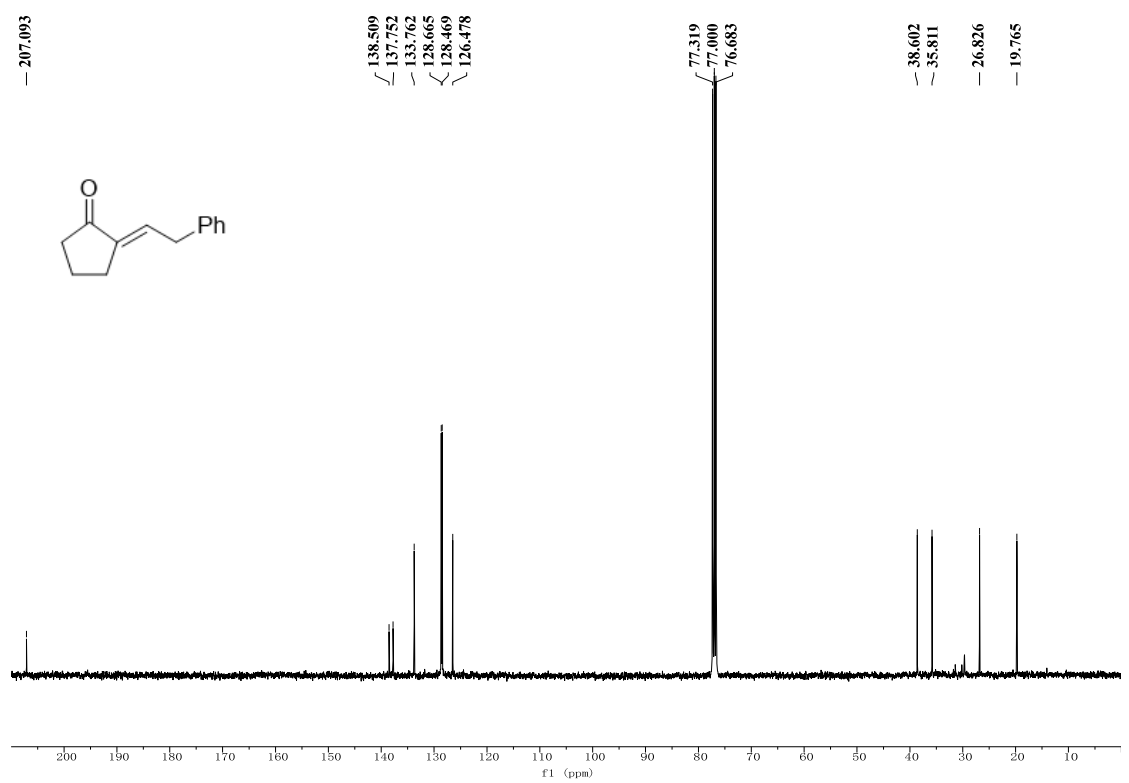

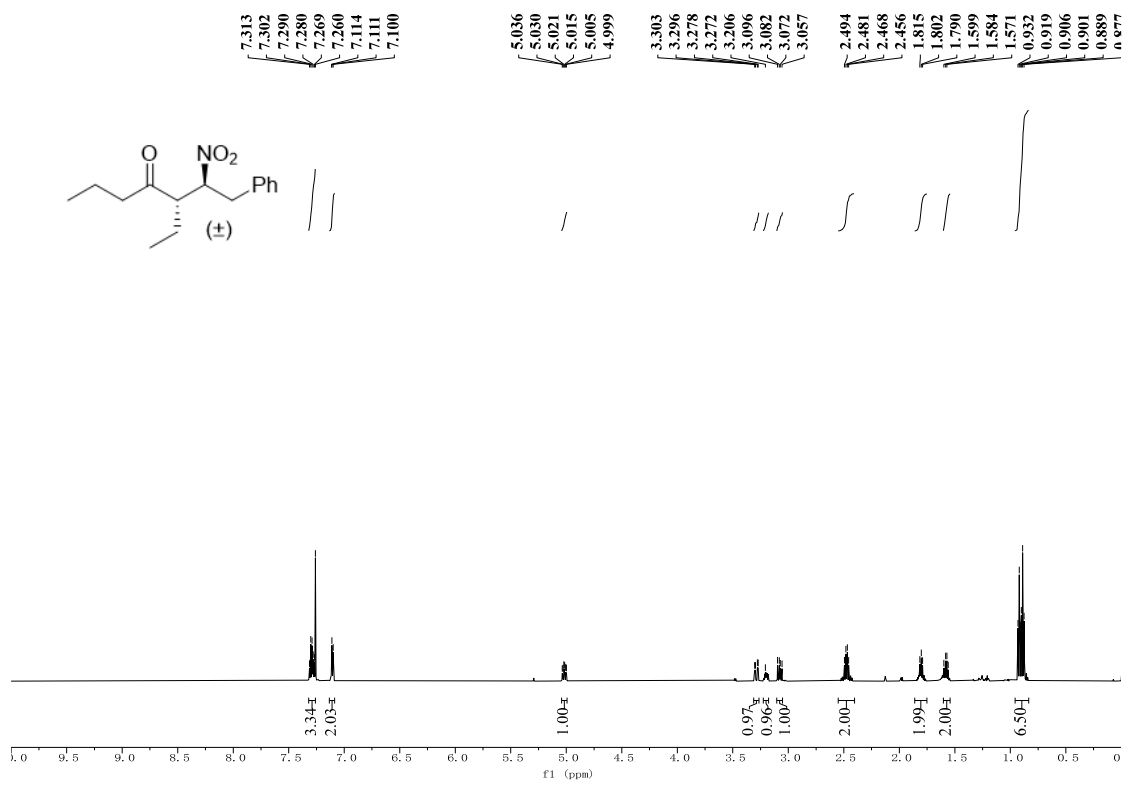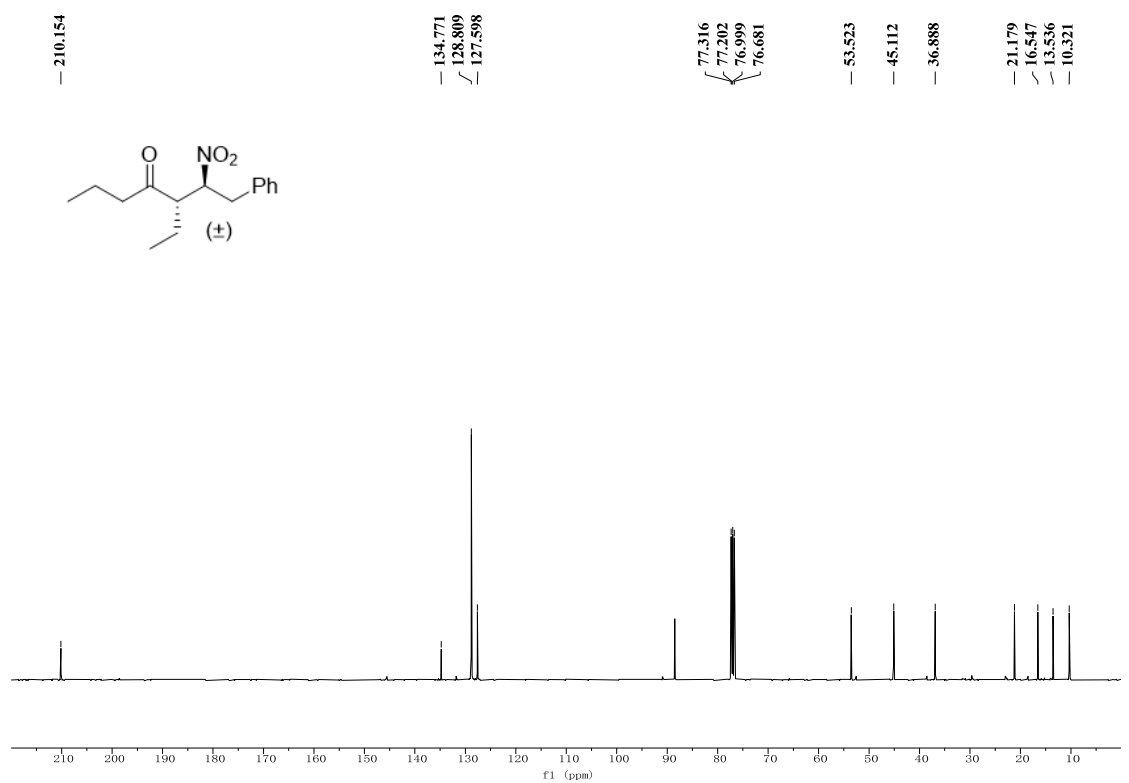



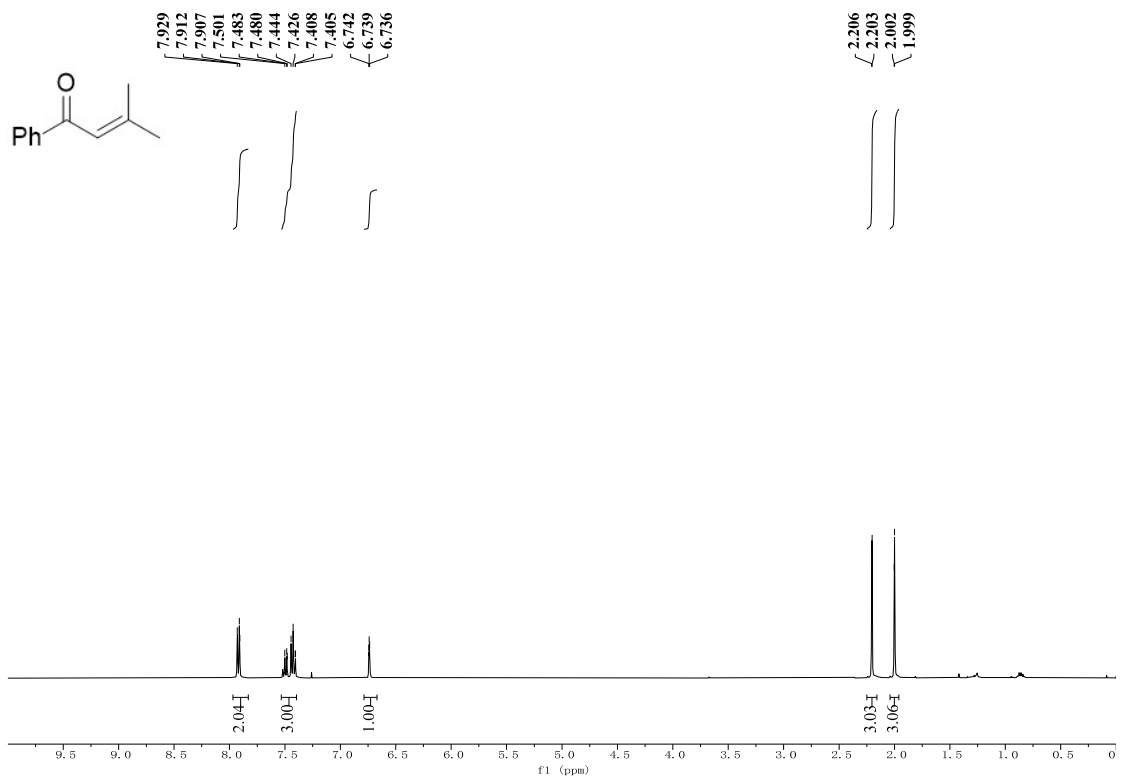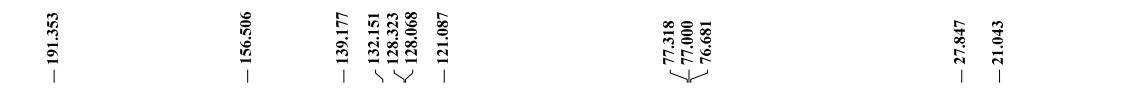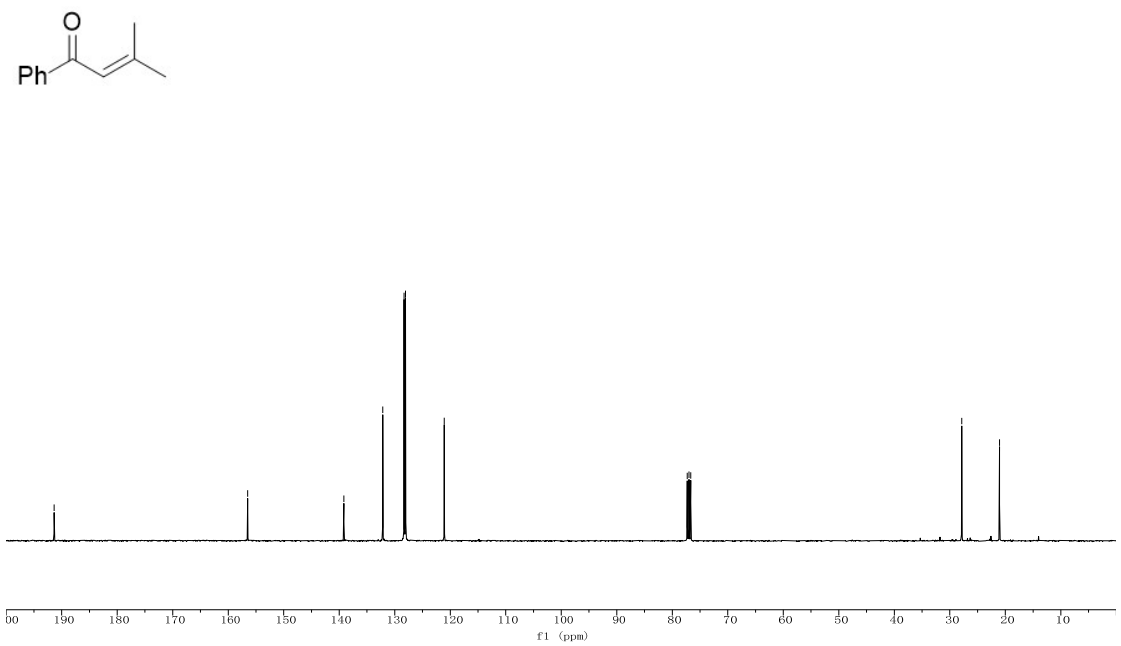

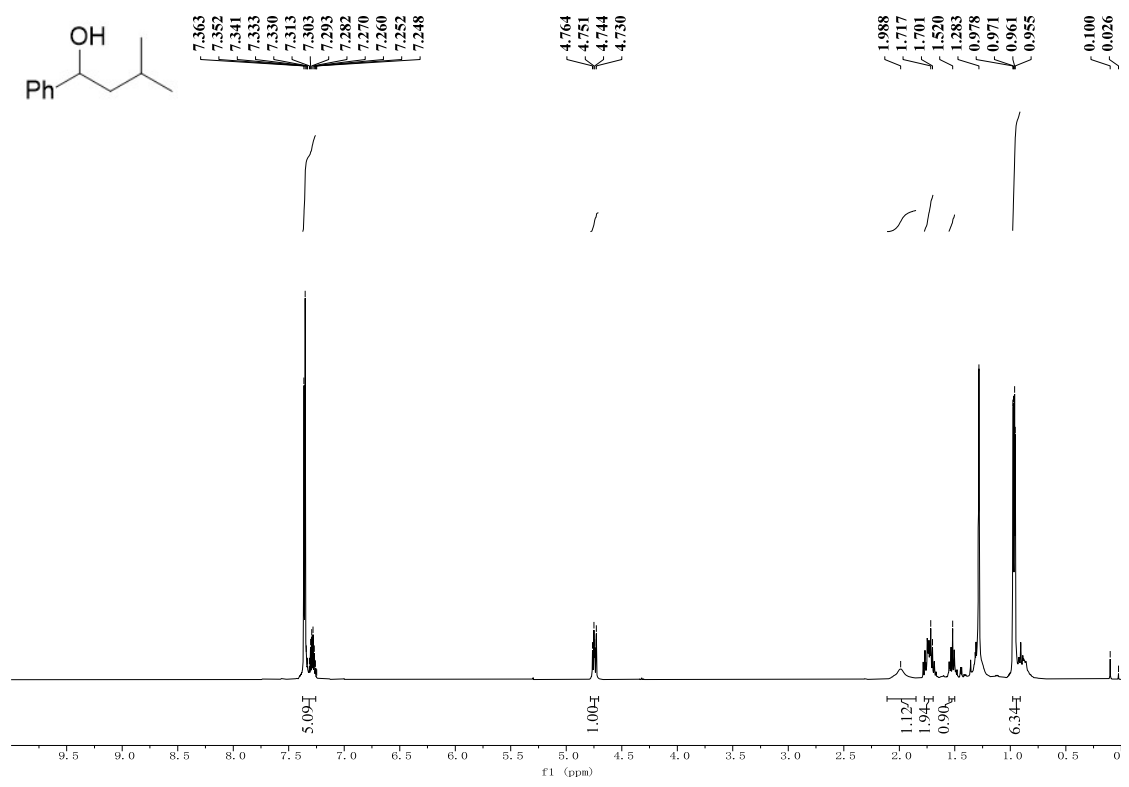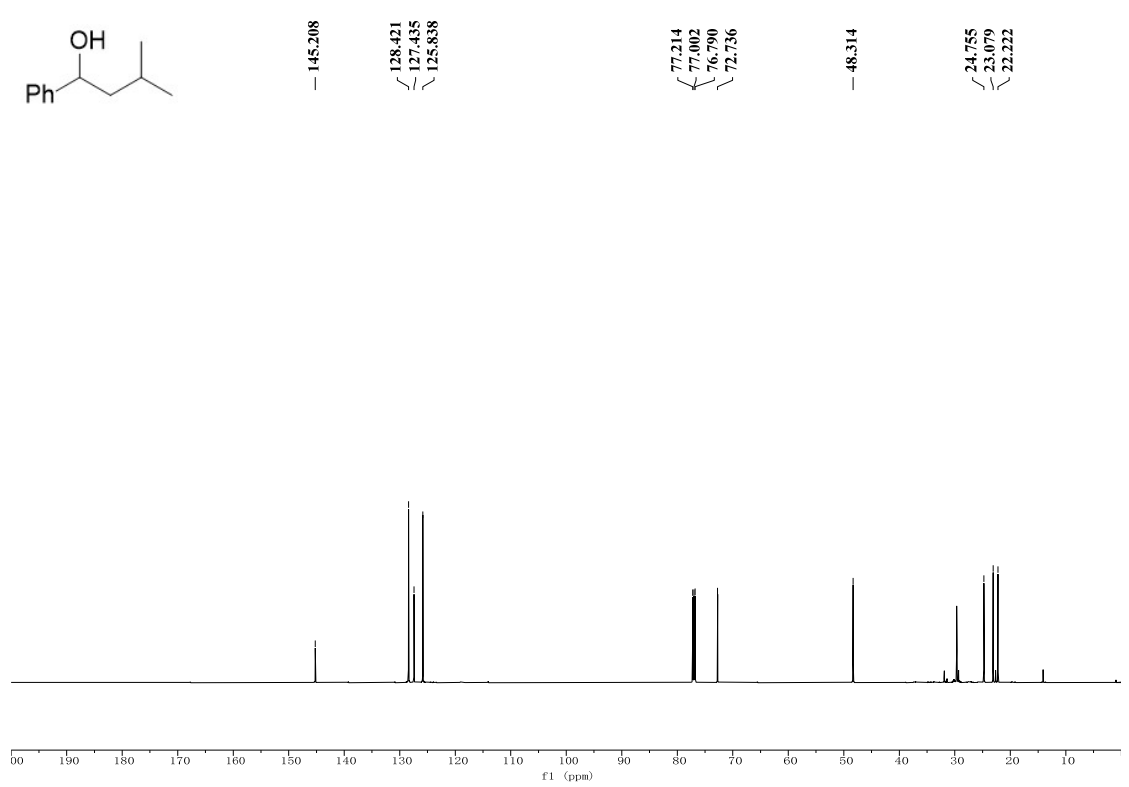

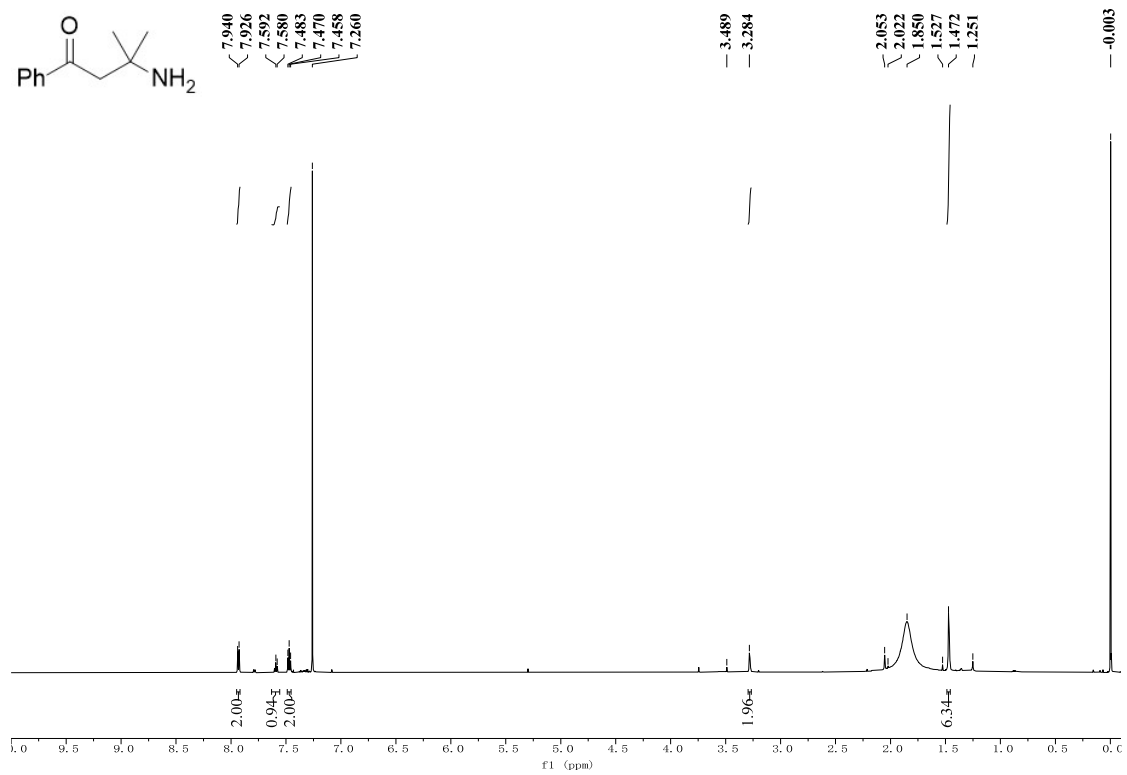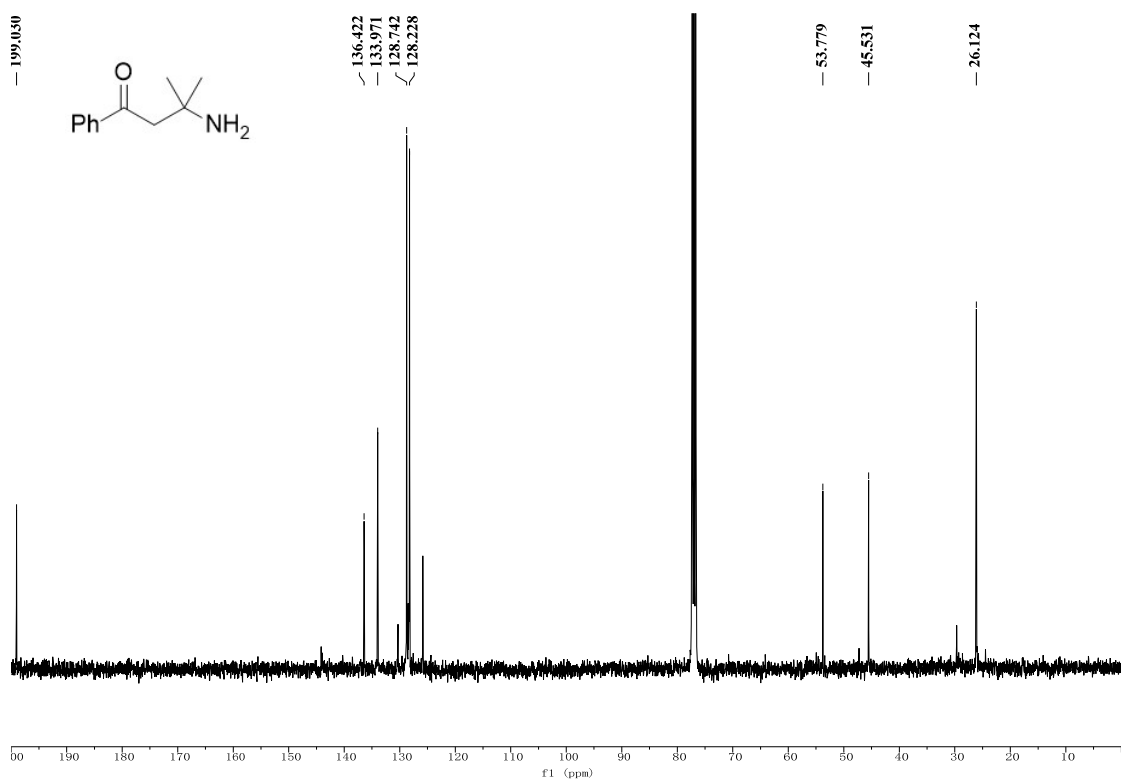

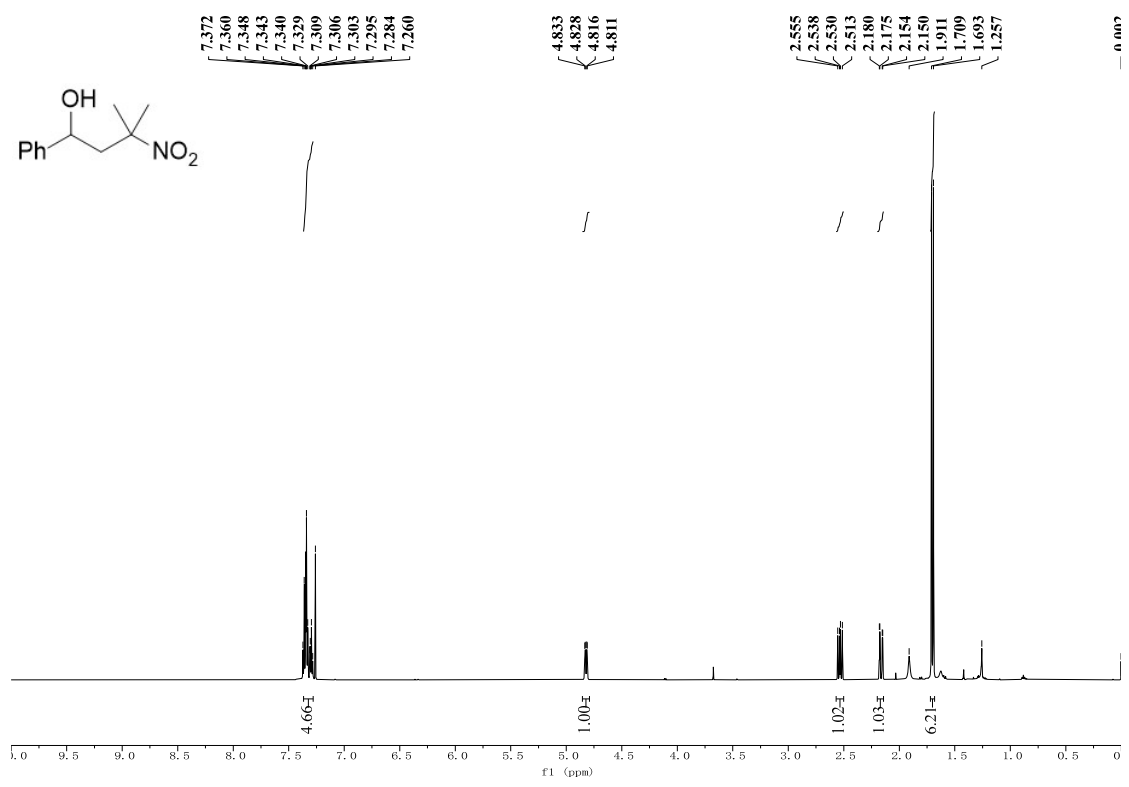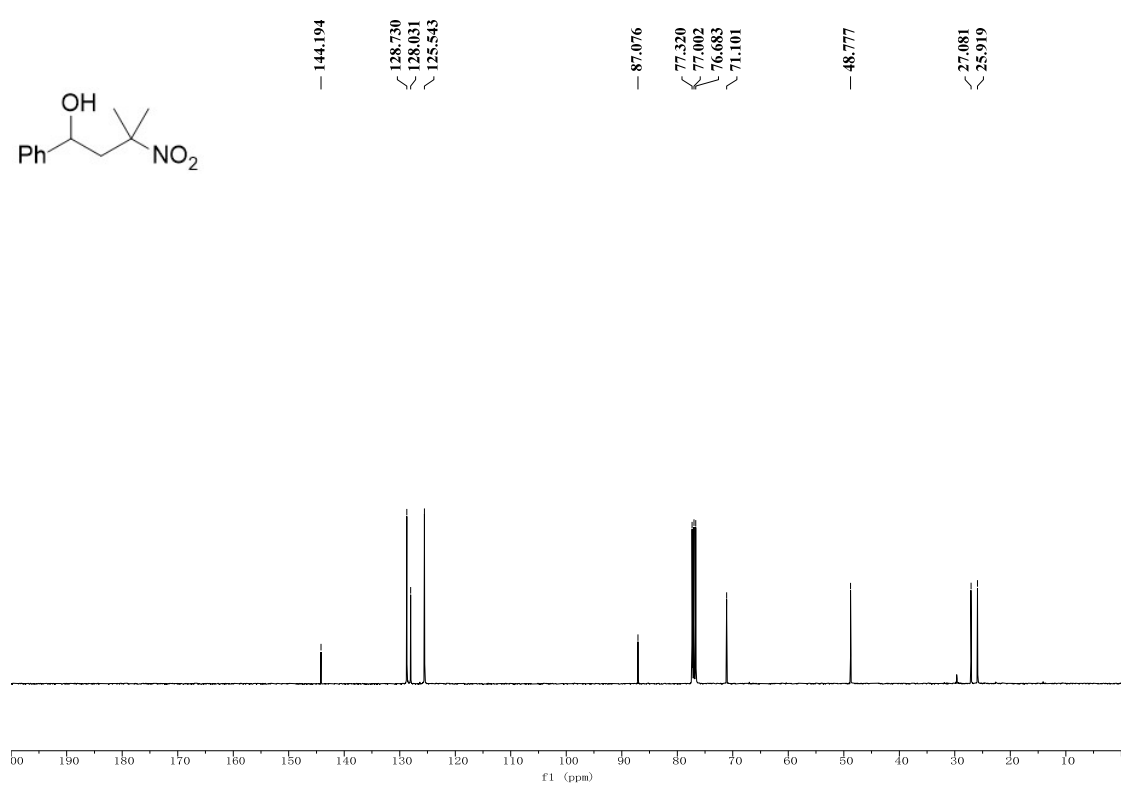

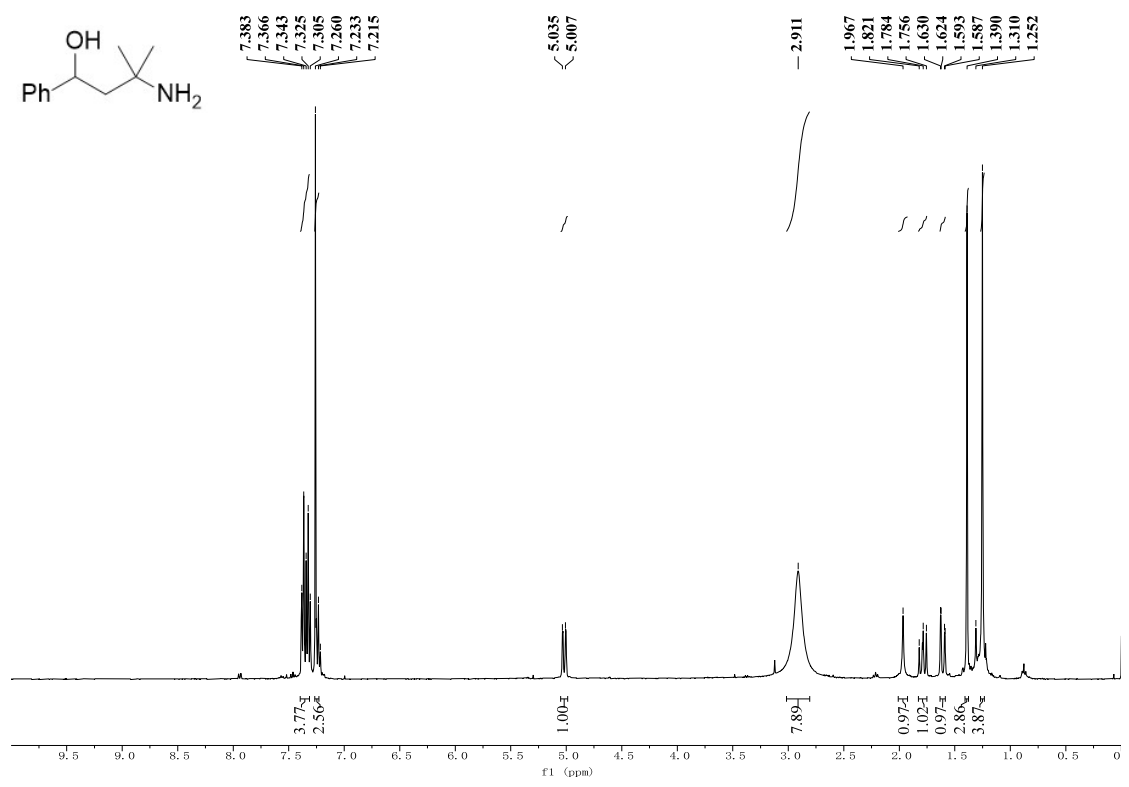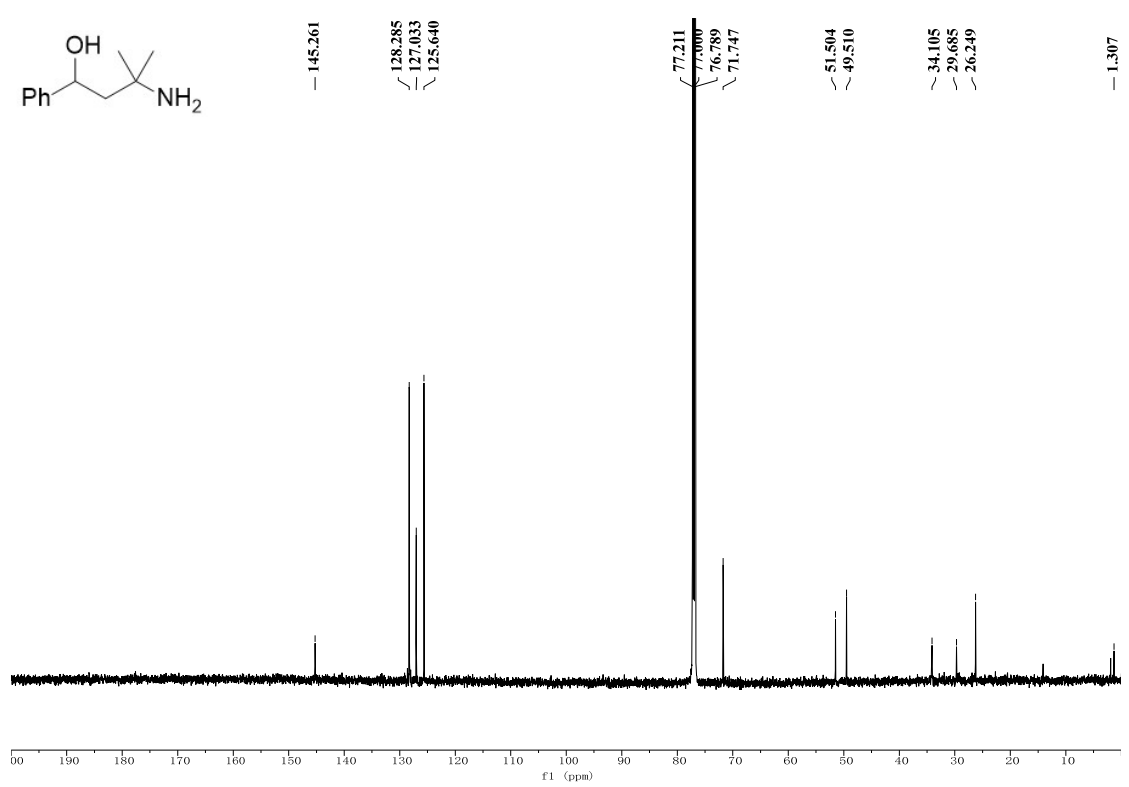

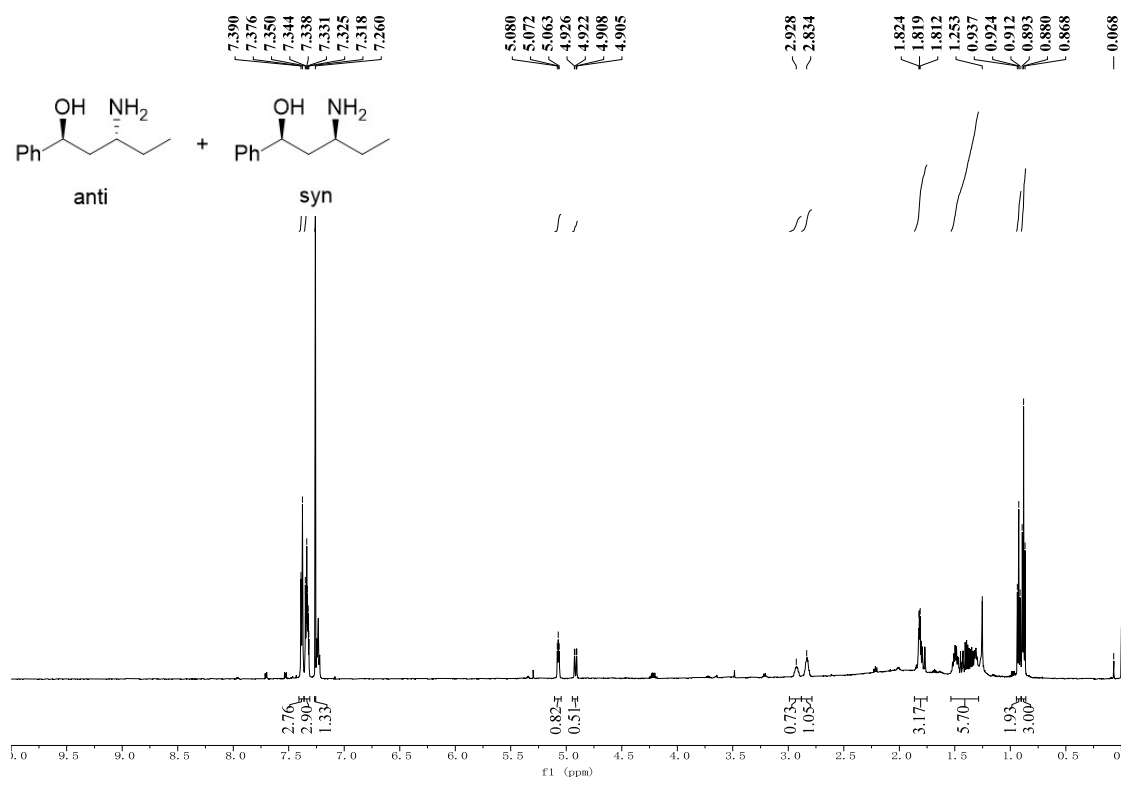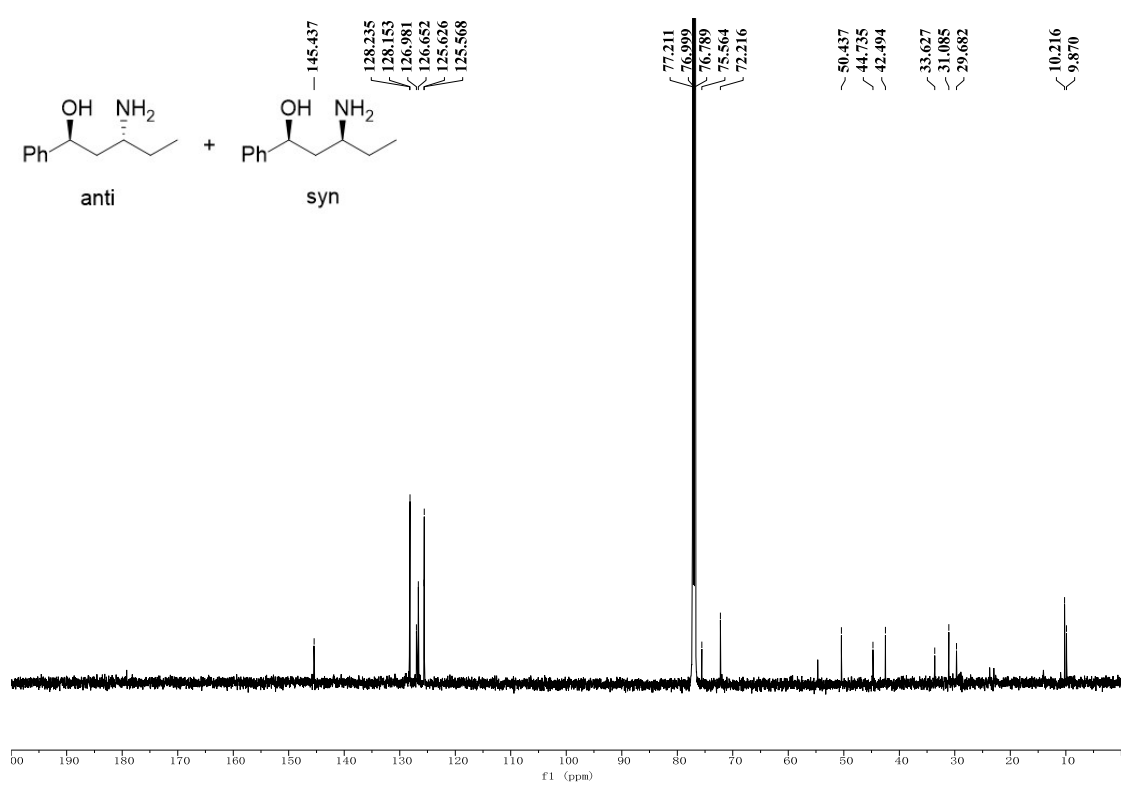

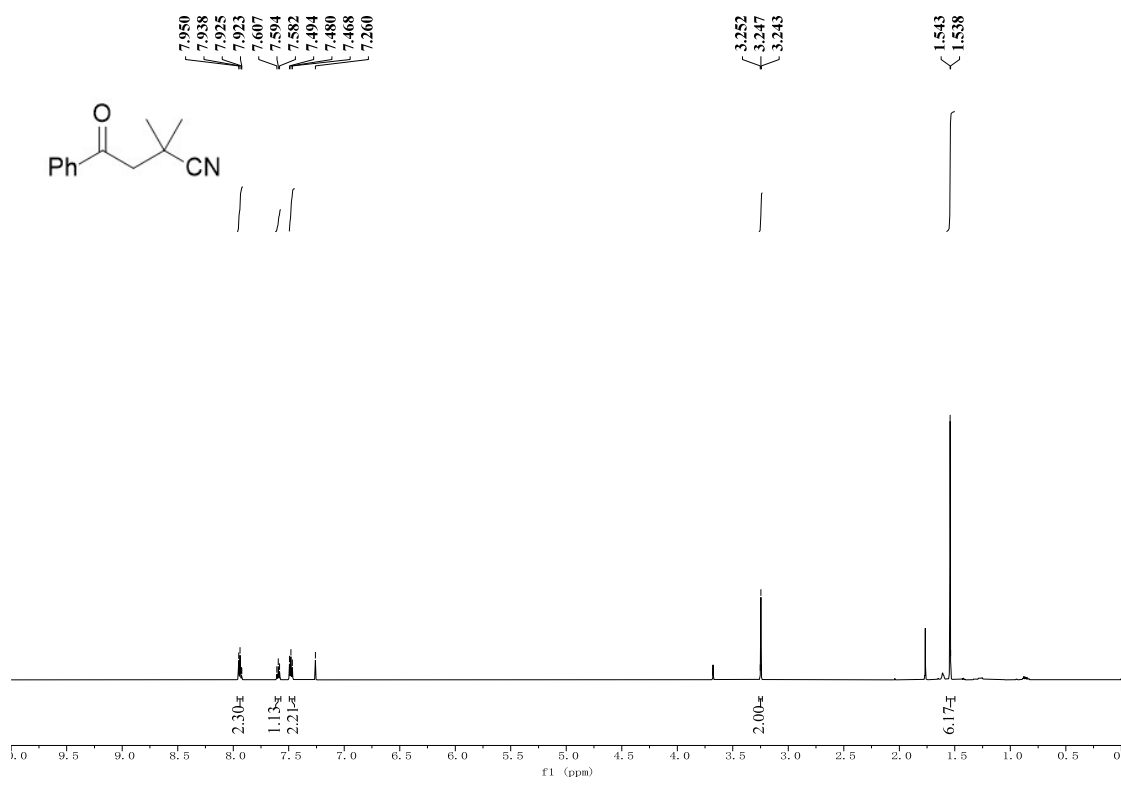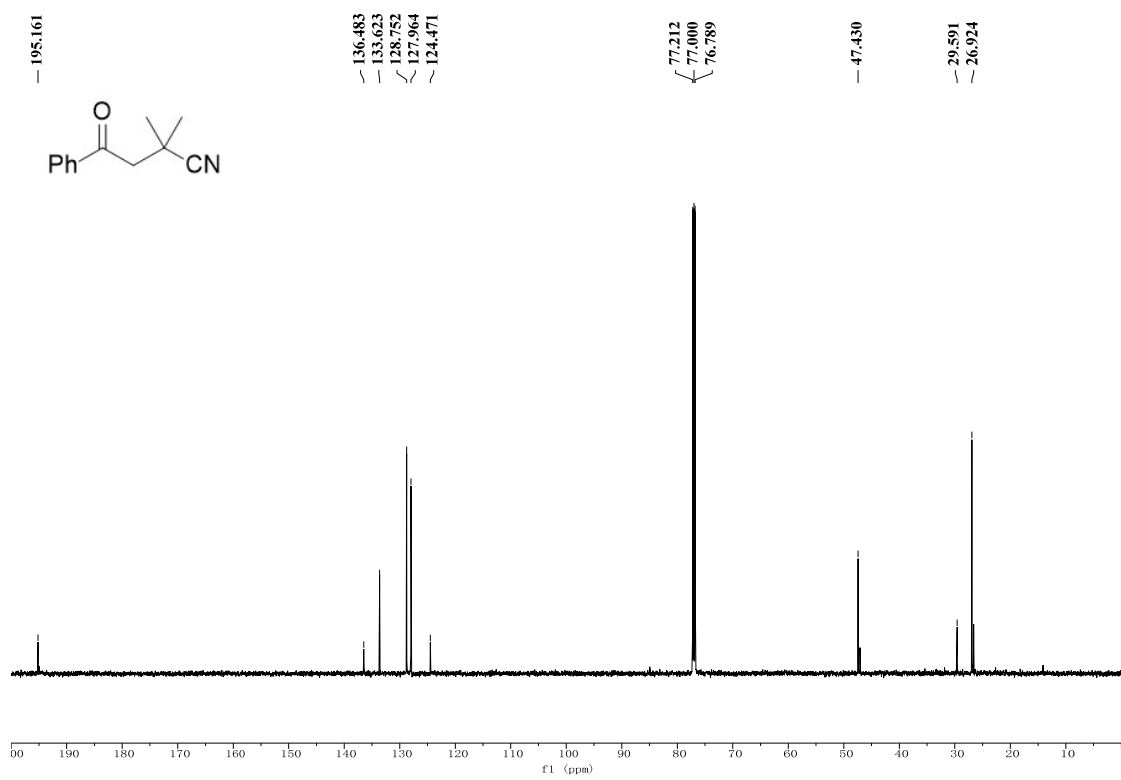

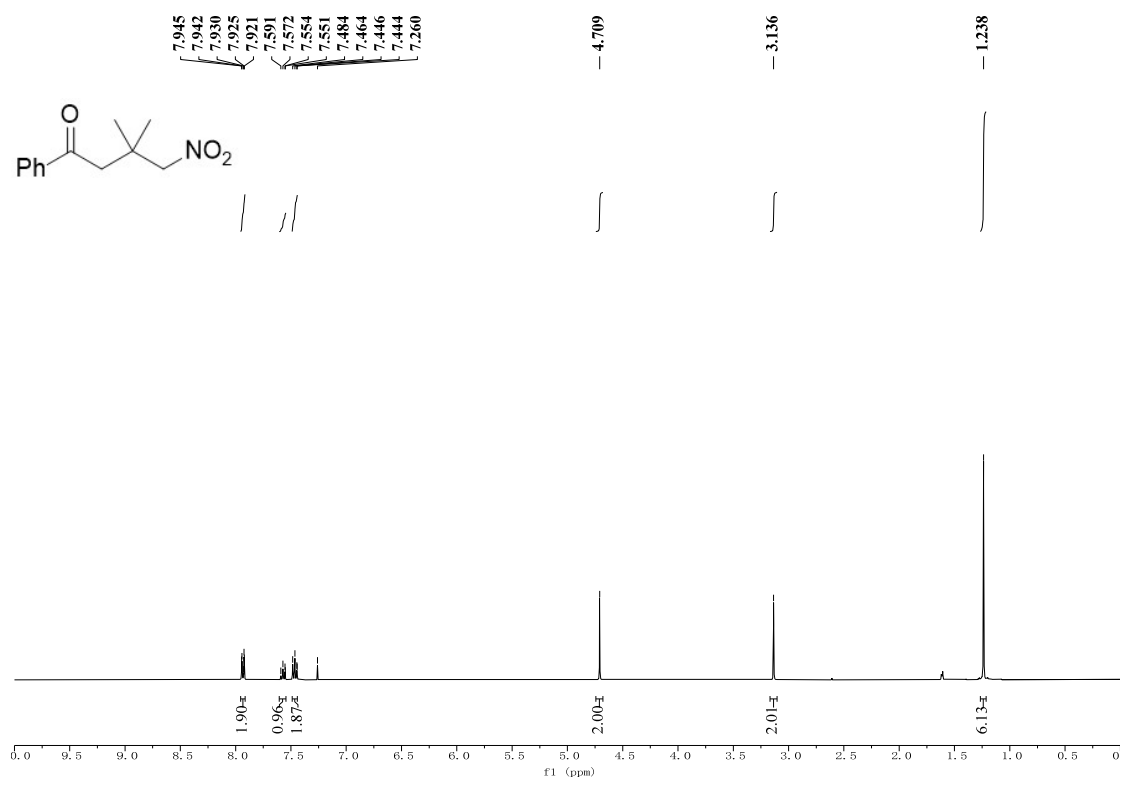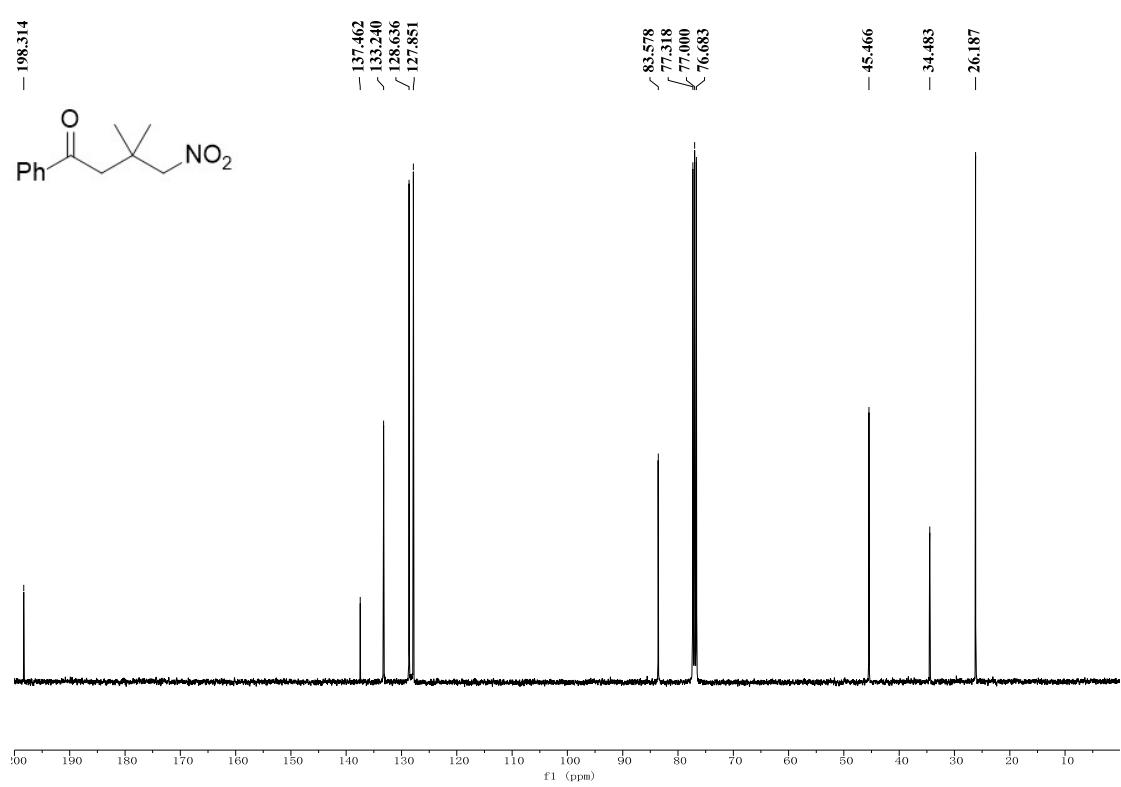



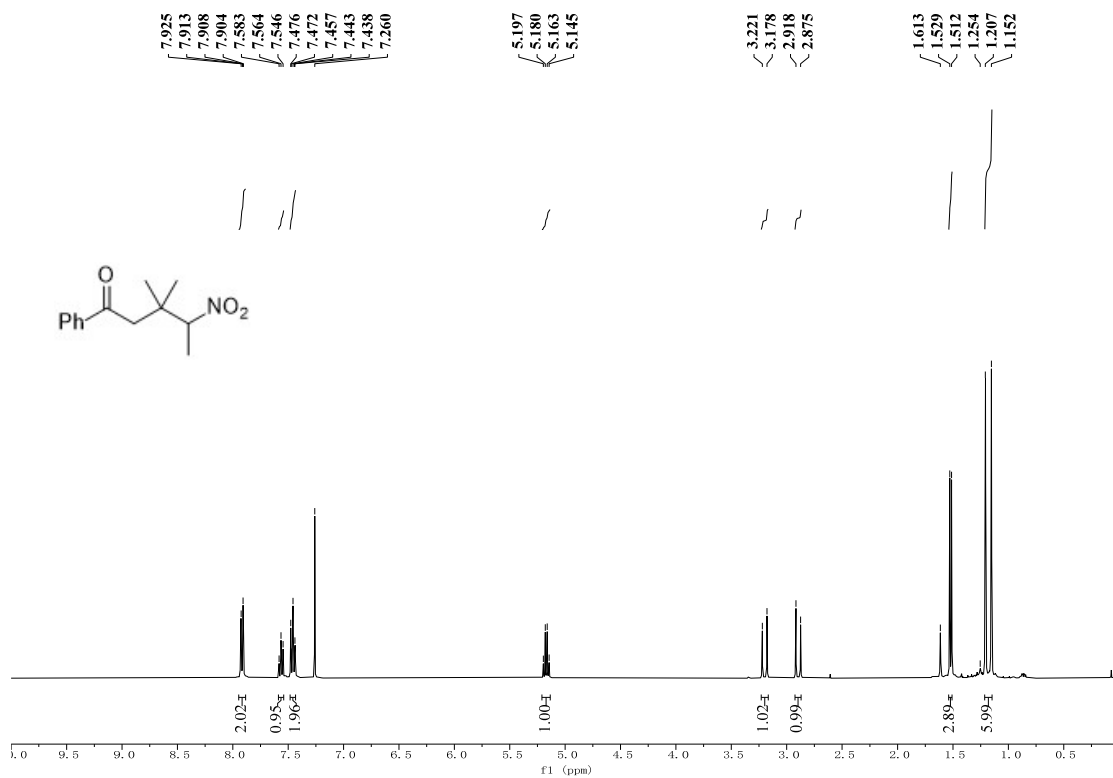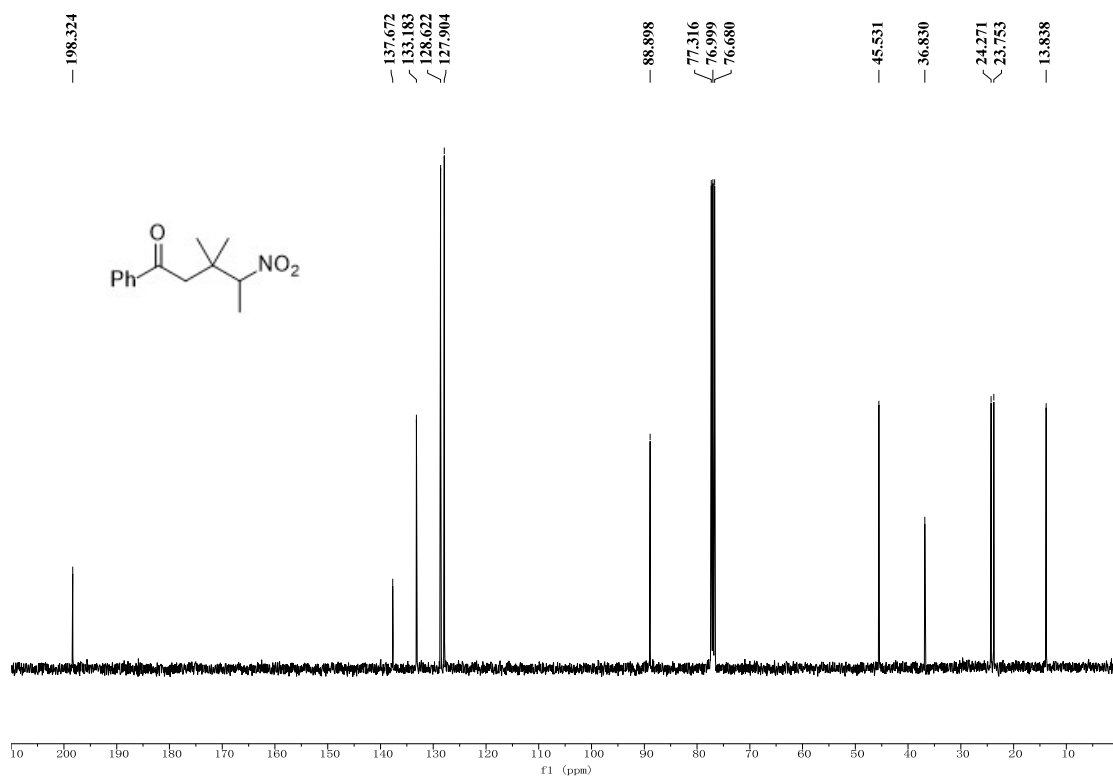

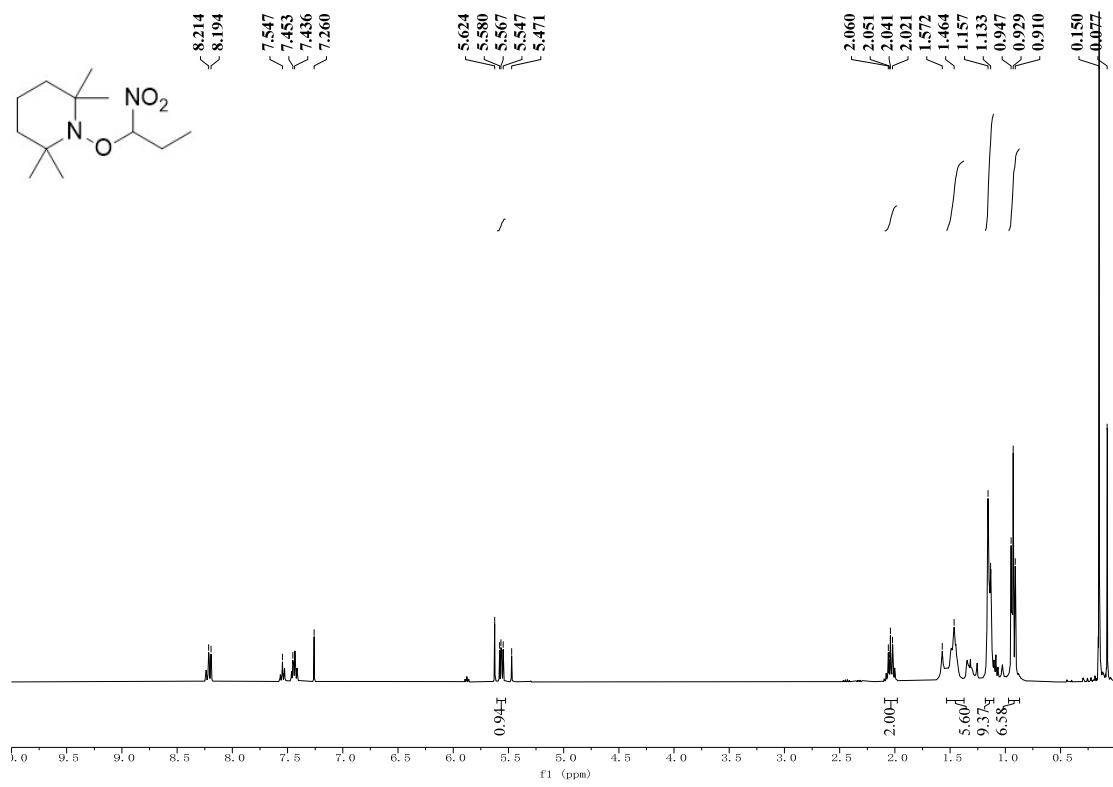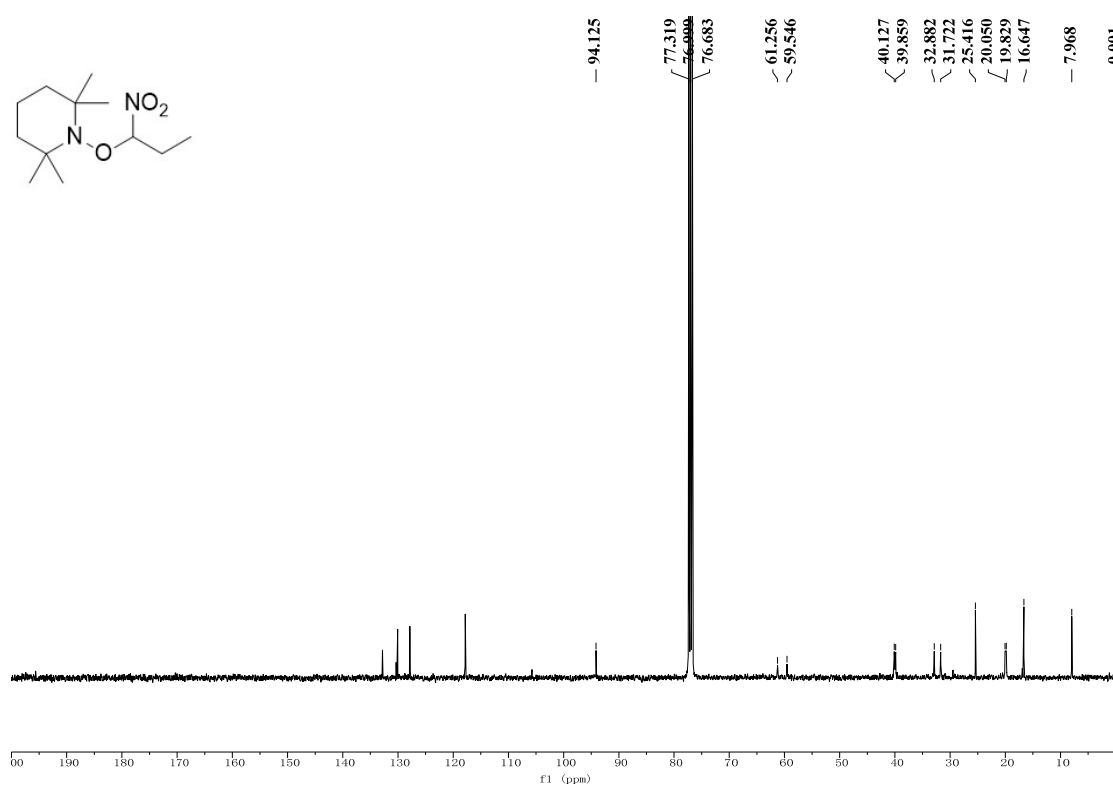

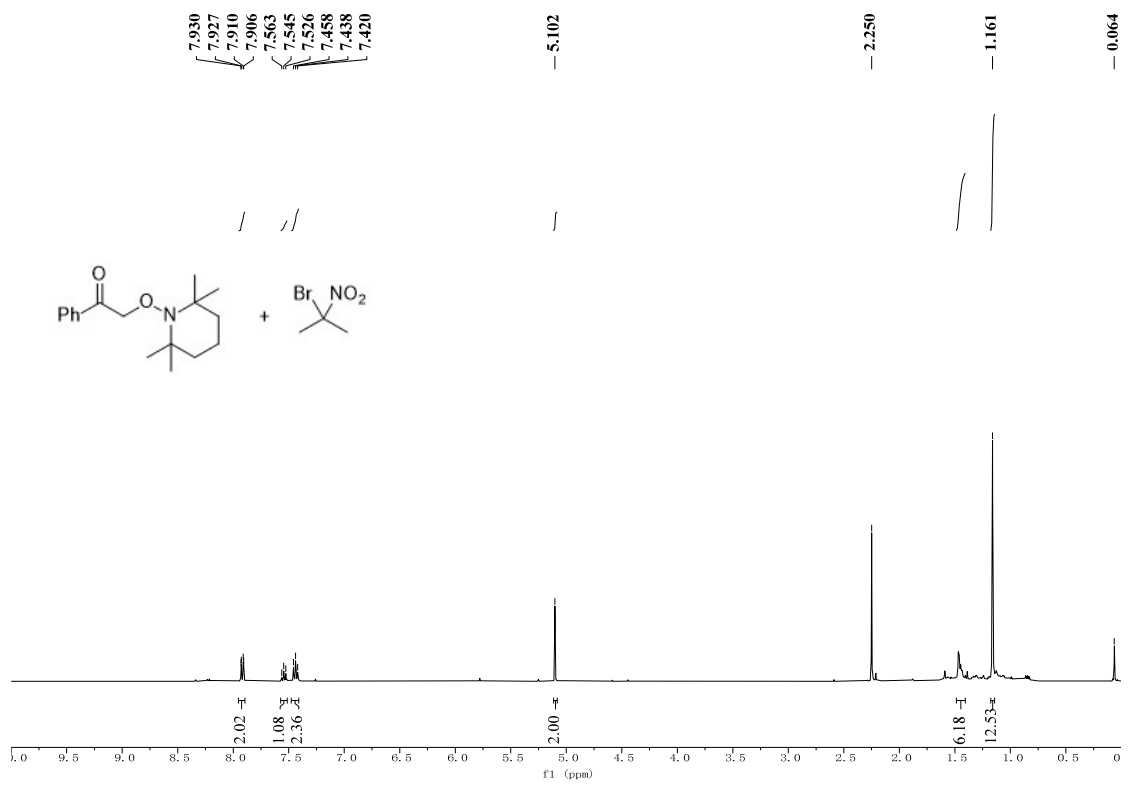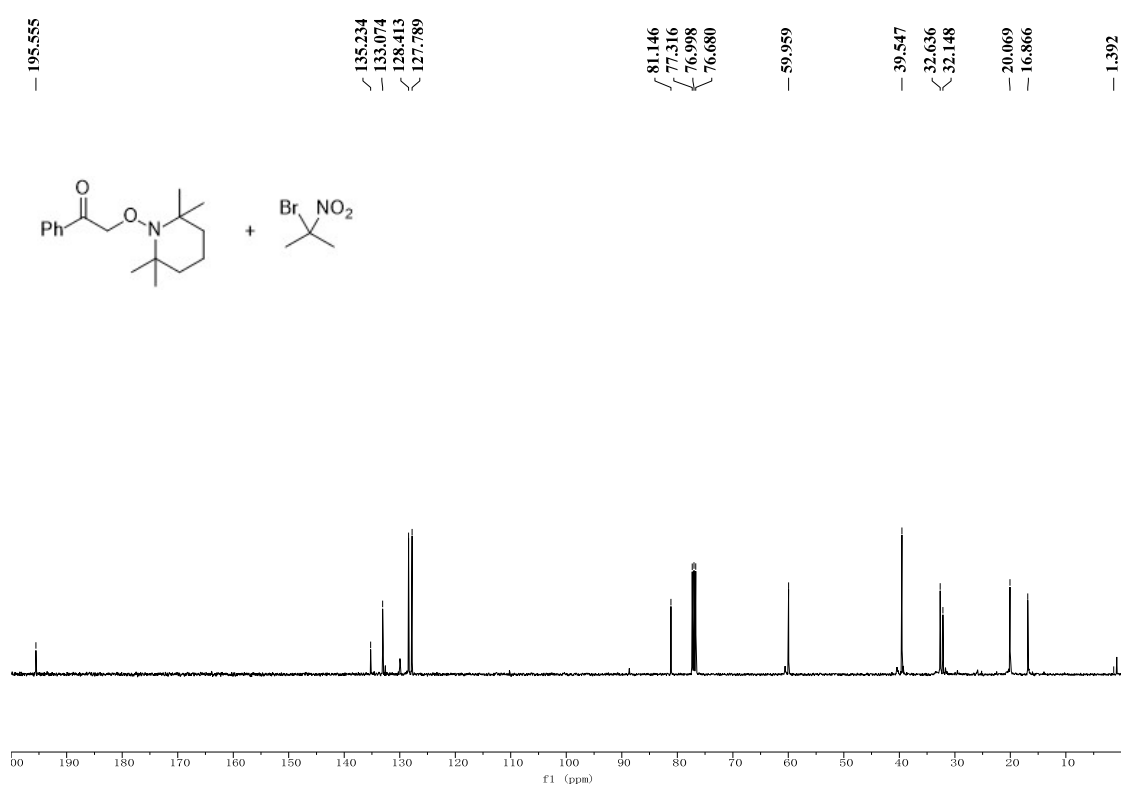

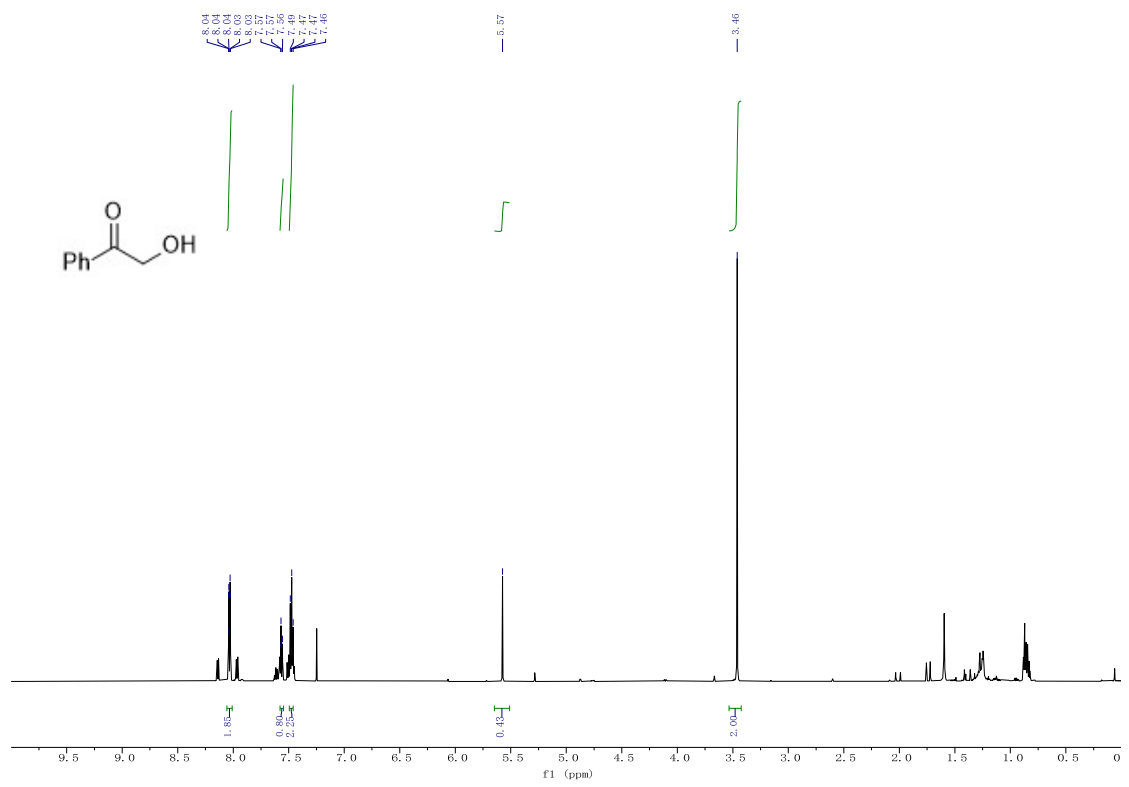

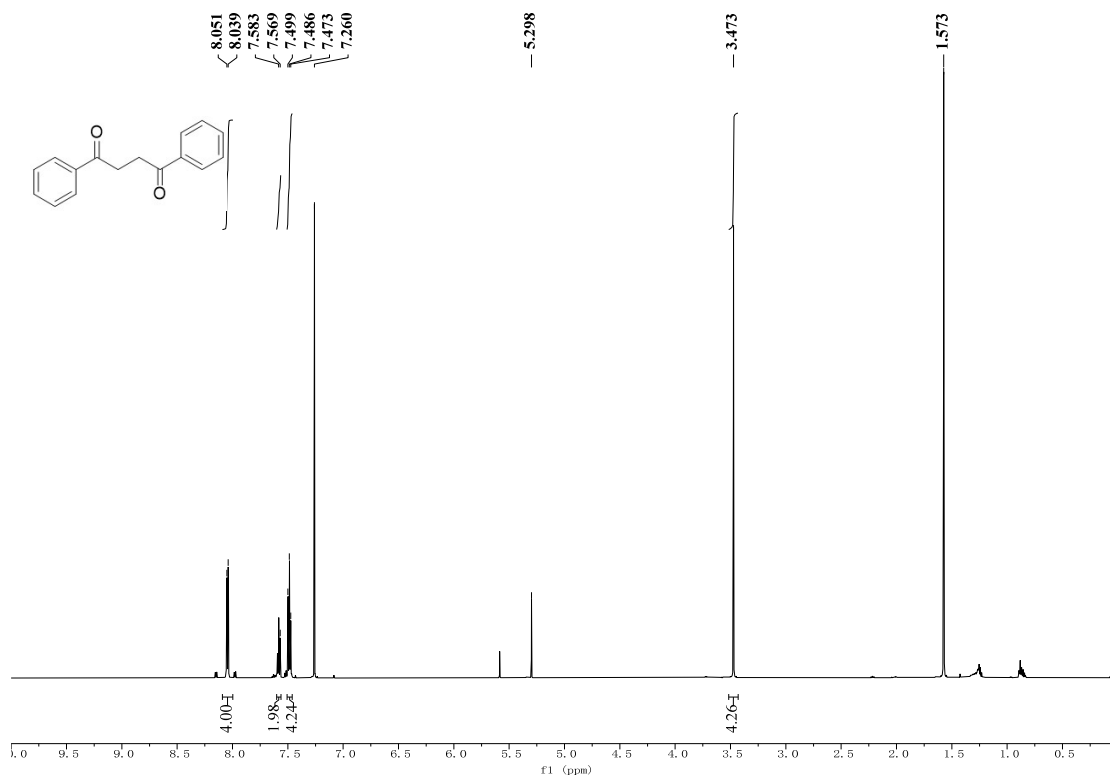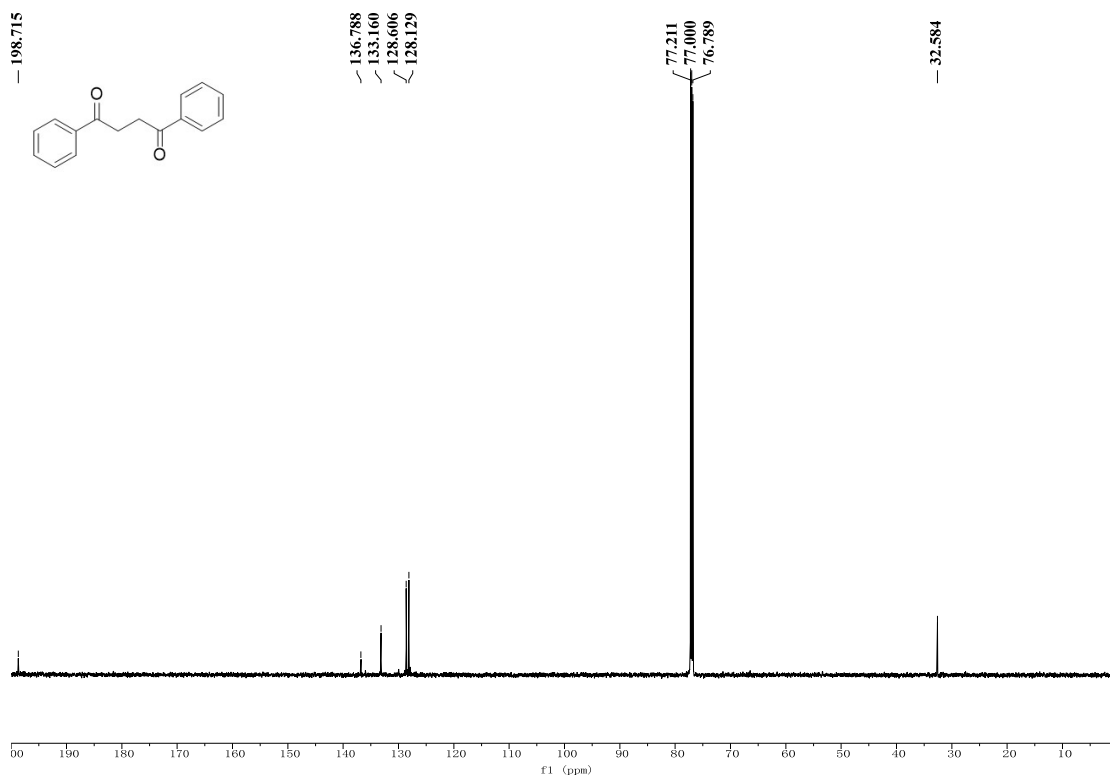

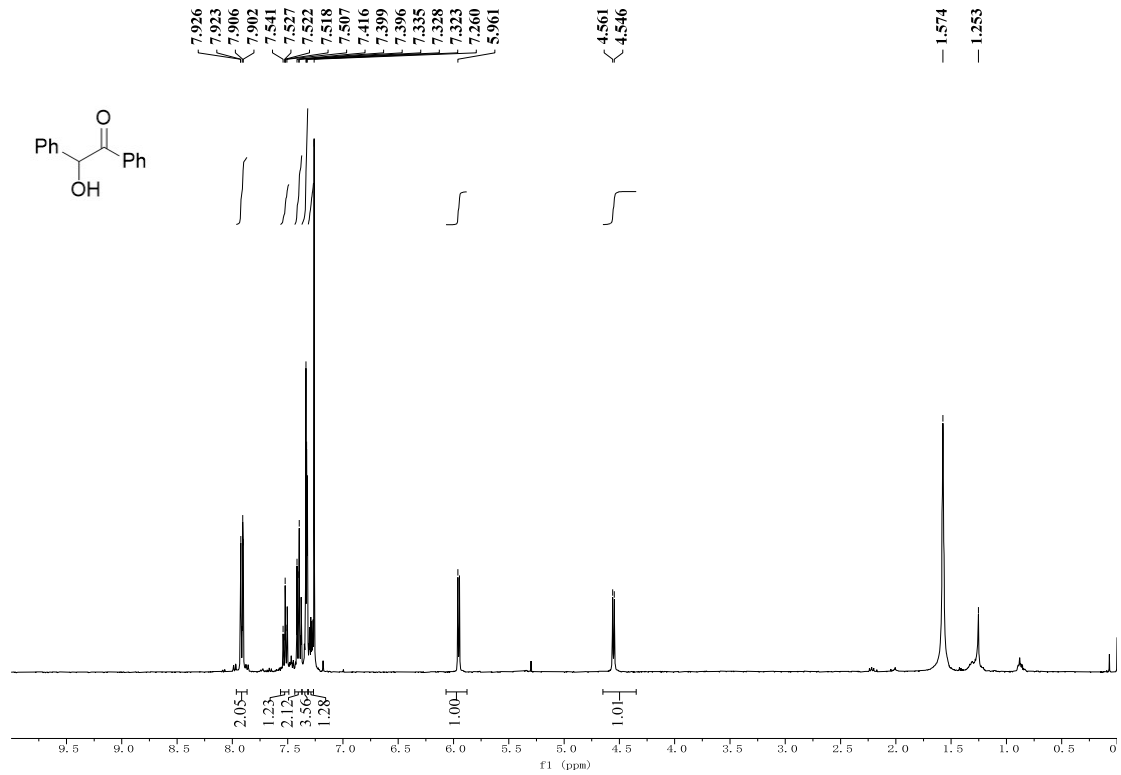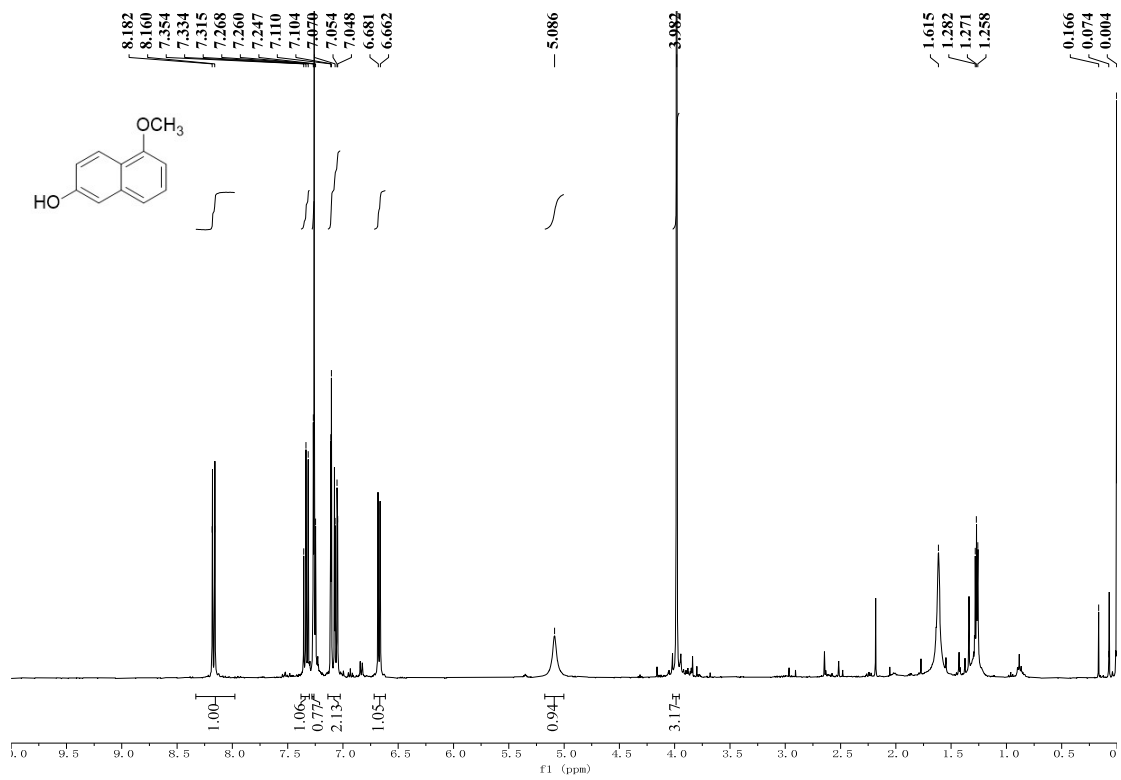

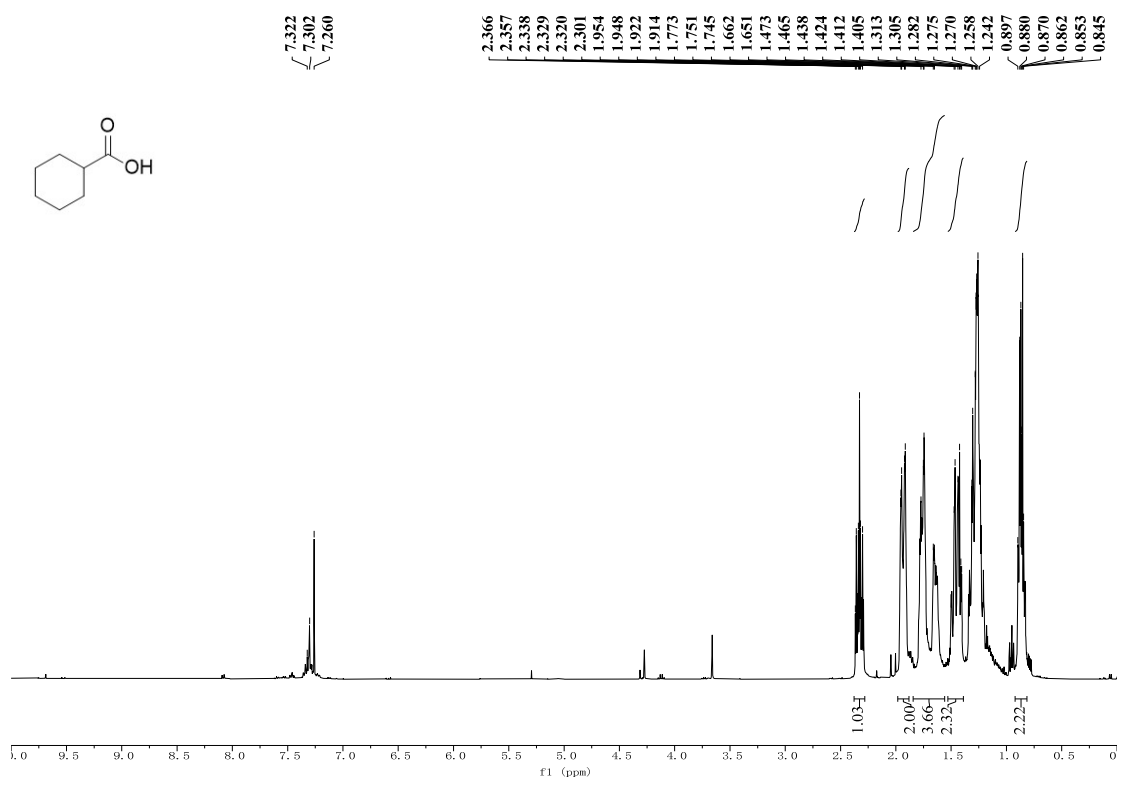

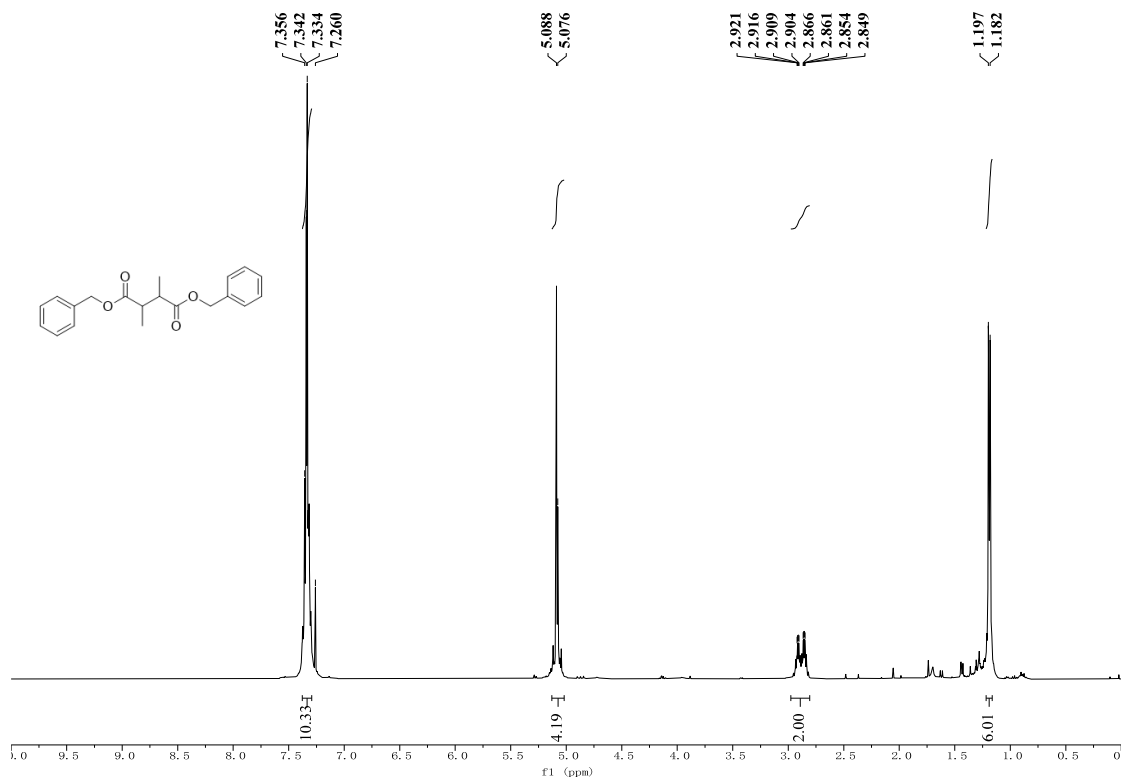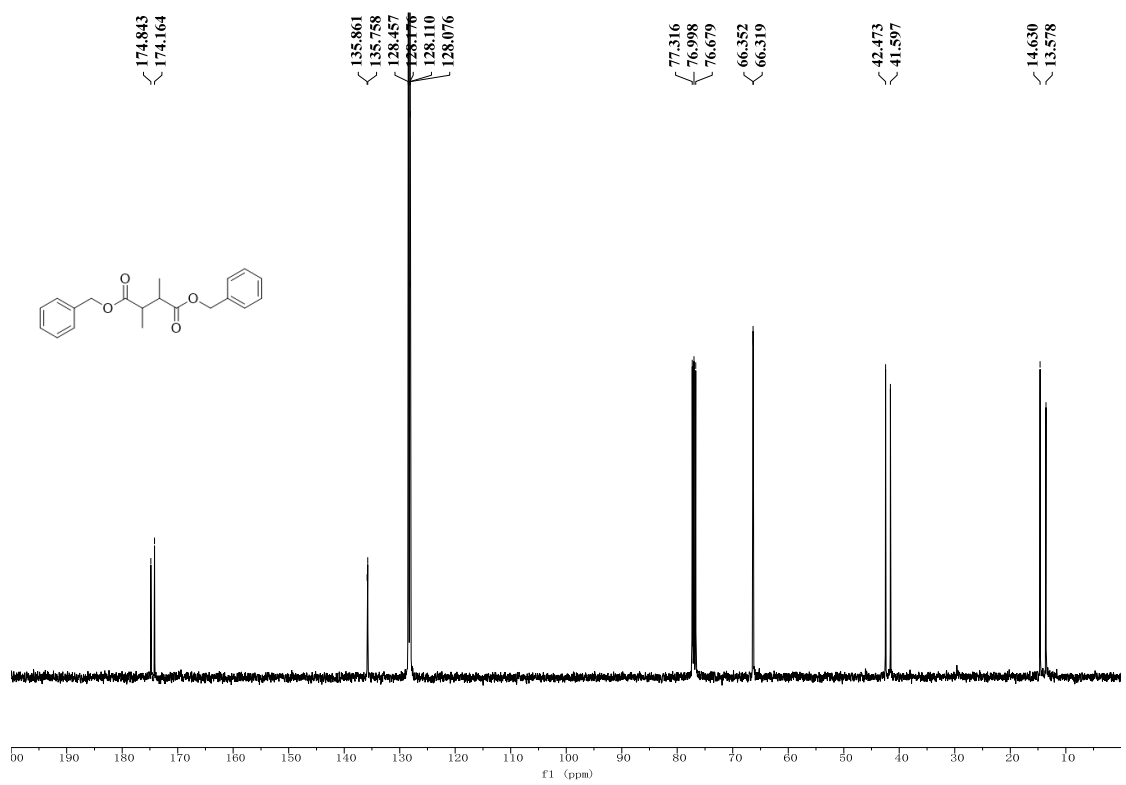

Supplement: d1cc06529g1.pdf [file d1cc06529g1.pdf]
